# Supplementary material for: Drug repositioning by applying ‘expression profiles’ generated by integrating chemical structure similarity and gene semantic similarity
Source: Royal Society of Chemistry journal article supplement (doi:10.1039/c3mb70554d), 2014-02-13
Supplement: c3mb70554d2.pdf [file c3mb70554d2.pdf]

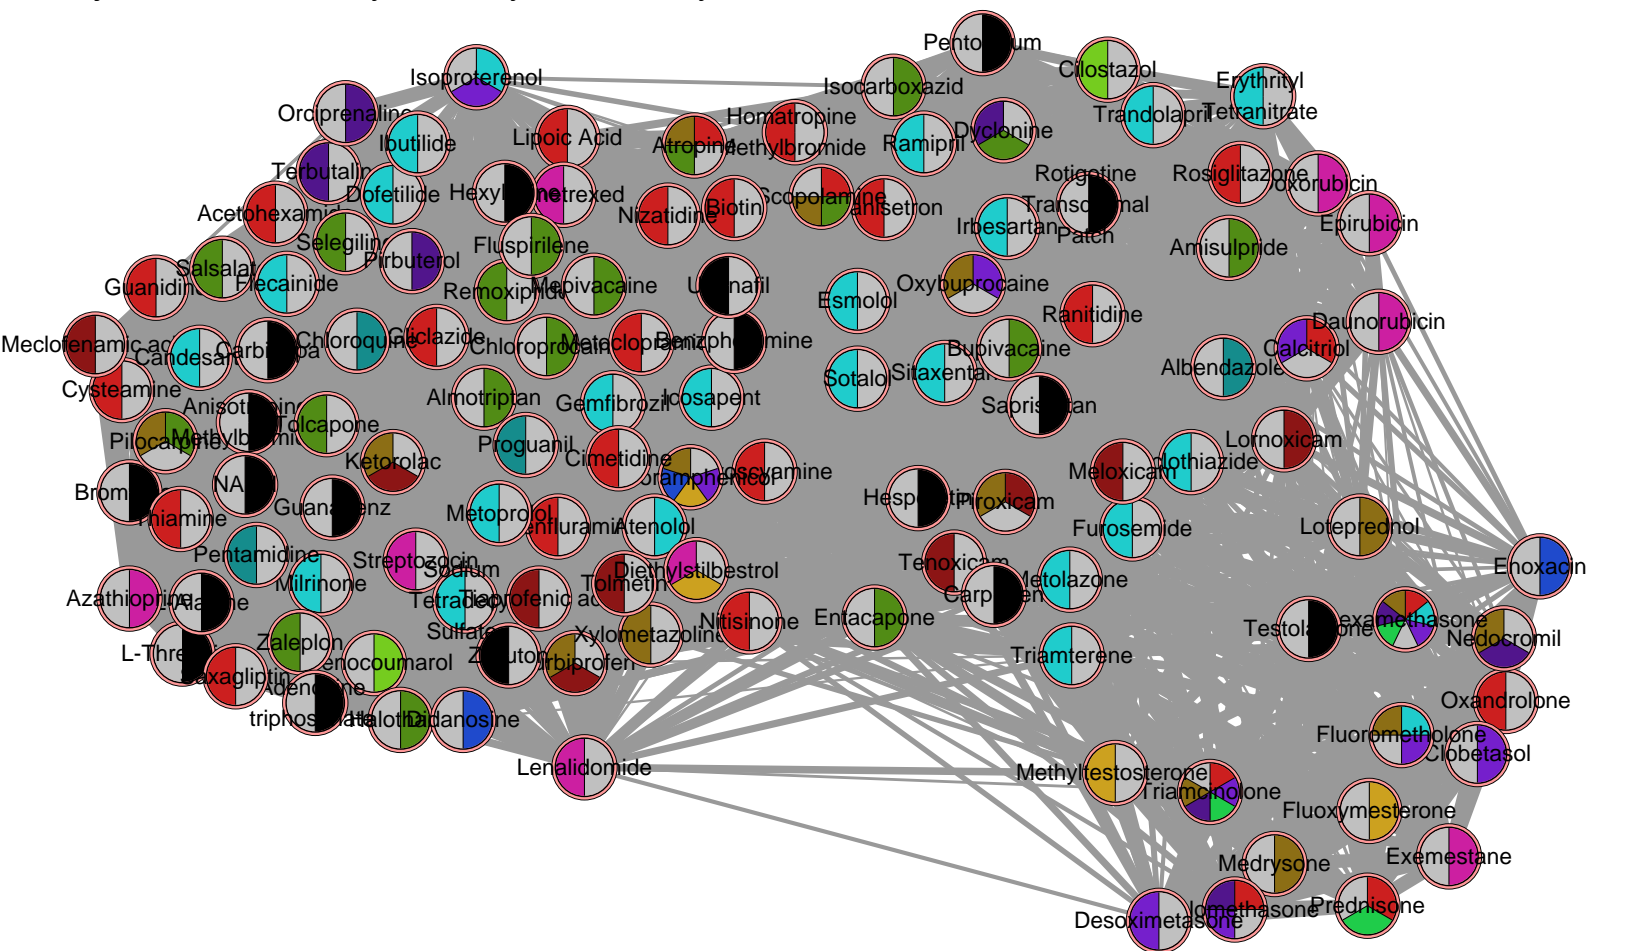

Cluster 1:

Entacapone, Dyclonine, Esmolol, Ketorolac, Proguanil, Azathioprine, Carbidopa, Calcitriol, Udenafil, Erythryl Tetranitrate, Icosapent, Meclofenamic acid, Acetohexamide, Acenocoumarol, Triamterene, Atenolol, Epirubicin, Prednisone, Amisulpride, Exemestane, Rosiglitazone, Chloroquine, Desoximetasone, Streptozocin, Isoproterenol, Carprofen, Xylometazoline, Dofetilide, Guanabenz, Sapisartan, Cimetidine, Isocarboxazid, Gliclazide, Daunorubicin, Doxorubicin, Scopolamine, Clobetasol, Guanidine, Cysteamine, Lenalidomide, Triamcinolone, Piroxicam, Flurbiprofen, Didanosine, Salsalate, Loteprednol, Pemetrexed, Anisotropine Methylbromide, Fluspirilene, Pentamidine, Sotalol, Metoclopramide, Albendazole, NADH, Irbesartan, Zaleplon, Terbutaline, Lipoic Acid, Beclomethasone, Ranitidine, Ibutilide, Bromfenac, Nizatidine, Homatropine Methylbromide, Saxagliptin, Sitaxentan, Oxandrolone, Fluoxymesterone, Fluorometholone, L-Alanine, Tolcapone, Almotriptan, Ramipril, Chloramphenicol, Milrinone, Benzphetamine, Candesartan, Halothane, Tiaprofenic acid, Diethylstilbestrol, Cyclothiazide, Medrysone, Furosemide, Cilostazol, Biotin, Methyltestosterone, Zileuton, Lornoxicam, Pilocarpine, Selegiline, Dexfenfluramine, Granisetron, Rotigotine Transdermal Patch, Tenoxicam, Pirbuterol, Dexamethasone, Sodium Tetradecyl Sulfate, Testolactone, Hexylcaine, Hyoscyamine, Orciprenaline, Enoxacin, Metoprolol, Mepivacaine, Tolmetin, Adenosine triphosphate, Metolazone, Bupivacaine, Nitisinone, L-Threonine, Hesperetin, Thiamine, Flecainide, Chloroprocaine, Atropine, Gemfibrozil, Remoxipride, Nedocromil, Oxybuprocaine, Pentolinium, Meloxicam, Trandolapril.

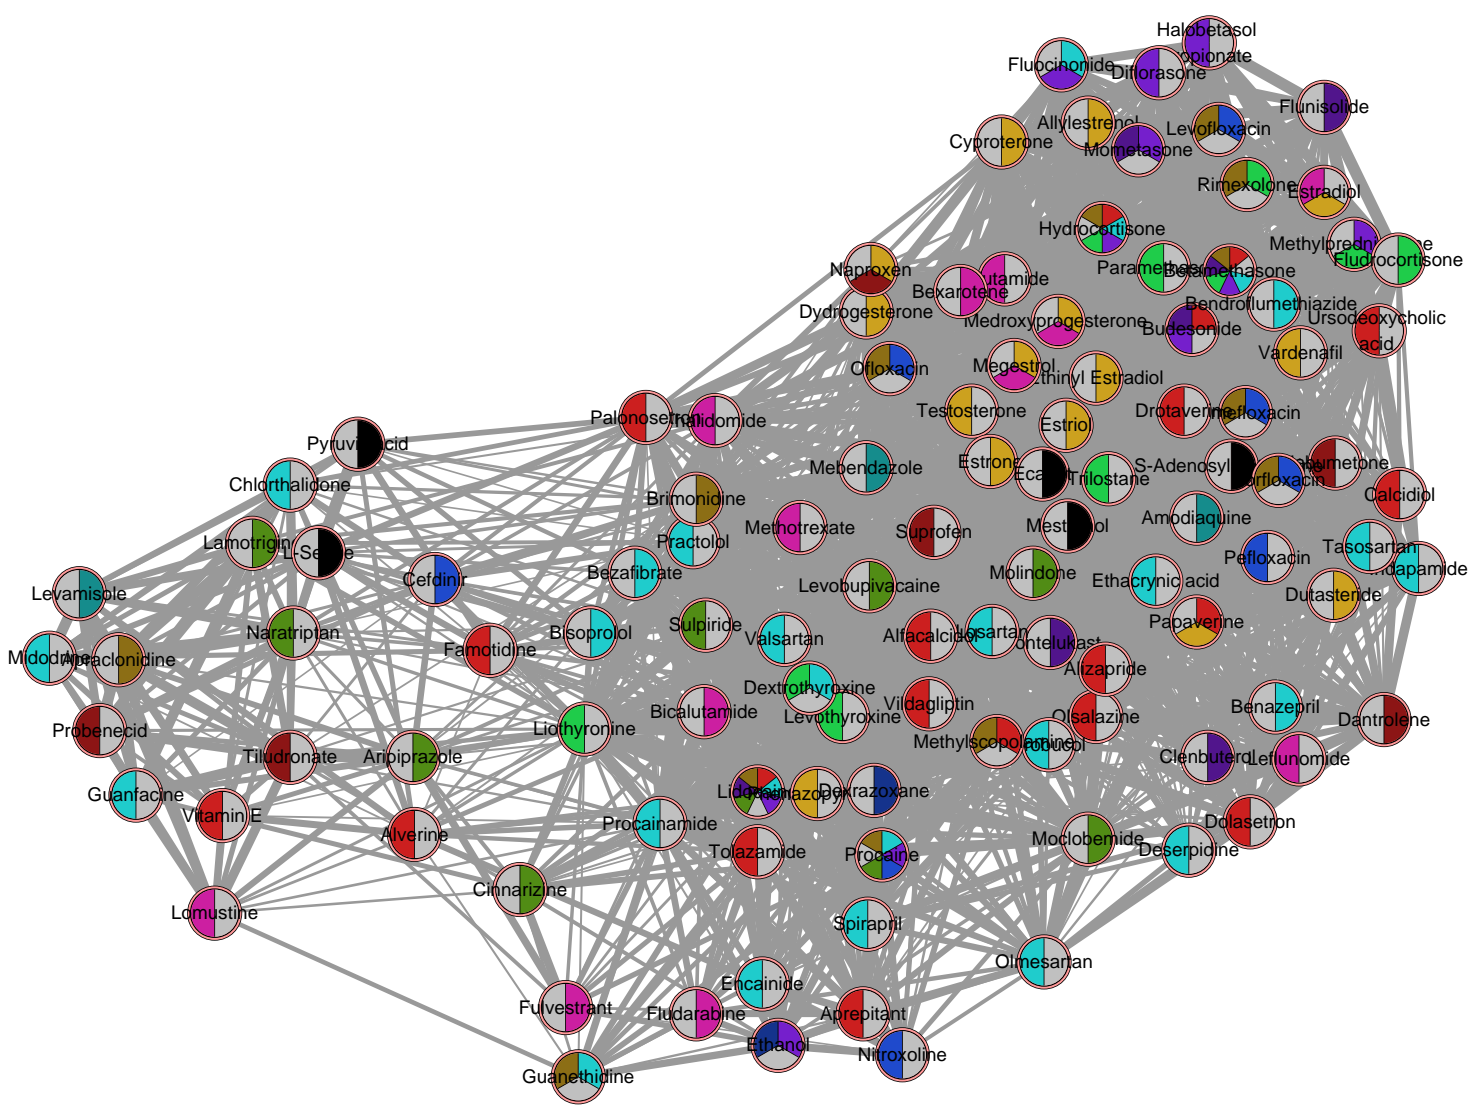

**Cluster 2:**

Deserpidine, Lidocaine, Budesonide, Hydrocortisone, Fludarabine, Tasosartan, Pefloxacin, Levofloxacin, Dutasteride, Rimexolone, Guanfacine, Midodrine, Methotrexate, Losartan, L-Serine, Valsartan, Guanethidine, Medroxyprogesterone, Lomustine, Fludrocortisone, Flunisolide, Estradiol, Naproxen, Suprofen, Ethanol, Testosterone, Ofloxacin, Estrone, S-Adenosylmethionine, Fulvestrant, Bendroflumethiazide, Levamisole, Olmesartan, Estriol, Ursodeoxycholic acid, Nitroxoline, Apraclonidine, Calcidiol, Moclobemide, Mestranol, Allylestrenol, Famotidine, Lamotrigine, Palonosetron, Liothyronine, Methylprednisolone, Lomefloxacin, Sulpiride, Cinnarizine, Alizapride, Diflorasone, Halobetasol Propionate, Probenecid, Levobupivacaine, Ethinyl Estradiol, Ecabet, Spirapril, Levothyroxine, Probuco, Bexarotene, Trilostane, Alfacalcidol, Fluocinonide, Procaine, Chlorthalidone, Practolol, Indapamide, Tolazamide, Betamethasone, Aprepitant, Dolasetron, Clenbuterol, Nabumetone, Mometasone, Nilutamide, Thalidomide, Pyruvic acid, Procainamide, Leflunomide, Encainide, Benazepril, Dexrazoxane, Naratriptan, Dantrolene, Montelukast, Vildagliptin, Phenazopyridine, Amodiaquine, Dydrogesterone, Megestrol, Cyproterone, Drotaverine, Bisoprolol, Cefdinir, Alverine, Ethacrynic acid, Methylscopolamine, Olsalazine, Vitamin E, Brimonidine, Molindone, Tiludronate, Dextrothyroxine, Norfloxacin, Mebendazole, Bicalutamide, Bezafibrate, Aripiprazole, Papaverine, Paramethasone, Vardenafil.

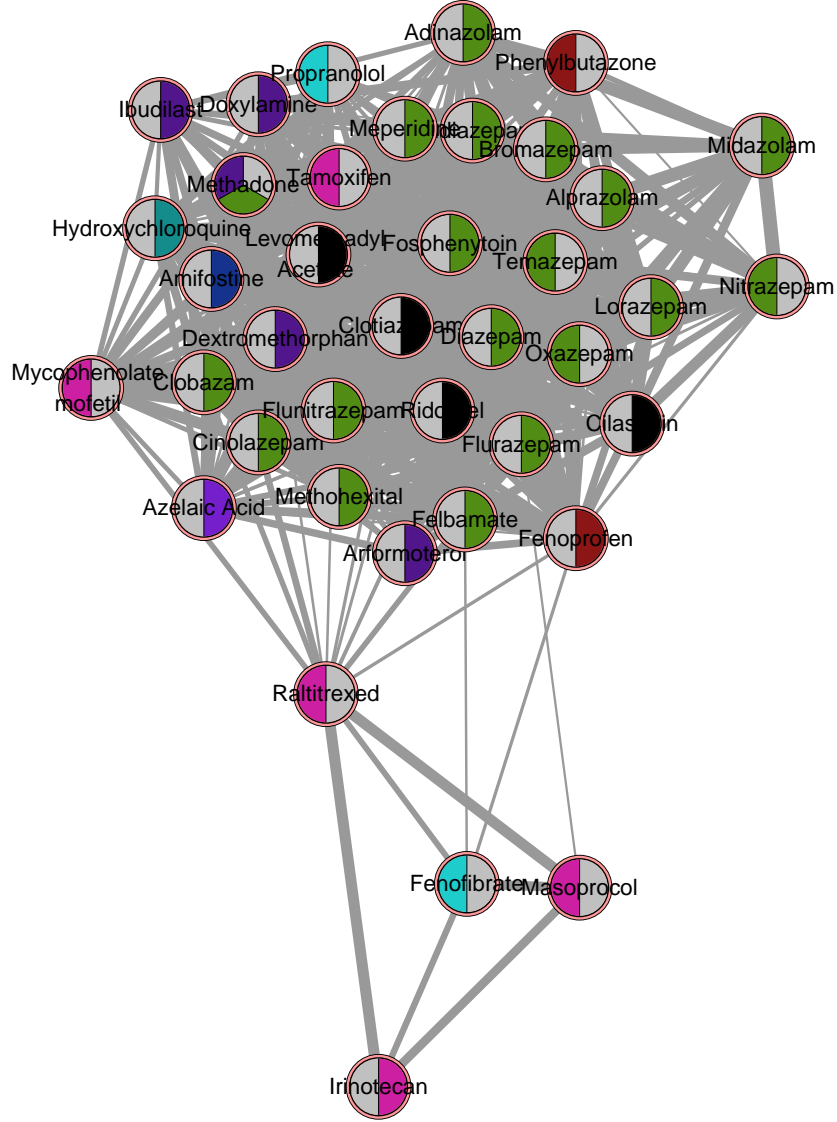

Cluster 3:  
 Methohexital, Doxylamine, Propranolol, Fludiazepam, Irinotecan, Clotiazepam, Lorazepam, Nitrazepam, Flurazepam, Fosphenytoin, Temazepam, Fenofibrate, Dextromethorphan, Phenylbutazone, Arformoterol, Diazepam, Masoprocol, Methadone, Ibudilast, Alprazolam, Tamoxifen, Hydroxychloroquine, Cilastatin, Ridogrel, Levomefadyl Acetate, Amifostine, Adinazolam, Bromazepam, Oxazepam, Meperidine, Raltitrexed, Cinolazepam, Fenopropfen, Azelaic Acid, Flunitrazepam, Mycophenolate mofetil, Clobazam, Midazolam, Felbamate.

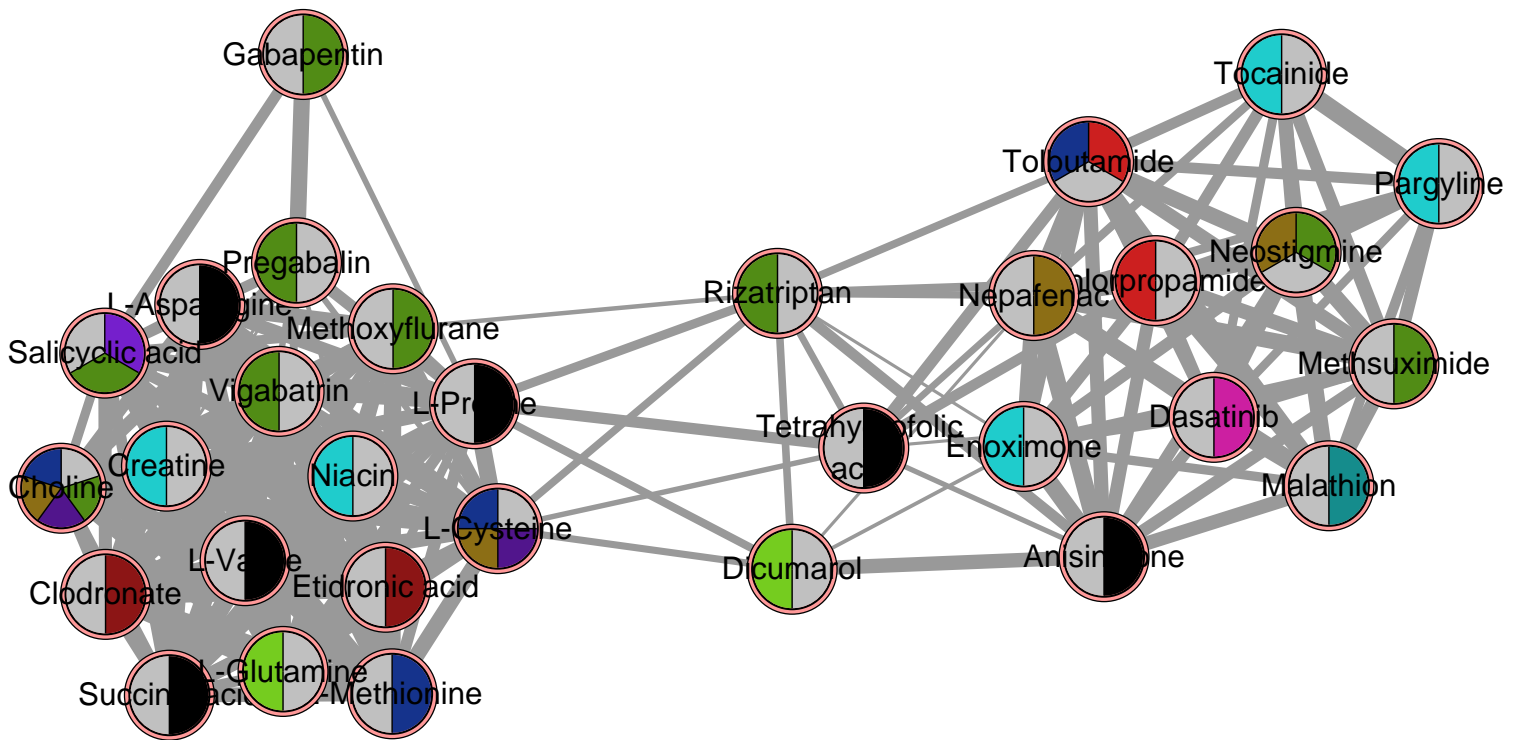

Cluster 4:

Succinic acid, Creatine, Malathion, Clodronate, Salicyclic acid, Pargyline, Niacin, Choline, Dicumarol, Tolbutamide, Enoximone, Anisindione, L-Methionine, Methoxyflurane, Vigabatrin, L-Glutamine, Tetrahydrofolic acid, L-Cysteine, Neostigmine, Etidronic acid, L-Valine, L-Asparagine, Dasatinib, Chlorpropamide, Pregabalin, Methsuximide, Nepafenac, L-Proline, Tocainide, Gabapentin, Rizatriptan.

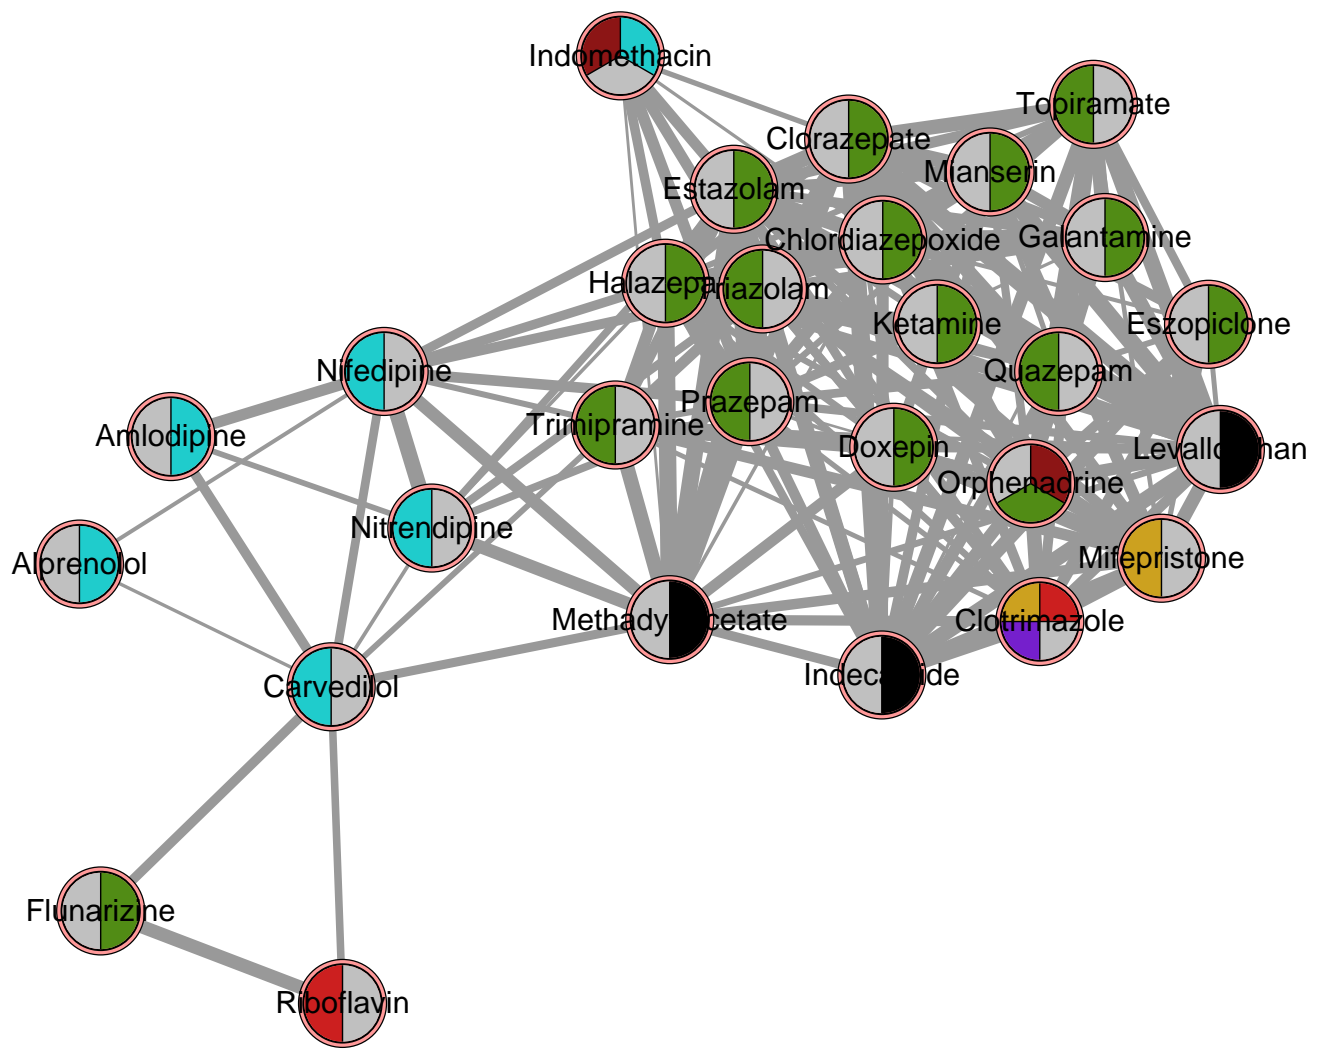

Cluster 5:

Galantamine, Nifedipine, Clorazepate, Mianserin, Prazepam, Alprenolol, Nitrendipine, Indecainide, Chlordiazepoxide, Methadyl Acetate, Mifepristone, Quazepam, Amlodipine, Riboflavin, Triazolam, Indomethacin, Orphenadrine, Halazepam, Levallorphan, Topiramate, Trimipramine, Estazolam, Carvedilol, Eszopiclone, Ketamine, Flunarizine, Clotrimazole, Doxepin.

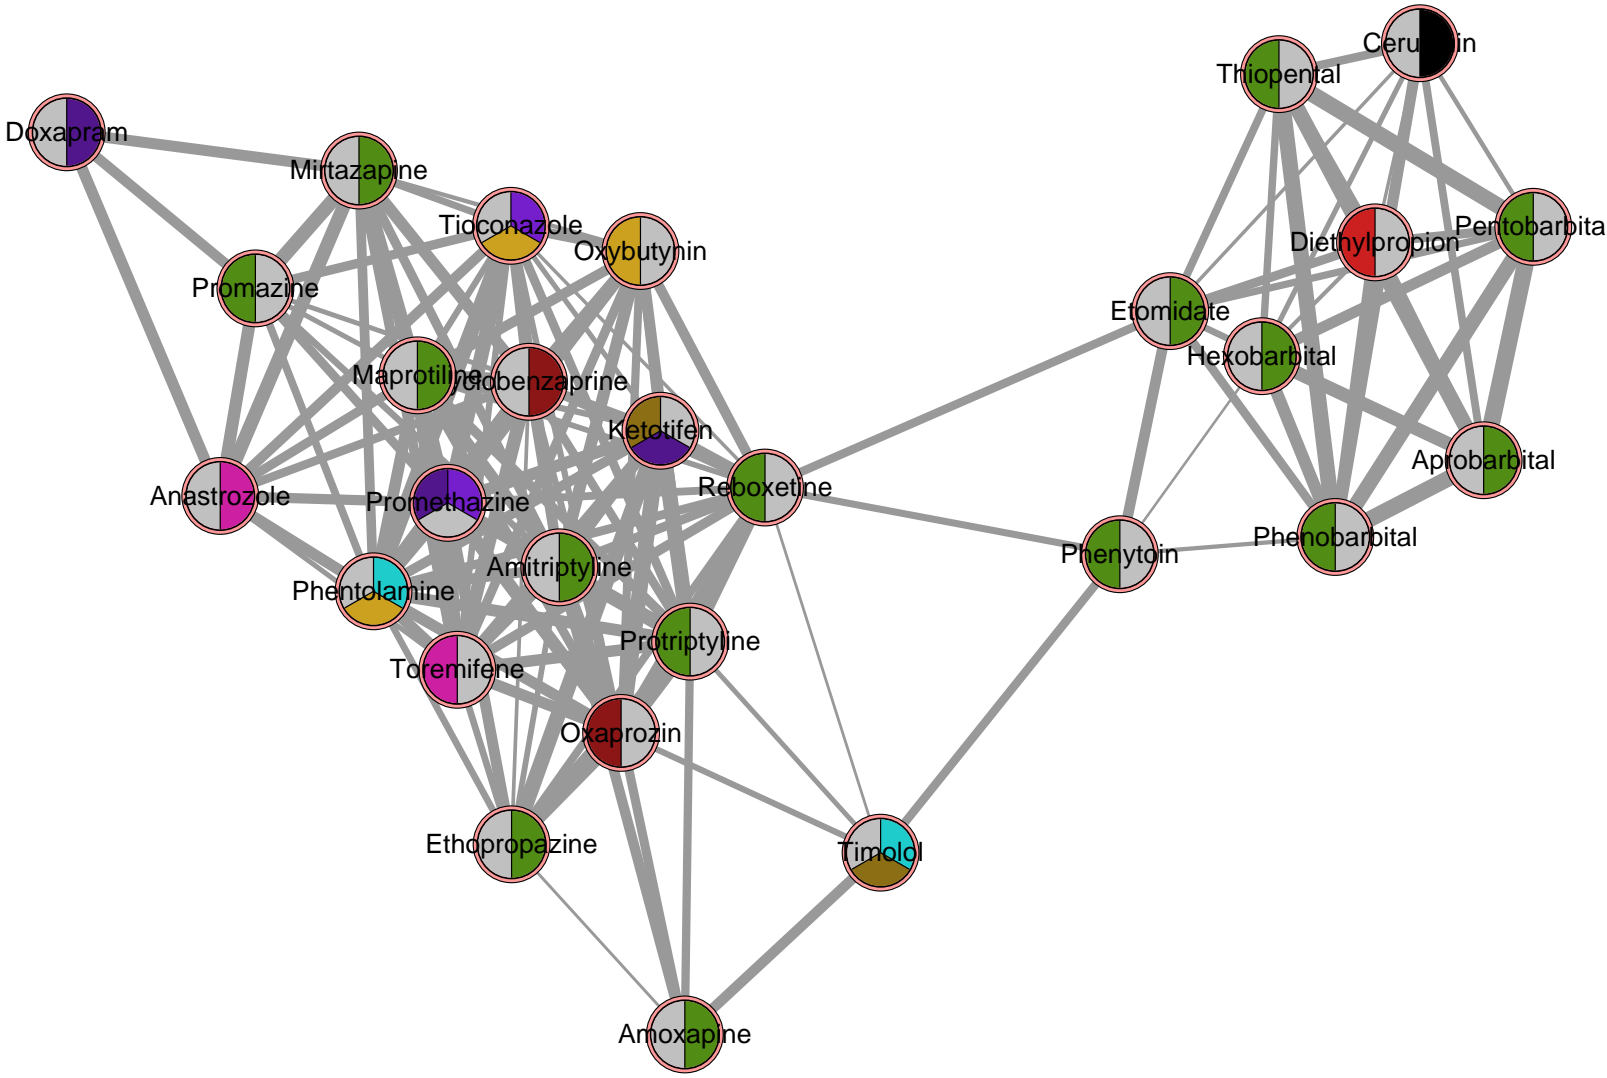

Cluster 6:  
 Oxybutynin, Cyclobenzaprine, Doxapram, Mirtazapine, Promethazine, Amitriptyline,  
 Tioconazole, Diethylpropion, Phenytoin, Reboxetine, Etomidate, Amoxapine,  
 Phenobarbital, Promazine, Oxaprozin, Protriptyline, Aprobarrbital, Hexobarbital,  
 Ketotifen, Thiopental, Toremifene, Maprotiline, Ethopropazine, Cerulenin,  
 Phentolamine, Anastrozole, Pentobarbital, Timolol.

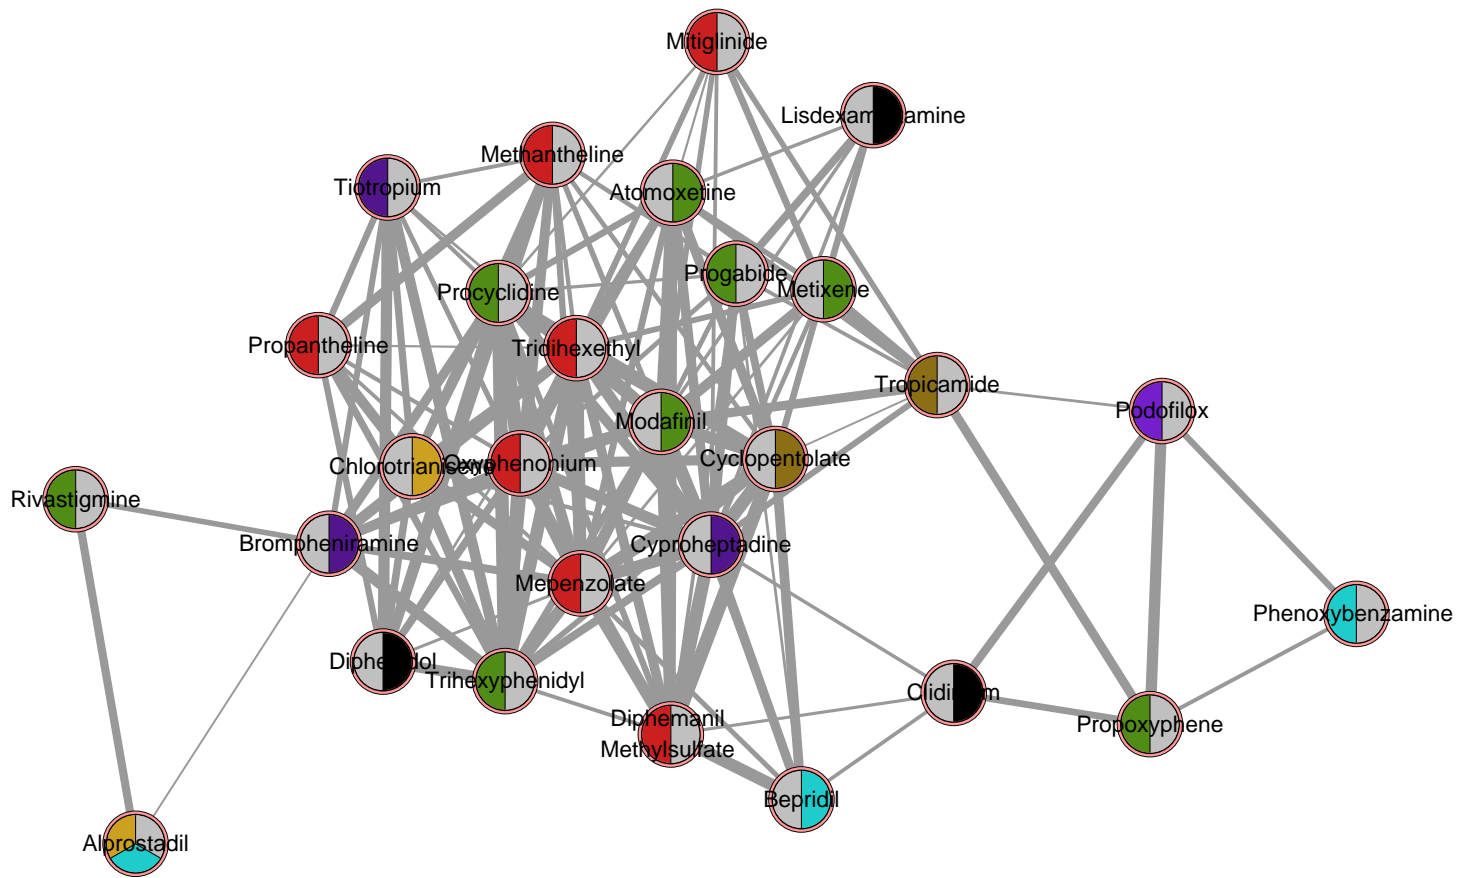

**Cluster 7:**

Metixene, Atomoxetine, Diphe-manil Methylsulfate, Tridihexethyl, Phenoxybenzamine, Methantheline, Modafinil, Pricyclidine, Lisdexanfetamine, Trihexyphenidyl, Cyclopentolate, Bepri-dil, Tiotropium, Mepenzolate, Tropicamide, Cyproheptadine, Podofilox, Mitiglinide, Chlorotrianisene, Propantheline, Progabide, Brompheniramine, Clidini-um, Propoxyphene, Oxyphenonium, Rivastigmine, Diphenidol, Alprostadi-l.

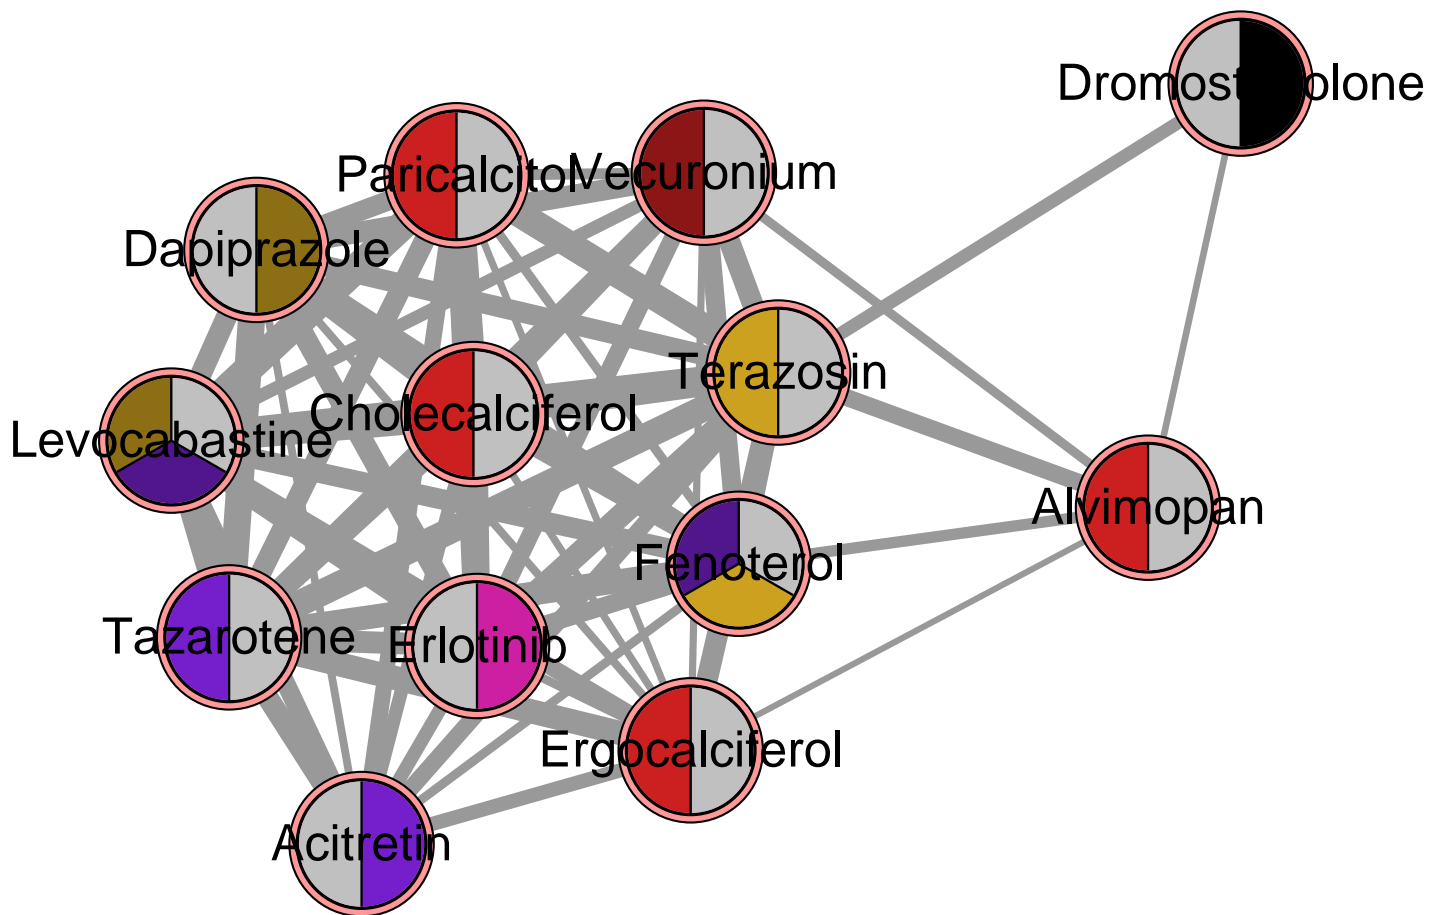

Cluster 8:  
 Dromostanolone, Terazosin, Acitretin, Dapiprazole, Alvimopan, Paricalcitol,  
 Vecuronium, Cholecalciferol, Tazarotene, Erlotinib, Fenoterol, Levocabastine,  
 Ergocalciferol.



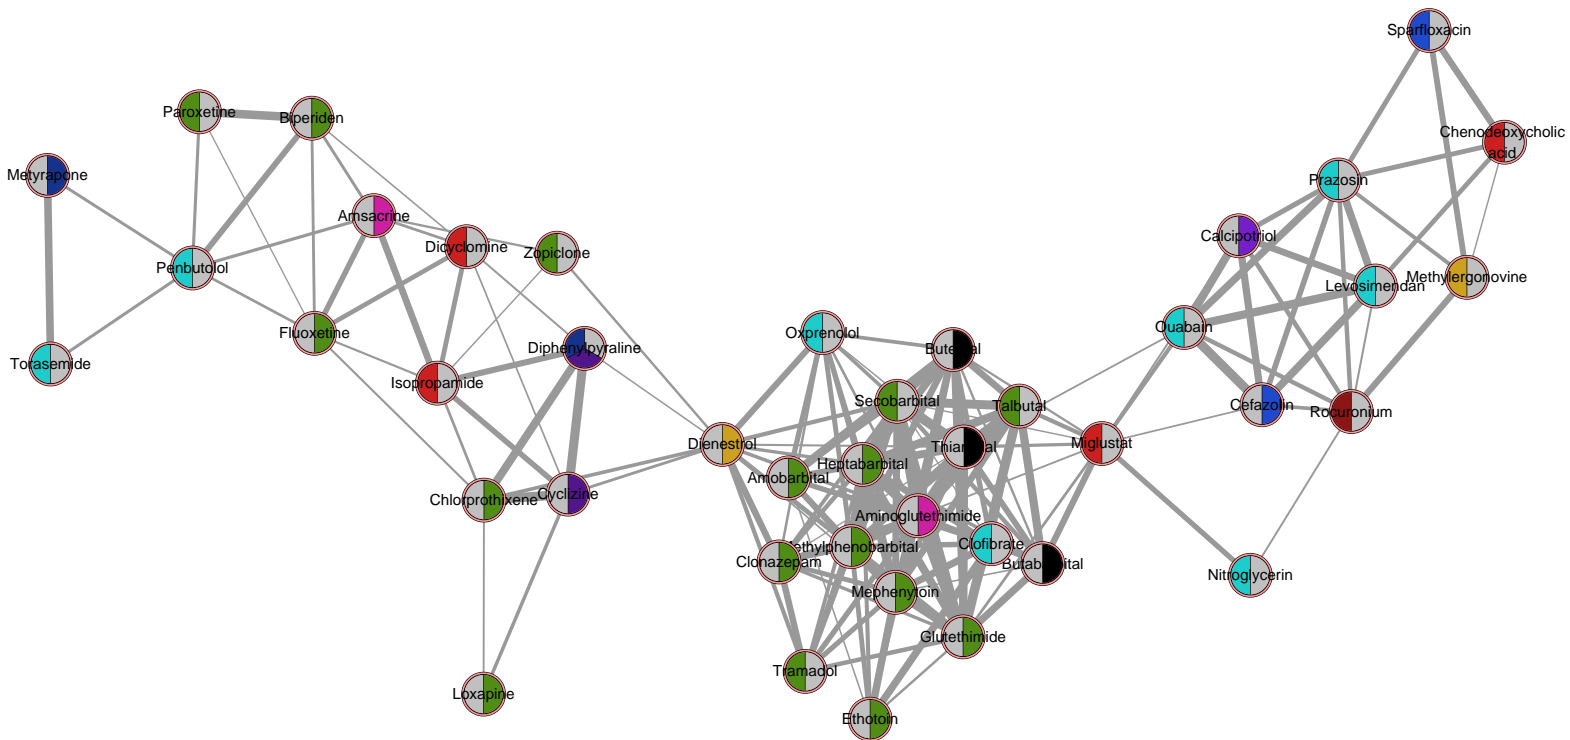

Cluster 9:  
 Chenodeoxycholic acid, Aminoglutethimide, Isopropamide, Butethal, Sparfloxacin,  
 Secobarbital, Loxapine, Butabarbital, Methylergonovine, Talbutal, Zopiclone, Rocuronium,  
 Calcipotriol, Clofibrate, Amsacrine, Penbutolol, Chlorprothixene, Biperiden,  
 Diphenylpyraline, Dicyclomine, Heptabarbital, Levosimendan, Fluoxetine, Torasemide,  
 Tramadol, Cefazolin, Dienestrol, Mephenytoin, Oxprenolol, Amobarbital, Glutethimide,  
 Methylphenobarbital, Metyrapone, Miglustat, Ouabain, Nitroglycerin, Prazosin, Ethotoin,  
 Clonazepam, Paroxetine, Cyclizine, Thiamylal.

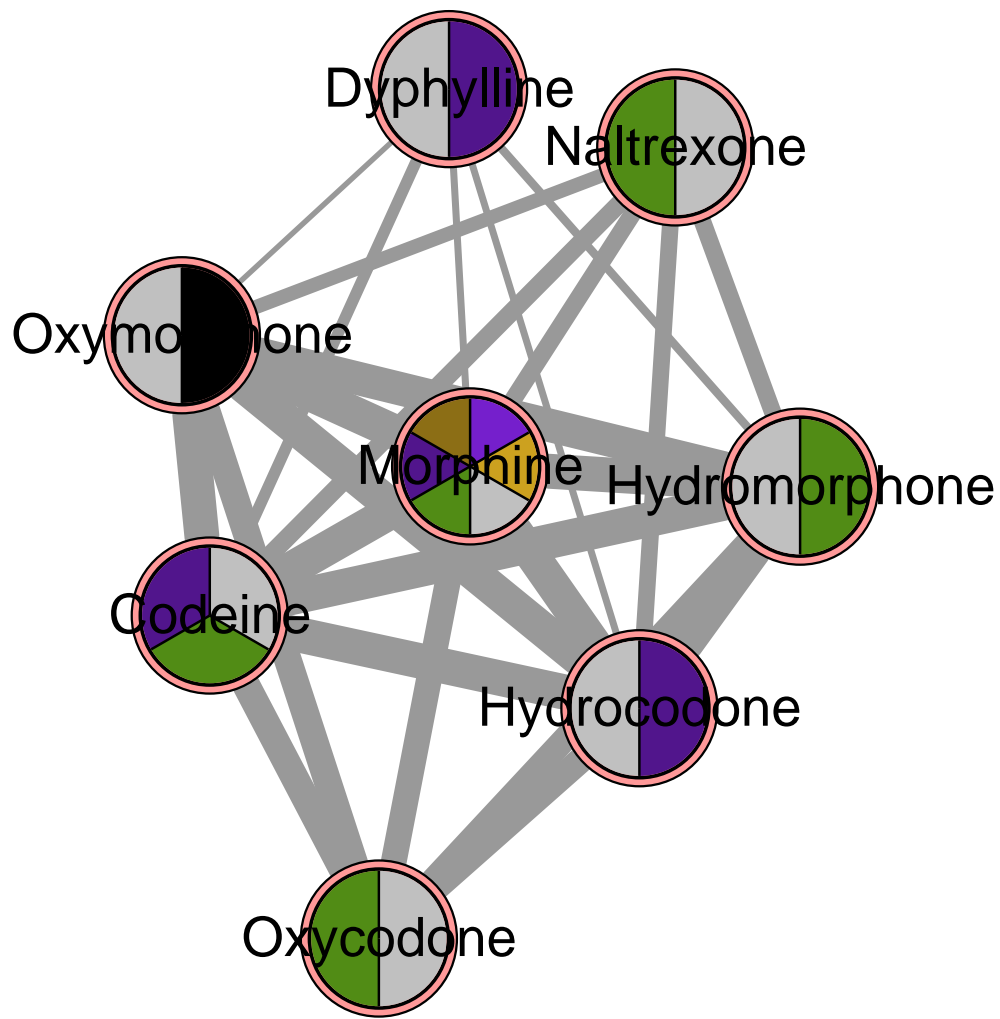

Cluster 10:  
Hydrocodone, Codeine, Morphine, Dyphylline, Naltrexone, Hydromorphone,  
Oxycodone, Oxymorphone.

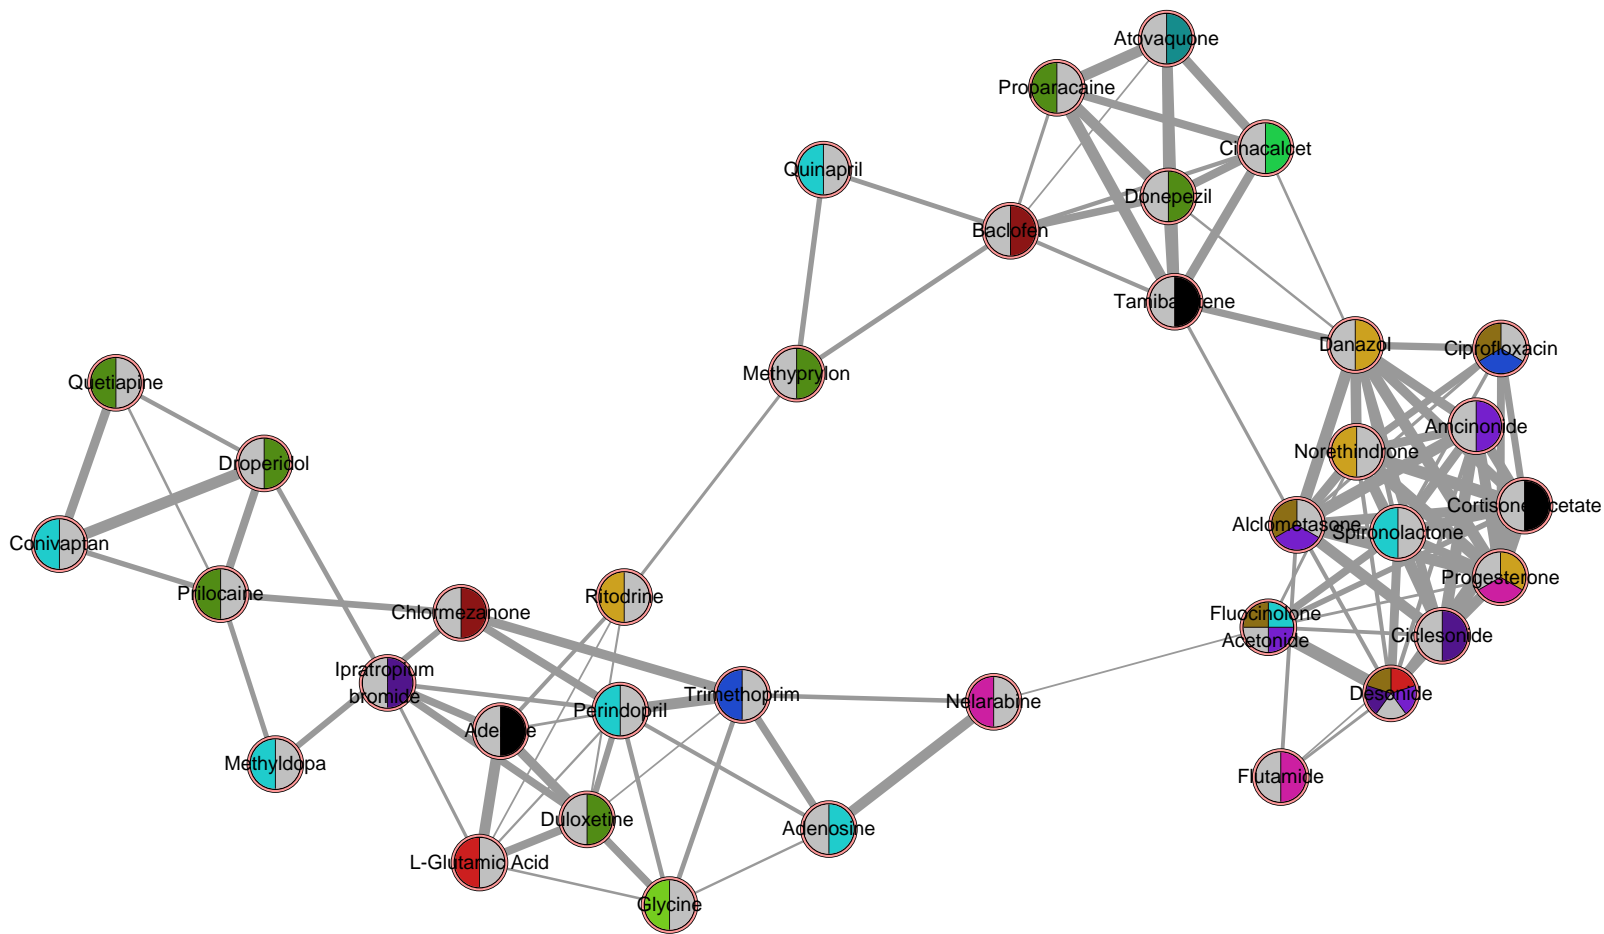

Cluster 11:  
 Norethindrone, Droperidol, Donepezil, Alclometasone, Desonide, Spironolactone,  
 Perindopril, Trimethoprim, Chlormezanone, Ciprofloxacin, Ipratropium bromide,  
 Conivaptan, Adenine, Adenosine, Ritodrine, Flucinolone Acetonide, Ciclesonide,  
 Duloxetine, Glycine, Quinapril, Prilocaine, Methyldopa, Methyprylon, Cortisone acetate,  
 Cinacalcet, Atovaquone, Proparacaine, Flutamide, Danazol, Amcinonide, Quetiapine,  
 Tamibarotene, Nelarabine, Progesterone, Baclofen, L-Glutamic Acid.

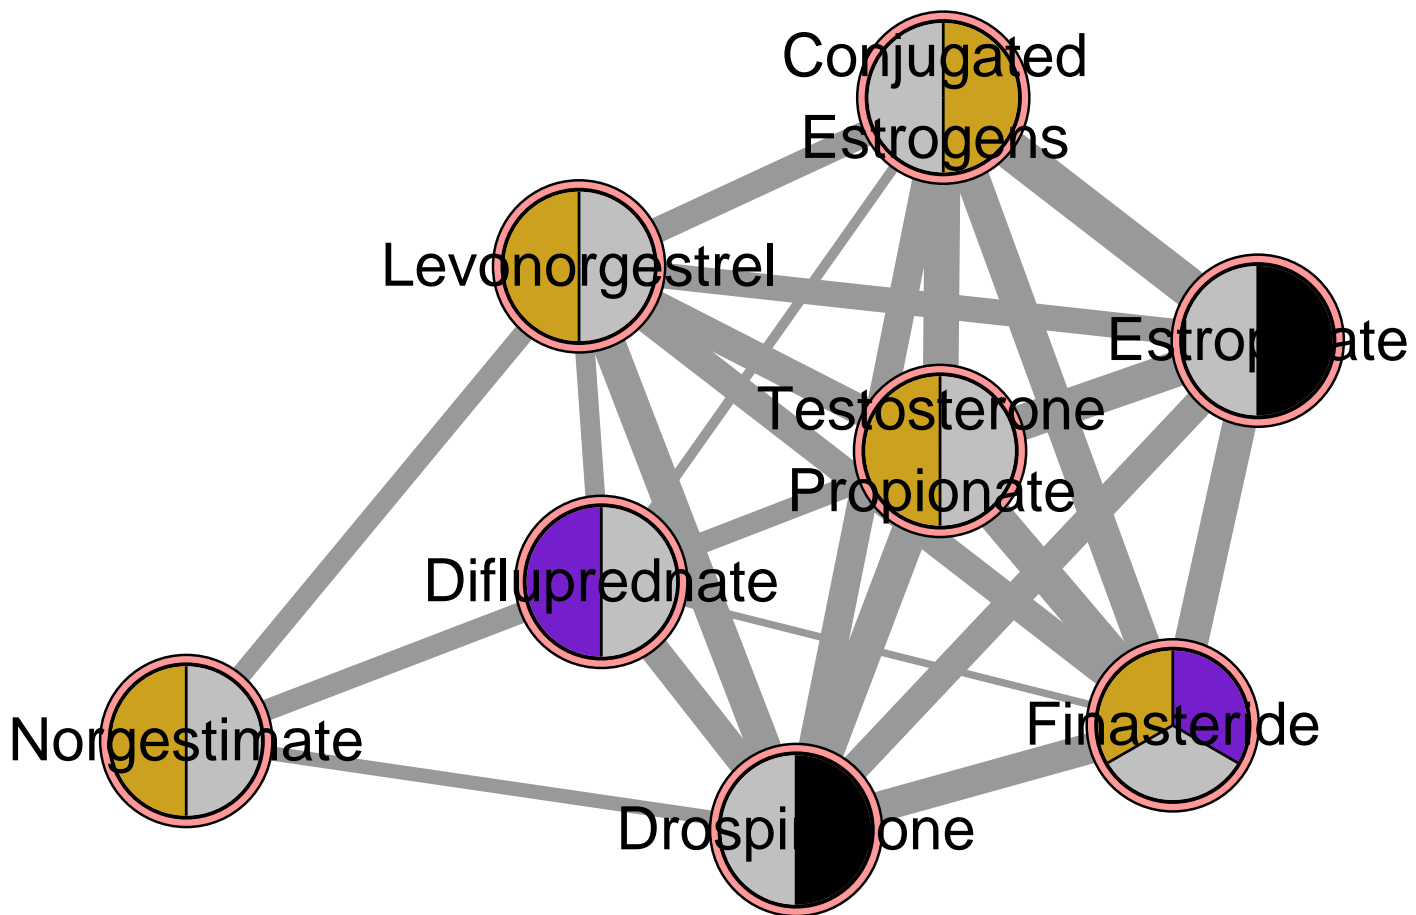

Cluster 12:  
 Finasteride, Norgestimate, Conjugated Estrogens, Drospirenone, Estropipate,  
 Difluprednate, Levonorgestrel, Testosterone Propionate.

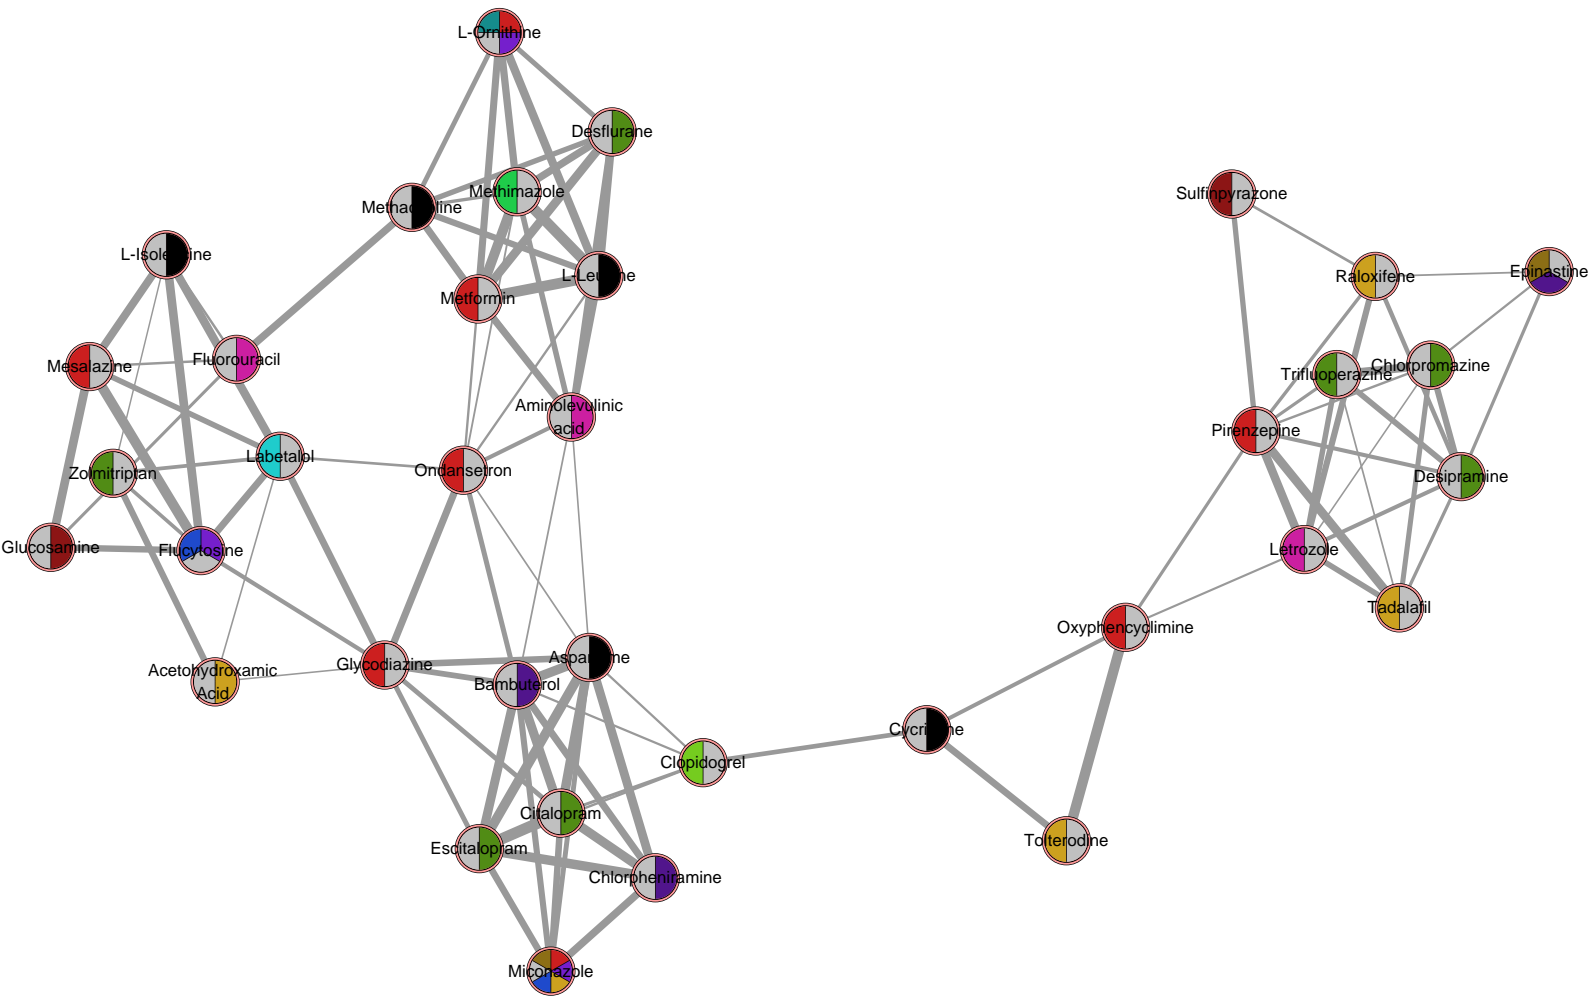

Cluster 13:  
 Aspartame, Fluorouracil, Aminolevulinic acid, L-Ornithine, Raloxifene, Methimazole,  
 Chlorpromazine, Cycrimine, Labetalol, Trifluoperazine, Tolterodine, L-Isoleucine,  
 L-Leucine, Zolmitriptan, Clopidogrel, Sulfinpyrazone, Pirenzepine, Acetohydroxamic Acid,  
 Letrozole, Flucytosine, Bambuterol, Methacholine, Miconazole, Mesalazine, Glycodiazine,  
 Escitalopram, Citalopram, Epinastine, Glucosamine, Ondansetron, Metformin, Tadalafil,  
 Chlorpheniramine, Oxyphencyclimine, Desflurane, Desipramine.

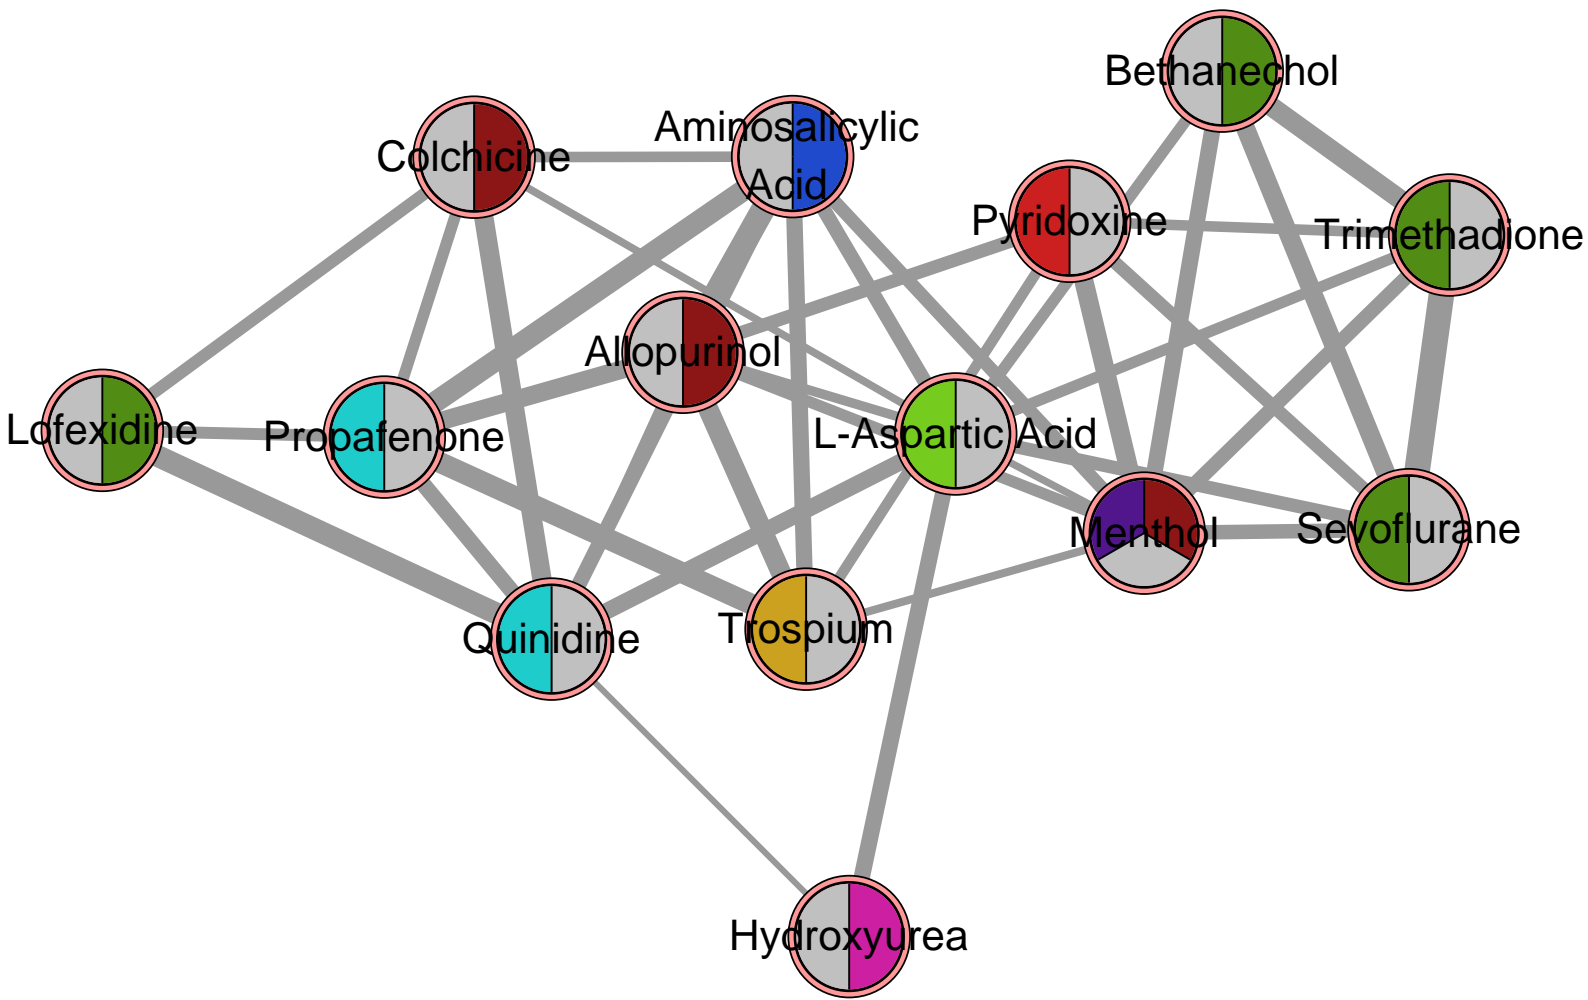

Cluster 14:  
 Aminosalicic Acid, Bethanechol, Sevoflurane, L-Aspartic Acid, Propafenone,  
 Trospium, Pyridoxine, Quinidine, Menthol, Lofexidine, Colchicine, Hydroxyurea,  
 Trimethadione, Allopurinol.

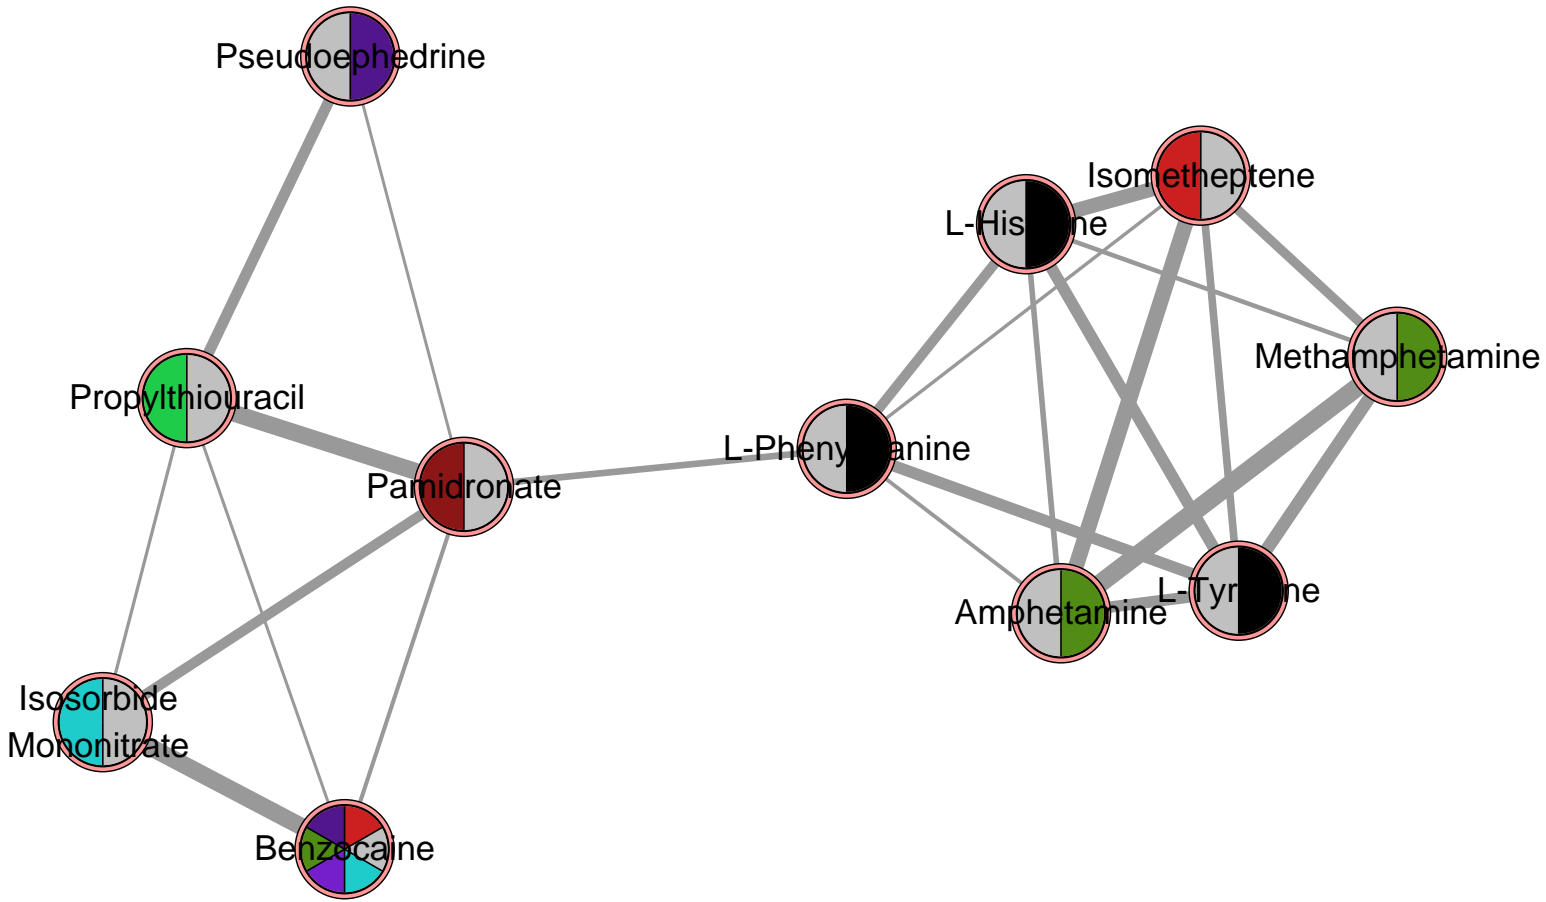

Cluster 15:  
 L-Histidine, Benzocaine, Propylthiouracil, Amphetamine, Pseudoephedrine,  
 L-Phenylalanine, Isometheptene, L-Tyrosine, Isosorbide Mononitrate,  
 Methamphetamine, Pamidronate.

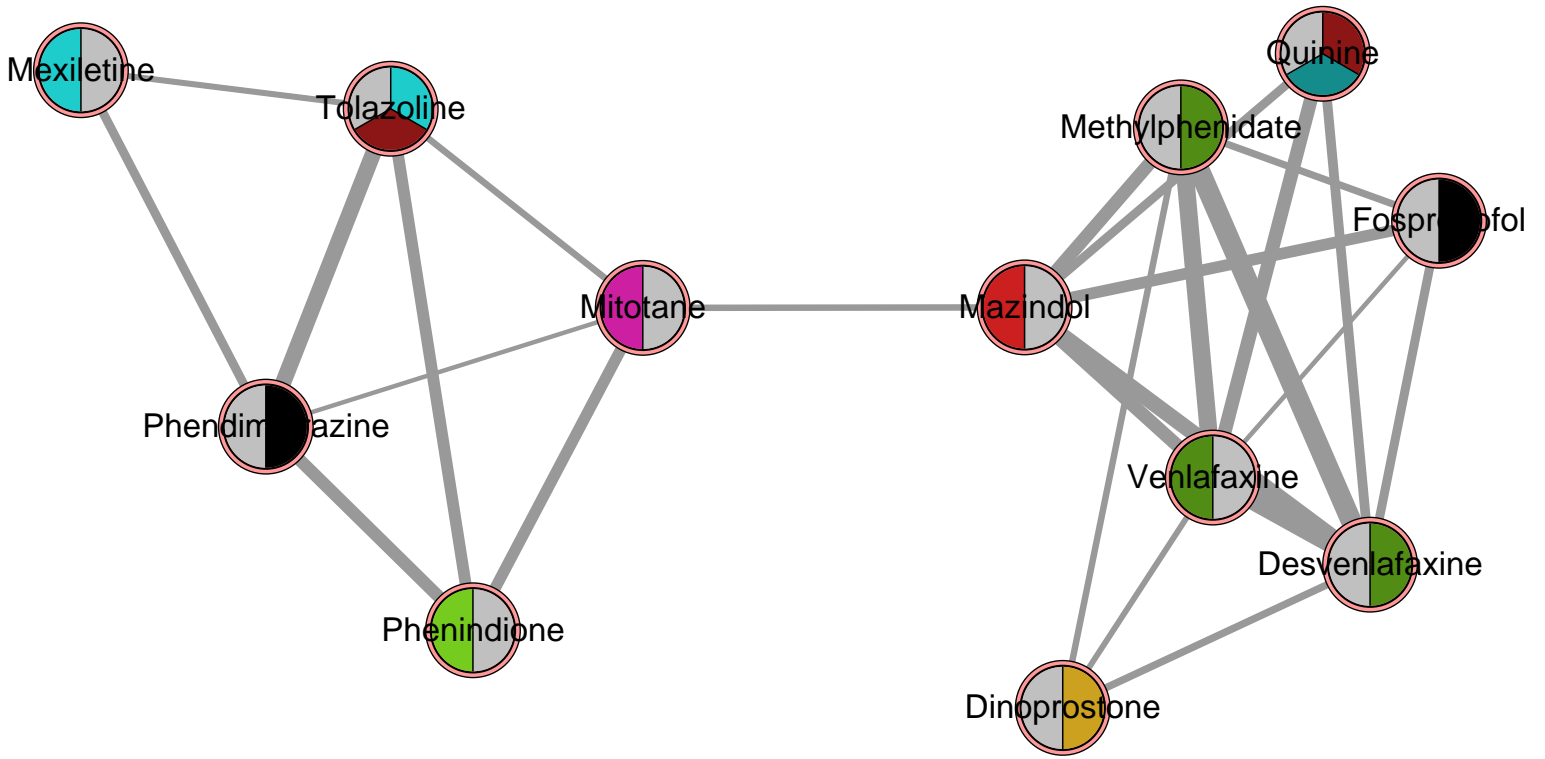

Cluster 16:  
 Phenindione, Dinoprostone, Mazindol, Venlafaxine, Fospropofol, Quinine, Desvenlafaxine,  
 Mexiletine, Mitotane, Phendimetrazine, Tolazoline, Methylphenidate.



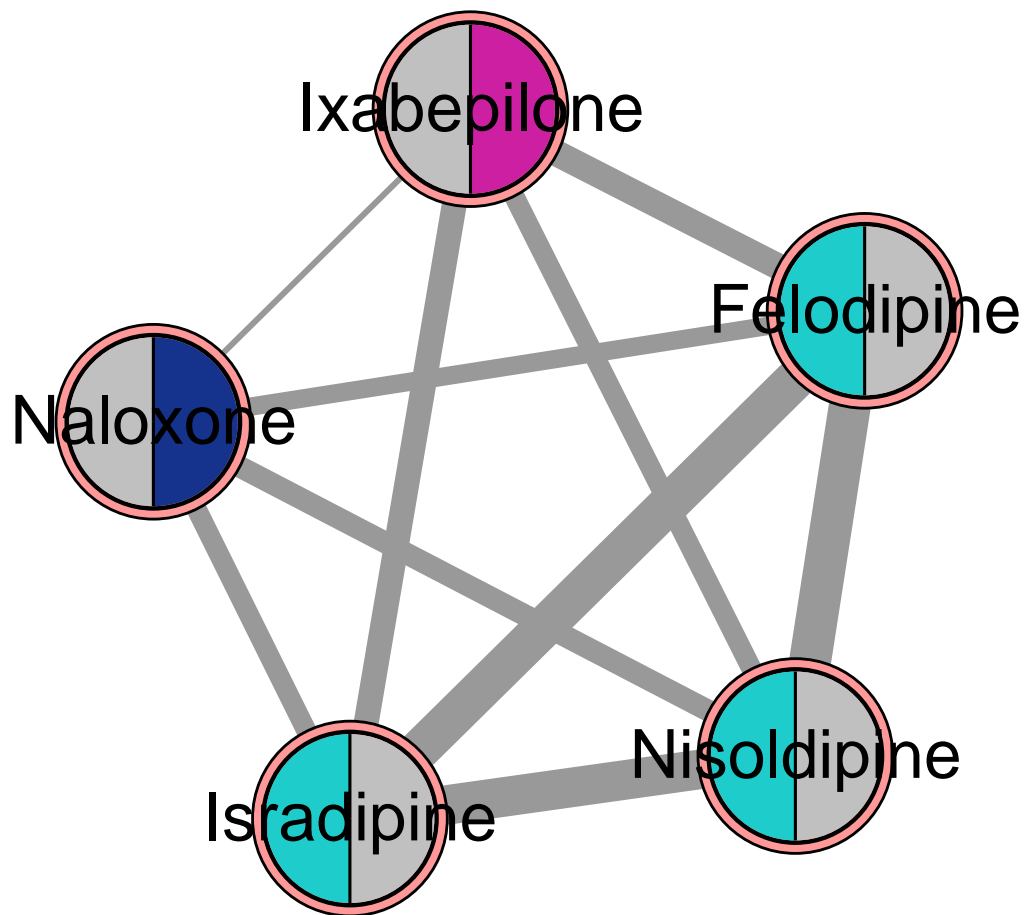

Cluster 17:  
Naloxone, Ixabepilone, Isradipine, Nisoldipine, Felodipine.

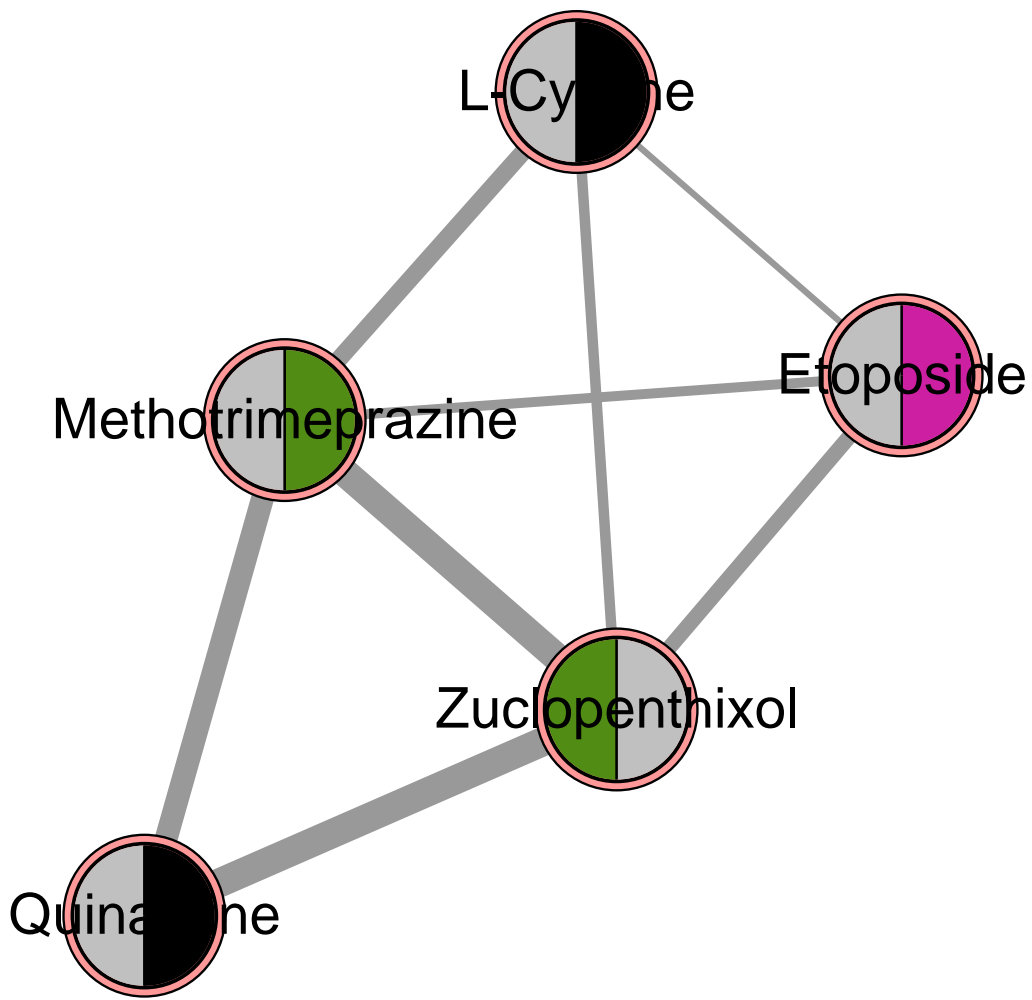

Cluster 18:  
L-Cystine,Etoposide,Zuclopenthixol,Quinacrine,Methotrimeprazine.

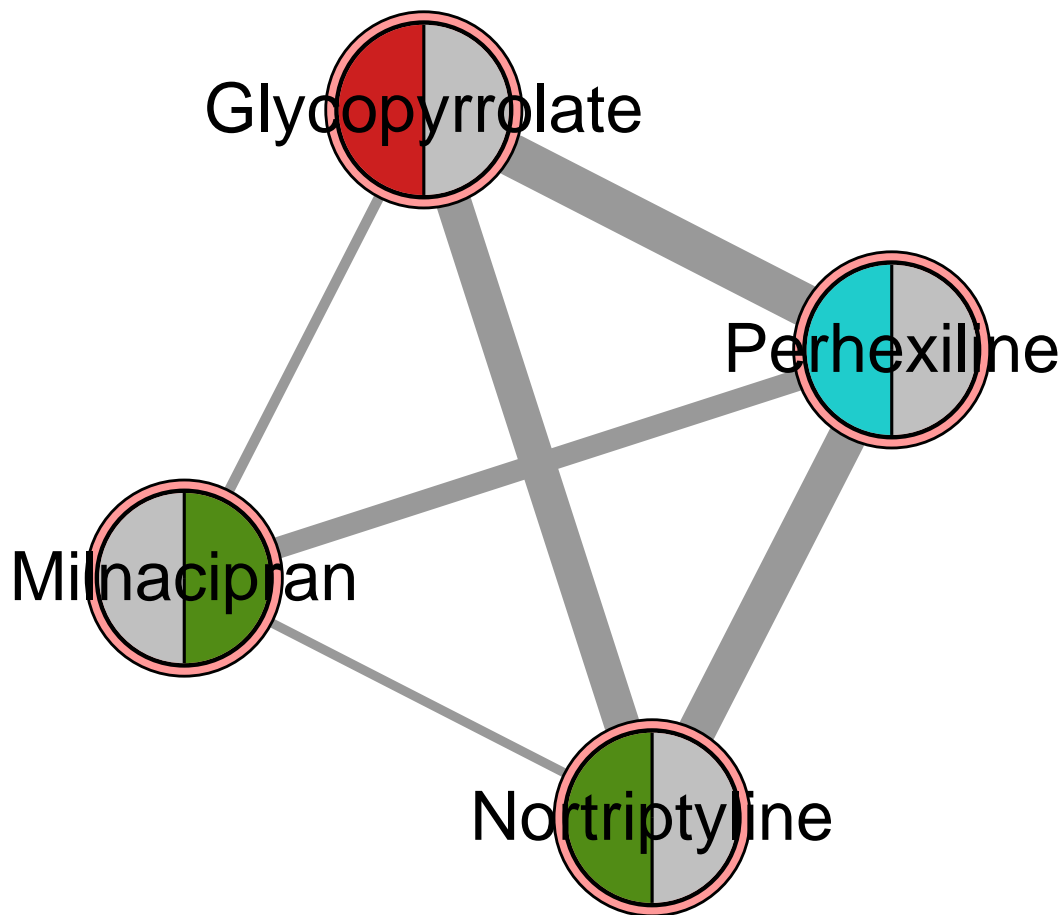

Cluster 19:  
Glycopyrrolate, Nortriptyline, Perhexiline, Milnacipran.

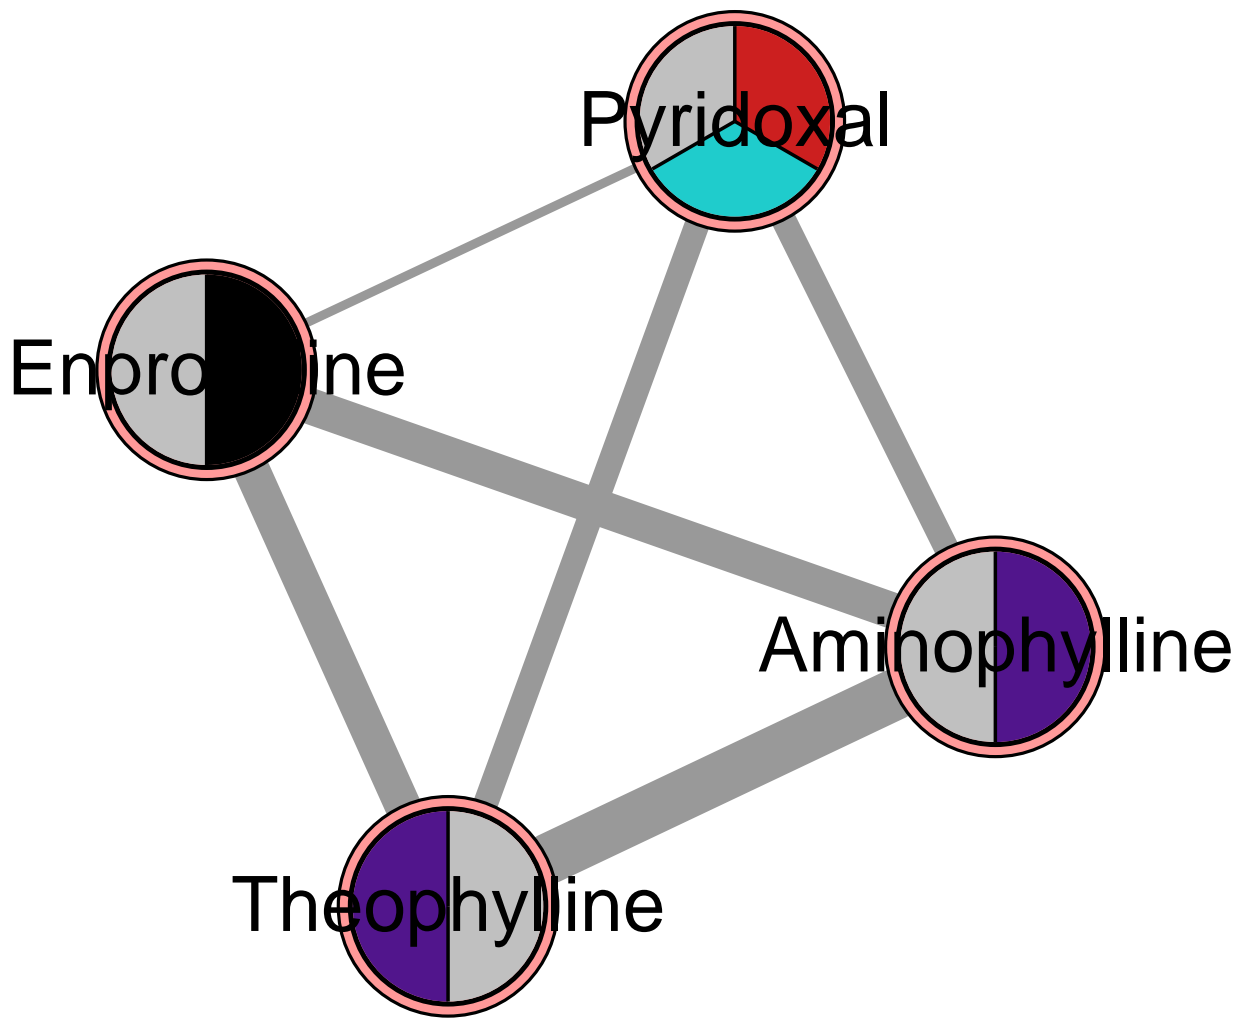

Cluster 20:  
Enprofylline, Aminophylline, Theophylline, Pyridoxal.

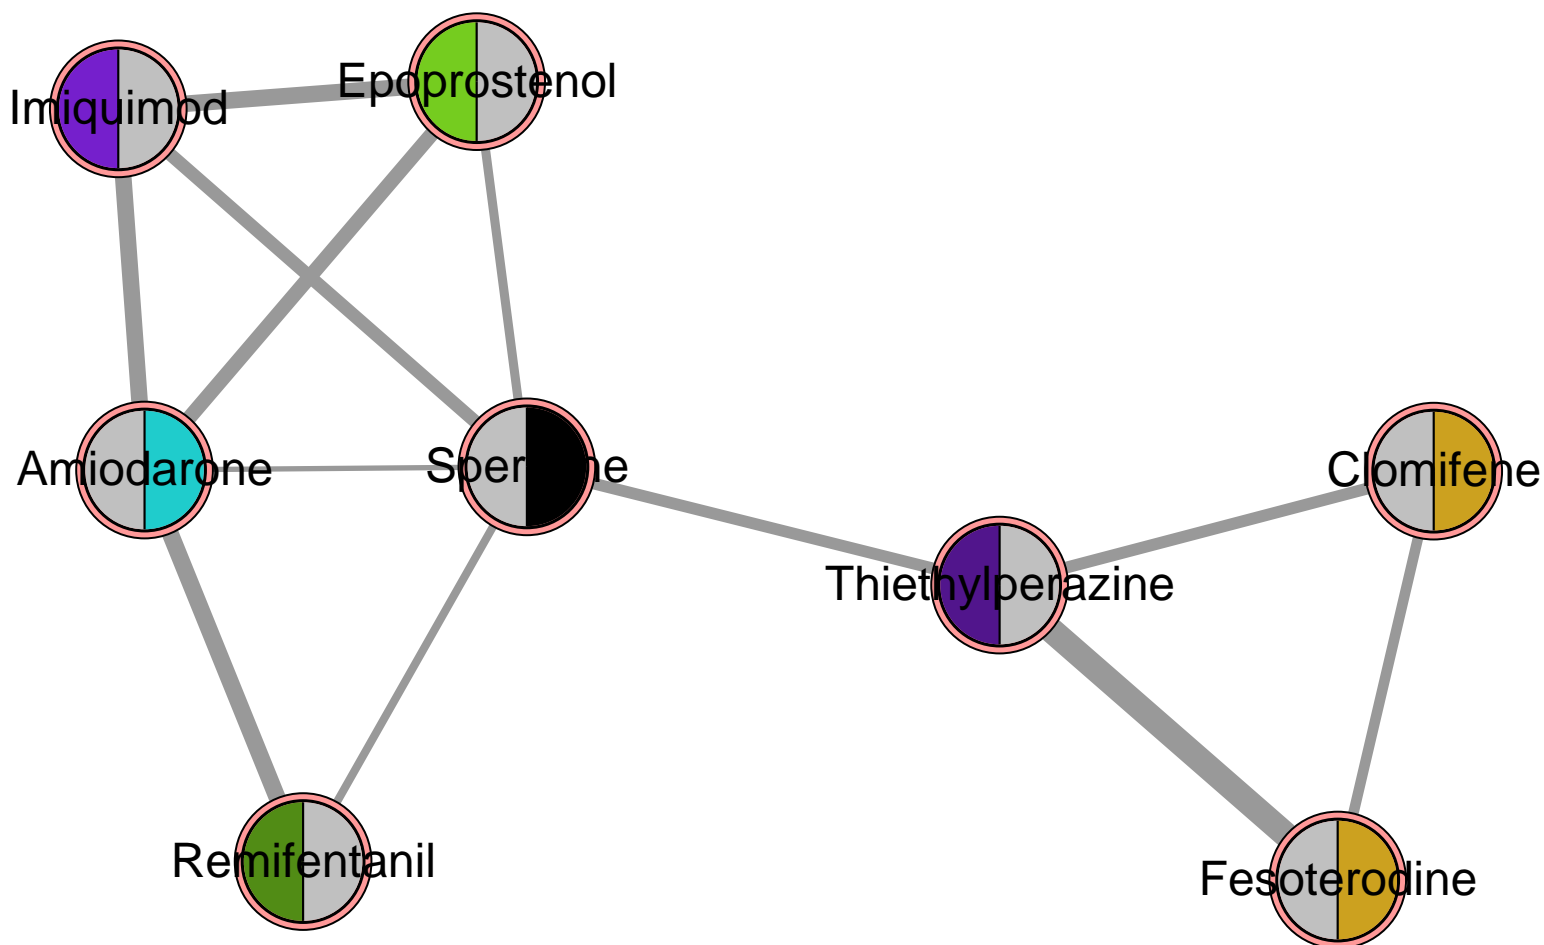

Cluster 21:  
Imiquimod,Thiethylperazine,Fesoterodine,Epoprostenol,Remifentanil,Amiodarone,  
Clomifene,Spermine.

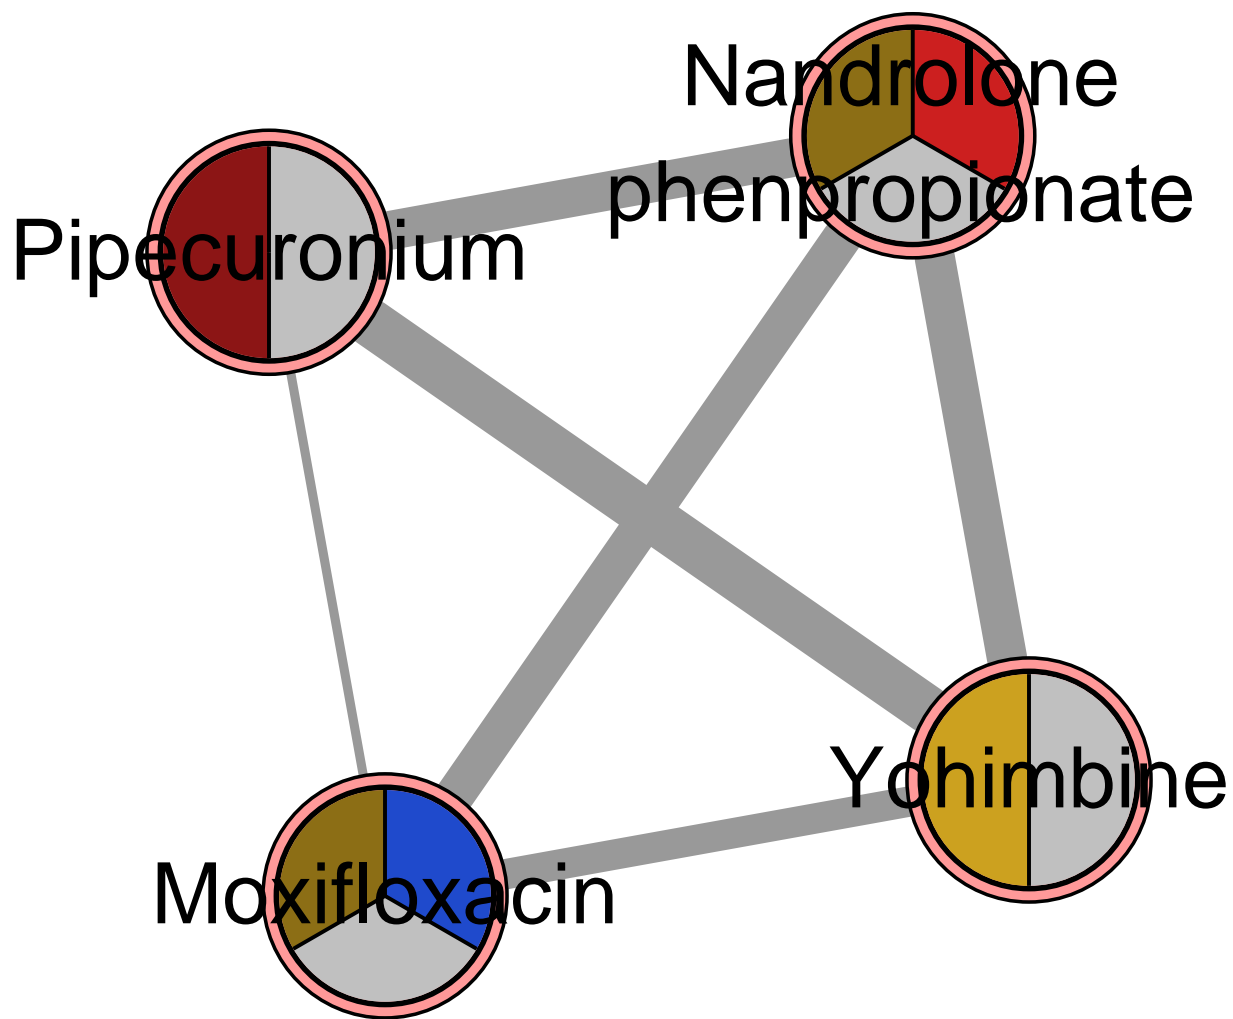

Cluster 22:  
Yohimbine,Nandrolone phenpropionate,Moxifloxacin,Pipecuronium.

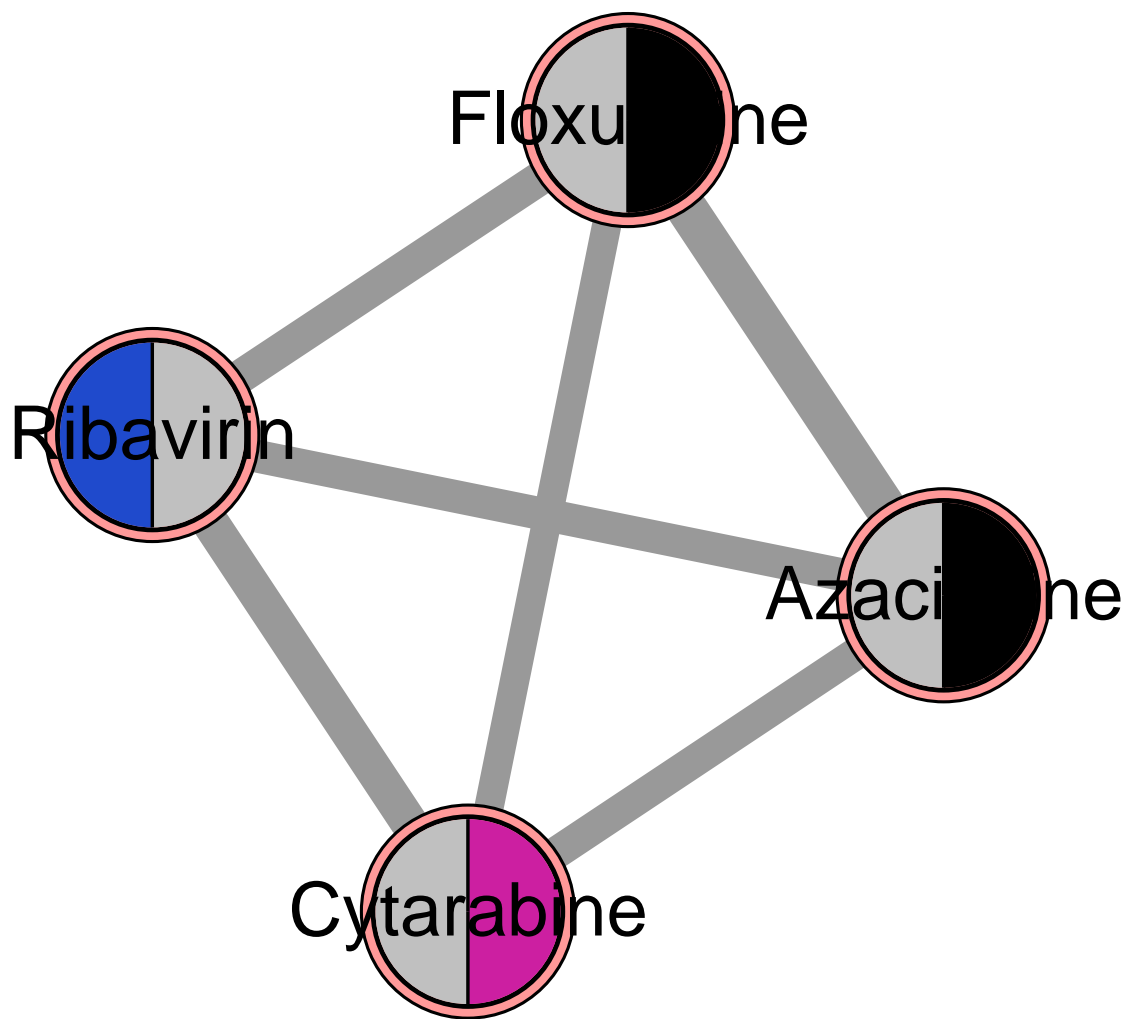

Cluster 23:  
Ribavirin,Azacitidine,Floxuridine,Cytarabine.

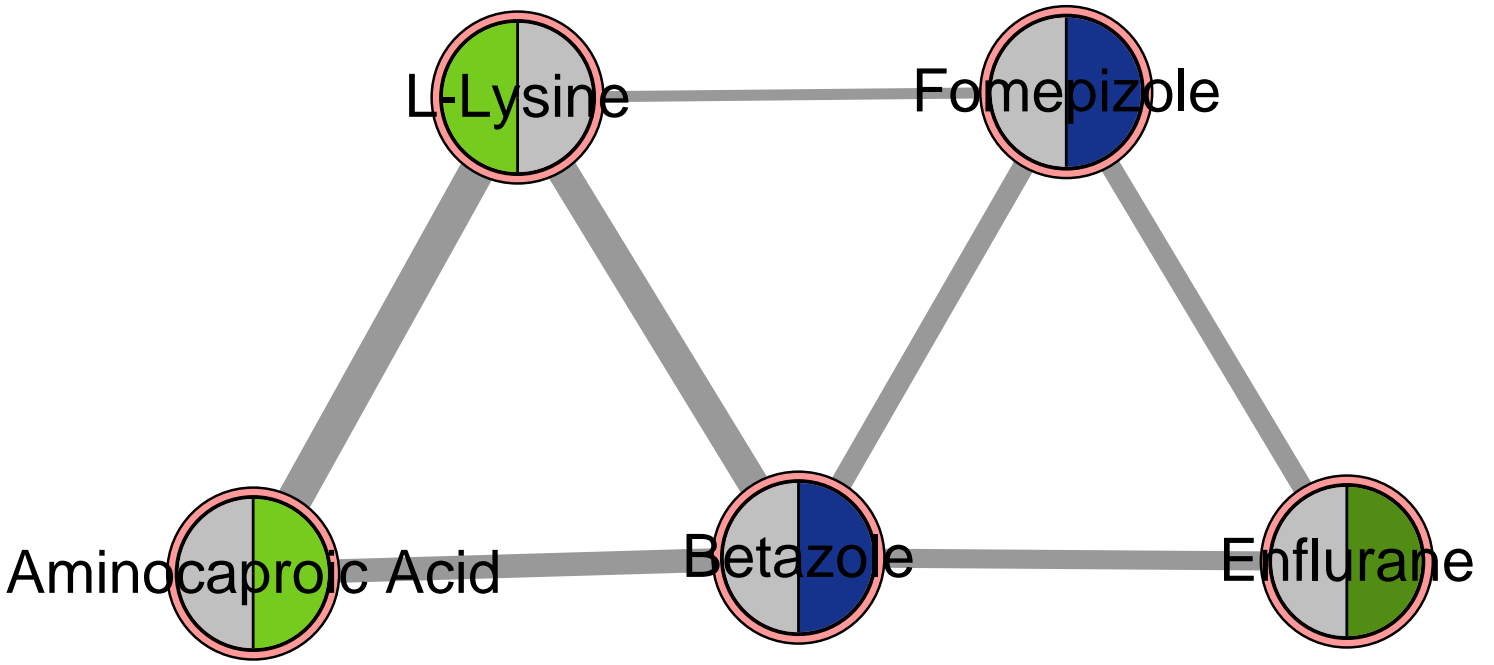

Cluster 24:  
Aminocaproic Acid, Fomepizole, Betazole, L-Lysine, Enflurane.



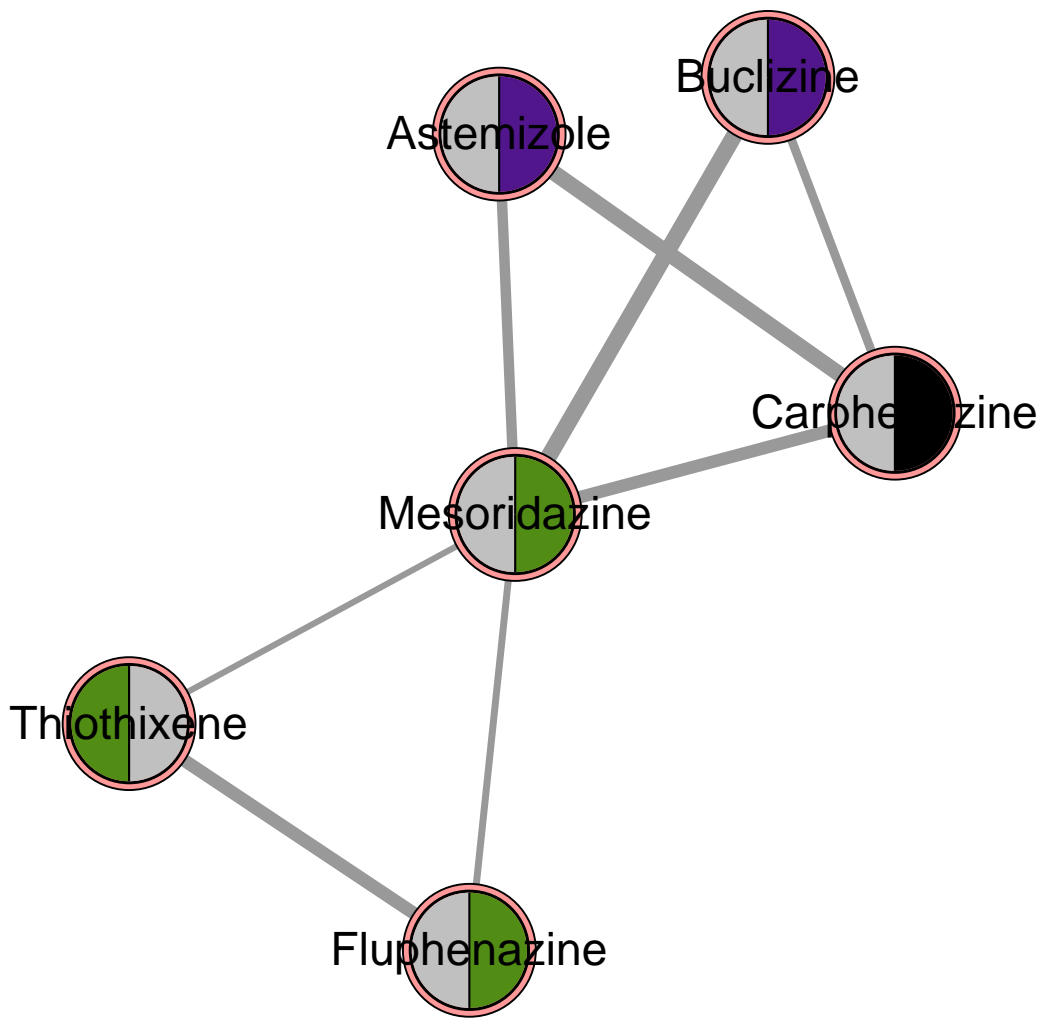

Cluster 25:  
Fluphenazine, Carphenazine, Thiothixene, Buclizine, Astemizole, Mesoridazine.

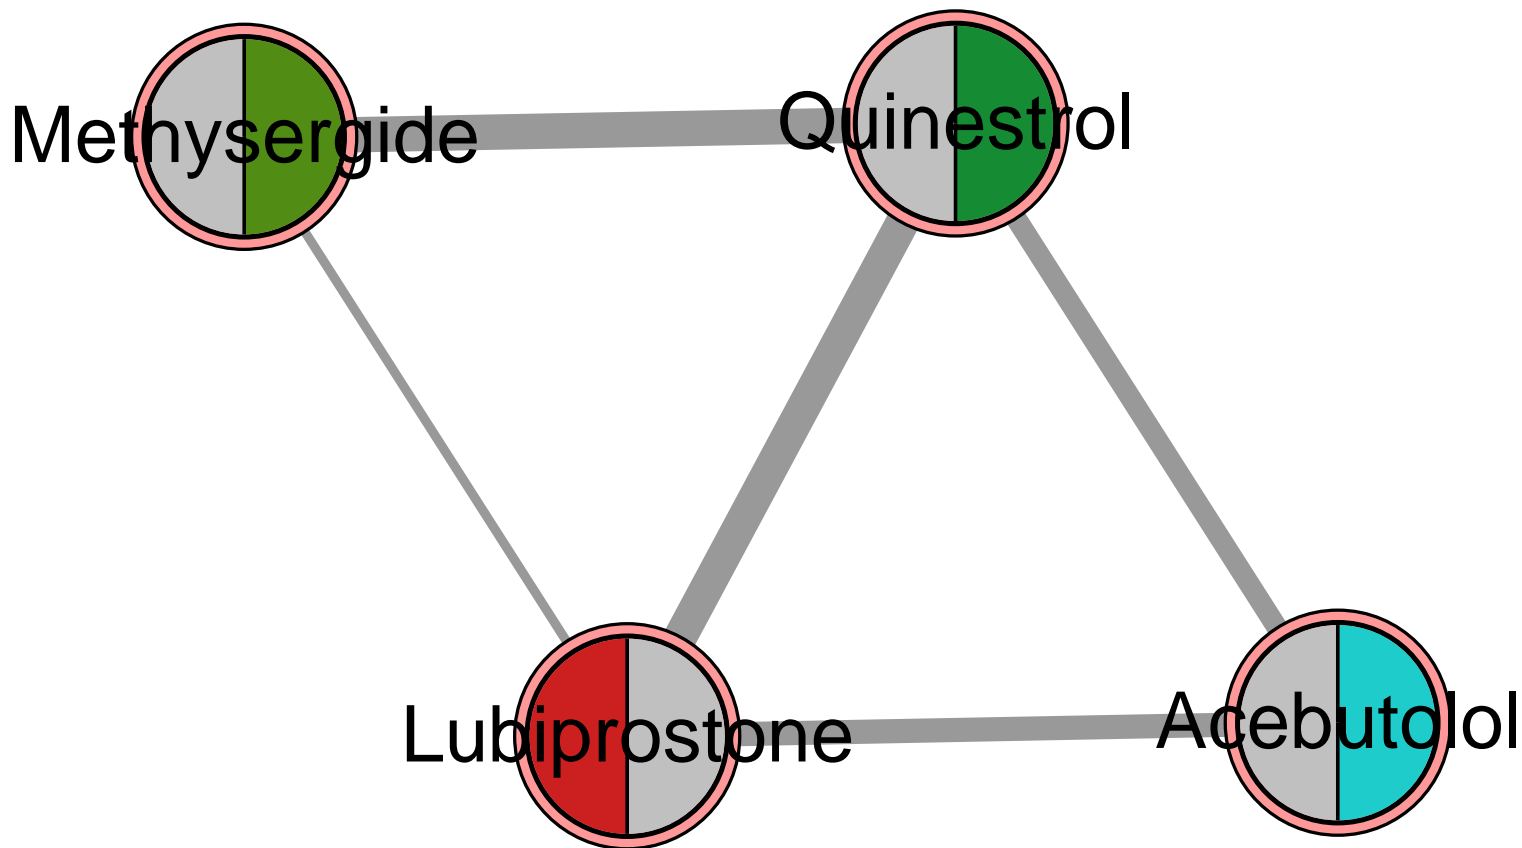

Cluster 26:  
Quinestrol,Lubiprostone,Methysergide,Acebutolol.

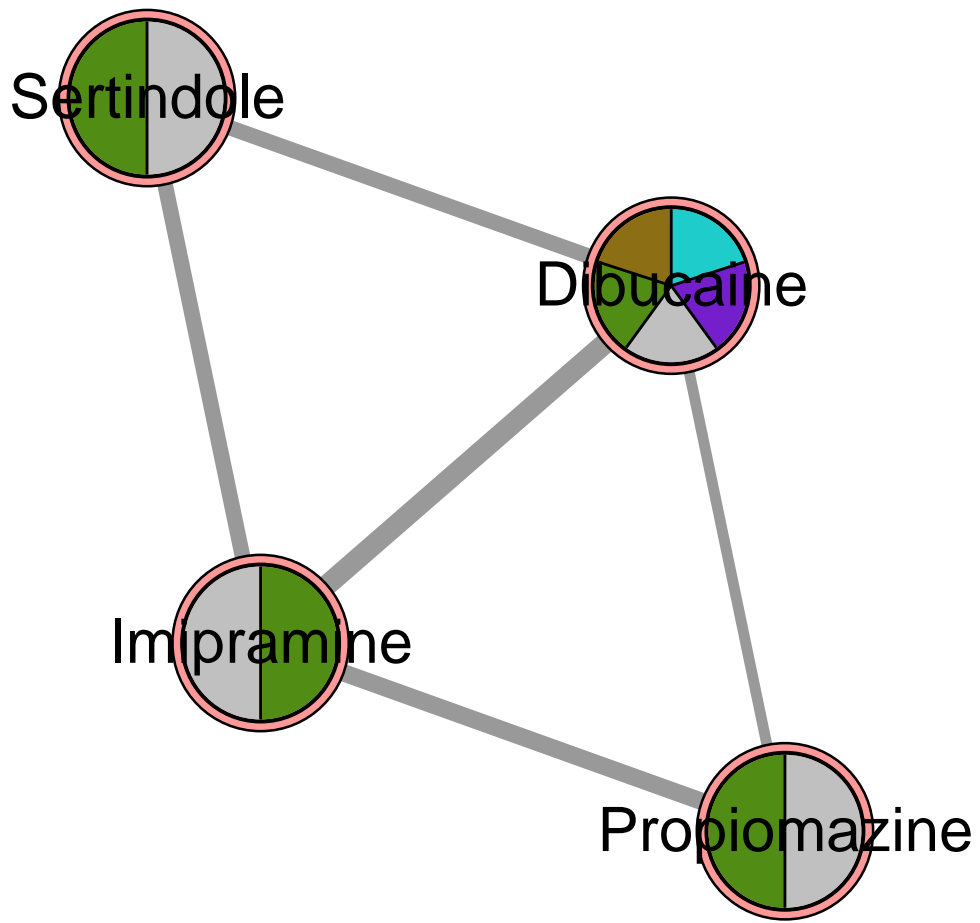

Cluster 27:  
Imipramine,Sertindole,Dibucaine,Propiomazine.

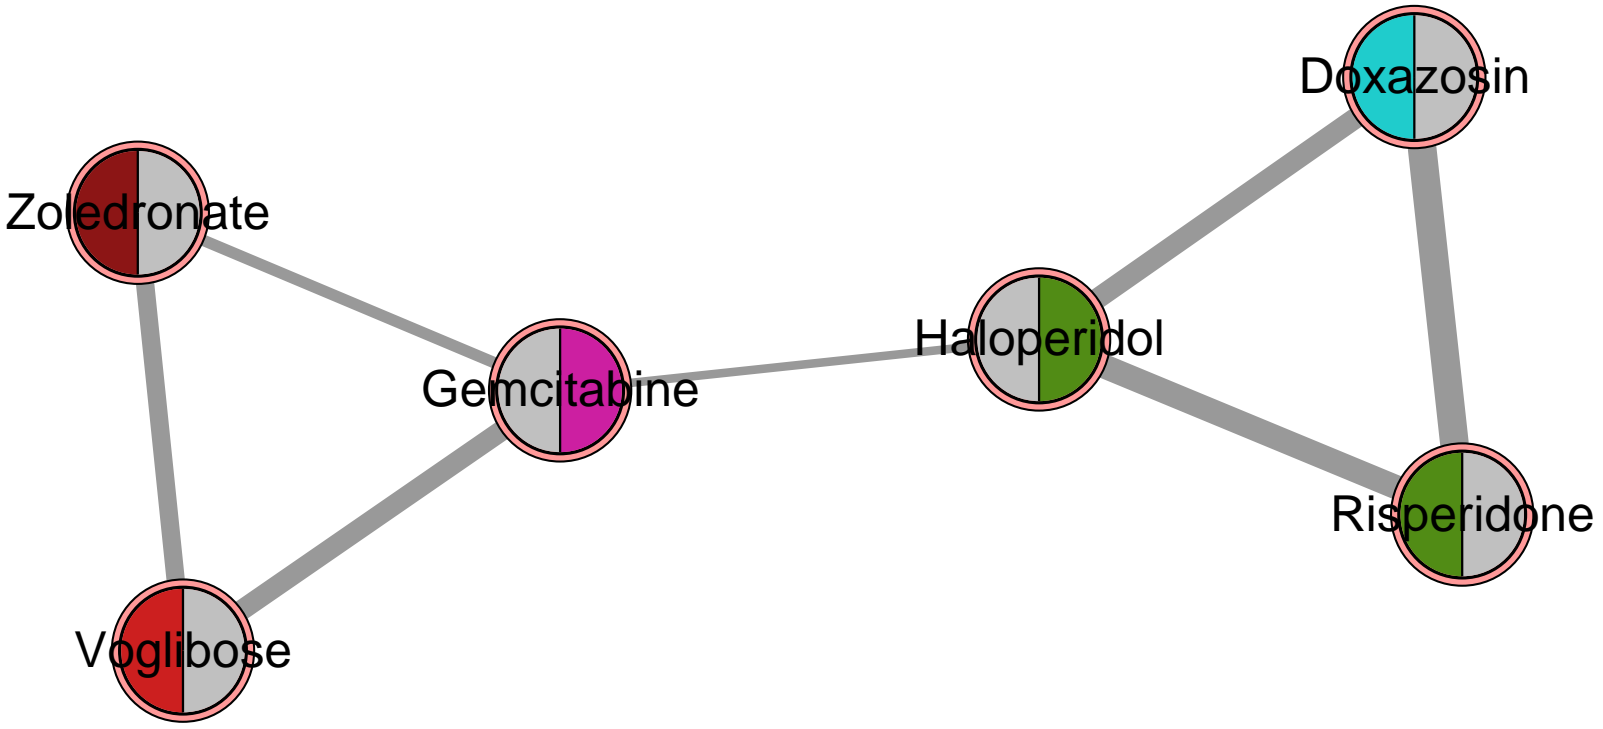

Cluster 28:  
Voglibose, Doxazosin, Gemcitabine, Zoledronate, Haloperidol, Risperidone.

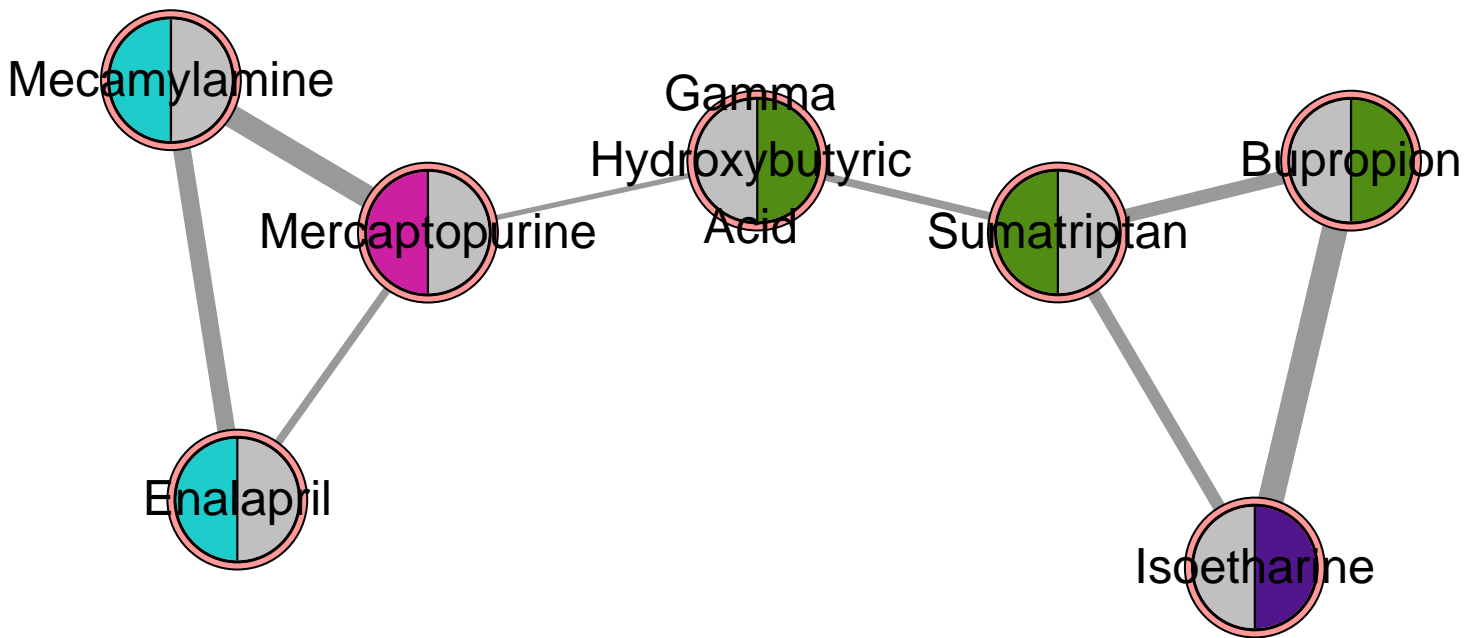

Cluster 29:  
Bupropion, Enalapril, Gamma Hydroxybutyric Acid, Isoetharine, Mecamylamine,  
Mercaptopurine, Sumatriptan.

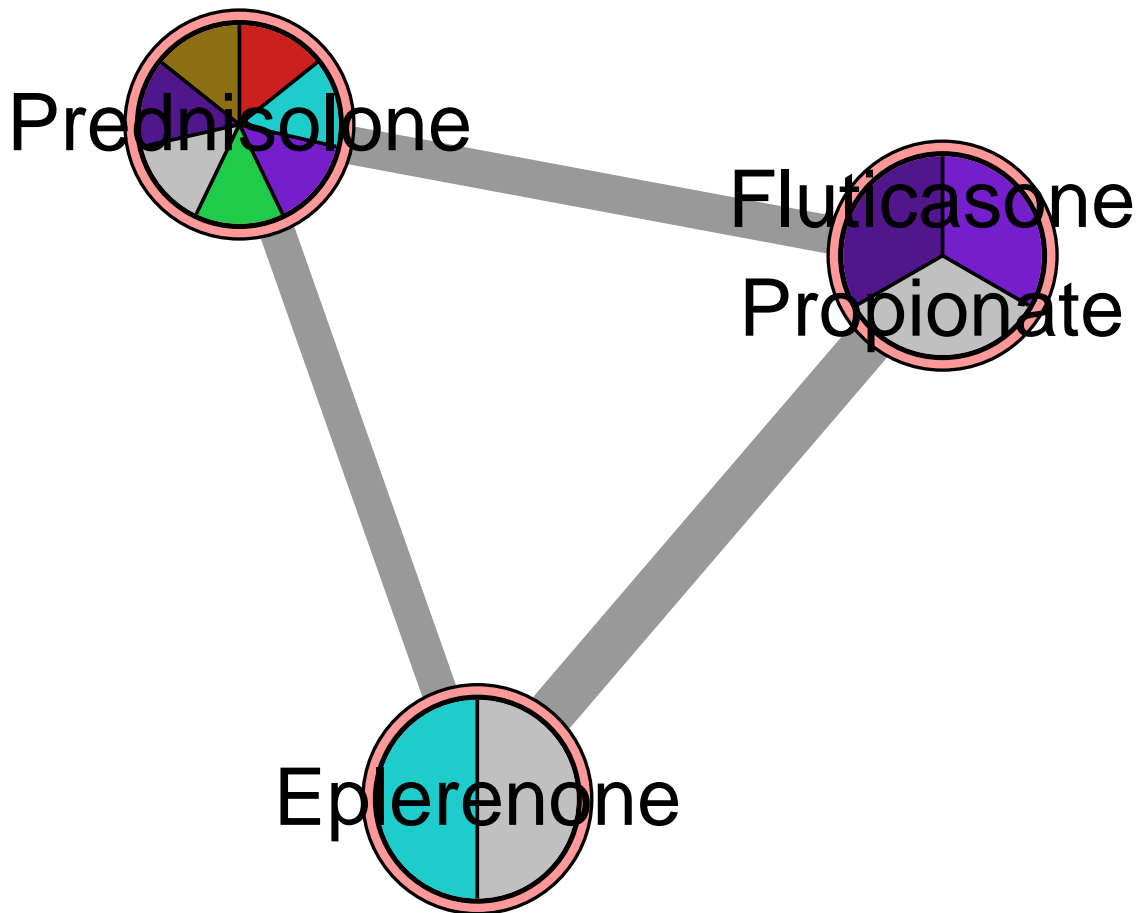

Cluster 30:  
Prednisolone, Fluticasone Propionate, Eplerenone.

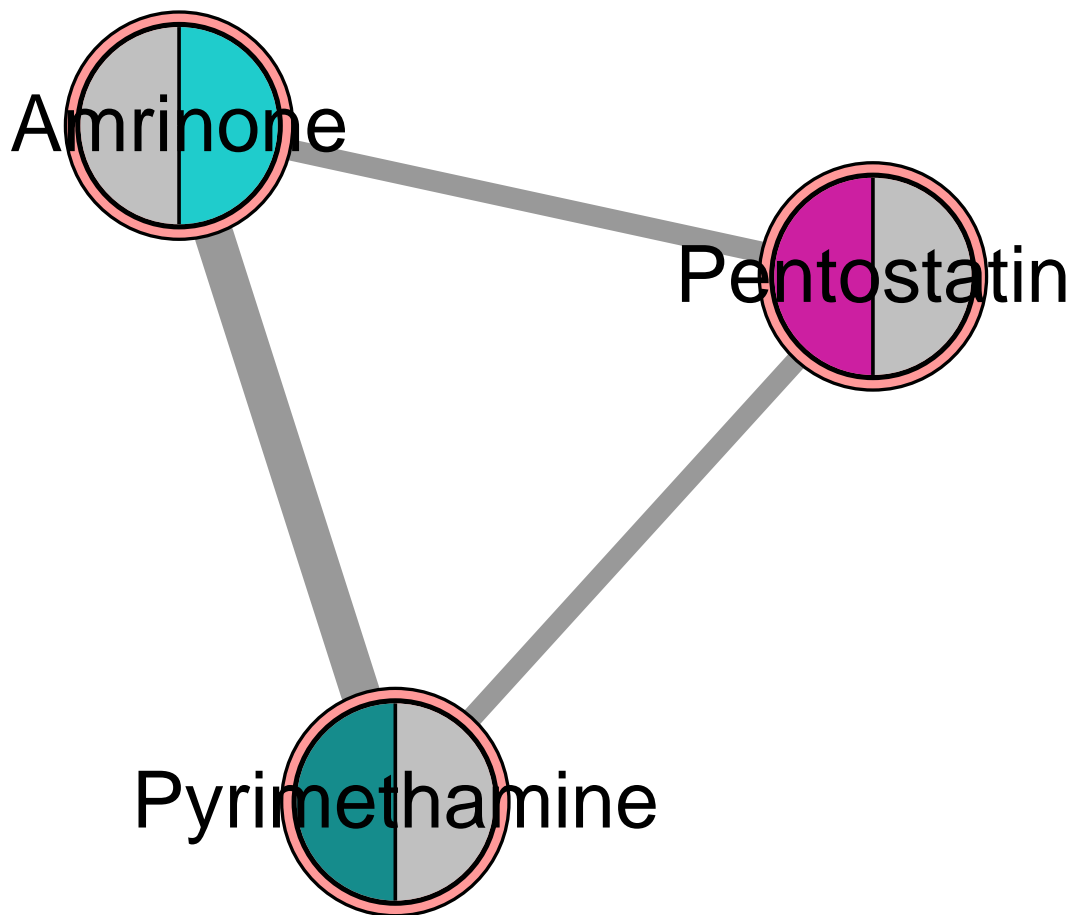

Cluster 31:  
Pyrimethamine, Amrinone, Pentostatin.

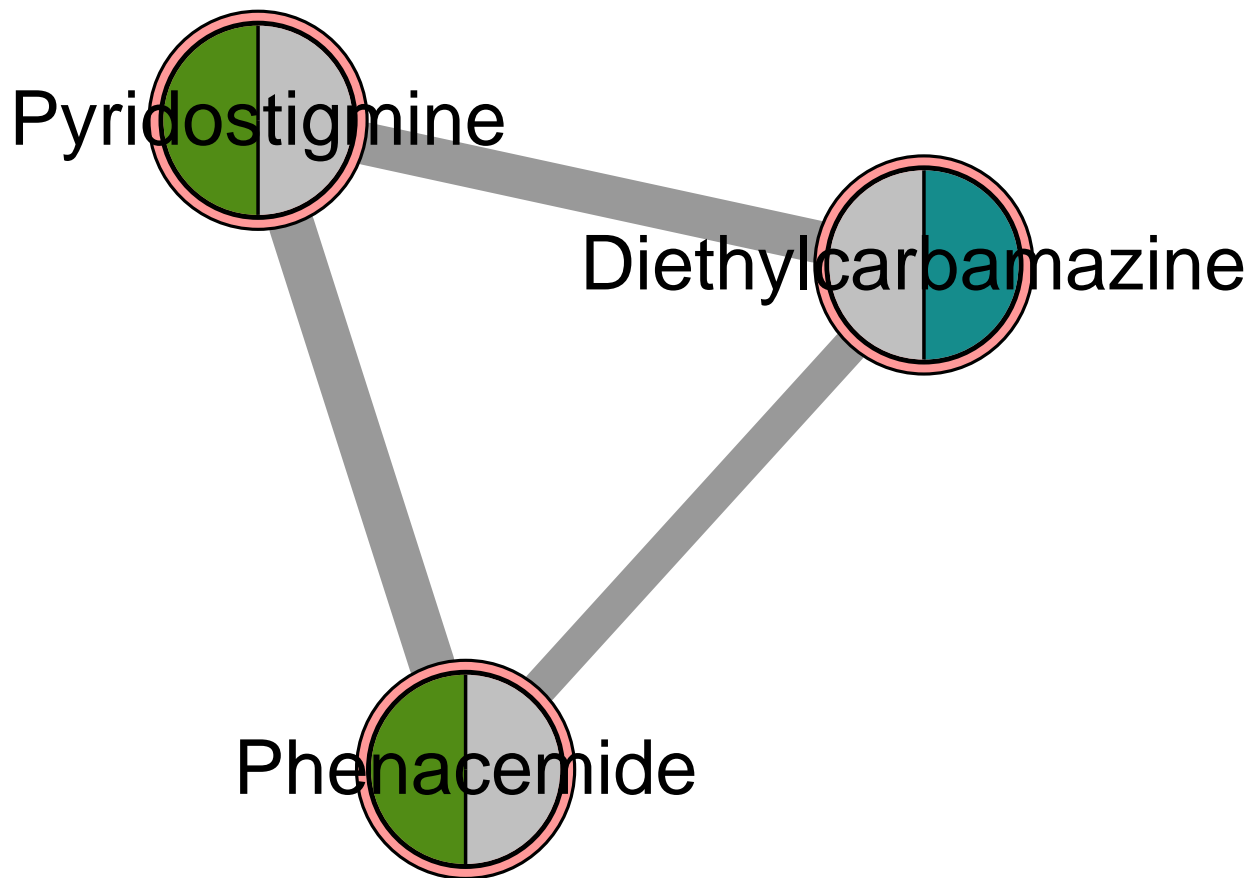

Cluster 32:  
Phenacemide, Pyridostigmine, Diethylcarbamazine.



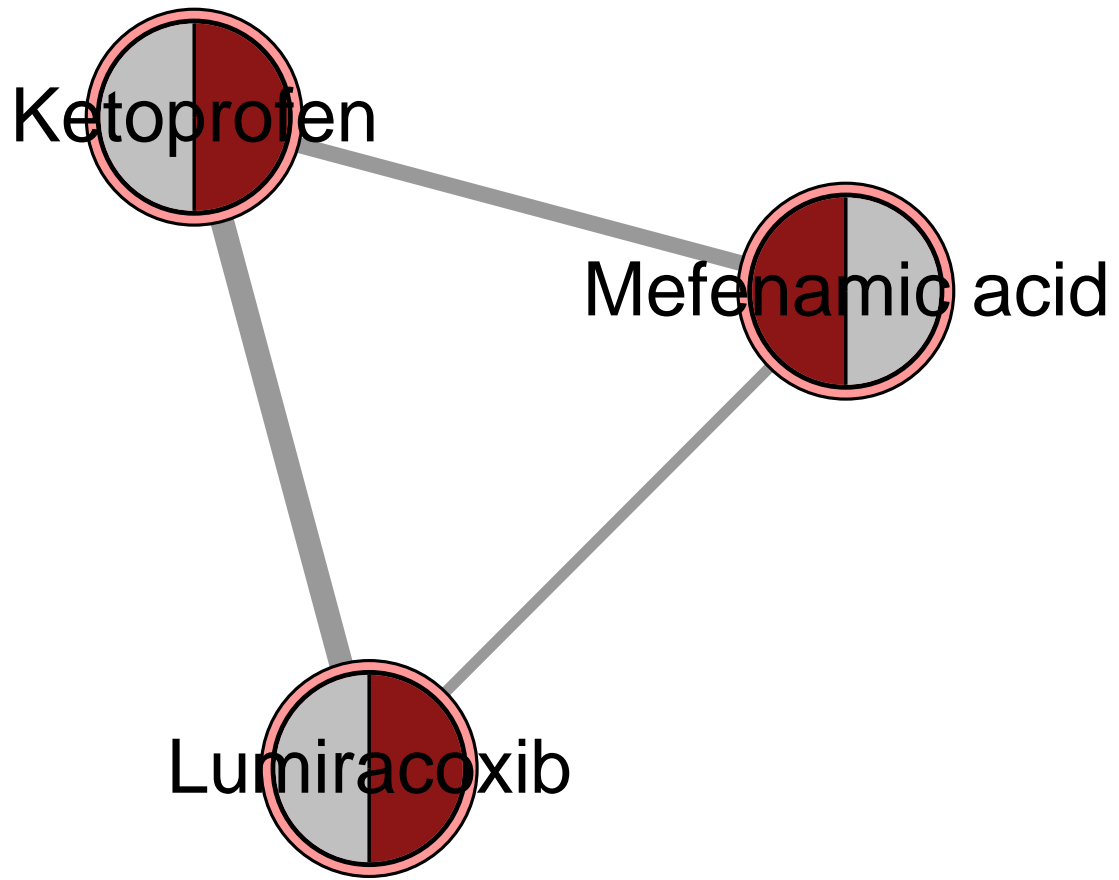

Cluster 33:  
Lumiracoxib, Ketoprofen, Mefenamic acid.

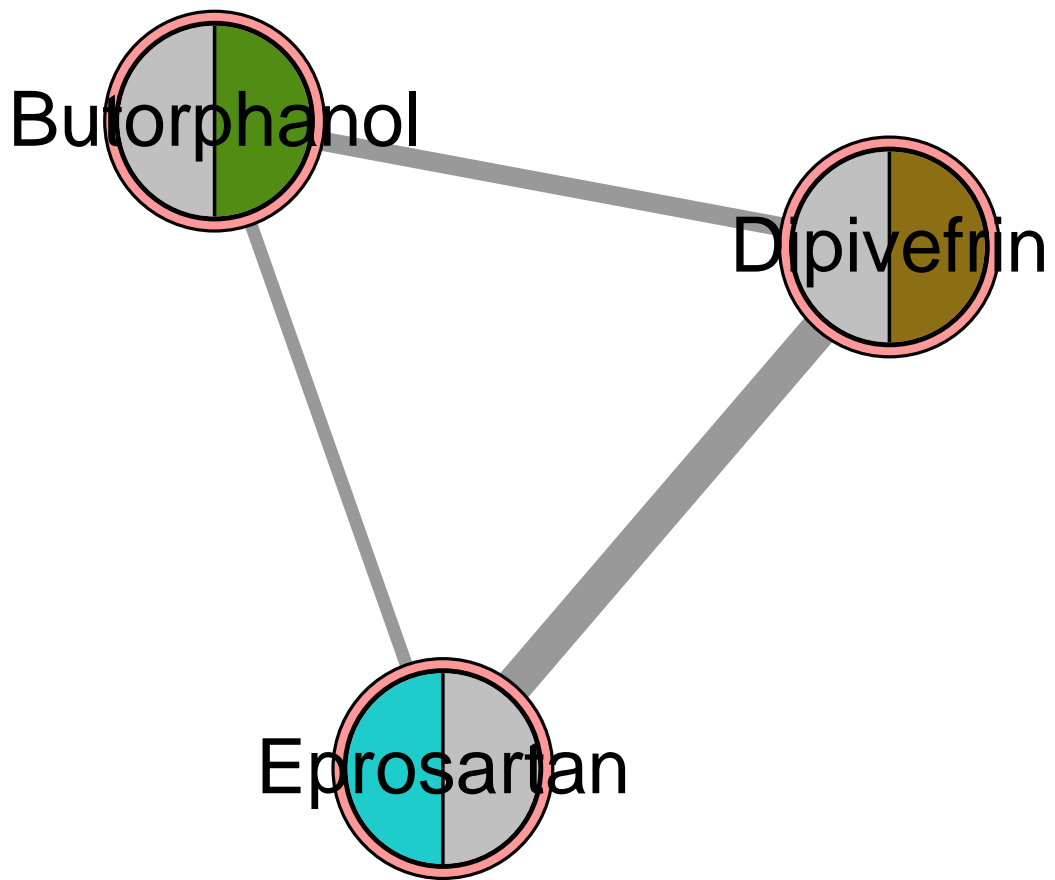

Cluster 34:  
Dipivefrin,Eprosartan,Butorphanol.

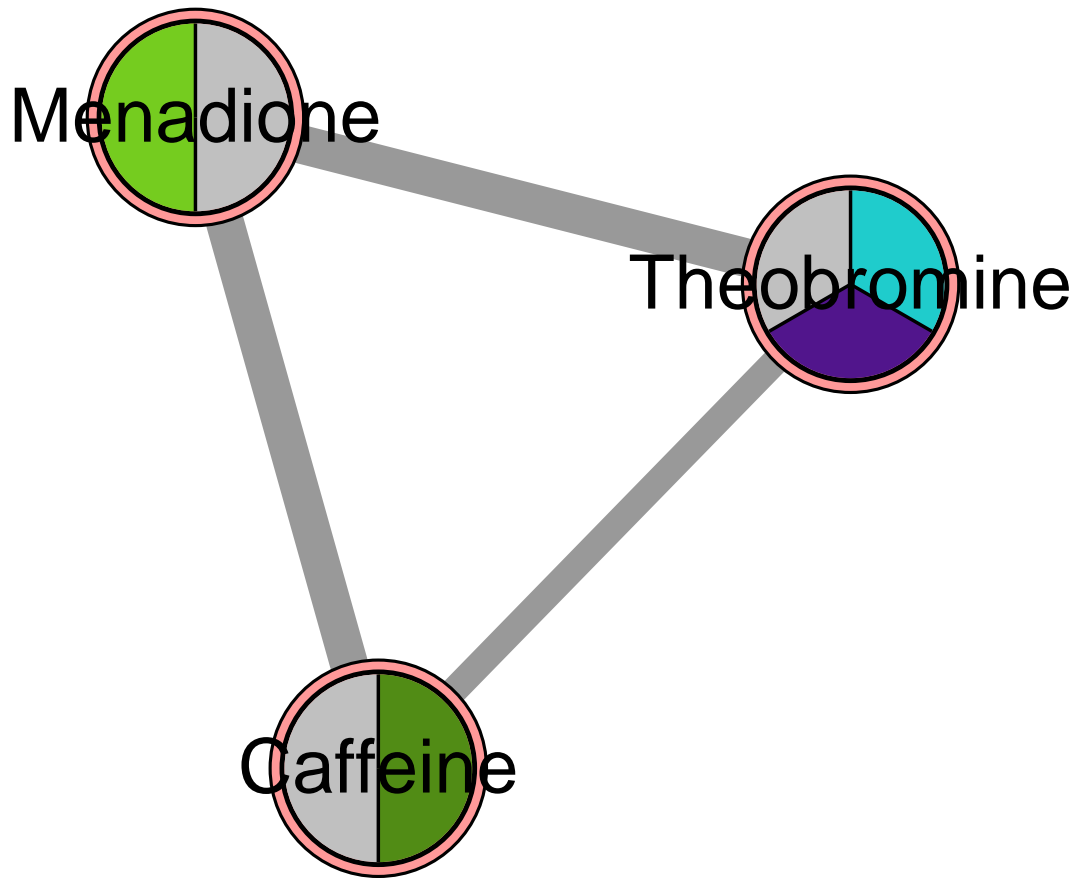

Cluster 35:  
Theobromine, Menadione, Caffeine.

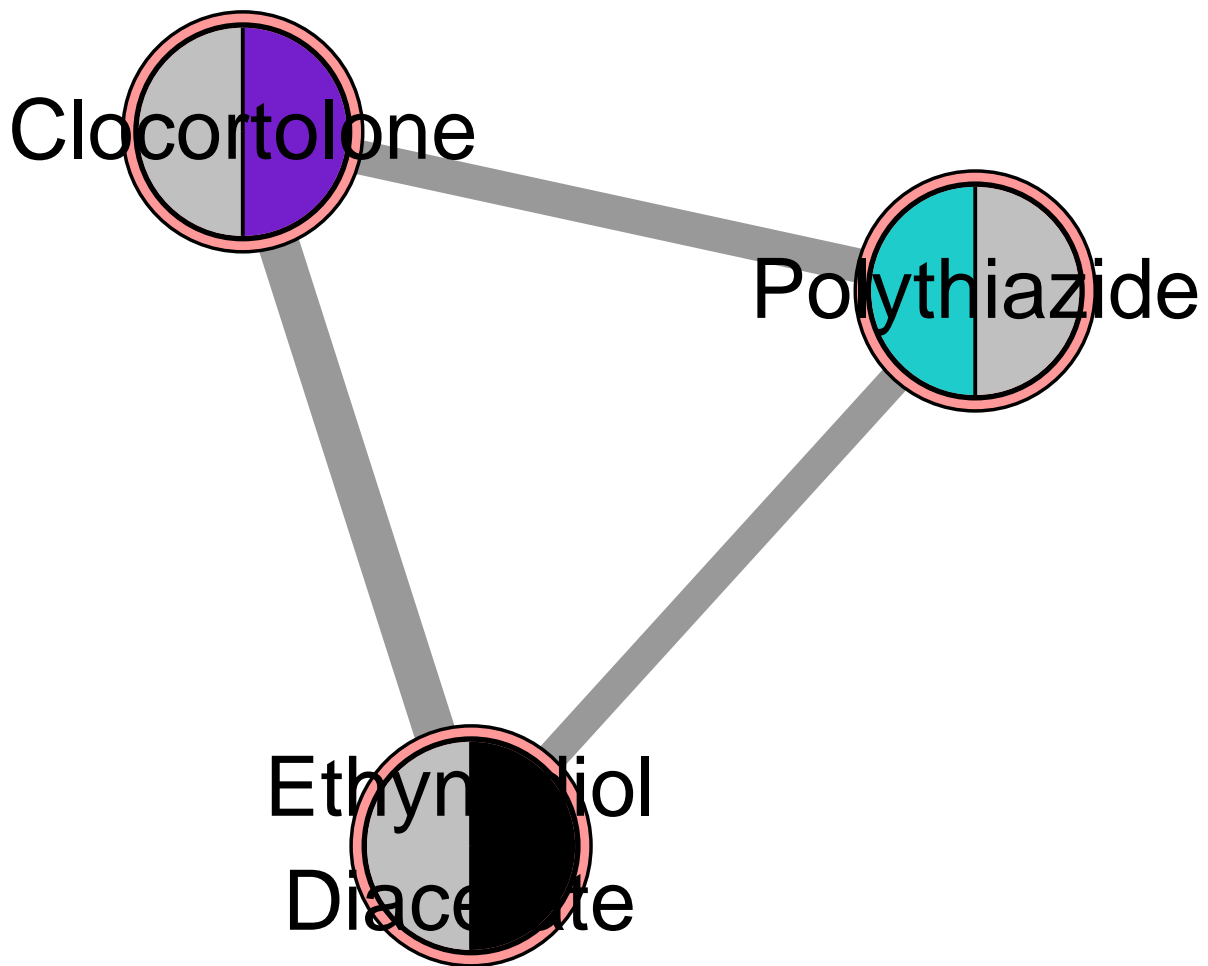

Cluster 36:  
Ethynodiol Diacetate, Polythiazide, Clo cortolone.

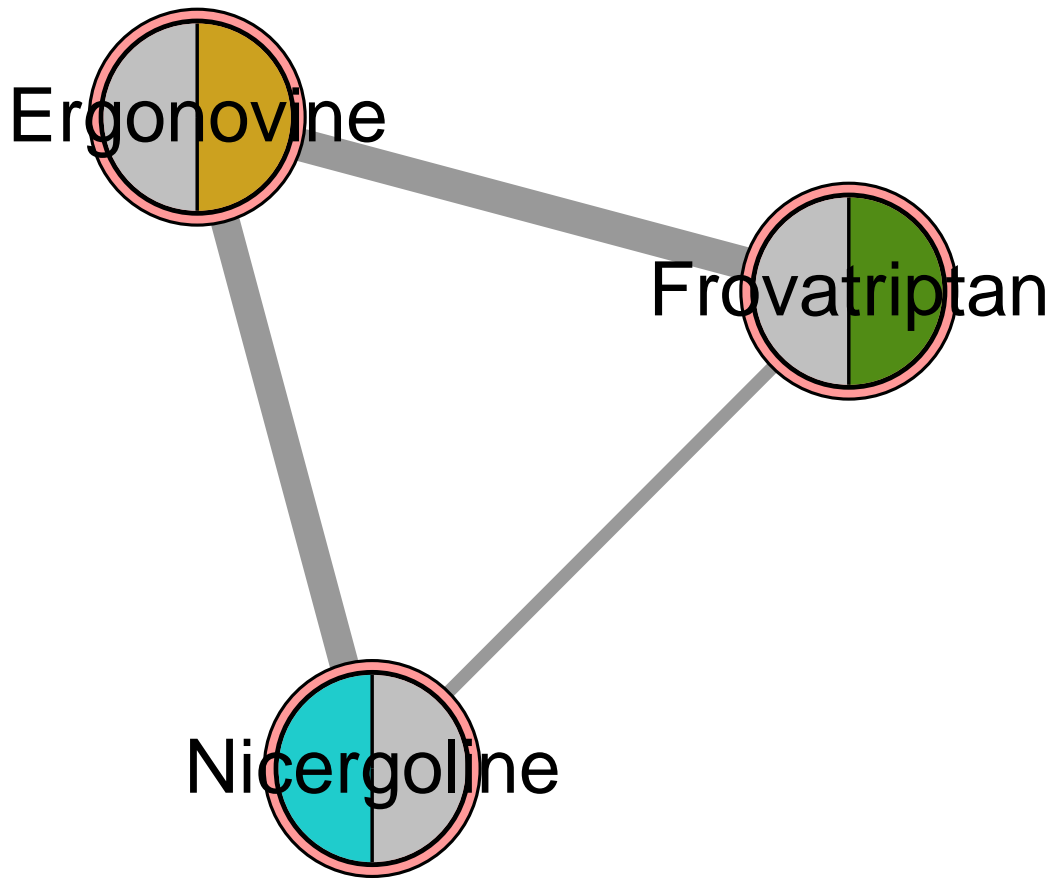

Cluster 37:  
Ergonovine,Nicergoline,Frovatriptan.

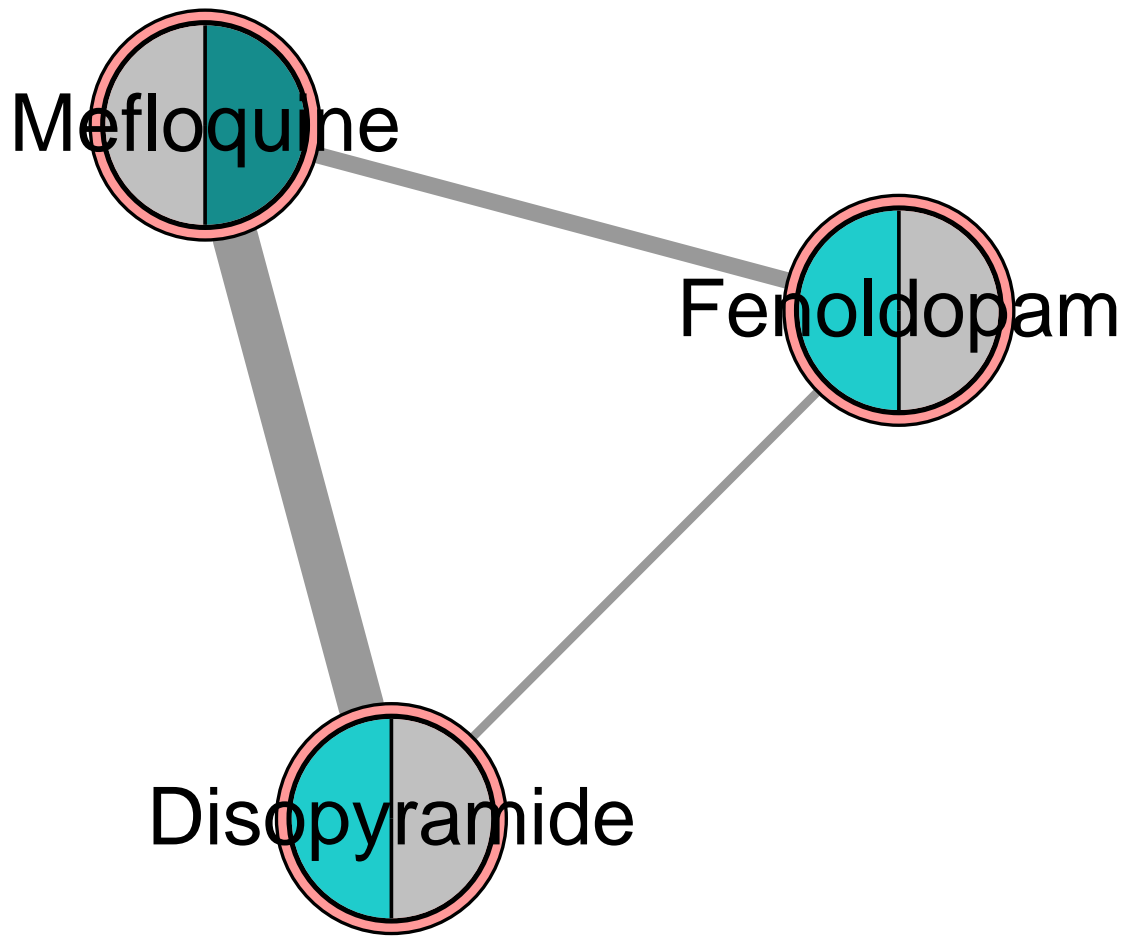

Cluster 38:  
Disopyramide,Fenoldopam,Mefloquine.

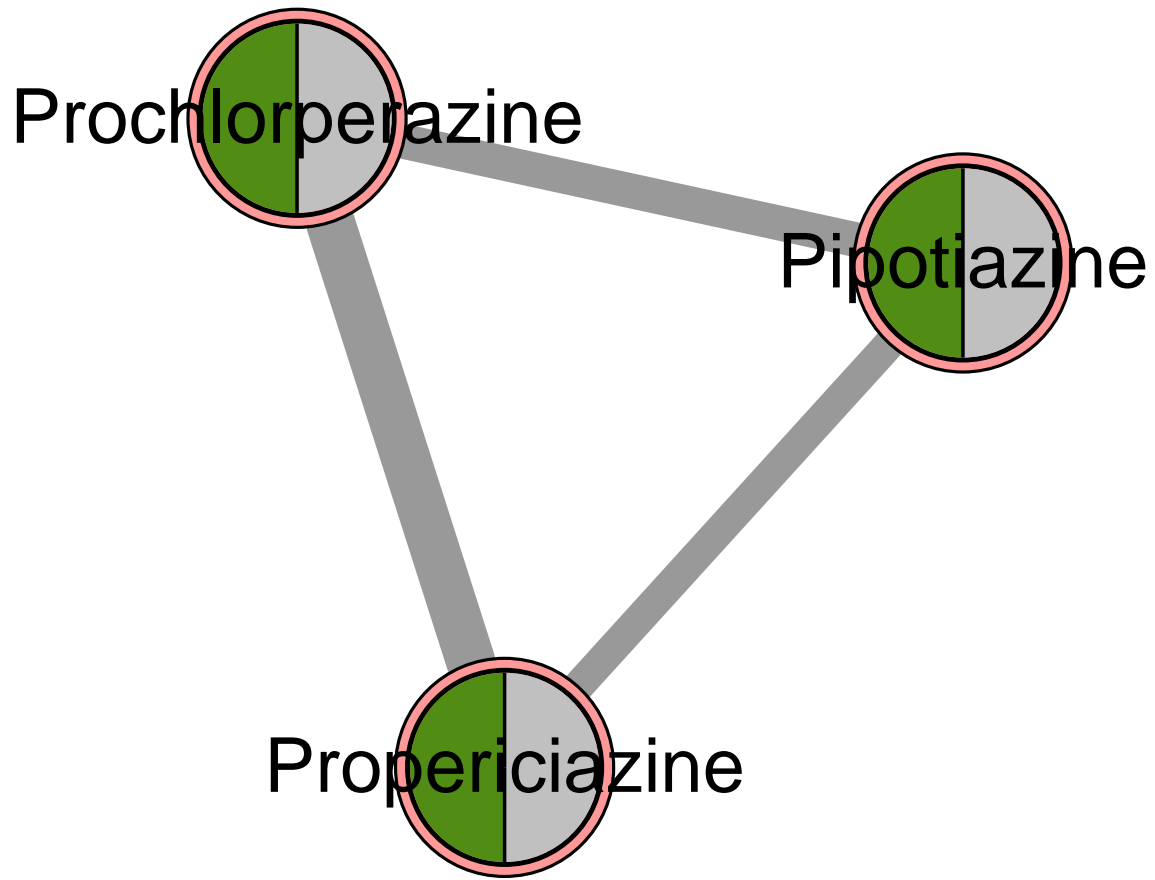

Cluster 39:  
Propericiazine, Pipotiazine, Prochlorperazine

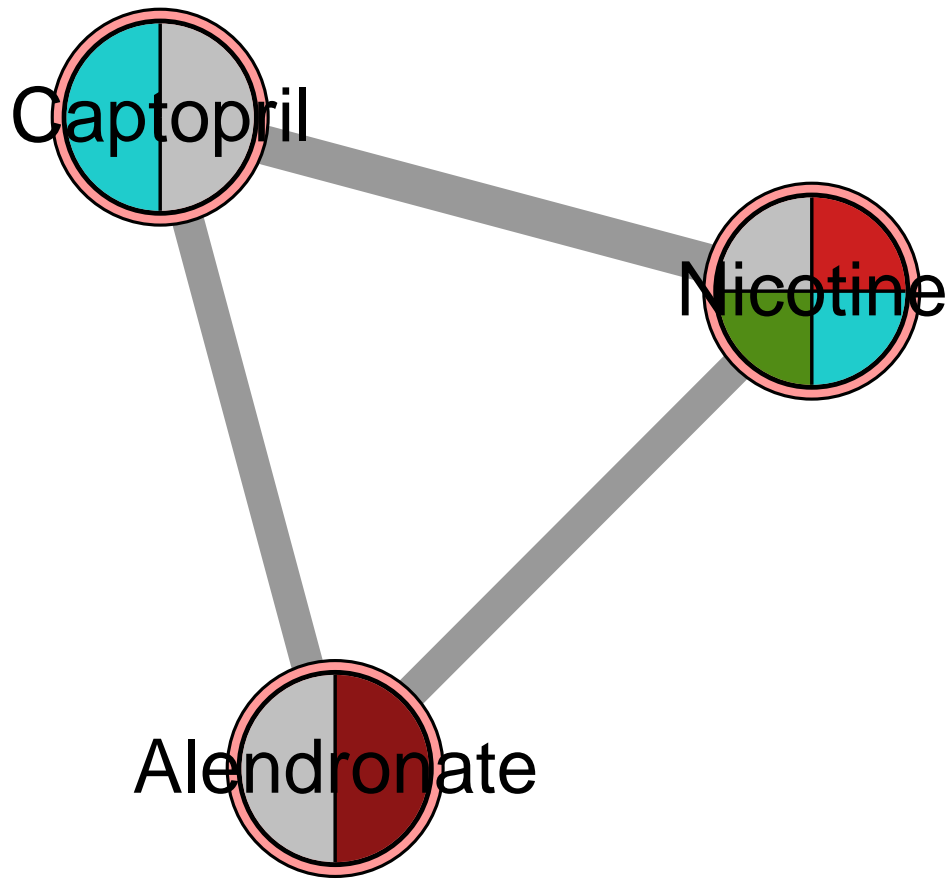

Cluster 40:  
Nicotine, Alendronate, Captopril.



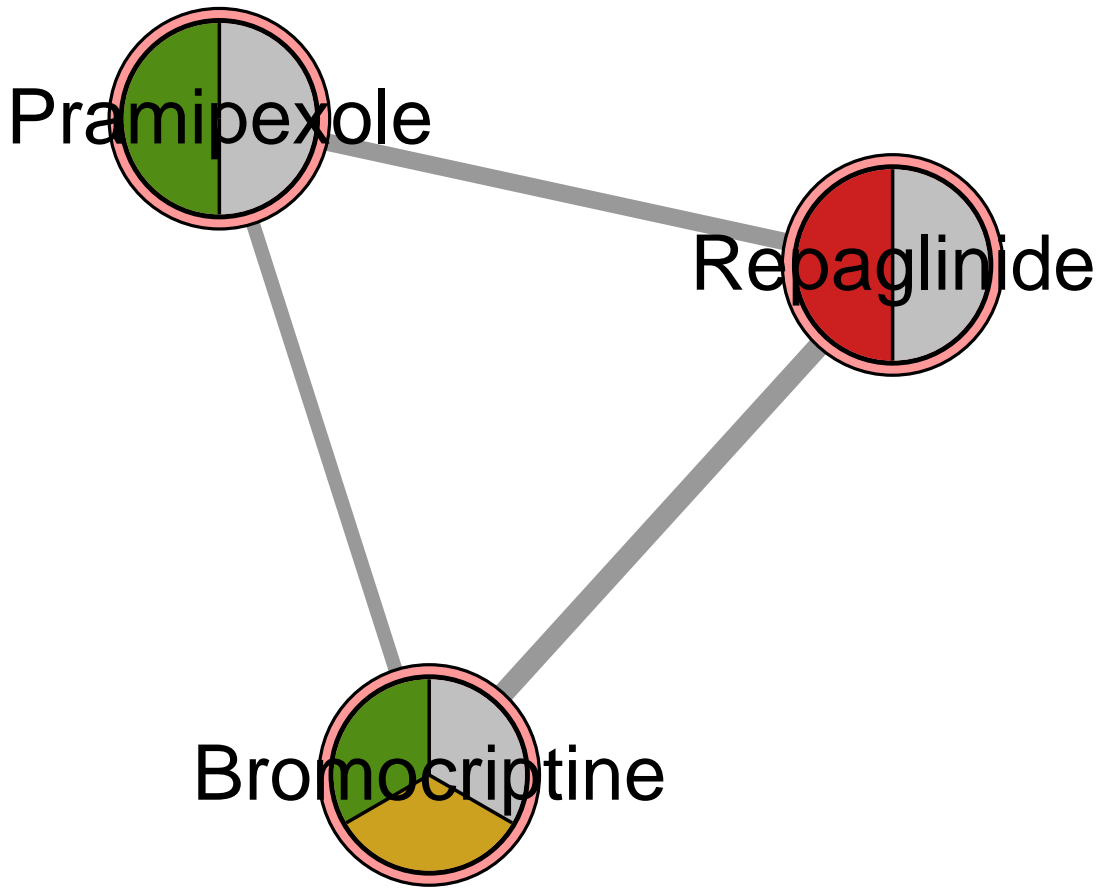

Cluster 41:  
Repaglinide, Pramipexole, Bromocriptine.

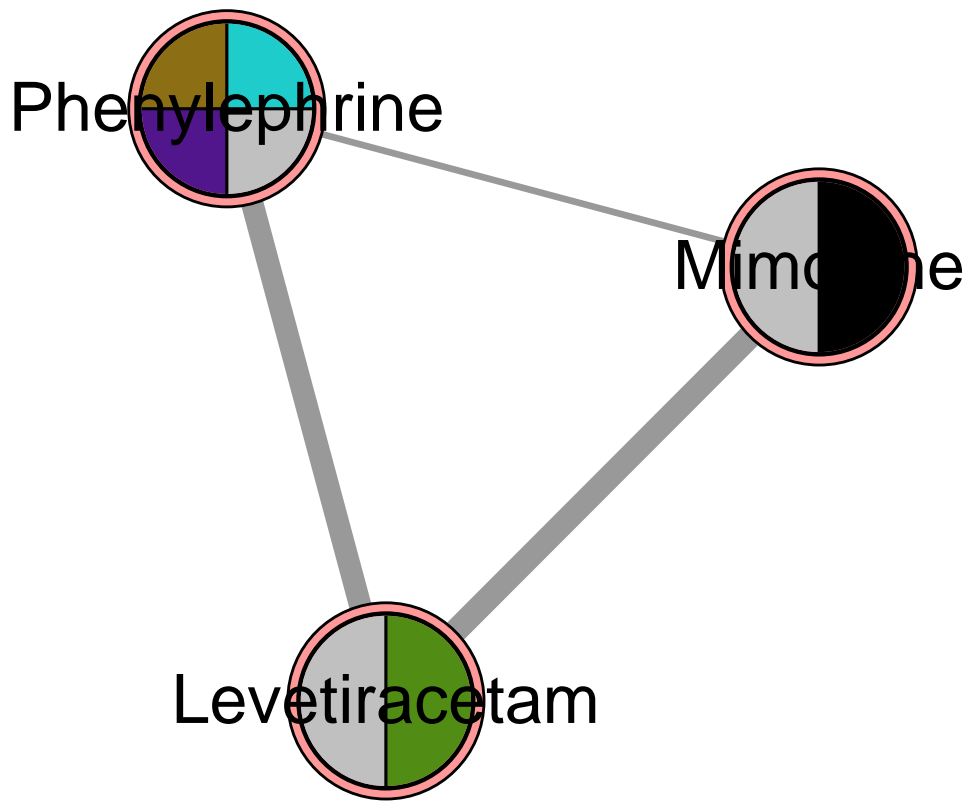

Cluster 42:  
Levetiracetam,Mimosine,Phenylephrine.
