# Supplementary material for: Drug repositioning by applying ‘expression profiles’ generated by integrating chemical structure similarity and gene semantic similarity
Source: Royal Society of Chemistry journal article supplement (doi:10.1039/c3mb70554d), 2014-02-13
Supplement: c3mb70554d6.xlsx [file c3mb70554d6.xlsx]

## Sheet: Sheet1
The 'expression profile' obtained from our study, the first column represented Entrez Gene ID.
Entrez Gene ID\Drugs	Plerixafor	Itraconazole	NADH	Atorvastatin	Ixabepilone	Montelukast	Ximelagatran	Latanoprost	Bosentan	Antrafenine	Tubocurarine	Candoxatril	Bimatoprost	Acarbose	Aprepitant	Fosaprepitant	Metocurine	Metocurine Iodide	Icosapent	Lapatinib	Benzylpenicilloyl Polylysine	Framycetin	Maraviroc	Phosphatidylserine	Alpha-Linolenic Acid	Fulvestrant	Pravastatin	Probucol	Verapamil	Argatroban	Raltitrexed	Moexipril	Tirofiban	Saprisartan	Spirapril	Lisinopril	Reserpine	Rescinnamine	Carboprost Tromethamine	Nilotinib	Leucovorin	Teniposide	Hexafluronium	Nefazodone	Epoprostenol	Pranlukast	Dofetilide	Treprostinil	Pentosan Polysulfate
10971	-0.023942	-0.016009	0.58191	-0.0065739	-0.026177	-0.037679	-0.018013	-0.00020238	0.026839	0.0036274	-0.025847	0.0035748	-0.011212	0.04915	-0.040381	-0.0067918	-0.015778	-0.015778	0.10377	-0.0041969	-0.021319	0.01698	-0.0261	-0.022918	-0.0040958	0.039117	0.01515	-0.039121	0.024598	0.018995	-0.024132	0.010324	0.0031257	-0.077675	-0.049419	-0.029775	-0.036818	-0.02205	-0.0071164	-0.022211	0.0016243	0.03946	0.031765	-0.00032032	0.045206	0.062337	-0.035538	-0.016775	-0.003808
3604	0	0	0	0	0	0	0	0	0	0	0	0	0	0	0	0	0	0	0	0	0	0	0	0	0	0	0	0	0	0	0	0	0	0	0	0	0	0	0	0	0	0	0	0	0	0	0	0	0
8744	-0.018484	-0.01204	0.54677	-0.0070051	-0.015881	-0.033823	-0.013665	0.012059	0.022649	0.0043912	-0.014976	0.013431	-0.0056105	0.048709	-0.039984	-0.013339	-0.018446	-0.018446	0.099296	0.0079812	-0.015716	0.018832	-0.021009	-0.026204	0.0003271	0.040854	0.014537	-0.033893	0.02819	0.013404	-0.016567	0.016932	0.0034121	-0.073013	-0.037468	-0.024826	-0.020395	-0.010207	-0.010226	-0.00986	-0.0015489	0.042755	0.048145	0.0028456	0.038322	0.064399	-0.033562	-0.020429	-0.011323
7128	-0.026006	-0.021561	0.58384	-0.0025837	-0.029399	-0.042666	-0.014218	-0.007147	0.039848	0.0074624	-0.028366	0.0060125	-0.012194	0.051237	-0.038571	-0.0095433	-0.017611	-0.017611	0.10328	-0.0086907	-0.019048	0.020588	-0.019684	-0.014774	-0.0051992	0.042683	0.016399	-0.038715	0.01422	0.02395	-0.029144	0.015143	-0.0057812	-0.077876	-0.048608	-0.011486	-0.04609	-0.030424	0.0020344	-0.020533	0.0011775	0.034318	0.032377	0.0066418	0.0402	0.07146	-0.031913	-0.012155	-1.2e-05
5345	-0.022426	-0.020607	0.58307	-0.0046681	-0.026132	-0.039717	-0.019976	-4.56e-05	0.026686	0.0058397	-0.023667	0.0049958	-0.010945	0.048668	-0.042685	-0.0064509	-0.0165	-0.0165	0.10239	-0.0048496	-0.020806	0.016398	-0.0274	-0.018992	-0.0056184	0.040268	0.01631	-0.038324	0.017737	0.02006	-0.025807	0.011832	-0.0010986	-0.07561	-0.04786	-0.02246	-0.03797	-0.023658	0.00030905	-0.020688	0.0040701	0.042894	0.030741	0.0022847	0.046889	0.070508	-0.033299	-0.010844	-0.00088438
4961	0	0	0	0	0	0	0	0	0	0	0	0	0	0	0	0	0	0	0	0	0	0	0	0	0	0	0	0	0	0	0	0	0	0	0	0	0	0	0	0	0	0	0	0	0	0	0	0	0
10152	-0.021156	-0.019221	0.56948	-0.0061158	-0.021314	-0.031453	-0.019053	0.0054306	0.026168	0.0058598	-0.021689	0.0089293	-0.0068334	0.052054	-0.041205	-0.0071523	-0.016559	-0.016559	0.10726	0.00014069	-0.01688	0.016597	-0.027817	-0.022436	-0.0015493	0.042494	0.017401	-0.034699	0.026032	0.016439	-0.020744	0.012274	0.0045381	-0.072236	-0.042791	-0.02589	-0.028468	-0.017425	-0.0017352	-0.016953	0.0032626	0.044501	0.037485	0.0020012	0.043146	0.075045	-0.035273	-0.011799	-0.004869
25	-0.023369	-0.016863	0.57069	-0.0084575	-0.021642	-0.031	-0.023633	0.0046423	0.025493	0.0072429	-0.022556	0.003958	-0.0057086	0.051742	-0.041456	-0.0069556	-0.016516	-0.016516	0.10346	0.0063737	-0.020984	0.020287	-0.030422	-0.017898	-0.0045138	0.040255	0.016434	-0.042978	0.01711	0.01603	-0.023454	0.019455	0.0042112	-0.076508	-0.045599	-0.02303	-0.031345	-0.018082	0.0025993	-0.0089035	0.0052012	0.044455	0.030347	-0.0011182	0.0461	0.078997	-0.038091	-0.010867	0.014482
427	-0.036922	-0.023877	0.74792	-0.022289	-0.025102	-0.057945	-0.013083	-0.036104	0.02778	0.010987	-0.028712	-0.0051313	0.0020275	0.053721	-0.035186	-0.017386	-0.0070092	-0.0070092	0.12373	-0.018369	-0.021838	0.034294	-0.015326	-0.028783	-0.0069111	0.038086	0.0052043	-0.049325	-0.015238	0.018623	-0.03534	-0.0012026	-0.016998	-0.092577	-0.052576	-0.020221	-0.057103	-0.039478	-0.004892	-0.032651	-0.0047314	0.021274	0.03698	0.013817	0.023028	0.041382	-0.036627	-0.024169	-0.021979
31	-0.024757	-0.018963	0.59439	-0.0060667	-0.028299	-0.039018	-0.020932	-0.0035273	0.02707	0.0046161	-0.025944	0.0028128	-0.0096377	0.05003	-0.041745	-0.0051164	-0.015232	-0.015232	0.10859	-0.0060791	-0.021439	0.017261	-0.02685	-0.021124	-0.0010279	0.040184	0.014541	-0.038616	0.018031	0.020025	-0.026063	0.0099234	0.0027655	-0.076253	-0.051187	-0.026793	-0.039466	-0.024324	-0.0027322	-0.02388	0.0044694	0.041431	0.028246	0.00018444	0.045602	0.066816	-0.034619	-0.014421	-0.00019815
1145	-0.0099793	-0.0060413	0.31543	-0.020355	-0.051292	-0.069782	-0.0082791	-0.069974	0.039493	-0.014798	-0.049376	-0.0054111	-0.045976	-0.021146	-0.067096	-0.00092498	-0.012389	-0.012389	0.1304	0.011698	-0.039254	0.020352	-0.02291	-0.014989	0.0081772	0.053447	0.033808	-0.063392	0.0098885	0.041039	-0.07049	-0.035438	-0.048226	-0.15094	-0.061445	-0.033688	-0.084581	-0.035423	-0.044913	-0.017473	-0.04645	0.012138	0.027669	0.029023	0.099929	-0.026388	-0.028825	-0.016382	-0.010244
9457	0	0	0	0	0	0	0	0	0	0	0	0	0	0	0	0	0	0	0	0	0	0	0	0	0	0	0	0	0	0	0	0	0	0	0	0	0	0	0	0	0	0	0	0	0	0	0	0	0
71	-0.022388	-0.018448	0.58812	-0.0067744	-0.025956	-0.039024	-0.018567	-0.0014893	0.027287	0.0033988	-0.025252	0.0033559	-0.010336	0.049136	-0.04191	-0.0062343	-0.015642	-0.015642	0.10454	-0.0037249	-0.021356	0.017122	-0.02659	-0.021622	-0.0050565	0.040337	0.015277	-0.039416	0.020444	0.019778	-0.026181	0.0097023	0.0035312	-0.077077	-0.048959	-0.027584	-0.038471	-0.023677	-0.0049088	-0.02269	0.0018842	0.040565	0.031571	0.00042748	0.046596	0.064683	-0.03477	-0.015187	-0.0030129
87	-0.02344	-0.015644	0.57684	-0.0059606	-0.02487	-0.037043	-0.017543	0.0019197	0.026695	0.0045552	-0.024456	0.0052179	-0.010943	0.049245	-0.04059	-0.0071366	-0.016328	-0.016328	0.10247	-0.0032065	-0.020209	0.017146	-0.025391	-0.022603	-0.0036022	0.039675	0.015744	-0.038491	0.024651	0.018732	-0.023259	0.01184	0.0025624	-0.076702	-0.047497	-0.027899	-0.034748	-0.020639	-0.0057895	-0.020743	0.0015771	0.039882	0.033628	0.00020313	0.045505	0.064321	-0.035271	-0.015833	-0.0034843
8202	-0.022109	-0.020221	0.58285	-0.0052554	-0.023614	-0.034832	-0.018816	0.0018341	0.02808	0.0060421	-0.023288	0.0058589	-0.009035	0.051129	-0.040715	-0.0048197	-0.015608	-0.015608	0.10281	-0.0036935	-0.019292	0.017694	-0.025715	-0.021031	-0.0045007	0.04032	0.018146	-0.035751	0.021546	0.020329	-0.023732	0.011845	0.002833	-0.072771	-0.045471	-0.022449	-0.034375	-0.021362	0.0016803	-0.021813	0.0046025	0.042643	0.031599	0.001085	0.047292	0.072381	-0.035133	-0.011977	0.00084184
8038	-0.026477	-0.018149	0.58619	-0.0031414	-0.027973	-0.039764	-0.01531	-0.0044331	0.031757	0.0043149	-0.026487	0.0098419	-0.012315	0.054612	-0.040169	-0.0085372	-0.016126	-0.016126	0.1039	-0.0068596	-0.020825	0.017867	-0.022879	-0.020199	-0.0044757	0.040905	0.013783	-0.039394	0.01916	0.02165	-0.027528	0.017853	-0.00069066	-0.078141	-0.044764	-0.016642	-0.039576	-0.023496	-0.0020705	-0.019496	0.0004111	0.03812	0.033429	0.0013905	0.042672	0.064553	-0.035308	-0.015858	-0.0026011
4303	-0.021198	-0.025331	0.58109	-0.00403	-0.022011	-0.031172	-0.021179	0.0043364	0.028803	0.0062306	-0.02238	0.0096945	-0.0033478	0.054963	-0.041939	-0.0037374	-0.016342	-0.016342	0.11341	-0.00078083	-0.016355	0.015193	-0.029311	-0.019037	-0.0014834	0.04492	0.020626	-0.031609	0.023793	0.018092	-0.022689	0.011391	0.0045173	-0.06832	-0.042401	-0.020036	-0.029916	-0.019344	0.0066207	-0.019988	0.0068915	0.046526	0.034061	0.0031753	0.047311	0.084715	-0.034831	-0.0028955	-0.00067177
185	-0.019911	-0.013909	0.52445	-0.0071484	-0.023399	-0.038619	-0.012835	0.0024324	0.03582	0.0092501	-0.020546	0.011857	-0.013894	0.053843	-0.042329	-0.0052433	-0.0084413	-0.0084413	0.10301	0.0047905	-0.014397	0.020426	-0.014945	-0.024896	0.0064777	0.043902	0.019906	-0.028876	0.01311	0.017554	-0.023119	0.011353	-0.0021386	-0.072736	-0.039598	-0.028569	-0.031306	-0.016018	0.0004114	-0.0072734	-0.0035273	0.042431	0.046589	0.020804	0.062246	0.061116	-0.032772	-0.0020908	-0.011529
186	-0.020008	-0.012317	0.5273	-0.0074757	-0.023008	-0.038614	-0.013536	0.0038763	0.037759	0.008559	-0.021779	0.0097732	-0.014096	0.054228	-0.042583	-0.0057217	-0.0098878	-0.0098878	0.10102	0.0054164	-0.013863	0.02035	-0.016699	-0.026793	0.0062719	0.043899	0.02019	-0.030328	0.015716	0.017476	-0.021747	0.0083333	2.98e-05	-0.075308	-0.041646	-0.031599	-0.030866	-0.016453	-0.0027822	-0.0094433	-0.0028036	0.040969	0.045929	0.019332	0.057117	0.062792	-0.033016	-0.0049729	-0.011277
196	-0.019384	-0.019629	0.54323	-0.0051601	-0.020499	-0.032185	-0.017405	0.0070545	0.029808	0.0059005	-0.021656	0.012316	-0.0065266	0.05727	-0.044825	-0.0068288	-0.014846	-0.014846	0.11026	0.0068008	-0.012739	0.016718	-0.022891	-0.022495	0.0052229	0.046055	0.021387	-0.027715	0.021729	0.014033	-0.020104	0.0088575	0.0037685	-0.069989	-0.03888	-0.02614	-0.024723	-0.013891	0.0034527	-0.012195	0.0006257	0.044638	0.044944	0.014814	0.053062	0.079197	-0.033924	-0.0012062	-0.010244
11214	-0.019467	-0.011747	0.53541	-0.0097315	-0.024679	-0.04033	-0.015889	0.00068582	0.032831	0.0067441	-0.025049	0.0049087	-0.0092659	0.052617	-0.046148	-0.0076434	-0.012697	-0.012697	0.10589	0.008834	-0.018734	0.022105	-0.022017	-0.02331	0.0032979	0.043545	0.019985	-0.036432	0.010672	0.016382	-0.024737	0.0088089	0.00022188	-0.081191	-0.04608	-0.032216	-0.033511	-0.018079	-0.0036991	-0.0093717	-0.0020787	0.042178	0.040896	0.015671	0.058337	0.065898	-0.034046	-0.0060567	-0.00022215
207	-0.022907	-0.018575	0.59474	-0.0093096	-0.022561	-0.041071	-0.023067	-0.00053582	0.024081	0.0070228	-0.024641	0.00032899	-0.0028676	0.050175	-0.039949	-0.0077582	-0.015391	-0.015391	0.1095	0.0033182	-0.025022	0.021742	-0.029504	-0.017637	-0.0068458	0.038476	0.015694	-0.041739	0.011676	0.017071	-0.022716	0.019581	0.0023234	-0.076571	-0.05011	-0.02388	-0.036772	-0.024127	0.00308	-0.015271	0.0085397	0.042715	0.026608	-0.0012383	0.047838	0.074222	-0.034543	-0.0082115	0.01458
226	-0.022972	-0.016524	0.60289	-0.0091173	-0.02446	-0.03865	-0.017844	-0.00028159	0.025514	0.0054535	-0.02397	0.0047175	-0.0088585	0.05009	-0.040405	-0.0094241	-0.015068	-0.015068	0.10322	-0.0047784	-0.020288	0.020224	-0.023993	-0.024491	-0.0047234	0.039983	0.013405	-0.040481	0.018781	0.018622	-0.024147	0.01166	0.0017322	-0.07846	-0.04787	-0.02555	-0.037189	-0.023515	-0.0057497	-0.021409	0.00084171	0.039027	0.034045	0.00079666	0.03973	0.064448	-0.035765	-0.019508	-0.0073672
657	-0.020509	-0.011779	0.53319	-0.0074408	-0.021196	-0.040401	-0.018778	0.0059544	0.028927	0.0083572	-0.02206	0.0036968	-0.0070178	0.05231	-0.044756	-0.0081222	-0.013932	-0.013932	0.10139	0.011858	-0.019889	0.022315	-0.026075	-0.021516	0.0010305	0.040805	0.018052	-0.037588	0.011386	0.014689	-0.021978	0.016474	0.0014731	-0.078821	-0.045355	-0.02912	-0.030609	-0.017226	-0.0010699	-0.0050368	0.00085409	0.044118	0.038513	0.0093587	0.052304	0.071295	-0.033866	-0.008466	0.0060091
353	-0.03405	-0.01993	0.71031	-0.024713	-0.02247	-0.053071	-0.015651	-0.020615	0.02376	0.0087763	-0.02615	-0.005243	0.0054784	0.049685	-0.034411	-0.018298	-0.007555	-0.007555	0.11719	-0.010078	-0.023015	0.034445	-0.020769	-0.027188	-0.0059137	0.03529	0.0051433	-0.047528	-0.0047703	0.013996	-0.025044	0.0082525	-0.01033	-0.089324	-0.053506	-0.029906	-0.049848	-0.035394	-0.0061692	-0.025378	0.0051556	0.028686	0.032757	0.0073534	0.01991	0.046703	-0.036398	-0.027745	-0.018486
5562	-0.021624	-0.015894	0.5771	-0.0069114	-0.021066	-0.039375	-0.024151	0.003137	0.02696	0.0087914	-0.024374	-0.0020077	-0.0031106	0.053389	-0.042327	-0.0058286	-0.015437	-0.015437	0.10609	0.0081745	-0.02472	0.022096	-0.032424	-0.017456	-0.0064732	0.036848	0.016918	-0.043971	0.009149	0.016644	-0.022762	0.019867	0.0055663	-0.076041	-0.049053	-0.023352	-0.033978	-0.021715	0.002646	-0.012934	0.010261	0.046521	0.027743	-0.0028681	0.048288	0.081562	-0.035073	-0.010921	0.021872
4878	-0.023127	-0.016587	0.57836	-0.0051414	-0.024892	-0.036459	-0.015531	0.0018574	0.026335	0.0040662	-0.024917	0.0039223	-0.011037	0.049639	-0.040522	-0.0067932	-0.016006	-0.016006	0.10175	-0.0045042	-0.021273	0.016275	-0.025962	-0.023957	-0.0049324	0.037753	0.014501	-0.037001	0.025058	0.019595	-0.022806	0.010632	0.0061609	-0.07388	-0.048278	-0.029688	-0.033978	-0.020078	-0.006418	-0.022733	0.0034383	0.040046	0.031502	-0.0014056	0.046742	0.065572	-0.034794	-0.01461	-0.00089041
317	-0.024051	-0.019233	0.59051	-0.0069498	-0.026511	-0.03911	-0.01783	-0.0015011	0.029519	0.0036418	-0.025297	0.0034808	-0.0088461	0.04978	-0.040797	-0.0052373	-0.01413	-0.01413	0.10509	-0.0056857	-0.021816	0.018158	-0.025234	-0.020474	-0.0047797	0.040694	0.016691	-0.03796	0.01999	0.02047	-0.025661	0.012398	0.00046466	-0.076651	-0.048847	-0.025757	-0.039913	-0.024769	-0.0023401	-0.022087	0.0041364	0.04191	0.029123	0.0010461	0.049326	0.065463	-0.034023	-0.012372	-0.00011706
324	-0.022617	-0.017367	0.57643	-0.0060387	-0.025518	-0.037972	-0.018831	0.0016614	0.026488	0.0051454	-0.023808	0.0072329	-0.00964	0.049197	-0.040548	-0.006581	-0.016485	-0.016485	0.10522	-0.0030133	-0.01979	0.016467	-0.02561	-0.020989	-0.0033154	0.040989	0.016592	-0.037927	0.02324	0.019197	-0.023733	0.013579	0.0009121	-0.076021	-0.046341	-0.024835	-0.034649	-0.020952	-0.0018885	-0.019065	0.0018269	0.041664	0.033361	0.0017398	0.049024	0.065893	-0.034703	-0.010752	-0.0018106
328	-0.041165	-0.033802	0.71035	-0.0069698	-0.026697	-0.041015	-0.010513	-0.020213	0.051761	0.019314	-0.030057	-0.002922	0.00071088	0.052883	-0.028074	-0.012393	-0.010146	-0.010146	0.10281	-0.022452	-0.014145	0.029765	-0.011388	-0.010339	-0.011104	0.042037	0.014619	-0.044043	-0.0041757	0.025192	-0.034524	0.0066562	-0.0099696	-0.075348	-0.050936	0.0024587	-0.059061	-0.045098	0.016936	-0.032639	0.003295	0.016456	0.023961	0.014877	0.026352	0.079518	-0.031384	-0.0030044	-0.0040647
333	-0.023786	-0.016629	0.57066	-0.00553	-0.025018	-0.037734	-0.017001	0.003321	0.025192	0.0048736	-0.024129	0.0060538	-0.01081	0.049068	-0.040824	-0.007637	-0.017434	-0.017434	0.10052	-0.0036871	-0.019832	0.015583	-0.025481	-0.022126	-0.0031189	0.039617	0.015668	-0.037127	0.022782	0.018502	-0.022505	0.012563	0.0038276	-0.075389	-0.045862	-0.027033	-0.03473	-0.020355	-0.0030779	-0.020001	0.0010504	0.039619	0.034743	0.0011308	0.046958	0.065502	-0.033626	-0.01414	-0.0041518
8743	-0.023637	-0.016394	0.58102	-0.0059423	-0.025766	-0.037252	-0.016869	0.00032603	0.026861	0.0038331	-0.02557	0.0037175	-0.011108	0.049299	-0.040468	-0.006757	-0.015912	-0.015912	0.10315	-0.0042437	-0.021348	0.016797	-0.025948	-0.023154	-0.0044146	0.038528	0.014958	-0.038393	0.024701	0.019355	-0.023665	0.010523	0.004247	-0.076302	-0.049049	-0.0296	-0.035896	-0.02133	-0.0068142	-0.022426	0.0023278	0.039587	0.031685	-0.00056642	0.046068	0.063606	-0.035211	-0.015692	-0.0023862
8742	-0.02331	-0.016193	0.57793	-0.0056928	-0.025123	-0.03692	-0.01651	0.0013625	0.026793	0.0041366	-0.024827	0.0045632	-0.010982	0.049159	-0.04053	-0.0071358	-0.016307	-0.016307	0.10229	-0.0037724	-0.020759	0.016869	-0.025563	-0.02298	-0.0042444	0.038698	0.015297	-0.038121	0.024749	0.019274	-0.023063	0.011407	0.0039151	-0.075745	-0.047911	-0.028638	-0.034728	-0.020672	-0.006338	-0.021515	0.0022049	0.039759	0.032698	-0.00035182	0.046232	0.065285	-0.035101	-0.015325	-0.0018162
7804	-0.018945	-0.0094747	0.50065	-0.010663	-0.025153	-0.039727	-0.012127	0.0029867	0.035353	0.006813	-0.022857	0.010341	-0.015353	0.053403	-0.047743	-0.0093256	-0.010446	-0.010446	0.10137	0.01176	-0.011978	0.020339	-0.016079	-0.027773	0.010335	0.045657	0.020389	-0.030039	0.010789	0.014652	-0.022965	0.0047845	-0.0034674	-0.080398	-0.040705	-0.033377	-0.030189	-0.014603	-0.0037498	-0.0046174	-0.0075723	0.039707	0.051879	0.027696	0.061766	0.058864	-0.033004	-0.0022165	-0.017312
375	-0.020705	-0.016239	0.55797	-0.0073583	-0.027213	-0.040334	-0.015288	-0.0020785	0.03362	0.0056023	-0.024406	0.0060606	-0.010842	0.053794	-0.045324	-0.0058759	-0.013837	-0.013837	0.10575	0.00098356	-0.018156	0.020062	-0.022233	-0.022339	0.0010974	0.045156	0.019506	-0.035453	0.01301	0.020011	-0.02758	0.0078553	-0.0021109	-0.079928	-0.046319	-0.027124	-0.037978	-0.021925	-0.00085516	-0.014266	-0.0018265	0.042874	0.038069	0.012856	0.055917	0.067777	-0.034612	-0.0057634	-0.0054729
392	-0.023639	-0.020147	0.58599	-0.0051623	-0.026441	-0.037229	-0.019292	-0.0012367	0.027276	0.0038187	-0.026052	0.0045818	-0.010706	0.050331	-0.040939	-0.0046968	-0.015592	-0.015592	0.10826	-0.0059272	-0.020509	0.016262	-0.025731	-0.02004	-0.0043271	0.040973	0.017337	-0.036357	0.021229	0.020731	-0.023986	0.011268	0.0022424	-0.074209	-0.048116	-0.024812	-0.037978	-0.023273	0.00085749	-0.022801	0.0030227	0.041903	0.030269	0.00052284	0.054691	0.067796	-0.034711	-0.0060946	0.0010956
393	-0.023639	-0.020147	0.58599	-0.0051623	-0.026441	-0.037229	-0.019292	-0.0012367	0.027276	0.0038187	-0.026052	0.0045818	-0.010706	0.050331	-0.040939	-0.0046968	-0.015592	-0.015592	0.10826	-0.0059272	-0.020509	0.016262	-0.025731	-0.02004	-0.0043271	0.040973	0.017337	-0.036357	0.021229	0.020731	-0.023986	0.011268	0.0022424	-0.074209	-0.048116	-0.024812	-0.037978	-0.023273	0.00085749	-0.022801	0.0030227	0.041903	0.030269	0.00052284	0.054691	0.067796	-0.034711	-0.0060946	0.0010956
394	-0.026594	-0.022943	0.60582	-0.005835	-0.027888	-0.039907	-0.016626	-0.0060583	0.029422	0.0041369	-0.026116	0.0034312	-0.00754	0.057616	-0.03913	-0.0064497	-0.016152	-0.016152	0.11381	-0.011348	-0.021073	0.018356	-0.02311	-0.018214	-0.0048699	0.041971	0.015571	-0.036595	0.014242	0.021246	-0.025496	0.012892	-0.0020384	-0.075635	-0.048052	-0.019511	-0.042745	-0.027777	0.0042019	-0.02291	0.00083314	0.041426	0.030504	0.0020278	0.05283	0.069878	-0.034437	-0.0029899	0.00028298
395	-0.023018	-0.021623	0.58751	-0.0057031	-0.027101	-0.038547	-0.021278	-0.0022357	0.024614	0.0029725	-0.025933	0.005439	-0.0090804	0.049288	-0.040855	-0.0046245	-0.015457	-0.015457	0.11514	-0.0058738	-0.022092	0.015228	-0.02665	-0.019507	-0.0041442	0.041208	0.016474	-0.03551	0.019642	0.019544	-0.024691	0.012665	0.0002868	-0.072714	-0.047926	-0.024012	-0.03736	-0.02353	0.0022182	-0.022486	0.0030442	0.043811	0.030358	0.00038455	0.058301	0.06643	-0.035194	-0.0025653	0.0013851
9138	-0.019405	-0.010845	0.54792	-0.0096536	-0.017208	-0.035423	-0.014989	0.0094341	0.022485	0.0044099	-0.015684	0.012938	-0.005935	0.047664	-0.040083	-0.014119	-0.017985	-0.017985	0.10119	0.0070698	-0.01649	0.019852	-0.020493	-0.025976	0.00096683	0.041476	0.01408	-0.036427	0.027269	0.012248	-0.017782	0.016801	0.001208	-0.077735	-0.038505	-0.025825	-0.023983	-0.012156	-0.012331	-0.0094222	-0.0043174	0.041588	0.048644	0.0036739	0.036929	0.059356	-0.034133	-0.02353	-0.014077
9826	-0.023538	-0.01929	0.58429	-0.0050343	-0.025776	-0.037008	-0.018771	-0.00062498	0.026144	0.0042018	-0.02561	0.0052958	-0.010767	0.050484	-0.040361	-0.0054232	-0.016483	-0.016483	0.1118	-0.0061199	-0.020578	0.015696	-0.025631	-0.02126	-0.0038839	0.040307	0.016856	-0.037071	0.022222	0.020442	-0.023027	0.010389	0.0018819	-0.074248	-0.047923	-0.026223	-0.036895	-0.021626	-0.00020119	-0.022708	0.0020366	0.04145	0.030661	0.0011783	0.059343	0.066793	-0.034441	-4.68e-05	-0.00024947
7984	-0.022915	-0.011647	0.58806	-0.020152	-0.014855	-0.045605	-0.016451	0.0056865	0.025456	-0.0006747	-0.011419	0.0073266	0.0094806	0.046492	-0.031963	-0.012245	-0.0095809	-0.0095809	0.10185	0.0080563	-0.022737	0.036467	-0.014647	-0.025529	-0.001991	0.03829	0.011593	-0.03509	0.028757	0.011229	-0.018051	0.022318	-0.012205	-0.087494	-0.047979	-0.03359	-0.03409	-0.017076	-0.018115	-0.0013981	-0.0011237	0.042657	0.039932	0.0089353	0.025756	0.043838	-0.033781	-0.026128	-0.021035
405	-0.022018	-0.022152	0.57779	-0.0038339	-0.022423	-0.03298	-0.019094	0.0038647	0.027191	0.0053824	-0.022613	0.0080804	-0.0059458	0.053085	-0.04134	-0.0050328	-0.016088	-0.016088	0.10813	-0.0022652	-0.01793	0.015858	-0.027219	-0.019636	-0.0023846	0.042537	0.018658	-0.033377	0.024579	0.018138	-0.022417	0.011435	0.0043437	-0.070535	-0.043983	-0.023428	-0.031462	-0.019464	0.0018624	-0.0204	0.0048026	0.043818	0.033916	0.0015803	0.047039	0.07691	-0.034738	-0.0083342	-0.002435
10097	0	0	0	0	0	0	0	0	0	0	0	0	0	0	0	0	0	0	0	0	0	0	0	0	0	0	0	0	0	0	0	0	0	0	0	0	0	0	0	0	0	0	0	0	0	0	0	0	0
10096	-0.019405	-0.010845	0.54792	-0.0096536	-0.017208	-0.035423	-0.014989	0.0094341	0.022485	0.0044099	-0.015684	0.012938	-0.005935	0.047664	-0.040083	-0.014119	-0.017985	-0.017985	0.10119	0.0070698	-0.01649	0.019852	-0.020493	-0.025976	0.00096683	0.041476	0.01408	-0.036427	0.027269	0.012248	-0.017782	0.016801	0.001208	-0.077735	-0.038505	-0.025825	-0.023983	-0.012156	-0.012331	-0.0094222	-0.0043174	0.041588	0.048644	0.0036739	0.036929	0.059356	-0.034133	-0.02353	-0.014077
4217	-0.023918	-0.016902	0.56886	-0.0078089	-0.023612	-0.037596	-0.023226	0.0019199	0.025116	0.0063154	-0.024766	-9.37e-05	-0.0063209	0.049554	-0.042829	-0.0073191	-0.016611	-0.016611	0.10227	0.0057318	-0.024806	0.019991	-0.030816	-0.015967	-0.0056967	0.038344	0.015609	-0.044125	0.011953	0.01679	-0.025101	0.019974	0.0027526	-0.077911	-0.049504	-0.02515	-0.036469	-0.022337	0.0019161	-0.012123	0.0051958	0.043395	0.026391	-0.0026581	0.048217	0.074187	-0.03611	-0.0118	0.015646
1386	-0.019727	-0.029354	0.5919	-0.0030282	-0.022585	-0.032284	-0.023273	0.00091867	0.031696	0.0065692	-0.023869	0.0078822	-0.0022336	0.055298	-0.041214	0.00053289	-0.015752	-0.015752	0.11105	-0.0054621	-0.018665	0.015352	-0.029328	-0.016065	-0.0041436	0.046622	0.023192	-0.029381	0.020534	0.021956	-0.026041	0.010144	0.0046583	-0.065732	-0.044161	-0.014961	-0.034165	-0.023633	0.013656	-0.025025	0.0090596	0.046565	0.027017	0.0019759	0.053356	0.09249	-0.033611	0.0012663	0.0073173
472	-0.022904	-0.01407	0.57098	-0.0065426	-0.021333	-0.038179	-0.021036	0.0037177	0.025081	0.0071975	-0.023738	0.0012874	-0.0059624	0.050652	-0.041752	-0.0079537	-0.016286	-0.016286	0.10354	0.0048939	-0.023388	0.020138	-0.029179	-0.019695	-0.0050724	0.037248	0.015697	-0.042649	0.015791	0.015665	-0.022742	0.017689	0.0043464	-0.077502	-0.04768	-0.026296	-0.03293	-0.019939	-0.0031355	-0.014178	0.0045973	0.043128	0.031714	-0.0019486	0.044952	0.072149	-0.034782	-0.015295	0.011374
51761	0	0	0	0	0	0	0	0	0	0	0	0	0	0	0	0	0	0	0	0	0	0	0	0	0	0	0	0	0	0	0	0	0	0	0	0	0	0	0	0	0	0	0	0	0	0	0	0	0
545	-0.021992	-0.013938	0.57059	-0.0064525	-0.021387	-0.038247	-0.021725	0.0038596	0.025492	0.0075526	-0.024302	0.00011518	-0.005772	0.05098	-0.041558	-0.0071009	-0.016289	-0.016289	0.10354	0.0062086	-0.02386	0.020896	-0.030219	-0.019493	-0.0056888	0.036941	0.016087	-0.042924	0.01493	0.016243	-0.022204	0.018486	0.0059874	-0.076599	-0.047931	-0.026058	-0.032615	-0.020118	-0.0017383	-0.01378	0.0067516	0.043585	0.02995	-0.0026871	0.046235	0.075126	-0.035412	-0.014325	0.015926
11277	-0.033854	-0.020886	0.60262	-0.0083227	-0.026232	-0.036427	-0.013897	-0.0044547	0.037038	0.0081308	-0.026846	0.0045375	-0.0096785	0.055388	-0.039986	-0.016892	-0.019453	-0.019453	0.10476	-0.0061248	-0.015377	0.020534	-0.021088	-0.013932	-0.0033478	0.04099	0.011228	-0.044137	0.0088606	0.017035	-0.028525	0.011449	-0.00089619	-0.080972	-0.0468	-0.01595	-0.04361	-0.027888	0.001398	-0.018534	-0.0034348	0.031161	0.038087	0.0080294	0.031433	0.074908	-0.035706	-0.014375	-0.012504
551	-0.019409	-0.011527	0.54525	-0.012151	-0.023096	-0.040929	-0.014718	4.28e-05	0.028802	0.0076315	-0.024761	0.0048264	-0.009809	0.051218	-0.04596	-0.011386	-0.013397	-0.013397	0.10572	0.010765	-0.019469	0.023782	-0.02073	-0.025191	0.0025875	0.041189	0.018155	-0.03792	0.0090836	0.014537	-0.022347	0.010901	-0.00044374	-0.08162	-0.044462	-0.03187	-0.031206	-0.016966	-0.0036874	-0.007034	-0.0016994	0.040772	0.043313	0.017516	0.05606	0.064279	-0.033574	-0.0068043	0.002808
8312	-0.021348	-0.013863	0.53978	-0.0091005	-0.023362	-0.036953	-0.016282	0.0050786	0.025491	0.0055333	-0.02297	0.01096	-0.011558	0.052903	-0.043424	-0.010938	-0.01637	-0.01637	0.10991	0.0064234	-0.014241	0.016855	-0.019823	-0.024136	0.0060926	0.04281	0.017478	-0.034554	0.020471	0.01371	-0.019108	0.012836	0.00011668	-0.076693	-0.040565	-0.030353	-0.028225	-0.01496	-0.0012219	-0.0094703	-0.005892	0.041889	0.047037	0.015272	0.058373	0.061674	-0.033212	-0.0023293	-0.011529
154	-0.024884	-0.0080231	0.50199	-0.010179	-0.024919	-0.041999	-0.0068967	0.0090205	0.028865	0.0065753	-0.020508	0.013959	-0.013255	0.056239	-0.045407	-0.012788	-0.015258	-0.015258	0.098791	0.0045546	-0.0051264	0.016274	-0.01415	-0.028223	0.016208	0.044776	0.018704	-0.02881	0.0086983	0.012095	-0.018153	0.0081505	-0.0034872	-0.078794	-0.033385	-0.031549	-0.029298	-0.01292	0.0016625	-0.0041806	-0.0084369	0.038198	0.058603	0.028049	0.054788	0.054705	-0.026362	-0.0041338	-0.022983
572	-0.024198	-0.020497	0.58672	-0.007136	-0.025914	-0.038075	-0.018892	-0.0020662	0.029381	0.0042287	-0.025604	0.0053651	-0.007908	0.050773	-0.03978	-0.0048781	-0.014681	-0.014681	0.10884	-0.0051335	-0.01954	0.018143	-0.025874	-0.017814	-0.0043658	0.04115	0.016989	-0.035743	0.01861	0.020168	-0.025024	0.01159	0.0001085	-0.076256	-0.047036	-0.022982	-0.039549	-0.024171	0.00072662	-0.022089	0.0034997	0.043254	0.03	0.0021557	0.048817	0.066714	-0.035166	-0.010777	0.00015599
578	-0.024138	-0.016482	0.57678	-0.0061691	-0.025169	-0.037711	-0.017689	0.0012802	0.02543	0.0041973	-0.024448	0.0043697	-0.010541	0.04901	-0.040681	-0.0079018	-0.016317	-0.016317	0.10203	-0.0026085	-0.020711	0.016502	-0.026085	-0.02161	-0.0036947	0.039369	0.01483	-0.038852	0.023701	0.018024	-0.023209	0.011445	0.004419	-0.076877	-0.048162	-0.029645	-0.035815	-0.021213	-0.0065487	-0.02067	0.00072216	0.040143	0.033848	6.68e-05	0.044786	0.063259	-0.034603	-0.016984	-0.0054521
581	-0.018521	-0.021241	0.5251	-0.0048104	-0.037926	-0.052307	-0.018895	-0.032715	0.028347	-0.0031735	-0.038174	0.0018591	-0.023907	0.01782	-0.052684	0.00069679	-0.023896	-0.023896	0.12195	-0.0033179	-0.032904	0.016624	-0.03333	-0.011026	-0.0079428	0.046977	0.027048	-0.05274	0.022985	0.035035	-0.04748	-0.00035789	-0.014286	-0.10664	-0.060661	-0.024816	-0.062479	-0.032047	-0.015939	-0.027892	-0.0090384	0.034948	0.020783	-0.0036921	0.071758	0.040699	-0.035025	-0.014116	0.0096296
596	-0.016791	-0.022261	0.52292	-0.0033091	-0.036411	-0.048854	-0.019488	-0.029292	0.027684	-0.0016379	-0.036326	0.0040046	-0.023029	0.019951	-0.053449	0.00049556	-0.024759	-0.024759	0.1221	-0.001822	-0.031646	0.015879	-0.034055	-0.012198	-0.0066451	0.048842	0.028729	-0.051537	0.025043	0.034385	-0.046219	0.00147	-0.012631	-0.10306	-0.058908	-0.024218	-0.057793	-0.029863	-0.013515	-0.025775	-0.0079605	0.036611	0.023111	-0.0035918	0.071042	0.049241	-0.034586	-0.011808	0.01021
598	-0.023707	-0.016656	0.57486	-0.0059769	-0.025641	-0.03761	-0.01847	0.0021186	0.026537	0.0053412	-0.024255	0.0057642	-0.01003	0.049477	-0.040703	-0.0072372	-0.016698	-0.016698	0.10253	-0.0024477	-0.019457	0.016125	-0.026624	-0.021896	-0.0032185	0.040515	0.015954	-0.038424	0.023421	0.018853	-0.023303	0.012621	0.0040619	-0.076236	-0.04704	-0.027185	-0.034978	-0.021244	-0.0037561	-0.019563	0.0014858	0.04108	0.033659	0.00082017	0.044898	0.066315	-0.034558	-0.014742	-0.0031361
637	-0.02365	-0.017275	0.58152	-0.0052669	-0.026396	-0.037547	-0.018124	7.61e-05	0.027368	0.004022	-0.025912	0.0037258	-0.011143	0.049507	-0.040593	-0.0060797	-0.016115	-0.016115	0.10306	-0.0048509	-0.020586	0.016345	-0.026313	-0.021689	-0.0047091	0.039325	0.016119	-0.037653	0.023548	0.019724	-0.024363	0.010903	0.0035458	-0.075728	-0.049086	-0.02821	-0.036962	-0.022571	-0.0041975	-0.022437	0.0028278	0.040117	0.030576	-0.00034009	0.046977	0.066349	-0.035122	-0.014045	-0.0014518
638	-0.019405	-0.010845	0.54792	-0.0096536	-0.017208	-0.035423	-0.014989	0.0094341	0.022485	0.0044099	-0.015684	0.012938	-0.005935	0.047664	-0.040083	-0.014119	-0.017985	-0.017985	0.10119	0.0070698	-0.01649	0.019852	-0.020493	-0.025976	0.00096683	0.041476	0.01408	-0.036427	0.027269	0.012248	-0.017782	0.016801	0.001208	-0.077735	-0.038505	-0.025825	-0.023983	-0.012156	-0.012331	-0.0094222	-0.0043174	0.041588	0.048644	0.0036739	0.036929	0.059356	-0.034133	-0.02353	-0.014077
332	-0.025524	-0.018336	0.57507	-0.0074726	-0.025013	-0.035065	-0.021687	0.0028744	0.024968	0.004915	-0.023024	0.0067945	-0.011863	0.048082	-0.042307	-0.0090629	-0.018461	-0.018461	0.10014	-0.001	-0.0198	0.016546	-0.027554	-0.015727	-0.0033931	0.039915	0.015348	-0.04271	0.018559	0.016034	-0.025692	0.014569	0.00060661	-0.078513	-0.046346	-0.024318	-0.034921	-0.020166	-0.00072825	-0.01865	-0.00023716	0.040222	0.032579	0.0012562	0.046018	0.066473	-0.03792	-0.013193	-0.004616
29760	-0.023272	-0.017627	0.5794	-0.0047587	-0.026044	-0.037209	-0.018297	0.00109	0.027789	0.0047963	-0.025047	0.0048749	-0.011127	0.049952	-0.040728	-0.0056267	-0.016185	-0.016185	0.1027	-0.0042087	-0.020128	0.016523	-0.026131	-0.021077	-0.0041786	0.040187	0.016799	-0.037596	0.023342	0.020127	-0.024168	0.011955	0.0030064	-0.075119	-0.04792	-0.026171	-0.036204	-0.022063	-0.0026052	-0.02155	0.003162	0.040883	0.031206	0.00022325	0.047114	0.067501	-0.034543	-0.012932	-0.00053715
406	-0.022062	-0.025489	0.59287	-0.0045346	-0.020201	-0.029884	-0.018783	0.0028664	0.027929	0.0044208	-0.022954	0.0091594	-0.0024621	0.055348	-0.042516	-0.0052434	-0.015351	-0.015351	0.11652	-0.0025451	-0.016349	0.016305	-0.028516	-0.021678	-0.0020721	0.043612	0.01837	-0.031052	0.023612	0.016665	-0.022181	0.0073704	0.0064562	-0.069235	-0.041507	-0.022423	-0.028281	-0.017811	0.0030421	-0.022246	0.0067943	0.044602	0.035616	0.0033254	0.045644	0.082476	-0.03665	-0.0039845	-0.0044513
659	-0.018551	-0.01107	0.52842	-0.005654	-0.022315	-0.041296	-0.017454	0.0041666	0.034475	0.0086167	-0.022929	0.004659	-0.010338	0.051776	-0.047204	-0.0060299	-0.012175	-0.012175	0.1037	0.011595	-0.019182	0.021777	-0.025698	-0.024295	0.0011015	0.043089	0.01943	-0.035841	0.0084098	0.016604	-0.025302	0.010428	0.0011772	-0.079703	-0.045585	-0.02851	-0.031539	-0.017528	-0.0030856	-0.0078074	6.82e-05	0.043227	0.040145	0.012018	0.057721	0.070357	-0.035612	-0.0046565	0.002402
672	-0.021051	-0.02443	0.58164	-0.0048504	-0.02174	-0.031255	-0.021357	0.0029102	0.029079	0.0064041	-0.022265	0.008049	-0.0055202	0.053653	-0.041246	-0.0037486	-0.016272	-0.016272	0.10902	-0.0022059	-0.017645	0.016856	-0.027893	-0.019619	-0.0030199	0.044076	0.019985	-0.032595	0.02208	0.01899	-0.022685	0.011651	0.0040702	-0.069466	-0.043732	-0.020599	-0.031434	-0.020264	0.0052941	-0.021035	0.0067459	0.046311	0.032756	0.0025837	0.047085	0.08352	-0.034979	-0.006353	0.0013167
675	-0.022931	-0.02239	0.58929	-0.0038701	-0.025375	-0.035236	-0.020174	0.0008048	0.028941	0.0065914	-0.024042	0.0055689	-0.0091767	0.052813	-0.041594	-0.0040442	-0.015572	-0.015572	0.106	-0.0041924	-0.018493	0.01661	-0.027717	-0.019495	-0.004405	0.041735	0.018726	-0.035896	0.019229	0.020991	-0.025024	0.012019	0.0026738	-0.071536	-0.045913	-0.02172	-0.035967	-0.022803	0.0049038	-0.021796	0.0061652	0.04431	0.030296	0.0013587	0.048255	0.078729	-0.034605	-0.0077954	0.0018704
695	-0.021567	-0.014184	0.57244	-0.0067017	-0.021015	-0.038988	-0.022387	0.0043108	0.02567	0.0069833	-0.02398	1.03e-05	-0.0047074	0.050637	-0.040942	-0.0063844	-0.015912	-0.015912	0.10262	0.007505	-0.023847	0.021861	-0.030276	-0.018032	-0.005991	0.038058	0.015639	-0.04164	0.015696	0.016775	-0.023425	0.019657	0.0050824	-0.0764	-0.048561	-0.025047	-0.033785	-0.020568	-0.00067434	-0.011547	0.0064068	0.043868	0.029121	-0.0022374	0.045878	0.076449	-0.035339	-0.012469	0.018722
8945	-0.023615	-0.019085	0.59146	-0.00571	-0.027073	-0.03881	-0.019838	-0.0018439	0.027806	0.0043833	-0.025835	0.0029333	-0.0099059	0.051474	-0.041121	-0.0049124	-0.015326	-0.015326	0.10687	-0.0059845	-0.021422	0.017271	-0.02672	-0.021628	-0.0039796	0.040353	0.016146	-0.038149	0.018991	0.020572	-0.025902	0.010329	0.002857	-0.075442	-0.050132	-0.026618	-0.039223	-0.024215	-0.0016835	-0.023485	0.0046052	0.041704	0.029066	0.00011679	0.045764	0.06824	-0.034732	-0.013314	-0.00033947
2889	-0.019405	-0.010845	0.54792	-0.0096536	-0.017208	-0.035423	-0.014989	0.0094341	0.022485	0.0044099	-0.015684	0.012938	-0.005935	0.047664	-0.040083	-0.014119	-0.017985	-0.017985	0.10119	0.0070698	-0.01649	0.019852	-0.020493	-0.025976	0.00096683	0.041476	0.01408	-0.036427	0.027269	0.012248	-0.017782	0.016801	0.001208	-0.077735	-0.038505	-0.025825	-0.023983	-0.012156	-0.012331	-0.0094222	-0.0043174	0.041588	0.048644	0.0036739	0.036929	0.059356	-0.034133	-0.02353	-0.014077
23523	-0.017921	-0.021473	0.65037	-0.022699	-0.025042	-0.054634	-0.016123	-0.023038	0.024414	0.00057681	-0.024702	0.0038695	-0.0001228	0.037019	-0.043139	-0.014203	-0.011695	-0.011695	0.12686	-0.0012984	-0.027159	0.028786	-0.019272	-0.024231	-0.0068541	0.04706	0.011934	-0.046776	0.0027697	0.019265	-0.037756	0.0021331	-0.017024	-0.093314	-0.049768	-0.022044	-0.047838	-0.029803	-0.013744	-0.021165	-0.007728	0.035351	0.037192	0.015256	0.049294	0.038598	-0.0338	-0.012647	-0.017545
790	-0.028176	-0.018438	0.59556	-0.010495	-0.02399	-0.04415	-0.02043	-0.0028088	0.02984	0.0077048	-0.025494	-0.00098999	-0.0032967	0.054777	-0.038691	-0.012277	-0.016119	-0.016119	0.10407	0.00099107	-0.023554	0.024858	-0.026479	-0.01968	-0.0062896	0.039243	0.013374	-0.043192	0.0069895	0.016373	-0.020748	0.017903	0.0015233	-0.07869	-0.052635	-0.023137	-0.041935	-0.028589	0.00084201	-0.015102	0.010833	0.038332	0.031604	0.001383	0.032533	0.074143	-0.033873	-0.019013	0.0092759
5535	0	0	0	0	0	0	0	0	0	0	0	0	0	0	0	0	0	0	0	0	0	0	0	0	0	0	0	0	0	0	0	0	0	0	0	0	0	0	0	0	0	0	0	0	0	0	0	0	0
823	-0.019405	-0.010845	0.54792	-0.0096536	-0.017208	-0.035423	-0.014989	0.0094341	0.022485	0.0044099	-0.015684	0.012938	-0.005935	0.047664	-0.040083	-0.014119	-0.017985	-0.017985	0.10119	0.0070698	-0.01649	0.019852	-0.020493	-0.025976	0.00096683	0.041476	0.01408	-0.036427	0.027269	0.012248	-0.017782	0.016801	0.001208	-0.077735	-0.038505	-0.025825	-0.023983	-0.012156	-0.012331	-0.0094222	-0.0043174	0.041588	0.048644	0.0036739	0.036929	0.059356	-0.034133	-0.02353	-0.014077
824	-0.026406	-0.019265	0.59194	-0.0025175	-0.028676	-0.040366	-0.015637	-0.0056444	0.03272	0.0042783	-0.026889	0.0083518	-0.012002	0.056037	-0.040349	-0.0078331	-0.016009	-0.016009	0.10485	-0.0074735	-0.021447	0.018028	-0.023236	-0.019675	-0.0050866	0.040731	0.013974	-0.03948	0.018202	0.02241	-0.027981	0.016806	-0.00042392	-0.077946	-0.046555	-0.016771	-0.041365	-0.024829	-0.0018396	-0.021643	0.0016848	0.038511	0.032078	0.0015912	0.043409	0.065863	-0.03508	-0.014575	-0.0017875
831	-0.021724	-0.019896	0.58759	-0.0057633	-0.027256	-0.039431	-0.019815	-0.0017481	0.027628	0.0044312	-0.025358	0.0036204	-0.011126	0.049112	-0.041672	-0.0052631	-0.015279	-0.015279	0.10392	-0.005633	-0.02201	0.017011	-0.026957	-0.019981	-0.006129	0.039818	0.016564	-0.037914	0.020068	0.020892	-0.026323	0.010384	0.00069093	-0.075666	-0.049815	-0.024478	-0.039051	-0.024366	-0.001779	-0.022986	0.0051327	0.041828	0.028047	0.0010824	0.047586	0.067801	-0.034248	-0.011395	0.00026882
889	-0.023357	-0.020172	0.59152	-0.0057466	-0.026789	-0.038208	-0.019696	-0.0028743	0.026584	0.0029586	-0.026794	0.0038093	-0.01041	0.05032	-0.040996	-0.0048285	-0.01592	-0.01592	0.1142	-0.0066081	-0.021579	0.016018	-0.026116	-0.02082	-0.0045492	0.040454	0.016698	-0.03745	0.021035	0.020691	-0.02421	0.0091241	0.0016056	-0.075522	-0.049868	-0.026527	-0.038956	-0.023424	-0.00017705	-0.024071	0.0026035	0.041608	0.028984	0.00098715	0.059844	0.06585	-0.034858	-3.18e-06	0.00045341
8536	-0.022424	-0.014641	0.57481	-0.0057323	-0.022874	-0.038721	-0.020794	0.0028057	0.026439	0.0065022	-0.025319	0.00018179	-0.0061823	0.051708	-0.041267	-0.0062428	-0.016012	-0.016012	0.10504	0.0034074	-0.023565	0.020003	-0.029523	-0.019527	-0.005249	0.037033	0.016027	-0.041696	0.017027	0.017048	-0.023281	0.016231	0.0065596	-0.076579	-0.049102	-0.027353	-0.034045	-0.020807	-0.0034337	-0.01681	0.0059586	0.043183	0.029069	-0.0022187	0.046422	0.073016	-0.035212	-0.01409	0.011514
816	-0.019996	0.0064344	0.60943	-0.025475	-0.0041102	-0.051855	-0.023945	-0.00050693	0.013021	0.015341	-0.018279	-0.017109	0.018233	0.04384	-0.038612	-0.026434	-0.011965	-0.011965	0.11604	0.040482	-0.033341	0.040451	-0.030464	-0.028161	-0.0083468	0.019384	-0.0004268	-0.065151	-0.019665	-0.0028663	-0.021923	0.024352	0.0025941	-0.095713	-0.048724	-0.035402	-0.027192	-0.017124	-0.023652	0.010378	-0.0011902	0.032632	0.04187	-0.00062459	0.019158	0.057096	-0.040896	-0.036205	0.017813
820	0	0	0	0	0	0	0	0	0	0	0	0	0	0	0	0	0	0	0	0	0	0	0	0	0	0	0	0	0	0	0	0	0	0	0	0	0	0	0	0	0	0	0	0	0	0	0	0	0
10487	0	0	0	0	0	0	0	0	0	0	0	0	0	0	0	0	0	0	0	0	0	0	0	0	0	0	0	0	0	0	0	0	0	0	0	0	0	0	0	0	0	0	0	0	0	0	0	0	0
10498	-0.023653	-0.030516	0.62602	-0.0097265	-0.023184	-0.034119	-0.024565	-0.0038114	0.028153	0.006718	-0.023872	0.0017061	-0.0039304	0.056523	-0.042248	-0.0051874	-0.013736	-0.013736	0.10775	-0.0081352	-0.021845	0.019313	-0.03036	-0.019565	-0.0077905	0.043486	0.018767	-0.034095	0.010507	0.019924	-0.018367	0.0092999	0.0069631	-0.067606	-0.047944	-0.018954	-0.03723	-0.028179	0.01414	-0.028116	0.022738	0.044527	0.026712	-0.00050908	0.046002	0.09206	-0.034267	-0.0067616	0.0062884
834	-0.02314	-0.019621	0.58712	-0.0055665	-0.027557	-0.038542	-0.018869	-0.001994	0.028415	0.0036359	-0.026075	0.0031851	-0.010126	0.049875	-0.041128	-0.0049172	-0.015115	-0.015115	0.10523	-0.0062541	-0.022105	0.0167	-0.026211	-0.020297	-0.0052332	0.040724	0.016841	-0.037854	0.019879	0.021011	-0.026179	0.011434	0.002487	-0.075329	-0.049206	-0.025491	-0.039458	-0.024645	-0.0016743	-0.023119	0.0036108	0.041917	0.028637	-0.00018836	0.050062	0.067035	-0.03432	-0.012225	0.0014874
843	-0.019405	-0.010845	0.54792	-0.0096536	-0.017208	-0.035423	-0.014989	0.0094341	0.022485	0.0044099	-0.015684	0.012938	-0.005935	0.047664	-0.040083	-0.014119	-0.017985	-0.017985	0.10119	0.0070698	-0.01649	0.019852	-0.020493	-0.025976	0.00096683	0.041476	0.01408	-0.036427	0.027269	0.012248	-0.017782	0.016801	0.001208	-0.077735	-0.038505	-0.025825	-0.023983	-0.012156	-0.012331	-0.0094222	-0.0043174	0.041588	0.048644	0.0036739	0.036929	0.059356	-0.034133	-0.02353	-0.014077
835	-0.025141	-0.017786	0.58171	-0.004166	-0.026971	-0.038141	-0.017087	-0.0016841	0.027764	0.0044055	-0.025108	0.0091266	-0.010964	0.051225	-0.040861	-0.0078151	-0.01685	-0.01685	0.10469	-0.004472	-0.02089	0.016548	-0.025154	-0.020876	-0.0035395	0.040992	0.014785	-0.038921	0.021436	0.020245	-0.025372	0.017411	0.000337	-0.077588	-0.044838	-0.020998	-0.036546	-0.021741	-0.0033076	-0.019879	0.00051823	0.040001	0.033757	0.00062682	0.044251	0.065075	-0.035443	-0.015737	-0.0024429
836	-0.030206	-0.021595	0.63781	-0.0044668	-0.028438	-0.043585	-0.013485	-0.010624	0.036059	0.0079552	-0.026987	0.006346	-0.0085202	0.060531	-0.037663	-0.010951	-0.014359	-0.014359	0.10535	-0.012075	-0.020886	0.022465	-0.019559	-0.019919	-0.0071066	0.040425	0.01173	-0.041344	0.0092591	0.023346	-0.029494	0.016702	-0.0036366	-0.078751	-0.047239	-0.01082	-0.046824	-0.03057	0.0013538	-0.024019	0.00237	0.034424	0.032263	0.004242	0.035052	0.068011	-0.034378	-0.016099	-0.0039931
839	-0.026353	-0.02112	0.59685	-0.0013758	-0.029041	-0.04059	-0.015544	-0.0066719	0.033591	0.0049502	-0.026243	0.010487	-0.011797	0.057592	-0.040741	-0.0071298	-0.015792	-0.015792	0.10497	-0.0085173	-0.02123	0.018077	-0.023002	-0.018473	-0.0055188	0.041757	0.01424	-0.039249	0.015479	0.024295	-0.029228	0.019415	-0.0020679	-0.076985	-0.044725	-0.011357	-0.042024	-0.025341	0.0018047	-0.021311	0.002578	0.039657	0.031289	0.0020139	0.04439	0.069144	-0.034798	-0.01218	0.00022154
840	-0.026353	-0.02112	0.59685	-0.0013758	-0.029041	-0.04059	-0.015544	-0.0066719	0.033591	0.0049502	-0.026243	0.010487	-0.011797	0.057592	-0.040741	-0.0071298	-0.015792	-0.015792	0.10497	-0.0085173	-0.02123	0.018077	-0.023002	-0.018473	-0.0055188	0.041757	0.01424	-0.039249	0.015479	0.024295	-0.029228	0.019415	-0.0020679	-0.076985	-0.044725	-0.011357	-0.042024	-0.025341	0.0018047	-0.021311	0.002578	0.039657	0.031289	0.0020139	0.04439	0.069144	-0.034798	-0.01218	0.00022154
841	-0.026296	-0.01997	0.59216	-0.0025765	-0.027945	-0.04042	-0.015577	-0.0051025	0.032233	0.0048224	-0.025997	0.0099512	-0.011805	0.055548	-0.040824	-0.0081376	-0.016308	-0.016308	0.1038	-0.00676	-0.021104	0.017831	-0.023363	-0.019271	-0.0052838	0.041691	0.013753	-0.039812	0.01698	0.023033	-0.02816	0.018632	-0.00019811	-0.077629	-0.045016	-0.014019	-0.040627	-0.024569	-0.00045019	-0.02048	0.0014297	0.038896	0.032626	0.001627	0.043044	0.067804	-0.034858	-0.014195	-0.0017015
842	-0.023451	-0.019675	0.59342	-0.006564	-0.027971	-0.039732	-0.019151	-0.0042494	0.026313	0.0022892	-0.026812	0.0037337	-0.010229	0.049245	-0.040959	-0.004824	-0.014327	-0.014327	0.11043	-0.0071255	-0.023799	0.016601	-0.025724	-0.020689	-0.0053519	0.03938	0.014978	-0.038083	0.020039	0.020389	-0.027252	0.011821	0.0012669	-0.076061	-0.05003	-0.026191	-0.039933	-0.024556	-0.0021986	-0.023116	0.0025827	0.041608	0.028564	-6.01e-05	0.053699	0.061614	-0.035366	-0.010059	-4.12e-05
847	-0.038331	-0.024197	0.74677	-0.01736	-0.021574	-0.042003	-0.017374	-0.013923	0.018271	0.017098	-0.02357	-0.0060686	0.0016464	0.047842	-0.034766	-0.016444	-0.0092367	-0.0092367	0.11133	-0.017769	-0.018636	0.025384	-0.024035	-0.029374	-0.0089948	0.031405	0.004828	-0.047765	-0.0096927	0.014825	-0.031019	0.0040476	-0.0029391	-0.080957	-0.048325	-0.027737	-0.048206	-0.034405	0.0028161	-0.033691	-0.0020384	0.028592	0.024296	0.0045828	0.021199	0.060557	-0.035512	-0.020559	-0.018408
867	-0.021818	-0.020857	0.58742	-0.0051294	-0.024145	-0.036497	-0.019934	0.0010176	0.027606	0.0045638	-0.02472	0.005745	-0.0068789	0.052233	-0.041563	-0.0045751	-0.015931	-0.015931	0.10939	-0.0047325	-0.020044	0.0167	-0.026951	-0.021062	-0.0028743	0.042674	0.017801	-0.035593	0.020804	0.019607	-0.025198	0.010261	0.0030413	-0.072722	-0.04679	-0.023704	-0.034872	-0.022017	0.00082734	-0.0225	0.0049188	0.041828	0.031063	0.00054586	0.046031	0.074314	-0.034575	-0.0097568	-0.00075921
1387	-0.020499	-0.01944	0.55627	-0.0098483	-0.023919	-0.035342	-0.018482	0.0020235	0.030804	0.0074687	-0.024069	0.0083404	-0.01031	0.056812	-0.044326	-0.0063066	-0.013316	-0.013316	0.10579	0.0041662	-0.014592	0.018911	-0.021291	-0.02279	0.003967	0.044236	0.021942	-0.031179	0.014987	0.016744	-0.021144	0.0097977	0.0018369	-0.072423	-0.041507	-0.026293	-0.031068	-0.018918	0.0081771	-0.014068	0.0022131	0.043394	0.040481	0.016699	0.056184	0.076292	-0.03322	-0.0029984	-0.0041847
6352	-0.036376	-0.020467	0.55371	-0.00072249	-0.033674	-0.052744	0.0058878	-0.017861	0.07548	0.015692	-0.043829	0.0014245	-0.0098326	0.037487	-0.024162	-0.022707	-0.022178	-0.022178	0.10184	-0.0082289	-0.01107	0.029864	-0.00010142	0.00064681	-0.0054693	0.04469	0.021168	-0.04979	0.004972	0.026059	-0.031829	0.015434	-0.015497	-0.086263	-0.045595	0.0056033	-0.062537	-0.046688	0.0029877	-0.014442	-0.0082662	0.0065809	0.03566	0.028554	0.034869	0.043966	-0.017886	-0.0043856	0.010953
890	-0.019405	-0.010845	0.54792	-0.0096536	-0.017208	-0.035423	-0.014989	0.0094341	0.022485	0.0044099	-0.015684	0.012938	-0.005935	0.047664	-0.040083	-0.014119	-0.017985	-0.017985	0.10119	0.0070698	-0.01649	0.019852	-0.020493	-0.025976	0.00096683	0.041476	0.01408	-0.036427	0.027269	0.012248	-0.017782	0.016801	0.001208	-0.077735	-0.038505	-0.025825	-0.023983	-0.012156	-0.012331	-0.0094222	-0.0043174	0.041588	0.048644	0.0036739	0.036929	0.059356	-0.034133	-0.02353	-0.014077
891	-0.023915	-0.016765	0.57683	-0.0054539	-0.026255	-0.037341	-0.018113	0.0015064	0.027185	0.0053934	-0.024668	0.0054176	-0.010117	0.049772	-0.040221	-0.0064991	-0.016349	-0.016349	0.10332	-0.0034071	-0.019636	0.016261	-0.026495	-0.022022	-0.0033038	0.039762	0.016237	-0.03796	0.024009	0.019244	-0.023405	0.012279	0.0029481	-0.075994	-0.047616	-0.027551	-0.035414	-0.02133	-0.0037364	-0.020346	0.0020384	0.041128	0.032858	0.00079113	0.045882	0.065881	-0.034852	-0.014084	-0.0023391
595	-0.024311	-0.016903	0.57578	-0.005715	-0.026522	-0.037712	-0.018865	0.0011896	0.0268	0.0057074	-0.025028	0.0052754	-0.010006	0.049097	-0.040307	-0.0071495	-0.017025	-0.017025	0.10501	-0.0027844	-0.019553	0.015943	-0.027124	-0.021694	-0.0025966	0.040165	0.016331	-0.038207	0.023804	0.018421	-0.023349	0.012383	0.0026355	-0.076472	-0.04754	-0.028096	-0.035612	-0.021595	-0.0040682	-0.020527	0.0013986	0.040919	0.033546	0.00099568	0.044782	0.06593	-0.034783	-0.014561	-0.0026104
894	-0.02064	-0.012614	0.52735	-0.0096594	-0.019667	-0.035069	-0.018063	0.013939	0.02101	0.0096598	-0.011831	0.017151	-0.001163	0.048629	-0.038559	-0.015796	-0.020419	-0.020419	0.10356	0.010231	-0.011014	0.01453	-0.025367	-0.024988	0.0040831	0.043428	0.015723	-0.033001	0.025064	0.0096846	-0.015383	0.019719	0.0013801	-0.07362	-0.033422	-0.024356	-0.019605	-0.009579	-0.005053	-0.0027227	-0.0053407	0.049484	0.054564	0.0087471	0.03356	0.068034	-0.031602	-0.018649	-0.014442
896	-0.024253	-0.016972	0.57957	-0.0057679	-0.026986	-0.037796	-0.018631	0.0004173	0.027389	0.0050907	-0.025431	0.0045873	-0.010182	0.049817	-0.040236	-0.0063483	-0.016059	-0.016059	0.10422	-0.0040275	-0.020086	0.016109	-0.026899	-0.02207	-0.0034785	0.039765	0.01605	-0.038223	0.023561	0.019245	-0.024013	0.011654	0.0032298	-0.076499	-0.048561	-0.028331	-0.036753	-0.022208	-0.0039208	-0.021146	0.002103	0.04114	0.031817	0.00066938	0.045878	0.065398	-0.034846	-0.014179	-0.0022249
898	-0.022409	-0.020415	0.58556	-0.0049156	-0.024877	-0.035638	-0.019744	0.00018882	0.028966	0.0050441	-0.024332	0.0045543	-0.0081847	0.051427	-0.040677	-0.0042338	-0.015534	-0.015534	0.1039	-0.0048145	-0.020391	0.017438	-0.026279	-0.020807	-0.004956	0.040492	0.018068	-0.035026	0.022211	0.020383	-0.024733	0.010101	0.003899	-0.073796	-0.047042	-0.023503	-0.036362	-0.022586	0.00078889	-0.023734	0.0042301	0.042617	0.030024	0.0010339	0.048807	0.071036	-0.034783	-0.01098	0.0017505
1232	0.0062165	0.0015234	0.33272	-0.018735	-0.0087755	-0.04632	0.0068774	0.0039504	0.055827	0.0095366	-0.0090127	0.021505	-0.010917	0.04423	-0.047401	-0.015498	0.0016589	0.0016589	0.093153	0.039732	0.0013274	0.041441	0.01546	-0.043031	0.028079	0.052021	0.022861	-0.010447	-0.018787	0.0082697	-0.018988	-0.01249	-0.017237	-0.084626	-0.025714	-0.035845	-0.021463	-0.0056287	-0.013303	0.018379	-0.021744	0.027944	0.085885	0.063785	0.064186	0.028924	-0.026581	0.0041349	-0.052087
1234	-0.025885	-0.014554	0.4643	-0.0004329	-0.03199	-0.047659	0.0082115	-0.007341	0.085335	0.015132	-0.038918	0.0095151	-0.016372	0.045034	-0.029124	-0.020007	-0.017023	-0.017023	0.094377	0.0023959	-0.0014801	0.03038	0.010644	-0.0043752	0.0067328	0.049674	0.026155	-0.036255	0.0057439	0.024148	-0.027244	0.008533	-0.015744	-0.081375	-0.040085	-0.00219	-0.0528	-0.037008	0.0034772	-0.004888	-0.010078	0.01214	0.049735	0.045423	0.046055	0.048124	-0.017251	0.0043224	-0.0081829
10575	0	0	0	0	0	0	0	0	0	0	0	0	0	0	0	0	0	0	0	0	0	0	0	0	0	0	0	0	0	0	0	0	0	0	0	0	0	0	0	0	0	0	0	0	0	0	0	0	0
929	-0.021725	-0.010236	0.54037	-0.017638	-0.025598	-0.043035	-0.010705	-0.0058811	0.037162	0.0055386	-0.024374	0.0096213	-0.012441	0.051586	-0.048026	-0.012848	-0.0085773	-0.0085773	0.11218	0.0098432	-0.011562	0.025868	-0.014207	-0.028245	0.0099569	0.046465	0.018625	-0.033634	0.0021112	0.013834	-0.025962	-0.00094245	-0.010344	-0.089731	-0.040412	-0.032375	-0.036083	-0.018342	-0.0066811	-0.0069611	-0.01077	0.036562	0.055448	0.03332	0.058732	0.048686	-0.035493	-0.0034356	-0.025196
948	-0.0221	-0.013271	0.55267	-0.015767	-0.024523	-0.042171	-0.011019	-0.0062708	0.035289	0.0049518	-0.025926	0.0098814	-0.010599	0.051345	-0.046359	-0.011234	-0.01084	-0.01084	0.11561	0.0085606	-0.011603	0.025914	-0.015025	-0.023592	0.0078979	0.046056	0.01873	-0.033224	0.0055383	0.015334	-0.025675	0.00088128	-0.0085008	-0.088068	-0.039914	-0.029394	-0.036525	-0.019086	-0.0040866	-0.0095882	-0.0086135	0.037978	0.051687	0.029275	0.057237	0.051333	-0.036319	-0.0035613	-0.020818
920	-0.022476	-0.012914	0.53622	-0.012148	-0.02692	-0.039154	-0.015151	-0.00043498	0.03089	0.006949	-0.024501	0.0095122	-0.014831	0.051274	-0.047845	-0.011706	-0.014368	-0.014368	0.10573	0.0097461	-0.012757	0.020633	-0.018166	-0.022018	0.0093543	0.044294	0.019247	-0.037831	0.0076564	0.013571	-0.02659	0.0088048	-0.0046943	-0.084655	-0.04096	-0.030425	-0.033272	-0.017142	0.00048959	-0.0072221	-0.010307	0.037668	0.049251	0.025343	0.059329	0.058288	-0.035848	-0.0024701	-0.016969
958	-0.020574	-0.012803	0.5399	-0.0093089	-0.026386	-0.039826	-0.015004	-0.00022405	0.032178	0.0055766	-0.02536	0.0071099	-0.012797	0.050393	-0.045837	-0.0085176	-0.013718	-0.013718	0.106	0.0055476	-0.01691	0.019234	-0.021206	-0.025641	0.0042184	0.044158	0.018827	-0.034954	0.015938	0.016735	-0.024872	0.0057894	-0.0013017	-0.081116	-0.045671	-0.033136	-0.034374	-0.018619	-0.0059633	-0.012907	-0.0042974	0.04001	0.043469	0.016162	0.055843	0.060561	-0.034615	-0.0078666	-0.011176
959	-0.017693	-0.011275	0.5418	-0.0072955	-0.015062	-0.03296	-0.014103	0.013773	0.021752	0.0040044	-0.014051	0.01325	-0.0050493	0.048579	-0.039964	-0.013705	-0.018789	-0.018789	0.097112	0.0072181	-0.015422	0.018019	-0.021466	-0.027167	-0.00074024	0.039965	0.014097	-0.032452	0.028293	0.012268	-0.015803	0.017519	0.0047255	-0.071131	-0.037065	-0.02585	-0.018903	-0.009466	-0.010735	-0.0096294	-0.0013905	0.043072	0.04742	0.0014385	0.038187	0.06903	-0.033985	-0.020954	-0.012017
5788	-0.024696	-0.015287	0.53958	-0.0046201	-0.02935	-0.043081	-0.011012	-0.00164	0.04613	0.0088623	-0.027627	0.0075713	-0.01344	0.05223	-0.041303	-0.01089	-0.014992	-0.014992	0.10175	0.0010714	-0.013303	0.021071	-0.01513	-0.018061	0.0021842	0.04511	0.019435	-0.035045	0.01198	0.020472	-0.0265	0.010634	-0.0050429	-0.079287	-0.04601	-0.021079	-0.041452	-0.026259	0.00093094	-0.012872	-0.0031364	0.034047	0.043522	0.019549	0.048767	0.065137	-0.029916	-0.0052079	-0.0069953
995	-0.026967	-0.018146	0.57187	-0.0034148	-0.029539	-0.041459	-0.013139	-0.0030216	0.041297	0.0074004	-0.028911	0.0046051	-0.011442	0.049226	-0.037377	-0.010563	-0.018072	-0.018072	0.10178	-0.0058649	-0.016825	0.019415	-0.019118	-0.015043	-0.0037569	0.042145	0.017352	-0.039589	0.019061	0.021998	-0.026058	0.013709	-0.0026118	-0.078195	-0.048855	-0.01861	-0.043774	-0.02892	-0.00083043	-0.02032	0.0003119	0.033204	0.035143	0.0076007	0.041299	0.065538	-0.03071	-0.012404	-0.0015527
993	-0.024253	-0.016972	0.57957	-0.0057679	-0.026986	-0.037796	-0.018631	0.0004173	0.027389	0.0050907	-0.025431	0.0045873	-0.010182	0.049817	-0.040236	-0.0063483	-0.016059	-0.016059	0.10422	-0.0040275	-0.020086	0.016109	-0.026899	-0.02207	-0.0034785	0.039765	0.01605	-0.038223	0.023561	0.019245	-0.024013	0.011654	0.0032298	-0.076499	-0.048561	-0.028331	-0.036753	-0.022208	-0.0039208	-0.021146	0.002103	0.04114	0.031817	0.00066938	0.045878	0.065398	-0.034846	-0.014179	-0.0022249
997	-0.023615	-0.019085	0.59146	-0.00571	-0.027073	-0.03881	-0.019838	-0.0018439	0.027806	0.0043833	-0.025835	0.0029333	-0.0099059	0.051474	-0.041121	-0.0049124	-0.015326	-0.015326	0.10687	-0.0059845	-0.021422	0.017271	-0.02672	-0.021628	-0.0039796	0.040353	0.016146	-0.038149	0.018991	0.020572	-0.025902	0.010329	0.002857	-0.075442	-0.050132	-0.026618	-0.039223	-0.024215	-0.0016835	-0.023485	0.0046052	0.041704	0.029066	0.00011679	0.045764	0.06824	-0.034732	-0.013314	-0.00033947
998	-0.024188	-0.018837	0.58367	-0.0050111	-0.027162	-0.038537	-0.01788	-0.00067014	0.02822	0.0052869	-0.024261	0.0044525	-0.0092708	0.052649	-0.040302	-0.0057032	-0.016811	-0.016811	0.10495	-0.005821	-0.020221	0.017475	-0.025995	-0.019547	-0.0036115	0.041387	0.0169	-0.038177	0.019969	0.020434	-0.025581	0.012584	0.00087379	-0.076367	-0.047323	-0.023962	-0.038368	-0.023679	-0.00094863	-0.020958	0.0020771	0.04233	0.031569	0.0011379	0.045689	0.069986	-0.0347	-0.012797	-0.00035752
999	-0.023763	-0.014989	0.5764	-0.0069326	-0.024808	-0.037096	-0.017376	0.0014705	0.026274	0.0041538	-0.024474	0.0052879	-0.010775	0.048927	-0.040384	-0.0078928	-0.016055	-0.016055	0.10279	-0.0029188	-0.020459	0.017514	-0.025149	-0.023279	-0.0032406	0.039455	0.015115	-0.038958	0.02533	0.018223	-0.02303	0.011452	0.0027843	-0.078047	-0.047724	-0.02917	-0.034817	-0.020607	-0.0079513	-0.020183	0.00043583	0.039266	0.03455	0.00022683	0.044343	0.061557	-0.035644	-0.017901	-0.0051042
983	-0.021134	-0.014255	0.57565	-0.0060046	-0.020794	-0.039382	-0.023652	0.0036989	0.025832	0.0088922	-0.024736	-0.0022743	-0.0040831	0.052703	-0.042514	-0.0061276	-0.015881	-0.015881	0.1054	0.0082641	-0.025018	0.021793	-0.032369	-0.017707	-0.006553	0.035913	0.016008	-0.04404	0.0096321	0.016088	-0.023376	0.019644	0.0072118	-0.075539	-0.048487	-0.024158	-0.033016	-0.020792	0.0012211	-0.013114	0.0096736	0.045325	0.027701	-0.0033192	0.047287	0.081059	-0.035337	-0.011768	0.021444
1017	-0.022515	-0.015431	0.60091	-0.0082179	-0.020698	-0.040656	-0.024234	0.00085449	0.025138	0.010219	-0.025062	-0.0043498	-0.0029592	0.053068	-0.042009	-0.0079687	-0.014813	-0.014813	0.10661	0.006358	-0.025638	0.02319	-0.032425	-0.018789	-0.0077016	0.035152	0.01452	-0.045619	0.0046156	0.015981	-0.023475	0.019087	0.0065237	-0.076272	-0.04963	-0.02395	-0.035609	-0.023558	0.0027782	-0.015003	0.011282	0.043803	0.027085	-0.0033273	0.043748	0.081778	-0.035653	-0.013362	0.019512
1019	-0.022424	-0.014641	0.57481	-0.0057323	-0.022874	-0.038721	-0.020794	0.0028057	0.026439	0.0065022	-0.025319	0.00018179	-0.0061823	0.051708	-0.041267	-0.0062428	-0.016012	-0.016012	0.10504	0.0034074	-0.023565	0.020003	-0.029523	-0.019527	-0.005249	0.037033	0.016027	-0.041696	0.017027	0.017048	-0.023281	0.016231	0.0065596	-0.076579	-0.049102	-0.027353	-0.034045	-0.020807	-0.0034337	-0.01681	0.0059586	0.043183	0.029069	-0.0022187	0.046422	0.073016	-0.035212	-0.01409	0.011514
1020	-0.022993	-0.016277	0.5985	-0.0081615	-0.021232	-0.039717	-0.02322	0.00019069	0.025791	0.0097957	-0.025038	-0.0032063	-0.0038922	0.051506	-0.041492	-0.0074337	-0.014885	-0.014885	0.10519	0.0055669	-0.025428	0.022621	-0.031334	-0.019153	-0.0079024	0.036161	0.015399	-0.045079	0.0066895	0.017217	-0.023816	0.018665	0.0047668	-0.076659	-0.049752	-0.023552	-0.036359	-0.023923	0.0027512	-0.015419	0.010165	0.042935	0.02683	-0.0029198	0.045206	0.080058	-0.035669	-0.013174	0.018895
1021	-0.022507	-0.015122	0.57018	-0.006385	-0.022654	-0.038582	-0.020529	0.0034844	0.026206	0.0059828	-0.023957	0.0016672	-0.0045001	0.050901	-0.03968	-0.0059394	-0.015695	-0.015695	0.10281	0.0032987	-0.023214	0.021261	-0.028068	-0.018102	-0.0045542	0.038079	0.016515	-0.040457	0.02064	0.017485	-0.02254	0.018703	0.003658	-0.076797	-0.049066	-0.026843	-0.034581	-0.020855	-0.0027525	-0.014556	0.0052473	0.042899	0.028754	-0.0018078	0.04532	0.071929	-0.03479	-0.014343	0.010495
1022	-0.021924	-0.018148	0.58978	-0.0078137	-0.019513	-0.036727	-0.023224	0.0022951	0.025664	0.0096601	-0.020634	-0.0021489	0.001128	0.055036	-0.040713	-0.005493	-0.015422	-0.015422	0.10499	0.0057606	-0.024362	0.023753	-0.032207	-0.018287	-0.0075622	0.037689	0.017155	-0.042271	0.0093174	0.016249	-0.022607	0.020041	0.0052575	-0.075741	-0.046699	-0.021319	-0.033255	-0.022036	0.0042721	-0.012427	0.0089038	0.050621	0.02718	-0.0031389	0.044227	0.086534	-0.036299	-0.012852	0.023557
1050	-0.020044	-0.027234	0.58727	-0.0032499	-0.02124	-0.031009	-0.021642	0.0037366	0.029402	0.0046299	-0.023277	0.0090488	-0.0028347	0.056027	-0.042539	-0.0023188	-0.016167	-0.016167	0.11428	-0.0030811	-0.017642	0.015057	-0.029589	-0.018639	-0.0028006	0.04632	0.021237	-0.030037	0.023907	0.018839	-0.023588	0.0093796	0.0064514	-0.066132	-0.042924	-0.019457	-0.030026	-0.020045	0.0074651	-0.022859	0.0085011	0.045889	0.031513	0.001657	0.048846	0.090476	-0.034665	-0.0011204	0.00068262
60489	-0.035922	-0.022106	0.6393	-0.011508	-0.026421	-0.037495	-0.017325	-0.0077456	0.030423	0.0065694	-0.027108	0.0041368	-0.0083957	0.056086	-0.040873	-0.016222	-0.017269	-0.017269	0.10941	-0.0075736	-0.018261	0.021902	-0.023998	-0.015669	-0.0046636	0.038419	0.0089542	-0.048217	0.0024233	0.014573	-0.030321	0.010808	-0.0013764	-0.08484	-0.047135	-0.019859	-0.044021	-0.027397	0.0011767	-0.022758	-0.0024699	0.032424	0.036023	0.0064782	0.032868	0.062878	-0.039348	-0.014214	-0.015211
1111	-0.021708	-0.014856	0.57376	-0.0054898	-0.021833	-0.038956	-0.02226	0.0035992	0.026325	0.0080054	-0.024804	-0.00083535	-0.0045167	0.05259	-0.041799	-0.0059696	-0.016036	-0.016036	0.10527	0.005856	-0.024039	0.020934	-0.030793	-0.017807	-0.0057316	0.036592	0.016575	-0.042518	0.013143	0.016731	-0.023204	0.018445	0.0069792	-0.075612	-0.048505	-0.025042	-0.033364	-0.020861	-0.00018572	-0.014882	0.0081338	0.044565	0.027986	-0.0026923	0.047114	0.078112	-0.034961	-0.01225	0.016992
11200	-0.023545	-0.014529	0.56518	-0.0055936	-0.0225	-0.039045	-0.020444	0.0046385	0.024081	0.007618	-0.023445	0.0019486	-0.0059698	0.050129	-0.041692	-0.0085566	-0.017431	-0.017431	0.10256	0.0040087	-0.021915	0.018478	-0.030294	-0.019846	-0.0041428	0.037071	0.015135	-0.042123	0.016233	0.0157	-0.021771	0.017761	0.0057252	-0.077082	-0.046931	-0.027384	-0.032644	-0.019774	-0.0023369	-0.01349	0.0036828	0.044344	0.032687	-0.0012792	0.04419	0.071815	-0.033861	-0.015102	0.0091114
1123	-0.018134	-0.010071	0.54738	-0.0097869	-0.016522	-0.034924	-0.015217	0.010234	0.022656	0.0043488	-0.015173	0.013222	-0.0057483	0.047417	-0.040013	-0.014001	-0.017672	-0.017672	0.10051	0.0071989	-0.016473	0.019732	-0.020961	-0.026375	0.00051608	0.041954	0.013845	-0.036062	0.027183	0.011833	-0.017927	0.016848	0.0012605	-0.077088	-0.038109	-0.026	-0.023053	-0.011381	-0.012373	-0.0095282	-0.0038951	0.042363	0.04858	0.0034768	0.036774	0.060129	-0.03385	-0.02367	-0.013521
8646	-0.023955	-0.015964	0.58188	-0.0063962	-0.025933	-0.03771	-0.018083	1.29e-05	0.02689	0.00379	-0.02581	0.003585	-0.011233	0.049114	-0.040449	-0.0067776	-0.015799	-0.015799	0.1037	-0.003847	-0.021419	0.017056	-0.02596	-0.023111	-0.0040372	0.03892	0.014989	-0.039237	0.024673	0.018844	-0.024108	0.010513	0.003156	-0.077767	-0.049379	-0.029787	-0.036678	-0.021941	-0.0072297	-0.021571	0.0015162	0.03961	0.032041	-0.00037856	0.045333	0.062489	-0.035676	-0.016655	-0.0036624
51085	-0.021881	-0.026962	0.59543	-0.0042706	-0.021108	-0.03238	-0.019683	0.0011821	0.027225	0.0052123	-0.023075	0.0087264	-0.0026715	0.054665	-0.04252	-0.0050899	-0.016031	-0.016031	0.11706	-0.002362	-0.017347	0.016107	-0.028323	-0.019569	-0.0018992	0.045149	0.01975	-0.031465	0.022195	0.016917	-0.023469	0.0083331	0.0049128	-0.069639	-0.042628	-0.022446	-0.030897	-0.01995	0.0045647	-0.021829	0.0051829	0.044738	0.03566	0.0040539	0.047163	0.084942	-0.034776	-0.0032784	-0.0053026
56616	-0.019405	-0.010845	0.54792	-0.0096536	-0.017208	-0.035423	-0.014989	0.0094341	0.022485	0.0044099	-0.015684	0.012938	-0.005935	0.047664	-0.040083	-0.014119	-0.017985	-0.017985	0.10119	0.0070698	-0.01649	0.019852	-0.020493	-0.025976	0.00096683	0.041476	0.01408	-0.036427	0.027269	0.012248	-0.017782	0.016801	0.001208	-0.077735	-0.038505	-0.025825	-0.023983	-0.012156	-0.012331	-0.0094222	-0.0043174	0.041588	0.048644	0.0036739	0.036929	0.059356	-0.034133	-0.02353	-0.014077
329	-0.025791	-0.02058	0.59051	-0.0073121	-0.026095	-0.032282	-0.023436	-0.00081775	0.027437	0.0041605	-0.025036	0.0048966	-0.0099729	0.051457	-0.042023	-0.0056271	-0.016736	-0.016736	0.10445	-0.0048474	-0.021202	0.01765	-0.02823	-0.016525	-0.0038006	0.039578	0.016239	-0.041811	0.016478	0.018417	-0.028395	0.012407	0.003048	-0.077236	-0.047666	-0.022586	-0.037592	-0.022164	0.0028894	-0.023633	0.0023854	0.040518	0.026708	-0.00042774	0.047882	0.069922	-0.039208	-0.010523	0.0006649
3725	-0.020373	-0.030615	0.58989	-0.002846	-0.020921	-0.028513	-0.023246	0.0019931	0.030113	0.0053867	-0.023561	0.0095974	-0.0030462	0.056372	-0.041409	0.00025508	-0.015529	-0.015529	0.11692	-0.0048536	-0.017564	0.01444	-0.02901	-0.016444	-0.0035592	0.0472	0.023126	-0.027971	0.023089	0.020656	-0.023271	0.010117	0.0052637	-0.063816	-0.042678	-0.015695	-0.030884	-0.021095	0.014102	-0.023745	0.0090061	0.047752	0.028978	0.0019498	0.05851	0.093252	-0.034888	0.0075662	0.005599
1452	-0.021534	-0.013595	0.574	-0.0064157	-0.020978	-0.039322	-0.02275	0.0036568	0.025558	0.0080066	-0.024905	-0.0019066	-0.0045591	0.052124	-0.042195	-0.0068952	-0.015965	-0.015965	0.10541	0.0076277	-0.024893	0.021623	-0.031707	-0.018747	-0.0061086	0.035669	0.015554	-0.043954	0.011895	0.015637	-0.022586	0.018759	0.0074588	-0.076426	-0.048772	-0.026169	-0.032743	-0.020355	-0.0014754	-0.01377	0.0085811	0.044478	0.028637	-0.0032744	0.046253	0.077639	-0.035535	-0.013698	0.018136
1455	-0.019999	0.0070935	0.60766	-0.02532	-0.0036778	-0.052291	-0.024039	-0.00065149	0.013411	0.015718	-0.01877	-0.017853	0.018502	0.04305	-0.038488	-0.026682	-0.011993	-0.011993	0.11602	0.042183	-0.033751	0.041073	-0.030527	-0.02778	-0.0085155	0.018502	-0.00040256	-0.066121	-0.02014	-0.003281	-0.02178	0.024997	0.0028442	-0.096414	-0.049031	-0.035355	-0.027249	-0.017142	-0.024225	0.011399	-0.001096	0.031894	0.04117	-0.00072326	0.019004	0.056097	-0.041	-0.036225	0.019485
1456	-0.01981	0.0075495	0.61811	-0.025285	-0.0041446	-0.05284	-0.024445	-0.0020253	0.01369	0.015563	-0.019696	-0.01813	0.014995	0.041418	-0.039942	-0.027442	-0.012162	-0.012162	0.11593	0.043801	-0.034174	0.041066	-0.031437	-0.029169	-0.0096207	0.018638	-0.0018144	-0.06722	-0.021017	-0.0028947	-0.023217	0.023781	0.0020256	-0.097252	-0.049032	-0.03503	-0.028455	-0.017324	-0.025172	0.012094	-0.0025687	0.031021	0.042954	3.86e-06	0.01913	0.05491	-0.041791	-0.036386	0.020238
1457	-0.022756	-0.01338	0.56923	-0.0061664	-0.022122	-0.037942	-0.02006	0.0034364	0.025295	0.0060873	-0.024409	0.0014953	-0.0069188	0.050054	-0.040895	-0.0078749	-0.01643	-0.01643	0.10349	0.003812	-0.023073	0.020102	-0.028498	-0.020978	-0.0047374	0.03722	0.015531	-0.042185	0.018942	0.016148	-0.022002	0.016482	0.0051907	-0.07791	-0.047989	-0.028216	-0.032749	-0.01968	-0.0055461	-0.015531	0.0040324	0.041944	0.031585	-0.0021208	0.044806	0.069513	-0.035613	-0.016792	0.0091341
138000	0	0	0	0	0	0	0	0	0	0	0	0	0	0	0	0	0	0	0	0	0	0	0	0	0	0	0	0	0	0	0	0	0	0	0	0	0	0	0	0	0	0	0	0	0	0	0	0	0
9575	-0.020812	-0.033844	0.64071	-0.011959	-0.017835	-0.03431	-0.02025	-0.0088902	0.02984	0.0035245	-0.02494	0.0097728	0.006397	0.055067	-0.043132	-0.0060116	-0.014703	-0.014703	0.1336	-0.0051124	-0.016428	0.020769	-0.027477	-0.021199	-0.0013203	0.051403	0.021315	-0.028594	0.013672	0.016609	-0.027189	-0.00096299	0.0017074	-0.072501	-0.039683	-0.017389	-0.032095	-0.023565	0.0079338	-0.027112	0.0037367	0.041994	0.03817	0.010489	0.045915	0.09266	-0.036527	0.0030344	-0.010681
4094	0	0	0	0	0	0	0	0	0	0	0	0	0	0	0	0	0	0	0	0	0	0	0	0	0	0	0	0	0	0	0	0	0	0	0	0	0	0	0	0	0	0	0	0	0	0	0	0	0
4609	-0.021126	-0.023338	0.57983	-0.0041489	-0.021274	-0.031612	-0.020271	0.0046342	0.028105	0.0047985	-0.022655	0.0091668	-0.0052253	0.054351	-0.041819	-0.0044722	-0.016318	-0.016318	0.1107	-0.0019018	-0.017469	0.015728	-0.028098	-0.020287	-0.0023377	0.04429	0.019516	-0.032127	0.025498	0.01769	-0.022187	0.010699	0.0056371	-0.06917	-0.042919	-0.022165	-0.029395	-0.018695	0.0028955	-0.020697	0.0059602	0.044433	0.034259	0.0017121	0.046678	0.082668	-0.035239	-0.0062901	-0.0020192
1073	-0.019405	-0.010845	0.54792	-0.0096536	-0.017208	-0.035423	-0.014989	0.0094341	0.022485	0.0044099	-0.015684	0.012938	-0.005935	0.047664	-0.040083	-0.014119	-0.017985	-0.017985	0.10119	0.0070698	-0.01649	0.019852	-0.020493	-0.025976	0.00096683	0.041476	0.01408	-0.036427	0.027269	0.012248	-0.017782	0.016801	0.001208	-0.077735	-0.038505	-0.025825	-0.023983	-0.012156	-0.012331	-0.0094222	-0.0043174	0.041588	0.048644	0.0036739	0.036929	0.059356	-0.034133	-0.02353	-0.014077
50820	0	0	0	0	0	0	0	0	0	0	0	0	0	0	0	0	0	0	0	0	0	0	0	0	0	0	0	0	0	0	0	0	0	0	0	0	0	0	0	0	0	0	0	0	0	0	0	0	0
1385	-0.019281	-0.029387	0.59399	-0.0027118	-0.022356	-0.033109	-0.023046	0.00081577	0.031478	0.0056705	-0.024306	0.0074877	-0.0028752	0.055532	-0.041702	0.00054943	-0.015848	-0.015848	0.11191	-0.0059605	-0.019255	0.015492	-0.029299	-0.016086	-0.0043507	0.046841	0.023143	-0.029347	0.020448	0.022099	-0.0264	0.0095469	0.0049774	-0.065359	-0.044543	-0.015546	-0.034422	-0.023943	0.012886	-0.025776	0.0093877	0.045806	0.02652	0.0011633	0.053511	0.093223	-0.033484	0.0014816	0.0069295
1390	-0.02203	-0.024079	0.58701	-0.0047904	-0.023345	-0.031744	-0.020499	0.0012723	0.029634	0.0049323	-0.023385	0.0061436	-0.0062322	0.054029	-0.041667	-0.0035502	-0.015063	-0.015063	0.10853	-0.0035947	-0.018693	0.016515	-0.028537	-0.020289	-0.0042811	0.042225	0.019103	-0.032659	0.023062	0.019637	-0.02363	0.0092991	0.0056081	-0.070474	-0.044967	-0.022204	-0.03341	-0.021113	0.0035553	-0.022733	0.0068175	0.045928	0.03122	0.0019947	0.048777	0.079584	-0.035232	-0.0063779	0.0010508
1398	-0.023306	-0.015987	0.57878	-0.0058019	-0.025534	-0.037189	-0.01766	0.0012746	0.026914	0.0042737	-0.025038	0.0046556	-0.011009	0.049384	-0.040439	-0.0066822	-0.016177	-0.016177	0.10279	-0.0036222	-0.02047	0.016876	-0.025795	-0.022433	-0.0039123	0.039694	0.0158	-0.038397	0.024427	0.019222	-0.02368	0.011447	0.0029722	-0.076571	-0.048075	-0.028254	-0.035411	-0.021168	-0.0056087	-0.021378	0.0019967	0.039915	0.03265	0.00013755	0.045769	0.064384	-0.035118	-0.015414	-0.0028756
1399	-0.019947	-0.012756	0.53968	-0.0091563	-0.026258	-0.03963	-0.014537	-0.00021326	0.032945	0.0052604	-0.025195	0.0072001	-0.013281	0.051047	-0.046122	-0.0078013	-0.012928	-0.012928	0.10446	0.0049697	-0.016863	0.019593	-0.020424	-0.025647	0.0037043	0.044332	0.019087	-0.034537	0.015314	0.017547	-0.025332	0.0054657	-0.0013324	-0.080745	-0.045617	-0.032318	-0.034657	-0.018656	-0.0050709	-0.012666	-0.003824	0.040221	0.042788	0.016637	0.057531	0.060904	-0.034447	-0.0067748	-0.01064
1409	-0.023854	-0.016381	0.58137	-0.0065045	-0.026076	-0.037649	-0.018003	-0.00014448	0.026866	0.0035558	-0.025716	0.0035825	-0.010999	0.049256	-0.040305	-0.0066693	-0.01576	-0.01576	0.10379	-0.0039987	-0.021312	0.017032	-0.02603	-0.022795	-0.0042023	0.039067	0.015271	-0.039128	0.024543	0.018884	-0.02401	0.01046	0.003109	-0.077557	-0.049332	-0.029819	-0.036854	-0.022047	-0.0072399	-0.022133	0.0015484	0.039597	0.031685	-0.00031768	0.045337	0.062248	-0.035548	-0.016976	-0.0036782
1436	-0.020337	-0.0085841	0.52695	-0.0057589	-0.01998	-0.04098	-0.017323	0.0081021	0.027759	0.008103	-0.022186	0.004176	-0.012151	0.050738	-0.047778	-0.01061	-0.014702	-0.014702	0.10015	0.014563	-0.018652	0.019778	-0.026347	-0.02755	0.0020958	0.039624	0.014231	-0.038084	0.011143	0.012222	-0.022665	0.011577	0.0039681	-0.079912	-0.043465	-0.032526	-0.02743	-0.014328	-0.0070051	-0.0040395	-0.0033662	0.043422	0.045611	0.010978	0.051487	0.065988	-0.035311	-0.010174	-0.0020328
1445	-0.025547	-0.014098	0.5672	-0.0041117	-0.025186	-0.042739	-0.015358	-0.00079975	0.03977	0.0084755	-0.028856	0.00025952	-0.0088629	0.049201	-0.038537	-0.01151	-0.018166	-0.018166	0.10184	0.0033639	-0.020742	0.023253	-0.022399	-0.015167	-0.0060174	0.039241	0.015738	-0.044079	0.014133	0.019114	-0.025518	0.017944	0.000638	-0.0798	-0.049514	-0.01892	-0.041063	-0.027092	-0.0027851	-0.013676	0.0023706	0.035042	0.034582	0.0045077	0.040788	0.070729	-0.032139	-0.014084	0.014749
1482	-0.020954	-0.02647	0.58153	-0.0037223	-0.02109	-0.031237	-0.020994	0.0048999	0.029213	0.0050294	-0.021836	0.0097112	-0.0037257	0.056197	-0.04226	-0.0036266	-0.016247	-0.016247	0.11254	-0.0015122	-0.016527	0.015386	-0.02913	-0.018278	-0.0020722	0.045614	0.021292	-0.030231	0.024014	0.017912	-0.021452	0.011256	0.0052795	-0.06674	-0.042476	-0.020311	-0.029541	-0.019408	0.006782	-0.020276	0.0079686	0.047524	0.033968	0.0027828	0.048402	0.088471	-0.034133	-0.0025142	-0.00099728
1487	-0.02324	-0.017794	0.58534	-0.0065012	-0.023996	-0.036835	-0.018484	0.0016944	0.027796	0.0046958	-0.02337	0.0055018	-0.0090733	0.050326	-0.040241	-0.0059432	-0.015409	-0.015409	0.10236	-0.0033509	-0.019774	0.018214	-0.025138	-0.021809	-0.0041583	0.040659	0.016791	-0.037078	0.023726	0.018923	-0.023531	0.012449	0.0016381	-0.076369	-0.046665	-0.02606	-0.035542	-0.02178	-0.0031352	-0.020261	0.0021719	0.04153	0.032867	0.0013019	0.045855	0.066563	-0.034759	-0.014692	-0.002525
5932	-0.024074	-0.023933	0.58411	-0.0027645	-0.025698	-0.035718	-0.018186	-0.00099399	0.035754	0.0068344	-0.025222	0.0061187	-0.0091011	0.053369	-0.040363	-0.0046452	-0.016331	-0.016331	0.10543	-0.0059748	-0.017047	0.017633	-0.024922	-0.016041	-0.0044156	0.043549	0.019744	-0.033712	0.018925	0.022589	-0.026011	0.011836	0.0018503	-0.071643	-0.046191	-0.016292	-0.0391	-0.025713	0.0071505	-0.021429	0.005198	0.041629	0.031646	0.0045357	0.047555	0.083634	-0.03288	-0.0050834	0.0028322
1499	-0.021501	-0.016911	0.56246	-0.008898	-0.023676	-0.036701	-0.015777	0.0020948	0.028149	0.0075	-0.0231	0.010735	-0.0099214	0.052673	-0.0429	-0.0096069	-0.015913	-0.015913	0.10747	0.0059889	-0.01359	0.019054	-0.019503	-0.02321	0.0040207	0.043959	0.019433	-0.034624	0.019667	0.015681	-0.021808	0.012197	-0.00045225	-0.077198	-0.040108	-0.026163	-0.030304	-0.017431	4.81e-05	-0.01188	-0.0040082	0.040751	0.045671	0.015812	0.050209	0.066753	-0.033628	-0.0082648	-0.010025
1509	0	0	0	0	0	0	0	0	0	0	0	0	0	0	0	0	0	0	0	0	0	0	0	0	0	0	0	0	0	0	0	0	0	0	0	0	0	0	0	0	0	0	0	0	0	0	0	0	0
8454	-0.019405	-0.010845	0.54792	-0.0096536	-0.017208	-0.035423	-0.014989	0.0094341	0.022485	0.0044099	-0.015684	0.012938	-0.005935	0.047664	-0.040083	-0.014119	-0.017985	-0.017985	0.10119	0.0070698	-0.01649	0.019852	-0.020493	-0.025976	0.00096683	0.041476	0.01408	-0.036427	0.027269	0.012248	-0.017782	0.016801	0.001208	-0.077735	-0.038505	-0.025825	-0.023983	-0.012156	-0.012331	-0.0094222	-0.0043174	0.041588	0.048644	0.0036739	0.036929	0.059356	-0.034133	-0.02353	-0.014077
7852	-0.012816	-0.011904	0.51877	-0.0083591	-0.023372	-0.03869	-0.013685	0.0033021	0.034511	0.0066861	-0.022978	0.010839	-0.014105	0.05257	-0.045558	-0.0079236	-0.012579	-0.012579	0.10199	0.0082606	-0.013672	0.024079	-0.015368	-0.025726	0.0070239	0.045541	0.021124	-0.031688	0.015305	0.016457	-0.022944	0.0085556	-0.0024556	-0.078732	-0.041307	-0.029909	-0.030406	-0.016049	-0.0022799	-0.0078586	-0.005259	0.040963	0.0473	0.020532	0.058051	0.062993	-0.033422	-0.0052788	-0.012012
54205	-0.029013	-0.02011	0.60477	-0.006474	-0.031032	-0.039263	-0.015121	-0.0065638	0.042444	0.0082777	-0.031396	0.0017664	-0.01185	0.048951	-0.038593	-0.010691	-0.01753	-0.01753	0.10513	-0.0095318	-0.018495	0.02041	-0.019762	-0.013592	-0.0070688	0.040781	0.016381	-0.043918	0.010562	0.022841	-0.031071	0.011118	-0.0040692	-0.079514	-0.050018	-0.015565	-0.048601	-0.032548	0.0028444	-0.026033	0.0006449	0.031492	0.028252	0.0070593	0.041493	0.067639	-0.031939	-0.0093464	-0.00025238
1588	-0.034281	-0.023667	0.71198	-0.020391	-0.026907	-0.044298	-0.018708	-0.017545	0.02429	0.013806	-0.029031	-0.00088611	-0.002964	0.045042	-0.039102	-0.012308	-0.010478	-0.010478	0.1248	-0.014709	-0.01791	0.024634	-0.023086	-0.026228	-0.0051477	0.038874	0.011593	-0.046579	-0.0063359	0.017776	-0.03527	-0.00071149	-0.011927	-0.087653	-0.048165	-0.022949	-0.049605	-0.033152	0.0023163	-0.033315	-0.0068209	0.031224	0.03021	0.011487	0.037676	0.053673	-0.038468	-0.0091348	-0.014588
25802	0	0	0	0	0	0	0	0	0	0	0	0	0	0	0	0	0	0	0	0	0	0	0	0	0	0	0	0	0	0	0	0	0	0	0	0	0	0	0	0	0	0	0	0	0	0	0	0	0
28503	0	0	0	0	0	0	0	0	0	0	0	0	0	0	0	0	0	0	0	0	0	0	0	0	0	0	0	0	0	0	0	0	0	0	0	0	0	0	0	0	0	0	0	0	0	0	0	0	0
397	0	0	0	0	0	0	0	0	0	0	0	0	0	0	0	0	0	0	0	0	0	0	0	0	0	0	0	0	0	0	0	0	0	0	0	0	0	0	0	0	0	0	0	0	0	0	0	0	0
1600	0	0	0	0	0	0	0	0	0	0	0	0	0	0	0	0	0	0	0	0	0	0	0	0	0	0	0	0	0	0	0	0	0	0	0	0	0	0	0	0	0	0	0	0	0	0	0	0	0
1605	-0.021113	-0.01709	0.57634	-0.0062635	-0.024646	-0.03718	-0.018143	0.001261	0.026985	0.0044219	-0.023278	0.0063972	-0.010692	0.048804	-0.041172	-0.0068212	-0.016138	-0.016138	0.10205	-0.0023522	-0.019649	0.017986	-0.02422	-0.021425	-0.0039402	0.040818	0.016226	-0.0388	0.022729	0.019156	-0.024166	0.012853	0.00088149	-0.076812	-0.045708	-0.024602	-0.035371	-0.021036	-0.0042786	-0.019349	0.00082899	0.040592	0.034359	0.0013023	0.046269	0.064894	-0.034929	-0.015743	-0.0032565
84152	-0.023984	-0.022688	0.66801	-0.019933	-0.028982	-0.054885	-0.015729	-0.028989	0.025729	0.0024981	-0.029899	0.00111	-0.0050699	0.039233	-0.042645	-0.010432	-0.010692	-0.010692	0.13195	-0.010956	-0.025611	0.027242	-0.020487	-0.024103	-0.0061146	0.041722	0.012181	-0.046909	-0.0017158	0.020931	-0.038512	-0.001143	-0.018082	-0.095185	-0.051986	-0.022762	-0.052209	-0.033064	-0.0081124	-0.026978	-0.0067025	0.032554	0.032088	0.014538	0.052539	0.037271	-0.036764	-0.0074661	-0.015126
1616	-0.021208	-0.013659	0.54776	-0.0075207	-0.023019	-0.03741	-0.016124	0.0051335	0.026921	0.0063335	-0.022524	0.0090155	-0.011455	0.051297	-0.043561	-0.010071	-0.016355	-0.016355	0.10288	0.0046034	-0.015809	0.018175	-0.021983	-0.024069	0.003159	0.041963	0.017199	-0.035815	0.02094	0.015101	-0.021311	0.011956	0.00080344	-0.077556	-0.042368	-0.029474	-0.029994	-0.016643	-0.0038691	-0.01213	-0.0031826	0.041227	0.043856	0.010825	0.0484	0.064139	-0.03372	-0.012211	-0.010096
5694	-0.039232	-0.021414	0.71263	-0.012096	-0.024067	-0.055243	0.00033585	-0.040756	0.029046	0.0069368	-0.016036	0.032302	-0.0028866	0.058962	-0.036527	-0.026299	-0.0086702	-0.0086702	0.11556	-0.016738	-0.024449	0.035365	-0.0068698	-0.033755	-0.0085426	0.038728	-0.0071031	-0.054489	-0.0085246	0.026177	-0.03861	0.037059	-0.030512	-0.10093	-0.022126	0.027063	-0.047846	-0.023416	-0.017409	-0.016026	-0.015931	0.022563	0.053303	0.012512	0.011668	0.028711	-0.041775	-0.037211	-0.033463
1040	-0.032132	-0.017843	0.72926	-0.026702	-0.020779	-0.055244	-0.018273	-0.026785	0.020558	0.010079	-0.027958	-0.010665	0.0034108	0.050186	-0.038383	-0.020842	-0.008082	-0.008082	0.12392	-0.0093199	-0.025708	0.034411	-0.024538	-0.030024	-0.0075285	0.032803	0.0032398	-0.052849	-0.017936	0.013228	-0.028117	0.0028356	-0.0070772	-0.091602	-0.05311	-0.029746	-0.049472	-0.035717	-0.0084113	-0.027585	0.0023528	0.027792	0.034748	0.006148	0.021279	0.048016	-0.037508	-0.030804	-0.015278
1730	-0.018484	-0.01204	0.54677	-0.0070051	-0.015881	-0.033823	-0.013665	0.012059	0.022649	0.0043912	-0.014976	0.013431	-0.0056105	0.048709	-0.039984	-0.013339	-0.018446	-0.018446	0.099296	0.0079812	-0.015716	0.018832	-0.021009	-0.026204	0.0003271	0.040854	0.014537	-0.033893	0.02819	0.013404	-0.016567	0.016932	0.0034121	-0.073013	-0.037468	-0.024826	-0.020395	-0.010207	-0.010226	-0.00986	-0.0015489	0.042755	0.048145	0.0028456	0.038322	0.064399	-0.033562	-0.020429	-0.011323
22943	-0.02034	-0.013138	0.54129	-0.0085644	-0.025061	-0.038069	-0.013741	0.0024519	0.031258	0.0057197	-0.023978	0.0083389	-0.012803	0.052158	-0.044986	-0.0084057	-0.013841	-0.013841	0.10283	0.0052855	-0.015885	0.019283	-0.019677	-0.025405	0.0040502	0.043351	0.018906	-0.033894	0.018077	0.017673	-0.023048	0.0080091	-0.0002071	-0.078272	-0.043793	-0.031142	-0.031674	-0.017143	-0.0038906	-0.011997	-0.0031073	0.040448	0.043866	0.015925	0.055809	0.062858	-0.033758	-0.0070857	-0.0090616
5591	-0.021611	-0.013905	0.57321	-0.0063905	-0.020539	-0.038872	-0.022928	0.0039015	0.025462	0.0083464	-0.024411	-0.0011916	-0.004518	0.052019	-0.041893	-0.0067762	-0.01587	-0.01587	0.1051	0.0079049	-0.024547	0.021682	-0.031371	-0.018703	-0.0059027	0.036057	0.01579	-0.043797	0.012286	0.015577	-0.022589	0.019165	0.0065814	-0.076621	-0.048098	-0.025603	-0.032511	-0.020194	-0.00080026	-0.013133	0.0079841	0.044221	0.029216	-0.0031698	0.046353	0.07768	-0.035813	-0.013785	0.018348
1793	-0.023993	-0.020502	0.59123	-0.0057893	-0.027135	-0.038028	-0.01951	-0.0032961	0.026515	0.0026915	-0.027017	0.0037428	-0.010443	0.050179	-0.040879	-0.0047513	-0.01535	-0.01535	0.11329	-0.0071777	-0.021975	0.015914	-0.025772	-0.020454	-0.0044981	0.040301	0.016398	-0.037077	0.020634	0.020614	-0.02463	0.010362	0.001934	-0.074992	-0.049544	-0.02633	-0.039373	-0.023937	3.91e-05	-0.023802	0.0022896	0.041746	0.029062	0.00026282	0.058945	0.064855	-0.035035	-0.0026363	0.00090967
7027	-0.022676	-0.018839	0.58424	-0.006522	-0.023685	-0.035269	-0.01988	0.00046292	0.026874	0.0038939	-0.024125	0.0039391	-0.0077218	0.051301	-0.040508	-0.0056013	-0.015347	-0.015347	0.10459	-0.0040425	-0.021141	0.017598	-0.026535	-0.022886	-0.0043401	0.03948	0.016436	-0.035249	0.024032	0.01797	-0.023254	0.0090626	0.0043751	-0.076	-0.046777	-0.027597	-0.034829	-0.021377	-0.003693	-0.02361	0.002189	0.04114	0.032199	0.00029647	0.046281	0.066361	-0.035665	-0.015451	-0.002001
11218	-0.023318	-0.020097	0.58606	-0.0043016	-0.027208	-0.037879	-0.018805	-0.00034786	0.02849	0.0048143	-0.024094	0.0041175	-0.0090726	0.052689	-0.040918	-0.0039276	-0.016193	-0.016193	0.10441	-0.0062743	-0.020095	0.017007	-0.026977	-0.018828	-0.0044883	0.041388	0.018015	-0.037594	0.020132	0.021375	-0.025669	0.012617	0.0023763	-0.074696	-0.047804	-0.02371	-0.038559	-0.024151	0.00088857	-0.021539	0.0039412	0.044097	0.02878	0.00034133	0.047774	0.072203	-0.034055	-0.010517	0.0023109
8718	-0.021582	-0.012155	0.59123	-0.02117	-0.028949	-0.052034	-0.0091238	-0.025139	0.039033	0.0058334	-0.028819	0.0036615	-0.010537	0.039659	-0.049681	-0.012194	-0.0061802	-0.0061802	0.12168	0.0026421	-0.019075	0.030842	-0.014627	-0.02974	0.0046114	0.048588	0.017996	-0.041804	-0.010875	0.018867	-0.038232	-0.007966	-0.020023	-0.10287	-0.047064	-0.030247	-0.049974	-0.028734	-0.012541	-0.013951	-0.016869	0.02963	0.050024	0.032317	0.060431	0.035684	-0.037363	-0.0051123	-0.026014
8797	-0.021166	-0.011977	0.55057	-0.011463	-0.0261	-0.041784	-0.013431	-0.0032687	0.032781	0.006313	-0.025044	0.0074468	-0.013375	0.049805	-0.04617	-0.0099072	-0.011862	-0.011862	0.10731	0.0057232	-0.016356	0.021866	-0.018213	-0.027088	0.0051472	0.044346	0.018686	-0.035889	0.011759	0.01662	-0.026081	0.0056155	-0.0051599	-0.085058	-0.0444	-0.031399	-0.035827	-0.019624	-0.0061708	-0.011181	-0.0075925	0.037416	0.046886	0.020612	0.056743	0.056051	-0.034844	-0.0075537	-0.015159
8795	-0.022753	-0.014704	0.58388	-0.010858	-0.027319	-0.042083	-0.015399	-0.0069598	0.030209	0.0047777	-0.027202	0.0039865	-0.011371	0.04774	-0.043918	-0.0086592	-0.013656	-0.013656	0.10959	-0.00085643	-0.020534	0.021062	-0.021737	-0.024647	-0.00021273	0.042483	0.016975	-0.040103	0.014859	0.018911	-0.02827	0.0065468	-0.0037453	-0.085198	-0.048648	-0.030081	-0.040254	-0.023459	-0.0078151	-0.018413	-0.0046333	0.037515	0.038881	0.011552	0.052372	0.056686	-0.035559	-0.012304	-0.010072
30818	-0.020201	-0.027274	0.64829	-0.024173	-0.010997	-0.034637	-0.020538	-0.017702	0.028487	0.0034729	-0.017375	0.0045797	0.010444	0.049159	-0.038485	-0.010863	-0.010473	-0.010473	0.11872	-0.0034495	-0.021459	0.032454	-0.020071	-0.026674	-0.0045322	0.041106	0.013594	-0.032368	0.0093824	0.013369	-0.027616	-0.0034635	-0.0027817	-0.089867	-0.039311	-0.01937	-0.040079	-0.024876	-0.0025785	-0.024843	-0.011667	0.040488	0.048099	0.01543	0.044875	0.052298	-0.038661	-0.019829	-0.015606
8215	0	0	0	0	0	0	0	0	0	0	0	0	0	0	0	0	0	0	0	0	0	0	0	0	0	0	0	0	0	0	0	0	0	0	0	0	0	0	0	0	0	0	0	0	0	0	0	0	0
8655	-0.019405	-0.010845	0.54792	-0.0096536	-0.017208	-0.035423	-0.014989	0.0094341	0.022485	0.0044099	-0.015684	0.012938	-0.005935	0.047664	-0.040083	-0.014119	-0.017985	-0.017985	0.10119	0.0070698	-0.01649	0.019852	-0.020493	-0.025976	0.00096683	0.041476	0.01408	-0.036427	0.027269	0.012248	-0.017782	0.016801	0.001208	-0.077735	-0.038505	-0.025825	-0.023983	-0.012156	-0.012331	-0.0094222	-0.0043174	0.041588	0.048644	0.0036739	0.036929	0.059356	-0.034133	-0.02353	-0.014077
64100	0	0	0	0	0	0	0	0	0	0	0	0	0	0	0	0	0	0	0	0	0	0	0	0	0	0	0	0	0	0	0	0	0	0	0	0	0	0	0	0	0	0	0	0	0	0	0	0	0
2118	0	0	0	0	0	0	0	0	0	0	0	0	0	0	0	0	0	0	0	0	0	0	0	0	0	0	0	0	0	0	0	0	0	0	0	0	0	0	0	0	0	0	0	0	0	0	0	0	0
1629	0	0	0	0	0	0	0	0	0	0	0	0	0	0	0	0	0	0	0	0	0	0	0	0	0	0	0	0	0	0	0	0	0	0	0	0	0	0	0	0	0	0	0	0	0	0	0	0	0
1869	-0.019985	-0.025015	0.57979	-0.0041582	-0.01865	-0.030791	-0.023368	0.0049433	0.028509	0.0062585	-0.022427	0.0062202	-0.00038132	0.056417	-0.041755	-0.0027687	-0.015945	-0.015945	0.11221	0.0022462	-0.01985	0.018188	-0.031203	-0.017886	-0.004119	0.043692	0.021064	-0.032314	0.020442	0.017085	-0.022195	0.013402	0.0084218	-0.067897	-0.042904	-0.019737	-0.02864	-0.019083	0.0075678	-0.01852	0.0092515	0.047776	0.030314	3.64e-05	0.049031	0.092047	-0.034963	-0.0031414	0.012392
1874	-0.021566	-0.022395	0.58218	-0.0051575	-0.021944	-0.032038	-0.019853	0.003417	0.027298	0.0042083	-0.023298	0.0078457	-0.005299	0.053849	-0.041994	-0.00502	-0.016011	-0.016011	0.11133	-0.0023502	-0.018382	0.015958	-0.028026	-0.021277	-0.0024026	0.043277	0.018393	-0.03329	0.025258	0.01744	-0.022614	0.0096139	0.0052734	-0.07103	-0.043928	-0.024101	-0.030452	-0.019037	0.000504	-0.021419	0.005118	0.043492	0.03424	0.0015045	0.045873	0.07829	-0.035495	-0.0081128	-0.0033533
1738	0	0	0	0	0	0	0	0	0	0	0	0	0	0	0	0	0	0	0	0	0	0	0	0	0	0	0	0	0	0	0	0	0	0	0	0	0	0	0	0	0	0	0	0	0	0	0	0	0
10682	-0.017503	-0.0069746	0.49572	-0.024011	-0.035103	-0.057637	-0.0072437	-0.037331	0.038972	0.0014255	-0.037072	0.0028247	-0.023241	0.02482	-0.056415	-0.011064	-0.011223	-0.011223	0.12769	0.011225	-0.020166	0.029113	-0.013338	-0.028984	0.013402	0.050709	0.02454	-0.048729	-0.012289	0.022856	-0.046707	-0.018289	-0.028227	-0.12135	-0.047056	-0.034875	-0.056351	-0.026391	-0.022027	-0.0093573	-0.030069	0.023232	0.054399	0.044146	0.076737	0.01305	-0.034216	-0.007098	-0.027676
6461	-0.018134	-0.010071	0.54738	-0.0097869	-0.016522	-0.034924	-0.015217	0.010234	0.022656	0.0043488	-0.015173	0.013222	-0.0057483	0.047417	-0.040013	-0.014001	-0.017672	-0.017672	0.10051	0.0071989	-0.016473	0.019732	-0.020961	-0.026375	0.00051608	0.041954	0.013845	-0.036062	0.027183	0.011833	-0.017927	0.016848	0.0012605	-0.077088	-0.038109	-0.026	-0.023053	-0.011381	-0.012373	-0.0095282	-0.0038951	0.042363	0.04858	0.0034768	0.036774	0.060129	-0.03385	-0.02367	-0.013521
22915	0	0	0	0	0	0	0	0	0	0	0	0	0	0	0	0	0	0	0	0	0	0	0	0	0	0	0	0	0	0	0	0	0	0	0	0	0	0	0	0	0	0	0	0	0	0	0	0	0
51295	-0.029885	-0.021891	0.73975	-0.014101	-0.019541	-0.039986	-0.018037	-0.0064266	0.02141	0.011096	-0.020565	-0.0035498	0.0038905	0.053167	-0.032327	-0.0073556	-0.0057296	-0.0057296	0.10402	-0.016629	-0.021305	0.025924	-0.020999	-0.030131	-0.0097962	0.036086	0.0067994	-0.039786	0.0064159	0.018566	-0.028434	0.0045634	0.0014814	-0.073569	-0.049952	-0.026568	-0.04228	-0.029717	-0.00044346	-0.033591	0.0043862	0.036521	0.027881	0.0014498	0.030511	0.068198	-0.036027	-0.017019	-0.011185
1901	0	0	0	0	0	0	0	0	0	0	0	0	0	0	0	0	0	0	0	0	0	0	0	0	0	0	0	0	0	0	0	0	0	0	0	0	0	0	0	0	0	0	0	0	0	0	0	0	0
1909	-0.033778	-0.005731	0.38171	-0.0087222	-0.029704	-0.055408	0.030204	-0.019834	0.12706	0.02286	-0.042126	0.011352	-0.016463	0.044057	-0.014528	-0.036755	-0.008363	-0.008363	0.087795	0.0063981	0.014791	0.043096	0.039773	-0.00097828	0.020281	0.049657	0.023745	-0.035298	-0.020087	0.019439	-0.024773	-0.0022488	-0.032643	-0.090059	-0.029121	0.0032723	-0.061289	-0.04429	-0.0045785	0.0093343	-0.024708	-0.010467	0.074552	0.085502	0.026513	0.013357	-0.0064957	0.0048466	-0.036012
1950	-0.02307	-0.018581	0.58184	-0.0048154	-0.026145	-0.037198	-0.017372	0.00042901	0.028096	0.0048216	-0.024902	0.0048399	-0.010679	0.049809	-0.041145	-0.0052486	-0.015974	-0.015974	0.10284	-0.0048975	-0.02064	0.016927	-0.02589	-0.020697	-0.0045328	0.040573	0.016952	-0.03743	0.022066	0.021491	-0.024895	0.01226	0.0032636	-0.074466	-0.047639	-0.024782	-0.036529	-0.022572	-0.0013814	-0.021694	0.0034479	0.041286	0.030682	2.3e-05	0.048806	0.068523	-0.034379	-0.011976	0.0023623
1956	-0.018249	-0.010065	0.50016	-0.010504	-0.021925	-0.037626	-0.017061	0.0073711	0.029699	0.0088036	-0.022281	0.0098661	-0.011904	0.056083	-0.047373	-0.011028	-0.012826	-0.012826	0.10654	0.02358	-0.013135	0.020714	-0.019346	-0.025614	0.0096451	0.043507	0.019463	-0.03225	0.010044	0.010656	-0.019192	0.013896	0.00016227	-0.077357	-0.038184	-0.030475	-0.023774	-0.01069	0.0020507	0.0027468	-0.0047593	0.043883	0.051785	0.026497	0.063877	0.067501	-0.033193	0.0029114	-0.00083967
1958	-0.020507	-0.026896	0.585	-0.0036877	-0.021931	-0.03121	-0.021346	0.0040609	0.029483	0.005035	-0.023271	0.0091186	-0.0039726	0.05561	-0.042721	-0.0027558	-0.016579	-0.016579	0.11422	-0.0026367	-0.017272	0.014687	-0.029983	-0.018441	-0.0023403	0.045931	0.021352	-0.030333	0.023815	0.018924	-0.023059	0.010214	0.0060476	-0.06602	-0.043061	-0.019873	-0.030063	-0.020263	0.0075292	-0.022027	0.0087456	0.046364	0.03177	0.0020377	0.048531	0.089768	-0.034238	-0.00064619	0.0012061
1959	-0.019808	-0.024471	0.58426	-0.0041801	-0.021788	-0.034532	-0.021047	0.003244	0.029218	0.0045766	-0.023887	0.0079533	-0.0053475	0.054364	-0.042092	-0.0037375	-0.016861	-0.016861	0.111	-0.0033674	-0.018553	0.016559	-0.028313	-0.019091	-0.0029331	0.04529	0.020621	-0.032464	0.023313	0.019101	-0.023034	0.010927	0.0048213	-0.069009	-0.044939	-0.021454	-0.032125	-0.021387	0.0044877	-0.022605	0.006936	0.044545	0.03197	0.0010187	0.048258	0.084989	-0.033933	-0.0053574	0.00071167
1960	-0.014175	-0.037558	0.64543	-0.014303	-0.013891	-0.036859	-0.01958	-0.010003	0.026632	0.0003361	-0.025716	0.013205	0.01508	0.052516	-0.043861	-0.0077072	-0.016281	-0.016281	0.14823	-0.0023205	-0.019195	0.021784	-0.023972	-0.020186	0.0021948	0.059878	0.021909	-0.02691	0.015556	0.0126	-0.029999	-0.0048619	0.00029293	-0.071803	-0.037701	-0.014579	-0.029092	-0.022653	0.0046007	-0.029346	0.0014558	0.035941	0.042506	0.012583	0.042364	0.082853	-0.033599	0.00586	-0.015816
1978	-0.019405	-0.010845	0.54792	-0.0096536	-0.017208	-0.035423	-0.014989	0.0094341	0.022485	0.0044099	-0.015684	0.012938	-0.005935	0.047664	-0.040083	-0.014119	-0.017985	-0.017985	0.10119	0.0070698	-0.01649	0.019852	-0.020493	-0.025976	0.00096683	0.041476	0.01408	-0.036427	0.027269	0.012248	-0.017782	0.016801	0.001208	-0.077735	-0.038505	-0.025825	-0.023983	-0.012156	-0.012331	-0.0094222	-0.0043174	0.041588	0.048644	0.0036739	0.036929	0.059356	-0.034133	-0.02353	-0.014077
1965	-0.023622	-0.018363	0.5866	-0.0063924	-0.026488	-0.0381	-0.018652	-0.0006695	0.029026	0.0043829	-0.025612	0.0038858	-0.01055	0.050958	-0.040954	-0.005684	-0.015438	-0.015438	0.10545	-0.004702	-0.020475	0.017423	-0.026163	-0.021355	-0.0046534	0.040241	0.016564	-0.037895	0.020503	0.020074	-0.024725	0.010406	0.001602	-0.076381	-0.048858	-0.026321	-0.038198	-0.02327	-0.0025558	-0.022658	0.0039108	0.04117	0.031261	0.001713	0.048093	0.066863	-0.03474	-0.011821	-0.001544
1967	-0.023286	-0.02092	0.59123	-0.005391	-0.02655	-0.037444	-0.020187	-0.0027044	0.026375	0.0033139	-0.026912	0.0045224	-0.010451	0.05099	-0.04071	-0.0045329	-0.016853	-0.016853	0.12063	-0.0071383	-0.020985	0.014926	-0.026121	-0.020242	-0.0042272	0.040825	0.017256	-0.037383	0.020206	0.020758	-0.023184	0.0090819	0.00010811	-0.074706	-0.049614	-0.025977	-0.038407	-0.022932	0.0025466	-0.024086	0.002498	0.042115	0.028785	0.0020765	0.068037	0.067099	-0.034506	0.010945	0.0016678
1968	-0.023527	-0.019213	0.58589	-0.0059866	-0.026312	-0.037378	-0.018653	-0.00031651	0.029103	0.0046193	-0.025636	0.0039616	-0.010389	0.051171	-0.040911	-0.0051825	-0.015608	-0.015608	0.1062	-0.0046374	-0.020152	0.016926	-0.026486	-0.020916	-0.0046815	0.040268	0.016921	-0.037194	0.020389	0.020019	-0.024423	0.010722	0.002064	-0.07532	-0.048414	-0.025867	-0.037593	-0.02313	-0.001461	-0.022713	0.004813	0.04182	0.031094	0.0016134	0.048704	0.068623	-0.034585	-0.010096	-0.00082135
8661	-0.023021	-0.020582	0.6126	-0.0084848	-0.027604	-0.042379	-0.017477	-0.0086497	0.028974	0.0043544	-0.027105	0.0021232	-0.0096624	0.048007	-0.042045	-0.0060871	-0.014731	-0.014731	0.11112	-0.0063679	-0.021717	0.019779	-0.02448	-0.021366	-0.0054004	0.041067	0.016172	-0.040895	0.014156	0.021299	-0.029634	0.0075693	-0.0023777	-0.081035	-0.050125	-0.025521	-0.043564	-0.027334	-0.0031261	-0.024718	0.00077388	0.038733	0.031533	0.0045164	0.049274	0.061666	-0.034722	-0.011873	-0.0035483
1973	-0.023803	-0.021273	0.59015	-0.0057801	-0.026474	-0.037571	-0.017841	-0.0012726	0.030641	0.0053369	-0.024306	0.0043646	-0.0088089	0.053865	-0.040668	-0.0043476	-0.015792	-0.015792	0.10707	-0.0061223	-0.01962	0.018075	-0.025991	-0.018776	-0.0046638	0.041753	0.017822	-0.036991	0.017442	0.020995	-0.025506	0.012179	-0.0005921	-0.075467	-0.0472	-0.021623	-0.039152	-0.024575	0.0021574	-0.021606	0.0047894	0.043842	0.030567	0.0028436	0.04879	0.073199	-0.034633	-0.0079846	0.0007243
1975	-0.019405	-0.010845	0.54792	-0.0096536	-0.017208	-0.035423	-0.014989	0.0094341	0.022485	0.0044099	-0.015684	0.012938	-0.005935	0.047664	-0.040083	-0.014119	-0.017985	-0.017985	0.10119	0.0070698	-0.01649	0.019852	-0.020493	-0.025976	0.00096683	0.041476	0.01408	-0.036427	0.027269	0.012248	-0.017782	0.016801	0.001208	-0.077735	-0.038505	-0.025825	-0.023983	-0.012156	-0.012331	-0.0094222	-0.0043174	0.041588	0.048644	0.0036739	0.036929	0.059356	-0.034133	-0.02353	-0.014077
1977	-0.023527	-0.019213	0.58589	-0.0059866	-0.026312	-0.037378	-0.018653	-0.00031651	0.029103	0.0046193	-0.025636	0.0039616	-0.010389	0.051171	-0.040911	-0.0051825	-0.015608	-0.015608	0.1062	-0.0046374	-0.020152	0.016926	-0.026486	-0.020915	-0.0046815	0.040268	0.016921	-0.037194	0.020389	0.020019	-0.024423	0.010722	0.002064	-0.07532	-0.048414	-0.025867	-0.037593	-0.02313	-0.001461	-0.022713	0.004813	0.04182	0.031094	0.0016134	0.048704	0.068623	-0.034585	-0.010096	-0.00082135
1981	-0.023527	-0.019213	0.58589	-0.0059866	-0.026312	-0.037378	-0.018653	-0.00031651	0.029103	0.0046193	-0.025636	0.0039616	-0.010389	0.051171	-0.040911	-0.0051825	-0.015608	-0.015608	0.1062	-0.0046374	-0.020152	0.016926	-0.026486	-0.020916	-0.0046815	0.040268	0.016921	-0.037194	0.020389	0.020019	-0.024423	0.010722	0.002064	-0.07532	-0.048414	-0.025867	-0.037593	-0.02313	-0.001461	-0.022713	0.004813	0.04182	0.031094	0.0016134	0.048704	0.068623	-0.034585	-0.010096	-0.00082135
1983	-0.030323	-0.023129	0.63322	-0.013329	-0.025885	-0.040899	-0.012603	-0.01138	0.034653	0.0058858	-0.025856	0.0046974	-0.0038456	0.058906	-0.038609	-0.011216	-0.014417	-0.014417	0.11996	-0.0088332	-0.016427	0.024657	-0.021227	-0.020383	-0.0031024	0.043294	0.014009	-0.039195	0.0062211	0.018191	-0.027279	0.0068623	-0.0076662	-0.084115	-0.044852	-0.018872	-0.04378	-0.028495	-0.0008882	-0.022224	9.62e-05	0.039162	0.039565	0.011264	0.03771	0.06574	-0.036919	-0.011106	-0.012545
2002	-0.021871	-0.021753	0.592	-0.0052035	-0.024915	-0.036806	-0.020072	-0.00050298	0.028099	0.0033511	-0.026101	0.0044866	-0.0059251	0.05232	-0.041938	-0.0041706	-0.015792	-0.015792	0.11141	-0.0054428	-0.021185	0.016372	-0.027804	-0.021036	-0.0038463	0.042325	0.01768	-0.035519	0.022323	0.019387	-0.025945	0.007965	0.0043554	-0.07338	-0.048259	-0.025212	-0.036357	-0.022846	-0.000549	-0.025255	0.0047592	0.041253	0.029514	6.19e-05	0.047743	0.07365	-0.034959	-0.0089383	-0.0012951
10411	0	0	0	0	0	0	0	0	0	0	0	0	0	0	0	0	0	0	0	0	0	0	0	0	0	0	0	0	0	0	0	0	0	0	0	0	0	0	0	0	0	0	0	0	0	0	0	0	0
2056	-0.023908	-0.017393	0.58684	-0.0066498	-0.026618	-0.038345	-0.018463	-0.0010939	0.02833	0.0037596	-0.02593	0.0033649	-0.010731	0.05038	-0.04083	-0.0061732	-0.015337	-0.015337	0.10492	-0.0048007	-0.021192	0.017451	-0.026161	-0.022254	-0.0045683	0.039713	0.015726	-0.038624	0.022054	0.01973	-0.024832	0.0097463	0.0023313	-0.077317	-0.049649	-0.028073	-0.038387	-0.02315	-0.0050213	-0.022981	0.0029746	0.040326	0.030861	0.00080222	0.046902	0.064434	-0.035091	-0.01435	-0.0024374
2057	-0.019903	-0.011345	0.52568	-0.0091198	-0.024959	-0.039862	-0.014132	0.002675	0.033213	0.0057648	-0.023576	0.008393	-0.014317	0.051675	-0.046433	-0.008659	-0.012046	-0.012046	0.1018	0.0077654	-0.015318	0.019405	-0.019876	-0.027473	0.0053201	0.044477	0.018596	-0.032915	0.014729	0.016142	-0.02329	0.0058819	0.0004547	-0.079914	-0.043999	-0.032966	-0.031783	-0.016951	-0.0055569	-0.01004	-0.0047058	0.039649	0.045673	0.017948	0.056141	0.060624	-0.034112	-0.0068533	-0.013367
2069	-0.023552	-0.01707	0.58169	-0.0054779	-0.026245	-0.037436	-0.017918	0.00027919	0.027488	0.0041381	-0.025655	0.0038142	-0.011095	0.049718	-0.040597	-0.0059992	-0.016037	-0.016037	0.10335	-0.0043983	-0.021062	0.016754	-0.026194	-0.022211	-0.0043555	0.039275	0.015793	-0.038186	0.024085	0.019679	-0.024129	0.010967	0.0043943	-0.076029	-0.048994	-0.028316	-0.036501	-0.022126	-0.0050085	-0.022359	0.0027874	0.04019	0.030981	-0.0004621	0.046663	0.065112	-0.035023	-0.014323	-0.0011764
2099	-0.01584	-0.019053	0.53301	-0.007928	-0.023758	-0.038378	-0.018053	0.00482	0.032167	0.0044648	-0.023913	0.013756	-0.0086168	0.054983	-0.046953	-0.0060838	-0.015638	-0.015638	0.11216	0.009193	-0.014647	0.016359	-0.021622	-0.021489	0.0065188	0.051291	0.023549	-0.026916	0.017135	0.016533	-0.02315	0.0086974	0.0014268	-0.070398	-0.040605	-0.025601	-0.026358	-0.016408	0.0058453	-0.011114	-0.0003239	0.04336	0.044137	0.019662	0.063508	0.076589	-0.030934	0.0080374	-0.0072126
2064	-0.019927	-0.0076809	0.49909	-0.010609	-0.020922	-0.037644	-0.014858	0.0089552	0.029147	0.0087695	-0.021552	0.0092739	-0.012881	0.055156	-0.046209	-0.0127	-0.013581	-0.013581	0.10024	0.021988	-0.012532	0.021033	-0.018633	-0.027392	0.010046	0.042567	0.018543	-0.033138	0.012727	0.010214	-0.017899	0.013595	0.0011381	-0.078481	-0.037931	-0.033186	-0.023418	-0.010469	-0.0026162	0.001939	-0.0065465	0.042032	0.053746	0.023895	0.056193	0.064172	-0.033068	-0.0058611	-0.0042398
6294	-0.023184	-0.020127	0.58441	-0.0050328	-0.025647	-0.03553	-0.019129	0.00077558	0.028473	0.0042659	-0.025166	0.0047413	-0.0095693	0.051926	-0.041506	-0.005067	-0.015522	-0.015522	0.10647	-0.0030176	-0.019726	0.016224	-0.02774	-0.021153	-0.0040453	0.040535	0.017213	-0.036203	0.023163	0.019682	-0.024153	0.010526	0.0044453	-0.07361	-0.047671	-0.026155	-0.035878	-0.022087	-0.0010065	-0.021954	0.0049883	0.042701	0.030888	0.00086731	0.047488	0.071501	-0.035031	-0.010077	-0.0010484
5595	-0.021927	-0.016338	0.56829	-0.0053245	-0.023625	-0.039048	-0.020546	0.0025993	0.028175	0.0062215	-0.024415	0.0023895	-0.0058081	0.050022	-0.041316	-0.0051352	-0.015566	-0.015566	0.10378	0.0042086	-0.023033	0.020556	-0.028111	-0.01826	-0.0042803	0.039836	0.017405	-0.038957	0.019982	0.018505	-0.024295	0.016995	0.002414	-0.076859	-0.049581	-0.026189	-0.035468	-0.021518	-0.0022283	-0.014864	0.0047091	0.042994	0.028858	-0.00050012	0.047947	0.072774	-0.035213	-0.011409	0.008734
5594	-0.022341	-0.014766	0.5722	-0.0059662	-0.021985	-0.038561	-0.02191	0.0035847	0.025994	0.0079047	-0.024876	-4.73e-05	-0.0053656	0.05152	-0.041715	-0.006733	-0.016528	-0.016528	0.10532	0.0062351	-0.023736	0.020286	-0.030437	-0.018611	-0.0051594	0.037129	0.016368	-0.042417	0.014499	0.016445	-0.02291	0.018322	0.0059892	-0.076251	-0.048174	-0.025677	-0.033072	-0.020569	-0.0014486	-0.014816	0.0068198	0.04378	0.029306	-0.0024665	0.046275	0.076121	-0.035195	-0.013165	0.015254
5598	-0.019405	-0.010845	0.54792	-0.0096536	-0.017208	-0.035423	-0.014989	0.0094341	0.022485	0.0044099	-0.015684	0.012938	-0.005935	0.047664	-0.040083	-0.014119	-0.017985	-0.017985	0.10119	0.0070698	-0.01649	0.019852	-0.020493	-0.025976	0.00096683	0.041476	0.01408	-0.036427	0.027269	0.012248	-0.017782	0.016801	0.001208	-0.077735	-0.038505	-0.025825	-0.023983	-0.012156	-0.012331	-0.0094222	-0.0043174	0.041588	0.048644	0.0036739	0.036929	0.059356	-0.034133	-0.02353	-0.014077
2113	-0.021499	-0.02378	0.5856	-0.0046465	-0.022132	-0.032082	-0.020294	0.0029356	0.028144	0.0042255	-0.023738	0.0076413	-0.0048617	0.054453	-0.042118	-0.0041875	-0.01572	-0.01572	0.11273	-0.0028909	-0.018395	0.015808	-0.028691	-0.020771	-0.0026375	0.043506	0.018834	-0.032836	0.024808	0.017895	-0.023202	0.0090179	0.0056746	-0.070088	-0.044331	-0.023407	-0.031108	-0.019669	0.0020065	-0.022349	0.0062757	0.044175	0.032987	0.0013281	0.046752	0.080525	-0.035627	-0.0062179	-0.0023074
2114	-0.021199	-0.025212	0.58955	-0.0045591	-0.022687	-0.032103	-0.02066	0.0019899	0.028814	0.0039274	-0.024333	0.00699	-0.0041641	0.054887	-0.04262	-0.0034206	-0.015616	-0.015616	0.11429	-0.0036844	-0.018799	0.015504	-0.029435	-0.020265	-0.0030539	0.043977	0.019292	-0.032363	0.023625	0.018642	-0.02414	0.0081398	0.0059736	-0.069124	-0.044934	-0.022621	-0.032113	-0.020607	0.0034864	-0.023522	0.0074874	0.044851	0.031362	0.0013574	0.047853	0.083033	-0.035253	-0.0039488	-0.001119
2159	-0.025928	-0.020723	0.59221	-0.0031094	-0.027273	-0.03871	-0.015681	-0.004613	0.030811	0.0034941	-0.026016	0.0087283	-0.010693	0.053517	-0.040338	-0.005994	-0.01511	-0.01511	0.10626	-0.0070822	-0.020642	0.018053	-0.024307	-0.017734	-0.0053373	0.041428	0.015096	-0.037046	0.018032	0.023641	-0.027026	0.016338	-0.0016265	-0.077073	-0.046289	-0.017409	-0.040445	-0.024382	-0.0004108	-0.021768	0.0028844	0.04086	0.030164	0.0013381	0.045727	0.066324	-0.035657	-0.012094	-0.00045153
2160	-0.025888	-0.019855	0.59075	-0.0017666	-0.028413	-0.039043	-0.015546	-0.0042388	0.030139	0.0038423	-0.025931	0.0088703	-0.012054	0.053467	-0.041207	-0.0064866	-0.015608	-0.015608	0.1039	-0.0071043	-0.021664	0.016779	-0.024763	-0.019716	-0.005342	0.041169	0.014409	-0.03894	0.019127	0.02413	-0.027263	0.017477	-0.00065948	-0.076984	-0.046822	-0.018418	-0.039787	-0.024022	-0.0018178	-0.021335	0.0025377	0.040228	0.030835	0.00055602	0.045593	0.066079	-0.035641	-0.013358	-0.0008297
2165	0	0	0	0	0	0	0	0	0	0	0	0	0	0	0	0	0	0	0	0	0	0	0	0	0	0	0	0	0	0	0	0	0	0	0	0	0	0	0	0	0	0	0	0	0	0	0	0	0
2147	-0.021084	-0.012976	0.52892	-0.006174	-0.026052	-0.03896	-0.0094235	0.00056374	0.034024	0.0055962	-0.024186	0.012826	-0.014378	0.053951	-0.045965	-0.0094267	-0.013404	-0.013404	0.1023	0.0058578	-0.014985	0.019551	-0.017276	-0.025196	0.005423	0.045146	0.018151	-0.032581	0.014353	0.019939	-0.024306	0.011697	-0.002863	-0.079114	-0.041001	-0.026035	-0.031634	-0.016503	-0.0028464	-0.0086515	-0.0049922	0.039294	0.046957	0.019373	0.056663	0.061632	-0.034152	-0.0054869	-0.010681
2152	-0.024163	-0.018137	0.58539	-0.0066282	-0.025233	-0.037886	-0.018397	-0.00090458	0.028476	0.0039571	-0.025411	0.0045737	-0.0095541	0.050341	-0.040272	-0.0064261	-0.015641	-0.015641	0.10705	-0.0041978	-0.019837	0.018335	-0.025654	-0.020357	-0.0040293	0.040174	0.016217	-0.037054	0.021106	0.019132	-0.024054	0.010319	0.00086684	-0.077365	-0.047948	-0.02625	-0.037914	-0.022705	-0.0038388	-0.022418	0.0026103	0.040722	0.031918	0.0015892	0.046153	0.065847	-0.035184	-0.013619	-0.0023946
2155	-0.028912	-0.019731	0.61421	-0.0016993	-0.028439	-0.04137	-0.013624	-0.0076723	0.0344	0.0057212	-0.02651	0.0076218	-0.010518	0.057438	-0.038908	-0.0097094	-0.014957	-0.014957	0.10351	-0.009497	-0.02126	0.019892	-0.02146	-0.020288	-0.0065106	0.040485	0.01196	-0.040458	0.015209	0.023425	-0.028277	0.018576	-0.0027193	-0.078705	-0.047439	-0.013652	-0.043431	-0.027292	-0.0026042	-0.022218	0.0017305	0.035786	0.032717	0.0025602	0.03803	0.064923	-0.035259	-0.016494	-0.0045817
2158	0	0	0	0	0	0	0	0	0	0	0	0	0	0	0	0	0	0	0	0	0	0	0	0	0	0	0	0	0	0	0	0	0	0	0	0	0	0	0	0	0	0	0	0	0	0	0	0	0
8772	-0.023287	-0.016746	0.57667	-0.0056137	-0.025037	-0.037293	-0.017786	0.0017758	0.026514	0.0043355	-0.024813	0.0048684	-0.010943	0.04895	-0.041033	-0.0072355	-0.016834	-0.016834	0.10162	-0.0032195	-0.019995	0.016265	-0.026159	-0.021831	-0.0043656	0.039699	0.015808	-0.037955	0.023555	0.019123	-0.023469	0.011969	0.004565	-0.07552	-0.047666	-0.027589	-0.035019	-0.021414	-0.0046511	-0.020826	0.0020109	0.039925	0.032568	-0.00026542	0.04586	0.067318	-0.034914	-0.014782	-0.0026289
5747	-0.022221	-0.013633	0.56707	-0.0064457	-0.022241	-0.038046	-0.021888	0.0044199	0.025216	0.0084819	-0.023755	0.0015561	-0.0058301	0.05024	-0.041235	-0.0076509	-0.016821	-0.016821	0.10366	0.0063804	-0.022423	0.019739	-0.030586	-0.020242	-0.0048352	0.037854	0.016205	-0.042458	0.015151	0.016043	-0.022055	0.018962	0.0052002	-0.076595	-0.046677	-0.025714	-0.032142	-0.01957	-0.00069282	-0.012313	0.005515	0.044202	0.031924	-0.0013222	0.045879	0.075127	-0.035072	-0.013673	0.015186
8439	-0.020287	-0.014302	0.55357	-0.008125	-0.027017	-0.040317	-0.015766	-0.0022797	0.033075	0.0046591	-0.025983	0.0052989	-0.012621	0.049577	-0.045925	-0.0064476	-0.01305	-0.01305	0.10547	0.002242	-0.019325	0.019308	-0.022886	-0.024814	0.00047186	0.043881	0.018573	-0.035948	0.01542	0.019202	-0.027184	0.0050474	-0.00060888	-0.08102	-0.048321	-0.031445	-0.037422	-0.021036	-0.005575	-0.015711	-0.001938	0.040451	0.038121	0.011849	0.056665	0.062119	-0.035227	-0.007831	-0.0076134
2175	-0.019405	-0.010845	0.54792	-0.0096536	-0.017208	-0.035423	-0.014989	0.0094341	0.022485	0.0044099	-0.015684	0.012938	-0.005935	0.047664	-0.040083	-0.014119	-0.017985	-0.017985	0.10119	0.0070698	-0.01649	0.019852	-0.020493	-0.025976	0.00096683	0.041476	0.01408	-0.036427	0.027269	0.012248	-0.017782	0.016801	0.001208	-0.077735	-0.038505	-0.025825	-0.023983	-0.012156	-0.012331	-0.0094222	-0.0043174	0.041588	0.048644	0.0036739	0.036929	0.059356	-0.034133	-0.02353	-0.014077
2176	-0.019405	-0.010845	0.54792	-0.0096536	-0.017208	-0.035423	-0.014989	0.0094341	0.022485	0.0044099	-0.015684	0.012938	-0.005935	0.047664	-0.040083	-0.014119	-0.017985	-0.017985	0.10119	0.0070698	-0.01649	0.019852	-0.020493	-0.025976	0.00096683	0.041476	0.01408	-0.036427	0.027269	0.012248	-0.017782	0.016801	0.001208	-0.077735	-0.038505	-0.025825	-0.023983	-0.012156	-0.012331	-0.0094222	-0.0043174	0.041588	0.048644	0.0036739	0.036929	0.059356	-0.034133	-0.02353	-0.014077
2177	-0.019405	-0.010845	0.54792	-0.0096536	-0.017208	-0.035423	-0.014989	0.0094341	0.022485	0.0044099	-0.015684	0.012938	-0.005935	0.047664	-0.040083	-0.014119	-0.017985	-0.017985	0.10119	0.0070698	-0.01649	0.019852	-0.020493	-0.025976	0.00096683	0.041476	0.01408	-0.036427	0.027269	0.012248	-0.017782	0.016801	0.001208	-0.077735	-0.038505	-0.025825	-0.023983	-0.012156	-0.012331	-0.0094222	-0.0043174	0.041588	0.048644	0.0036739	0.036929	0.059356	-0.034133	-0.02353	-0.014077
2178	-0.025753	-0.018647	0.63845	-0.012626	-0.02873	-0.046964	-0.016133	-0.017164	0.028288	0.0045702	-0.029842	-0.00029013	-0.0087914	0.044416	-0.041912	-0.0084027	-0.013781	-0.013781	0.11667	-0.0089785	-0.024398	0.023157	-0.022773	-0.0241	-0.0050435	0.040966	0.014674	-0.045513	0.010036	0.021683	-0.033281	0.0037056	-0.0069361	-0.089411	-0.053316	-0.027759	-0.048664	-0.030133	-0.0084932	-0.026649	-0.0041656	0.034019	0.032081	0.0068546	0.047847	0.052202	-0.036056	-0.015861	-0.0085344
2188	-0.025753	-0.018647	0.63845	-0.012626	-0.02873	-0.046964	-0.016133	-0.017164	0.028288	0.0045702	-0.029842	-0.00029013	-0.0087914	0.044416	-0.041912	-0.0084027	-0.013781	-0.013781	0.11667	-0.0089785	-0.024398	0.023157	-0.022773	-0.0241	-0.0050435	0.040966	0.014674	-0.045513	0.010036	0.021683	-0.033281	0.0037056	-0.0069361	-0.089411	-0.053316	-0.027759	-0.048664	-0.030133	-0.0084932	-0.026649	-0.0041656	0.034019	0.032081	0.0068546	0.047847	0.052202	-0.036056	-0.015861	-0.0085344
2189	-0.023108	-0.020579	0.58451	-0.0051741	-0.025203	-0.034799	-0.019111	0.0009626	0.028507	0.004152	-0.024944	0.0050616	-0.00912	0.052149	-0.041575	-0.0049409	-0.01553	-0.01553	0.10746	-0.0038292	-0.019571	0.016098	-0.028091	-0.021283	-0.0038496	0.040902	0.017384	-0.035756	0.023699	0.019373	-0.023788	0.010071	0.0047761	-0.073108	-0.047286	-0.026249	-0.035042	-0.021672	-0.0010395	-0.022041	0.0052851	0.043207	0.031321	0.00087734	0.047243	0.072793	-0.035191	-0.0096582	-0.0013537
2191	-0.031908	-0.023073	0.63066	-0.00083447	-0.028272	-0.043376	-0.012878	-0.010623	0.034862	0.0087342	-0.02625	0.0094	-0.0095354	0.057564	-0.038433	-0.011346	-0.015545	-0.015545	0.10326	-0.012269	-0.020344	0.020846	-0.02004	-0.01867	-0.0071189	0.040961	0.011282	-0.041699	0.0080926	0.023896	-0.030325	0.020653	-0.0061077	-0.079194	-0.044911	-0.0071596	-0.046444	-0.030011	0.0038134	-0.021569	9.95e-05	0.034384	0.033399	0.004145	0.035116	0.069062	-0.03419	-0.016167	-0.0043974
355	-0.021688	-0.014556	0.5711	-0.011359	-0.02727	-0.042453	-0.015049	-0.0060771	0.031285	0.0058795	-0.026559	0.0055306	-0.011488	0.047769	-0.045762	-0.0094135	-0.01366	-0.01366	0.10931	0.0026434	-0.019001	0.021067	-0.021118	-0.024737	0.0016901	0.044219	0.01803	-0.039019	0.012257	0.018566	-0.028248	0.006151	-0.0037764	-0.085329	-0.047278	-0.030015	-0.03912	-0.022569	-0.0059158	-0.015278	-0.0058191	0.038164	0.04184	0.015516	0.054711	0.058229	-0.034886	-0.0091187	-0.011285
356	-0.023637	-0.016394	0.58102	-0.0059423	-0.025766	-0.037252	-0.016869	0.00032603	0.026861	0.0038331	-0.02557	0.0037175	-0.011108	0.049299	-0.040468	-0.006757	-0.015912	-0.015912	0.10315	-0.0042437	-0.021348	0.016797	-0.025948	-0.023154	-0.0044146	0.038528	0.014958	-0.038393	0.024701	0.019355	-0.023665	0.010523	0.004247	-0.076302	-0.049049	-0.0296	-0.035896	-0.02133	-0.0068142	-0.022426	0.0023278	0.039587	0.031685	-0.00056642	0.046068	0.063606	-0.035211	-0.015692	-0.0023862
51341	-0.024366	-0.023857	0.59214	-0.0067972	-0.023807	-0.032633	-0.019965	0.00052815	0.028726	0.0050567	-0.024649	0.0071009	-0.0058865	0.053118	-0.041946	-0.006063	-0.015986	-0.015986	0.11617	-0.0016358	-0.016649	0.015978	-0.030082	-0.021037	-0.0016909	0.043246	0.018374	-0.033779	0.021869	0.016983	-0.022717	0.0084078	0.0041734	-0.072305	-0.044064	-0.025438	-0.032314	-0.020738	0.0012522	-0.021755	0.0059728	0.045116	0.035265	0.0041126	0.044562	0.078364	-0.036226	-0.0060222	-0.004596
55294	-0.019405	-0.010845	0.54792	-0.0096536	-0.017208	-0.035423	-0.014989	0.0094341	0.022485	0.0044099	-0.015684	0.012938	-0.005935	0.047664	-0.040083	-0.014119	-0.017985	-0.017985	0.10119	0.0070698	-0.01649	0.019852	-0.020493	-0.025976	0.00096683	0.041476	0.01408	-0.036427	0.027269	0.012248	-0.017782	0.016801	0.001208	-0.077735	-0.038505	-0.025825	-0.023983	-0.012156	-0.012331	-0.0094222	-0.0043174	0.041588	0.048644	0.0036739	0.036929	0.059356	-0.034133	-0.02353	-0.014077
26270	-0.023967	-0.015929	0.58206	-0.0064874	-0.026162	-0.037599	-0.018026	-0.00026616	0.027084	0.0037621	-0.025732	0.0037705	-0.011038	0.049053	-0.040337	-0.0066913	-0.015704	-0.015704	0.1036	-0.00404	-0.021298	0.016942	-0.026095	-0.022934	-0.0041347	0.03917	0.015091	-0.039032	0.024821	0.018959	-0.024162	0.011373	0.0029415	-0.077758	-0.049327	-0.028807	-0.036805	-0.021971	-0.0071997	-0.022027	0.0015868	0.039432	0.031762	-0.00023986	0.045407	0.062251	-0.035524	-0.016688	-0.0038737
2243	-0.023908	-0.017393	0.58684	-0.0066498	-0.026618	-0.038345	-0.018463	-0.0010939	0.02833	0.0037596	-0.02593	0.0033649	-0.010731	0.05038	-0.04083	-0.0061732	-0.015337	-0.015337	0.10492	-0.0048007	-0.021192	0.017451	-0.026161	-0.022254	-0.0045683	0.039713	0.015726	-0.038624	0.022054	0.01973	-0.024832	0.0097463	0.0023313	-0.077317	-0.049649	-0.028073	-0.038387	-0.02315	-0.0050213	-0.022981	0.0029746	0.040326	0.030861	0.00080222	0.046902	0.064434	-0.035091	-0.01435	-0.0024374
2309	-0.020815	-0.026449	0.58405	-0.00401	-0.021851	-0.030658	-0.021162	0.0041942	0.029521	0.0059635	-0.022452	0.0097587	-0.0029522	0.055992	-0.042169	-0.0027955	-0.015705	-0.015705	0.11424	-0.0015253	-0.01627	0.015215	-0.029563	-0.018745	-0.0016766	0.045108	0.021144	-0.030841	0.02332	0.018645	-0.022917	0.010965	0.0045568	-0.067315	-0.042478	-0.019147	-0.030223	-0.019802	0.008349	-0.020188	0.0081938	0.047222	0.032861	0.003396	0.048495	0.086605	-0.034815	-0.00070938	9.62e-06
2322	-0.014844	-0.0021058	0.43159	-0.010606	-0.017975	-0.043821	-0.011047	0.0089123	0.035181	0.010371	-0.018912	0.0080227	-0.015163	0.05104	-0.054756	-0.014045	-0.009128	-0.009128	0.096131	0.031351	-0.011877	0.023574	-0.019401	-0.033016	0.014191	0.044748	0.017484	-0.03126	-0.0057405	0.0073212	-0.021109	0.0042506	-0.0008857	-0.084074	-0.037298	-0.037592	-0.021792	-0.0075376	-0.0073175	0.011926	-0.010627	0.041962	0.062118	0.034638	0.064214	0.058348	-0.032899	-0.0002433	-0.013586
6711	-0.019405	-0.010845	0.54792	-0.0096536	-0.017208	-0.035423	-0.014989	0.0094341	0.022485	0.0044099	-0.015684	0.012938	-0.005935	0.047664	-0.040083	-0.014119	-0.017985	-0.017985	0.10119	0.0070698	-0.01649	0.019852	-0.020493	-0.025976	0.00096683	0.041476	0.01408	-0.036427	0.027269	0.012248	-0.017782	0.016801	0.001208	-0.077735	-0.038505	-0.025825	-0.023983	-0.012156	-0.012331	-0.0094222	-0.0043174	0.041588	0.048644	0.0036739	0.036929	0.059356	-0.034133	-0.02353	-0.014077
2353	-0.020469	-0.024056	0.58558	-0.0035937	-0.022763	-0.034386	-0.020916	0.0028722	0.028718	0.0038941	-0.024524	0.007453	-0.0051988	0.054038	-0.042102	-0.0033747	-0.016946	-0.016946	0.111	-0.0039698	-0.019285	0.015277	-0.028597	-0.019359	-0.003367	0.045129	0.02003	-0.0321	0.023838	0.019228	-0.024145	0.0097911	0.0061893	-0.068469	-0.045049	-0.021919	-0.032118	-0.021165	0.0037582	-0.023624	0.0065497	0.043272	0.030878	0.0004093	0.048266	0.085705	-0.034121	-0.0050456	0.00057509
2354	-0.022823	-0.022765	0.58361	-0.0048546	-0.022894	-0.031419	-0.019912	0.0029986	0.028049	0.004065	-0.024071	0.0062628	-0.0075637	0.054112	-0.041664	-0.0044155	-0.014984	-0.014984	0.11051	-0.002505	-0.018408	0.015202	-0.029796	-0.021974	-0.0033501	0.041336	0.01754	-0.033408	0.025938	0.01757	-0.022039	0.0091906	0.0070888	-0.070502	-0.045175	-0.026941	-0.031304	-0.019556	-0.00024447	-0.021914	0.0070527	0.04491	0.032661	0.00039385	0.046205	0.07812	-0.036379	-0.0081441	-0.0026746
10023	0	0	0	0	0	0	0	0	0	0	0	0	0	0	0	0	0	0	0	0	0	0	0	0	0	0	0	0	0	0	0	0	0	0	0	0	0	0	0	0	0	0	0	0	0	0	0	0	0
8321	-0.020263	-0.01005	0.51747	-0.0096283	-0.02395	-0.038278	-0.012191	0.0050889	0.031039	0.0061508	-0.022503	0.010016	-0.014019	0.053149	-0.045807	-0.010265	-0.012954	-0.012954	0.10124	0.0090039	-0.013558	0.019147	-0.017634	-0.028401	0.0079601	0.043262	0.018273	-0.031587	0.017076	0.014183	-0.020497	0.007876	-0.00016197	-0.078916	-0.041077	-0.033697	-0.028372	-0.013881	-0.0055917	-0.0076178	-0.0059976	0.038908	0.049694	0.020708	0.056116	0.059043	-0.033349	-0.0074078	-0.01525
2488	-0.023784	-0.01677	0.57449	-0.0049144	-0.024836	-0.036766	-0.017085	0.0022471	0.026113	0.0049398	-0.023732	0.005368	-0.010507	0.049657	-0.040273	-0.0071866	-0.016377	-0.016377	0.10159	-0.0029566	-0.019944	0.016734	-0.025235	-0.021227	-0.0034753	0.039458	0.015952	-0.037597	0.024173	0.018789	-0.022858	0.012329	0.0027423	-0.075413	-0.047054	-0.027823	-0.034805	-0.020563	-0.0046307	-0.020175	0.0015764	0.040899	0.0339	0.00046447	0.046305	0.065278	-0.034406	-0.015073	-0.0037728
2492	-0.019405	-0.010845	0.54792	-0.0096536	-0.017208	-0.035423	-0.014989	0.0094341	0.022485	0.0044099	-0.015684	0.012938	-0.005935	0.047664	-0.040083	-0.014119	-0.017985	-0.017985	0.10119	0.0070698	-0.01649	0.019852	-0.020493	-0.025976	0.00096683	0.041476	0.01408	-0.036427	0.027269	0.012248	-0.017782	0.016801	0.001208	-0.077735	-0.038505	-0.025825	-0.023983	-0.012156	-0.012331	-0.0094222	-0.0043174	0.041588	0.048644	0.0036739	0.036929	0.059356	-0.034133	-0.02353	-0.014077
9971	-0.018301	-0.023821	0.55568	-0.0062718	-0.02154	-0.031575	-0.018996	0.0030283	0.034411	0.0071563	-0.023161	0.011168	-0.0049752	0.058947	-0.044341	-0.0017746	-0.012622	-0.012622	0.11197	0.0039127	-0.012588	0.018072	-0.022795	-0.020417	0.0039805	0.046726	0.024349	-0.024719	0.01744	0.018315	-0.022967	0.0068484	0.0020927	-0.068099	-0.039476	-0.020699	-0.029107	-0.017822	0.012321	-0.015702	0.0037225	0.046607	0.03911	0.017286	0.060069	0.082767	-0.033676	0.0061903	-0.0023958
2534	-0.021376	-0.011964	0.57163	-0.0059062	-0.020927	-0.038067	-0.021292	0.0046758	0.025426	0.0075327	-0.024255	0.00050305	-0.0072094	0.04992	-0.041869	-0.0075143	-0.016569	-0.016569	0.103	0.0075476	-0.023425	0.020578	-0.030186	-0.021405	-0.0056933	0.037024	0.014724	-0.043059	0.01603	0.015973	-0.023209	0.018456	0.005568	-0.077169	-0.04717	-0.025706	-0.031537	-0.018683	-0.0037787	-0.012624	0.005008	0.042934	0.032457	-0.0020718	0.046256	0.073575	-0.036267	-0.0146	0.016424
5544	-0.023174	-0.013477	0.59403	-0.017067	-0.019806	-0.040484	-0.01456	-0.00055834	0.026957	0.0028796	-0.018311	0.0093293	-0.0036834	0.049453	-0.041299	-0.016349	-0.01453	-0.01453	0.11136	0.0030357	-0.016267	0.025613	-0.018428	-0.027273	-0.0010338	0.042287	0.012341	-0.039459	0.015241	0.013067	-0.021	0.0077401	-0.0066546	-0.086512	-0.041183	-0.025328	-0.034059	-0.018609	-0.012858	-0.014584	-0.0041623	0.03879	0.048886	0.012903	0.039686	0.051185	-0.036086	-0.020282	-0.01952
5545	-0.025567	-0.016328	0.65734	-0.022707	-0.026063	-0.051904	-0.013442	-0.02629	0.027716	0.0025118	-0.027353	-0.00075673	-0.0028543	0.03963	-0.04287	-0.015082	-0.012088	-0.012088	0.12396	-0.0066028	-0.024671	0.030699	-0.017798	-0.026484	-0.003944	0.04268	0.011482	-0.050768	-7.78e-05	0.018701	-0.036805	-0.0015238	-0.018397	-0.10131	-0.050513	-0.026384	-0.053203	-0.03121	-0.016516	-0.02331	-0.013954	0.03127	0.04343	0.016067	0.04484	0.037476	-0.03745	-0.022059	-0.021012
2597	-0.026524	-0.022446	0.68017	-0.011678	-0.023097	-0.040315	-0.020587	-0.0049374	0.023437	0.0087259	-0.023481	-0.0017473	-0.0026119	0.053228	-0.038337	-0.0074849	-0.010356	-0.010356	0.10687	-0.011177	-0.021706	0.022358	-0.026165	-0.025959	-0.0083434	0.038003	0.011122	-0.039951	0.0075611	0.019301	-0.025933	0.0078245	0.002817	-0.07443	-0.049374	-0.025828	-0.041647	-0.0283	0.0032704	-0.028952	0.0076434	0.040578	0.027607	-0.0001299	0.037797	0.072716	-0.035718	-0.015955	-0.0040289
175	-0.036702	-0.020921	0.71636	-0.020634	-0.024541	-0.061501	-0.012757	-0.030655	0.032099	0.0083096	-0.021353	0.00069475	-0.00065664	0.060726	-0.036821	-0.024022	-0.0094971	-0.0094971	0.1191	-0.015887	-0.022044	0.03575	-0.01079	-0.031221	-0.0077085	0.037935	-0.00037487	-0.051346	-0.012085	0.016084	-0.03545	0.0033241	-0.021158	-0.097575	-0.048101	-0.015942	-0.056577	-0.036946	-0.011852	-0.027097	-0.0090057	0.018007	0.053055	0.014433	0.012171	0.036259	-0.038666	-0.032456	-0.029663
2548	-0.034303	-0.0090419	0.71341	-0.021715	-0.025812	-0.059824	-0.0096165	-0.032227	0.032186	0.0078089	-0.023858	0.00029844	-0.0022672	0.16054	-0.037675	-0.023778	-0.012604	-0.012604	0.11977	-0.013122	-0.026191	0.03517	-0.012039	-0.033844	-0.0072265	0.030167	-0.0039687	-0.05213	-0.011821	0.012102	-0.03755	-0.0014258	-0.012435	-0.094326	-0.043283	-0.015135	-0.056513	-0.029888	-0.0084121	-0.028309	-0.0091001	0.030962	0.045569	0.013172	0.014872	0.042056	-0.037558	-0.034335	-0.034296
2549	-0.023581	-0.017067	0.58188	-0.0055813	-0.026404	-0.037647	-0.018361	0.000112	0.027576	0.0041508	-0.025701	0.0039488	-0.01112	0.049759	-0.04054	-0.0058861	-0.015888	-0.015888	0.10354	-0.004447	-0.020842	0.016709	-0.026286	-0.021848	-0.0042815	0.039701	0.016063	-0.038242	0.02376	0.019671	-0.024393	0.010973	0.0033296	-0.076314	-0.049005	-0.028039	-0.037008	-0.022395	-0.0045494	-0.022277	0.0026879	0.040347	0.030981	-7.15e-05	0.04646	0.065173	-0.034965	-0.014474	-0.0017105
1647	-0.019405	-0.010845	0.54792	-0.0096536	-0.017208	-0.035423	-0.014989	0.0094341	0.022485	0.0044099	-0.015684	0.012938	-0.005935	0.047664	-0.040083	-0.014119	-0.017985	-0.017985	0.10119	0.0070698	-0.01649	0.019852	-0.020493	-0.025976	0.00096683	0.041476	0.01408	-0.036427	0.027269	0.012248	-0.017782	0.016801	0.001208	-0.077735	-0.038505	-0.025825	-0.023983	-0.012156	-0.012331	-0.0094222	-0.0043174	0.041588	0.048644	0.0036739	0.036929	0.059356	-0.034133	-0.02353	-0.014077
2770	-0.031542	-0.017917	0.50033	-0.00079004	-0.033962	-0.046823	0.0062422	-0.010211	0.078406	0.013479	-0.040722	0.0080423	-0.01384	0.047737	-0.027153	-0.020859	-0.020693	-0.020693	0.11088	-0.0037581	-0.0034249	0.025967	0.0053275	-0.0015934	0.0047266	0.048198	0.024434	-0.039937	0.0091747	0.024055	-0.02517	0.0093325	-0.016528	-0.080958	-0.041801	-0.0011581	-0.054675	-0.038162	0.0068442	-0.009552	-0.010462	0.013143	0.045046	0.041853	0.058207	0.048078	-0.018078	0.019524	-0.0043475
9628	-0.023711	-0.027316	0.64894	-0.025282	-0.02373	-0.047718	-0.01524	-0.028784	0.021029	-0.0021927	-0.027066	0.0032314	-0.00082266	0.03525	-0.040844	-0.013681	-0.0077209	-0.0077209	0.13743	-0.0046668	-0.026137	0.029714	-0.01329	-0.024144	-0.0042046	0.046685	0.013061	-0.039947	0.0043556	0.018326	-0.029243	0.00023438	-0.015891	-0.088179	-0.048697	-0.023938	-0.048717	-0.029895	-0.011116	-0.023391	-0.011649	0.035079	0.043738	0.013819	0.067738	0.027935	-0.035857	-0.0026803	-0.018457
2776	-0.031484	-0.018585	0.50938	-0.0018386	-0.033805	-0.046181	0.0041961	-0.01097	0.073175	0.012029	-0.040241	0.0077001	-0.013971	0.04792	-0.028981	-0.019665	-0.019837	-0.019837	0.11199	-0.0044869	-0.0054178	0.025539	0.0038293	-0.0017291	0.0046209	0.048351	0.023467	-0.039021	0.0089712	0.023997	-0.025818	0.01002	-0.015849	-0.080357	-0.042691	-0.0026873	-0.054197	-0.037432	0.0071168	-0.01005	-0.010467	0.015354	0.044722	0.038938	0.06042	0.049511	-0.01986	0.018387	-0.0044425
2588	-0.041595	-0.021456	0.71346	-0.017867	-0.029635	-0.062479	-0.0032301	-0.039992	0.05069	0.011721	-0.03387	-0.0035607	-0.0025559	0.057902	-0.030161	-0.025739	-0.010766	-0.010766	0.11859	-0.020493	-0.018074	0.03814	-0.0034756	-0.018939	-0.0066695	0.039088	0.0047916	-0.049349	-0.017557	0.022366	-0.038007	0.0020824	-0.024433	-0.095777	-0.052334	-0.0038364	-0.067053	-0.047672	-0.00618	-0.029513	-0.010624	0.0075828	0.046342	0.023084	0.012206	0.039033	-0.031338	-0.026885	-0.024601
2620	0	0	0	0	0	0	0	0	0	0	0	0	0	0	0	0	0	0	0	0	0	0	0	0	0	0	0	0	0	0	0	0	0	0	0	0	0	0	0	0	0	0	0	0	0	0	0	0	0
2625	-0.020486	-0.031449	0.60683	-0.0039885	-0.022405	-0.032854	-0.021851	-0.0019544	0.031635	0.0062569	-0.024927	0.0092203	-0.0027208	0.054954	-0.042611	-0.0011648	-0.016284	-0.016284	0.11692	-0.0049877	-0.017517	0.016598	-0.028207	-0.016564	-0.003706	0.049503	0.024029	-0.030013	0.019537	0.021459	-0.026451	0.0089227	0.003549	-0.067361	-0.04336	-0.014801	-0.033707	-0.024013	0.01332	-0.024079	0.008137	0.04489	0.029348	0.0052318	0.052168	0.094727	-0.033688	0.0042381	0.0035408
2626	-0.020549	-0.025354	0.58252	-0.0037118	-0.021096	-0.031021	-0.020704	0.0046742	0.028814	0.0048886	-0.022809	0.0095185	-0.0044481	0.055469	-0.042207	-0.0033616	-0.016218	-0.016218	0.11325	-0.002024	-0.017065	0.01531	-0.029004	-0.01938	-0.002148	0.045025	0.020634	-0.030719	0.025009	0.018064	-0.022267	0.010474	0.0060369	-0.067178	-0.042562	-0.020921	-0.029355	-0.019276	0.0054837	-0.021072	0.0077039	0.045589	0.033167	0.0019693	0.047566	0.087063	-0.035002	-0.0032154	-0.00068634
2782	-0.026902	-0.02118	0.59839	-0.0045422	-0.028338	-0.041109	-0.017339	-0.0033808	0.03198	0.0071395	-0.025211	0.0033823	-0.0070767	0.057686	-0.038557	-0.0075611	-0.01777	-0.01777	0.10759	-0.0078985	-0.019372	0.018541	-0.025926	-0.018017	-0.0038051	0.04202	0.016163	-0.038095	0.015615	0.020344	-0.026397	0.013898	-0.0003672	-0.07614	-0.048197	-0.020388	-0.042132	-0.027817	0.0013508	-0.022313	0.0020761	0.041575	0.031601	0.001967	0.039176	0.073836	-0.034072	-0.013689	-0.00048557
79751	-0.015969	-0.023637	0.45822	-0.029158	-0.057682	-0.077059	-0.027797	-0.091552	0.034465	-0.022129	-0.059822	-0.032302	-0.042957	-0.050791	-0.056418	-0.0044694	-0.030898	-0.030898	0.12588	-0.019475	-0.053781	0.015653	-0.038735	-0.0098912	-0.02415	0.035494	0.022202	-0.093729	-0.013294	0.036739	-0.074583	-0.041524	-0.052423	-0.16024	-0.077847	-0.026501	-0.10692	-0.050114	-0.061145	-0.054043	-0.050109	0.0040005	0.0087666	0.015566	0.075808	-0.054023	-0.038806	-0.054092	-0.0033988
83733	0	0	0	0	0	0	0	0	0	0	0	0	0	0	0	0	0	0	0	0	0	0	0	0	0	0	0	0	0	0	0	0	0	0	0	0	0	0	0	0	0	0	0	0	0	0	0	0	0
2978	-0.021933	-0.023268	0.65172	-0.023487	-0.025512	-0.05195	-0.014984	-0.02557	0.02426	0.00067082	-0.025465	0.0032251	0.00016651	0.036087	-0.041951	-0.013671	-0.0087511	-0.0087511	0.12655	-0.0036099	-0.027655	0.029457	-0.016359	-0.02412	-0.0058672	0.048037	0.012037	-0.044406	0.0027627	0.019254	-0.037088	0.0036218	-0.014589	-0.089422	-0.049267	-0.024011	-0.049484	-0.031159	-0.014224	-0.021476	-0.010813	0.034574	0.0403	0.012784	0.052627	0.033247	-0.034678	-0.016984	-0.017838
5871	-0.022559	-0.015523	0.56669	-0.0060841	-0.0228	-0.038771	-0.021466	0.0040368	0.02609	0.0072218	-0.023754	0.0014307	-0.0033119	0.051178	-0.039682	-0.0058592	-0.015933	-0.015933	0.10298	0.0046293	-0.023003	0.021105	-0.029275	-0.017266	-0.0045474	0.037939	0.017071	-0.040564	0.01886	0.017195	-0.021952	0.0204	0.0043542	-0.075996	-0.048695	-0.026053	-0.034203	-0.02094	-0.00023903	-0.013077	0.0066045	0.044146	0.028098	-0.0017448	0.045562	0.075003	-0.034324	-0.012805	0.013796
440000	-0.028346	-0.0050101	0.68198	-0.024547	-0.011872	-0.054101	-0.020239	-0.012759	0.018531	0.014995	-0.026325	-0.015029	0.012151	0.049648	-0.037679	-0.021344	-0.0091884	-0.0091884	0.12181	0.011358	-0.030183	0.039213	-0.028707	-0.026423	-0.0083093	0.022576	0.0025834	-0.059984	-0.020102	0.0046962	-0.023225	0.015675	0.0019714	-0.093137	-0.051148	-0.031834	-0.037305	-0.027172	-0.01461	-0.012187	0.0056203	0.031358	0.032738	0.0014936	0.020466	0.058068	-0.040244	-0.032682	0.0089347
1440	-0.023005	-0.017322	0.57353	-0.0047018	-0.025585	-0.036901	-0.017541	0.0022751	0.026716	0.0052562	-0.024672	0.0047157	-0.010016	0.048817	-0.040771	-0.0073115	-0.017674	-0.017674	0.10374	-0.002843	-0.02005	0.015721	-0.027176	-0.022155	-0.0035955	0.039138	0.015942	-0.03706	0.024179	0.018407	-0.022343	0.012608	0.0055724	-0.073859	-0.047116	-0.028109	-0.033648	-0.020677	-0.0044371	-0.021673	0.0028444	0.040747	0.032671	-0.00059829	0.045957	0.069382	-0.034418	-0.013279	0.00058407
9181	-0.026336	-0.021652	0.58445	-0.0055019	-0.027426	-0.032845	-0.023863	-0.00057908	0.026769	0.0042769	-0.026845	0.0056753	-0.013096	0.049638	-0.041956	-0.0048482	-0.018893	-0.018893	0.11134	-0.0057796	-0.019721	0.014299	-0.028552	-0.013353	-0.0036762	0.041237	0.018207	-0.041788	0.017555	0.019616	-0.026636	0.012991	0.0012617	-0.075728	-0.047645	-0.021914	-0.037981	-0.022156	0.0075901	-0.023491	0.00094254	0.039731	0.02562	0.00019904	0.063738	0.070962	-0.038521	0.0063235	0.0039377
2934	-0.024932	-0.016755	0.58706	-0.0075425	-0.027998	-0.034858	-0.020032	-0.00071459	0.027247	0.0041947	-0.026663	0.0031903	-0.011539	0.054655	-0.041816	-0.0068706	-0.016521	-0.016521	0.10468	-0.0043658	-0.020934	0.016754	-0.026539	-0.020624	-0.0046157	0.039291	0.014465	-0.04194	0.020401	0.019327	-0.026193	0.010864	0.003328	-0.077238	-0.04954	-0.026331	-0.038731	-0.022616	-0.0031831	-0.022872	0.0030538	0.039061	0.027602	-0.00071217	0.044656	0.065028	-0.036457	-0.01347	-0.0018374
2670	0	0	0	0	0	0	0	0	0	0	0	0	0	0	0	0	0	0	0	0	0	0	0	0	0	0	0	0	0	0	0	0	0	0	0	0	0	0	0	0	0	0	0	0	0	0	0	0	0
9771	-0.022888	-0.022285	0.5934	-0.0049469	-0.026575	-0.037238	-0.020803	-0.0027212	0.02644	0.00324	-0.026582	0.0044456	-0.010004	0.05107	-0.041232	-0.0035322	-0.016331	-0.016331	0.11871	-0.0077868	-0.021021	0.014938	-0.026585	-0.019653	-0.0045793	0.041856	0.017951	-0.036311	0.019416	0.021807	-0.023961	0.0087559	0.00063373	-0.073215	-0.049256	-0.024221	-0.038936	-0.023666	0.0046608	-0.024703	0.0031681	0.043085	0.027397	0.0013308	0.06808	0.069877	-0.034285	0.010358	0.0032806
2688	-0.023156	-0.017095	0.57691	-0.004873	-0.025307	-0.036647	-0.016669	0.0018802	0.027335	0.0048008	-0.02445	0.005314	-0.010983	0.049554	-0.040666	-0.0062622	-0.016536	-0.016536	0.10177	-0.0038262	-0.020033	0.0168	-0.025592	-0.021656	-0.0040572	0.039764	0.016469	-0.037485	0.024192	0.020513	-0.023325	0.012298	0.0032953	-0.074828	-0.047368	-0.026525	-0.034685	-0.021095	-0.003629	-0.020925	0.0028387	0.040448	0.032239	-5.83e-05	0.047105	0.067173	-0.034733	-0.013391	-1.56e-05
2690	-0.024006	-0.01617	0.57281	-0.0058207	-0.024387	-0.038344	-0.018315	0.0031386	0.027972	0.0058309	-0.023176	0.0065269	-0.0099577	0.04944	-0.04136	-0.0086047	-0.016897	-0.016897	0.10196	-0.0021981	-0.019118	0.016347	-0.026472	-0.022064	-0.0027335	0.039407	0.015224	-0.038979	0.022088	0.017909	-0.022968	0.012958	0.0019622	-0.077268	-0.046024	-0.026928	-0.034541	-0.020657	-0.004194	-0.017912	0.00024355	0.041914	0.03604	0.0016486	0.044384	0.065098	-0.034253	-0.015767	-0.0049287
2767	-0.031935	-0.016555	0.51421	-0.0045583	-0.03435	-0.05029	0.009798	-0.017115	0.077162	0.013094	-0.041944	0.0073657	-0.013547	0.04476	-0.028247	-0.024626	-0.019908	-0.019908	0.11674	-0.0046498	-0.0042138	0.029547	0.0092239	-0.0031401	0.0060168	0.048329	0.022507	-0.041848	0.0035713	0.023745	-0.027353	0.0056449	-0.020511	-0.087017	-0.042413	-0.0029525	-0.057488	-0.039267	0.0025795	-0.0090791	-0.015545	0.0090103	0.050188	0.046893	0.059239	0.039293	-0.0183	0.020279	-0.010748
2735	-0.021728	-0.02377	0.58328	-0.0039739	-0.02345	-0.032825	-0.020272	0.0029114	0.029347	0.0043218	-0.023981	0.0070802	-0.0072786	0.054244	-0.042202	-0.0039226	-0.016255	-0.016255	0.10958	-0.0029262	-0.018231	0.015159	-0.029377	-0.01982	-0.003606	0.043516	0.019476	-0.032577	0.023907	0.019241	-0.022878	0.010521	0.0064492	-0.068773	-0.044851	-0.023289	-0.032124	-0.020749	0.0033162	-0.021683	0.0074746	0.045312	0.031746	0.0013381	0.048286	0.084348	-0.034549	-0.0049038	0.00023708
2736	-0.024002	-0.024702	0.59031	-0.0058026	-0.024388	-0.02891	-0.023618	0.0022983	0.027814	0.0036014	-0.025211	0.0081194	-0.0068549	0.054741	-0.043686	-0.0044887	-0.017333	-0.017333	0.112	-0.0036208	-0.019341	0.015373	-0.030718	-0.015336	-0.0027509	0.042726	0.018352	-0.038268	0.019668	0.017222	-0.027527	0.01136	0.0058005	-0.071734	-0.044997	-0.020658	-0.033187	-0.020204	0.0066112	-0.023788	0.0056372	0.042164	0.027126	-0.00021173	0.048839	0.08157	-0.038964	-0.0023475	-0.00028142
2737	-0.022398	-0.020123	0.58113	-0.0053251	-0.024111	-0.036334	-0.019596	0.0023978	0.027215	0.0047649	-0.024419	0.0067498	-0.0071661	0.051128	-0.041376	-0.0057621	-0.017188	-0.017188	0.1089	-0.0031718	-0.019369	0.015942	-0.027317	-0.020643	-0.0022985	0.042801	0.018033	-0.035781	0.024361	0.018318	-0.02376	0.011123	0.0034255	-0.073411	-0.045827	-0.025089	-0.03316	-0.020857	-0.0011937	-0.022088	0.0031293	0.041641	0.033302	0.00052801	0.045673	0.072536	-0.034675	-0.010884	-0.0017979
6517	-0.021816	-0.020492	0.56418	-0.0062623	-0.034584	-0.045674	-0.020891	-0.01884	0.031025	-0.00024503	-0.033769	-0.0016493	-0.018736	0.032769	-0.046876	-0.0023958	-0.020021	-0.020021	0.11429	-0.0076266	-0.028336	0.015763	-0.031103	-0.016982	-0.0080143	0.042005	0.021347	-0.048467	0.017939	0.027389	-0.037629	0.0027118	-0.006949	-0.092743	-0.057702	-0.026116	-0.052209	-0.028876	-0.010068	-0.029566	-0.0040884	0.036322	0.022741	0.00021052	0.061125	0.054441	-0.03502	-0.015911	0.0056323
1437	-0.019405	-0.010845	0.54792	-0.0096536	-0.017208	-0.035423	-0.014989	0.0094341	0.022485	0.0044099	-0.015684	0.012938	-0.005935	0.047664	-0.040083	-0.014119	-0.017985	-0.017985	0.10119	0.0070698	-0.01649	0.019852	-0.020493	-0.025976	0.00096683	0.041476	0.01408	-0.036427	0.027269	0.012248	-0.017782	0.016801	0.001208	-0.077735	-0.038505	-0.025825	-0.023983	-0.012156	-0.012331	-0.0094222	-0.0043174	0.041588	0.048644	0.0036739	0.036929	0.059356	-0.034133	-0.02353	-0.014077
2768	-0.020805	-0.014132	0.54354	-0.0084736	-0.026002	-0.038872	-0.013786	0.00097094	0.032474	0.0062655	-0.023693	0.0082285	-0.011975	0.05466	-0.044884	-0.0077204	-0.013968	-0.013968	0.10402	0.0040721	-0.015538	0.020035	-0.019402	-0.023753	0.0044589	0.044741	0.019573	-0.034069	0.015117	0.017792	-0.024642	0.0088143	-0.0021283	-0.079223	-0.043314	-0.028764	-0.033913	-0.018621	-0.0013892	-0.011068	-0.0039126	0.041934	0.043234	0.017125	0.055881	0.065516	-0.034048	-0.0059057	-0.0092577
10672	-0.020952	-0.014207	0.54292	-0.0081541	-0.025664	-0.038261	-0.013735	0.001923	0.031979	0.0065694	-0.023432	0.0087222	-0.012135	0.054921	-0.044438	-0.0077585	-0.014196	-0.014196	0.10334	0.0042656	-0.015082	0.019771	-0.01913	-0.023613	0.0046251	0.044471	0.01963	-0.033733	0.016144	0.017661	-0.023947	0.0097389	-0.0017607	-0.07825	-0.042615	-0.028239	-0.03292	-0.018043	-0.00079006	-0.010746	-0.0036525	0.04197	0.043448	0.017022	0.055501	0.066218	-0.033874	-0.0058323	-0.0089882
2769	-0.032408	-0.016873	0.51525	-0.0044885	-0.034195	-0.050604	0.0098801	-0.016543	0.077518	0.013188	-0.041887	0.0073192	-0.012622	0.04469	-0.027098	-0.024311	-0.019779	-0.019779	0.11612	-0.0043262	-0.0042564	0.03032	0.0099063	-0.0022503	0.0059216	0.048016	0.022606	-0.041702	0.0051963	0.023684	-0.026967	0.0074875	-0.021293	-0.086752	-0.042679	-0.0024902	-0.057799	-0.039597	0.0032714	-0.0081683	-0.015065	0.0087886	0.049065	0.047107	0.058156	0.039243	-0.017672	0.021164	-0.010291
23566	-0.024219	-0.015864	0.60405	-0.017997	-0.018781	-0.040193	-0.01459	-0.0033741	0.027619	0.0021139	-0.020474	0.0095634	-0.0017373	0.049811	-0.039287	-0.014759	-0.013658	-0.013658	0.11853	0.0015478	-0.015081	0.027024	-0.018755	-0.021936	-0.00056621	0.041734	0.013124	-0.035671	0.014504	0.013379	-0.021854	0.0066434	-0.0071651	-0.086369	-0.041682	-0.023916	-0.036175	-0.020159	-0.0093707	-0.016597	-0.0042625	0.038287	0.046908	0.013275	0.038186	0.050892	-0.036892	-0.015673	-0.018641
2876	-0.025451	-0.024049	0.70564	-0.013338	-0.023002	-0.043819	-0.019954	-0.0097181	0.017905	0.013819	-0.022913	-0.0033431	-0.002678	0.047284	-0.037191	-0.011464	-0.0095116	-0.0095116	0.11235	-0.016262	-0.019372	0.021342	-0.027513	-0.028657	-0.0095102	0.034681	0.0091016	-0.040585	0.00022891	0.019746	-0.029256	0.0054486	-0.0015608	-0.074776	-0.046059	-0.023535	-0.043894	-0.032269	0.0055862	-0.031362	0.0049984	0.035497	0.021805	0.0026576	0.030126	0.068543	-0.032929	-0.013722	-0.009329
2908	-0.019405	-0.010845	0.54792	-0.0096536	-0.017208	-0.035423	-0.014989	0.0094341	0.022485	0.0044099	-0.015684	0.012938	-0.005935	0.047664	-0.040083	-0.014119	-0.017985	-0.017985	0.10119	0.0070698	-0.01649	0.019852	-0.020493	-0.025976	0.00096683	0.041476	0.01408	-0.036427	0.027269	0.012248	-0.017782	0.016801	0.001208	-0.077735	-0.038505	-0.025825	-0.023983	-0.012156	-0.012331	-0.0094222	-0.0043174	0.041588	0.048644	0.0036739	0.036929	0.059356	-0.034133	-0.02353	-0.014077
2885	-0.022736	-0.016353	0.57408	-0.0050546	-0.024548	-0.036324	-0.017323	0.0028775	0.02707	0.0051112	-0.023883	0.0062895	-0.010831	0.049391	-0.040666	-0.0066409	-0.01666	-0.01666	0.10145	-0.0029546	-0.019491	0.01685	-0.025252	-0.021721	-0.0035449	0.040245	0.016555	-0.037538	0.024356	0.019293	-0.023112	0.013064	0.0029961	-0.075228	-0.046271	-0.025869	-0.033734	-0.020268	-0.0036756	-0.01985	0.0021742	0.040481	0.033662	0.0004559	0.046381	0.066699	-0.034697	-0.013978	-0.0015182
51655	0	0	0	0	0	0	0	0	0	0	0	0	0	0	0	0	0	0	0	0	0	0	0	0	0	0	0	0	0	0	0	0	0	0	0	0	0	0	0	0	0	0	0	0	0	0	0	0	0
9687	0	0	0	0	0	0	0	0	0	0	0	0	0	0	0	0	0	0	0	0	0	0	0	0	0	0	0	0	0	0	0	0	0	0	0	0	0	0	0	0	0	0	0	0	0	0	0	0	0
7088	-0.023134	-0.01894	0.58342	-0.0050575	-0.025275	-0.037248	-0.019483	0.00033363	0.028089	0.0048712	-0.024706	0.0046618	-0.0098046	0.050942	-0.040584	-0.0050398	-0.015627	-0.015627	0.10394	-0.004473	-0.020298	0.017288	-0.026492	-0.021052	-0.0042432	0.040172	0.017138	-0.036677	0.022836	0.019726	-0.024365	0.011066	0.0035298	-0.07557	-0.047455	-0.025851	-0.036781	-0.0226	-0.0013641	-0.022394	0.002972	0.041218	0.031038	0.00043923	0.047803	0.068131	-0.035051	-0.01271	-0.0002774
2937	-0.032638	-0.018804	0.63217	-0.013553	-0.024762	-0.039886	-0.020483	-0.0027324	0.023949	0.0063638	-0.02332	0.0011388	-0.0050671	0.052897	-0.040067	-0.014436	-0.015096	-0.015096	0.1034	-0.0069068	-0.0209	0.021579	-0.02627	-0.021321	-0.0045061	0.03711	0.0079856	-0.046504	0.0071542	0.01476	-0.025484	0.012541	-0.0010612	-0.081533	-0.052518	-0.028581	-0.043374	-0.026986	-0.0025235	-0.019402	0.0023923	0.036319	0.030725	0.0020963	0.028842	0.061272	-0.037272	-0.021201	-0.013468
2931	-0.022106	-0.014853	0.572	-0.0057367	-0.022143	-0.03874	-0.022227	0.0036678	0.026247	0.0083554	-0.024507	8.68e-05	-0.0048941	0.051917	-0.041539	-0.0063494	-0.016212	-0.016212	0.10503	0.0058427	-0.023385	0.020417	-0.030785	-0.018295	-0.0053176	0.037108	0.016584	-0.042438	0.013715	0.016729	-0.02304	0.018632	0.0059843	-0.075989	-0.047954	-0.024985	-0.033305	-0.020664	-9.01e-05	-0.014118	0.0070307	0.044622	0.029163	-0.0020351	0.04688	0.077319	-0.03498	-0.01243	0.016173
2932	-0.023046	-0.015889	0.5845	-0.0083914	-0.021701	-0.038404	-0.020882	0.0021767	0.024885	0.0086776	-0.023581	0.0022707	-0.005408	0.049867	-0.040325	-0.0094846	-0.016348	-0.016348	0.10371	0.0027145	-0.02195	0.020919	-0.02858	-0.021238	-0.0048231	0.038661	0.015962	-0.042222	0.014716	0.016173	-0.021045	0.018092	0.0039673	-0.077139	-0.047034	-0.026009	-0.033966	-0.021952	-0.00015169	-0.015345	0.0055335	0.041624	0.032529	-0.001001	0.042447	0.07262	-0.034819	-0.016022	0.0087562
2936	-0.027472	-0.021485	0.72599	-0.023902	-0.025227	-0.054007	-0.014635	-0.031207	0.024671	0.0062663	-0.028219	-0.0042674	-0.0016994	0.039069	-0.039829	-0.011288	-0.0073892	-0.0073892	0.12242	-0.016271	-0.02146	0.029828	-0.019107	-0.028526	-0.0079372	0.042452	0.0083865	-0.047831	-0.0085002	0.022272	-0.040131	-0.0049528	-0.016332	-0.092747	-0.048307	-0.023133	-0.053755	-0.035828	-0.004403	-0.032796	-0.0085249	0.029414	0.031733	0.013628	0.038505	0.04131	-0.035454	-0.01564	-0.020147
92170	-0.022915	-0.011647	0.58806	-0.020152	-0.014855	-0.045605	-0.016451	0.0056865	0.025456	-0.0006747	-0.011419	0.0073266	0.0094806	0.046492	-0.031963	-0.012245	-0.0095809	-0.0095809	0.10185	0.0080563	-0.022737	0.036467	-0.014647	-0.025529	-0.001991	0.03829	0.011593	-0.03509	0.028757	0.011229	-0.018051	0.022318	-0.012205	-0.087494	-0.047979	-0.03359	-0.03409	-0.017076	-0.018115	-0.0013981	-0.0011237	0.042657	0.039932	0.0089353	0.025756	0.043838	-0.033781	-0.026128	-0.021035
2792	-0.035725	-0.026118	0.69734	-0.018827	-0.025848	-0.057822	-0.010743	-0.026953	0.030735	0.010118	-0.0080687	0.0027853	0.01471	0.068548	-0.034232	-0.01958	-0.013064	-0.013064	0.11841	-0.015942	-0.016332	0.035195	-0.017083	-0.02444	-0.0034142	0.047685	0.0082662	-0.050748	-0.0093959	0.018379	-0.034223	0.014884	-0.023786	-0.096176	-0.042383	-0.0097084	-0.053777	-0.036328	-0.0042862	-0.015031	-0.015031	0.055014	0.048971	0.014748	0.012911	0.06186	-0.034858	-0.029259	-0.023645
3002	-0.026938	-0.021604	0.59552	0.00054857	-0.029333	-0.040604	-0.013973	-0.0068608	0.034361	0.0048853	-0.026085	0.010017	-0.012316	0.057186	-0.040913	-0.0070444	-0.0158	-0.0158	0.10372	-0.008667	-0.021044	0.018116	-0.022677	-0.017615	-0.0059286	0.042208	0.014352	-0.039296	0.015464	0.026366	-0.029125	0.019053	-0.0036176	-0.077197	-0.046046	-0.011879	-0.042771	-0.026118	0.001105	-0.021115	0.0027458	0.038989	0.031495	0.0026222	0.044166	0.068829	-0.034801	-0.011591	-0.00014217
3009	-0.018928	-0.026083	0.58628	-0.01041	-0.014228	-0.028888	-0.016946	0.0070133	0.027846	0.00435	-0.01332	0.016074	0.0053653	0.057544	-0.042531	-0.0099652	-0.015787	-0.015787	0.12898	0.0096611	-0.0085664	0.019883	-0.02724	-0.021782	0.0050694	0.044815	0.021102	-0.027209	0.023746	0.010559	-0.016419	0.011329	0.00060194	-0.070057	-0.033809	-0.018991	-0.020929	-0.013549	0.0036384	-0.0051309	0.0030074	0.055954	0.050715	0.01379	0.038151	0.081158	-0.035391	1.13e-05	-0.0161
9421	-0.022144	-0.020835	0.57617	-0.0044906	-0.021971	-0.034988	-0.020003	0.0039843	0.026853	0.0050368	-0.022351	0.007367	-0.0075697	0.051603	-0.041773	-0.0062676	-0.017294	-0.017294	0.10328	-0.0019342	-0.018753	0.015883	-0.027569	-0.020418	-0.0036114	0.042403	0.017563	-0.034528	0.023426	0.018081	-0.022475	0.011742	0.0061298	-0.072097	-0.044185	-0.023605	-0.031721	-0.020013	0.00053744	-0.020185	0.0030194	0.043447	0.03459	0.00084938	0.04569	0.077004	-0.034049	-0.011651	-0.0019604
9464	-0.020667	-0.026681	0.58101	-0.0022175	-0.021379	-0.032369	-0.021563	0.0045045	0.029199	0.0059546	-0.022395	0.0089936	-0.0048514	0.054791	-0.042293	-0.0024742	-0.017083	-0.017083	0.10858	-0.0033545	-0.017288	0.01457	-0.02933	-0.017295	-0.003267	0.044991	0.02141	-0.03008	0.02268	0.019456	-0.023001	0.011737	0.0059629	-0.06615	-0.042642	-0.018334	-0.030962	-0.020963	0.0095597	-0.021323	0.0075624	0.046587	0.031135	0.0017179	0.049385	0.089786	-0.033365	-0.0023508	0.0028396
10542	-0.019405	-0.010845	0.54792	-0.0096536	-0.017208	-0.035423	-0.014989	0.0094341	0.022485	0.0044099	-0.015684	0.012938	-0.005935	0.047664	-0.040083	-0.014119	-0.017985	-0.017985	0.10119	0.0070698	-0.01649	0.019852	-0.020493	-0.025976	0.00096683	0.041476	0.01408	-0.036427	0.027269	0.012248	-0.017782	0.016801	0.001208	-0.077735	-0.038505	-0.025825	-0.023983	-0.012156	-0.012331	-0.0094222	-0.0043174	0.041588	0.048644	0.0036739	0.036929	0.059356	-0.034133	-0.02353	-0.014077
9734	-0.027379	-0.021224	0.5997	-0.0046912	-0.026678	-0.040734	-0.017206	-0.0030281	0.034563	0.008823	-0.025218	0.0059499	-0.0080546	0.055952	-0.038422	-0.0081987	-0.016279	-0.016279	0.10427	-0.0071299	-0.017534	0.02	-0.022712	-0.018665	-0.0041303	0.041982	0.01643	-0.037984	0.016732	0.020818	-0.026147	0.013903	-0.0010996	-0.077423	-0.046431	-0.017888	-0.041709	-0.027488	0.0035359	-0.021091	0.0014198	0.037633	0.034061	0.0042902	0.040104	0.071419	-0.034328	-0.012933	-0.0011054
3065	-0.025478	-0.02513	0.60065	-0.0032359	-0.0248	-0.038736	-0.018341	-0.0015054	0.034967	0.0080942	-0.025914	0.0073181	-0.0062938	0.056944	-0.039381	-0.0067395	-0.017348	-0.017348	0.10926	-0.0067931	-0.017259	0.018481	-0.023954	-0.016951	-0.0039015	0.04522	0.018742	-0.034383	0.017975	0.020473	-0.026073	0.012459	0.0010552	-0.072265	-0.045169	-0.015432	-0.038938	-0.026916	0.0068698	-0.022968	0.0041779	0.037553	0.033068	0.0038363	0.040881	0.082674	-0.033714	-0.0077679	0.00021822
3066	-0.027193	-0.022595	0.60129	-0.0054543	-0.02595	-0.039117	-0.017311	-0.0022774	0.034553	0.0076018	-0.025214	0.0063741	-0.0079089	0.057105	-0.039725	-0.0087957	-0.016082	-0.016082	0.1081	-0.0060815	-0.017206	0.019772	-0.023577	-0.019095	-0.0038698	0.04299	0.016645	-0.037386	0.017117	0.019997	-0.024973	0.012492	-0.00086728	-0.075899	-0.046452	-0.018475	-0.040061	-0.02644	0.0024904	-0.021083	0.0037525	0.038737	0.035406	0.0046825	0.039169	0.074616	-0.034615	-0.011664	-0.0031266
8841	-0.027303	-0.0213	0.60203	-0.0049608	-0.026474	-0.041025	-0.017489	-0.003612	0.034158	0.0082721	-0.025721	0.0052175	-0.0087038	0.055513	-0.038801	-0.0086196	-0.016495	-0.016495	0.10547	-0.0071074	-0.018301	0.020147	-0.022782	-0.018766	-0.0043952	0.041754	0.016066	-0.038067	0.016292	0.020524	-0.026467	0.012833	-0.0011061	-0.07756	-0.046811	-0.018475	-0.042029	-0.027635	0.0023212	-0.022276	0.0014281	0.036591	0.034255	0.0039969	0.039655	0.070776	-0.03446	-0.013631	-0.0014976
10014	-0.023827	-0.021168	0.57854	-0.0031346	-0.025309	-0.037426	-0.019353	0.0022917	0.031098	0.0062596	-0.024138	0.0081374	-0.0085113	0.054581	-0.04053	-0.0057423	-0.017145	-0.017145	0.10494	-0.0036517	-0.017331	0.016534	-0.02607	-0.018765	-0.0031587	0.043861	0.018527	-0.0353	0.022625	0.019745	-0.023893	0.013721	0.0029475	-0.072783	-0.045125	-0.021488	-0.034968	-0.022592	0.0031247	-0.019749	0.0039015	0.041501	0.033817	0.0020363	0.044358	0.07891	-0.034489	-0.0096758	-7.26e-05
3082	-0.023857	-0.016746	0.58188	-0.0058262	-0.026234	-0.037499	-0.016931	4.61e-05	0.02725	0.0038998	-0.025651	0.0038061	-0.011153	0.04947	-0.040485	-0.0062744	-0.01595	-0.01595	0.10318	-0.0044912	-0.021189	0.016941	-0.0261	-0.022429	-0.0043393	0.039309	0.015559	-0.038481	0.024458	0.020366	-0.024005	0.010638	0.0035368	-0.076502	-0.049297	-0.028938	-0.03652	-0.022061	-0.0057497	-0.022309	0.0024655	0.039935	0.031296	-0.00043746	0.04631	0.064263	-0.035212	-0.015126	-0.00088797
3091	-0.021149	-0.024161	0.57686	-0.0030784	-0.021747	-0.032248	-0.020517	0.0049561	0.027824	0.006178	-0.022149	0.0099519	-0.0040575	0.054127	-0.041542	-0.0042702	-0.016926	-0.016926	0.11062	-0.0014293	-0.016915	0.014906	-0.028314	-0.018596	-0.0015643	0.045114	0.020265	-0.031676	0.024307	0.017805	-0.022334	0.012216	0.0049331	-0.068212	-0.042393	-0.020862	-0.029729	-0.019102	0.0054339	-0.02	0.0056624	0.045243	0.034346	0.0022394	0.047425	0.084507	-0.034214	-0.0051693	-0.0011664
3146	-0.022618	-0.023671	0.60065	-0.0060573	-0.023711	-0.035701	-0.018316	-0.002073	0.029313	0.0061798	-0.024571	0.0073671	-0.0064603	0.051778	-0.042237	-0.0053311	-0.015625	-0.015625	0.11357	-0.0031353	-0.018044	0.018379	-0.025769	-0.020267	-0.0027552	0.043466	0.019534	-0.035809	0.019651	0.019858	-0.025609	0.010083	0.00030746	-0.074781	-0.044875	-0.020701	-0.03539	-0.022722	0.0034959	-0.020838	0.0036429	0.04213	0.033774	0.0052946	0.048685	0.07572	-0.035094	-0.0049137	-0.0016437
3148	-0.021707	-0.027827	0.60607	-0.0054136	-0.02339	-0.033999	-0.019731	-0.0023174	0.030826	0.0061124	-0.02469	0.0079377	-0.0045588	0.054021	-0.042963	-0.0033995	-0.015527	-0.015527	0.11735	-0.0034923	-0.01738	0.017542	-0.027651	-0.018624	-0.0028419	0.045784	0.021596	-0.03319	0.018644	0.020575	-0.026095	0.0090636	0.0013388	-0.071118	-0.044252	-0.017928	-0.034895	-0.023385	0.0085118	-0.021784	0.0066061	0.044701	0.032022	0.006122	0.050335	0.085018	-0.034519	0.0012026	0.00010977
3150	0	0	0	0	0	0	0	0	0	0	0	0	0	0	0	0	0	0	0	0	0	0	0	0	0	0	0	0	0	0	0	0	0	0	0	0	0	0	0	0	0	0	0	0	0	0	0	0	0
6767	-0.023775	-0.016527	0.58205	-0.0062133	-0.026168	-0.037597	-0.018132	-8.85e-05	0.027268	0.0038261	-0.025764	0.0037843	-0.011167	0.049483	-0.040388	-0.0063821	-0.015788	-0.015788	0.10372	-0.0042638	-0.021162	0.016888	-0.026204	-0.022416	-0.0041642	0.039327	0.015512	-0.038738	0.024312	0.019217	-0.024186	0.010646	0.003197	-0.077086	-0.049252	-0.029099	-0.036896	-0.022201	-0.0061078	-0.022249	0.002126	0.039979	0.031429	-0.0002516	0.04578	0.063561	-0.035299	-0.015826	-0.0028306
27102	-0.029156	-0.013423	0.58269	-0.010116	-0.022584	-0.033916	-0.024196	0.003783	0.018695	0.010018	-0.026287	-0.0035969	-0.0067566	0.050456	-0.044505	-0.015527	-0.020021	-0.020021	0.10695	0.0066351	-0.024726	0.018356	-0.035447	-0.018283	-0.0061306	0.029869	0.0098261	-0.052765	0.0036164	0.0095567	-0.022412	0.018108	0.0097841	-0.081594	-0.049157	-0.031792	-0.034127	-0.02012	-0.0032644	-0.015543	0.0033397	0.040985	0.026962	-0.0052444	0.036948	0.070578	-0.036762	-0.018552	0.0087904
3315	-0.021749	-0.01862	0.57656	-0.0045877	-0.026915	-0.038024	-0.019104	0.0016619	0.027889	0.0068729	-0.02324	0.0068758	-0.0090957	0.050507	-0.040579	-0.0052591	-0.016444	-0.016444	0.10338	-0.0035061	-0.018463	0.016954	-0.026848	-0.020026	-0.0033011	0.041215	0.018062	-0.037332	0.022074	0.020264	-0.024336	0.014096	0.0013141	-0.074909	-0.046323	-0.023466	-0.035665	-0.021986	0.00089961	-0.019001	0.0031823	0.044315	0.032032	0.0023869	0.046839	0.070705	-0.033918	-0.010819	0.00013462
3337	0	0	0	0	0	0	0	0	0	0	0	0	0	0	0	0	0	0	0	0	0	0	0	0	0	0	0	0	0	0	0	0	0	0	0	0	0	0	0	0	0	0	0	0	0	0	0	0	0
3308	-0.021713	-0.009514	0.54349	-0.023647	-0.012577	-0.044407	-0.015584	0.0059004	0.019723	-0.0019202	-0.011095	0.0046333	0.019293	0.044379	-0.026604	-0.011926	-0.0086361	-0.0086361	0.09916	0.010669	-0.024695	0.037924	-0.016359	-0.019812	0.0015473	0.040616	0.011438	-0.028602	0.035817	0.009927	-0.014233	0.030338	-0.013169	-0.08828	-0.051668	-0.03785	-0.035392	-0.017696	-0.020846	0.012946	-0.003384	0.03766	0.032732	0.0038668	0.024813	0.043469	-0.033651	-0.031518	-0.01864
3320	-0.023064	-0.018194	0.57661	-0.0071688	-0.023036	-0.040739	-0.018446	0.0013196	0.025497	0.0053582	-0.022523	0.0030808	-0.0039735	0.050495	-0.04039	-0.0065266	-0.016445	-0.016445	0.10661	0.00096964	-0.023653	0.020421	-0.027358	-0.017184	-0.0052376	0.040179	0.015876	-0.040791	0.017253	0.018062	-0.023798	0.019487	0.00015633	-0.078138	-0.047564	-0.023535	-0.036297	-0.022595	-9.76e-05	-0.013158	0.0038075	0.044892	0.028862	-8.56e-05	0.049488	0.071307	-0.033839	-0.0088225	0.010318
5688	-0.02403	-0.016435	0.58224	-0.0067472	-0.025852	-0.038172	-0.018328	8.58e-05	0.026417	0.0035508	-0.025892	0.0034225	-0.011145	0.049087	-0.040831	-0.0071218	-0.016053	-0.016053	0.10323	-0.0034304	-0.02146	0.016554	-0.026724	-0.022827	-0.0043987	0.039347	0.014716	-0.039402	0.024038	0.018848	-0.024051	0.010309	0.0053409	-0.077437	-0.04962	-0.030015	-0.036703	-0.022219	-0.0071637	-0.022173	0.0016898	0.039519	0.031783	-0.00068882	0.044565	0.063139	-0.035276	-0.016842	-0.004072
1994	-0.023638	-0.019625	0.58226	-0.0064598	-0.025674	-0.03618	-0.018849	0.00096134	0.029149	0.0056981	-0.024482	0.0056507	-0.0089065	0.051712	-0.040654	-0.0055941	-0.015686	-0.015686	0.10728	-0.0033629	-0.018672	0.016643	-0.02686	-0.020869	-0.0036437	0.040923	0.017317	-0.036632	0.020434	0.019227	-0.023346	0.011769	0.0014363	-0.074896	-0.046687	-0.024795	-0.035915	-0.022046	-8.12e-06	-0.020755	0.0047556	0.043289	0.033169	0.0031224	0.048234	0.07062	-0.03463	-0.0089451	-0.0016912
3364	-0.019405	-0.010845	0.54792	-0.0096536	-0.017208	-0.035423	-0.014989	0.0094341	0.022485	0.0044099	-0.015684	0.012938	-0.005935	0.047664	-0.040083	-0.014119	-0.017985	-0.017985	0.10119	0.0070698	-0.01649	0.019852	-0.020493	-0.025976	0.00096683	0.041476	0.01408	-0.036427	0.027269	0.012248	-0.017782	0.016801	0.001208	-0.077735	-0.038505	-0.025825	-0.023983	-0.012156	-0.012331	-0.0094222	-0.0043174	0.041588	0.048644	0.0036739	0.036929	0.059356	-0.034133	-0.02353	-0.014077
248	-0.036976	-0.015394	0.66007	-0.016694	-0.030222	-0.061185	-0.00032297	-0.028953	0.061969	0.0098061	-0.026838	0.0029921	-0.0013318	0.052909	-0.029353	-0.03313	-0.012292	-0.012292	0.11229	-0.013803	-0.011876	0.041374	0.0099789	-0.018183	-0.0044694	0.040172	0.0064755	-0.051862	-0.014802	0.019913	-0.032636	0.0078481	-0.0297	-0.099059	-0.046323	-0.00096973	-0.064256	-0.04506	-0.0083804	-0.022518	-0.012169	0.0082786	0.063327	0.035078	0.0064614	0.029118	-0.027502	-0.028408	-0.030385
29851	0	0	0	0	0	0	0	0	0	0	0	0	0	0	0	0	0	0	0	0	0	0	0	0	0	0	0	0	0	0	0	0	0	0	0	0	0	0	0	0	0	0	0	0	0	0	0	0	0
1676	-0.036874	-0.017584	0.69198	-0.018784	-0.027018	-0.060125	-0.0050168	-0.032011	0.047172	0.0093518	-0.024192	0.0020594	-0.0015395	0.057029	-0.033041	-0.02842	-0.011511	-0.011511	0.11699	-0.015544	-0.016564	0.038519	-0.00038564	-0.024348	-0.0053241	0.03924	0.0032466	-0.049723	-0.014346	0.01975	-0.035125	0.0052737	-0.025063	-0.097863	-0.047604	-0.0049065	-0.061544	-0.04112	-0.0094773	-0.024257	-0.012224	0.014707	0.058253	0.025497	0.011518	0.043736	-0.032301	-0.02978	-0.029785
8837	-0.019405	-0.010845	0.54792	-0.0096536	-0.017208	-0.035423	-0.014989	0.0094341	0.022485	0.0044099	-0.015684	0.012938	-0.005935	0.047664	-0.040083	-0.014119	-0.017985	-0.017985	0.10119	0.0070698	-0.01649	0.019852	-0.020493	-0.025976	0.00096683	0.041476	0.01408	-0.036427	0.027269	0.012248	-0.017782	0.016801	0.001208	-0.077735	-0.038505	-0.025825	-0.023983	-0.012156	-0.012331	-0.0094222	-0.0043174	0.041588	0.048644	0.0036739	0.036929	0.059356	-0.034133	-0.02353	-0.014077
3458	0	0	0	0	0	0	0	0	0	0	0	0	0	0	0	0	0	0	0	0	0	0	0	0	0	0	0	0	0	0	0	0	0	0	0	0	0	0	0	0	0	0	0	0	0	0	0	0	0
3459	-0.0033521	-0.0030015	0.39281	-0.02064	-0.017665	-0.047407	-0.00036406	-0.0039629	0.045366	0.0040147	-0.014588	0.01602	-0.0091038	0.038388	-0.058231	-0.017849	-0.0032437	-0.0032437	0.10079	0.042992	-0.0084042	0.030585	-0.0078198	-0.039413	0.017591	0.055038	0.02188	-0.017692	-0.016965	0.012371	-0.027824	-0.014358	-0.017089	-0.09324	-0.035236	-0.033023	-0.027875	-0.011931	-0.014611	0.0096756	-0.021183	0.029375	0.074882	0.053095	0.068477	0.033984	-0.031871	0.0053979	-0.043244
3479	-0.023327	-0.016533	0.57526	-0.0048609	-0.024313	-0.036584	-0.01712	0.0027438	0.026853	0.0049943	-0.023971	0.0057718	-0.010953	0.049576	-0.040667	-0.0068026	-0.016614	-0.016614	0.10171	-0.0030444	-0.019845	0.016899	-0.025201	-0.022236	-0.0037881	0.039734	0.016326	-0.037563	0.024624	0.019442	-0.02291	0.012445	0.0028577	-0.074979	-0.04684	-0.026577	-0.033846	-0.020307	-0.0042292	-0.020426	0.0025213	0.040606	0.03341	7.12e-05	0.046372	0.066672	-0.034803	-0.014191	-0.002239
3480	-0.021333	-0.011466	0.54687	-0.0077403	-0.021144	-0.037901	-0.0191	0.006365	0.028375	0.0076915	-0.02311	0.0053002	-0.010026	0.051571	-0.043673	-0.0095422	-0.015581	-0.015581	0.10146	0.010881	-0.019259	0.020354	-0.025589	-0.024323	-0.00014277	0.040122	0.016624	-0.038537	0.016558	0.014493	-0.021082	0.015727	0.0038578	-0.077694	-0.043746	-0.02865	-0.028862	-0.016308	-0.0031684	-0.0085066	7.04e-05	0.042515	0.040389	0.007113	0.049894	0.069619	-0.035193	-0.011525	0.0075946
4792	-0.022447	-0.016701	0.57334	-0.0060654	-0.023525	-0.037378	-0.018615	0.0029512	0.02674	0.0054861	-0.023586	0.0069862	-0.0099722	0.04932	-0.040936	-0.0079527	-0.017091	-0.017091	0.10365	-0.0012375	-0.019075	0.017496	-0.025865	-0.021801	-0.0025502	0.040831	0.016324	-0.038199	0.023688	0.017806	-0.022606	0.012931	0.0028697	-0.07643	-0.045851	-0.026854	-0.033736	-0.020516	-0.0042995	-0.01928	0.00096912	0.040473	0.035646	0.0011839	0.044099	0.066408	-0.034887	-0.015592	-0.0038647
4793	-0.019194	-0.015162	0.54447	-0.0093538	-0.025364	-0.038574	-0.015764	-0.0014177	0.034326	0.0054549	-0.02467	0.0069316	-0.010909	0.052262	-0.046296	-0.0066094	-0.012197	-0.012197	0.10548	0.0046407	-0.017049	0.020465	-0.020563	-0.025228	0.0031606	0.044811	0.020267	-0.032238	0.013765	0.017975	-0.025971	0.0036741	-0.0008421	-0.079794	-0.044907	-0.030007	-0.035071	-0.019281	-0.002122	-0.014256	-0.0031309	0.041772	0.042009	0.017842	0.059627	0.063788	-0.034506	-0.0046214	-0.0086417
3551	-0.021116	-0.014151	0.57497	-0.006172	-0.020588	-0.039407	-0.02362	0.0037706	0.025792	0.009016	-0.024713	-0.0025101	-0.0036985	0.052803	-0.042437	-0.0061643	-0.015768	-0.015768	0.1056	0.0088135	-0.025215	0.022061	-0.03243	-0.017591	-0.0065102	0.035539	0.015942	-0.04438	0.0095468	0.01589	-0.023183	0.019875	0.0073359	-0.075681	-0.048586	-0.024452	-0.032818	-0.020689	0.00080041	-0.012911	0.0097718	0.045326	0.027529	-0.0034059	0.047065	0.081091	-0.035472	-0.012187	0.021458
1147	-0.021544	-0.013963	0.57455	-0.0062974	-0.021266	-0.03922	-0.022622	0.0035276	0.025591	0.0079993	-0.024927	-0.0016973	-0.0050312	0.052079	-0.042296	-0.0067069	-0.016004	-0.016004	0.10518	0.0073049	-0.02475	0.021434	-0.031676	-0.018946	-0.0061916	0.035803	0.015617	-0.043716	0.012155	0.015891	-0.022688	0.018609	0.0074158	-0.076093	-0.048655	-0.026053	-0.032904	-0.020474	-0.0012385	-0.013988	0.0085657	0.044517	0.028671	-0.0030612	0.046368	0.077851	-0.035496	-0.013502	0.018098
8517	-0.020236	-0.012072	0.54062	-0.0098675	-0.026077	-0.039567	-0.014353	-0.00032587	0.031843	0.0047039	-0.025226	0.0067357	-0.013077	0.05064	-0.04596	-0.0085117	-0.013153	-0.013153	0.1046	0.0049057	-0.017443	0.019632	-0.020423	-0.026372	0.003666	0.043829	0.018327	-0.035115	0.016129	0.016914	-0.024911	0.005265	-0.0012451	-0.081723	-0.045799	-0.033638	-0.034379	-0.018419	-0.0070561	-0.012827	-0.0045373	0.039461	0.043258	0.015963	0.05616	0.058922	-0.034649	-0.0088055	-0.011988
3589	-0.022491	-0.016949	0.57676	-0.0048932	-0.025097	-0.035788	-0.014317	0.0023408	0.026543	0.0040614	-0.02464	0.0038111	-0.011014	0.049653	-0.040968	-0.006426	-0.016191	-0.016191	0.10092	-0.0052119	-0.021461	0.016027	-0.026401	-0.023953	-0.0052763	0.037589	0.014301	-0.036413	0.025103	0.020628	-0.022391	0.011067	0.0082666	-0.072586	-0.048047	-0.029221	-0.033073	-0.019909	-0.0057276	-0.022978	0.0042738	0.040344	0.030508	-0.0025126	0.047683	0.06714	-0.03449	-0.013395	0.0029969
3595	-0.0049849	-0.0015991	0.3768	-0.020564	-0.018178	-0.048077	0.001931	-0.0028724	0.044981	0.0048269	-0.014347	0.01711	-0.0097506	0.038809	-0.057172	-0.018639	-0.0039053	-0.0039053	0.0994	0.041422	-0.0056925	0.029709	-0.0057122	-0.039544	0.020518	0.054063	0.02174	-0.017076	-0.018738	0.011373	-0.02624	-0.014717	-0.017735	-0.093659	-0.03311	-0.033413	-0.02798	-0.010522	-0.013844	0.011487	-0.022187	0.028012	0.078343	0.056995	0.068697	0.030809	-0.02997	0.0057961	-0.046047
3552	-0.025233	-0.017202	0.5829	-0.0067309	-0.027209	-0.033206	-0.0199	0.00065987	0.027205	0.004503	-0.026118	0.0047453	-0.012116	0.050889	-0.041513	-0.007332	-0.017267	-0.017267	0.10331	-0.0038787	-0.02076	0.016503	-0.027116	-0.019537	-0.0046388	0.038361	0.015412	-0.041997	0.020736	0.018567	-0.02573	0.012879	0.0033387	-0.077138	-0.048299	-0.026187	-0.036784	-0.02153	-0.002441	-0.022257	0.0021043	0.039174	0.028471	-0.00087123	0.046757	0.067023	-0.037232	-0.012321	-0.00067155
3553	-0.022492	-0.016017	0.57551	-0.005926	-0.025187	-0.036334	-0.016157	0.0018703	0.026088	0.003758	-0.024638	0.0037005	-0.010712	0.049137	-0.041198	-0.007285	-0.01683	-0.01683	0.1017	-0.0042502	-0.021324	0.016224	-0.02568	-0.023492	-0.0046372	0.038252	0.014925	-0.037357	0.024377	0.018723	-0.022283	0.011688	0.0057882	-0.075052	-0.047404	-0.029477	-0.03362	-0.020307	-0.0067866	-0.021966	0.0023848	0.039443	0.03214	-0.001208	0.046876	0.066153	-0.034323	-0.014888	-0.00060151
3554	-0.019365	-0.011564	0.52334	-0.0081433	-0.025154	-0.039422	-0.013688	0.0029103	0.034253	0.0063155	-0.023412	0.0086588	-0.014594	0.052183	-0.046534	-0.0078236	-0.011906	-0.011906	0.10177	0.0074013	-0.014983	0.01965	-0.019325	-0.027365	0.0055692	0.044454	0.019389	-0.03189	0.014473	0.016558	-0.023353	0.0061796	0.00058878	-0.078971	-0.043373	-0.031821	-0.031372	-0.016685	-0.0040567	-0.0098792	-0.0040507	0.040191	0.045498	0.01863	0.058316	0.061909	-0.034022	-0.0046493	-0.011298
3558	-0.022531	-0.017715	0.58481	-0.0064284	-0.025896	-0.038139	-0.014756	-0.0015621	0.025294	0.0026171	-0.025316	0.0050256	-0.010499	0.047789	-0.041257	-0.0072179	-0.015505	-0.015505	0.10733	-0.0064487	-0.02341	0.016685	-0.024532	-0.023014	-0.0054642	0.037736	0.013663	-0.037551	0.022515	0.020404	-0.024496	0.012827	0.0038555	-0.074908	-0.047934	-0.026963	-0.035026	-0.021148	-0.0049312	-0.021818	0.0019375	0.040127	0.031508	-0.00086708	0.053369	0.062525	-0.035086	-0.010725	0.0025945
3562	-0.017099	-0.012026	0.54398	-0.0072698	-0.015608	-0.033074	-0.012996	0.012456	0.022808	0.0042296	-0.0145	0.012758	-0.0052596	0.048148	-0.040707	-0.013813	-0.018722	-0.018722	0.098259	0.0071689	-0.016742	0.018984	-0.020964	-0.02708	-0.00037663	0.03977	0.013467	-0.033372	0.028316	0.012468	-0.015896	0.017442	0.0078259	-0.072131	-0.036901	-0.02484	-0.018951	-0.0097146	-0.011106	-0.010111	-0.0012202	0.04298	0.047208	0.0010226	0.040043	0.064425	-0.033261	-0.019465	-0.0076948
3565	-0.023175	-0.017091	0.57885	-0.0052082	-0.025809	-0.036903	-0.016629	0.0011062	0.027495	0.0044616	-0.024933	0.0046052	-0.010964	0.049579	-0.040751	-0.0062105	-0.016391	-0.016391	0.10239	-0.0042596	-0.020608	0.016904	-0.025785	-0.021915	-0.0041956	0.039518	0.016037	-0.037839	0.024188	0.020468	-0.023541	0.011787	0.0042713	-0.075342	-0.048033	-0.027223	-0.035355	-0.021495	-0.0043112	-0.021585	0.0028313	0.040264	0.031569	-0.00038897	0.047153	0.066198	-0.034698	-0.013627	0.00042512
3569	-0.02242	-0.015705	0.57406	-0.0056314	-0.024192	-0.035626	-0.013979	0.0029917	0.026001	0.0038178	-0.024024	0.0043419	-0.010871	0.048951	-0.040793	-0.0076879	-0.016449	-0.016449	0.10035	-0.0044155	-0.021292	0.016456	-0.025823	-0.024585	-0.0049732	0.03725	0.013893	-0.037061	0.025843	0.019563	-0.021565	0.011473	0.0072727	-0.073554	-0.047303	-0.029803	-0.03194	-0.018984	-0.0076732	-0.021967	0.003052	0.039821	0.032433	-0.0023013	0.04674	0.066631	-0.034973	-0.015228	0.0015855
3576	-0.023664	-0.01774	0.58153	-0.0048856	-0.026535	-0.037537	-0.018252	0.00039014	0.027732	0.0045032	-0.025496	0.0042076	-0.011246	0.050061	-0.040549	-0.005418	-0.016007	-0.016007	0.10294	-0.0046155	-0.020778	0.01652	-0.02627	-0.021521	-0.0045296	0.039694	0.016532	-0.037662	0.023521	0.020189	-0.024417	0.011308	0.0036551	-0.075151	-0.048875	-0.027386	-0.036758	-0.022379	-0.0034267	-0.022312	0.0033552	0.04072	0.030479	-0.0001712	0.047393	0.0665	-0.034905	-0.013133	-0.00088882
3578	0	0	0	0	0	0	0	0	0	0	0	0	0	0	0	0	0	0	0	0	0	0	0	0	0	0	0	0	0	0	0	0	0	0	0	0	0	0	0	0	0	0	0	0	0	0	0	0	0
3838	-0.02399	-0.017824	0.58251	-0.0058787	-0.026442	-0.038025	-0.018883	0.00028251	0.028806	0.0049409	-0.025051	0.0051203	-0.01059	0.050239	-0.040872	-0.0062222	-0.016143	-0.016143	0.10459	-0.0042005	-0.019964	0.016858	-0.026539	-0.021403	-0.0037851	0.040355	0.016653	-0.03826	0.022555	0.019682	-0.024223	0.011406	0.0021117	-0.076439	-0.048161	-0.02704	-0.036963	-0.02256	-0.0033011	-0.021675	0.0026028	0.041426	0.031996	0.0009905	0.0463	0.066698	-0.034946	-0.013647	-0.0015473
3643	-0.021025	-0.01235	0.54849	-0.0077459	-0.021595	-0.037841	-0.0197	0.0058651	0.028961	0.0078101	-0.023073	0.0049433	-0.00873	0.05183	-0.042785	-0.0078001	-0.014766	-0.014766	0.10107	0.010546	-0.019865	0.021771	-0.025206	-0.02262	-0.00035522	0.040397	0.017678	-0.037754	0.01694	0.015496	-0.021636	0.017551	0.0017571	-0.077517	-0.044688	-0.027549	-0.030273	-0.017154	-0.00073088	-0.0072356	0.0013516	0.043103	0.037739	0.0074065	0.051203	0.071256	-0.035001	-0.0096945	0.010672
808	-0.024489	-0.015089	0.57252	-0.0073738	-0.025957	-0.035411	-0.019179	0.0023649	0.025311	0.004987	-0.024249	0.0053015	-0.011081	0.050487	-0.041604	-0.0084577	-0.017742	-0.017742	0.10342	-0.0022907	-0.019663	0.016756	-0.025273	-0.020545	-0.0024246	0.040715	0.015238	-0.040866	0.021713	0.017834	-0.024471	0.012209	0.00173	-0.077435	-0.04619	-0.026189	-0.034674	-0.020264	-0.0046699	-0.019307	0.00045403	0.038393	0.033818	0.00059121	0.043572	0.064567	-0.036132	-0.015853	-0.0042195
3708	-0.019123	-0.024093	0.47939	-0.0070867	-0.04807	-0.058054	-0.020952	-0.051482	0.029164	-0.011216	-0.043704	-0.0051878	-0.034189	0.0037249	-0.062586	-0.00025959	-0.019321	-0.019321	0.12869	-0.005168	-0.044429	0.012631	-0.034424	-0.0092973	-0.007235	0.044911	0.026959	-0.057428	0.044773	0.044164	-0.058035	-0.011639	-0.029595	-0.12034	-0.073721	-0.028024	-0.077297	-0.037123	-0.029378	-0.032425	-0.01908	0.027427	0.007974	-0.0037977	0.084128	0.030211	-0.031823	-0.018655	0.011505
3654	-0.02365	-0.016895	0.59142	-0.0076289	-0.021664	-0.04073	-0.022637	0.00023481	0.024304	0.0096144	-0.023784	-0.0025275	-0.004082	0.050798	-0.04265	-0.0089699	-0.01529	-0.01529	0.10447	0.0046088	-0.024742	0.021741	-0.031192	-0.019371	-0.0065969	0.036732	0.014614	-0.044323	0.0054083	0.016053	-0.023525	0.017706	0.0042485	-0.07732	-0.049567	-0.025709	-0.036696	-0.023683	0.0021118	-0.014377	0.0078523	0.044146	0.029219	-0.0016795	0.043782	0.077576	-0.034508	-0.014324	0.013904
3667	-0.023243	-0.01626	0.56917	-0.0050702	-0.02381	-0.036785	-0.019311	0.0038056	0.026494	0.0071003	-0.023322	0.0054798	-0.0079212	0.050109	-0.040858	-0.0067589	-0.017134	-0.017134	0.10229	0.00062498	-0.02011	0.017549	-0.027729	-0.020499	-0.0035542	0.040067	0.017517	-0.038949	0.020822	0.018162	-0.022345	0.016793	0.0033993	-0.075149	-0.045902	-0.024792	-0.03298	-0.020139	-0.00043561	-0.016356	0.0034034	0.043352	0.033048	-0.00012716	0.046169	0.071688	-0.033825	-0.012355	0.0067938
10458	-0.023854	-0.015457	0.57874	-0.0067998	-0.025473	-0.037302	-0.017731	0.00077889	0.026638	0.0038826	-0.024793	0.0047017	-0.010813	0.049169	-0.040261	-0.0073156	-0.016021	-0.016021	0.10309	-0.0030118	-0.020726	0.017165	-0.025762	-0.02306	-0.0036421	0.039427	0.015207	-0.039228	0.025892	0.018577	-0.023397	0.011348	0.0025183	-0.078027	-0.048513	-0.029458	-0.03561	-0.021105	-0.0076721	-0.020213	0.00075	0.04003	0.03343	2.95e-05	0.044559	0.06227	-0.035596	-0.017456	-0.0045269
148000	-0.020456	-0.012743	0.53785	-0.0092607	-0.026738	-0.039751	-0.014796	7.61e-05	0.032749	0.0060408	-0.02491	0.0077591	-0.012391	0.051102	-0.045772	-0.0081296	-0.013146	-0.013146	0.10502	0.00532	-0.01622	0.019089	-0.020989	-0.025732	0.0043295	0.044358	0.0191	-0.034529	0.015241	0.017226	-0.024979	0.0061396	-0.0013435	-0.080836	-0.045246	-0.032415	-0.03443	-0.018514	-0.0044722	-0.01173	-0.0041984	0.040904	0.043455	0.017152	0.056985	0.061189	-0.034313	-0.0065449	-0.010988
3672	-0.024028	-0.016109	0.58199	-0.006591	-0.026139	-0.037672	-0.018082	-0.00020858	0.026935	0.0037364	-0.025476	0.0036015	-0.011249	0.049163	-0.040404	-0.0067544	-0.015804	-0.015804	0.10368	-0.0041051	-0.021466	0.016973	-0.026127	-0.022996	-0.0041367	0.039016	0.01512	-0.03914	0.024717	0.018883	-0.024115	0.010382	0.0031307	-0.077745	-0.04951	-0.029891	-0.036803	-0.022064	-0.0071589	-0.022147	0.0015676	0.039586	0.031931	-0.00031362	0.045369	0.062354	-0.035637	-0.016672	-0.0038259
3688	-0.024318	-0.016952	0.57934	-0.0056091	-0.026104	-0.03763	-0.017674	0.00024592	0.026155	0.0041512	-0.025014	0.0037168	-0.010635	0.049409	-0.040292	-0.0069373	-0.015874	-0.015874	0.1029	-0.0039854	-0.021014	0.01659	-0.025955	-0.021164	-0.0038673	0.038993	0.015304	-0.038364	0.023715	0.018513	-0.023764	0.01102	0.0031437	-0.076689	-0.048944	-0.029795	-0.037041	-0.021844	-0.0058535	-0.021708	0.0013604	0.040376	0.032492	0.00013481	0.046188	0.063153	-0.034625	-0.016022	-0.0043258
3690	-0.022907	-0.017671	0.58157	-0.0057393	-0.024564	-0.037392	-0.018053	0.0019107	0.026798	0.0051616	-0.023938	0.0051996	-0.010454	0.050642	-0.041669	-0.006785	-0.016298	-0.016298	0.1024	-0.0031337	-0.020284	0.017005	-0.02588	-0.022053	-0.0040087	0.040509	0.015763	-0.038028	0.022082	0.019662	-0.023995	0.01226	0.0089202	-0.075315	-0.046852	-0.025299	-0.034961	-0.021649	-0.0030213	-0.020534	0.002831	0.041024	0.032839	3.7e-05	0.046308	0.068077	-0.034564	-0.01388	-0.0011102
3716	-0.021714	-0.012934	0.57143	-0.0053226	-0.021698	-0.038267	-0.021114	0.0043072	0.025726	0.0070901	-0.024848	0.00015053	-0.0075964	0.050289	-0.041878	-0.0070904	-0.016702	-0.016702	0.10319	0.0062794	-0.023473	0.020184	-0.030276	-0.021142	-0.0058561	0.036662	0.015103	-0.042319	0.016592	0.016334	-0.022884	0.017217	0.0068198	-0.076387	-0.047805	-0.026855	-0.032116	-0.019331	-0.0034991	-0.013996	0.005729	0.043143	0.031151	-0.0024307	0.046696	0.073886	-0.036009	-0.013805	0.016495
3717	-0.023492	-0.014176	0.56773	-0.0070907	-0.022384	-0.034591	-0.021811	0.0045804	0.025125	0.0084606	-0.024432	0.0018233	-0.0077665	0.049424	-0.041846	-0.0084409	-0.017921	-0.017921	0.10299	0.0062737	-0.022368	0.019464	-0.03058	-0.019133	-0.0049943	0.036859	0.015764	-0.044339	0.014265	0.015605	-0.022815	0.019069	0.0056478	-0.077124	-0.046451	-0.025346	-0.031966	-0.019	0.00038774	-0.013456	0.0044922	0.042253	0.030311	-0.0021183	0.04697	0.074562	-0.036629	-0.01238	0.01738
5599	-0.021088	-0.017254	0.57688	-0.0059324	-0.023621	-0.040294	-0.022325	0.00025821	0.026036	0.0066667	-0.024838	0.0012827	-0.00546	0.049962	-0.042272	-0.0052417	-0.015856	-0.015856	0.11051	0.0034208	-0.024943	0.019973	-0.030036	-0.017883	-0.0062131	0.038147	0.016929	-0.041941	0.013777	0.018151	-0.024999	0.017437	0.0028075	-0.076865	-0.049312	-0.023899	-0.035247	-0.021906	0.00076064	-0.015543	0.0064369	0.045171	0.027312	-0.0011857	0.053706	0.07418	-0.035268	-0.00639	0.01605
6416	-0.02218	-0.013196	0.57371	-0.0067245	-0.021814	-0.039054	-0.021599	0.0030346	0.025332	0.0066171	-0.025415	-0.0012717	-0.006245	0.05092	-0.041818	-0.0074771	-0.016098	-0.016098	0.10485	0.0058083	-0.024638	0.02084	-0.030823	-0.020492	-0.005931	0.035796	0.014993	-0.043424	0.015342	0.015598	-0.022164	0.016989	0.0074607	-0.077324	-0.049331	-0.02861	-0.033108	-0.020198	-0.0044711	-0.015206	0.0069686	0.043221	0.029596	-0.0031294	0.045412	0.07304	-0.035771	-0.015654	0.013991
3726	-0.021507	-0.025682	0.59083	-0.0049886	-0.022605	-0.0312	-0.021526	0.00050145	0.030386	0.0053733	-0.022684	0.006184	-0.0048982	0.054799	-0.041547	-0.0025447	-0.014574	-0.014574	0.10854	-0.004096	-0.018826	0.017298	-0.028706	-0.019623	-0.0047512	0.042723	0.019884	-0.031572	0.021707	0.020127	-0.024313	0.0088799	0.0054317	-0.070194	-0.04433	-0.020108	-0.034085	-0.02177	0.0061281	-0.023384	0.0069604	0.04693	0.030433	0.0025556	0.050364	0.081693	-0.035173	-0.0051523	0.0025462
3727	-0.021958	-0.021404	0.58356	-0.0039268	-0.024879	-0.036104	-0.020033	0.0017352	0.028834	0.0037609	-0.025252	0.0055471	-0.0088925	0.052554	-0.041619	-0.0043404	-0.016847	-0.016847	0.10655	-0.0041796	-0.019927	0.015368	-0.028323	-0.02014	-0.004368	0.042905	0.018592	-0.034258	0.02368	0.019861	-0.023847	0.010696	0.0063957	-0.07073	-0.047073	-0.025133	-0.0345	-0.022161	0.00064641	-0.023074	0.0057753	0.042643	0.030293	-7.96e-05	0.048045	0.0806	-0.034046	-0.0084412	0.0007022
57576	0	0	0	0	0	0	0	0	0	0	0	0	0	0	0	0	0	0	0	0	0	0	0	0	0	0	0	0	0	0	0	0	0	0	0	0	0	0	0	0	0	0	0	0	0	0	0	0	0
284000	-0.021426	-0.018084	0.65481	-0.0221	-0.024674	-0.051748	-0.013108	-0.025839	0.027441	0.0012691	-0.025566	-1.55e-05	-0.0023533	0.039053	-0.043483	-0.01425	-0.011823	-0.011823	0.12299	-0.0057272	-0.024179	0.030074	-0.017754	-0.025857	-0.0047333	0.043047	0.010859	-0.048899	-5.2e-05	0.018188	-0.037907	-0.0012406	-0.017456	-0.098746	-0.049133	-0.026082	-0.052015	-0.031654	-0.015346	-0.022941	-0.01293	0.03284	0.044168	0.015422	0.045018	0.037721	-0.036317	-0.022235	-0.019971
3912	-0.025535	-0.021796	0.67209	-0.019776	-0.028838	-0.053761	-0.013633	-0.031806	0.029552	0.0029827	-0.030853	-0.0014932	-0.0052809	0.040089	-0.043177	-0.010775	-0.011105	-0.011105	0.12765	-0.010682	-0.023426	0.02871	-0.019248	-0.024155	-0.0047698	0.043097	0.012896	-0.048423	-0.0041011	0.021151	-0.039895	-0.0039142	-0.017086	-0.098018	-0.051796	-0.025123	-0.055908	-0.035367	-0.0099527	-0.02876	-0.0098944	0.02949	0.036247	0.015166	0.04724	0.03725	-0.036696	-0.015919	-0.016649
3915	-0.021426	-0.018084	0.65481	-0.0221	-0.024674	-0.051748	-0.013108	-0.025839	0.027441	0.0012691	-0.025566	-1.55e-05	-0.0023533	0.039053	-0.043483	-0.01425	-0.011823	-0.011823	0.12299	-0.0057272	-0.024179	0.030074	-0.017754	-0.025857	-0.0047333	0.043047	0.010859	-0.048899	-5.2e-05	0.018188	-0.037907	-0.0012406	-0.017456	-0.098746	-0.049133	-0.026082	-0.052015	-0.031654	-0.015346	-0.022941	-0.01293	0.03284	0.044168	0.015422	0.045018	0.037721	-0.036317	-0.022235	-0.019971
27040	-0.023802	-0.016977	0.57692	-0.0054306	-0.02647	-0.037404	-0.018568	0.0013531	0.027427	0.005501	-0.02475	0.0054661	-0.010175	0.049873	-0.040316	-0.0063244	-0.016304	-0.016304	0.1034	-0.0036337	-0.019484	0.016171	-0.026605	-0.021567	-0.0032738	0.040241	0.016508	-0.037916	0.023404	0.019299	-0.023731	0.012477	0.002781	-0.07594	-0.047486	-0.026963	-0.0359	-0.021701	-0.0028192	-0.020359	0.0021353	0.041401	0.032533	0.0009992	0.046117	0.066661	-0.034606	-0.013569	-0.0017695
3932	-0.025957	-0.015155	0.56111	-0.0044732	-0.025568	-0.040891	-0.013931	6.66e-05	0.038856	0.0090206	-0.02745	0.0041863	-0.0089768	0.047624	-0.037425	-0.011795	-0.018922	-0.018922	0.10072	0.0013958	-0.018328	0.021686	-0.020894	-0.016091	-0.0041896	0.041346	0.016959	-0.041821	0.017309	0.019545	-0.02412	0.01859	-0.0011288	-0.078927	-0.047015	-0.017424	-0.039718	-0.026138	-0.0015239	-0.013814	0.00036215	0.034411	0.03685	0.0057563	0.040749	0.068963	-0.031319	-0.013803	0.01133
3952	0	0	0	0	0	0	0	0	0	0	0	0	0	0	0	0	0	0	0	0	0	0	0	0	0	0	0	0	0	0	0	0	0	0	0	0	0	0	0	0	0	0	0	0	0	0	0	0	0
3953	-0.01861	-0.0082675	0.49029	-0.010476	-0.025168	-0.040942	-0.010872	0.002231	0.037567	0.006682	-0.022718	0.010184	-0.015981	0.051981	-0.048192	-0.0087837	-0.0092452	-0.0092452	0.10093	0.011985	-0.012366	0.020583	-0.016298	-0.030141	0.010302	0.046231	0.020152	-0.029771	0.0093599	0.014735	-0.023545	0.0020741	-0.0034277	-0.082087	-0.041844	-0.035517	-0.030788	-0.014502	-0.0065892	-0.0042262	-0.0080588	0.038881	0.052229	0.027931	0.062337	0.05588	-0.033621	-0.0024236	-0.018994
3984	-0.021973	-0.01319	0.57221	-0.0068276	-0.021105	-0.038766	-0.021881	0.0035854	0.025242	0.0073727	-0.024598	-0.00073126	-0.0054573	0.051095	-0.041727	-0.0075647	-0.016138	-0.016138	0.10454	0.0068033	-0.024448	0.021298	-0.030628	-0.019827	-0.0056729	0.036124	0.015297	-0.043792	0.014318	0.015551	-0.022208	0.018131	0.0063203	-0.077398	-0.048472	-0.027163	-0.032582	-0.019944	-0.0033015	-0.013896	0.0067209	0.043444	0.030155	-0.002943	0.045524	0.074264	-0.035782	-0.015384	0.015178
4000	-0.023045	-0.01961	0.61451	-0.0089588	-0.027735	-0.042894	-0.017407	-0.0095959	0.028399	0.0035949	-0.027453	0.0013492	-0.0095997	0.047225	-0.042128	-0.0063763	-0.01447	-0.01447	0.11105	-0.0066994	-0.022793	0.019956	-0.024666	-0.022263	-0.0054218	0.040621	0.01531	-0.041775	0.015098	0.02109	-0.030374	0.0065333	-0.0018824	-0.0823	-0.051192	-0.027318	-0.044194	-0.027485	-0.0056256	-0.025316	-0.00031337	0.038006	0.031064	0.0035786	0.048406	0.05913	-0.035167	-0.014644	-0.0045756
4001	0	0	0	0	0	0	0	0	0	0	0	0	0	0	0	0	0	0	0	0	0	0	0	0	0	0	0	0	0	0	0	0	0	0	0	0	0	0	0	0	0	0	0	0	0	0	0	0	0
84823	-0.025567	-0.016328	0.65734	-0.022707	-0.026063	-0.051904	-0.013442	-0.02629	0.027716	0.0025118	-0.027353	-0.00075673	-0.0028543	0.03963	-0.04287	-0.015082	-0.012088	-0.012088	0.12396	-0.0066028	-0.024671	0.030699	-0.017798	-0.026484	-0.003944	0.04268	0.011482	-0.050768	-7.78e-05	0.018701	-0.036805	-0.0015238	-0.018397	-0.10131	-0.050513	-0.026384	-0.053203	-0.03121	-0.016516	-0.02331	-0.013954	0.03127	0.04343	0.016067	0.04484	0.037476	-0.03745	-0.022059	-0.021012
4023	-0.031288	-0.021176	0.5656	-0.00058482	-0.032317	-0.046538	-0.0039678	-0.010566	0.06276	0.010148	-0.034956	0.0041129	-0.012916	0.050383	-0.031314	-0.016522	-0.019674	-0.019674	0.10093	-0.010794	-0.011683	0.024458	-0.0079715	-0.0037439	-0.0043739	0.045502	0.019406	-0.038703	0.0097667	0.027277	-0.029557	0.012546	-0.0096175	-0.07859	-0.046868	-0.000775	-0.055065	-0.038608	0.0055636	-0.020625	-0.001361	0.020959	0.037546	0.019314	0.036478	0.061864	-0.024185	-0.0067831	0.0030664
3664	-0.021199	-0.025212	0.58955	-0.0045591	-0.022687	-0.032103	-0.02066	0.0019899	0.028814	0.0039274	-0.024333	0.00699	-0.0041641	0.054887	-0.04262	-0.0034206	-0.015616	-0.015616	0.11429	-0.0036844	-0.018799	0.015504	-0.029435	-0.020265	-0.0030539	0.043977	0.019292	-0.032363	0.023625	0.018642	-0.02414	0.0081398	0.0059736	-0.069124	-0.044934	-0.022621	-0.032113	-0.020607	0.0034864	-0.023522	0.0074874	0.044851	0.031362	0.0013574	0.047853	0.083033	-0.035253	-0.0039488	-0.001119
4040	-0.017313	-0.013344	0.51326	-0.0087574	-0.028937	-0.043411	-0.014385	-0.005604	0.031216	0.0044683	-0.026859	0.009414	-0.017701	0.044721	-0.049494	-0.0063032	-0.01548	-0.01548	0.10937	0.0084089	-0.017757	0.019694	-0.020111	-0.021761	0.0061097	0.044556	0.022374	-0.037428	0.014391	0.020024	-0.029812	0.0060192	-0.0082528	-0.087934	-0.044497	-0.028089	-0.036096	-0.01772	-0.0040951	-0.0093346	-0.0079307	0.040064	0.044017	0.021129	0.066647	0.05506	-0.033262	-0.0029258	-0.0087443
7376	-0.02303	-0.021327	0.58476	-0.0054238	-0.02446	-0.033509	-0.019226	0.0013008	0.02844	0.0040091	-0.024728	0.0053647	-0.0084813	0.052704	-0.041675	-0.0049738	-0.015388	-0.015388	0.10875	-0.0033121	-0.019318	0.015862	-0.028591	-0.021502	-0.0037214	0.04119	0.017384	-0.035193	0.024398	0.018859	-0.02331	0.0096427	0.0053991	-0.072409	-0.046733	-0.026468	-0.033898	-0.020963	-0.0011232	-0.021982	0.0057931	0.043836	0.03189	0.00093569	0.046901	0.074676	-0.035508	-0.0091366	-0.0019932
4067	-0.019972	-0.011508	0.56733	-0.0059753	-0.020681	-0.039228	-0.022345	0.0042919	0.02702	0.0085419	-0.024554	-0.00054542	-0.0070398	0.050526	-0.043956	-0.0069074	-0.015737	-0.015737	0.10431	0.010536	-0.023972	0.021744	-0.031085	-0.021083	-0.005426	0.037765	0.015427	-0.043243	0.011379	0.015739	-0.024706	0.017182	0.0052791	-0.077762	-0.047809	-0.026024	-0.03173	-0.018777	-0.0022315	-0.010068	0.0054814	0.044037	0.032486	-0.00022685	0.049499	0.07679	-0.036806	-0.011461	0.019445
8567	-0.02341	-0.021627	0.58881	-0.0042254	-0.027009	-0.037109	-0.020032	-0.0022919	0.027121	0.0038706	-0.026681	0.0046389	-0.010482	0.050311	-0.041159	-0.0039547	-0.016315	-0.016315	0.11317	-0.0077427	-0.020581	0.014856	-0.026169	-0.018751	-0.0048947	0.0418	0.018145	-0.036196	0.019243	0.021875	-0.025186	0.01126	0.00098789	-0.072884	-0.048428	-0.023423	-0.039013	-0.02427	0.0047339	-0.023379	0.0028526	0.042402	0.027735	0.0007012	0.062872	0.070641	-0.03434	0.0033911	0.0038743
57591	-0.021694	-0.019153	0.58178	-0.0055513	-0.024639	-0.035668	-0.019508	0.00045035	0.028405	0.0048291	-0.024029	0.0053288	-0.0088269	0.050607	-0.040442	-0.0051086	-0.015628	-0.015628	0.10284	-0.0040833	-0.020245	0.018144	-0.025225	-0.021076	-0.0046649	0.040722	0.017633	-0.036128	0.022973	0.019979	-0.024308	0.011344	0.0029365	-0.075222	-0.046526	-0.023348	-0.035812	-0.021842	-0.00101	-0.021545	0.0028272	0.042031	0.031337	0.0010565	0.047924	0.069047	-0.034917	-0.013087	0.00035296
11184	-0.020471	-0.015191	0.56829	-0.0064653	-0.021278	-0.040017	-0.023482	0.0028556	0.027189	0.0081474	-0.024259	-0.0018157	-0.0023846	0.051365	-0.042046	-0.0049943	-0.01478	-0.01478	0.10414	0.0088451	-0.025695	0.02343	-0.031429	-0.016198	-0.0062774	0.037492	0.017192	-0.042513	0.011776	0.017097	-0.023757	0.020625	0.004596	-0.07642	-0.050333	-0.024785	-0.034678	-0.021696	0.0015436	-0.011214	0.0094813	0.045193	0.025628	-0.0026475	0.048562	0.080422	-0.035249	-0.01054	0.021297
11183	-0.021506	-0.014704	0.57076	-0.0066367	-0.021143	-0.039656	-0.023	0.003937	0.025674	0.0076203	-0.024071	-0.0014368	-0.002378	0.051944	-0.040686	-0.0057938	-0.015416	-0.015416	0.10362	0.0075457	-0.025034	0.022902	-0.030906	-0.016586	-0.0059032	0.036423	0.016274	-0.04264	0.014512	0.016362	-0.022242	0.021405	0.0054737	-0.075994	-0.049571	-0.02553	-0.033989	-0.02106	0.00033241	-0.011971	0.0092463	0.044687	0.026533	-0.0032334	0.045785	0.078416	-0.034887	-0.012761	0.019045
5600	-0.020727	-0.014692	0.56912	-0.0056477	-0.022185	-0.039595	-0.021826	0.0022151	0.027935	0.0076535	-0.025005	-0.00064546	-0.005146	0.051085	-0.043229	-0.0057523	-0.015339	-0.015339	0.10564	0.0065665	-0.0246	0.021471	-0.030756	-0.018564	-0.0058366	0.03792	0.017099	-0.042238	0.012267	0.017294	-0.024413	0.016592	0.0058656	-0.077134	-0.049603	-0.026031	-0.034106	-0.021149	-0.0015027	-0.014364	0.0071957	0.044373	0.028212	-0.0018012	0.049311	0.076888	-0.035573	-0.011452	0.016135
5603	-0.020727	-0.014692	0.56912	-0.0056477	-0.022185	-0.039595	-0.021826	0.0022151	0.027935	0.0076535	-0.025005	-0.00064546	-0.005146	0.051085	-0.043229	-0.0057523	-0.015339	-0.015339	0.10564	0.0065665	-0.0246	0.021471	-0.030756	-0.018564	-0.0058366	0.03792	0.017099	-0.042238	0.012267	0.017294	-0.024413	0.016592	0.0058656	-0.077134	-0.049603	-0.026031	-0.034106	-0.021149	-0.0015027	-0.014364	0.0071957	0.044373	0.028212	-0.0018012	0.049311	0.076888	-0.035573	-0.011452	0.016135
5601	-0.022224	-0.015616	0.57423	-0.0050343	-0.02364	-0.038398	-0.019737	0.0017459	0.027721	0.0057922	-0.025021	0.0024654	-0.0083248	0.050036	-0.04184	-0.0058961	-0.015697	-0.015697	0.10462	0.0015973	-0.02255	0.019161	-0.028168	-0.020861	-0.0049017	0.038839	0.016379	-0.040164	0.019678	0.018216	-0.024532	0.013432	0.0041853	-0.077658	-0.048872	-0.027265	-0.035039	-0.021119	-0.0045731	-0.017947	0.0035471	0.041981	0.030795	-0.0010127	0.047731	0.069738	-0.036053	-0.013861	0.0056771
9261	-0.01923	-0.010534	0.53659	-0.010676	-0.022615	-0.040496	-0.018021	0.0022551	0.030877	0.0080968	-0.024879	0.0025569	-0.0078322	0.053723	-0.046639	-0.0088623	-0.013023	-0.013023	0.10623	0.013564	-0.020053	0.023581	-0.024312	-0.022822	0.0026452	0.04164	0.019045	-0.038919	0.0070802	0.014207	-0.022989	0.012239	0.0021513	-0.080844	-0.045708	-0.032067	-0.031455	-0.017164	-0.0022178	-0.006261	0.00063699	0.043458	0.040588	0.014279	0.05692	0.069997	-0.03443	-0.0067737	0.0064833
4082	-0.011708	-0.0085138	0.53584	-0.011302	-0.018075	-0.03499	-0.017557	0.008511	0.023222	0.0020216	-0.01535	0.013445	-0.0077896	0.044977	-0.039336	-0.01593	-0.018028	-0.018028	0.096877	0.014075	-0.015973	0.02319	-0.015273	-0.02576	-0.0020656	0.040447	0.012905	-0.04018	0.028889	0.011326	-0.017318	0.02052	-0.0004565	-0.080272	-0.035773	-0.019163	-0.024417	-0.0094218	-0.016142	-0.0068642	-0.0069175	0.039935	0.048568	0.004876	0.036591	0.054121	-0.034106	-0.029567	-0.015632
53615	-0.019405	-0.010845	0.54792	-0.0096536	-0.017208	-0.035423	-0.014989	0.0094341	0.022485	0.0044099	-0.015684	0.012938	-0.005935	0.047664	-0.040083	-0.014119	-0.017985	-0.017985	0.10119	0.0070698	-0.01649	0.019852	-0.020493	-0.025976	0.00096683	0.041476	0.01408	-0.036427	0.027269	0.012248	-0.017782	0.016801	0.001208	-0.077735	-0.038505	-0.025825	-0.023983	-0.012156	-0.012331	-0.0094222	-0.0043174	0.041588	0.048644	0.0036739	0.036929	0.059356	-0.034133	-0.02353	-0.014077
23643	-0.016717	-0.012684	0.52457	-0.0091329	-0.027061	-0.041082	-0.013673	-0.0022337	0.036339	0.0052403	-0.025162	0.0075758	-0.013388	0.049697	-0.048303	-0.0066385	-0.011436	-0.011436	0.10488	0.0068822	-0.016663	0.021468	-0.019258	-0.024648	0.0047955	0.046778	0.021238	-0.0328	0.010012	0.018551	-0.027853	0.0033073	-0.0038777	-0.082074	-0.045254	-0.031091	-0.035923	-0.019379	-0.0040871	-0.01083	-0.00512	0.040456	0.044186	0.020652	0.062805	0.060919	-0.03432	-0.0026596	-0.011206
1729	-0.023101	-0.01548	0.57881	-0.0060707	-0.02502	-0.036617	-0.015735	0.0015123	0.026092	0.0037666	-0.025117	0.0037032	-0.011078	0.049075	-0.04049	-0.0072626	-0.015848	-0.015848	0.10218	-0.0043164	-0.021432	0.016484	-0.026095	-0.024448	-0.004693	0.037697	0.014034	-0.037935	0.025232	0.018803	-0.02299	0.010348	0.0055825	-0.075414	-0.048589	-0.030724	-0.034233	-0.019872	-0.0080123	-0.022744	0.0024933	0.039311	0.032212	-0.0011319	0.045868	0.06346	-0.035266	-0.016229	-0.0022525
4193	-0.026478	-0.018039	0.58343	-0.0072474	-0.026879	-0.034084	-0.02233	0.00051768	0.02605	0.0044636	-0.025383	0.0055035	-0.011426	0.050011	-0.041978	-0.007419	-0.017932	-0.017932	0.10502	-0.0031983	-0.020616	0.016789	-0.02833	-0.017254	-0.0023486	0.039535	0.015395	-0.043502	0.017988	0.017245	-0.027187	0.014009	0.0024034	-0.078427	-0.047833	-0.025573	-0.036697	-0.021327	-0.00056984	-0.02163	0.0009816	0.039273	0.029374	-0.0005839	0.045468	0.067061	-0.03886	-0.012703	-0.002031
4205	-0.021147	-0.024777	0.57911	-0.0038215	-0.021543	-0.031618	-0.02056	0.0042044	0.028278	0.0061676	-0.022051	0.0094753	-0.0042595	0.053832	-0.041508	-0.0036721	-0.016588	-0.016588	0.1101	-0.0020183	-0.01728	0.015468	-0.027831	-0.018267	-0.0021847	0.045023	0.020669	-0.031648	0.024438	0.018583	-0.022778	0.011854	0.0043316	-0.06844	-0.042604	-0.019989	-0.030379	-0.019584	0.0056197	-0.020784	0.0058288	0.045499	0.033367	0.0020446	0.047898	0.083478	-0.034393	-0.0055639	0.00013999
4208	-0.019861	-0.030157	0.5885	-0.0025241	-0.021183	-0.029561	-0.022133	0.0036005	0.030367	0.0056549	-0.022923	0.0096833	-0.0017575	0.056804	-0.042474	-0.00061956	-0.015901	-0.015901	0.11493	-0.0033548	-0.01698	0.014453	-0.029821	-0.016142	-0.0030492	0.047681	0.022947	-0.028593	0.022403	0.019766	-0.024052	0.010016	0.0052689	-0.063802	-0.042453	-0.016366	-0.030546	-0.02077	0.012151	-0.02292	0.010209	0.047706	0.029761	0.0027332	0.051354	0.094893	-0.033964	0.0028802	0.0025766
4209	-0.020505	-0.024751	0.58696	-0.003607	-0.023241	-0.035301	-0.021095	0.0023929	0.028873	0.0048139	-0.024507	0.007659	-0.004347	0.053582	-0.042125	-0.0028762	-0.017156	-0.017156	0.11221	-0.0043018	-0.01904	0.015196	-0.028575	-0.01825	-0.0028065	0.045612	0.020756	-0.032454	0.022861	0.019802	-0.02481	0.01054	0.0045338	-0.068822	-0.044957	-0.020698	-0.033159	-0.022126	0.0053775	-0.0237	0.0064051	0.043548	0.030223	0.00059981	0.048655	0.084745	-0.033826	-0.0042843	0.0018915
5604	-0.020801	-0.014258	0.57665	-0.0061299	-0.020199	-0.039537	-0.024552	0.0036766	0.025903	0.0095607	-0.024711	-0.00332	-0.0032906	0.053015	-0.04262	-0.005718	-0.015607	-0.015607	0.10574	0.0097179	-0.025688	0.022368	-0.033114	-0.016864	-0.0070306	0.035435	0.01602	-0.044924	0.0074958	0.016058	-0.023921	0.020435	0.006972	-0.075434	-0.048674	-0.02322	-0.033125	-0.021014	0.0022831	-0.012217	0.010471	0.045817	0.026759	-0.0036886	0.047815	0.083304	-0.035548	-0.011193	0.024145
5605	-0.021609	-0.015438	0.57163	-0.0061107	-0.021593	-0.039462	-0.022641	0.0038374	0.026252	0.0075167	-0.024044	-0.0007802	-0.0023641	0.052352	-0.040404	-0.0051407	-0.015335	-0.015335	0.10383	0.0063368	-0.024557	0.022528	-0.03026	-0.01606	-0.0055993	0.037051	0.016785	-0.041818	0.015371	0.017112	-0.022934	0.020973	0.0048874	-0.075673	-0.049487	-0.024845	-0.034493	-0.021356	0.00067733	-0.012775	0.0086383	0.044727	0.026225	-0.002808	0.046319	0.078463	-0.034654	-0.012058	0.01764
5606	-0.024253	-0.016972	0.57957	-0.0057679	-0.026986	-0.037796	-0.018631	0.0004173	0.027389	0.0050907	-0.025431	0.0045873	-0.010182	0.049817	-0.040236	-0.0063483	-0.016059	-0.016059	0.10422	-0.0040275	-0.020086	0.016109	-0.026899	-0.02207	-0.0034785	0.039765	0.01605	-0.038223	0.023561	0.019245	-0.024013	0.011654	0.0032298	-0.076499	-0.048561	-0.028331	-0.036753	-0.022208	-0.0039208	-0.021146	0.002103	0.04114	0.031817	0.00066938	0.045878	0.065398	-0.034846	-0.014179	-0.0022249
5608	-0.024126	-0.012922	0.58756	-0.0081881	-0.020934	-0.039882	-0.023895	0.0050095	0.022908	0.010566	-0.023753	-0.0018359	-0.00093025	0.052675	-0.039866	-0.010011	-0.015865	-0.015865	0.10664	0.0070465	-0.023163	0.021107	-0.033935	-0.022249	-0.0053105	0.034819	0.013524	-0.04366	0.010086	0.012563	-0.019601	0.019874	0.0086057	-0.075634	-0.048238	-0.029248	-0.031194	-0.02081	-0.0015776	-0.013297	0.0088191	0.045356	0.030705	-0.0031842	0.037781	0.078447	-0.035839	-0.016999	0.014263
4214	-0.021403	-0.015127	0.56427	-0.0065803	-0.022533	-0.039411	-0.022371	0.0031301	0.026909	0.0078871	-0.023795	0.00058578	-0.0032855	0.050416	-0.041329	-0.0059223	-0.015375	-0.015375	0.10348	0.0074718	-0.023887	0.021959	-0.030555	-0.017758	-0.0050606	0.038524	0.017254	-0.041319	0.015131	0.01709	-0.022836	0.020069	0.0039218	-0.076881	-0.049292	-0.02595	-0.034386	-0.021154	0.00061899	-0.011191	0.0071652	0.044903	0.028182	-0.0012896	0.047583	0.076874	-0.034936	-0.011395	0.016928
4233	-0.019033	-0.009234	0.5418	-0.0063496	-0.020487	-0.040456	-0.020238	0.0059294	0.030099	0.0090847	-0.023754	0.0014995	-0.0094787	0.052133	-0.046438	-0.0078166	-0.013884	-0.013884	0.10361	0.015125	-0.021211	0.022404	-0.028614	-0.024371	-0.0010485	0.039745	0.016566	-0.039721	0.0087796	0.014129	-0.0236	0.014538	0.0046919	-0.078758	-0.045509	-0.028944	-0.029188	-0.016294	-0.0031979	-0.0060032	0.0022832	0.043989	0.038992	0.0075731	0.053656	0.073646	-0.036579	-0.0079107	0.012718
2117	-0.025567	-0.016328	0.65734	-0.022707	-0.026063	-0.051904	-0.013442	-0.02629	0.027716	0.0025118	-0.027353	-0.00075673	-0.0028543	0.03963	-0.04287	-0.015082	-0.012088	-0.012088	0.12396	-0.0066028	-0.024671	0.030699	-0.017798	-0.026484	-0.003944	0.04268	0.011482	-0.050768	-7.78e-05	0.018701	-0.036805	-0.0015238	-0.018397	-0.10131	-0.050513	-0.026384	-0.053203	-0.03121	-0.016516	-0.02331	-0.013954	0.03127	0.04343	0.016067	0.04484	0.037476	-0.03745	-0.022059	-0.021012
2911	-0.015472	0.0017607	0.38464	-0.023407	-0.022687	-0.04649	0.0031371	-0.0059161	0.047738	0.008962	-0.019157	0.015423	-0.017874	0.046131	-0.051593	-0.015657	0.0011035	0.0011035	0.097728	0.026062	-0.0022837	0.029212	0.00053974	-0.041073	0.026886	0.050916	0.019951	-0.02361	-0.017659	0.0074919	-0.02465	-0.015455	-0.018778	-0.09537	-0.032095	-0.041692	-0.028552	-0.0089321	-0.015588	0.014714	-0.024225	0.028501	0.076406	0.063118	0.069681	0.026886	-0.031706	0.0046044	-0.049534
9525	-0.023763	-0.021227	0.58676	-0.0049909	-0.026793	-0.038675	-0.018218	-0.00044357	0.02934	0.0053832	-0.021666	0.0048636	-0.0054279	0.054955	-0.039324	-0.003362	-0.016076	-0.016076	0.10325	-0.0058683	-0.019906	0.019604	-0.026003	-0.015763	-0.003853	0.043137	0.018455	-0.037607	0.021284	0.021986	-0.025958	0.016899	-0.0019413	-0.075995	-0.047502	-0.020871	-0.039691	-0.024751	0.002926	-0.017471	0.0031177	0.046712	0.028253	0.00098271	0.045545	0.075451	-0.034283	-0.010766	0.0024685
6351	-0.022494	-0.017219	0.57372	-0.0041808	-0.024454	-0.035747	-0.015742	0.0034479	0.026511	0.0047533	-0.023722	0.0052485	-0.010986	0.049894	-0.040573	-0.0062111	-0.016292	-0.016292	0.099647	-0.0045736	-0.020606	0.015791	-0.026136	-0.023439	-0.0053306	0.037843	0.015458	-0.035794	0.024918	0.019839	-0.022284	0.012228	0.0063641	-0.071322	-0.046738	-0.027692	-0.032249	-0.019322	-0.0043019	-0.021889	0.0043431	0.041166	0.031377	-0.0018216	0.047903	0.070347	-0.034735	-0.012764	0.0013906
4286	-0.022253	-0.021201	0.58847	-0.0043835	-0.025675	-0.036954	-0.01973	-3.25e-05	0.028397	0.0041119	-0.025721	0.0045163	-0.0067299	0.051922	-0.041594	-0.0040458	-0.01592	-0.01592	0.10826	-0.0053843	-0.020478	0.016216	-0.027325	-0.020356	-0.0041625	0.041824	0.017964	-0.035515	0.022079	0.020266	-0.025599	0.0095728	0.0042127	-0.073117	-0.048038	-0.024399	-0.03673	-0.023027	0.00057878	-0.024186	0.0049465	0.041648	0.029219	0.00029193	0.048272	0.072602	-0.034425	-0.0088891	0.00025698
5609	-0.024371	-0.015259	0.57249	-0.0071869	-0.024418	-0.035635	-0.021964	0.0033155	0.025895	0.0071219	-0.025075	0.0026037	-0.0080256	0.05145	-0.041513	-0.0076838	-0.017527	-0.017527	0.10402	0.003958	-0.021571	0.018214	-0.029655	-0.018681	-0.0041442	0.038462	0.015762	-0.043314	0.016323	0.016933	-0.024254	0.017569	0.0040129	-0.077408	-0.047401	-0.025214	-0.034402	-0.020416	-0.00064131	-0.015051	0.003654	0.042141	0.029676	-0.0011274	0.045646	0.072494	-0.036584	-0.012385	0.010062
1843	-0.025709	-0.020699	0.58453	-0.0024739	-0.029904	-0.042352	-0.014962	-0.0042497	0.042215	0.0067918	-0.028626	0.0036684	-0.011098	0.051393	-0.038756	-0.0080274	-0.016864	-0.016864	0.10341	-0.0078455	-0.017788	0.0198	-0.0194	-0.013611	-0.0050458	0.04251	0.018287	-0.038588	0.015195	0.024068	-0.028376	0.012757	-0.0023547	-0.07602	-0.049411	-0.016474	-0.045805	-0.030618	0.0034332	-0.023139	0.00361	0.035487	0.032193	0.0072425	0.043959	0.070256	-0.030199	-0.0088804	0.0022617
23209	-0.022838	-0.020173	0.5849	-0.0096069	-0.034393	-0.049311	-0.019032	-0.024834	0.029816	3.38e-05	-0.035138	-0.0021617	-0.015631	0.029895	-0.046685	-0.0035134	-0.019278	-0.019278	0.11906	-0.0081893	-0.030031	0.020019	-0.029013	-0.016893	-0.0065473	0.043134	0.020999	-0.051866	0.013672	0.027678	-0.04142	0.00063953	-0.012781	-0.099535	-0.058095	-0.0256	-0.056179	-0.032022	-0.013223	-0.028746	-0.0079569	0.03431	0.024144	0.0022703	0.061705	0.046981	-0.036421	-0.016545	0.0017616
4638	-0.022424	-0.014641	0.57481	-0.0057323	-0.022874	-0.038721	-0.020794	0.0028057	0.026439	0.0065022	-0.025319	0.00018179	-0.0061823	0.051708	-0.041267	-0.0062428	-0.016012	-0.016012	0.10504	0.0034074	-0.023565	0.020003	-0.029523	-0.019527	-0.005249	0.037033	0.016027	-0.041696	0.017027	0.017048	-0.023281	0.016231	0.0065596	-0.076579	-0.049102	-0.027353	-0.034045	-0.020807	-0.0034337	-0.01681	0.0059586	0.043183	0.029069	-0.0022187	0.046422	0.073016	-0.035212	-0.01409	0.011514
4660	-0.022358	-0.022983	0.65456	-0.023237	-0.025485	-0.05191	-0.014581	-0.02524	0.024182	0.0011404	-0.025532	0.0033497	4.08e-06	0.037343	-0.041464	-0.013553	-0.0089622	-0.0089622	0.12683	-0.0037367	-0.027335	0.029679	-0.015859	-0.024022	-0.0054409	0.047824	0.011907	-0.044641	0.0026622	0.019181	-0.037143	0.0039747	-0.01449	-0.089088	-0.048973	-0.02384	-0.049531	-0.031141	-0.01358	-0.021509	-0.010619	0.034387	0.040651	0.01323	0.052268	0.033717	-0.034627	-0.016331	-0.018048
4293	-0.023318	-0.012027	0.57729	-0.010531	-0.017807	-0.043905	-0.021245	0.0041116	0.022301	0.0099026	-0.021737	-0.0041892	0.0019128	0.051552	-0.042779	-0.012401	-0.014135	-0.014135	0.10308	0.012915	-0.025626	0.025711	-0.030836	-0.019802	-0.0042274	0.034683	0.012004	-0.045232	0.0045637	0.01117	-0.02083	0.020905	0.0057657	-0.080231	-0.04975	-0.031974	-0.033086	-0.020764	-0.0033263	-0.0056829	0.0059053	0.044291	0.032426	0.00065246	0.039212	0.075037	-0.033877	-0.017339	0.011364
8569	-0.022123	-0.015226	0.56948	-0.0062128	-0.022259	-0.03927	-0.021557	0.0037878	0.026102	0.0065445	-0.024133	0.00016377	-0.00306	0.051653	-0.039916	-0.0056439	-0.015542	-0.015542	0.10318	0.0050077	-0.024032	0.02206	-0.029271	-0.016938	-0.0051426	0.037245	0.016616	-0.041082	0.018489	0.017038	-0.022112	0.020184	0.0049469	-0.076137	-0.049666	-0.026584	-0.034483	-0.021098	-0.0012531	-0.013697	0.0075746	0.043851	0.026985	-0.0025172	0.045429	0.075027	-0.034563	-0.013293	0.014229
10857	0	0	0	0	0	0	0	0	0	0	0	0	0	0	0	0	0	0	0	0	0	0	0	0	0	0	0	0	0	0	0	0	0	0	0	0	0	0	0	0	0	0	0	0	0	0	0	0	0
4361	-0.029262	-0.026657	0.60358	-0.0023921	-0.028615	-0.03892	-0.012718	-0.0081247	0.046727	0.0099599	-0.027687	0.0054227	-0.0082977	0.058301	-0.037188	-0.0085056	-0.01671	-0.01671	0.10625	-0.010188	-0.014716	0.021602	-0.018557	-0.011986	-0.0056487	0.045342	0.018803	-0.036175	0.011341	0.02554	-0.029546	0.013392	-0.0049056	-0.07399	-0.047426	-0.0054567	-0.048094	-0.033508	0.010358	-0.020616	0.0037036	0.036204	0.033108	0.010409	0.038565	0.089182	-0.030849	-0.0051028	0.0010365
104000	0	0	0	0	0	0	0	0	0	0	0	0	0	0	0	0	0	0	0	0	0	0	0	0	0	0	0	0	0	0	0	0	0	0	0	0	0	0	0	0	0	0	0	0	0	0	0	0	0
9252	-0.021506	-0.014704	0.57076	-0.0066367	-0.021143	-0.039656	-0.023	0.003937	0.025674	0.0076203	-0.024071	-0.0014368	-0.002378	0.051944	-0.040686	-0.0057938	-0.015416	-0.015416	0.10362	0.0075457	-0.025034	0.022902	-0.030906	-0.016586	-0.0059032	0.036423	0.016274	-0.04264	0.014512	0.016362	-0.022242	0.021405	0.0054737	-0.075994	-0.049571	-0.02553	-0.033989	-0.02106	0.00033241	-0.011971	0.0092463	0.044687	0.026533	-0.0032334	0.045785	0.078416	-0.034887	-0.012761	0.019045
2475	-0.022724	-0.020504	0.59329	-0.0063431	-0.021827	-0.03756	-0.02248	0.0018242	0.02677	0.0079826	-0.024448	0.0017264	-0.0045	0.052678	-0.041172	-0.006681	-0.016394	-0.016394	0.10601	0.0011289	-0.022189	0.019704	-0.030512	-0.018813	-0.0062709	0.040604	0.018539	-0.038912	0.013206	0.017735	-0.02143	0.017441	0.006521	-0.072075	-0.047088	-0.022821	-0.034279	-0.023686	0.0058407	-0.017737	0.010124	0.043411	0.028123	-0.0017746	0.045385	0.0864	-0.033961	-0.0094089	0.013591
4615	-0.023373	-0.016355	0.57667	-0.0060079	-0.024967	-0.037402	-0.017903	0.0017056	0.026182	0.0042134	-0.024744	0.0049888	-0.01087	0.04896	-0.040934	-0.0075278	-0.016635	-0.016635	0.10177	-0.0030413	-0.020037	0.016461	-0.026022	-0.022072	-0.0040637	0.039946	0.01554	-0.038193	0.02377	0.018829	-0.023406	0.011769	0.0041989	-0.076202	-0.047532	-0.027869	-0.035047	-0.02136	-0.0051983	-0.020541	0.0015235	0.039851	0.033113	-7.35e-05	0.045155	0.065739	-0.035012	-0.015744	-0.0034051
4542	-0.021399	-0.016472	0.57537	-0.0069575	-0.025626	-0.038384	-0.019362	0.0007691	0.026744	0.0029588	-0.024688	0.0045897	-0.0081055	0.049203	-0.038961	-0.0057232	-0.014897	-0.014897	0.10149	-0.0025299	-0.022146	0.020206	-0.024056	-0.019984	-0.0041412	0.039363	0.01553	-0.038593	0.028655	0.019628	-0.023116	0.015384	0.00054598	-0.077859	-0.049761	-0.02725	-0.037388	-0.021652	-0.0063564	-0.018571	0.0026469	0.040548	0.029314	-0.0011418	0.044	0.064043	-0.034947	-0.017584	-0.0027774
4661	-0.03157	-0.02365	0.66579	-0.020302	-0.027711	-0.037702	-0.021147	-0.022677	0.02591	0.0025135	-0.032619	0.0046951	-0.0035769	0.047792	-0.045091	-0.013491	-0.015915	-0.015915	0.13262	-0.0079497	-0.022529	0.025403	-0.02478	-0.017914	-0.0016226	0.04187	0.01213	-0.053601	-0.0015481	0.014061	-0.039913	0.0012126	-0.0090478	-0.095904	-0.04801	-0.021648	-0.047164	-0.027833	-0.0026298	-0.029679	-0.0093575	0.025885	0.029753	0.0098167	0.04321	0.049264	-0.044841	-0.0067919	-0.018179
56259	-0.024326	-0.016876	0.58045	-0.005999	-0.026591	-0.037961	-0.018764	-0.000112	0.026874	0.0045204	-0.02606	0.0037515	-0.010795	0.048875	-0.04039	-0.0068498	-0.01664	-0.01664	0.10536	-0.003499	-0.020896	0.016349	-0.027009	-0.022125	-0.0033884	0.039539	0.015746	-0.03872	0.024199	0.018542	-0.023902	0.01096	0.0031039	-0.077093	-0.049165	-0.029563	-0.036726	-0.022267	-0.005976	-0.022354	0.0017447	0.039856	0.032053	-1.93e-05	0.044901	0.064155	-0.035244	-0.015677	-0.0028414
4683	-0.022964	-0.020663	0.5801	-0.0047406	-0.024276	-0.033939	-0.018693	0.0025101	0.02789	0.005285	-0.022113	0.0069507	-0.0076912	0.053185	-0.041099	-0.0047753	-0.016074	-0.016074	0.1059	-0.0036783	-0.018059	0.016948	-0.02723	-0.019939	-0.0031623	0.042298	0.018396	-0.036057	0.023351	0.019347	-0.023279	0.012811	0.0026459	-0.073555	-0.044649	-0.023264	-0.033658	-0.020856	0.00066581	-0.018943	0.0037019	0.045381	0.03288	0.0014461	0.046161	0.075271	-0.035302	-0.01036	-0.00084313
4738	-0.01006	-0.014524	0.53961	-0.0089559	-0.011474	-0.033698	-0.017238	0.01276	0.020846	0.0072634	-0.014323	0.014664	-0.0031642	0.04806	-0.040841	-0.013894	-0.020442	-0.020442	0.10647	0.0092972	-0.015144	0.023113	-0.022777	-0.024682	0.0026781	0.04356	0.016667	-0.034086	0.027146	0.010242	-0.016679	0.01841	0.0028846	-0.072665	-0.03615	-0.025762	-0.019787	-0.01189	-0.0072432	-0.010158	-0.0030901	0.045165	0.049285	0.002712	0.034764	0.06893	-0.03262	-0.020951	-0.010599
4772	-0.020647	-0.023702	0.5781	-0.0023733	-0.023615	-0.034207	-0.020855	0.004512	0.030439	0.0059362	-0.023018	0.0099204	-0.0055014	0.05511	-0.04158	-0.0026329	-0.016851	-0.016851	0.10894	-0.0032955	-0.016029	0.015144	-0.027949	-0.01783	-0.0022009	0.04612	0.022323	-0.030482	0.02243	0.020423	-0.023155	0.012525	0.004349	-0.066866	-0.042453	-0.017986	-0.031175	-0.020818	0.0088856	-0.020368	0.0073662	0.04534	0.032351	0.0028425	0.04953	0.08751	-0.033327	-0.0017589	0.0028125
4790	-0.020744	-0.028613	0.61102	-0.0050076	-0.023911	-0.037323	-0.02095	-0.0036346	0.030726	0.0049411	-0.026172	0.007162	-0.0037348	0.053597	-0.04327	-0.0028107	-0.01662	-0.01662	0.11795	-0.0058788	-0.019338	0.017128	-0.028109	-0.017896	-0.0036969	0.048279	0.022181	-0.032813	0.017304	0.021308	-0.027815	0.0079836	0.0025486	-0.070458	-0.045555	-0.018017	-0.036616	-0.025351	0.00877	-0.025	0.0063374	0.042712	0.029675	0.0044744	0.051224	0.090862	-0.033459	0.0013082	0.0012648
4800	-0.02303	-0.021327	0.58476	-0.0054238	-0.02446	-0.033509	-0.019226	0.0013008	0.02844	0.0040091	-0.024728	0.0053647	-0.0084813	0.052704	-0.041675	-0.0049738	-0.015388	-0.015388	0.10875	-0.0033121	-0.019318	0.015862	-0.028591	-0.021502	-0.0037214	0.04119	0.017384	-0.035193	0.024398	0.018859	-0.02331	0.0096427	0.0053991	-0.072409	-0.046733	-0.026468	-0.033898	-0.020963	-0.0011232	-0.021982	0.0057931	0.043836	0.03189	0.00093569	0.046901	0.074676	-0.035508	-0.0091366	-0.0019932
4801	-0.023024	-0.02059	0.58122	-0.0052492	-0.023956	-0.033301	-0.019081	0.0023116	0.028027	0.0044355	-0.023966	0.0063172	-0.0085184	0.052467	-0.041449	-0.0053764	-0.015655	-0.015655	0.10743	-0.0027366	-0.018754	0.016074	-0.027949	-0.021499	-0.003339	0.041388	0.017421	-0.03531	0.024973	0.018537	-0.022761	0.010516	0.004894	-0.072711	-0.045853	-0.026001	-0.032848	-0.020171	-0.001225	-0.020891	0.0049549	0.043561	0.0331	0.0011084	0.046329	0.074074	-0.035607	-0.010068	-0.0024538
4802	-0.020491	-0.027542	0.59183	-0.004401	-0.021483	-0.03018	-0.021817	0.0016942	0.029876	0.0045897	-0.023223	0.0073353	-0.0022611	0.055894	-0.042268	-0.0022437	-0.015138	-0.015138	0.11379	-0.0039283	-0.018516	0.016163	-0.029325	-0.01946	-0.0036595	0.044454	0.020523	-0.030113	0.022986	0.019095	-0.024177	0.0075555	0.0063831	-0.067674	-0.043643	-0.019449	-0.031679	-0.020687	0.0069492	-0.024466	0.0082267	0.046532	0.0307	0.0021447	0.049266	0.0863	-0.035209	-0.002319	0.0014275
4803	-0.017962	-0.011545	0.5436	-0.0074303	-0.015369	-0.03342	-0.014006	0.01214	0.021771	0.0035087	-0.015076	0.012767	-0.0052927	0.047484	-0.040373	-0.014364	-0.018682	-0.018682	0.097344	0.0063445	-0.01553	0.01778	-0.021387	-0.026691	-0.001229	0.039987	0.013806	-0.032135	0.027571	0.012123	-0.016248	0.016648	0.0040622	-0.072117	-0.037794	-0.02613	-0.020108	-0.010446	-0.010661	-0.0099788	-0.0019593	0.042356	0.046858	0.0014797	0.038818	0.067611	-0.034097	-0.021154	-0.011973
4804	-0.017655	-0.009181	0.49497	-0.011171	-0.025841	-0.041453	-0.011201	-5.66e-05	0.038391	0.0064758	-0.023173	0.0094775	-0.015619	0.050885	-0.049719	-0.0086115	-0.0090348	-0.0090348	0.10225	0.011903	-0.013524	0.021391	-0.016549	-0.029353	0.0094243	0.046899	0.020762	-0.030516	0.00687	0.015946	-0.025718	0.00071074	-0.0051158	-0.083479	-0.042762	-0.034536	-0.033039	-0.015947	-0.0058371	-0.0050066	-0.0083084	0.039195	0.051186	0.028604	0.064867	0.056438	-0.033781	-0.001141	-0.018046
9020	-0.020614	-0.013997	0.56958	-0.0061858	-0.021802	-0.039734	-0.022247	0.0022014	0.027307	0.0075835	-0.02506	-0.0012993	-0.0056565	0.05055	-0.043585	-0.0064433	-0.015393	-0.015393	0.10536	0.0075849	-0.025071	0.021762	-0.031436	-0.019377	-0.0062581	0.037428	0.016452	-0.042976	0.011442	0.016662	-0.023942	0.016728	0.00623	-0.077373	-0.049619	-0.026629	-0.033778	-0.020894	-0.0019153	-0.013752	0.0075837	0.044329	0.028788	-0.0021845	0.0488	0.076769	-0.035852	-0.012176	0.017403
51701	-0.021862	-0.014982	0.56742	-0.0081861	-0.02169	-0.036424	-0.022396	0.0030956	0.025654	0.0064849	-0.024239	0.001259	-0.0062834	0.050142	-0.041626	-0.0072299	-0.016319	-0.016319	0.10287	0.0054638	-0.023635	0.022085	-0.029407	-0.017825	-0.0047659	0.038485	0.016284	-0.043475	0.016155	0.016211	-0.023494	0.018803	0.0034493	-0.078399	-0.048836	-0.026797	-0.03428	-0.020514	-0.00073757	-0.012734	0.0049318	0.041745	0.028204	-0.0021661	0.046601	0.073039	-0.036904	-0.01349	0.013617
4830	-0.028452	-0.019194	0.57786	-0.0062991	-0.027934	-0.04147	-0.016479	-0.0042408	0.038807	0.0070891	-0.029248	0.001544	-0.0094041	0.052283	-0.037947	-0.010454	-0.018265	-0.018265	0.1007	-0.00306	-0.020564	0.022285	-0.022003	-0.011625	-0.0054935	0.041061	0.01597	-0.042601	0.013453	0.021661	-0.027424	0.018592	-0.0012994	-0.078988	-0.051627	-0.016088	-0.046554	-0.030308	0.0035069	-0.016339	0.0028985	0.033144	0.028965	0.0039416	0.039784	0.077126	-0.032204	-0.011603	0.0061076
4842	-0.029153	-0.023418	0.64961	-0.01057	-0.025872	-0.0352	-0.022227	-0.00034825	0.0266	0.011964	-0.024894	0.0026574	-0.0075106	0.050642	-0.039219	-0.0063744	-0.012671	-0.012671	0.10667	-0.010732	-0.017952	0.018652	-0.026472	-0.022359	-0.007096	0.039212	0.016074	-0.040374	0.0083387	0.017685	-0.028825	0.0099194	-0.0030237	-0.076011	-0.05044	-0.022142	-0.0422	-0.027829	0.005291	-0.027332	0.0039979	0.039574	0.024986	0.0034795	0.042292	0.06961	-0.038137	-0.0078106	-0.0037187
4846	-0.028303	-0.022776	0.64545	-0.010447	-0.025611	-0.03525	-0.022065	-7.53e-05	0.026329	0.011746	-0.024666	0.0030689	-0.0077742	0.050082	-0.039225	-0.0064917	-0.012816	-0.012816	0.1061	-0.010168	-0.018008	0.018928	-0.02586	-0.022371	-0.0068418	0.039425	0.016167	-0.040576	0.0093289	0.017599	-0.028616	0.010624	-0.0030582	-0.076586	-0.049995	-0.021923	-0.041638	-0.027228	0.0044242	-0.026046	0.0032796	0.039366	0.025733	0.0032393	0.042362	0.069048	-0.038219	-0.0088806	-0.0039425
27035	-0.022883	-0.025444	0.618	-0.0078761	-0.039738	-0.05829	-0.02141	-0.048895	0.020543	-0.0061662	-0.03708	-0.0058081	-0.021322	0.0080971	-0.052752	-2.49e-05	-0.015059	-0.015059	0.12356	-0.01257	-0.041969	0.016368	-0.03132	-0.01578	-0.01512	0.043416	0.020974	-0.055655	0.050063	0.043358	-0.054709	-0.0045094	-0.025201	-0.11032	-0.072527	-0.028611	-0.071505	-0.036898	-0.02635	-0.039306	-0.013929	0.028741	0.0073469	-0.01084	0.066292	0.033283	-0.031492	-0.022559	0.0081032
5579	-0.022908	-0.018461	0.57462	-0.0059744	-0.023103	-0.036246	-0.020817	0.0030135	0.028535	0.0070368	-0.022715	0.0043375	-0.0043738	0.052507	-0.040273	-0.0053822	-0.015985	-0.015985	0.10435	0.00099978	-0.020419	0.019487	-0.027737	-0.019083	-0.0040079	0.040007	0.018777	-0.037848	0.019718	0.018268	-0.022387	0.015757	0.0032359	-0.075411	-0.046405	-0.023255	-0.033858	-0.021148	0.0011633	-0.017223	0.0046242	0.045826	0.0317	0.00063403	0.047754	0.074317	-0.034622	-0.011418	0.0096676
4909	0	0	0	0	0	0	0	0	0	0	0	0	0	0	0	0	0	0	0	0	0	0	0	0	0	0	0	0	0	0	0	0	0	0	0	0	0	0	0	0	0	0	0	0	0	0	0	0	0
4913	-0.025639	-0.022482	0.61857	-0.0055894	-0.026594	-0.038341	-0.017698	-0.0040716	0.032014	0.0070832	-0.025606	0.0040446	-0.0081656	0.064096	-0.040467	-0.0064406	-0.014732	-0.014732	0.10813	-0.0079318	-0.019191	0.019415	-0.025026	-0.02004	-0.0053628	0.041228	0.015532	-0.037553	0.01344	0.021804	-0.028104	0.010683	0.00057381	-0.073941	-0.047934	-0.018261	-0.041937	-0.027153	0.0053761	-0.024174	0.0051293	0.041841	0.030393	0.003245	0.042011	0.076533	-0.034442	-0.0097783	-0.001927
4914	-0.019081	-0.01066	0.52267	-0.0064012	-0.022173	-0.040063	-0.015931	0.0055754	0.030928	0.0077751	-0.02301	0.0068835	-0.012541	0.050827	-0.047454	-0.0091695	-0.014596	-0.014596	0.10172	0.013084	-0.016949	0.020249	-0.023786	-0.025526	0.0034226	0.043123	0.018305	-0.035532	0.011803	0.015084	-0.023954	0.010241	0.00072159	-0.079728	-0.042728	-0.029621	-0.029457	-0.015622	-0.0035617	-0.0055385	-0.0042461	0.042775	0.045628	0.015032	0.0565	0.065535	-0.034593	-0.0062606	-0.0021451
3164	-0.02303	-0.021327	0.58476	-0.0054238	-0.02446	-0.033509	-0.019226	0.0013008	0.02844	0.0040091	-0.024728	0.0053647	-0.0084813	0.052704	-0.041675	-0.0049738	-0.015388	-0.015388	0.10875	-0.0033121	-0.019318	0.015862	-0.028591	-0.021502	-0.0037214	0.04119	0.017384	-0.035193	0.024398	0.018859	-0.02331	0.0096427	0.0053991	-0.072409	-0.046733	-0.026468	-0.033898	-0.020963	-0.0011232	-0.021982	0.0057931	0.043836	0.03189	0.00093569	0.046901	0.074676	-0.035508	-0.0091366	-0.0019932
5933	-0.024054	-0.016371	0.58187	-0.0061422	-0.025897	-0.037671	-0.01826	9.2e-05	0.02693	0.003794	-0.025782	0.0038124	-0.011087	0.049575	-0.040257	-0.0065375	-0.015683	-0.015683	0.10401	-0.0040363	-0.021121	0.016978	-0.026166	-0.02282	-0.0039562	0.038989	0.015262	-0.038778	0.024932	0.018629	-0.023833	0.010461	0.0034508	-0.077568	-0.049155	-0.029914	-0.036576	-0.021891	-0.0067371	-0.022218	0.0017435	0.039439	0.031896	-0.00042949	0.045323	0.062691	-0.0358	-0.01654	-0.0036423
4839	-0.019405	-0.010845	0.54792	-0.0096536	-0.017208	-0.035423	-0.014989	0.0094341	0.022485	0.0044099	-0.015684	0.012938	-0.005935	0.047664	-0.040083	-0.014119	-0.017985	-0.017985	0.10119	0.0070698	-0.01649	0.019852	-0.020493	-0.025976	0.00096683	0.041476	0.01408	-0.036427	0.027269	0.012248	-0.017782	0.016801	0.001208	-0.077735	-0.038505	-0.025825	-0.023983	-0.012156	-0.012331	-0.0094222	-0.0043174	0.041588	0.048644	0.0036739	0.036929	0.059356	-0.034133	-0.02353	-0.014077
5295	-0.023028	-0.017705	0.57674	-0.005874	-0.023659	-0.037601	-0.019765	0.0017296	0.02755	0.0053488	-0.024266	0.0054483	-0.0089043	0.049615	-0.041295	-0.006559	-0.016356	-0.016356	0.10516	-8.81e-05	-0.021751	0.017741	-0.026584	-0.019342	-0.0051118	0.039533	0.017248	-0.038336	0.019517	0.018847	-0.023688	0.015736	0.0011098	-0.075458	-0.047197	-0.023441	-0.034727	-0.021339	-7.64e-05	-0.017702	0.0039739	0.042483	0.031071	0.00021778	0.05003	0.069629	-0.034188	-0.0088471	0.0070698
5934	-0.019405	-0.010845	0.54792	-0.0096536	-0.017208	-0.035423	-0.014989	0.0094341	0.022485	0.0044099	-0.015684	0.012938	-0.005935	0.047664	-0.040083	-0.014119	-0.017985	-0.017985	0.10119	0.0070698	-0.01649	0.019852	-0.020493	-0.025976	0.00096683	0.041476	0.01408	-0.036427	0.027269	0.012248	-0.017782	0.016801	0.001208	-0.077735	-0.038505	-0.025825	-0.023983	-0.012156	-0.012331	-0.0094222	-0.0043174	0.041588	0.048644	0.0036739	0.036929	0.059356	-0.034133	-0.02353	-0.014077
9564	-0.020959	-0.012939	0.53751	-0.0090822	-0.026355	-0.039054	-0.015194	0.0014816	0.03178	0.0064625	-0.024831	0.0081941	-0.01261	0.051593	-0.045485	-0.0087636	-0.013975	-0.013975	0.10477	0.0069888	-0.015566	0.018414	-0.020844	-0.025294	0.0048775	0.044118	0.019006	-0.034272	0.016003	0.0167	-0.023954	0.0078434	-0.0011348	-0.079747	-0.044188	-0.031535	-0.033107	-0.017921	-0.0036201	-0.011182	-0.0039533	0.040828	0.044008	0.016949	0.055675	0.062473	-0.034179	-0.0064816	-0.010634
1029	-0.022068	-0.01776	0.57628	-0.0053821	-0.025165	-0.03799	-0.018684	0.0018755	0.027173	0.0060858	-0.023112	0.007195	-0.0096347	0.049484	-0.040688	-0.0059041	-0.015977	-0.015977	0.10301	-0.0026397	-0.01938	0.017332	-0.025644	-0.020768	-0.0035356	0.040314	0.017	-0.037755	0.022771	0.019403	-0.024086	0.013593	0.00068825	-0.076049	-0.046169	-0.023686	-0.03488	-0.020993	-0.001601	-0.018836	0.0029447	0.041808	0.033129	0.0022499	0.046498	0.067651	-0.034596	-0.01295	-0.0017185
1030	-0.023069	-0.019032	0.58126	-0.0047054	-0.027331	-0.038339	-0.019311	0.00030399	0.028249	0.0059709	-0.024762	0.0053162	-0.0097874	0.050318	-0.040878	-0.0049345	-0.015979	-0.015979	0.10415	-0.0045359	-0.019616	0.016206	-0.027029	-0.020174	-0.0041367	0.040828	0.017559	-0.037313	0.021004	0.020784	-0.025284	0.012448	0.0021676	-0.074798	-0.047723	-0.024242	-0.037441	-0.023089	0.0005046	-0.021004	0.0039063	0.042681	0.030297	0.0016542	0.04796	0.069968	-0.033873	-0.010476	0.00073535
1031	-0.022031	-0.020084	0.57804	-0.0040561	-0.028322	-0.039712	-0.02173	0.0015238	0.0268	0.0065841	-0.023811	0.0062434	-0.0077881	0.050527	-0.040498	-0.0042668	-0.015953	-0.015953	0.10753	-0.0038406	-0.019353	0.014453	-0.03001	-0.020328	-0.0040184	0.040184	0.017372	-0.035787	0.020391	0.019573	-0.024794	0.013333	0.0020651	-0.072577	-0.047877	-0.02416	-0.036038	-0.022831	0.0026034	-0.020455	0.0059783	0.046069	0.029057	0.0019804	0.047997	0.072393	-0.033656	-0.0069238	0.0011292
2909	-0.027387	-0.027747	0.67235	-0.020539	-0.024153	-0.04741	-0.017925	-0.029586	0.025358	0.0015774	-0.029817	0.0010931	-0.0013387	0.04444	-0.040325	-0.0096437	-0.0099684	-0.0099684	0.13802	-0.012369	-0.023652	0.027741	-0.019789	-0.024734	-0.0039447	0.041934	0.013757	-0.039108	0.00059104	0.018511	-0.031569	-0.0035426	-0.012313	-0.092352	-0.047938	-0.023585	-0.050297	-0.032247	-0.0012176	-0.030037	-0.01042	0.034574	0.036145	0.013447	0.063145	0.03938	-0.038943	0.00083876	-0.013499
5375	-0.028126	-0.022206	0.62234	-0.013384	-0.025822	-0.043119	-0.014783	-0.01559	0.034646	0.00040554	-0.030582	0.0061073	-0.002957	0.046483	-0.03715	-0.0052691	-0.011186	-0.011186	0.12809	-0.0066962	-0.015603	0.026242	-0.023477	-0.01872	-0.0051142	0.040143	0.016529	-0.036277	0.0095203	0.019699	-0.026722	0.001123	-0.0079166	-0.085575	-0.044191	-0.021023	-0.047248	-0.029159	-0.0014938	-0.02864	0.0015073	0.041173	0.030162	0.0098253	0.046104	0.047511	-0.038395	-0.0099168	-0.0078698
1026	-0.023171	-0.017273	0.60207	-0.0078888	-0.022266	-0.040279	-0.023035	5.61e-05	0.025542	0.0092639	-0.025207	-0.0025616	-0.0040718	0.052888	-0.041691	-0.0078255	-0.0149	-0.0149	0.10636	0.0026496	-0.024434	0.021945	-0.031135	-0.018848	-0.007054	0.036587	0.015362	-0.043643	0.007351	0.017118	-0.022984	0.017867	0.0063485	-0.075363	-0.049491	-0.024219	-0.03657	-0.02436	0.0031501	-0.017445	0.010716	0.043389	0.027224	-0.0027548	0.043756	0.07943	-0.034609	-0.013068	0.014218
11076	-0.023542	-0.016529	0.57907	-0.0059186	-0.025728	-0.037455	-0.018199	0.00086184	0.027121	0.0044046	-0.025079	0.0047319	-0.011085	0.049329	-0.040419	-0.0065803	-0.01613	-0.01613	0.10264	-0.0038574	-0.020444	0.016908	-0.025845	-0.022064	-0.0040256	0.039814	0.01593	-0.038325	0.024301	0.019301	-0.023653	0.011307	0.0027771	-0.076719	-0.048023	-0.027892	-0.036	-0.021694	-0.0050141	-0.021299	0.0019599	0.040104	0.032169	0.00012006	0.045931	0.064712	-0.035281	-0.01495	-0.0023912
5715	-0.022852	-0.019661	0.58551	-0.0055545	-0.02476	-0.036009	-0.019695	-0.0001884	0.028591	0.0046526	-0.024442	0.0044425	-0.0084167	0.051048	-0.040505	-0.0049389	-0.015409	-0.015409	0.10396	-0.004562	-0.020642	0.017659	-0.026275	-0.021287	-0.0047021	0.040241	0.017328	-0.035856	0.022868	0.019773	-0.024471	0.0099634	0.0036634	-0.0752	-0.047366	-0.02488	-0.036411	-0.022436	-0.0012083	-0.023344	0.0031639	0.041954	0.0309	0.00083199	0.04794	0.068724	-0.035181	-0.012788	0.00025668
2033	-0.025305	-0.025866	0.62403	-0.008937	-0.022259	-0.034025	-0.020139	-0.0017148	0.028668	0.0089399	-0.022695	0.0041682	-0.0041018	0.05423	-0.039832	-0.0076976	-0.013765	-0.013765	0.10698	-0.0058199	-0.018442	0.020595	-0.026658	-0.02214	-0.0065569	0.042081	0.017869	-0.036113	0.014079	0.018687	-0.021173	0.011658	0.0038843	-0.071282	-0.045786	-0.020452	-0.03603	-0.025449	0.0075812	-0.023159	0.010369	0.042873	0.030964	0.0021018	0.040151	0.08266	-0.035274	-0.011657	-0.00025647
902	-0.021747	-0.016617	0.57727	-0.0056004	-0.022164	-0.038945	-0.022248	0.002892	0.02627	0.0084043	-0.022345	-0.0011266	-0.0027433	0.054317	-0.04191	-0.0049881	-0.016527	-0.016527	0.10514	0.0049333	-0.023673	0.021806	-0.03192	-0.01659	-0.0061553	0.038425	0.017584	-0.04343	0.010494	0.017416	-0.023707	0.020378	0.0049508	-0.075944	-0.047223	-0.022435	-0.034269	-0.021906	0.0027941	-0.012451	0.0081147	0.04931	0.027372	-0.0026544	0.046878	0.083392	-0.035066	-0.011016	0.021021
2644	-0.019405	-0.010845	0.54792	-0.0096536	-0.017208	-0.035423	-0.014989	0.0094341	0.022485	0.0044099	-0.015684	0.012938	-0.005935	0.047664	-0.040083	-0.014119	-0.017985	-0.017985	0.10119	0.0070698	-0.01649	0.019852	-0.020493	-0.025976	0.00096683	0.041476	0.01408	-0.036427	0.027269	0.012248	-0.017782	0.016801	0.001208	-0.077735	-0.038505	-0.025825	-0.023983	-0.012156	-0.012331	-0.0094222	-0.0043174	0.041588	0.048644	0.0036739	0.036929	0.059356	-0.034133	-0.02353	-0.014077
1432	-0.020833	-0.015152	0.57005	-0.0054574	-0.021792	-0.039021	-0.022396	0.0028137	0.027669	0.0082342	-0.024592	-0.00030642	-0.0051318	0.051485	-0.042873	-0.0053955	-0.015427	-0.015427	0.10487	0.0069121	-0.024271	0.0214	-0.030731	-0.018021	-0.0058964	0.038115	0.017409	-0.042188	0.011893	0.017483	-0.024492	0.01768	0.0052244	-0.076413	-0.048798	-0.024469	-0.033817	-0.021122	0.00044207	-0.013627	0.0073743	0.044604	0.028159	-0.0018506	0.049546	0.078725	-0.03551	-0.01079	0.017882
8874	-0.019405	-0.010845	0.54792	-0.0096536	-0.017208	-0.035423	-0.014989	0.0094341	0.022485	0.0044099	-0.015684	0.012938	-0.005935	0.047664	-0.040083	-0.014119	-0.017985	-0.017985	0.10119	0.0070698	-0.01649	0.019852	-0.020493	-0.025976	0.00096683	0.041476	0.01408	-0.036427	0.027269	0.012248	-0.017782	0.016801	0.001208	-0.077735	-0.038505	-0.025825	-0.023983	-0.012156	-0.012331	-0.0094222	-0.0043174	0.041588	0.048644	0.0036739	0.036929	0.059356	-0.034133	-0.02353	-0.014077
7157	-0.024275	-0.022554	0.57033	-0.0060299	-0.021753	-0.029716	-0.022618	0.006067	0.026513	0.0053307	-0.021379	0.0096247	-0.0063228	0.05211	-0.041936	-0.0063565	-0.018308	-0.018308	0.10631	0.0019491	-0.0166	0.016182	-0.029037	-0.014655	-0.00054403	0.04391	0.019174	-0.037252	0.022688	0.015612	-0.023495	0.015171	0.0043244	-0.072904	-0.042868	-0.022294	-0.02934	-0.017459	0.005078	-0.017039	0.002553	0.043688	0.034156	0.0016822	0.047358	0.079922	-0.038206	-0.0071431	-0.0028331
6283	-0.026185	-0.017223	0.58307	-0.0068384	-0.027358	-0.032632	-0.021075	0.00091587	0.026794	0.0040102	-0.025918	0.0055783	-0.012577	0.050564	-0.042106	-0.0072897	-0.017529	-0.017529	0.10268	-0.003578	-0.020928	0.016484	-0.027967	-0.01764	-0.0038126	0.038218	0.01479	-0.043745	0.020073	0.01788	-0.027294	0.013767	0.0038192	-0.078063	-0.047921	-0.025544	-0.036491	-0.02078	-0.0016467	-0.022201	0.0012917	0.038439	0.027786	-0.0014108	0.046908	0.065245	-0.038746	-0.011781	-0.0017859
55566	0	0	0	0	0	0	0	0	0	0	0	0	0	0	0	0	0	0	0	0	0	0	0	0	0	0	0	0	0	0	0	0	0	0	0	0	0	0	0	0	0	0	0	0	0	0	0	0	0
4688	-0.024666	-0.017289	0.62875	-0.011074	-0.026292	-0.042029	-0.017522	-0.0074376	0.026953	0.0046371	-0.026382	0.0016918	-0.0085407	0.046743	-0.040941	-0.0074189	-0.013835	-0.013835	0.10809	-0.0075318	-0.022323	0.020724	-0.024132	-0.024514	-0.0062326	0.040666	0.014019	-0.042383	0.016617	0.020931	-0.02969	0.0071335	-0.0021932	-0.082482	-0.049948	-0.027708	-0.042113	-0.02636	-0.0062029	-0.024865	-0.0012641	0.03836	0.03154	0.0029497	0.04472	0.059684	-0.035669	-0.016503	-0.0072835
6198	-0.02218	-0.013196	0.57371	-0.0067245	-0.021814	-0.039054	-0.021599	0.0030346	0.025332	0.0066171	-0.025415	-0.0012717	-0.006245	0.05092	-0.041818	-0.0074771	-0.016098	-0.016098	0.10485	0.0058083	-0.024638	0.02084	-0.030823	-0.020492	-0.005931	0.035796	0.014993	-0.043424	0.015342	0.015598	-0.022164	0.016989	0.0074607	-0.077324	-0.049331	-0.02861	-0.033108	-0.020198	-0.0044711	-0.015206	0.0069686	0.043221	0.029596	-0.0031294	0.045412	0.07304	-0.035771	-0.015654	0.013991
7161	-0.021253	-0.024187	0.58006	-0.004551	-0.021976	-0.032696	-0.020889	0.0046779	0.029148	0.0053294	-0.022301	0.0095419	-0.0043098	0.055079	-0.04181	-0.0043125	-0.016428	-0.016428	0.1111	-0.00093342	-0.016719	0.015653	-0.028721	-0.019494	-0.0018288	0.044916	0.02046	-0.032002	0.024165	0.01812	-0.021776	0.012022	0.0046008	-0.069037	-0.04315	-0.020996	-0.030192	-0.019593	0.0050894	-0.019625	0.0066113	0.046232	0.034448	0.0026792	0.047364	0.084194	-0.034411	-0.0047302	-0.0010687
6196	0	0	0	0	0	0	0	0	0	0	0	0	0	0	0	0	0	0	0	0	0	0	0	0	0	0	0	0	0	0	0	0	0	0	0	0	0	0	0	0	0	0	0	0	0	0	0	0	0
26986	-0.023454	-0.018362	0.58288	-0.0059443	-0.026033	-0.037413	-0.01854	0.00028927	0.028665	0.0046624	-0.024848	0.0048272	-0.010355	0.050648	-0.040887	-0.0056648	-0.015771	-0.015771	0.10488	-0.0038214	-0.019876	0.017042	-0.026273	-0.021	-0.0041891	0.040544	0.016995	-0.037717	0.022241	0.019976	-0.024198	0.011632	0.0015198	-0.075965	-0.047935	-0.025642	-0.036985	-0.022584	-0.0022673	-0.021122	0.003508	0.04193	0.031804	0.0015286	0.047678	0.067755	-0.03464	-0.011793	-0.0012839
5054	-0.022188	-0.018673	0.58001	-0.0046715	-0.025747	-0.03794	-0.018475	0.00051808	0.026856	0.0052276	-0.024395	0.0051201	-0.011068	0.048668	-0.041351	-0.0065209	-0.016398	-0.016398	0.10273	-0.0041456	-0.02104	0.016754	-0.026309	-0.020859	-0.0051371	0.039481	0.016185	-0.037589	0.022088	0.019792	-0.024286	0.011821	0.0013934	-0.075123	-0.047932	-0.025135	-0.035879	-0.021914	-0.002974	-0.021419	0.0037694	0.040897	0.031295	0.000929	0.046692	0.06879	-0.034477	-0.012526	-0.00028713
5058	-0.021967	-0.013236	0.57217	-0.0070391	-0.021121	-0.038778	-0.021924	0.0035545	0.025205	0.007433	-0.024262	-0.00075104	-0.005489	0.051017	-0.041777	-0.0075955	-0.01615	-0.01615	0.10449	0.0068436	-0.024532	0.021302	-0.03064	-0.019926	-0.0056983	0.03611	0.015297	-0.043786	0.014324	0.015551	-0.022253	0.018126	0.0063428	-0.07742	-0.048481	-0.027178	-0.032587	-0.020007	-0.0032838	-0.013806	0.0066804	0.043527	0.03028	-0.0029002	0.045557	0.074217	-0.035782	-0.015352	0.015081
5062	-0.02269	-0.015341	0.57135	-0.0069228	-0.02247	-0.038805	-0.022299	0.0029992	0.025336	0.0077002	-0.024438	0.00073315	-0.0050249	0.050555	-0.041617	-0.0071451	-0.016256	-0.016256	0.10412	0.0058378	-0.023679	0.019828	-0.030787	-0.019018	-0.0055385	0.038123	0.016077	-0.042719	0.013372	0.016675	-0.02307	0.019362	0.0064371	-0.076246	-0.047577	-0.025157	-0.033755	-0.021276	0.00032274	-0.013393	0.0060738	0.044623	0.029964	-0.0023389	0.046658	0.075452	-0.034887	-0.013893	0.016042
2149	-0.01966	-0.0076225	0.48735	-0.010776	-0.022664	-0.037944	-0.0096556	0.0075655	0.035633	0.0080221	-0.021046	0.013335	-0.015761	0.055855	-0.044635	-0.010364	-0.010667	-0.010667	0.0994	0.012835	-0.0079612	0.019838	-0.012541	-0.029697	0.014048	0.044719	0.020339	-0.027841	0.013474	0.01311	-0.017443	0.0074986	-0.0019048	-0.07739	-0.035863	-0.033492	-0.025139	-0.010894	-0.0028475	-0.0015148	-0.0079809	0.039024	0.057014	0.03021	0.058713	0.057	-0.031582	-0.0031787	-0.019795
5074	-0.021804	-0.018315	0.57814	-0.0059172	-0.024622	-0.0366	-0.019641	0.0009107	0.02755	0.0052188	-0.023903	0.0059886	-0.0091508	0.050027	-0.040395	-0.0061274	-0.016407	-0.016407	0.10373	-0.0028164	-0.019797	0.018061	-0.025536	-0.020982	-0.0034996	0.040792	0.017236	-0.036957	0.023368	0.019068	-0.023617	0.012554	0.0024802	-0.076168	-0.045874	-0.02423	-0.035416	-0.021477	-0.0019898	-0.02068	0.00155	0.041518	0.033231	0.0011461	0.046722	0.067995	-0.034799	-0.014272	-0.0011462
142	-0.023472	-0.016986	0.58493	-0.0081935	-0.025163	-0.038054	-0.019653	-0.00035481	0.025347	0.0046038	-0.024981	0.0031734	-0.010688	0.04958	-0.041332	-0.0084866	-0.015853	-0.015853	0.10437	-0.0034393	-0.021281	0.017925	-0.027362	-0.022626	-0.0044647	0.039119	0.01494	-0.039852	0.019965	0.018088	-0.022493	0.011482	0.0029308	-0.077171	-0.048307	-0.028357	-0.036281	-0.022523	-0.003668	-0.021298	0.0043479	0.040305	0.032544	-0.00056602	0.043585	0.065821	-0.035467	-0.017122	-0.0021293
5469	-0.021881	-0.021918	0.58431	-0.0078417	-0.023687	-0.035869	-0.018016	-0.0016266	0.030932	0.0072664	-0.025158	0.0083812	-0.008424	0.054018	-0.042639	-0.0054602	-0.014679	-0.014679	0.10989	-0.00022631	-0.015977	0.019454	-0.021425	-0.020766	0.00095894	0.044554	0.0215	-0.033084	0.017949	0.019041	-0.024525	0.0099014	-0.00069303	-0.075392	-0.042556	-0.021299	-0.034093	-0.021176	0.0061241	-0.018078	0.00038868	0.041582	0.038506	0.013472	0.054112	0.073833	-0.034092	-0.0033029	-0.0033531
2324	-0.019372	-0.0097954	0.53365	-0.0056392	-0.021065	-0.039946	-0.018246	0.0064205	0.031264	0.0085878	-0.023382	0.0047616	-0.012263	0.051105	-0.04688	-0.0081838	-0.014263	-0.014263	0.10274	0.015122	-0.018892	0.02068	-0.026147	-0.026047	0.0010406	0.04146	0.01699	-0.037129	0.011879	0.014909	-0.024204	0.012134	0.0018603	-0.079386	-0.043994	-0.02843	-0.029133	-0.015786	-0.0047425	-0.0069385	-0.0012609	0.042404	0.042689	0.010744	0.054614	0.06895	-0.036866	-0.0071831	0.0027536
5111	-0.023503	-0.018481	0.58173	-0.0047581	-0.025344	-0.037579	-0.018312	0.001291	0.02849	0.0052727	-0.02433	0.005974	-0.010659	0.056103	-0.041376	-0.0062217	-0.016695	-0.016695	0.10285	-0.0030739	-0.019591	0.016759	-0.025998	-0.020437	-0.0040803	0.041013	0.016575	-0.03746	0.021072	0.020245	-0.024858	0.012563	0.0031778	-0.074488	-0.046693	-0.023278	-0.036285	-0.022122	9.91e-05	-0.020458	0.0031509	0.041763	0.032357	0.0010358	0.045853	0.070793	-0.034342	-0.011816	-0.0013875
5138	-0.024461	-0.02244	0.47617	0.0017609	-0.05275	-0.065513	-0.0089238	-0.054403	0.053262	-0.0049228	-0.0513	0.0004693	-0.033507	0.0051908	-0.051399	-0.0040615	-0.026602	-0.026602	0.12351	-0.0082631	-0.035837	0.020631	-0.01887	0.0040473	-0.0097893	0.049799	0.031788	-0.060547	0.040158	0.051136	-0.060109	-0.0013052	-0.033138	-0.11948	-0.070972	-0.0083067	-0.086961	-0.048564	-0.022128	-0.028652	-0.016148	0.016253	0.018307	0.0030984	0.068958	0.024349	-0.024022	-0.015612	0.016652
5145	-0.037815	-0.014982	0.61581	-0.010059	-0.034654	-0.061202	0.0045537	-0.028852	0.078668	0.012267	-0.026995	0.0056456	-0.0031602	0.048345	-0.025951	-0.034237	-0.012345	-0.012345	0.1035	-0.011587	-0.010012	0.048411	0.022913	-0.0090066	-0.0034203	0.036899	0.0079629	-0.053111	-0.011016	0.024302	-0.033073	0.0087994	-0.032417	-0.094085	-0.04935	0.010306	-0.06903	-0.050288	-0.0092924	-0.018476	-0.0070769	0.0052514	0.070174	0.042561	0.00038202	0.02394	-0.023617	-0.025162	-0.029973
5158	-0.037815	-0.014982	0.61581	-0.010059	-0.034654	-0.061202	0.0045537	-0.028852	0.078668	0.012267	-0.026995	0.0056456	-0.0031602	0.048345	-0.025951	-0.034237	-0.012345	-0.012345	0.1035	-0.011587	-0.010012	0.048411	0.022913	-0.0090066	-0.0034203	0.036899	0.0079629	-0.053111	-0.011016	0.024302	-0.033073	0.0087994	-0.032417	-0.094085	-0.04935	0.010306	-0.06903	-0.050288	-0.0092924	-0.018476	-0.0070769	0.0052514	0.070174	0.042561	0.00038202	0.02394	-0.023617	-0.025162	-0.029973
5148	-0.018373	-0.02143	0.6529	-0.0225	-0.025181	-0.054636	-0.015651	-0.023337	0.024492	0.00098697	-0.025038	0.0039451	-0.00040753	0.037812	-0.042722	-0.014056	-0.011832	-0.011832	0.12742	-0.0014262	-0.026801	0.029126	-0.018649	-0.023982	-0.0063774	0.046871	0.012061	-0.046963	0.0025631	0.019367	-0.037793	0.0023022	-0.017118	-0.093264	-0.049551	-0.021739	-0.048258	-0.030019	-0.013122	-0.021301	-0.0075992	0.035007	0.037482	0.015812	0.049259	0.038544	-0.033723	-0.011964	-0.017606
5155	-0.023255	-0.015013	0.57079	-0.0065466	-0.022559	-0.038732	-0.019583	0.0026655	0.023536	0.0053777	-0.022965	0.0036815	-0.0082555	0.048741	-0.041799	-0.0089259	-0.01667	-0.01667	0.10417	0.0027265	-0.023029	0.018946	-0.027561	-0.021297	-0.0047899	0.037743	0.013749	-0.04116	0.016983	0.015875	-0.023048	0.017619	0.0031495	-0.077581	-0.04597	-0.02573	-0.033468	-0.019781	-0.0027776	-0.013728	0.0016044	0.043496	0.034887	-0.000224	0.048946	0.066056	-0.035085	-0.013746	0.009986
5156	-0.018537	-0.0051195	0.52025	-0.0090935	-0.016354	-0.041144	-0.017078	0.0099843	0.026812	0.010909	-0.020396	0.0026214	-0.009991	0.051543	-0.04921	-0.014626	-0.013914	-0.013914	0.099732	0.022878	-0.018966	0.023725	-0.026969	-0.030725	0.0030155	0.038688	0.012942	-0.03917	0.0032119	0.0083051	-0.019858	0.013832	0.0063784	-0.080726	-0.040965	-0.03317	-0.022942	-0.011546	-0.0064421	0.0019866	-0.0028582	0.043125	0.050276	0.014358	0.05084	0.067824	-0.036022	-0.01002	0.0050891
5163	-0.01981	0.0075495	0.61811	-0.025285	-0.0041446	-0.05284	-0.024445	-0.0020253	0.01369	0.015563	-0.019696	-0.01813	0.014995	0.041418	-0.039942	-0.027442	-0.012162	-0.012162	0.11593	0.043801	-0.034174	0.041066	-0.031437	-0.029169	-0.0096207	0.018638	-0.0018144	-0.06722	-0.021017	-0.0028947	-0.023217	0.023781	0.0020256	-0.097252	-0.049032	-0.03503	-0.028455	-0.017324	-0.025172	0.012094	-0.0025687	0.031021	0.042954	3.86e-06	0.01913	0.05491	-0.041791	-0.036386	0.020238
5164	-0.030556	-0.0074067	0.66676	-0.02329	-0.014158	-0.053226	-0.017978	-0.009193	0.020838	0.011349	-0.024618	-0.010501	0.012251	0.048491	-0.034646	-0.019024	-0.0088711	-0.0088711	0.1144	0.0084652	-0.028302	0.039332	-0.025513	-0.023972	-0.0067298	0.027389	0.0046109	-0.054274	-0.0051478	0.007011	-0.020974	0.020069	-0.0027139	-0.092009	-0.052701	-0.033865	-0.040117	-0.027606	-0.013487	-0.0097154	0.0058747	0.032201	0.031502	0.0022174	0.020012	0.054878	-0.038225	-0.030776	0.0050339
5174	-0.023156	-0.019552	0.58536	-0.0091929	-0.033777	-0.048689	-0.01837	-0.022664	0.028441	0.00012324	-0.034482	-0.0015061	-0.015042	0.031673	-0.046613	-0.0040764	-0.019618	-0.019618	0.11838	-0.0077547	-0.029606	0.019359	-0.028741	-0.018234	-0.0058092	0.042633	0.020152	-0.050676	0.016175	0.026718	-0.039605	0.0018283	-0.010495	-0.098172	-0.057566	-0.027573	-0.054112	-0.030843	-0.013539	-0.028213	-0.0074	0.033859	0.025353	0.0015741	0.059927	0.046978	-0.036284	-0.017228	0.00055863
27043	-0.019405	-0.010845	0.54792	-0.0096536	-0.017208	-0.035423	-0.014989	0.0094341	0.022485	0.0044099	-0.015684	0.012938	-0.005935	0.047664	-0.040083	-0.014119	-0.017985	-0.017985	0.10119	0.0070698	-0.01649	0.019852	-0.020493	-0.025976	0.00096683	0.041476	0.01408	-0.036427	0.027269	0.012248	-0.017782	0.016801	0.001208	-0.077735	-0.038505	-0.025825	-0.023983	-0.012156	-0.012331	-0.0094222	-0.0043174	0.041588	0.048644	0.0036739	0.036929	0.059356	-0.034133	-0.02353	-0.014077
5187	-0.026014	-0.0272	0.66302	-0.01588	-0.025652	-0.04721	-0.015817	-0.023621	0.030573	0.0051	-0.02955	0.0041131	-0.0026207	0.046018	-0.042968	-0.0097289	-0.013914	-0.013914	0.1297	-0.0085847	-0.01949	0.026166	-0.021689	-0.021843	-0.0029135	0.048111	0.018306	-0.040798	0.0022856	0.02061	-0.034085	-0.00048026	-0.0097679	-0.088721	-0.046277	-0.020016	-0.047123	-0.031499	0.00042713	-0.026503	-0.004902	0.033613	0.037636	0.015541	0.047534	0.065756	-0.035948	-0.0047853	-0.012686
9451	-0.021599	-0.013932	0.57332	-0.0068847	-0.020574	-0.039319	-0.022977	0.0038922	0.025114	0.0081355	-0.024468	-0.0014586	-0.0045513	0.051579	-0.042326	-0.0072467	-0.016204	-0.016204	0.10443	0.0084273	-0.02481	0.021316	-0.031768	-0.018707	-0.0062482	0.036426	0.01538	-0.04431	0.011643	0.015772	-0.022785	0.019036	0.0078273	-0.076543	-0.048469	-0.025677	-0.032633	-0.020458	-0.0011596	-0.013086	0.0078605	0.044293	0.029131	-0.0033379	0.045772	0.077976	-0.035387	-0.013985	0.017934
5216	-0.021472	-0.015357	0.57886	-0.0069847	-0.02618	-0.037575	-0.018531	-0.00018545	0.026796	0.0029917	-0.025749	0.0040931	-0.011699	0.04866	-0.040154	-0.0068468	-0.01552	-0.01552	0.10248	-0.0037267	-0.021534	0.018369	-0.024488	-0.023204	-0.0046262	0.039021	0.014821	-0.039713	0.025402	0.018872	-0.023833	0.011376	0.0025689	-0.078411	-0.048914	-0.028349	-0.03652	-0.021391	-0.0083242	-0.020802	0.0010587	0.039375	0.031712	-0.00084764	0.045084	0.061543	-0.035793	-0.018581	-0.0041175
10891	-0.021868	-0.024227	0.5858	-0.0050875	-0.022083	-0.030545	-0.020669	0.0018766	0.030072	0.0061165	-0.022232	0.0071643	-0.0057478	0.053853	-0.040972	-0.0030874	-0.0149	-0.0149	0.10682	-0.0032447	-0.018159	0.017342	-0.027133	-0.01982	-0.0045025	0.042518	0.019717	-0.032511	0.022336	0.019845	-0.023494	0.010248	0.0037558	-0.070706	-0.043912	-0.019805	-0.0327	-0.020521	0.0052291	-0.022076	0.0064921	0.046	0.032019	0.002867	0.04976	0.079779	-0.035568	-0.0063914	0.0019494
5290	-0.022736	-0.017641	0.58846	-0.0067562	-0.023563	-0.039539	-0.023337	0.00041064	0.026191	0.0076433	-0.025444	-0.00075885	-0.0067403	0.052611	-0.043607	-0.0065797	-0.015673	-0.015673	0.10629	0.0014218	-0.024014	0.019304	-0.031681	-0.018428	-0.0064856	0.037886	0.01638	-0.042238	0.010149	0.017598	-0.02422	0.016438	0.0055333	-0.075129	-0.049328	-0.02407	-0.036596	-0.02352	0.0032315	-0.017951	0.0097728	0.044535	0.027731	-0.0024016	0.046415	0.078179	-0.033661	-0.01061	0.013418
5294	-0.023854	-0.013273	0.62053	-0.01023	-0.017982	-0.040939	-0.021556	0.0015175	0.023092	0.011101	-0.024202	-0.0059386	-0.00038691	0.05364	-0.040937	-0.011717	-0.013809	-0.013809	0.10573	0.0049604	-0.026534	0.0252	-0.031636	-0.022906	-0.0092235	0.031793	0.010624	-0.046201	0.0021815	0.01344	-0.021534	0.018693	0.0092028	-0.075996	-0.049572	-0.026587	-0.0337	-0.022742	-0.0013725	-0.015844	0.011683	0.041687	0.028753	-0.0045647	0.036735	0.079973	-0.03557	-0.017886	0.0187
8394	-0.023227	-0.015521	0.57623	-0.0063579	-0.024127	-0.038345	-0.020597	0.0020409	0.026108	0.0064964	-0.025057	0.0019417	-0.0075949	0.050479	-0.041237	-0.0071411	-0.016515	-0.016515	0.10484	0.0014622	-0.022253	0.018692	-0.029399	-0.020229	-0.0044051	0.038264	0.016088	-0.040904	0.018155	0.017405	-0.02287	0.015529	0.0050129	-0.076575	-0.048255	-0.02742	-0.034683	-0.021269	-0.0024041	-0.017405	0.0046513	0.042793	0.031146	-0.001287	0.045628	0.071118	-0.034654	-0.014055	0.0079711
27124	0	0	0	0	0	0	0	0	0	0	0	0	0	0	0	0	0	0	0	0	0	0	0	0	0	0	0	0	0	0	0	0	0	0	0	0	0	0	0	0	0	0	0	0	0	0	0	0	0
3632	-0.028699	-0.018798	0.57626	-0.0027508	-0.031129	-0.044286	-0.010945	-0.0063487	0.046724	0.0063128	-0.031382	0.0026281	-0.012477	0.052674	-0.03659	-0.012257	-0.018352	-0.018352	0.10186	-0.0092292	-0.017826	0.020686	-0.016245	-0.013039	-0.0049241	0.041779	0.016233	-0.039382	0.015566	0.023214	-0.02818	0.012104	-0.0035692	-0.078356	-0.050529	-0.015674	-0.048524	-0.033277	-0.001276	-0.022957	0.00027462	0.028806	0.035424	0.00859	0.037145	0.064776	-0.029013	-0.013532	-0.0025233
8544	-0.026769	-0.022436	0.65323	-0.010369	-0.024989	-0.028619	-0.02244	-0.0026881	0.02541	0.0078893	-0.024356	0.0014106	-0.0042412	0.053919	-0.039523	-0.0059704	-0.012887	-0.012887	0.10704	-0.0090037	-0.0211	0.019622	-0.026657	-0.021422	-0.0061517	0.037756	0.01426	-0.041503	0.011897	0.018807	-0.029044	0.008396	0.0031703	-0.075904	-0.04774	-0.023169	-0.04051	-0.0258	0.0043106	-0.028572	0.0035473	0.040456	0.024781	0.00016498	0.043995	0.07231	-0.037872	-0.0097138	-0.0016402
5567	-0.022379	-0.016583	0.5739	-0.0070657	-0.022972	-0.035909	-0.022025	0.0031635	0.026288	0.0063585	-0.024636	0.0020366	-0.005726	0.052221	-0.04031	-0.0058016	-0.016505	-0.016505	0.10336	0.0021211	-0.022717	0.021279	-0.0285	-0.01603	-0.0045533	0.03861	0.016617	-0.042569	0.018277	0.01783	-0.024532	0.019125	0.0029426	-0.076869	-0.0491	-0.024843	-0.035908	-0.021533	0.00065147	-0.015066	0.005005	0.042036	0.025978	-0.0020056	0.045905	0.073815	-0.036002	-0.011826	0.011053
50818	0	0	0	0	0	0	0	0	0	0	0	0	0	0	0	0	0	0	0	0	0	0	0	0	0	0	0	0	0	0	0	0	0	0	0	0	0	0	0	0	0	0	0	0	0	0	0	0	0
5578	-0.021828	-0.014558	0.57184	-0.0061651	-0.021299	-0.039025	-0.023352	0.0037862	0.025517	0.0089278	-0.024461	-0.0010926	-0.0040754	0.051492	-0.041946	-0.0069649	-0.016692	-0.016692	0.10603	0.0081949	-0.024192	0.021123	-0.031834	-0.017501	-0.0054659	0.036613	0.016472	-0.043526	0.011986	0.015619	-0.022675	0.019557	0.0062769	-0.076073	-0.048004	-0.025138	-0.032665	-0.020609	0.00022215	-0.01337	0.0079786	0.044706	0.029262	-0.0027852	0.046023	0.079045	-0.035249	-0.012801	0.018971
5581	-0.019808	-0.012606	0.5494	-0.012168	-0.025911	-0.04292	-0.016694	-0.0035158	0.028756	0.0059961	-0.026471	0.0061648	-0.0085528	0.050678	-0.045326	-0.0098321	-0.013016	-0.013016	0.11483	0.0089374	-0.019977	0.023075	-0.019373	-0.023274	0.0042709	0.042999	0.01851	-0.037977	0.0086231	0.014678	-0.025504	0.012469	-0.0036777	-0.083712	-0.045021	-0.030648	-0.034497	-0.019098	-0.0025534	-0.007052	-0.005428	0.041324	0.043363	0.018214	0.061341	0.059167	-0.034345	-0.0041089	-0.00095106
5313	0	0	0	0	0	0	0	0	0	0	0	0	0	0	0	0	0	0	0	0	0	0	0	0	0	0	0	0	0	0	0	0	0	0	0	0	0	0	0	0	0	0	0	0	0	0	0	0	0
5585	-0.022747	-0.017999	0.57056	-0.0066739	-0.022285	-0.036594	-0.022669	0.0033048	0.027375	0.0086136	-0.022934	0.0024533	-0.0040379	0.05153	-0.040715	-0.0058449	-0.016675	-0.016675	0.10406	0.0045733	-0.021451	0.019865	-0.0302	-0.018597	-0.004866	0.039454	0.018759	-0.040131	0.016133	0.017435	-0.021471	0.018978	0.0041823	-0.07524	-0.046413	-0.02273	-0.033187	-0.021173	0.0035335	-0.014538	0.0066825	0.046441	0.03067	-0.00089725	0.047626	0.07806	-0.034623	-0.011488	0.017943
5610	-0.021282	-0.016352	0.57866	-0.0057387	-0.022535	-0.039634	-0.022726	0.0019408	0.026549	0.0076379	-0.025001	-0.00058165	-0.004509	0.052097	-0.042015	-0.005064	-0.015629	-0.015629	0.10692	0.0047334	-0.024754	0.020872	-0.030701	-0.017352	-0.0064848	0.03744	0.016926	-0.042426	0.011732	0.017847	-0.024759	0.018196	0.005301	-0.075584	-0.048892	-0.023287	-0.034964	-0.022	0.0016666	-0.015415	0.0083659	0.045114	0.02662	-0.0021279	0.050209	0.078357	-0.034789	-0.0095337	0.018272
5319	-0.032777	-0.021125	0.58545	-0.0058935	-0.031161	-0.043795	-0.0060525	-0.012385	0.056065	0.0083394	-0.034752	0.0040097	-0.01143	0.050349	-0.033786	-0.016519	-0.019342	-0.019342	0.10735	-0.0093732	-0.010665	0.025444	-0.0097814	-0.0057034	-0.0036652	0.046124	0.017618	-0.04024	0.0062868	0.025492	-0.030521	0.0094515	-0.0094612	-0.081977	-0.046437	-0.0033289	-0.053574	-0.035826	0.0050373	-0.021244	-0.0022742	0.021653	0.036102	0.018713	0.037371	0.057863	-0.028722	-0.0059127	-0.00093939
3936	-0.022653	-0.014584	0.58335	-0.010186	-0.028602	-0.032238	-0.021967	-0.00090648	0.025925	0.0026557	-0.027266	0.0030594	-0.013178	0.055954	-0.042172	-0.0083919	-0.016668	-0.016668	0.10315	-0.0035456	-0.021668	0.018532	-0.025044	-0.020502	-0.0052233	0.037975	0.012127	-0.046073	0.020417	0.017831	-0.026669	0.011765	0.0028126	-0.07975	-0.049253	-0.025313	-0.038537	-0.021058	-0.0061236	-0.02204	0.0014853	0.037276	0.025714	-0.0028262	0.04238	0.061481	-0.038761	-0.017559	-0.0040567
23236	-0.037163	-0.021904	0.51438	0.0036163	-0.035738	-0.050413	0.0064808	-0.01372	0.084674	0.013086	-0.043332	0.0057509	-0.011874	0.042527	-0.021451	-0.024713	-0.023844	-0.023844	0.10527	-0.011469	-0.004497	0.025714	0.0051806	0.0089417	-0.0023088	0.046094	0.021449	-0.043237	0.0098508	0.026741	-0.026602	0.014014	-0.017212	-0.079555	-0.044373	0.0097478	-0.062888	-0.047208	0.0067065	-0.015704	-0.0070413	0.0075423	0.040504	0.033211	0.0376	0.045383	-0.01505	0.0062348	0.00013017
5333	-0.019146	-0.010728	0.54676	-0.0095615	-0.016935	-0.035129	-0.015078	0.010164	0.022306	0.0043933	-0.01527	0.013192	-0.0056658	0.04785	-0.040008	-0.014033	-0.017954	-0.017954	0.10056	0.0071894	-0.016389	0.019687	-0.02061	-0.026266	0.00089183	0.041521	0.014037	-0.035995	0.027523	0.01208	-0.017529	0.016899	0.0015878	-0.077122	-0.038213	-0.025833	-0.023306	-0.011771	-0.012223	-0.0092003	-0.0041449	0.041905	0.048672	0.0034568	0.036729	0.059833	-0.034118	-0.023552	-0.014117
5334	-0.039081	-0.011432	0.49385	-0.005643	-0.037157	-0.05674	0.020906	-0.025814	0.11807	0.014261	-0.03462	0.01084	-0.006359	0.042644	-0.0096802	-0.048411	-0.014833	-0.014833	0.091595	-0.0095095	0.017139	0.049326	0.04824	0.01295	0.0043097	0.046422	0.022252	-0.046735	-0.018631	0.027181	-0.019978	0.0079776	-0.039775	-0.089952	-0.02984	0.029829	-0.071871	-0.055656	0.0024083	-0.0067694	-0.010959	-0.010701	0.078124	0.076569	-0.0074957	0.0069683	-0.0069999	-0.013601	-0.025907
5335	-0.030943	-0.014801	0.49731	-0.00019014	-0.03189	-0.048662	0.0040749	-0.0077521	0.081441	0.015569	-0.04087	0.0030613	-0.011701	0.044635	-0.02783	-0.022159	-0.020219	-0.020219	0.096947	0.0036367	-0.006698	0.030028	0.00073431	-9.76e-05	6.86e-05	0.046329	0.023725	-0.043853	0.0050568	0.023226	-0.026815	0.013848	-0.011378	-0.082184	-0.043524	-3.21e-05	-0.054457	-0.039623	0.0033669	-0.0062877	-0.0050575	0.013259	0.04309	0.036	0.039733	0.053362	-0.018402	5.43e-05	0.011963
5337	0	0	0	0	0	0	0	0	0	0	0	0	0	0	0	0	0	0	0	0	0	0	0	0	0	0	0	0	0	0	0	0	0	0	0	0	0	0	0	0	0	0	0	0	0	0	0	0	0
5340	-0.025423	-0.017209	0.58392	-0.0048045	-0.026479	-0.038326	-0.015457	-0.0021956	0.02887	0.0037793	-0.024891	0.0083339	-0.011254	0.051472	-0.040852	-0.0082867	-0.015932	-0.015932	0.10354	-0.0050767	-0.02098	0.017868	-0.023843	-0.020978	-0.0041669	0.040879	0.014156	-0.039168	0.020766	0.021358	-0.025431	0.015804	-0.0015204	-0.078985	-0.045978	-0.02142	-0.037716	-0.022332	-0.0051417	-0.019801	0.00039672	0.038858	0.034229	0.0017105	0.044178	0.062906	-0.03563	-0.016504	-0.004153
5347	-0.022391	-0.013962	0.5676	-0.0067649	-0.021878	-0.03816	-0.021594	0.004076	0.025378	0.0080635	-0.023777	0.0014126	-0.0054442	0.050524	-0.041023	-0.0076041	-0.016533	-0.016533	0.10344	0.0060726	-0.022791	0.020292	-0.030063	-0.01993	-0.0048625	0.037532	0.016177	-0.042547	0.015784	0.016111	-0.021638	0.018779	0.005292	-0.076978	-0.047086	-0.026179	-0.032379	-0.019857	-0.0014239	-0.012993	0.0056776	0.043931	0.031282	-0.001796	0.045732	0.074225	-0.03526	-0.014221	0.014551
1263	-0.022663	-0.013523	0.5712	-0.0067934	-0.022184	-0.038279	-0.020396	0.0031592	0.025568	0.0062388	-0.024833	0.00062842	-0.0063735	0.050601	-0.040956	-0.0074948	-0.01617	-0.01617	0.10416	0.0042426	-0.023637	0.020353	-0.029104	-0.020568	-0.0050122	0.036779	0.015484	-0.042439	0.018238	0.016161	-0.022123	0.016528	0.0059162	-0.077797	-0.048714	-0.028521	-0.033091	-0.020003	-0.0053788	-0.015713	0.0048723	0.042391	0.030629	-0.0023521	0.045149	0.070366	-0.035632	-0.016379	0.010246
84172	0	0	0	0	0	0	0	0	0	0	0	0	0	0	0	0	0	0	0	0	0	0	0	0	0	0	0	0	0	0	0	0	0	0	0	0	0	0	0	0	0	0	0	0	0	0	0	0	0
23647	-0.023413	-0.017896	0.57939	-0.0051956	-0.025932	-0.038072	-0.01905	0.0016263	0.028151	0.0049063	-0.024273	0.0051204	-0.0097895	0.049853	-0.039896	-0.0053862	-0.01607	-0.01607	0.10227	-0.0035394	-0.020233	0.01778	-0.025555	-0.020083	-0.0041836	0.040231	0.017135	-0.037433	0.024175	0.019948	-0.023881	0.013672	0.001568	-0.075437	-0.048172	-0.025599	-0.036637	-0.022164	-0.0019524	-0.02061	0.0033949	0.041391	0.031111	0.00089223	0.045911	0.067265	-0.034292	-0.012904	-0.0005327
5464	-0.036239	-0.024521	0.7066	-0.019145	-0.025932	-0.058966	-0.010517	-0.030173	0.031682	0.0094689	-0.012383	0.0020405	0.0093779	0.066062	-0.035305	-0.021302	-0.012236	-0.012236	0.1188	-0.016493	-0.018405	0.035078	-0.015328	-0.026594	-0.0051269	0.044979	0.0056256	-0.051057	-0.01035	0.018333	-0.035706	0.011077	-0.023451	-0.096717	-0.044215	-0.010442	-0.05555	-0.036697	-0.0068523	-0.019252	-0.014486	0.045372	0.049985	0.015202	0.013672	0.054744	-0.035491	-0.030297	-0.026128
5524	-0.02482	-0.02117	0.57685	-0.0040204	-0.026097	-0.04005	-0.014731	7.5e-05	0.027091	0.0054802	-0.02235	0.0052677	-0.0065257	0.052052	-0.040199	-0.0073344	-0.017506	-0.017506	0.1029	-0.0047464	-0.020975	0.017667	-0.024525	-0.015776	-0.004244	0.040721	0.014795	-0.036955	0.018207	0.019796	-0.025663	0.01704	-0.0017988	-0.075344	-0.046671	-0.020619	-0.038974	-0.023773	0.0017512	-0.016188	0.00046604	0.043685	0.032036	0.0020388	0.047261	0.070891	-0.032914	-0.0097338	-0.0011217
5495	-0.026827	-0.019008	0.58024	-0.0031939	-0.030154	-0.042797	-0.01318	-0.0050509	0.043112	0.0060872	-0.029803	0.0030157	-0.011481	0.050265	-0.03772	-0.0098684	-0.017305	-0.017305	0.10313	-0.0075335	-0.018442	0.02031	-0.01824	-0.014371	-0.0049003	0.041475	0.017318	-0.03959	0.017543	0.022937	-0.027684	0.011898	-0.002102	-0.078057	-0.0505	-0.018259	-0.046286	-0.030843	-0.0010474	-0.022987	0.0016027	0.032815	0.033398	0.0071123	0.041823	0.065451	-0.030509	-0.011874	-0.00055907
8125	-0.019405	-0.010845	0.54792	-0.0096536	-0.017208	-0.035423	-0.014989	0.0094341	0.022485	0.0044099	-0.015684	0.012938	-0.005935	0.047664	-0.040083	-0.014119	-0.017985	-0.017985	0.10119	0.0070698	-0.01649	0.019852	-0.020493	-0.025976	0.00096683	0.041476	0.01408	-0.036427	0.027269	0.012248	-0.017782	0.016801	0.001208	-0.077735	-0.038505	-0.025825	-0.023983	-0.012156	-0.012331	-0.0094222	-0.0043174	0.041588	0.048644	0.0036739	0.036929	0.059356	-0.034133	-0.02353	-0.014077
5465	-0.01793	-0.018369	0.52932	-0.0081408	-0.022183	-0.03414	-0.015623	0.0047873	0.035326	0.0055801	-0.022162	0.014741	-0.0066179	0.058233	-0.046264	-0.0054343	-0.012583	-0.012583	0.11498	0.0089841	-0.0087413	0.019487	-0.020394	-0.022556	0.0087948	0.048974	0.024317	-0.023866	0.015635	0.015291	-0.020912	0.0054209	-0.00056953	-0.071681	-0.036162	-0.02319	-0.025966	-0.014186	0.006557	-0.0098587	0.00071975	0.045376	0.048403	0.023333	0.057649	0.074688	-0.034182	0.0052924	-0.011195
5467	-0.021914	-0.019237	0.56887	-0.013452	-0.020936	-0.035408	-0.013477	-0.0016227	0.034614	0.0046033	-0.022977	0.015555	-0.0021034	0.05828	-0.044646	-0.0088953	-0.010969	-0.010969	0.12818	0.006507	-0.0060024	0.024491	-0.017657	-0.023561	0.0091902	0.048296	0.021933	-0.025231	0.010984	0.012741	-0.021335	0.00045217	-0.0049611	-0.078181	-0.033579	-0.021958	-0.028501	-0.015537	0.0044313	-0.011678	-0.0018661	0.042744	0.052522	0.027407	0.051006	0.066584	-0.037253	0.0051189	-0.019698
5468	-0.018241	-0.01889	0.53305	-0.0070086	-0.021837	-0.031228	-0.015907	0.0083014	0.033007	0.0073522	-0.021264	0.015504	-0.0056563	0.060464	-0.04515	-0.0053347	-0.013229	-0.013229	0.1158	0.0090288	-0.0075501	0.017583	-0.020687	-0.023111	0.0099017	0.047922	0.024887	-0.023259	0.019041	0.014456	-0.018275	0.008834	0.0012554	-0.067749	-0.034277	-0.022732	-0.022987	-0.012675	0.0089949	-0.008625	0.0018163	0.045772	0.048297	0.021995	0.055111	0.08078	-0.033712	0.0053273	-0.010173
8550	-0.022081	-0.014055	0.57288	-0.0064059	-0.021688	-0.038521	-0.021428	0.0034397	0.025847	0.0072754	-0.024549	5.37e-05	-0.005507	0.051462	-0.041437	-0.006851	-0.016082	-0.016082	0.10458	0.0053876	-0.023855	0.020835	-0.029909	-0.01933	-0.0053797	0.036885	0.015958	-0.042769	0.015264	0.016459	-0.022864	0.017661	0.005783	-0.076931	-0.048304	-0.026352	-0.033153	-0.020308	-0.0027039	-0.01477	0.0061651	0.0435	0.029831	-0.0024102	0.046187	0.074369	-0.035447	-0.01452	0.013844
5551	-0.019066	-0.020985	0.53637	-0.0068224	-0.041734	-0.048945	-0.021495	-0.034818	0.030256	-0.0032358	-0.040265	-0.0015737	-0.025429	0.02118	-0.053952	0.000814	-0.023081	-0.023081	0.12152	-0.0060804	-0.034845	0.016203	-0.034143	-0.011662	-0.0093993	0.046139	0.026404	-0.056684	0.020898	0.036035	-0.050328	-0.0017978	-0.014918	-0.10652	-0.064097	-0.024182	-0.065734	-0.034147	-0.015106	-0.030665	-0.0076756	0.032265	0.01347	-0.0045736	0.072239	0.042986	-0.036797	-0.012072	0.012911
5663	-0.023924	-0.024902	0.54309	-0.0026478	-0.047275	-0.062518	-0.014905	-0.05711	0.03287	-0.0060887	-0.046442	0.0017071	-0.030981	0.010187	-0.054941	-0.0023411	-0.023463	-0.023463	0.12819	-0.011827	-0.042124	0.016823	-0.028522	-0.0087315	-0.012737	0.048228	0.025537	-0.060431	0.036968	0.04793	-0.059847	0.001356	-0.028086	-0.11977	-0.069371	-0.014828	-0.079975	-0.041651	-0.024521	-0.033677	-0.01663	0.022019	0.012502	-0.0077271	0.06869	0.026925	-0.031938	-0.023155	0.013588
5726	0	0	0	0	0	0	0	0	0	0	0	0	0	0	0	0	0	0	0	0	0	0	0	0	0	0	0	0	0	0	0	0	0	0	0	0	0	0	0	0	0	0	0	0	0	0	0	0	0
5728	-0.028211	-0.022324	0.58313	-0.0015771	-0.031633	-0.044201	-0.01234	-0.0075657	0.050276	0.0089871	-0.03063	0.0041984	-0.011346	0.05222	-0.036807	-0.0095515	-0.017819	-0.017819	0.10259	-0.009624	-0.01633	0.021491	-0.014796	-0.0096865	-0.0050293	0.043884	0.019153	-0.040075	0.011307	0.025993	-0.030463	0.014662	-0.0077264	-0.077522	-0.049262	-0.0083263	-0.051077	-0.035272	0.0073293	-0.022936	0.0025068	0.030297	0.033535	0.01178	0.041813	0.070776	-0.028427	-0.0073455	0.002957
2185	-0.020781	-0.012158	0.57493	-0.0052619	-0.020746	-0.039161	-0.023017	0.0047598	0.025671	0.0083967	-0.02491	-0.0016481	-0.0062549	0.051455	-0.042783	-0.0066926	-0.016367	-0.016367	0.10462	0.0090518	-0.024321	0.021153	-0.032073	-0.020161	-0.0063682	0.036088	0.014701	-0.04382	0.01208	0.015664	-0.024007	0.018421	0.0073281	-0.076162	-0.04782	-0.025225	-0.031942	-0.019318	-0.0014861	-0.012148	0.0073743	0.044428	0.03051	-0.0026854	0.047152	0.078307	-0.036332	-0.012393	0.02105
5787	-0.022139	-0.013825	0.54071	-0.005932	-0.027481	-0.041966	-0.01314	-0.00077169	0.040059	0.0065081	-0.026122	0.0064701	-0.01391	0.050759	-0.043969	-0.008188	-0.012985	-0.012985	0.10266	0.0023314	-0.016274	0.020229	-0.019289	-0.022498	0.0015094	0.044565	0.018799	-0.034787	0.013709	0.019243	-0.026294	0.0069603	-0.00234	-0.080061	-0.047246	-0.028308	-0.038335	-0.022739	-0.0038705	-0.014173	-0.0025271	0.037017	0.041209	0.015437	0.052921	0.062201	-0.032813	-0.0067567	-0.0081295
5829	-0.023561	-0.016089	0.57889	-0.0064467	-0.025512	-0.037438	-0.017995	0.0011555	0.026938	0.0039153	-0.025127	0.0048201	-0.010829	0.049273	-0.040419	-0.0069479	-0.016207	-0.016207	0.10298	-0.0034981	-0.020689	0.016906	-0.025863	-0.022429	-0.0036892	0.039999	0.015735	-0.038577	0.025079	0.018796	-0.023598	0.011224	0.0029501	-0.076905	-0.048281	-0.028733	-0.035417	-0.021316	-0.0062785	-0.021339	0.0015952	0.039731	0.032826	-4.49e-05	0.04533	0.06352	-0.035242	-0.016148	-0.0035202
5810	-0.025638	-0.022086	0.58424	-0.0033344	-0.027212	-0.038052	-0.015566	-0.0030268	0.038319	0.0059779	-0.027082	0.0053205	-0.010331	0.054453	-0.039896	-0.007522	-0.016942	-0.016942	0.10652	-0.0064482	-0.017488	0.018507	-0.022845	-0.016163	-0.0041394	0.042821	0.017856	-0.035664	0.018345	0.022381	-0.026604	0.011377	0.00066796	-0.073892	-0.047814	-0.017049	-0.04153	-0.027125	0.0029826	-0.021388	0.0037756	0.038552	0.03402	0.005615	0.043642	0.079816	-0.03243	-0.0080347	-0.00053322
5884	-0.019405	-0.010845	0.54792	-0.0096536	-0.017208	-0.035423	-0.014989	0.0094341	0.022485	0.0044099	-0.015684	0.012938	-0.005935	0.047664	-0.040083	-0.014119	-0.017985	-0.017985	0.10119	0.0070698	-0.01649	0.019852	-0.020493	-0.025976	0.00096683	0.041476	0.01408	-0.036427	0.027269	0.012248	-0.017782	0.016801	0.001208	-0.077735	-0.038505	-0.025825	-0.023983	-0.012156	-0.012331	-0.0094222	-0.0043174	0.041588	0.048644	0.0036739	0.036929	0.059356	-0.034133	-0.02353	-0.014077
10111	-0.025563	-0.02487	0.58553	-0.0024613	-0.026908	-0.035943	-0.015665	-0.0028551	0.039548	0.0073851	-0.025096	0.006642	-0.0085701	0.056399	-0.039627	-0.0057578	-0.016993	-0.016993	0.10639	-0.0073939	-0.015954	0.018758	-0.022944	-0.013799	-0.0043849	0.04511	0.019627	-0.034954	0.016766	0.023655	-0.027278	0.013239	-0.0010741	-0.072412	-0.045886	-0.012071	-0.041426	-0.027629	0.0078674	-0.019723	0.0044604	0.041982	0.032924	0.0065173	0.044178	0.087597	-0.032247	-0.0050743	0.0022246
5888	-0.02279	-0.021836	0.58074	-0.0052535	-0.024576	-0.035202	-0.019066	0.002649	0.028232	0.0053985	-0.021349	0.0064936	-0.0054884	0.053518	-0.040614	-0.0039684	-0.015945	-0.015945	0.10468	-0.0016231	-0.018452	0.017957	-0.027485	-0.017788	-0.0032501	0.04312	0.018833	-0.035914	0.023737	0.020236	-0.023672	0.015563	0.0016112	-0.073552	-0.045804	-0.022166	-0.035158	-0.021914	0.0026727	-0.016558	0.0043949	0.047125	0.030674	0.0015996	0.046087	0.077317	-0.034632	-0.0088182	0.00035327
5883	-0.02634	-0.017812	0.57093	-0.0043513	-0.027572	-0.040228	-0.015026	-0.0012077	0.035375	0.0076262	-0.026513	0.0062823	-0.011031	0.050175	-0.038804	-0.0099399	-0.018639	-0.018639	0.10355	-0.0042541	-0.016842	0.018101	-0.022222	-0.0174	-0.0023237	0.042345	0.017028	-0.037844	0.019917	0.020681	-0.025167	0.014122	-0.0010796	-0.077177	-0.04692	-0.019677	-0.040121	-0.025838	-0.00087334	-0.018178	-0.00055694	0.036577	0.036998	0.0053347	0.04104	0.07238	-0.032152	-0.013446	-0.0024094
5894	-0.021534	-0.013595	0.574	-0.0064157	-0.020978	-0.039322	-0.02275	0.0036568	0.025558	0.0080066	-0.024905	-0.0019066	-0.0045591	0.052124	-0.042195	-0.0068952	-0.015965	-0.015965	0.10541	0.0076277	-0.024893	0.021623	-0.031707	-0.018747	-0.0061086	0.035669	0.015554	-0.043954	0.011895	0.015637	-0.022586	0.018759	0.0074588	-0.076426	-0.048772	-0.026169	-0.032743	-0.020355	-0.0014754	-0.01377	0.0085811	0.044478	0.028637	-0.0032744	0.046253	0.077639	-0.035535	-0.013698	0.018136
8738	-0.023578	-0.016357	0.57644	-0.0052071	-0.025298	-0.037062	-0.01811	0.0014165	0.026783	0.0047488	-0.024676	0.0052596	-0.010889	0.049087	-0.040551	-0.0071029	-0.016692	-0.016692	0.10326	-0.0032271	-0.020069	0.016813	-0.025895	-0.022131	-0.0034008	0.039902	0.015976	-0.03838	0.024324	0.018667	-0.023309	0.012067	0.0025814	-0.076629	-0.047258	-0.027769	-0.035098	-0.021052	-0.0052803	-0.020665	0.0013646	0.039948	0.0336	0.00030685	0.045201	0.065814	-0.035051	-0.015695	-0.0029478
5898	-0.023651	-0.017316	0.58112	-0.0052328	-0.026242	-0.037476	-0.0181	0.00041188	0.027478	0.004262	-0.025486	0.0041259	-0.010964	0.049937	-0.040349	-0.0057259	-0.015913	-0.015913	0.10318	-0.0044981	-0.020851	0.016734	-0.026131	-0.021929	-0.0044052	0.039589	0.016279	-0.037923	0.023891	0.019944	-0.024279	0.011189	0.0035863	-0.075656	-0.048785	-0.02778	-0.03663	-0.022175	-0.0043738	-0.022134	0.0029922	0.040522	0.030755	-0.00026642	0.046756	0.065738	-0.03491	-0.014117	-0.0014052
10928	-0.024332	-0.025628	0.59277	-0.0037359	-0.028295	-0.03751	-0.019844	-0.0042453	0.028987	0.00528	-0.024922	0.0048166	-0.0087361	0.053648	-0.04025	-0.0017068	-0.016727	-0.016727	0.1137	-0.010074	-0.020129	0.015828	-0.026013	-0.014346	-0.0048084	0.044046	0.019858	-0.035898	0.016314	0.02342	-0.026299	0.014382	-0.0026132	-0.072886	-0.046868	-0.016943	-0.041394	-0.026407	0.010321	-0.022152	0.0025977	0.046391	0.02658	0.0016695	0.062392	0.07599	-0.034544	0.0047093	0.0075929
5900	-0.022238	-0.025125	0.6494	-0.024595	-0.023002	-0.048117	-0.017087	-0.024173	0.020758	-0.0026662	-0.026834	0.0036664	-1.05e-05	0.038259	-0.04196	-0.014676	-0.011482	-0.011482	0.13791	-0.0020756	-0.024942	0.027875	-0.016448	-0.025111	-0.0040392	0.048472	0.013072	-0.041426	0.0046082	0.017647	-0.028509	-0.0013067	-0.015645	-0.090648	-0.048493	-0.024037	-0.04621	-0.028268	-0.0092896	-0.023885	-0.010883	0.035829	0.043425	0.014421	0.067058	0.035323	-0.035867	0.0028207	-0.018876
5901	-0.023229	-0.023169	0.59033	-0.005339	-0.02518	-0.037042	-0.01942	-0.00033298	0.031237	0.0055004	-0.022449	0.0049005	-0.0056318	0.054624	-0.039903	-0.0031625	-0.015302	-0.015302	0.10408	-0.0057013	-0.019965	0.019796	-0.025576	-0.017866	-0.0048986	0.042284	0.019337	-0.03516	0.019886	0.021556	-0.024978	0.013495	-0.00037851	-0.07442	-0.047144	-0.019507	-0.038548	-0.024378	0.0047357	-0.021274	0.0053187	0.046062	0.029223	0.0022209	0.047958	0.075712	-0.034314	-0.0087677	0.0033132
5902	-0.023879	-0.021825	0.60638	-0.0079856	-0.027791	-0.041743	-0.022035	-0.0074804	0.024503	0.0025688	-0.028658	0.0030827	-0.0099268	0.047242	-0.040328	-0.0059508	-0.016723	-0.016723	0.12629	-0.0082072	-0.022463	0.014795	-0.02725	-0.02139	-0.0050214	0.040583	0.016086	-0.03772	0.018657	0.019448	-0.024058	0.0069202	-0.0025067	-0.077348	-0.05148	-0.026858	-0.040565	-0.025039	8.59e-05	-0.026841	0.00018361	0.040593	0.029556	0.0030638	0.067096	0.060117	-0.03577	0.007898	-0.001073
5903	-0.023856	-0.017586	0.58077	-0.0053826	-0.026925	-0.037914	-0.018899	-4.69e-05	0.027954	0.0045352	-0.026016	0.0037368	-0.011414	0.049523	-0.040456	-0.0059414	-0.016426	-0.016426	0.10387	-0.0046345	-0.020456	0.016066	-0.026642	-0.021193	-0.0044304	0.039898	0.016479	-0.037896	0.023631	0.019732	-0.024136	0.011061	0.0034149	-0.075887	-0.048936	-0.027335	-0.037378	-0.022713	-0.0037309	-0.0228	0.0026748	0.040184	0.031026	0.00021698	0.046875	0.065587	-0.034758	-0.014067	-0.0008628
5905	-0.019405	-0.010845	0.54792	-0.0096536	-0.017208	-0.035423	-0.014989	0.0094341	0.022485	0.0044099	-0.015684	0.012938	-0.005935	0.047664	-0.040083	-0.014119	-0.017985	-0.017985	0.10119	0.0070698	-0.01649	0.019852	-0.020493	-0.025976	0.00096683	0.041476	0.01408	-0.036427	0.027269	0.012248	-0.017782	0.016801	0.001208	-0.077735	-0.038505	-0.025825	-0.023983	-0.012156	-0.012331	-0.0094222	-0.0043174	0.041588	0.048644	0.0036739	0.036929	0.059356	-0.034133	-0.02353	-0.014077
5906	-0.019405	-0.010845	0.54792	-0.0096536	-0.017208	-0.035423	-0.014989	0.0094341	0.022485	0.0044099	-0.015684	0.012938	-0.005935	0.047664	-0.040083	-0.014119	-0.017985	-0.017985	0.10119	0.0070698	-0.01649	0.019852	-0.020493	-0.025976	0.00096683	0.041476	0.01408	-0.036427	0.027269	0.012248	-0.017782	0.016801	0.001208	-0.077735	-0.038505	-0.025825	-0.023983	-0.012156	-0.012331	-0.0094222	-0.0043174	0.041588	0.048644	0.0036739	0.036929	0.059356	-0.034133	-0.02353	-0.014077
5908	-0.023488	-0.021666	0.58864	-0.0038235	-0.026996	-0.039489	-0.01888	3.57e-05	0.030657	0.0054558	-0.0229	0.0048725	-0.0069978	0.054213	-0.03941	-0.0028206	-0.015513	-0.015513	0.10264	-0.0058476	-0.020416	0.019943	-0.024936	-0.016797	-0.0049607	0.041894	0.018701	-0.036672	0.019875	0.022329	-0.026274	0.015908	-0.00093751	-0.074455	-0.048269	-0.020292	-0.040036	-0.024982	0.0045027	-0.020133	0.0056231	0.045018	0.027296	0.0017868	0.046593	0.074749	-0.033532	-0.008044	0.0033983
5914	-0.020612	-0.021328	0.55478	-0.0064702	-0.020459	-0.031893	-0.018666	0.0055942	0.029537	0.0064914	-0.021931	0.011429	-0.0060125	0.057431	-0.04333	-0.0060572	-0.015052	-0.015052	0.10855	0.004755	-0.013879	0.017099	-0.023122	-0.021248	0.003334	0.0451	0.020548	-0.027546	0.021724	0.015081	-0.019838	0.0098212	0.0043632	-0.070101	-0.03947	-0.023457	-0.027155	-0.015489	0.0056273	-0.014654	0.0016616	0.044724	0.042012	0.012975	0.052669	0.079877	-0.034241	-0.0030857	-0.0062534
5879	-0.024087	-0.01946	0.58067	-0.00474	-0.026593	-0.038759	-0.018512	0.00079806	0.02843	0.0060947	-0.023275	0.0054395	-0.0079041	0.051902	-0.039678	-0.0054471	-0.017119	-0.017119	0.10453	-0.004085	-0.019719	0.018276	-0.025752	-0.018349	-0.0031058	0.041775	0.017711	-0.037525	0.021278	0.020087	-0.024854	0.014998	-0.00040045	-0.075835	-0.046898	-0.023098	-0.037579	-0.023237	0.0005298	-0.019433	0.0025353	0.043134	0.031789	0.0017819	0.044506	0.07163	-0.034205	-0.011745	0.00024278
5923	-0.026842	-0.025065	0.67061	-0.019716	-0.027498	-0.049915	-0.016958	-0.031294	0.021423	1.52e-05	-0.032786	0.0016477	-0.0052795	0.040991	-0.041073	-0.010661	-0.013377	-0.013377	0.15751	-0.01432	-0.024467	0.023265	-0.019332	-0.024714	-0.0030378	0.042654	0.012257	-0.045473	-6.39e-05	0.01986	-0.031462	-0.0055701	-0.01924	-0.093691	-0.052488	-0.027078	-0.051428	-0.03093	-0.0023142	-0.029771	-0.012189	0.032037	0.032446	0.015083	0.085304	0.033344	-0.037683	0.032484	-0.013786
5925	-0.023163	-0.02249	0.61951	-0.0090625	-0.024278	-0.042034	-0.018341	-0.0094547	0.027878	0.0076582	-0.027609	0.004393	-0.005187	0.047852	-0.041561	-0.007636	-0.016447	-0.016447	0.11641	-0.0034288	-0.021078	0.022518	-0.024125	-0.02057	-0.0035896	0.043877	0.019369	-0.040549	0.012534	0.019953	-0.028456	0.010478	-0.0023918	-0.081672	-0.047207	-0.021451	-0.040445	-0.026753	0.0026709	-0.021453	-0.00050339	0.037491	0.033841	0.0069851	0.048183	0.070158	-0.034328	-0.0074377	0.0022702
5970	-0.020672	-0.02291	0.57694	-0.0052218	-0.02056	-0.03195	-0.020399	0.0052989	0.028022	0.0058108	-0.021385	0.010561	-0.0045609	0.054812	-0.041575	-0.0052399	-0.016467	-0.016467	0.10912	-0.00032141	-0.016615	0.016724	-0.027401	-0.020159	-0.0018673	0.045155	0.01961	-0.033016	0.02483	0.017574	-0.021468	0.012798	0.0047084	-0.070072	-0.04201	-0.020809	-0.028892	-0.018142	0.00351	-0.018706	0.0054171	0.045476	0.035842	0.0025577	0.045728	0.081575	-0.034831	-0.0075303	-0.0025758
5649	-0.02273	-0.012515	0.58396	-0.0078137	-0.019408	-0.037809	-0.019111	0.0047234	0.02284	0.0076306	-0.023757	-0.0014917	-0.0046536	0.050874	-0.040693	-0.010016	-0.015683	-0.015683	0.10249	0.0049102	-0.024807	0.021686	-0.030285	-0.023915	-0.0070512	0.033551	0.012601	-0.042743	0.014286	0.014575	-0.019576	0.017452	0.0095638	-0.075207	-0.048124	-0.029929	-0.030022	-0.018762	-0.0057888	-0.015337	0.0080672	0.041969	0.030858	-0.0046385	0.041455	0.073643	-0.035892	-0.018152	0.014253
5977	0	0	0	0	0	0	0	0	0	0	0	0	0	0	0	0	0	0	0	0	0	0	0	0	0	0	0	0	0	0	0	0	0	0	0	0	0	0	0	0	0	0	0	0	0	0	0	0	0
29984	-0.035725	-0.026118	0.69734	-0.018827	-0.025848	-0.057822	-0.010743	-0.026953	0.030735	0.010118	-0.0080687	0.0027853	0.01471	0.068548	-0.034232	-0.01958	-0.013064	-0.013064	0.11841	-0.015942	-0.016332	0.035195	-0.017083	-0.02444	-0.0034142	0.047685	0.0082662	-0.050748	-0.0093959	0.018379	-0.034223	0.014884	-0.023786	-0.096176	-0.042383	-0.0097084	-0.053777	-0.036328	-0.0042862	-0.015031	-0.015031	0.055014	0.048971	0.014748	0.012911	0.06186	-0.034858	-0.029259	-0.023645
387	-0.022932	-0.018802	0.58543	-0.0051768	-0.026598	-0.0382	-0.017528	-0.00076571	0.02867	0.0048799	-0.024101	0.0045339	-0.0091873	0.053115	-0.040334	-0.0054077	-0.0163	-0.0163	0.10407	-0.0059007	-0.020399	0.018486	-0.025672	-0.019767	-0.0040805	0.041293	0.016901	-0.038281	0.020688	0.020626	-0.025532	0.012716	0.0010987	-0.076556	-0.047656	-0.02412	-0.038317	-0.023659	-0.0012324	-0.020943	0.0022127	0.042527	0.030841	0.00057968	0.046061	0.069765	-0.034973	-0.013149	-0.00027172
10160	0	0	0	0	0	0	0	0	0	0	0	0	0	0	0	0	0	0	0	0	0	0	0	0	0	0	0	0	0	0	0	0	0	0	0	0	0	0	0	0	0	0	0	0	0	0	0	0	0
5576	-0.019757	-0.020567	0.59998	-0.0066313	-0.025519	-0.041751	-0.020506	-0.0046747	0.025963	0.0042319	-0.026924	0.0036776	-0.0092384	0.047863	-0.041575	-0.0054343	-0.015827	-0.015827	0.11455	-0.0061815	-0.022984	0.018741	-0.027341	-0.021375	-0.0049628	0.040791	0.016432	-0.038847	0.017736	0.019937	-0.027926	0.0098198	-0.00073623	-0.07709	-0.050591	-0.026255	-0.039807	-0.02567	-0.0011775	-0.024522	0.0027152	0.041596	0.028518	0.0016382	0.051818	0.06531	-0.034815	-0.0071938	-0.00096027
5577	-0.01006	-0.014524	0.53961	-0.0089559	-0.011474	-0.033698	-0.017238	0.01276	0.020846	0.0072634	-0.014323	0.014664	-0.0031642	0.04806	-0.040841	-0.013894	-0.020442	-0.020442	0.10647	0.0092972	-0.015144	0.023113	-0.022777	-0.024682	0.0026781	0.04356	0.016667	-0.034086	0.027146	0.010242	-0.016679	0.01841	0.0028846	-0.072665	-0.03615	-0.025762	-0.019787	-0.01189	-0.0072432	-0.010158	-0.0030901	0.045165	0.049285	0.002712	0.034764	0.06893	-0.03262	-0.020951	-0.010599
8737	-0.02189	-0.013935	0.57042	-0.0063879	-0.021367	-0.038201	-0.021564	0.003586	0.025188	0.007276	-0.02457	-0.00014117	-0.0058027	0.050578	-0.041598	-0.0074499	-0.016416	-0.016416	0.1033	0.0058241	-0.023729	0.020655	-0.030242	-0.019447	-0.0060438	0.036668	0.015915	-0.042499	0.01466	0.016159	-0.022222	0.018235	0.0060151	-0.076455	-0.047998	-0.026318	-0.032698	-0.020306	-0.0017723	-0.01395	0.0066818	0.043353	0.029711	-0.0028309	0.046485	0.075586	-0.035531	-0.014408	0.015883
9978	-0.023319	-0.020729	0.59741	-0.0054936	-0.027242	-0.039145	-0.020705	-0.0024529	0.028262	0.0051223	-0.025485	0.0029181	-0.0093307	0.052777	-0.041553	-0.0040116	-0.015052	-0.015052	0.10783	-0.0069169	-0.021209	0.017437	-0.026976	-0.020711	-0.0040373	0.041211	0.016677	-0.037784	0.015932	0.021602	-0.027039	0.010508	0.0019404	-0.074322	-0.049803	-0.02396	-0.040266	-0.025254	0.0019548	-0.023936	0.0058852	0.042865	0.028262	0.00061223	0.046506	0.071967	-0.034314	-0.011172	0.0013632
6093	-0.021534	-0.013595	0.574	-0.0064157	-0.020978	-0.039322	-0.02275	0.0036568	0.025558	0.0080066	-0.024905	-0.0019066	-0.0045591	0.052124	-0.042195	-0.0068952	-0.015965	-0.015965	0.10541	0.0076277	-0.024893	0.021623	-0.031707	-0.018747	-0.0061086	0.035669	0.015554	-0.043954	0.011895	0.015637	-0.022586	0.018759	0.0074588	-0.076426	-0.048772	-0.026169	-0.032743	-0.020355	-0.0014754	-0.01377	0.0085811	0.044478	0.028637	-0.0032744	0.046253	0.077639	-0.035535	-0.013698	0.018136
9475	-0.022122	-0.017064	0.60378	-0.0083813	-0.024164	-0.043217	-0.019357	-0.0054824	0.027419	0.0062497	-0.026553	-0.00086727	-0.0053397	0.049061	-0.042274	-0.006719	-0.014971	-0.014971	0.11118	0.0012531	-0.024494	0.022819	-0.027009	-0.019895	-0.0059463	0.038522	0.01581	-0.044519	0.010552	0.01859	-0.028603	0.012513	0.00075582	-0.082211	-0.050269	-0.025952	-0.040393	-0.02521	-0.0042638	-0.019051	0.0020066	0.040722	0.030281	0.0019446	0.048388	0.066828	-0.035375	-0.013829	0.0082713
6098	-0.023908	-0.010023	0.60041	-0.0085015	-0.018121	-0.040456	-0.024329	0.0053506	0.022182	0.010834	-0.025425	-0.0058043	-0.0027186	0.050934	-0.041097	-0.012183	-0.01624	-0.01624	0.10593	0.013008	-0.025769	0.02313	-0.033938	-0.024139	-0.0074118	0.032446	0.01035	-0.046365	0.0065131	0.010826	-0.020406	0.020125	0.0093459	-0.076698	-0.048926	-0.029191	-0.030255	-0.020508	-0.0053921	-0.012111	0.0096692	0.041926	0.031108	-0.0050146	0.035242	0.078349	-0.038219	-0.018791	0.020454
6194	-0.024253	-0.016972	0.57957	-0.0057679	-0.026986	-0.037796	-0.018631	0.0004173	0.027389	0.0050907	-0.025431	0.0045873	-0.010182	0.049817	-0.040236	-0.0063483	-0.016059	-0.016059	0.10422	-0.0040275	-0.020086	0.016109	-0.026899	-0.02207	-0.0034785	0.039765	0.01605	-0.038223	0.023561	0.019245	-0.024013	0.011654	0.0032298	-0.076499	-0.048561	-0.028331	-0.036753	-0.022208	-0.0039208	-0.021146	0.002103	0.04114	0.031817	0.00066938	0.045878	0.065398	-0.034846	-0.014179	-0.0022249
6197	-0.026406	-0.0099874	0.68677	-0.025084	-0.016552	-0.058631	-0.019673	-0.021659	0.018153	0.011445	-0.027976	-0.012243	0.0058402	0.041375	-0.039513	-0.021307	-0.0095762	-0.0095762	0.1264	0.005777	-0.032392	0.03765	-0.026452	-0.0265	-0.010872	0.025176	0.0035336	-0.059535	-0.017726	0.0082992	-0.027158	0.011575	-0.007706	-0.097356	-0.054135	-0.028748	-0.04375	-0.03021	-0.015617	-0.014496	0.0025688	0.030066	0.031219	0.005979	0.029401	0.046403	-0.039545	-0.025016	0.0069514
6256	-0.017654	-0.024318	0.54291	-0.0044027	-0.020206	-0.029814	-0.019047	0.006492	0.03297	0.0070733	-0.021672	0.013323	-0.0042567	0.059207	-0.045648	-0.0035118	-0.014399	-0.014399	0.11316	0.0071287	-0.011453	0.016212	-0.024062	-0.02037	0.0053651	0.048607	0.024988	-0.023257	0.01985	0.015712	-0.020915	0.0076199	0.0043504	-0.065832	-0.037503	-0.021499	-0.024471	-0.014637	0.011176	-0.013307	0.0034525	0.047256	0.042937	0.01742	0.057669	0.088843	-0.033601	0.0065438	-0.0057349
8720	-0.041874	-0.023526	0.71077	-0.0031512	-0.025822	-0.055616	0.0095811	-0.042703	0.030118	0.0069927	-0.014467	0.029452	-0.0051216	0.056573	-0.038424	-0.026835	-0.0089637	-0.0089637	0.11198	-0.017934	-0.023926	0.034818	-0.0061958	-0.032588	-0.0098199	0.040951	-0.0078007	-0.055623	-0.010457	0.0373	-0.037929	0.033994	-0.036969	-0.10357	-0.028965	0.021885	-0.051017	-0.02647	-0.02194	-0.015839	-0.015627	0.018861	0.055586	0.015093	0.010099	0.027201	-0.041645	-0.03521	-0.035536
5704	-0.02395	-0.019914	0.58927	-0.0049652	-0.027308	-0.038641	-0.017578	-0.0015793	0.029028	0.0045939	-0.023892	0.0037261	-0.0085063	0.054304	-0.04049	-0.0046185	-0.016409	-0.016409	0.10499	-0.0069999	-0.020558	0.018046	-0.026253	-0.018678	-0.0043081	0.041632	0.01716	-0.038339	0.019401	0.02119	-0.026264	0.012589	0.0010412	-0.076423	-0.047911	-0.023528	-0.03952	-0.024596	-0.00028822	-0.021278	0.0025474	0.04409	0.029563	0.0005204	0.046117	0.071471	-0.03479	-0.012174	0.00080556
55811	-0.032205	-0.020403	0.72571	-0.025926	-0.023746	-0.057318	-0.013603	-0.031583	0.022441	0.0088824	-0.024011	-0.0065794	0.0038117	0.049253	-0.037267	-0.02101	-0.0081845	-0.0081845	0.1247	-0.015443	-0.024211	0.033135	-0.016451	-0.030765	-0.0057377	0.037187	0.0017993	-0.051258	-0.013653	0.015728	-0.036683	-0.0016204	-0.018649	-0.096769	-0.054106	-0.026741	-0.05628	-0.037372	-0.013733	-0.030856	-0.011221	0.023408	0.045411	0.013172	0.023343	0.037256	-0.037258	-0.03318	-0.027068
6295	-0.017921	-0.021473	0.65037	-0.022699	-0.025042	-0.054634	-0.016123	-0.023038	0.024414	0.00057681	-0.024702	0.0038695	-0.0001228	0.037019	-0.043139	-0.014203	-0.011695	-0.011695	0.12686	-0.0012984	-0.027159	0.028786	-0.019272	-0.024231	-0.0068541	0.04706	0.011934	-0.046776	0.0027697	0.019265	-0.037756	0.0021331	-0.017024	-0.093314	-0.049768	-0.022044	-0.047838	-0.029803	-0.013744	-0.021165	-0.007728	0.035351	0.037192	0.015256	0.049294	0.038598	-0.0338	-0.012647	-0.017545
56681	-0.035725	-0.026118	0.69734	-0.018827	-0.025848	-0.057822	-0.010743	-0.026953	0.030735	0.010118	-0.0080687	0.0027853	0.01471	0.068548	-0.034232	-0.01958	-0.013064	-0.013064	0.11841	-0.015942	-0.016332	0.035195	-0.017083	-0.02444	-0.0034142	0.047685	0.0082662	-0.050748	-0.0093959	0.018379	-0.034223	0.014884	-0.023786	-0.096176	-0.042383	-0.0097084	-0.053777	-0.036328	-0.0042862	-0.015031	-0.015031	0.055014	0.048971	0.014748	0.012911	0.06186	-0.034858	-0.029259	-0.023645
4254	-0.023609	-0.017082	0.58169	-0.0055121	-0.026296	-0.037447	-0.017919	0.00021159	0.027466	0.0040588	-0.025697	0.0037938	-0.011074	0.049644	-0.040557	-0.0060454	-0.016029	-0.016029	0.10332	-0.004512	-0.020962	0.016636	-0.026186	-0.022103	-0.0044265	0.039233	0.015901	-0.038092	0.023994	0.01968	-0.024163	0.010936	0.0038268	-0.075992	-0.04912	-0.028428	-0.036619	-0.022204	-0.00499	-0.022405	0.0027856	0.040101	0.03086	-0.00042221	0.046712	0.065211	-0.035052	-0.014356	-0.0018312
6387	-0.022837	-0.017643	0.57796	-0.0042353	-0.025316	-0.03637	-0.01579	0.0019992	0.026838	0.0045851	-0.024698	0.0043856	-0.011111	0.050042	-0.040714	-0.0059463	-0.016051	-0.016051	0.10123	-0.004835	-0.020952	0.016008	-0.026129	-0.023104	-0.0052017	0.038121	0.015328	-0.036209	0.024218	0.020279	-0.023135	0.011338	0.006459	-0.072363	-0.047816	-0.02806	-0.034032	-0.020276	-0.0041795	-0.022691	0.0044014	0.040709	0.030709	-0.0012251	0.047962	0.067908	-0.034439	-0.012534	0.00081012
462	-0.022446	-0.019516	0.58349	-0.0045515	-0.026809	-0.038664	-0.01983	-0.00065873	0.027419	0.0051841	-0.025084	0.0044303	-0.011168	0.048921	-0.041436	-0.0057253	-0.016192	-0.016192	0.10376	-0.0048106	-0.021189	0.016624	-0.026914	-0.020027	-0.0053736	0.04008	0.016795	-0.037799	0.020969	0.020187	-0.025325	0.011416	0.00076116	-0.075488	-0.048777	-0.024709	-0.037714	-0.023417	-0.0017291	-0.022149	0.0041695	0.041311	0.029804	0.0010609	0.046974	0.069506	-0.034407	-0.011751	8.76e-05
6418	-0.021971	-0.019586	0.58817	-0.0055246	-0.026862	-0.039059	-0.019325	-0.0014997	0.028076	0.004579	-0.024925	0.0047681	-0.010069	0.049621	-0.041467	-0.0044047	-0.015318	-0.015318	0.10569	-0.005318	-0.021472	0.017338	-0.026218	-0.019986	-0.0053781	0.040725	0.0172	-0.037968	0.019956	0.021353	-0.02678	0.011438	0.0005196	-0.07564	-0.048652	-0.023221	-0.038574	-0.023798	-0.00039291	-0.022143	0.0042432	0.042037	0.028959	0.0015555	0.050295	0.068415	-0.03427	-0.0098033	0.00081448
6464	-0.022306	-0.015322	0.56892	-0.0054323	-0.021353	-0.036503	-0.019203	0.0038769	0.026401	0.0062372	-0.023965	0.0036347	-0.0080853	0.049485	-0.040621	-0.0066363	-0.016735	-0.016735	0.10242	0.0033738	-0.021314	0.019847	-0.027742	-0.020116	-0.005341	0.038668	0.016416	-0.038853	0.019214	0.017731	-0.022189	0.016688	0.0046134	-0.075359	-0.045867	-0.024465	-0.032349	-0.019341	-0.0015782	-0.015331	0.0047743	0.042854	0.031926	-0.0013169	0.047162	0.071983	-0.035311	-0.012796	0.014639
5777	-0.024696	-0.015287	0.53958	-0.0046201	-0.02935	-0.043081	-0.011012	-0.00164	0.04613	0.0088623	-0.027627	0.0075713	-0.01344	0.05223	-0.041303	-0.01089	-0.014992	-0.014992	0.10175	0.0010714	-0.013303	0.021071	-0.01513	-0.018061	0.0021842	0.04511	0.019435	-0.035045	0.01198	0.020472	-0.0265	0.010634	-0.0050429	-0.079287	-0.04601	-0.021079	-0.041452	-0.026259	0.00093094	-0.012872	-0.0031364	0.034047	0.043522	0.019549	0.048767	0.065137	-0.029916	-0.0052079	-0.0069953
5781	-0.026556	-0.020405	0.58308	-0.002382	-0.030481	-0.043291	-0.013555	-0.0053587	0.045026	0.0069624	-0.029599	0.0035784	-0.011375	0.051887	-0.038026	-0.0092139	-0.017157	-0.017157	0.10315	-0.0082716	-0.017508	0.020609	-0.01765	-0.01275	-0.0050796	0.042553	0.017899	-0.039178	0.014569	0.024297	-0.028858	0.012898	-0.003437	-0.076961	-0.049782	-0.015258	-0.047427	-0.031921	0.002811	-0.023027	0.0028273	0.033496	0.033197	0.0085375	0.042283	0.068877	-0.029598	-0.0096784	0.0014901
25942	-0.022737	-0.020114	0.58948	-0.0056273	-0.025393	-0.037298	-0.020057	-0.0013313	0.028827	0.0044979	-0.024923	0.0035885	-0.0086268	0.051607	-0.040579	-0.0043486	-0.015141	-0.015141	0.10487	-0.0053109	-0.021194	0.017818	-0.027035	-0.021054	-0.0049802	0.040209	0.017365	-0.03583	0.021538	0.020328	-0.025308	0.0096285	0.004206	-0.075402	-0.048194	-0.025368	-0.03822	-0.023735	-0.00048618	-0.02406	0.0034532	0.042171	0.029563	0.00068331	0.04912	0.068955	-0.03475	-0.011856	0.0007546
51763	-0.02557	-0.015373	0.52765	-0.0048444	-0.029672	-0.04357	-0.0085444	-0.0029305	0.05739	0.011321	-0.028966	0.0095954	-0.01634	0.060973	-0.038952	-0.010901	-0.011796	-0.011796	0.10069	0.0017133	-0.0076344	0.024217	-0.0046849	-0.014763	0.0081064	0.045982	0.022558	-0.032092	0.0043567	0.021647	-0.025955	0.012009	-0.00925	-0.076259	-0.040618	-0.014753	-0.043469	-0.027757	0.010528	-0.0092102	-0.0037702	0.032311	0.049752	0.034231	0.052326	0.067002	-0.026339	0.0029904	-0.0081257
6500	-0.023615	-0.019085	0.59146	-0.00571	-0.027073	-0.03881	-0.019838	-0.0018439	0.027806	0.0043833	-0.025835	0.0029333	-0.0099059	0.051474	-0.041121	-0.0049124	-0.015326	-0.015326	0.10687	-0.0059845	-0.021422	0.017271	-0.02672	-0.021628	-0.0039796	0.040353	0.016146	-0.038149	0.018991	0.020572	-0.025902	0.010329	0.002857	-0.075442	-0.050132	-0.026618	-0.039223	-0.024215	-0.0016835	-0.023485	0.0046052	0.041704	0.029066	0.00011679	0.045764	0.06824	-0.034732	-0.013314	-0.00033947
6502	-0.019405	-0.010845	0.54792	-0.0096536	-0.017208	-0.035423	-0.014989	0.0094341	0.022485	0.0044099	-0.015684	0.012938	-0.005935	0.047664	-0.040083	-0.014119	-0.017985	-0.017985	0.10119	0.0070698	-0.01649	0.019852	-0.020493	-0.025976	0.00096683	0.041476	0.01408	-0.036427	0.027269	0.012248	-0.017782	0.016801	0.001208	-0.077735	-0.038505	-0.025825	-0.023983	-0.012156	-0.012331	-0.0094222	-0.0043174	0.041588	0.048644	0.0036739	0.036929	0.059356	-0.034133	-0.02353	-0.014077
4086	-0.020091	-0.016714	0.55518	-0.0078781	-0.024549	-0.037664	-0.017432	0.0022765	0.030473	0.0059163	-0.02415	0.0086981	-0.0095195	0.05244	-0.044877	-0.0070221	-0.014824	-0.014824	0.1069	0.0039594	-0.016887	0.017875	-0.023303	-0.023084	0.0022449	0.045159	0.0195	-0.03422	0.01821	0.017648	-0.024455	0.0090354	0.0011431	-0.076462	-0.044181	-0.02729	-0.032424	-0.018924	-0.00017408	-0.01422	-0.00099214	0.042016	0.040187	0.011912	0.053607	0.070202	-0.034072	-0.005766	-0.0070284
4087	-0.020301	-0.020094	0.56546	-0.005623	-0.021168	-0.031628	-0.018586	0.0053946	0.028202	0.0061473	-0.022028	0.010242	-0.0075664	0.053413	-0.042555	-0.0060406	-0.015871	-0.015871	0.10761	0.0023784	-0.01628	0.017313	-0.025055	-0.021575	-0.0001727	0.044053	0.019497	-0.032841	0.024356	0.017065	-0.021741	0.012123	0.0033892	-0.07165	-0.041884	-0.023271	-0.028313	-0.016981	0.001482	-0.016179	0.0029466	0.043909	0.037936	0.0057323	0.04849	0.076827	-0.03518	-0.0075721	-0.004198
4088	-0.023811	-0.023241	0.58786	-0.0067345	-0.023894	-0.034104	-0.02098	-0.00014635	0.027658	0.0059963	-0.024545	0.0083057	-0.0085027	0.049978	-0.043485	-0.0064875	-0.018204	-0.018204	0.10953	-0.0011961	-0.017637	0.017827	-0.02732	-0.015194	-0.00069549	0.044821	0.019873	-0.039032	0.017584	0.017513	-0.027406	0.012082	0.0017727	-0.076831	-0.044595	-0.022031	-0.033844	-0.02131	0.0063503	-0.019093	-1.14e-05	0.040631	0.033265	0.0048351	0.0508	0.076981	-0.037898	-0.0045455	-0.0029664
4089	-0.021618	-0.025522	0.59644	-0.0059655	-0.02315	-0.035457	-0.019455	-0.0017016	0.029535	0.0062319	-0.024312	0.0082457	-0.005917	0.052097	-0.043779	-0.0049653	-0.016082	-0.016082	0.11356	-0.0022138	-0.018044	0.017573	-0.026894	-0.019532	-0.0027147	0.046381	0.020588	-0.034195	0.018203	0.019865	-0.026125	0.0090971	0.0018342	-0.073262	-0.044536	-0.019983	-0.034381	-0.022706	0.0057544	-0.020157	0.0036524	0.043693	0.034018	0.0063455	0.04983	0.081938	-0.034346	-0.0026471	-0.0026564
4090	-0.018271	-0.015709	0.553	-0.0076092	-0.025765	-0.039658	-0.016383	-0.0017234	0.033256	0.0056972	-0.025516	0.006195	-0.0125	0.049761	-0.046526	-0.0060713	-0.013502	-0.013502	0.10553	0.0026183	-0.018731	0.020204	-0.02274	-0.023392	0.00059591	0.044773	0.019901	-0.035466	0.014359	0.019829	-0.027507	0.0063022	-0.0015712	-0.079703	-0.047281	-0.028868	-0.036982	-0.021383	-0.0021167	-0.015235	-0.0015112	0.041272	0.037826	0.012557	0.057815	0.066049	-0.034697	-0.0055773	-0.0054954
4091	-0.020256	-0.019212	0.56662	-0.0056366	-0.022905	-0.035332	-0.018611	0.0038642	0.02965	0.0055687	-0.023056	0.0084981	-0.0093972	0.05247	-0.042732	-0.0057303	-0.016149	-0.016149	0.10445	0.00039501	-0.017557	0.017829	-0.025033	-0.021039	-0.0013198	0.044277	0.019955	-0.034036	0.022365	0.018921	-0.022545	0.012302	0.0023234	-0.072907	-0.044382	-0.024117	-0.031521	-0.01952	0.0010663	-0.01712	0.0028399	0.043614	0.036108	0.005244	0.050471	0.076368	-0.034105	-0.0081508	-0.002123
4092	-0.0197	-0.018715	0.56504	-0.0053362	-0.022819	-0.035485	-0.018483	0.0038673	0.029294	0.0053225	-0.023477	0.0084251	-0.0096278	0.051731	-0.042834	-0.0058084	-0.01647	-0.01647	0.10438	0.00039715	-0.018052	0.017526	-0.025079	-0.021115	-0.001385	0.044512	0.019739	-0.033998	0.022797	0.018809	-0.02318	0.011788	0.0030891	-0.072729	-0.044459	-0.024845	-0.031276	-0.019412	0.00028224	-0.017525	0.0023469	0.042521	0.035677	0.0047781	0.050368	0.076243	-0.034143	-0.0083787	-0.0021736
6608	-0.020435	-0.0086187	0.51497	-0.009825	-0.02459	-0.038407	-0.012416	0.0064572	0.031813	0.0060705	-0.021136	0.012247	-0.01338	0.055017	-0.045241	-0.010601	-0.012677	-0.012677	0.10229	0.0095961	-0.010235	0.020136	-0.01641	-0.028288	0.0098654	0.044102	0.019867	-0.030084	0.016417	0.013635	-0.019127	0.0086943	-0.0022591	-0.078381	-0.038086	-0.03088	-0.026762	-0.012913	-0.0036729	-0.0056324	-0.0057696	0.03999	0.052973	0.023164	0.054347	0.058534	-0.033346	-0.0063923	-0.016622
6609	0	0	0	0	0	0	0	0	0	0	0	0	0	0	0	0	0	0	0	0	0	0	0	0	0	0	0	0	0	0	0	0	0	0	0	0	0	0	0	0	0	0	0	0	0	0	0	0	0
6610	-0.039311	-0.012474	0.54021	-0.0078251	-0.036397	-0.057976	0.015789	-0.028518	0.10571	0.012728	-0.033315	0.0088349	-0.0055369	0.044197	-0.014515	-0.045788	-0.014435	-0.014435	0.097142	-0.010833	0.010046	0.048678	0.039674	0.018326	0.0025189	0.045565	0.018396	-0.049249	-0.01735	0.026845	-0.024403	0.0081471	-0.039047	-0.093141	-0.034706	0.023855	-0.072228	-0.054012	-4.56e-05	-0.010827	-0.011473	-0.0071418	0.075555	0.066487	-0.0046778	0.011303	-0.011811	-0.016922	-0.02672
9612	-0.023066	-0.018342	0.58009	-0.0058177	-0.024325	-0.036445	-0.018987	0.0013793	0.027525	0.0052569	-0.023478	0.0056339	-0.0090932	0.050435	-0.040444	-0.0060349	-0.016272	-0.016272	0.10356	-0.003388	-0.019715	0.017447	-0.026294	-0.021385	-0.0035345	0.040509	0.017135	-0.036721	0.023607	0.019275	-0.023496	0.01184	0.0028403	-0.075615	-0.046219	-0.025533	-0.03495	-0.021416	-0.0022409	-0.021091	0.0019414	0.04197	0.033196	0.0008827	0.046556	0.068027	-0.034991	-0.013876	-0.0012485
6615	-0.024282	-0.016845	0.58055	-0.0060019	-0.026782	-0.037811	-0.018516	0.00011865	0.027194	0.0047391	-0.025779	0.0041659	-0.010608	0.049393	-0.040327	-0.0064939	-0.016201	-0.016201	0.10456	-0.0039611	-0.020588	0.016275	-0.026815	-0.022159	-0.0035068	0.039535	0.015804	-0.038511	0.023954	0.019037	-0.024018	0.011228	0.0032608	-0.076849	-0.048919	-0.028956	-0.036771	-0.022188	-0.0049932	-0.021874	0.0019719	0.040321	0.031799	0.00022135	0.045672	0.064447	-0.035078	-0.014942	-0.0024786
6622	-0.033228	-0.021604	0.69726	-0.01234	-0.022483	-0.036627	-0.019362	-0.0053778	0.023426	0.013615	-0.022308	0.00093065	-0.0024638	0.050129	-0.035661	-0.01188	-0.011379	-0.011379	0.10154	-0.012777	-0.019915	0.024468	-0.022171	-0.02376	-0.0090733	0.037245	0.010849	-0.045244	0.0055882	0.016859	-0.028675	0.010723	-0.0017964	-0.079125	-0.048548	-0.021235	-0.042596	-0.029177	0.0014224	-0.02771	0.00061783	0.030615	0.026306	0.0023572	0.030353	0.066877	-0.039309	-0.016112	-0.010288
6498	-0.023121	-0.01763	0.58018	-0.0076605	-0.023712	-0.036783	-0.018871	0.0012595	0.02749	0.0042526	-0.023217	0.0054146	-0.0085316	0.050903	-0.040695	-0.0070804	-0.015755	-0.015755	0.10384	-0.0030153	-0.020072	0.018376	-0.025727	-0.022381	-0.0034451	0.040466	0.016637	-0.0372	0.023161	0.01834	-0.022492	0.01141	0.0018182	-0.077311	-0.046657	-0.0265	-0.035075	-0.021244	-0.0042252	-0.020491	0.0015603	0.041821	0.034879	0.0015147	0.046119	0.065488	-0.034978	-0.015578	-0.0035464
6647	-0.030097	-0.020357	0.65736	-0.0095408	-0.024166	-0.035134	-0.021191	-0.0016191	0.022699	0.010064	-0.023397	0.0025296	-0.0063266	0.049904	-0.039543	-0.0099125	-0.014446	-0.014446	0.10404	-0.0088147	-0.019477	0.019746	-0.027068	-0.02112	-0.006018	0.037293	0.011967	-0.044899	0.0089687	0.017214	-0.029241	0.011892	0.0015022	-0.078349	-0.046359	-0.023567	-0.03991	-0.025554	0.0029674	-0.02593	-6.95e-05	0.036617	0.027316	0.00058573	0.038279	0.068211	-0.038393	-0.012694	-0.0072547
9530	-0.0097669	-0.012382	0.56047	-0.023699	-0.02603	-0.050527	-0.0087609	-0.023724	0.038816	0.0016849	-0.026205	0.0042386	-0.0062096	0.033284	-0.056383	-0.016079	-0.0086554	-0.0086554	0.11832	0.015954	-0.023693	0.032829	-0.014999	-0.030318	0.0019023	0.0518	0.01753	-0.040953	-0.0078686	0.019413	-0.039654	-0.012473	-0.01862	-0.1047	-0.050291	-0.0334	-0.047458	-0.026304	-0.018586	-0.0094199	-0.018438	0.031103	0.052317	0.032478	0.063442	0.037132	-0.037638	-0.005902	-0.027132
6654	-0.02352	-0.022828	0.59257	-0.0047699	-0.026972	-0.037256	-0.0204	-0.0033149	0.027167	0.0034485	-0.026882	0.0042638	-0.010228	0.050931	-0.041294	-0.0034612	-0.015823	-0.015823	0.11568	-0.0077843	-0.020737	0.015461	-0.025938	-0.018831	-0.0045359	0.042064	0.018351	-0.035763	0.018868	0.022058	-0.024286	0.0098682	0.0011626	-0.073013	-0.048712	-0.023213	-0.039788	-0.024436	0.0052108	-0.024377	0.0032179	0.04297	0.027989	0.0012059	0.06496	0.070006	-0.034228	0.0057754	0.0037523
6655	-0.023426	-0.02011	0.59161	-0.0054528	-0.026744	-0.037768	-0.020004	-0.0031112	0.025776	0.0028169	-0.027136	0.0040718	-0.010544	0.050427	-0.040735	-0.004878	-0.016732	-0.016732	0.11974	-0.0072609	-0.021619	0.015032	-0.026207	-0.020922	-0.0041279	0.040497	0.016657	-0.037965	0.021449	0.020643	-0.023586	0.0085367	0.0010119	-0.07546	-0.050251	-0.027382	-0.038728	-0.02293	0.00058985	-0.02433	0.0015925	0.04147	0.028489	0.0012558	0.066561	0.065269	-0.034786	0.0081111	0.00095875
6667	-0.021298	-0.024375	0.57516	-0.0032741	-0.021078	-0.03139	-0.020509	0.0060243	0.027942	0.0060376	-0.021038	0.010426	-0.0053157	0.054457	-0.042282	-0.0044043	-0.017084	-0.017084	0.10921	-0.00049646	-0.015984	0.014855	-0.028762	-0.018897	-0.001881	0.045012	0.02032	-0.031812	0.024814	0.0179	-0.021789	0.012868	0.0049365	-0.068083	-0.041635	-0.020173	-0.028602	-0.018485	0.0057523	-0.017998	0.005963	0.047094	0.034943	0.0024585	0.046406	0.085415	-0.034204	-0.0049554	-0.001317
6670	-0.019405	-0.010845	0.54792	-0.0096536	-0.017208	-0.035423	-0.014989	0.0094341	0.022485	0.0044099	-0.015684	0.012938	-0.005935	0.047664	-0.040083	-0.014119	-0.017985	-0.017985	0.10119	0.0070698	-0.01649	0.019852	-0.020493	-0.025976	0.00096683	0.041476	0.01408	-0.036427	0.027269	0.012248	-0.017782	0.016801	0.001208	-0.077735	-0.038505	-0.025825	-0.023983	-0.012156	-0.012331	-0.0094222	-0.0043174	0.041588	0.048644	0.0036739	0.036929	0.059356	-0.034133	-0.02353	-0.014077
8877	-0.024099	-0.020045	0.57872	-0.0085716	-0.022658	-0.032231	-0.023572	0.0026624	0.025613	0.0063066	-0.023773	0.0028184	-0.0054538	0.052852	-0.042011	-0.0067146	-0.016222	-0.016222	0.10593	0.0035091	-0.021566	0.018999	-0.031146	-0.017191	-0.0047	0.040087	0.016913	-0.041103	0.017338	0.017044	-0.022471	0.017348	0.0045304	-0.074526	-0.047338	-0.024183	-0.03348	-0.020473	0.0036553	-0.015055	0.0083686	0.044365	0.0284	-0.0015681	0.045116	0.080154	-0.036889	-0.0099511	0.0088516
10252	0	0	0	0	0	0	0	0	0	0	0	0	0	0	0	0	0	0	0	0	0	0	0	0	0	0	0	0	0	0	0	0	0	0	0	0	0	0	0	0	0	0	0	0	0	0	0	0	0
6709	-0.022105	-0.01927	0.59256	-0.0062693	-0.027012	-0.039241	-0.018706	-0.0031395	0.028451	0.0032764	-0.025831	0.0025763	-0.010236	0.049639	-0.041808	-0.0049406	-0.015035	-0.015035	0.10602	-0.0053568	-0.02176	0.017402	-0.026508	-0.021204	-0.005422	0.040223	0.015933	-0.038868	0.019523	0.020627	-0.027418	0.0089101	0.0019565	-0.076899	-0.04979	-0.027033	-0.040246	-0.024793	-0.0036122	-0.0241	0.0028275	0.041025	0.029766	0.00068588	0.048557	0.065144	-0.034713	-0.013621	-0.0013189
6714	-0.024454	-0.014273	0.58852	-0.0087275	-0.021727	-0.035947	-0.021879	0.0024675	0.024391	0.0090329	-0.025009	-0.00035865	-0.0075555	0.049159	-0.041619	-0.010064	-0.017025	-0.017025	0.10347	0.0047081	-0.023281	0.020933	-0.030218	-0.020349	-0.0064326	0.036312	0.014484	-0.045732	0.010594	0.015334	-0.022883	0.018173	0.0050044	-0.078034	-0.047819	-0.025963	-0.033912	-0.02099	0.00020264	-0.015453	0.0059608	0.040063	0.029849	-0.002392	0.043805	0.074185	-0.037129	-0.014725	0.015096
6722	-0.020643	-0.025867	0.58651	-0.0025321	-0.022322	-0.035153	-0.021405	0.0032397	0.027966	0.0047955	-0.023812	0.0077428	-0.0040296	0.053896	-0.043166	-0.0032058	-0.017406	-0.017406	0.11077	-0.0045897	-0.01887	0.014526	-0.029356	-0.017936	-0.0032639	0.045584	0.020048	-0.032138	0.021052	0.019226	-0.025063	0.010053	0.0052812	-0.068121	-0.044196	-0.019767	-0.032621	-0.021702	0.0070639	-0.023164	0.0063819	0.044382	0.030869	0.00084415	0.048617	0.086692	-0.033143	-0.0033918	0.00062602
6772	-0.020526	-0.022468	0.57493	-0.0032255	-0.020514	-0.034423	-0.022836	0.0055046	0.0268	0.006768	-0.023252	0.0055677	-0.0029229	0.052882	-0.043032	-0.0046932	-0.018168	-0.018168	0.10897	0.0034604	-0.019919	0.016422	-0.031817	-0.017882	-0.004239	0.043643	0.019483	-0.035074	0.018245	0.017349	-0.023635	0.015059	0.0066003	-0.069023	-0.043951	-0.020428	-0.029924	-0.019791	0.0067314	-0.016505	0.0072002	0.046538	0.031411	-0.00034131	0.048161	0.089394	-0.033676	-0.0040442	0.014838
6773	-0.019405	-0.010845	0.54792	-0.0096536	-0.017208	-0.035423	-0.014989	0.0094341	0.022485	0.0044099	-0.015684	0.012938	-0.005935	0.047664	-0.040083	-0.014119	-0.017985	-0.017985	0.10119	0.0070698	-0.01649	0.019852	-0.020493	-0.025976	0.00096683	0.041476	0.01408	-0.036427	0.027269	0.012248	-0.017782	0.016801	0.001208	-0.077735	-0.038505	-0.025825	-0.023983	-0.012156	-0.012331	-0.0094222	-0.0043174	0.041588	0.048644	0.0036739	0.036929	0.059356	-0.034133	-0.02353	-0.014077
6774	-0.019333	-0.016425	0.53473	-0.006391	-0.019889	-0.032925	-0.018493	0.0079484	0.029609	0.0076749	-0.021678	0.010084	-0.0051154	0.056765	-0.044558	-0.0075241	-0.014913	-0.014913	0.10882	0.011707	-0.013977	0.018801	-0.02488	-0.022882	0.0045737	0.044521	0.021009	-0.030492	0.018425	0.013028	-0.019275	0.012582	0.004927	-0.072018	-0.039305	-0.027286	-0.02371	-0.012922	0.0033439	-0.0066593	0.0011425	0.046071	0.044634	0.014126	0.053222	0.080451	-0.034289	-0.0019296	0.0028171
6775	0	0	0	0	0	0	0	0	0	0	0	0	0	0	0	0	0	0	0	0	0	0	0	0	0	0	0	0	0	0	0	0	0	0	0	0	0	0	0	0	0	0	0	0	0	0	0	0	0
6776	-0.019405	-0.010845	0.54792	-0.0096536	-0.017208	-0.035423	-0.014989	0.0094341	0.022485	0.0044099	-0.015684	0.012938	-0.005935	0.047664	-0.040083	-0.014119	-0.017985	-0.017985	0.10119	0.0070698	-0.01649	0.019852	-0.020493	-0.025976	0.00096683	0.041476	0.01408	-0.036427	0.027269	0.012248	-0.017782	0.016801	0.001208	-0.077735	-0.038505	-0.025825	-0.023983	-0.012156	-0.012331	-0.0094222	-0.0043174	0.041588	0.048644	0.0036739	0.036929	0.059356	-0.034133	-0.02353	-0.014077
51684	-0.020474	-0.014256	0.54245	-0.0091945	-0.024725	-0.037995	-0.016115	0.0017975	0.031715	0.0066178	-0.023595	0.0087448	-0.010795	0.053518	-0.044554	-0.0079023	-0.013345	-0.013345	0.10474	0.0055972	-0.015172	0.019451	-0.020751	-0.025025	0.0047789	0.043832	0.019534	-0.032741	0.016852	0.016297	-0.023199	0.0077477	-2.98e-05	-0.078883	-0.042843	-0.030355	-0.032451	-0.017694	-0.0012617	-0.011788	-0.0037896	0.041876	0.044199	0.01724	0.056257	0.064061	-0.034112	-0.0063324	-0.0098694
7341	-0.022121	-0.01731	0.58159	-0.0056521	-0.025005	-0.037601	-0.01841	8.29e-05	0.027205	0.004474	-0.025878	0.0038888	-0.011103	0.049479	-0.040657	-0.006157	-0.016175	-0.016175	0.10439	-0.0044417	-0.020979	0.017771	-0.026261	-0.021973	-0.0040268	0.039656	0.016123	-0.038401	0.023675	0.019315	-0.024338	0.010935	0.0032782	-0.076376	-0.049111	-0.028547	-0.036874	-0.022585	-0.0046226	-0.022511	0.0024178	0.040151	0.031018	-0.00020345	0.046034	0.065358	-0.035008	-0.014711	-0.0018028
6850	-0.021554	-0.013204	0.57241	-0.0059976	-0.020916	-0.038602	-0.022111	0.0042104	0.025365	0.0078519	-0.024507	-0.00088209	-0.0060215	0.051005	-0.042178	-0.0071131	-0.016354	-0.016354	0.10397	0.0071471	-0.024227	0.021022	-0.030935	-0.01998	-0.0062359	0.036369	0.015524	-0.043318	0.01347	0.015954	-0.022575	0.018392	0.0066026	-0.076179	-0.048095	-0.025963	-0.032198	-0.019689	-0.001635	-0.013408	0.0075893	0.043924	0.029924	-0.0029932	0.046697	0.076753	-0.035606	-0.013567	0.0174
2779	-0.034295	-0.016504	0.50344	-0.0049546	-0.033849	-0.049388	0.011209	-0.011779	0.082372	0.015627	-0.039944	0.0092246	-0.0102	0.046091	-0.02492	-0.025332	-0.019405	-0.019405	0.10145	-0.00058864	8.12e-05	0.031888	0.0092918	-0.0017043	0.0066773	0.047972	0.022878	-0.04077	0.0058748	0.021615	-0.026436	0.010434	-0.018888	-0.086357	-0.038163	0.00092075	-0.056071	-0.039278	0.0034536	-0.0055815	-0.012542	0.0092657	0.051413	0.048674	0.036479	0.041637	-0.017255	0.0020354	-0.012354
10454	-0.023451	-0.019675	0.59342	-0.006564	-0.027971	-0.039732	-0.019151	-0.0042494	0.026313	0.0022892	-0.026812	0.0037337	-0.010229	0.049245	-0.040959	-0.004824	-0.014327	-0.014327	0.11043	-0.0071255	-0.023799	0.016601	-0.025724	-0.020689	-0.0053519	0.03938	0.014978	-0.038083	0.020039	0.020389	-0.027252	0.011821	0.0012669	-0.076061	-0.05003	-0.026191	-0.039933	-0.024556	-0.0021986	-0.023116	0.0025827	0.041608	0.028564	-6.01e-05	0.053699	0.061614	-0.035366	-0.010059	-4.12e-05
23118	-0.023035	-0.017257	0.58165	-0.0053486	-0.026555	-0.037673	-0.018352	0.00028051	0.027564	0.0042307	-0.025496	0.0041166	-0.010962	0.050017	-0.040544	-0.0057628	-0.015996	-0.015996	0.10329	-0.0045057	-0.020641	0.017041	-0.026289	-0.021739	-0.0042553	0.039899	0.016329	-0.038132	0.023883	0.019774	-0.024376	0.011113	0.003416	-0.07614	-0.048857	-0.027891	-0.036885	-0.022421	-0.004139	-0.022088	0.0026365	0.040795	0.030961	-8.56e-05	0.046432	0.065704	-0.03497	-0.014234	-0.0016267
6885	-0.020293	-0.014229	0.5705	-0.0061153	-0.021101	-0.0398	-0.023306	0.0026335	0.027276	0.0086327	-0.024874	-0.00216	-0.0042862	0.051546	-0.043654	-0.0059863	-0.015263	-0.015263	0.10579	0.0094175	-0.025473	0.022323	-0.032198	-0.018019	-0.0065077	0.036946	0.016674	-0.043699	0.0089705	0.016528	-0.024254	0.018258	0.0063415	-0.076784	-0.049458	-0.025036	-0.033559	-0.021046	0.00018962	-0.012661	0.0089171	0.045144	0.027661	-0.0025077	0.049242	0.080115	-0.035777	-0.011016	0.020726
7094	-0.022186	-0.018082	0.58478	-0.0062193	-0.025812	-0.038056	-0.018231	-0.00065809	0.027569	0.0039376	-0.024606	0.0043658	-0.010364	0.049409	-0.041411	-0.0059801	-0.015623	-0.015623	0.10408	-0.0039516	-0.02062	0.017415	-0.02578	-0.02138	-0.0045377	0.040421	0.016047	-0.038738	0.021345	0.019815	-0.025616	0.010627	0.0015856	-0.076643	-0.047809	-0.026446	-0.037576	-0.022928	-0.0040365	-0.021871	0.0018335	0.040769	0.032198	0.0009771	0.047186	0.064974	-0.034891	-0.014654	-0.002444
10010	-0.019405	-0.010845	0.54792	-0.0096536	-0.017208	-0.035423	-0.014989	0.0094341	0.022485	0.0044099	-0.015684	0.012938	-0.005935	0.047664	-0.040083	-0.014119	-0.017985	-0.017985	0.10119	0.0070698	-0.01649	0.019852	-0.020493	-0.025976	0.00096683	0.041476	0.01408	-0.036427	0.027269	0.012248	-0.017782	0.016801	0.001208	-0.077735	-0.038505	-0.025825	-0.023983	-0.012156	-0.012331	-0.0094222	-0.0043174	0.041588	0.048644	0.0036739	0.036929	0.059356	-0.034133	-0.02353	-0.014077
4137	-0.022262	-0.017902	0.57922	-0.0063846	-0.02512	-0.037874	-0.018558	0.00088184	0.027472	0.0049445	-0.023709	0.0058639	-0.0099365	0.04929	-0.041321	-0.0069566	-0.016256	-0.016256	0.10415	-0.0022849	-0.019149	0.017397	-0.025749	-0.020393	-0.0034684	0.041217	0.016546	-0.038264	0.021309	0.019057	-0.024424	0.011887	0.00069479	-0.076351	-0.046004	-0.025463	-0.036009	-0.021921	-0.0031636	-0.019824	0.001372	0.041025	0.034461	0.0019844	0.046073	0.066106	-0.034633	-0.014125	-0.00287
6900	-0.018451	-0.012253	0.54861	-0.01071	-0.015946	-0.036465	-0.01727	0.010937	0.021458	0.0036534	-0.016162	0.012516	-0.0053739	0.04756	-0.041197	-0.014813	-0.018586	-0.018586	0.099275	0.012314	-0.017226	0.018618	-0.022806	-0.025472	-0.00077971	0.043703	0.013342	-0.036918	0.02619	0.012251	-0.0177	0.01699	0.0071383	-0.075426	-0.039205	-0.026227	-0.022553	-0.012807	-0.012243	-0.0097934	-0.0032581	0.041523	0.04736	0.0016664	0.034838	0.063199	-0.033448	-0.023434	-0.013973
2783	-0.024134	-0.019249	0.58493	-0.0050713	-0.026936	-0.038352	-0.017926	-0.00082279	0.028673	0.005306	-0.024348	0.0043495	-0.0092045	0.052726	-0.040345	-0.0054441	-0.016795	-0.016795	0.10507	-0.0057283	-0.020196	0.017468	-0.026261	-0.019358	-0.0037688	0.041393	0.017097	-0.037959	0.020447	0.020538	-0.025418	0.012922	0.0011403	-0.076326	-0.047553	-0.023917	-0.038418	-0.023783	-0.00080249	-0.021242	0.0021956	0.042473	0.031008	0.00071354	0.045989	0.070216	-0.034753	-0.01278	0.00033015
6909	-0.02529	-0.025802	0.6165	-0.012134	-0.022294	-0.033218	-0.017603	-0.0042281	0.030628	0.0035488	-0.024819	0.0082691	-0.0033866	0.054729	-0.043013	-0.0076434	-0.01339	-0.01339	0.12486	-0.0028964	-0.014849	0.019835	-0.027936	-0.022127	-0.00072362	0.044282	0.018007	-0.033495	0.015663	0.016252	-0.023792	0.003633	0.00031914	-0.075951	-0.041597	-0.023595	-0.03398	-0.022022	0.0019194	-0.021638	0.0056422	0.044518	0.038626	0.0097071	0.044518	0.074739	-0.037555	-0.0027059	-0.010875
3172	-0.021058	-0.025766	0.58415	-0.0034788	-0.020889	-0.031135	-0.019777	0.0046703	0.027811	0.0054639	-0.0224	0.0096249	-0.0038953	0.054963	-0.042539	-0.0038431	-0.016502	-0.016502	0.11289	-0.0029211	-0.016828	0.014996	-0.028907	-0.01904	-0.0026874	0.044675	0.019584	-0.03085	0.023036	0.018254	-0.022652	0.010283	0.0058577	-0.066759	-0.04223	-0.019774	-0.02953	-0.019126	0.0066077	-0.021077	0.0073687	0.046235	0.032938	0.0020049	0.047226	0.087253	-0.034139	-0.0022325	-0.00066842
7015	-0.022996	-0.021758	0.58629	-0.0055492	-0.024607	-0.036687	-0.020892	0.0012483	0.02693	0.0062601	-0.023876	0.0037019	-0.008432	0.052262	-0.043257	-0.0057075	-0.016579	-0.016579	0.10625	-0.0032519	-0.019876	0.016567	-0.029945	-0.018531	-0.0043005	0.04095	0.017461	-0.037761	0.015597	0.019795	-0.024072	0.012928	0.0032521	-0.072966	-0.046592	-0.02287	-0.036194	-0.02317	0.0047985	-0.019871	0.0065384	0.04555	0.030935	0.00090119	0.047754	0.077664	-0.033046	-0.0076352	0.0028798
7031	-0.019405	-0.010845	0.54792	-0.0096536	-0.017208	-0.035423	-0.014989	0.0094341	0.022485	0.0044099	-0.015684	0.012938	-0.005935	0.047664	-0.040083	-0.014119	-0.017985	-0.017985	0.10119	0.0070698	-0.01649	0.019852	-0.020493	-0.025976	0.00096683	0.041476	0.01408	-0.036427	0.027269	0.012248	-0.017782	0.016801	0.001208	-0.077735	-0.038505	-0.025825	-0.023983	-0.012156	-0.012331	-0.0094222	-0.0043174	0.041588	0.048644	0.0036739	0.036929	0.059356	-0.034133	-0.02353	-0.014077
7032	-0.019405	-0.010845	0.54792	-0.0096536	-0.017208	-0.035423	-0.014989	0.0094341	0.022485	0.0044099	-0.015684	0.012938	-0.005935	0.047664	-0.040083	-0.014119	-0.017985	-0.017985	0.10119	0.0070698	-0.01649	0.019852	-0.020493	-0.025976	0.00096683	0.041476	0.01408	-0.036427	0.027269	0.012248	-0.017782	0.016801	0.001208	-0.077735	-0.038505	-0.025825	-0.023983	-0.012156	-0.012331	-0.0094222	-0.0043174	0.041588	0.048644	0.0036739	0.036929	0.059356	-0.034133	-0.02353	-0.014077
7040	-0.023715	-0.017363	0.57918	-0.0058523	-0.025827	-0.037659	-0.018511	0.001076	0.027611	0.0051386	-0.024747	0.0051501	-0.01028	0.049772	-0.040749	-0.0068065	-0.016675	-0.016675	0.1046	-0.0030679	-0.019756	0.016912	-0.026255	-0.021499	-0.0033184	0.040402	0.016585	-0.038001	0.02269	0.019116	-0.023625	0.011795	0.0019229	-0.076175	-0.04746	-0.026696	-0.035929	-0.021841	-0.0036639	-0.021197	0.0023896	0.040712	0.033164	0.001289	0.046005	0.066677	-0.034732	-0.013712	-0.0021232
7046	-0.020018	-0.011668	0.53403	-0.0078236	-0.021103	-0.038816	-0.018497	0.0056963	0.029891	0.0080608	-0.022546	0.0046669	-0.0079677	0.052053	-0.043912	-0.0075236	-0.013738	-0.013738	0.10181	0.011778	-0.01968	0.022539	-0.02486	-0.022565	0.0010088	0.041412	0.01902	-0.036859	0.013616	0.015488	-0.021922	0.016161	0.00093154	-0.078571	-0.044899	-0.028257	-0.030147	-0.016958	-0.0015733	-0.006061	0.00070493	0.04286	0.038566	0.0093705	0.05362	0.070533	-0.034802	-0.0084884	0.006732
7048	-0.020293	-0.012383	0.53845	-0.0065793	-0.022208	-0.03834	-0.017114	0.005556	0.030869	0.0076993	-0.022754	0.0062827	-0.01062	0.052378	-0.044475	-0.0073468	-0.014033	-0.014033	0.10218	0.0088878	-0.018073	0.020658	-0.023655	-0.024144	0.0013701	0.041964	0.018875	-0.035626	0.014893	0.016216	-0.022571	0.012974	0.00099102	-0.077636	-0.043837	-0.027495	-0.030226	-0.016973	-0.0023118	-0.0092462	-0.0003169	0.042333	0.040236	0.010544	0.054659	0.069108	-0.034772	-0.0074846	0.0019737
7049	-0.018321	-0.011607	0.5198	-0.008727	-0.023088	-0.038123	-0.014581	0.0051639	0.032101	0.0073805	-0.023002	0.0086004	-0.011686	0.053595	-0.046116	-0.0084079	-0.013388	-0.013388	0.10281	0.011152	-0.015094	0.021445	-0.019166	-0.025183	0.0063456	0.044065	0.020694	-0.032541	0.013219	0.015109	-0.021799	0.010917	-0.00066708	-0.078263	-0.041358	-0.029468	-0.029058	-0.015355	-0.00097102	-0.0061273	-0.0034835	0.041257	0.045798	0.019259	0.059294	0.066	-0.033211	-0.0038425	-0.0030532
9093	-0.023517	-0.016357	0.57303	-0.0053984	-0.025062	-0.03685	-0.018041	0.0027113	0.026765	0.0055415	-0.023826	0.0065092	-0.0099155	0.049737	-0.040231	-0.007095	-0.016553	-0.016553	0.1027	-0.0025543	-0.018949	0.01659	-0.025879	-0.021992	-0.0027029	0.039985	0.016317	-0.037747	0.024558	0.018354	-0.022636	0.013156	0.0028572	-0.076147	-0.046161	-0.027045	-0.033985	-0.020365	-0.0037596	-0.019149	0.0013304	0.040725	0.03445	0.00089186	0.045457	0.065922	-0.035052	-0.014677	-0.0030682
10499	-0.022184	-0.021584	0.58845	-0.0051286	-0.024443	-0.035232	-0.020123	-0.00059297	0.02961	0.0051847	-0.023961	0.0045133	-0.0074256	0.051623	-0.040699	-0.0038086	-0.015235	-0.015235	0.10401	-0.0051396	-0.020567	0.017882	-0.026388	-0.020265	-0.0052968	0.040778	0.018493	-0.034601	0.021323	0.020989	-0.025181	0.0097577	0.0033683	-0.073597	-0.046791	-0.022039	-0.036712	-0.023017	0.0020196	-0.024091	0.0043731	0.043292	0.029709	0.0013652	0.049813	0.072383	-0.034761	-0.010189	0.0031349
30851	-0.024055	-0.016155	0.58183	-0.0065283	-0.026258	-0.037643	-0.018054	-0.00019783	0.027051	0.0036418	-0.025564	0.0038443	-0.01098	0.049419	-0.040284	-0.0066508	-0.015796	-0.015796	0.10367	-0.003731	-0.021177	0.016886	-0.026228	-0.022855	-0.0041147	0.039272	0.015269	-0.039144	0.025767	0.019048	-0.023987	0.010741	0.0030512	-0.077779	-0.049558	-0.029851	-0.036772	-0.021948	-0.0072451	-0.021574	0.0014528	0.040186	0.031794	-0.00033192	0.045153	0.062653	-0.035529	-0.016775	-0.0036591
115000	-0.02379	-0.017571	0.56953	-0.004589	-0.024454	-0.037043	-0.017554	0.0038275	0.02572	0.006268	-0.02202	0.0071101	-0.0089597	0.050043	-0.040759	-0.0076289	-0.017162	-0.017162	0.10099	-0.0021079	-0.018044	0.016089	-0.026154	-0.019612	-0.0023885	0.04042	0.016463	-0.037227	0.021924	0.018312	-0.022533	0.014495	0.0017128	-0.075023	-0.045049	-0.025202	-0.033945	-0.020296	-0.0010314	-0.017453	0.0010192	0.043399	0.035512	0.0018099	0.045373	0.06801	-0.033267	-0.013294	-0.0036212
7097	-0.022657	-0.017675	0.58704	-0.010421	-0.028183	-0.04197	-0.016196	-0.0080364	0.031943	0.0060907	-0.026603	0.0047126	-0.011042	0.048779	-0.044609	-0.0078324	-0.013151	-0.013151	0.10927	-0.0012697	-0.019565	0.021341	-0.021312	-0.021073	-0.00055621	0.043631	0.018726	-0.039346	0.010944	0.020225	-0.029263	0.0077592	-0.0064658	-0.083671	-0.047686	-0.025462	-0.042311	-0.025084	-0.0014442	-0.018141	-0.0035102	0.039196	0.037665	0.014228	0.056068	0.061736	-0.034244	-0.0073736	-0.0069396
7098	-0.018102	-0.0055274	0.45591	-0.018957	-0.022644	-0.041605	-0.0048131	-0.0016124	0.042286	0.0071803	-0.021948	0.013833	-0.015451	0.052035	-0.050348	-0.013033	-0.0045285	-0.0045285	0.10809	0.020954	-0.0051685	0.025279	-0.0087738	-0.034609	0.019122	0.049028	0.020509	-0.025622	-0.004177	0.0093913	-0.022553	-0.0068504	-0.010914	-0.088281	-0.035113	-0.038048	-0.027489	-0.010689	-0.0090421	0.004339	-0.014246	0.036175	0.067462	0.047438	0.066167	0.045557	-0.033753	0.0046164	-0.035692
7099	-0.01906	-0.0096312	0.50647	-0.011654	-0.025422	-0.040266	-0.012398	0.001671	0.036009	0.0063649	-0.023136	0.0095889	-0.015017	0.053471	-0.04798	-0.0095989	-0.0099332	-0.0099332	0.10263	0.01129	-0.012578	0.021037	-0.016303	-0.027279	0.0098008	0.045626	0.020028	-0.030865	0.0094094	0.014767	-0.023625	0.0038417	-0.0044355	-0.081581	-0.04141	-0.03346	-0.031685	-0.015417	-0.0043091	-0.0054678	-0.0074916	0.039657	0.051668	0.02809	0.061966	0.057942	-0.033262	-0.0023731	-0.017909
10333	-0.023335	-0.013572	0.59611	-0.016817	-0.020113	-0.041064	-0.015998	-0.0012521	0.031431	0.0035705	-0.019105	0.013658	-0.0045907	0.049162	-0.04125	-0.016094	-0.014106	-0.014106	0.11166	0.0028245	-0.015997	0.025412	-0.019049	-0.026875	-0.0010041	0.041798	0.012812	-0.040303	0.015352	0.013975	-0.021838	0.0077535	-0.006739	-0.087085	-0.042135	-0.026471	-0.034929	-0.019207	-0.01207	-0.014271	-0.0051108	0.038585	0.049193	0.013629	0.039173	0.050984	-0.037118	-0.020712	-0.019757
51284	-0.026853	-0.019976	0.61596	-0.015296	-0.024125	-0.037741	-0.016049	-0.007145	0.029734	0.0033764	-0.026675	0.0040676	-0.0068679	0.051269	-0.040388	-0.0098076	-0.013547	-0.013547	0.12108	-0.003827	-0.017672	0.021237	-0.024339	-0.024193	-0.0030429	0.04072	0.014	-0.038245	0.012234	0.015951	-0.023883	0.0036326	-0.0040695	-0.083277	-0.046266	-0.028729	-0.037911	-0.02316	-0.0068964	-0.023898	0.0022904	0.040114	0.039888	0.0089644	0.044689	0.059181	-0.037469	-0.010147	-0.014065
54106	-0.023866	-0.020216	0.59907	-0.010027	-0.024183	-0.035245	-0.014585	-0.0026846	0.028994	0.0041672	-0.025866	0.0036851	-0.0082815	0.050862	-0.041409	-0.0079089	-0.015158	-0.015158	0.11305	-0.0050979	-0.019208	0.018148	-0.025439	-0.02398	-0.0048109	0.038676	0.013988	-0.035823	0.017296	0.017705	-0.022612	0.0074933	0.0058892	-0.07606	-0.045937	-0.028034	-0.034183	-0.020984	-0.0050381	-0.024562	0.0049518	0.040915	0.034303	0.0027541	0.048192	0.067725	-0.035593	-0.0084055	-0.0038049
7124	-0.022182	-0.019601	0.57445	-0.0037333	-0.023363	-0.035536	-0.019027	0.0036995	0.027398	0.0047708	-0.023697	0.0069891	-0.0092025	0.050631	-0.04156	-0.0063879	-0.017949	-0.017949	0.10362	-0.0021805	-0.018763	0.01537	-0.027247	-0.020592	-0.0039959	0.042393	0.017959	-0.035177	0.02419	0.018858	-0.02239	0.01283	0.0059279	-0.071497	-0.045198	-0.024876	-0.031987	-0.020266	-0.00094157	-0.020417	0.0036157	0.041805	0.033502	0.0001096	0.046433	0.080005	-0.034282	-0.010996	-0.00046433
4049	-0.018484	-0.01204	0.54677	-0.0070051	-0.015881	-0.033823	-0.013665	0.012059	0.022649	0.0043912	-0.014976	0.013431	-0.0056105	0.048709	-0.039984	-0.013339	-0.018446	-0.018446	0.099296	0.0079812	-0.015716	0.018832	-0.021009	-0.026204	0.0003271	0.040854	0.014537	-0.033893	0.02819	0.013404	-0.016567	0.016932	0.0034121	-0.073013	-0.037468	-0.024826	-0.020395	-0.010207	-0.010226	-0.00986	-0.0015489	0.042755	0.048145	0.0028456	0.038322	0.064399	-0.033562	-0.020429	-0.011323
7132	-0.019448	-0.011378	0.52063	-0.0086066	-0.026046	-0.040504	-0.013608	0.0009475	0.036	0.0060073	-0.023677	0.0082421	-0.014658	0.051213	-0.047027	-0.0071717	-0.010742	-0.010742	0.10243	0.0071044	-0.015505	0.019732	-0.019917	-0.027561	0.0052705	0.04545	0.019844	-0.031924	0.012462	0.01722	-0.024923	0.0040927	-0.0018306	-0.080627	-0.044711	-0.032787	-0.033484	-0.017713	-0.0050669	-0.0099604	-0.0046538	0.039875	0.045093	0.019492	0.059432	0.060252	-0.034337	-0.0043921	-0.012594
7133	-0.019405	-0.010845	0.54792	-0.0096536	-0.017208	-0.035423	-0.014989	0.0094341	0.022485	0.0044099	-0.015684	0.012938	-0.005935	0.047664	-0.040083	-0.014119	-0.017985	-0.017985	0.10119	0.0070698	-0.01649	0.019852	-0.020493	-0.025976	0.00096683	0.041476	0.01408	-0.036427	0.027269	0.012248	-0.017782	0.016801	0.001208	-0.077735	-0.038505	-0.025825	-0.023983	-0.012156	-0.012331	-0.0094222	-0.0043174	0.041588	0.048644	0.0036739	0.036929	0.059356	-0.034133	-0.02353	-0.014077
8658	-0.026121	-0.019046	0.59352	-0.0090863	-0.027796	-0.033752	-0.023886	-0.0015826	0.02546	0.0041265	-0.026694	0.003269	-0.012459	0.051259	-0.043153	-0.008526	-0.017237	-0.017237	0.10452	-0.0042349	-0.022191	0.017378	-0.030281	-0.01699	-0.0052807	0.037945	0.014298	-0.045245	0.013352	0.017495	-0.027065	0.01376	0.0039278	-0.078032	-0.049028	-0.024724	-0.038671	-0.023192	0.0023938	-0.023364	0.0051462	0.039543	0.025885	-0.0021301	0.04576	0.069005	-0.038819	-0.011686	0.0008275
10140	-0.023581	-0.017067	0.58188	-0.0055813	-0.026404	-0.037647	-0.018361	0.000112	0.027576	0.0041508	-0.025701	0.0039488	-0.01112	0.049759	-0.04054	-0.0058861	-0.015888	-0.015888	0.10354	-0.004447	-0.020842	0.016709	-0.026286	-0.021848	-0.0042815	0.039701	0.016063	-0.038242	0.02376	0.019671	-0.024393	0.010973	0.0033296	-0.076314	-0.049005	-0.028039	-0.037008	-0.022395	-0.0045494	-0.022277	0.0026879	0.040347	0.030981	-7.15e-05	0.04646	0.065173	-0.034965	-0.014474	-0.0017105
54472	-0.02071	-0.012671	0.53949	-0.009084	-0.025798	-0.038869	-0.014603	0.0014928	0.03146	0.005941	-0.024589	0.0081065	-0.012624	0.051497	-0.045156	-0.0086702	-0.01383	-0.01383	0.10446	0.0056091	-0.015984	0.01897	-0.020568	-0.025631	0.0045281	0.043652	0.018738	-0.034495	0.017147	0.016728	-0.023683	0.0073337	-0.00075852	-0.079735	-0.044431	-0.032198	-0.032761	-0.017592	-0.0047056	-0.011909	-0.0039234	0.040397	0.044061	0.016229	0.055473	0.061447	-0.034234	-0.0076302	-0.010987
7153	-0.022855	-0.020512	0.56851	-0.0047997	-0.0243	-0.033907	-0.018135	0.005587	0.027828	0.0071774	-0.017281	0.010728	-0.0043261	0.055126	-0.041227	-0.0065166	-0.01718	-0.01718	0.10589	-0.00035929	-0.013137	0.01741	-0.027042	-0.019226	0.00010658	0.045001	0.020105	-0.034476	0.02235	0.017661	-0.020627	0.015859	-0.00023368	-0.07324	-0.039936	-0.020144	-0.029956	-0.018183	0.0036272	-0.013198	0.0020828	0.051543	0.039907	0.0053883	0.043694	0.07772	-0.034237	-0.0091157	-0.0038415
5327	-0.025888	-0.019855	0.59075	-0.0017666	-0.028413	-0.039043	-0.015546	-0.0042388	0.030139	0.0038423	-0.025931	0.0088703	-0.012054	0.053467	-0.041207	-0.0064866	-0.015608	-0.015608	0.1039	-0.0071043	-0.021664	0.016779	-0.024763	-0.019716	-0.005342	0.041169	0.014409	-0.03894	0.019127	0.02413	-0.027263	0.017477	-0.00065948	-0.076984	-0.046822	-0.018418	-0.039787	-0.024022	-0.0018178	-0.021335	0.0025377	0.040228	0.030835	0.00055602	0.045593	0.066079	-0.035641	-0.013358	-0.0008297
8717	-0.023652	-0.016137	0.57758	-0.007205	-0.025058	-0.037821	-0.018206	0.0016021	0.026738	0.004789	-0.024202	0.0055662	-0.010008	0.049417	-0.040909	-0.0080367	-0.016429	-0.016429	0.1036	-0.0021417	-0.019841	0.017135	-0.026073	-0.022477	-0.0031334	0.040372	0.015442	-0.03899	0.022942	0.018341	-0.023224	0.01179	0.00288	-0.077495	-0.047171	-0.027729	-0.035237	-0.021127	-0.0055445	-0.019925	0.0010517	0.040327	0.034779	0.0013854	0.044519	0.064373	-0.034949	-0.015958	-0.004637
7185	-0.019405	-0.010845	0.54792	-0.0096536	-0.017208	-0.035423	-0.014989	0.0094341	0.022485	0.0044099	-0.015684	0.012938	-0.005935	0.047664	-0.040083	-0.014119	-0.017985	-0.017985	0.10119	0.0070698	-0.01649	0.019852	-0.020493	-0.025976	0.00096683	0.041476	0.01408	-0.036427	0.027269	0.012248	-0.017782	0.016801	0.001208	-0.077735	-0.038505	-0.025825	-0.023983	-0.012156	-0.012331	-0.0094222	-0.0043174	0.041588	0.048644	0.0036739	0.036929	0.059356	-0.034133	-0.02353	-0.014077
7186	-0.021511	-0.014532	0.54676	-0.0095426	-0.02486	-0.038654	-0.016189	0.0017213	0.03032	0.005922	-0.024522	0.0082105	-0.011544	0.053154	-0.044544	-0.0086557	-0.014298	-0.014298	0.10659	0.0056277	-0.01497	0.019108	-0.020616	-0.023931	0.0047724	0.043676	0.018458	-0.033787	0.015653	0.016128	-0.02285	0.0086812	7.83e-06	-0.078109	-0.043375	-0.030233	-0.032805	-0.018108	-0.0018282	-0.012486	-0.0026543	0.041438	0.043401	0.016242	0.052746	0.06474	-0.034018	-0.0075307	-0.010196
7187	-0.019687	-0.012637	0.5399	-0.0095602	-0.026956	-0.040679	-0.014237	-0.0023327	0.034115	0.0047531	-0.025895	0.006157	-0.013271	0.049832	-0.046855	-0.0073841	-0.012207	-0.012207	0.10544	0.0045795	-0.018078	0.020058	-0.020854	-0.026226	0.0031014	0.044633	0.018976	-0.035063	0.013749	0.018092	-0.026893	0.0033173	-0.0018438	-0.082526	-0.047238	-0.033571	-0.036587	-0.019661	-0.0068066	-0.013444	-0.0042026	0.039849	0.041898	0.016612	0.058829	0.059083	-0.035013	-0.0068496	-0.011178
7189	-0.024054	-0.018079	0.57498	-0.0055275	-0.026103	-0.037265	-0.019551	0.0020084	0.026902	0.0069574	-0.023342	0.006692	-0.0089936	0.050045	-0.04051	-0.0064774	-0.016971	-0.016971	0.10483	-0.0030596	-0.018375	0.016069	-0.026811	-0.02101	-0.0018662	0.041502	0.017231	-0.037799	0.021335	0.019134	-0.023547	0.014032	0.0013986	-0.075301	-0.045909	-0.024974	-0.034996	-0.021401	-0.0004715	-0.018717	0.0020562	0.042993	0.03393	0.0019042	0.044493	0.069664	-0.034384	-0.013188	-0.0012348
11181	-0.034856	-0.015417	0.71411	-0.020976	-0.024848	-0.059637	-0.010533	-0.031724	0.031424	0.0083586	-0.021854	0.00037019	-0.00056003	0.10218	-0.037056	-0.023752	-0.011641	-0.011641	0.11965	-0.014816	-0.024087	0.03476	-0.011741	-0.032336	-0.0070252	0.034397	-0.001652	-0.051099	-0.012046	0.015035	-0.036978	0.0011292	-0.01677	-0.095468	-0.046373	-0.014697	-0.056435	-0.033667	-0.010103	-0.027871	-0.010636	0.025898	0.049178	0.013839	0.015787	0.040598	-0.037148	-0.032421	-0.031338
7204	-0.019405	-0.010845	0.54792	-0.0096536	-0.017208	-0.035423	-0.014989	0.0094341	0.022485	0.0044099	-0.015684	0.012938	-0.005935	0.047664	-0.040083	-0.014119	-0.017985	-0.017985	0.10119	0.0070698	-0.01649	0.019852	-0.020493	-0.025976	0.00096683	0.041476	0.01408	-0.036427	0.027269	0.012248	-0.017782	0.016801	0.001208	-0.077735	-0.038505	-0.025825	-0.023983	-0.012156	-0.012331	-0.0094222	-0.0043174	0.041588	0.048644	0.0036739	0.036929	0.059356	-0.034133	-0.02353	-0.014077
7295	-0.019405	-0.010845	0.54792	-0.0096536	-0.017208	-0.035423	-0.014989	0.0094341	0.022485	0.0044099	-0.015684	0.012938	-0.005935	0.047664	-0.040083	-0.014119	-0.017985	-0.017985	0.10119	0.0070698	-0.01649	0.019852	-0.020493	-0.025976	0.00096683	0.041476	0.01408	-0.036427	0.027269	0.012248	-0.017782	0.016801	0.001208	-0.077735	-0.038505	-0.025825	-0.023983	-0.012156	-0.012331	-0.0094222	-0.0043174	0.041588	0.048644	0.0036739	0.036929	0.059356	-0.034133	-0.02353	-0.014077
7001	-0.029348	-0.023334	0.69035	-0.021182	-0.029453	-0.054993	-0.015424	-0.033118	0.024203	0.012051	-0.032664	-0.0041308	-0.0066217	0.038984	-0.042488	-0.014089	-0.011979	-0.011979	0.13832	-0.014396	-0.019339	0.025604	-0.024292	-0.027216	-0.002276	0.039841	0.012388	-0.049403	-0.012414	0.020842	-0.038784	-0.0050291	-0.016202	-0.096549	-0.048203	-0.024547	-0.057405	-0.037614	-0.0019342	-0.032477	-0.0096739	0.026727	0.029659	0.015678	0.040954	0.042164	-0.035402	-0.013217	-0.016102
7248	-0.023772	-0.015364	0.5789	-0.0068405	-0.025426	-0.037332	-0.017703	0.0007457	0.026461	0.003849	-0.0251	0.0044632	-0.011051	0.048946	-0.040361	-0.0074336	-0.016008	-0.016008	0.1032	-0.003475	-0.020872	0.017238	-0.025637	-0.023098	-0.0036186	0.039256	0.015084	-0.039197	0.024986	0.018511	-0.023519	0.010916	0.002605	-0.077907	-0.048413	-0.029417	-0.03569	-0.021214	-0.0075473	-0.021135	0.00092154	0.03933	0.033348	2.42e-05	0.044631	0.061941	-0.035618	-0.017458	-0.00467
7249	-0.024851	-0.01961	0.5821	-0.0050877	-0.025919	-0.038298	-0.019237	-0.00039168	0.024156	0.003905	-0.025588	0.0049135	-0.010898	0.048974	-0.041918	-0.0070813	-0.017264	-0.017264	0.11108	-0.0051916	-0.020835	0.014466	-0.026684	-0.020281	-0.0033642	0.039844	0.015242	-0.037932	0.020088	0.018837	-0.023403	0.012087	0.001563	-0.075334	-0.047604	-0.026457	-0.036872	-0.022309	-0.00021414	-0.020977	0.00041912	0.042124	0.032657	0.00047806	0.055856	0.064685	-0.034156	-0.0041193	-0.0017628
7057	-0.023851	-0.016301	0.57413	-0.0079548	-0.023622	-0.035481	-0.018745	0.0029934	0.027094	0.0052045	-0.022571	0.0062538	-0.010415	0.049913	-0.041777	-0.0080877	-0.016909	-0.016909	0.10205	-0.0013086	-0.019087	0.017815	-0.025146	-0.01912	-0.0028022	0.041024	0.015635	-0.039999	0.021117	0.017953	-0.024093	0.013536	0.0012184	-0.077392	-0.045611	-0.023895	-0.034421	-0.020123	-0.0029521	-0.018462	0.00095087	0.039641	0.033799	0.0010819	0.045812	0.065959	-0.036173	-0.014283	-0.0030723
7275	0	0	0	0	0	0	0	0	0	0	0	0	0	0	0	0	0	0	0	0	0	0	0	0	0	0	0	0	0	0	0	0	0	0	0	0	0	0	0	0	0	0	0	0	0	0	0	0	0
7291	-0.021086	-0.022517	0.58209	-0.0034821	-0.022657	-0.034726	-0.020422	0.0033332	0.028252	0.0043692	-0.024143	0.0076007	-0.005684	0.053332	-0.041568	-0.0040866	-0.016856	-0.016856	0.10907	-0.0034172	-0.018845	0.015612	-0.027712	-0.019668	-0.0030022	0.043808	0.019496	-0.032842	0.024573	0.018751	-0.02336	0.010837	0.005517	-0.070002	-0.044784	-0.022712	-0.031996	-0.020667	0.0025731	-0.022474	0.0053921	0.04238	0.031891	0.00049521	0.047561	0.081056	-0.034506	-0.0072123	-0.00019535
2793	-0.021815	-0.012368	0.58732	-0.021594	-0.028574	-0.051313	-0.006764	-0.023425	0.037603	0.0058828	-0.028067	0.0052822	-0.0081702	0.046696	-0.049018	-0.013378	-0.0085918	-0.0085918	0.12311	0.0032182	-0.01651	0.031728	-0.011847	-0.028616	0.0080772	0.049444	0.018073	-0.04125	-0.010521	0.017644	-0.036746	-0.0068957	-0.019641	-0.10223	-0.044467	-0.031428	-0.048138	-0.026986	-0.010383	-0.010482	-0.018061	0.032541	0.05313	0.035749	0.058617	0.038279	-0.036752	-0.0044745	-0.027474
7297	-0.022863	-0.0090079	0.61261	-0.0096478	-0.016049	-0.039555	-0.020506	0.0047363	0.021458	0.010994	-0.024279	-0.0067333	-0.0015071	0.051597	-0.040792	-0.013104	-0.014597	-0.014597	0.10383	0.0089415	-0.026632	0.02549	-0.032185	-0.026721	-0.0096013	0.028874	0.0079158	-0.04671	0.0052744	0.010802	-0.019662	0.019174	0.013041	-0.076027	-0.048524	-0.03003	-0.029039	-0.019118	-0.006799	-0.012917	0.010401	0.040422	0.031018	-0.005907	0.035539	0.077502	-0.037974	-0.020531	0.021967
7314	-0.023615	-0.019085	0.59146	-0.00571	-0.027073	-0.03881	-0.019838	-0.0018439	0.027806	0.0043833	-0.025835	0.0029333	-0.0099059	0.051474	-0.041121	-0.0049124	-0.015326	-0.015326	0.10687	-0.0059845	-0.021422	0.017271	-0.02672	-0.021628	-0.0039796	0.040353	0.016146	-0.038149	0.018991	0.020572	-0.025902	0.010329	0.002857	-0.075442	-0.050132	-0.026618	-0.039223	-0.024215	-0.0016835	-0.023485	0.0046052	0.041704	0.029066	0.00011679	0.045764	0.06824	-0.034732	-0.013314	-0.00033947
9040	-0.023193	-0.022077	0.60248	-0.0054023	-0.02749	-0.039343	-0.021432	-0.0032667	0.028694	0.0056414	-0.025413	0.0026436	-0.0090052	0.053621	-0.041792	-0.0031612	-0.014735	-0.014735	0.10849	-0.0077847	-0.021261	0.017557	-0.027232	-0.020015	-0.0042679	0.041757	0.017039	-0.037673	0.013645	0.022428	-0.028087	0.010452	0.0010989	-0.073606	-0.049901	-0.022135	-0.041337	-0.026232	0.0046204	-0.024509	0.0068941	0.043657	0.027218	0.0008416	0.047183	0.074554	-0.034156	-0.0096358	0.002696
7409	-0.021574	-0.02427	0.59655	-0.0046624	-0.024767	-0.036209	-0.02156	-0.0023407	0.026115	0.0025684	-0.026949	0.0056607	-0.0061174	0.05276	-0.041709	-0.0033225	-0.016974	-0.016974	0.12609	-0.0075569	-0.021186	0.014431	-0.027358	-0.019769	-0.003411	0.043201	0.018561	-0.035028	0.021082	0.020145	-0.024161	0.0069109	0.0017076	-0.071966	-0.048483	-0.023911	-0.036636	-0.022477	0.005163	-0.026037	0.0034614	0.042434	0.027906	0.001527	0.067722	0.074011	-0.034664	0.014104	0.0016835
7410	-0.019405	-0.010845	0.54792	-0.0096536	-0.017208	-0.035423	-0.014989	0.0094341	0.022485	0.0044099	-0.015684	0.012938	-0.005935	0.047664	-0.040083	-0.014119	-0.017985	-0.017985	0.10119	0.0070698	-0.01649	0.019852	-0.020493	-0.025976	0.00096683	0.041476	0.01408	-0.036427	0.027269	0.012248	-0.017782	0.016801	0.001208	-0.077735	-0.038505	-0.025825	-0.023983	-0.012156	-0.012331	-0.0094222	-0.0043174	0.041588	0.048644	0.0036739	0.036929	0.059356	-0.034133	-0.02353	-0.014077
7414	-0.023097	-0.015587	0.5749	-0.0063482	-0.024566	-0.037047	-0.017611	0.002331	0.026619	0.0043683	-0.023982	0.006062	-0.010536	0.049036	-0.040516	-0.0074193	-0.016487	-0.016487	0.10211	-0.0026559	-0.019907	0.017157	-0.025152	-0.022463	-0.003154	0.040379	0.015873	-0.038253	0.02531	0.018472	-0.023069	0.012538	0.002588	-0.076765	-0.046825	-0.027362	-0.034044	-0.020414	-0.0060099	-0.019858	0.0010477	0.039725	0.034572	0.00042683	0.045007	0.063751	-0.035014	-0.016419	-0.00406
7422	-0.023856	-0.018193	0.59147	-0.0069083	-0.025065	-0.039811	-0.015141	-0.0022194	0.027336	0.0063298	-0.023991	0.0057938	-0.010212	0.047826	-0.041932	-0.0087987	-0.016598	-0.016598	0.10494	-0.0040444	-0.019825	0.019342	-0.022987	-0.021751	-0.003562	0.04071	0.016288	-0.039813	0.018011	0.019835	-0.025009	0.012094	-6.42e-05	-0.0794	-0.046053	-0.02325	-0.037419	-0.023039	-0.0024654	-0.019475	-0.00014453	0.039423	0.035374	0.0044231	0.048116	0.064149	-0.033762	-0.012249	-0.0021906
3791	-0.018824	-0.0092358	0.53609	-0.0060416	-0.019775	-0.039568	-0.0197	0.006554	0.02992	0.0094098	-0.023271	0.0028946	-0.010602	0.051418	-0.046855	-0.008351	-0.014295	-0.014295	0.10253	0.016486	-0.020369	0.022322	-0.027452	-0.024985	-0.00024008	0.040323	0.016899	-0.039222	0.0093998	0.014175	-0.023539	0.014693	0.0029586	-0.07914	-0.044351	-0.028061	-0.028348	-0.015474	-0.0025805	-0.0045419	0.00072227	0.043403	0.040857	0.0091824	0.05501	0.072686	-0.036778	-0.0073114	0.01171
8825	-0.02376	-0.016509	0.58169	-0.0061031	-0.026295	-0.037665	-0.018139	-2.23e-06	0.0271	0.003835	-0.025713	0.003795	-0.011112	0.049492	-0.040456	-0.0064067	-0.01586	-0.01586	0.10355	-0.0043136	-0.021107	0.016853	-0.026157	-0.022466	-0.0041754	0.039431	0.015571	-0.038649	0.02425	0.019303	-0.024187	0.010612	0.0033389	-0.077026	-0.049118	-0.028972	-0.036825	-0.022195	-0.0059466	-0.022188	0.0020729	0.039903	0.031457	-0.00020153	0.045836	0.063672	-0.035264	-0.015709	-0.0028648
7430	-0.02284	-0.015767	0.57759	-0.0065075	-0.026001	-0.037495	-0.018258	0.00033987	0.027211	0.0038753	-0.025315	0.0044787	-0.01141	0.048825	-0.040424	-0.0071158	-0.016045	-0.016045	0.10264	-0.0031211	-0.020533	0.01755	-0.024888	-0.02229	-0.004278	0.039565	0.015572	-0.039255	0.02476	0.019096	-0.023691	0.011567	0.0029045	-0.077852	-0.048306	-0.027476	-0.036477	-0.021542	-0.0067841	-0.021094	0.0010191	0.039256	0.032768	0.00036412	0.04569	0.062302	-0.035263	-0.017187	-0.0034043
7436	-0.020816	-0.018203	0.56511	-0.0068585	-0.030577	-0.043171	-0.019106	-0.013124	0.030243	0.0018077	-0.029937	0.0034516	-0.015018	0.037622	-0.045967	-0.0031814	-0.018268	-0.018268	0.11099	-0.0035595	-0.025637	0.018198	-0.028239	-0.016591	-0.0050654	0.044038	0.021042	-0.04465	0.019841	0.02595	-0.034744	0.0074221	-0.0073093	-0.089621	-0.052665	-0.023921	-0.045731	-0.025644	-0.0082629	-0.023281	-0.0035421	0.038399	0.028726	0.0013626	0.058433	0.057281	-0.035647	-0.014255	0.0022573
7434	-0.0090121	0.0026144	0.32471	-0.02082	-0.016852	-0.045577	0.0087032	0.0056939	0.045607	0.0083724	-0.0097229	0.023138	-0.0092538	0.045477	-0.050203	-0.01958	-0.0034107	-0.0034107	0.093802	0.038923	0.0059726	0.026463	0.0022379	-0.041407	0.03095	0.053108	0.022264	-0.010814	-0.019287	0.0075841	-0.015686	-0.011439	-0.017159	-0.08625	-0.023061	-0.033757	-0.020884	-0.0037631	-0.0095621	0.019934	-0.022091	0.027453	0.089263	0.067042	0.063923	0.026911	-0.024676	0.0066405	-0.054569
8936	0	0	0	0	0	0	0	0	0	0	0	0	0	0	0	0	0	0	0	0	0	0	0	0	0	0	0	0	0	0	0	0	0	0	0	0	0	0	0	0	0	0	0	0	0	0	0	0	0
10163	-0.019405	-0.010845	0.54792	-0.0096536	-0.017208	-0.035423	-0.014989	0.0094341	0.022485	0.0044099	-0.015684	0.012938	-0.005935	0.047664	-0.040083	-0.014119	-0.017985	-0.017985	0.10119	0.0070698	-0.01649	0.019852	-0.020493	-0.025976	0.00096683	0.041476	0.01408	-0.036427	0.027269	0.012248	-0.017782	0.016801	0.001208	-0.077735	-0.038505	-0.025825	-0.023983	-0.012156	-0.012331	-0.0094222	-0.0043174	0.041588	0.048644	0.0036739	0.036929	0.059356	-0.034133	-0.02353	-0.014077
10810	0	0	0	0	0	0	0	0	0	0	0	0	0	0	0	0	0	0	0	0	0	0	0	0	0	0	0	0	0	0	0	0	0	0	0	0	0	0	0	0	0	0	0	0	0	0	0	0	0
11197	0	0	0	0	0	0	0	0	0	0	0	0	0	0	0	0	0	0	0	0	0	0	0	0	0	0	0	0	0	0	0	0	0	0	0	0	0	0	0	0	0	0	0	0	0	0	0	0	0
7471	-0.021759	-0.020184	0.57539	-0.0034565	-0.023427	-0.034867	-0.018353	0.0038987	0.028141	0.0051575	-0.023226	0.0077223	-0.0092347	0.051564	-0.041017	-0.0051285	-0.017073	-0.017073	0.10311	-0.0030947	-0.01889	0.015882	-0.026451	-0.020336	-0.0039761	0.042395	0.018689	-0.034306	0.024543	0.020009	-0.022607	0.013094	0.0048341	-0.070231	-0.044603	-0.02302	-0.031796	-0.019953	0.00058713	-0.020501	0.0049496	0.042757	0.03251	0.00043639	0.048277	0.079208	-0.034019	-0.0092258	0.00089816
9049	-0.020363	-0.013873	0.54359	-0.0094533	-0.023672	-0.036918	-0.015657	0.0024406	0.030684	0.005589	-0.023409	0.008469	-0.011096	0.053156	-0.044269	-0.0085641	-0.013545	-0.013545	0.10397	0.0055338	-0.015655	0.019821	-0.019716	-0.02546	0.0042169	0.043156	0.018953	-0.033105	0.018648	0.015794	-0.022432	0.0077069	0.00015472	-0.078609	-0.042577	-0.030388	-0.031234	-0.016839	-0.0034347	-0.012435	-0.0037917	0.04099	0.044459	0.016108	0.054495	0.062728	-0.034443	-0.0088625	-0.010432
7498	-0.031525	-0.020998	0.70326	-0.013693	-0.020789	-0.042565	-0.017581	-0.0045369	0.021717	0.010697	-0.0209	-0.0011391	0.00037319	0.050861	-0.036777	-0.012989	-0.010071	-0.010071	0.10515	-0.012733	-0.019689	0.024543	-0.023451	-0.029668	-0.0077566	0.037128	0.0082936	-0.041077	0.003136	0.015888	-0.026541	0.0049345	-0.00069207	-0.078583	-0.049008	-0.028922	-0.042204	-0.028934	-0.0039702	-0.028421	0.00018208	0.037826	0.034103	0.0040712	0.029088	0.062677	-0.034803	-0.021223	-0.017236
331	-0.022107	-0.021499	0.59256	-0.0055358	-0.0274	-0.039513	-0.020855	-0.0025771	0.028222	0.0050019	-0.025183	0.0032536	-0.0099643	0.050706	-0.041894	-0.0042171	-0.01507	-0.01507	0.10618	-0.0066363	-0.021942	0.017301	-0.027062	-0.019565	-0.0053247	0.041042	0.017125	-0.037759	0.016413	0.02168	-0.02709	0.010657	0.00028664	-0.074522	-0.050052	-0.022859	-0.040245	-0.025463	0.0013643	-0.023443	0.0063143	0.043	0.02695	0.0010994	0.04736	0.071492	-0.034089	-0.010207	0.0021198
7535	-0.020845	-0.013363	0.57194	-0.0055302	-0.020933	-0.039506	-0.023266	0.0049303	0.025868	0.0079979	-0.024108	-0.0012005	-0.0039676	0.051378	-0.04121	-0.0055622	-0.015774	-0.015774	0.10288	0.0089246	-0.024554	0.022486	-0.031264	-0.017827	-0.0061673	0.036804	0.015438	-0.042555	0.014794	0.01644	-0.023621	0.021107	0.0053331	-0.07578	-0.048777	-0.024658	-0.033269	-0.020102	0.00025762	-0.010495	0.0080954	0.044691	0.028215	-0.0027181	0.04664	0.079089	-0.035678	-0.011548	0.021905
6935	-0.020786	-0.025258	0.59078	-0.0039091	-0.023438	-0.034485	-0.022102	0.00011439	0.030846	0.0050986	-0.023677	0.0056249	-0.0057757	0.054038	-0.041326	-0.0019911	-0.015733	-0.015733	0.10628	-0.0052884	-0.019901	0.017036	-0.028266	-0.018371	-0.0054424	0.043622	0.020728	-0.03141	0.020533	0.021261	-0.025236	0.0097722	0.0056434	-0.06966	-0.045335	-0.019322	-0.035828	-0.023588	0.0072248	-0.024751	0.0065957	0.045208	0.028385	0.0015245	0.051782	0.084441	-0.033831	-0.0050859	0.0052237
134	-0.019405	-0.010845	0.54792	-0.0096536	-0.017208	-0.035423	-0.014989	0.0094341	0.022485	0.0044099	-0.015684	0.012938	-0.005935	0.047664	-0.040083	-0.014119	-0.017985	-0.017985	0.10119	0.0070698	-0.01649	0.019852	-0.020493	-0.025976	0.00096683	0.041476	0.01408	-0.036427	0.027269	0.012248	-0.017782	0.016801	0.001208	-0.077735	-0.038505	-0.025825	-0.023983	-0.012156	-0.012331	-0.0094222	-0.0043174	0.041588	0.048644	0.0036739	0.036929	0.059356	-0.034133	-0.02353	-0.014077
135	-0.024326	-0.016876	0.58045	-0.005999	-0.026591	-0.037961	-0.018764	-0.000112	0.026874	0.0045204	-0.02606	0.0037515	-0.010795	0.048875	-0.04039	-0.0068498	-0.01664	-0.01664	0.10536	-0.003499	-0.020896	0.016349	-0.027009	-0.022125	-0.0033884	0.039539	0.015746	-0.03872	0.024199	0.018542	-0.023902	0.01096	0.0031039	-0.077093	-0.049165	-0.029563	-0.036726	-0.022267	-0.005976	-0.022354	0.0017447	0.039856	0.032053	-1.93e-05	0.044901	0.064155	-0.035244	-0.015677	-0.0028414
8	0	0	0	0	0	0	0	0	0	0	0	0	0	0	0	0	0	0	0	0	0	0	0	0	0	0	0	0	0	0	0	0	0	0	0	0	0	0	0	0	0	0	0	0	0	0	0	0	0
26	-0.022842	-0.020154	0.54009	-0.013179	-0.046725	-0.058567	-0.01888	-0.056439	0.025435	-0.0067748	-0.045525	0.00030648	-0.031852	0.0056039	-0.059986	-0.0041114	-0.022776	-0.022776	0.13277	-0.0039065	-0.03664	0.018907	-0.029446	-0.010759	-0.0068227	0.04995	0.029777	-0.062899	0.021395	0.040849	-0.063513	-0.0083521	-0.030172	-0.12744	-0.062832	-0.02374	-0.076405	-0.037128	-0.020242	-0.030287	-0.023048	0.022406	0.017551	0.0037652	0.079137	0.018163	-0.036898	-0.012199	0.0026559
107	-0.02688	-0.023194	0.64842	-0.0084442	-0.026078	-0.041158	-0.018007	-0.0065406	0.028141	0.0085238	-0.02394	0.00012422	-0.0032349	0.057063	-0.038401	-0.0065253	-0.012699	-0.012699	0.1084	-0.011977	-0.021539	0.021918	-0.024878	-0.021422	-0.0064426	0.040502	0.013984	-0.04061	0.0088324	0.021891	-0.028821	0.011336	-0.0017666	-0.076881	-0.05028	-0.020372	-0.044724	-0.030263	0.0031434	-0.026213	0.0048319	0.041523	0.0271	0.0010769	0.038956	0.074606	-0.035134	-0.014804	-0.0016073
108	-0.035671	-0.023898	0.73929	-0.023206	-0.024953	-0.056594	-0.011346	-0.034766	0.025918	0.010484	-0.026264	-0.0058359	0.0055647	0.053543	-0.034756	-0.01661	-0.0076557	-0.0076557	0.1251	-0.018643	-0.02227	0.034686	-0.016711	-0.027608	-0.0057388	0.039692	0.0059556	-0.050477	-0.015156	0.018516	-0.036024	0.0012468	-0.018964	-0.095008	-0.05254	-0.021166	-0.056957	-0.039683	-0.0073021	-0.030202	-0.0083869	0.026564	0.034569	0.012516	0.023227	0.04304	-0.037482	-0.02737	-0.021639
111	-0.035671	-0.023898	0.73929	-0.023206	-0.024953	-0.056594	-0.011346	-0.034766	0.025918	0.010484	-0.026264	-0.0058359	0.0055647	0.053543	-0.034756	-0.01661	-0.0076557	-0.0076557	0.1251	-0.018643	-0.02227	0.034686	-0.016711	-0.027608	-0.0057388	0.039692	0.0059556	-0.050477	-0.015156	0.018516	-0.036024	0.0012468	-0.018964	-0.095008	-0.05254	-0.021166	-0.056957	-0.039683	-0.0073021	-0.030202	-0.0083869	0.026564	0.034569	0.012516	0.023227	0.04304	-0.037482	-0.02737	-0.021639
2261	-0.019707	-0.0095481	0.54312	-0.0066905	-0.02067	-0.039666	-0.019803	0.0061536	0.029194	0.0085647	-0.023642	0.0022812	-0.0097324	0.051956	-0.045624	-0.0082961	-0.014424	-0.014424	0.10288	0.0141	-0.020863	0.021939	-0.027861	-0.024515	-0.00085987	0.039653	0.016436	-0.039592	0.011261	0.014179	-0.022923	0.014848	0.0043974	-0.078593	-0.045114	-0.029055	-0.028993	-0.016159	-0.0036345	-0.0066279	0.0014343	0.043369	0.039224	0.0071548	0.052477	0.072081	-0.036437	-0.0092249	0.011268
281000	0	0	0	0	0	0	0	0	0	0	0	0	0	0	0	0	0	0	0	0	0	0	0	0	0	0	0	0	0	0	0	0	0	0	0	0	0	0	0	0	0	0	0	0	0	0	0	0	0
162	-0.023041	-0.020159	0.58801	-0.0098349	-0.034849	-0.049739	-0.01908	-0.025871	0.029744	-0.00061556	-0.035951	-0.0031538	-0.015586	0.02996	-0.046626	-0.0034189	-0.018955	-0.018955	0.11993	-0.0085403	-0.030873	0.019851	-0.029457	-0.017695	-0.0067856	0.042495	0.020324	-0.052081	0.014574	0.027649	-0.041718	-0.00035927	-0.011803	-0.099759	-0.059393	-0.027377	-0.056859	-0.032431	-0.01476	-0.029824	-0.0076371	0.034015	0.022987	0.0014797	0.061227	0.045528	-0.036726	-0.017397	0.001344
118	-0.02218	-0.014901	0.56456	-0.0057269	-0.023486	-0.037619	-0.017461	0.0037221	0.023316	0.0042768	-0.022053	0.0064194	-0.010589	0.048037	-0.041049	-0.010198	-0.017157	-0.017157	0.099553	-0.00065402	-0.019318	0.017312	-0.02425	-0.022075	-0.0027804	0.038511	0.013526	-0.039545	0.024	0.015728	-0.021448	0.013564	0.0022442	-0.078165	-0.04477	-0.027836	-0.033273	-0.018446	-0.0079717	-0.016784	-0.0020606	0.040738	0.038313	0.00069941	0.04246	0.060774	-0.034135	-0.020681	-0.009352
952	0	0	0	0	0	0	0	0	0	0	0	0	0	0	0	0	0	0	0	0	0	0	0	0	0	0	0	0	0	0	0	0	0	0	0	0	0	0	0	0	0	0	0	0	0	0	0	0	0
9495	-0.024011	-0.016298	0.57873	-0.0063045	-0.025756	-0.037273	-0.018103	0.00081643	0.026728	0.0045232	-0.025235	0.0046547	-0.010949	0.049071	-0.040467	-0.0070629	-0.016412	-0.016412	0.10392	-0.0034034	-0.020566	0.016761	-0.02616	-0.022377	-0.0033724	0.039573	0.015649	-0.038693	0.024641	0.018624	-0.023511	0.011369	0.0028031	-0.077117	-0.048152	-0.028777	-0.035651	-0.021374	-0.0060976	-0.021376	0.0013869	0.039761	0.033082	9.01e-05	0.045066	0.063788	-0.035375	-0.01612	-0.0033436
148	-0.014367	0.007488	0.2641	-0.02144	-0.016765	-0.046348	0.014048	0.014093	0.035478	0.0079364	-0.0074843	0.028648	-0.015005	0.049849	-0.045501	-0.027986	-0.0073589	-0.0073589	0.078316	0.032818	0.018106	0.019738	0.0081631	-0.043243	0.038974	0.049479	0.017715	-0.0091674	-0.02242	-0.00042039	-0.0081188	-0.011179	-0.017346	-0.082817	-0.01439	-0.034692	-0.016226	0.0024673	-0.0043588	0.024843	-0.02541	0.025347	0.10226	0.076131	0.057119	0.022342	-0.017055	0.0070179	-0.068355
150	-0.024987	-0.0081378	0.49351	-0.010251	-0.024275	-0.039219	-0.0099386	0.010832	0.027086	0.0089172	-0.020116	0.015568	-0.015284	0.056723	-0.041323	-0.01507	-0.015296	-0.015296	0.095196	0.0072612	-0.003904	0.01558	-0.013987	-0.026918	0.014391	0.041693	0.017237	-0.030113	0.01299	0.0099407	-0.015199	0.010724	-0.0028421	-0.076578	-0.032213	-0.030401	-0.026593	-0.010783	0.0026686	-0.0018148	-0.0087599	0.039659	0.060572	0.030251	0.05174	0.056598	-0.027772	-0.0048304	-0.024335
1139	-0.018907	-0.013649	0.46708	-0.012205	-0.041227	-0.056551	-0.014416	-0.037002	0.030155	-0.0052783	-0.033959	0.0044051	-0.032397	0.017826	-0.062294	-0.0064065	-0.016525	-0.016525	0.12116	0.0065208	-0.030267	0.017774	-0.026069	-0.019306	0.0017998	0.049723	0.026545	-0.050446	0.026939	0.033879	-0.049749	-0.0090841	-0.026084	-0.11748	-0.059424	-0.032794	-0.063237	-0.028355	-0.021958	-0.016885	-0.022244	0.029898	0.035599	0.01595	0.079823	0.028776	-0.030414	-0.011374	-0.0067712
89	-0.022883	-0.018774	0.58308	-0.0049688	-0.025316	-0.039103	-0.017994	0.0004005	0.026089	0.0045053	-0.023939	0.0040425	-0.010591	0.049051	-0.042701	-0.0068177	-0.016571	-0.016571	0.10285	-0.0042143	-0.020273	0.016325	-0.026832	-0.020896	-0.0046122	0.03971	0.015081	-0.039025	0.019186	0.0193	-0.025566	0.010858	0.0021789	-0.076055	-0.047414	-0.026345	-0.037351	-0.022789	-0.0027119	-0.021195	0.0016405	0.041991	0.033049	0.00075243	0.046461	0.066091	-0.033646	-0.014076	-0.0033606
1495	-0.023277	-0.015434	0.57483	-0.0065985	-0.024528	-0.03701	-0.017562	0.0023581	0.026466	0.0043162	-0.024081	0.0059893	-0.010571	0.04908	-0.040461	-0.0076767	-0.016478	-0.016478	0.10228	-0.0025963	-0.020027	0.017258	-0.025153	-0.022581	-0.0031004	0.040278	0.015757	-0.038492	0.025363	0.018298	-0.02289	0.012118	0.0025999	-0.077028	-0.046925	-0.028005	-0.03403	-0.020282	-0.0065185	-0.019866	0.00082892	0.039719	0.034711	0.00038981	0.044713	0.063382	-0.035201	-0.016784	-0.0043985
29091	0	0	0	0	0	0	0	0	0	0	0	0	0	0	0	0	0	0	0	0	0	0	0	0	0	0	0	0	0	0	0	0	0	0	0	0	0	0	0	0	0	0	0	0	0	0	0	0	0
2890	-0.01569	-0.014007	0.45118	-0.0098016	-0.040191	-0.052422	-0.014602	-0.029422	0.034573	-0.0023653	-0.034477	0.0039581	-0.029439	0.023053	-0.062063	-0.0039572	-0.01674	-0.01674	0.11244	0.0089423	-0.030417	0.017893	-0.025999	-0.021401	0.00084736	0.04951	0.027448	-0.044811	0.01903	0.030724	-0.047749	-0.0096302	-0.020801	-0.10924	-0.060515	-0.034265	-0.05855	-0.026834	-0.020124	-0.014897	-0.016489	0.031085	0.032926	0.018118	0.085693	0.040223	-0.034629	-0.0044516	-0.0044707
273	-0.019405	-0.010845	0.54792	-0.0096536	-0.017208	-0.035423	-0.014989	0.0094341	0.022485	0.0044099	-0.015684	0.012938	-0.005935	0.047664	-0.040083	-0.014119	-0.017985	-0.017985	0.10119	0.0070698	-0.01649	0.019852	-0.020493	-0.025976	0.00096683	0.041476	0.01408	-0.036427	0.027269	0.012248	-0.017782	0.016801	0.001208	-0.077735	-0.038505	-0.025825	-0.023983	-0.012156	-0.012331	-0.0094222	-0.0043174	0.041588	0.048644	0.0036739	0.036929	0.059356	-0.034133	-0.02353	-0.014077
286	-0.022911	-0.019745	0.60399	-0.007943	-0.026856	-0.041516	-0.017611	-0.0063822	0.02804	0.0053174	-0.025957	0.0039977	-0.0095175	0.04723	-0.041966	-0.0070035	-0.015795	-0.015795	0.10968	-0.0046097	-0.020646	0.019425	-0.024438	-0.020989	-0.0041273	0.041751	0.016667	-0.040903	0.016218	0.020537	-0.028538	0.0095692	-0.0026489	-0.080705	-0.048238	-0.024768	-0.041326	-0.025861	-0.0029762	-0.022535	-0.00066174	0.038838	0.033663	0.0045954	0.047663	0.062614	-0.034701	-0.013219	-0.0037805
1175	-0.024919	-0.023297	0.62087	-0.020484	-0.039325	-0.062906	-0.016263	-0.054149	0.031434	-0.0033746	-0.043231	-0.0091419	-0.014224	0.011671	-0.048746	-0.0062466	-0.017696	-0.017696	0.13698	-0.013987	-0.03497	0.027567	-0.026356	-0.016068	-0.0070391	0.044739	0.020438	-0.06296	-0.0064077	0.030061	-0.055401	-0.013921	-0.030931	-0.12163	-0.062493	-0.023881	-0.074755	-0.042741	-0.023493	-0.035511	-0.020984	0.022697	0.02155	0.012168	0.065806	0.01482	-0.037846	-0.019797	-0.0067749
64682	0	0	0	0	0	0	0	0	0	0	0	0	0	0	0	0	0	0	0	0	0	0	0	0	0	0	0	0	0	0	0	0	0	0	0	0	0	0	0	0	0	0	0	0	0	0	0	0	0
57448	-0.021902	-0.021553	0.59262	-0.0055112	-0.027381	-0.039637	-0.021049	-0.0024319	0.027893	0.0051365	-0.025029	0.003465	-0.010125	0.050619	-0.041892	-0.0042558	-0.015068	-0.015068	0.10575	-0.006595	-0.021921	0.017311	-0.027082	-0.019495	-0.0055026	0.040854	0.017001	-0.037616	0.016497	0.021601	-0.0271	0.01073	1.71e-05	-0.074383	-0.050012	-0.022601	-0.040038	-0.025375	0.0015185	-0.023283	0.0065797	0.043047	0.026965	0.0012894	0.046953	0.07152	-0.034083	-0.010112	0.0019107
10603	-0.02363	-0.015351	0.58063	-0.007132	-0.025559	-0.037464	-0.018049	0.00017151	0.026825	0.0032086	-0.025666	0.003641	-0.011364	0.048563	-0.040315	-0.0070066	-0.015517	-0.015517	0.10351	-0.0039878	-0.021671	0.016829	-0.026663	-0.023643	-0.0042755	0.038949	0.014573	-0.039139	0.025535	0.018371	-0.023932	0.009834	0.002953	-0.07796	-0.049592	-0.031037	-0.036045	-0.021468	-0.0087149	-0.022309	0.0013217	0.039724	0.031895	-0.00095683	0.044701	0.061283	-0.0358	-0.018057	-0.0044968
55738	0	0	0	0	0	0	0	0	0	0	0	0	0	0	0	0	0	0	0	0	0	0	0	0	0	0	0	0	0	0	0	0	0	0	0	0	0	0	0	0	0	0	0	0	0	0	0	0	0
10564	-0.026842	-0.025065	0.67061	-0.019716	-0.027498	-0.049915	-0.016958	-0.031294	0.021423	1.52e-05	-0.032786	0.0016477	-0.0052795	0.040991	-0.041073	-0.010661	-0.013377	-0.013377	0.15751	-0.01432	-0.024467	0.023265	-0.019332	-0.024714	-0.0030378	0.042654	0.012257	-0.045473	-6.39e-05	0.01986	-0.031462	-0.0055701	-0.01924	-0.093691	-0.052488	-0.027078	-0.051428	-0.03093	-0.0023142	-0.029771	-0.012189	0.032037	0.032446	0.015083	0.085304	0.033344	-0.037683	0.032484	-0.013786
55333	0	0	0	0	0	0	0	0	0	0	0	0	0	0	0	0	0	0	0	0	0	0	0	0	0	0	0	0	0	0	0	0	0	0	0	0	0	0	0	0	0	0	0	0	0	0	0	0	0
9266	-0.023548	-0.020215	0.58999	-0.0051247	-0.026673	-0.03747	-0.019798	-0.0022757	0.026795	0.0034105	-0.026815	0.0038697	-0.010609	0.050672	-0.040959	-0.0047376	-0.016503	-0.016503	0.11505	-0.0067415	-0.020917	0.015478	-0.026317	-0.020639	-0.004215	0.040872	0.017197	-0.037391	0.021261	0.020894	-0.023724	0.0089263	0.0019607	-0.074927	-0.04966	-0.026661	-0.038722	-0.023236	0.00078262	-0.024216	0.0023842	0.041594	0.028895	0.0009627	0.061711	0.067329	-0.034543	0.0029651	0.0011608
10095	-0.021426	-0.018084	0.65481	-0.0221	-0.024674	-0.051748	-0.013108	-0.025839	0.027441	0.0012691	-0.025566	-1.55e-05	-0.0023533	0.039053	-0.043483	-0.01425	-0.011823	-0.011823	0.12299	-0.0057272	-0.024179	0.030074	-0.017754	-0.025857	-0.0047333	0.043047	0.010859	-0.048899	-5.2e-05	0.018188	-0.037907	-0.0012406	-0.017456	-0.098746	-0.049133	-0.026082	-0.052015	-0.031654	-0.015346	-0.022941	-0.01293	0.03284	0.044168	0.015422	0.045018	0.037721	-0.036317	-0.022235	-0.019971
2668	-0.023924	-0.016368	0.57281	-0.0045287	-0.023958	-0.037716	-0.01476	0.0035993	0.023512	0.0045113	-0.023367	0.0044493	-0.010949	0.048573	-0.042149	-0.009139	-0.017485	-0.017485	0.099469	-0.0039141	-0.020494	0.015155	-0.027139	-0.023407	-0.0041285	0.037312	0.01271	-0.038167	0.022616	0.018384	-0.022231	0.011363	0.0062985	-0.074632	-0.046748	-0.029717	-0.032992	-0.019295	-0.0061226	-0.02013	0.0013152	0.040988	0.034914	-0.0010248	0.044173	0.064758	-0.033293	-0.016123	-0.0032698
9532	0	0	0	0	0	0	0	0	0	0	0	0	0	0	0	0	0	0	0	0	0	0	0	0	0	0	0	0	0	0	0	0	0	0	0	0	0	0	0	0	0	0	0	0	0	0	0	0	0
10134	-0.023637	-0.016394	0.58102	-0.0059423	-0.025766	-0.037252	-0.016869	0.00032603	0.026861	0.0038331	-0.02557	0.0037175	-0.011108	0.049299	-0.040468	-0.006757	-0.015912	-0.015912	0.10315	-0.0042437	-0.021348	0.016797	-0.025948	-0.023154	-0.0044146	0.038528	0.014958	-0.038393	0.024701	0.019355	-0.023665	0.010523	0.004247	-0.076302	-0.049049	-0.0296	-0.035896	-0.02133	-0.0068142	-0.022426	0.0023278	0.039587	0.031685	-0.00056642	0.046068	0.063606	-0.035211	-0.015692	-0.0023862
156	-0.022294	-0.014387	0.56787	-0.0059889	-0.021569	-0.038545	-0.020945	0.0044346	0.024598	0.0075134	-0.024303	0.00028542	-0.0058676	0.050786	-0.041555	-0.0071604	-0.016895	-0.016895	0.10282	0.0050693	-0.023859	0.020122	-0.029945	-0.019757	-0.0054377	0.036607	0.016089	-0.041844	0.01414	0.016195	-0.021783	0.018647	0.0060407	-0.075887	-0.047149	-0.025994	-0.032857	-0.019853	-0.00048926	-0.013968	0.0065315	0.043224	0.030352	-0.0023783	0.047834	0.075278	-0.034479	-0.01335	0.015791
627	0	0	0	0	0	0	0	0	0	0	0	0	0	0	0	0	0	0	0	0	0	0	0	0	0	0	0	0	0	0	0	0	0	0	0	0	0	0	0	0	0	0	0	0	0	0	0	0	0
408	-0.018692	-0.022517	0.58268	-0.0038733	-0.023277	-0.037339	-0.020075	0.00083433	0.02549	0.0044862	-0.023196	0.0092868	-0.0090948	0.050619	-0.041121	-0.0037392	-0.016172	-0.016172	0.11311	-0.0041134	-0.020667	0.016804	-0.025582	-0.01919	-0.0048121	0.040501	0.017958	-0.034315	0.023439	0.019718	-0.023167	0.013063	0.00067806	-0.071225	-0.045916	-0.020525	-0.032576	-0.01993	0.0031813	-0.020312	0.006075	0.043792	0.030563	0.0029004	0.057464	0.074567	-0.034539	0.0014344	0.0010186
10018	-0.023726	-0.016919	0.58189	-0.0058056	-0.026313	-0.037784	-0.018389	4.18e-05	0.027375	0.0040947	-0.025722	0.0038841	-0.011151	0.049552	-0.040462	-0.0061472	-0.015891	-0.015891	0.10331	-0.0044003	-0.020898	0.016757	-0.026197	-0.022115	-0.0043392	0.039584	0.015823	-0.038361	0.024043	0.01958	-0.024166	0.01069	0.0033459	-0.07666	-0.049001	-0.028501	-0.036975	-0.022379	-0.0050498	-0.02224	0.0024513	0.040124	0.031058	-0.00018206	0.04624	0.064621	-0.035233	-0.014711	-0.0020205
3309	-0.0228	-0.018274	0.57669	-0.0079502	-0.024635	-0.036191	-0.018357	0.0012267	0.026855	0.0054356	-0.022602	0.0050899	-0.0086709	0.051221	-0.040689	-0.0067546	-0.017135	-0.017135	0.10196	-0.0035822	-0.020841	0.019616	-0.024781	-0.016936	-0.0036656	0.041357	0.016104	-0.040448	0.021043	0.018667	-0.025336	0.014858	-0.0023288	-0.078508	-0.047191	-0.02298	-0.036897	-0.022201	-0.0019171	-0.017312	0.00087561	0.040758	0.030305	0.00093834	0.044439	0.068478	-0.036575	-0.014153	-0.0016664
623	0	0	0	0	0	0	0	0	0	0	0	0	0	0	0	0	0	0	0	0	0	0	0	0	0	0	0	0	0	0	0	0	0	0	0	0	0	0	0	0	0	0	0	0	0	0	0	0	0
673	-0.021534	-0.013595	0.574	-0.0064157	-0.020978	-0.039322	-0.02275	0.0036568	0.025558	0.0080066	-0.024905	-0.0019066	-0.0045591	0.052124	-0.042195	-0.0068952	-0.015965	-0.015965	0.10541	0.0076277	-0.024893	0.021623	-0.031707	-0.018747	-0.0061086	0.035669	0.015554	-0.043954	0.011895	0.015637	-0.022586	0.018759	0.0074588	-0.076426	-0.048772	-0.026169	-0.032743	-0.020355	-0.0014754	-0.01377	0.0085811	0.044478	0.028637	-0.0032744	0.046253	0.077639	-0.035535	-0.013698	0.018136
1677	-0.020228	-0.015083	0.5432	-0.0084373	-0.01854	-0.034733	-0.017609	0.01128	0.022053	0.0077171	-0.015267	0.014612	-0.0034673	0.047943	-0.040604	-0.013811	-0.021084	-0.021084	0.10753	0.010184	-0.013995	0.016232	-0.024375	-0.022902	0.0035697	0.043867	0.016687	-0.033799	0.027263	0.011286	-0.016725	0.018966	0.0029556	-0.073139	-0.035881	-0.024652	-0.021026	-0.01178	-0.0067419	-0.0099338	-0.0030462	0.045092	0.05058	0.0039385	0.035323	0.068445	-0.032354	-0.019225	-0.009739
9478	-0.021156	-0.018212	0.58773	-0.0063973	-0.026742	-0.040544	-0.018723	-0.0022312	0.02573	0.0035044	-0.024813	0.0053309	-0.010598	0.048572	-0.040949	-0.0052658	-0.014973	-0.014973	0.10878	-0.0049652	-0.02285	0.017588	-0.025439	-0.021333	-0.0054759	0.037551	0.014897	-0.038729	0.022377	0.019879	-0.025728	0.01139	-0.00040848	-0.077396	-0.049753	-0.025235	-0.037282	-0.022209	-0.0041891	-0.021419	0.0041404	0.041262	0.029525	0.0020531	0.050879	0.062101	-0.035186	-0.009455	-0.0018594
801	0	0	0	0	0	0	0	0	0	0	0	0	0	0	0	0	0	0	0	0	0	0	0	0	0	0	0	0	0	0	0	0	0	0	0	0	0	0	0	0	0	0	0	0	0	0	0	0	0
821	-0.023854	-0.016381	0.58137	-0.0065045	-0.026076	-0.037649	-0.018003	-0.00014448	0.026866	0.0035558	-0.025716	0.0035825	-0.010999	0.049256	-0.040305	-0.0066693	-0.01576	-0.01576	0.10379	-0.0039987	-0.021312	0.017032	-0.02603	-0.022795	-0.0042023	0.039067	0.015271	-0.039128	0.024543	0.018884	-0.02401	0.01046	0.003109	-0.077557	-0.049332	-0.029819	-0.036854	-0.022047	-0.0072399	-0.022133	0.0015484	0.039597	0.031685	-0.00031768	0.045337	0.062248	-0.035548	-0.016976	-0.0036782
811	-0.024537	-0.019268	0.57613	-0.0078037	-0.022851	-0.029963	-0.020982	0.0040086	0.026806	0.0049668	-0.022625	0.0074856	-0.0097105	0.052011	-0.042488	-0.0071949	-0.017268	-0.017268	0.10448	-0.0011127	-0.018105	0.017581	-0.027132	-0.0174	-0.0023913	0.041539	0.016634	-0.040829	0.020756	0.016554	-0.024878	0.013007	0.0029563	-0.075895	-0.044384	-0.023342	-0.032098	-0.018252	0.00095756	-0.019134	0.0021645	0.041064	0.032375	0.0012326	0.047225	0.072307	-0.039123	-0.010367	-0.0034563
815	-0.023603	-0.016266	0.60196	-0.0085459	-0.022507	-0.040236	-0.022158	-0.00011037	0.025138	0.0081867	-0.025338	-0.0021694	-0.0045799	0.052708	-0.041428	-0.0087059	-0.015012	-0.015012	0.10657	0.0018309	-0.024267	0.021795	-0.030495	-0.020224	-0.0064657	0.036337	0.014612	-0.043707	0.0095614	0.016618	-0.022437	0.016583	0.0063667	-0.076701	-0.049823	-0.0265	-0.036436	-0.023868	0.00019497	-0.018282	0.0093506	0.042511	0.028569	-0.0025896	0.042444	0.075617	-0.034918	-0.015231	0.010445
814	0	0	0	0	0	0	0	0	0	0	0	0	0	0	0	0	0	0	0	0	0	0	0	0	0	0	0	0	0	0	0	0	0	0	0	0	0	0	0	0	0	0	0	0	0	0	0	0	0
10645	-0.023735	-0.01069	0.57246	-0.0092484	-0.022243	-0.034803	-0.024453	0.0039164	0.02347	0.006959	-0.026086	-0.0021347	-0.0079099	0.05446	-0.043547	-0.0095845	-0.017393	-0.017393	0.10425	0.0088376	-0.025093	0.020524	-0.032307	-0.020438	-0.0064056	0.034488	0.011849	-0.048986	0.013192	0.014023	-0.023583	0.017809	0.0077978	-0.079126	-0.049134	-0.027694	-0.032654	-0.018358	-0.0045037	-0.013119	0.0064468	0.041404	0.027509	-0.0051791	0.042619	0.072419	-0.038998	-0.016221	0.017594
9647	-0.029125	-0.02152	0.57883	-0.00085826	-0.032849	-0.046176	-0.0097312	-0.0091832	0.05468	0.0085492	-0.032163	0.0036679	-0.011965	0.053821	-0.035522	-0.01187	-0.018014	-0.018014	0.10212	-0.01049	-0.015898	0.022988	-0.012118	-0.0084391	-0.0053423	0.043209	0.018445	-0.040172	0.010595	0.026259	-0.030763	0.013784	-0.0076207	-0.078015	-0.049832	-0.0069312	-0.053312	-0.037151	0.0053145	-0.022771	0.0016702	0.027969	0.034937	0.013177	0.038635	0.068345	-0.027165	-0.0082106	0.001657
11069	-0.024116	-0.022834	0.61017	-0.0092043	-0.026932	-0.042803	-0.021634	-0.0088072	0.024323	0.0022349	-0.028075	0.003971	-0.0055501	0.046917	-0.038524	-0.0055765	-0.016439	-0.016439	0.13527	-0.0073412	-0.023126	0.017354	-0.024943	-0.019236	-0.0035742	0.041031	0.01657	-0.038917	0.019831	0.019679	-0.022996	0.0097991	-0.0075903	-0.07926	-0.052974	-0.02701	-0.042567	-0.025423	0.0026104	-0.024347	-0.00068663	0.040727	0.027988	0.0053399	0.077678	0.05733	-0.034681	0.023081	-0.0006206
10156	-0.028519	-0.026522	0.67073	-0.021139	-0.028505	-0.051854	-0.015423	-0.034953	0.023378	-0.0011047	-0.033455	0.00059597	-0.0054916	0.038477	-0.041657	-0.010865	-0.0099447	-0.0099447	0.1459	-0.014143	-0.025907	0.026088	-0.017094	-0.023362	-0.003845	0.041883	0.011971	-0.043967	-0.001271	0.020068	-0.033384	-0.002664	-0.018649	-0.094711	-0.051939	-0.025046	-0.054448	-0.033402	-0.0053305	-0.028646	-0.012102	0.031418	0.034577	0.013926	0.071886	0.028148	-0.038371	0.0079534	-0.014622
53944	0	0	0	0	0	0	0	0	0	0	0	0	0	0	0	0	0	0	0	0	0	0	0	0	0	0	0	0	0	0	0	0	0	0	0	0	0	0	0	0	0	0	0	0	0	0	0	0	0
57524	0	0	0	0	0	0	0	0	0	0	0	0	0	0	0	0	0	0	0	0	0	0	0	0	0	0	0	0	0	0	0	0	0	0	0	0	0	0	0	0	0	0	0	0	0	0	0	0	0
857	-0.022928	-0.02127	0.59788	-0.0062334	-0.027278	-0.041423	-0.016488	-0.0076303	0.029591	0.0039769	-0.02716	0.0051299	-0.0087037	0.045369	-0.040767	-0.0049497	-0.015262	-0.015262	0.11055	-0.0049853	-0.020221	0.019827	-0.024293	-0.019057	-0.0056319	0.041356	0.01771	-0.039653	0.015727	0.02223	-0.0281	0.011433	-0.0026575	-0.079774	-0.045737	-0.021354	-0.042416	-0.026805	-0.00030134	-0.02357	-8.7e-05	0.040495	0.031353	0.0044564	0.050677	0.059007	-0.03496	-0.012994	0.00019418
1268	-0.0082045	0.0019438	0.33292	-0.02066	-0.017064	-0.045147	0.0070394	0.0053895	0.046045	0.0079276	-0.0099544	0.022546	-0.009331	0.045534	-0.051136	-0.019164	-0.0032869	-0.0032869	0.094081	0.039707	0.0046967	0.02709	0.0011693	-0.040994	0.029423	0.053611	0.022573	-0.011068	-0.018856	0.0081355	-0.016416	-0.01135	-0.016821	-0.086196	-0.023851	-0.033538	-0.020755	-0.0045591	-0.0097134	0.018933	-0.021747	0.02812	0.087705	0.065713	0.064104	0.027918	-0.025516	0.0065502	-0.053295
1269	0	0	0	0	0	0	0	0	0	0	0	0	0	0	0	0	0	0	0	0	0	0	0	0	0	0	0	0	0	0	0	0	0	0	0	0	0	0	0	0	0	0	0	0	0	0	0	0	0
868	-0.019405	-0.010845	0.54792	-0.0096536	-0.017208	-0.035423	-0.014989	0.0094341	0.022485	0.0044099	-0.015684	0.012938	-0.005935	0.047664	-0.040083	-0.014119	-0.017985	-0.017985	0.10119	0.0070698	-0.01649	0.019852	-0.020493	-0.025976	0.00096683	0.041476	0.01408	-0.036427	0.027269	0.012248	-0.017782	0.016801	0.001208	-0.077735	-0.038505	-0.025825	-0.023983	-0.012156	-0.012331	-0.0094222	-0.0043174	0.041588	0.048644	0.0036739	0.036929	0.059356	-0.034133	-0.02353	-0.014077
64781	-0.032629	-0.014169	0.6661	-0.021867	-0.022714	-0.036525	-0.022651	-0.0086947	0.022142	0.0080755	-0.027723	-0.0036757	-0.0026085	0.058163	-0.040742	-0.01822	-0.013415	-0.013415	0.11605	-0.0011631	-0.02272	0.027681	-0.028824	-0.022926	-0.00608	0.032728	0.0062409	-0.0544	-0.0054633	0.010713	-0.025299	0.012109	0.0013291	-0.087287	-0.049085	-0.027703	-0.040941	-0.026084	-0.0029921	-0.020384	0.0050259	0.033688	0.029425	0.0013272	0.027634	0.060373	-0.041908	-0.021565	-0.0045513
1740	-0.022997	-0.017013	0.58453	-0.0060444	-0.025065	-0.038824	-0.020633	0.000214	0.026778	0.0053929	-0.02597	0.0011341	-0.008686	0.051111	-0.041667	-0.0063424	-0.01589	-0.01589	0.10524	-0.00098198	-0.022754	0.018274	-0.029073	-0.020332	-0.0050681	0.038608	0.016137	-0.040516	0.017673	0.018773	-0.024009	0.013789	0.005317	-0.076068	-0.049462	-0.027273	-0.036909	-0.022819	-0.0016804	-0.020346	0.005804	0.042332	0.029324	-0.0015337	0.046949	0.070907	-0.034431	-0.013147	0.0059722
330	-0.023615	-0.019085	0.59146	-0.00571	-0.027073	-0.03881	-0.019838	-0.0018439	0.027806	0.0043833	-0.025835	0.0029333	-0.0099059	0.051474	-0.041121	-0.0049124	-0.015326	-0.015326	0.10687	-0.0059845	-0.021422	0.017271	-0.02672	-0.021628	-0.0039796	0.040353	0.016146	-0.038149	0.018991	0.020572	-0.025902	0.010329	0.002857	-0.075442	-0.050132	-0.026618	-0.039223	-0.024215	-0.0016835	-0.023485	0.0046052	0.041704	0.029066	0.00011679	0.045764	0.06824	-0.034732	-0.013314	-0.00033947
10207	-0.019405	-0.010845	0.54792	-0.0096536	-0.017208	-0.035423	-0.014989	0.0094341	0.022485	0.0044099	-0.015684	0.012938	-0.005935	0.047664	-0.040083	-0.014119	-0.017985	-0.017985	0.10119	0.0070698	-0.01649	0.019852	-0.020493	-0.025976	0.00096683	0.041476	0.01408	-0.036427	0.027269	0.012248	-0.017782	0.016801	0.001208	-0.077735	-0.038505	-0.025825	-0.023983	-0.012156	-0.012331	-0.0094222	-0.0043174	0.041588	0.048644	0.0036739	0.036929	0.059356	-0.034133	-0.02353	-0.014077
11113	-0.019999	0.0070935	0.60766	-0.02532	-0.0036778	-0.052291	-0.024039	-0.00065149	0.013411	0.015718	-0.01877	-0.017853	0.018502	0.04305	-0.038488	-0.026682	-0.011993	-0.011993	0.11602	0.042183	-0.033751	0.041073	-0.030527	-0.02778	-0.0085155	0.018502	-0.00040256	-0.066121	-0.02014	-0.003281	-0.02178	0.024997	0.0028442	-0.096414	-0.049031	-0.035355	-0.027249	-0.017142	-0.024225	0.011399	-0.001096	0.031894	0.04117	-0.00072326	0.019004	0.056097	-0.041	-0.036225	0.019485
1211	-0.025567	-0.016328	0.65734	-0.022707	-0.026063	-0.051904	-0.013442	-0.02629	0.027716	0.0025118	-0.027353	-0.00075673	-0.0028543	0.03963	-0.04287	-0.015082	-0.012088	-0.012088	0.12396	-0.0066028	-0.024671	0.030699	-0.017798	-0.026484	-0.003944	0.04268	0.011482	-0.050768	-7.78e-05	0.018701	-0.036805	-0.0015238	-0.018397	-0.10131	-0.050513	-0.026384	-0.053203	-0.03121	-0.016516	-0.02331	-0.013954	0.03127	0.04343	0.016067	0.04484	0.037476	-0.03745	-0.022059	-0.021012
6249	-0.026382	-0.017026	0.5777	-0.0070352	-0.026063	-0.033904	-0.021132	0.0025446	0.025239	0.0047692	-0.02433	0.0062756	-0.012597	0.050429	-0.042775	-0.0085288	-0.018382	-0.018382	0.10062	-0.0029296	-0.019639	0.016141	-0.027809	-0.017066	-0.0032884	0.039081	0.014325	-0.044089	0.018699	0.017128	-0.026448	0.01457	0.0022826	-0.078603	-0.046229	-0.024365	-0.035732	-0.020198	-0.00030251	-0.019418	9.83e-05	0.039302	0.030338	-0.00038726	0.045596	0.066125	-0.03811	-0.01242	-0.0034193
1072	-0.019405	-0.010845	0.54792	-0.0096536	-0.017208	-0.035423	-0.014989	0.0094341	0.022485	0.0044099	-0.015684	0.012938	-0.005935	0.047664	-0.040083	-0.014119	-0.017985	-0.017985	0.10119	0.0070698	-0.01649	0.019852	-0.020493	-0.025976	0.00096683	0.041476	0.01408	-0.036427	0.027269	0.012248	-0.017782	0.016801	0.001208	-0.077735	-0.038505	-0.025825	-0.023983	-0.012156	-0.012331	-0.0094222	-0.0043174	0.041588	0.048644	0.0036739	0.036929	0.059356	-0.034133	-0.02353	-0.014077
1277	-0.023651	-0.01594	0.57898	-0.0064153	-0.025064	-0.037839	-0.018209	0.0013488	0.026242	0.0040937	-0.025132	0.0043384	-0.01112	0.049044	-0.040992	-0.0074175	-0.016402	-0.016402	0.1026	-0.0025283	-0.020871	0.016756	-0.026484	-0.022874	-0.0039924	0.039526	0.014881	-0.039286	0.024149	0.018534	-0.023642	0.011177	0.0046939	-0.077225	-0.048298	-0.028915	-0.035424	-0.021366	-0.0067424	-0.021108	0.0013041	0.039813	0.033246	-0.00030203	0.044514	0.063804	-0.035384	-0.016627	-0.0041562
10815	0	0	0	0	0	0	0	0	0	0	0	0	0	0	0	0	0	0	0	0	0	0	0	0	0	0	0	0	0	0	0	0	0	0	0	0	0	0	0	0	0	0	0	0	0	0	0	0	0
2017	-0.019405	-0.010845	0.54792	-0.0096536	-0.017208	-0.035423	-0.014989	0.0094341	0.022485	0.0044099	-0.015684	0.012938	-0.005935	0.047664	-0.040083	-0.014119	-0.017985	-0.017985	0.10119	0.0070698	-0.01649	0.019852	-0.020493	-0.025976	0.00096683	0.041476	0.01408	-0.036427	0.027269	0.012248	-0.017782	0.016801	0.001208	-0.077735	-0.038505	-0.025825	-0.023983	-0.012156	-0.012331	-0.0094222	-0.0043174	0.041588	0.048644	0.0036739	0.036929	0.059356	-0.034133	-0.02353	-0.014077
94274	0	0	0	0	0	0	0	0	0	0	0	0	0	0	0	0	0	0	0	0	0	0	0	0	0	0	0	0	0	0	0	0	0	0	0	0	0	0	0	0	0	0	0	0	0	0	0	0	0
9419	0	0	0	0	0	0	0	0	0	0	0	0	0	0	0	0	0	0	0	0	0	0	0	0	0	0	0	0	0	0	0	0	0	0	0	0	0	0	0	0	0	0	0	0	0	0	0	0	0
1808	-0.025645	-0.019178	0.59234	-0.0045776	-0.02832	-0.041075	-0.017018	-0.0040207	0.033033	0.0048196	-0.027239	0.0038381	-0.011573	0.056368	-0.04017	-0.007293	-0.016094	-0.016094	0.10506	-0.0071452	-0.020755	0.018581	-0.02383	-0.019542	-0.005003	0.040602	0.015231	-0.038738	0.018045	0.021588	-0.027391	0.011342	0.00064537	-0.077132	-0.049856	-0.022109	-0.042368	-0.026432	-0.0013105	-0.023197	0.0029618	0.038138	0.031982	0.0021226	0.042935	0.067476	-0.034184	-0.014062	-0.0017107
80331	0	0	0	0	0	0	0	0	0	0	0	0	0	0	0	0	0	0	0	0	0	0	0	0	0	0	0	0	0	0	0	0	0	0	0	0	0	0	0	0	0	0	0	0	0	0	0	0	0
1329	0	0	0	0	0	0	0	0	0	0	0	0	0	0	0	0	0	0	0	0	0	0	0	0	0	0	0	0	0	0	0	0	0	0	0	0	0	0	0	0	0	0	0	0	0	0	0	0	0
1812	-0.020751	-0.00458	0.45149	-0.0096065	-0.025807	-0.04193	-0.0057286	0.0085896	0.040284	0.0073986	-0.018385	0.018767	-0.018034	0.055646	-0.044587	-0.0092486	-0.0083801	-0.0083801	0.094569	0.011307	0.0002883	0.021132	-0.009734	-0.030241	0.01806	0.050049	0.023865	-0.021891	0.0051351	0.012504	-0.017061	0.0046896	-0.0062125	-0.07712	-0.030163	-0.029091	-0.025117	-0.01093	0.0030258	0.0048191	-0.0091164	0.038618	0.061007	0.034549	0.060524	0.05177	-0.028524	0.0029075	-0.023688
1813	-0.021331	-0.0037729	0.49047	-0.0091274	-0.025918	-0.04128	-0.0072313	0.0089885	0.036446	0.0061473	-0.018621	0.017093	-0.013626	0.057685	-0.044497	-0.0090755	-0.010614	-0.010614	0.10129	0.0088047	-0.0012472	0.021449	-0.0119	-0.029612	0.017119	0.048772	0.023842	-0.025004	0.0096708	0.013599	-0.018083	0.0071553	-0.0061629	-0.077327	-0.030418	-0.027743	-0.024801	-0.011427	0.0011517	0.00033481	-0.0077976	0.040556	0.060714	0.029179	0.054981	0.05475	-0.02996	-0.0016213	-0.020145
1814	-0.020646	-0.0041402	0.48523	-0.0089717	-0.025968	-0.040377	-0.008585	0.0086415	0.037759	0.0065896	-0.019016	0.016975	-0.015573	0.057185	-0.043926	-0.0090552	-0.0096088	-0.0096088	0.10019	0.010031	-0.0019206	0.021624	-0.012354	-0.029546	0.01514	0.048107	0.023439	-0.024886	0.011227	0.013354	-0.01724	0.006926	-0.0047911	-0.076908	-0.03166	-0.028212	-0.024188	-0.01113	0.00045846	0.00067683	-0.0069687	0.040771	0.059207	0.029162	0.054626	0.054644	-0.031381	-0.0014717	-0.019833
9229	-0.019405	-0.010845	0.54792	-0.0096536	-0.017208	-0.035423	-0.014989	0.0094341	0.022485	0.0044099	-0.015684	0.012938	-0.005935	0.047664	-0.040083	-0.014119	-0.017985	-0.017985	0.10119	0.0070698	-0.01649	0.019852	-0.020493	-0.025976	0.00096683	0.041476	0.01408	-0.036427	0.027269	0.012248	-0.017782	0.016801	0.001208	-0.077735	-0.038505	-0.025825	-0.023983	-0.012156	-0.012331	-0.0094222	-0.0043174	0.041588	0.048644	0.0036739	0.036929	0.059356	-0.034133	-0.02353	-0.014077
1612	-0.022048	-0.014268	0.56924	-0.0070908	-0.021255	-0.039071	-0.022255	0.0036229	0.02529	0.0070471	-0.024048	-0.00039948	-0.0034242	0.051012	-0.040456	-0.0065172	-0.01558	-0.01558	0.10326	0.0068433	-0.024851	0.022337	-0.030033	-0.017899	-0.0055277	0.036655	0.015975	-0.042671	0.017008	0.016417	-0.021882	0.020478	0.0047315	-0.07707	-0.049395	-0.026604	-0.033808	-0.020592	-0.0018725	-0.012342	0.0074983	0.043789	0.027956	-0.0031339	0.045128	0.075223	-0.035165	-0.014679	0.016181
1636	-0.028427	-0.018237	0.58771	-0.0043266	-0.028644	-0.036527	-0.017302	-0.0048823	0.032523	0.0039597	-0.024412	0.015441	-0.013769	0.057785	-0.040977	-0.0088756	-0.016223	-0.016223	0.10277	-0.0066712	-0.018288	0.020322	-0.021688	-0.015468	-0.0029201	0.041606	0.014391	-0.042935	0.013685	0.021035	-0.030561	0.023498	-0.0046602	-0.080091	-0.038094	-0.0062551	-0.038155	-0.019663	0.0039033	-0.017102	-0.0008703	0.037959	0.033215	0.0033437	0.044765	0.06547	-0.039756	-0.011675	-0.0032545
23397	0	0	0	0	0	0	0	0	0	0	0	0	0	0	0	0	0	0	0	0	0	0	0	0	0	0	0	0	0	0	0	0	0	0	0	0	0	0	0	0	0	0	0	0	0	0	0	0	0
1716	-0.031688	-0.014194	0.71699	-0.0254	-0.018171	-0.055038	-0.019019	-0.022668	0.019202	0.012234	-0.028331	-0.011858	0.0063529	0.049755	-0.037919	-0.021345	-0.0086629	-0.0086629	0.12315	-0.002301	-0.027615	0.034443	-0.026418	-0.028954	-0.0071499	0.030469	0.0031887	-0.055785	-0.01871	0.01031	-0.026535	0.0088741	-0.0029292	-0.091905	-0.052373	-0.031545	-0.046315	-0.033281	-0.0082656	-0.023289	0.0035242	0.028594	0.034712	0.0042333	0.02231	0.052468	-0.037333	-0.029852	-0.0066251
1855	-0.025774	-0.018774	0.61588	-0.0097112	-0.027764	-0.044567	-0.016051	-0.010003	0.027132	0.0076066	-0.027518	0.0046444	-0.009333	0.045114	-0.041288	-0.0096564	-0.016601	-0.016601	0.11305	-0.0049408	-0.020035	0.020851	-0.022561	-0.02229	-0.0028128	0.042207	0.016697	-0.042878	0.013907	0.020499	-0.02885	0.0097018	-0.0044977	-0.085096	-0.0482	-0.024524	-0.042588	-0.026786	-0.003471	-0.021375	-0.0039772	0.035511	0.036562	0.0080429	0.045996	0.058458	-0.034593	-0.012809	-0.0069946
8788	-0.025567	-0.016328	0.65734	-0.022707	-0.026063	-0.051904	-0.013442	-0.02629	0.027716	0.0025118	-0.027353	-0.00075673	-0.0028543	0.03963	-0.04287	-0.015082	-0.012088	-0.012088	0.12396	-0.0066028	-0.024671	0.030699	-0.017798	-0.026484	-0.003944	0.04268	0.011482	-0.050768	-7.78e-05	0.018701	-0.036805	-0.0015238	-0.018397	-0.10131	-0.050513	-0.026384	-0.053203	-0.03121	-0.016516	-0.02331	-0.013954	0.03127	0.04343	0.016067	0.04484	0.037476	-0.03745	-0.022059	-0.021012
3301	-0.018048	-0.011633	0.54356	-0.0070231	-0.015318	-0.033255	-0.014046	0.013653	0.02196	0.0043281	-0.014057	0.01403	-0.0050833	0.049225	-0.039699	-0.01321	-0.018336	-0.018336	0.098009	0.00803	-0.015577	0.01853	-0.021225	-0.026878	0.00032662	0.040949	0.014421	-0.033062	0.028864	0.012898	-0.01603	0.01716	0.004036	-0.07192	-0.036905	-0.024977	-0.019096	-0.0094613	-0.010198	-0.0092907	-0.001247	0.04351	0.048233	0.0022936	0.037676	0.065029	-0.033635	-0.020815	-0.012017
8448	-0.026029	-0.017227	0.60503	-0.010602	-0.026649	-0.040213	-0.017005	-0.005633	0.029298	0.0035575	-0.026733	0.0040132	-0.0094482	0.050012	-0.040848	-0.0084679	-0.014483	-0.014483	0.111	-0.0050378	-0.019859	0.020578	-0.024154	-0.022851	-0.0033133	0.040459	0.015141	-0.040281	0.017388	0.018786	-0.025903	0.0070778	-0.0016733	-0.082677	-0.048681	-0.027796	-0.040622	-0.024316	-0.006285	-0.022901	0.00041402	0.03833	0.034707	0.0055467	0.045194	0.058114	-0.03641	-0.01492	-0.007996
1796	0	0	0	0	0	0	0	0	0	0	0	0	0	0	0	0	0	0	0	0	0	0	0	0	0	0	0	0	0	0	0	0	0	0	0	0	0	0	0	0	0	0	0	0	0	0	0	0	0
4985	-0.019405	-0.010845	0.54792	-0.0096536	-0.017208	-0.035423	-0.014989	0.0094341	0.022485	0.0044099	-0.015684	0.012938	-0.005935	0.047664	-0.040083	-0.014119	-0.017985	-0.017985	0.10119	0.0070698	-0.01649	0.019852	-0.020493	-0.025976	0.00096683	0.041476	0.01408	-0.036427	0.027269	0.012248	-0.017782	0.016801	0.001208	-0.077735	-0.038505	-0.025825	-0.023983	-0.012156	-0.012331	-0.0094222	-0.0043174	0.041588	0.048644	0.0036739	0.036929	0.059356	-0.034133	-0.02353	-0.014077
1759	-0.02403	-0.016435	0.58224	-0.0067472	-0.025852	-0.038172	-0.018328	8.58e-05	0.026417	0.0035508	-0.025892	0.0034225	-0.011145	0.049087	-0.040831	-0.0071218	-0.016053	-0.016053	0.10323	-0.0034304	-0.02146	0.016554	-0.026724	-0.022827	-0.0043987	0.039347	0.014716	-0.039402	0.024038	0.018848	-0.024051	0.010309	0.0053409	-0.077437	-0.04962	-0.030015	-0.036703	-0.022219	-0.0071637	-0.022173	0.0016898	0.039519	0.031783	-0.00068882	0.044565	0.063139	-0.035276	-0.016842	-0.004072
1859	-0.020824	-0.012429	0.57414	-0.006479	-0.019798	-0.039012	-0.023938	0.0043793	0.025332	0.0092081	-0.024488	-0.002557	-0.0045384	0.051536	-0.042533	-0.0067836	-0.015958	-0.015958	0.10469	0.010792	-0.025379	0.022204	-0.032597	-0.018871	-0.0067708	0.035515	0.015018	-0.045333	0.0096608	0.015315	-0.023612	0.020093	0.0065332	-0.076717	-0.048203	-0.024532	-0.032073	-0.019755	-0.00028934	-0.010858	0.008448	0.044702	0.029276	-0.0033948	0.047059	0.079915	-0.036354	-0.012966	0.023307
1917	-0.022438	-0.017743	0.59222	-0.015755	-0.017915	-0.035991	-0.014972	0.0015237	0.02739	0.0035134	-0.017844	0.010371	-0.0016995	0.051571	-0.040805	-0.013608	-0.014784	-0.014784	0.1187	0.0043307	-0.014225	0.023286	-0.021248	-0.025464	0.00012614	0.041642	0.014332	-0.035649	0.016917	0.011372	-0.018942	0.0089864	-0.0044516	-0.081446	-0.039634	-0.025211	-0.030083	-0.016869	-0.0083196	-0.012664	-0.00069218	0.044581	0.050169	0.01338	0.039929	0.058323	-0.036581	-0.013071	-0.019173
1938	0	0	0	0	0	0	0	0	0	0	0	0	0	0	0	0	0	0	0	0	0	0	0	0	0	0	0	0	0	0	0	0	0	0	0	0	0	0	0	0	0	0	0	0	0	0	0	0	0
29904	-0.022725	-0.014846	0.58445	-0.0082955	-0.019812	-0.037808	-0.022977	0.0030157	0.02478	0.0083742	-0.024666	-0.0022774	-0.003351	0.052534	-0.041461	-0.0080392	-0.015241	-0.015241	0.1072	0.0073632	-0.025033	0.021983	-0.032014	-0.020659	-0.0070859	0.03532	0.014623	-0.043687	0.01129	0.014797	-0.020974	0.018083	0.0073059	-0.07631	-0.048819	-0.027079	-0.032159	-0.020411	-0.0018957	-0.014337	0.010157	0.044765	0.029547	-0.0034293	0.043735	0.07927	-0.036093	-0.014327	0.01719
23362	-0.022312	-0.025544	0.64779	-0.024483	-0.022635	-0.046512	-0.017495	-0.024535	0.019211	-0.0032885	-0.027193	0.004096	-0.00010609	0.038019	-0.041716	-0.014847	-0.012601	-0.012601	0.14605	-0.0029434	-0.024908	0.026288	-0.016525	-0.025295	-0.0032572	0.048561	0.012769	-0.041507	0.0053965	0.017475	-0.0269	-0.0027304	-0.016398	-0.090314	-0.048897	-0.025374	-0.045648	-0.027288	-0.0079527	-0.024426	-0.012477	0.035757	0.042887	0.014793	0.077965	0.034042	-0.035815	0.016099	-0.018193
1964	-0.022438	-0.017743	0.59222	-0.015755	-0.017915	-0.035991	-0.014972	0.0015237	0.02739	0.0035134	-0.017844	0.010371	-0.0016995	0.051571	-0.040805	-0.013608	-0.014784	-0.014784	0.1187	0.0043307	-0.014225	0.023286	-0.021248	-0.025464	0.00012614	0.041642	0.014332	-0.035649	0.016917	0.011372	-0.018942	0.0089864	-0.0044516	-0.081446	-0.039634	-0.025211	-0.030083	-0.016869	-0.0083196	-0.012664	-0.00069218	0.044581	0.050169	0.01338	0.039929	0.058323	-0.036581	-0.013071	-0.019173
8669	-0.023685	-0.018273	0.58555	-0.0058631	-0.026739	-0.037978	-0.018547	-0.00064902	0.028465	0.0042137	-0.026091	0.0034141	-0.01082	0.050525	-0.040705	-0.0054257	-0.01568	-0.01568	0.10527	-0.0048389	-0.020827	0.016817	-0.026428	-0.021448	-0.0046971	0.039809	0.016365	-0.037797	0.021588	0.019995	-0.024646	0.01048	0.0028667	-0.075963	-0.049324	-0.02737	-0.037965	-0.02324	-0.0031791	-0.023083	0.003977	0.040958	0.030546	0.00063264	0.047847	0.066539	-0.034704	-0.012129	-0.0011595
13681	0	0	0	0	0	0	0	0	0	0	0	0	0	0	0	0	0	0	0	0	0	0	0	0	0	0	0	0	0	0	0	0	0	0	0	0	0	0	0	0	0	0	0	0	0	0	0	0	0
1982	-0.023527	-0.019213	0.58589	-0.0059866	-0.026312	-0.037378	-0.018653	-0.00031651	0.029103	0.0046193	-0.025636	0.0039616	-0.010389	0.051171	-0.040911	-0.0051825	-0.015608	-0.015608	0.1062	-0.0046374	-0.020152	0.016926	-0.026486	-0.020916	-0.0046815	0.040268	0.016921	-0.037194	0.020389	0.020019	-0.024423	0.010722	0.002064	-0.07532	-0.048414	-0.025867	-0.037593	-0.02313	-0.001461	-0.022713	0.004813	0.04182	0.031094	0.0016134	0.048704	0.068623	-0.034585	-0.010096	-0.00082135
6456	-0.02403	-0.016435	0.58224	-0.0067472	-0.025852	-0.038172	-0.018328	8.58e-05	0.026417	0.0035508	-0.025892	0.0034225	-0.011145	0.049087	-0.040831	-0.0071218	-0.016053	-0.016053	0.10323	-0.0034304	-0.02146	0.016554	-0.026724	-0.022827	-0.0043987	0.039347	0.014716	-0.039402	0.024038	0.018848	-0.024051	0.010309	0.0053409	-0.077437	-0.04962	-0.030015	-0.036703	-0.022219	-0.0071637	-0.022173	0.0016898	0.039519	0.031783	-0.00068882	0.044565	0.063139	-0.035276	-0.016842	-0.004072
5179	-0.018114	-0.011557	0.54338	-0.0070231	-0.01502	-0.033255	-0.01406	0.013789	0.021866	0.0044395	-0.014041	0.013976	-0.0051461	0.049554	-0.039564	-0.01334	-0.018276	-0.018276	0.097996	0.0080262	-0.015636	0.01858	-0.0211	-0.027008	0.00026267	0.040949	0.014325	-0.032944	0.028938	0.012901	-0.015914	0.017057	0.0041844	-0.071841	-0.036952	-0.025149	-0.019053	-0.0094286	-0.010271	-0.0093505	-0.001161	0.043788	0.048187	0.0021964	0.037735	0.065139	-0.033534	-0.020847	-0.01202
1948	-0.017771	-0.011025	0.54521	-0.0071241	-0.015504	-0.033578	-0.013755	0.013113	0.022275	0.0044662	-0.014798	0.013572	-0.0054968	0.048738	-0.039829	-0.01331	-0.018398	-0.018398	0.098733	0.0080439	-0.015467	0.018541	-0.021137	-0.026564	0.00023424	0.041217	0.01441	-0.033707	0.028269	0.012956	-0.016612	0.017318	0.0035433	-0.073005	-0.037253	-0.02533	-0.019525	-0.0093355	-0.010414	-0.0098674	-0.0014487	0.042887	0.048507	0.0028781	0.037898	0.064297	-0.033494	-0.020665	-0.011855
55914	-0.022198	-0.018549	0.58499	-0.0054817	-0.025498	-0.03792	-0.017902	-0.00022992	0.027747	0.0042	-0.02454	0.0042977	-0.010454	0.049588	-0.041542	-0.0056553	-0.015779	-0.015779	0.10388	-0.0040056	-0.020555	0.017276	-0.025762	-0.021319	-0.0048281	0.040183	0.016262	-0.038266	0.021255	0.020217	-0.025466	0.01074	0.0019221	-0.075575	-0.047834	-0.026036	-0.037154	-0.022719	-0.0032388	-0.02226	0.0027143	0.041057	0.031746	0.00069384	0.047942	0.06646	-0.034723	-0.013469	-0.0015616
23114	0	0	0	0	0	0	0	0	0	0	0	0	0	0	0	0	0	0	0	0	0	0	0	0	0	0	0	0	0	0	0	0	0	0	0	0	0	0	0	0	0	0	0	0	0	0	0	0	0
2241	-0.024337	-0.013654	0.60521	-0.012274	-0.019036	-0.042099	-0.018645	-0.0036628	0.027345	0.0074541	-0.026466	0.00012823	-0.0026463	0.05005	-0.042157	-0.010228	-0.014771	-0.014771	0.11761	0.0088346	-0.021138	0.02756	-0.028081	-0.019941	-0.0050147	0.036729	0.012665	-0.043952	0.0041671	0.013786	-0.024814	0.012852	0.0030848	-0.084698	-0.04397	-0.023238	-0.03527	-0.020633	-0.0029094	-0.012924	0.003658	0.041619	0.035912	0.0051261	0.044668	0.066914	-0.039036	-0.011859	0.014877
2335	-0.021986	-0.018959	0.58784	-0.0065457	-0.026271	-0.038353	-0.018371	-0.0015404	0.028318	0.0040481	-0.024453	0.0039387	-0.010331	0.049492	-0.041858	-0.0056032	-0.015293	-0.015293	0.10492	-0.0046518	-0.020998	0.017779	-0.026019	-0.021457	-0.0047975	0.040627	0.016181	-0.038695	0.019848	0.02008	-0.025974	0.010129	0.0010701	-0.076473	-0.048098	-0.025518	-0.038744	-0.023927	-0.0029489	-0.022639	0.0025641	0.041006	0.031253	0.0011458	0.048346	0.06589	-0.034615	-0.013353	-0.00011938
2316	-0.02128	-0.013175	0.53569	-0.0082312	-0.024526	-0.037349	-0.015921	0.0051296	0.028672	0.0068471	-0.023155	0.0095969	-0.013358	0.052495	-0.043945	-0.010053	-0.015893	-0.015893	0.10189	0.0065902	-0.013591	0.017454	-0.019878	-0.023742	0.0051626	0.042678	0.018466	-0.033941	0.019852	0.01494	-0.020549	0.01228	5.05e-05	-0.077218	-0.040832	-0.028325	-0.029735	-0.015693	-0.0018309	-0.010099	-0.0044765	0.040891	0.046327	0.01615	0.052282	0.063566	-0.032736	-0.0095562	-0.010686
3350	-0.01036	0.0046376	0.25445	-0.021298	-0.018031	-0.040337	0.012629	0.015479	0.041439	0.009099	-0.0029473	0.029514	-0.012842	0.053146	-0.045212	-0.02334	-0.0026373	-0.0026373	0.08367	0.042368	0.022419	0.024513	0.011941	-0.040022	0.042127	0.052709	0.024629	-0.0030033	-0.016525	0.0019376	-0.00055535	-0.004253	-0.013731	-0.076362	-0.010405	-0.028644	-0.0084629	0.0053423	0.0022246	0.03214	-0.020832	0.029008	0.099161	0.07999	0.056737	0.02531	-0.017522	0.011009	-0.058357
3358	-0.030806	-0.0074326	0.41972	-0.011077	-0.032365	-0.044072	0.014128	-0.00082558	0.080627	0.015129	-0.030699	0.01857	-0.016263	0.054454	-0.026933	-0.028863	-0.013056	-0.013056	0.097625	0.012753	0.018347	0.031866	0.019498	-0.0096676	0.023827	0.049403	0.026637	-0.027715	-0.00126	0.013854	-0.011506	0.0077642	-0.018431	-0.081367	-0.022369	-0.0030149	-0.039295	-0.024565	0.0093226	0.011146	-0.015043	0.013348	0.074257	0.071909	0.037827	0.032969	-0.013668	0.0085026	-0.028855
3356	-0.030806	-0.0074326	0.41972	-0.011077	-0.032365	-0.044072	0.014128	-0.00082558	0.080627	0.015129	-0.030699	0.01857	-0.016263	0.054454	-0.026933	-0.028863	-0.013056	-0.013056	0.097625	0.012753	0.018347	0.031866	0.019498	-0.0096676	0.023827	0.049403	0.026637	-0.027715	-0.00126	0.013854	-0.011506	0.0077642	-0.018431	-0.081367	-0.022369	-0.0030149	-0.039295	-0.024565	0.0093226	0.011146	-0.015043	0.013348	0.074257	0.071909	0.037827	0.032969	-0.013668	0.0085026	-0.028855
3360	-0.01036	0.0046376	0.25445	-0.021298	-0.018031	-0.040337	0.012629	0.015479	0.041439	0.009099	-0.0029473	0.029514	-0.012842	0.053146	-0.045212	-0.02334	-0.0026373	-0.0026373	0.08367	0.042368	0.022419	0.024513	0.011941	-0.040022	0.042127	0.052709	0.024629	-0.0030033	-0.016525	0.0019376	-0.00055535	-0.004253	-0.013731	-0.076362	-0.010405	-0.028644	-0.0084629	0.0053423	0.0022246	0.03214	-0.020832	0.029008	0.099161	0.07999	0.056737	0.02531	-0.017522	0.011009	-0.058357
11146	-0.023552	-0.01707	0.58169	-0.0054779	-0.026245	-0.037436	-0.017918	0.00027919	0.027488	0.0041381	-0.025655	0.0038142	-0.011095	0.049718	-0.040597	-0.0059992	-0.016037	-0.016037	0.10335	-0.0043983	-0.021062	0.016754	-0.026194	-0.022211	-0.0043555	0.039275	0.015793	-0.038186	0.024085	0.019679	-0.024129	0.010967	0.0043943	-0.076029	-0.048994	-0.028316	-0.036501	-0.022126	-0.0050085	-0.022359	0.0027874	0.04019	0.030981	-0.0004621	0.046663	0.065112	-0.035023	-0.014323	-0.0011764
2308	-0.021543	-0.024012	0.58065	-0.0041164	-0.022897	-0.032428	-0.020397	0.0039172	0.029004	0.0060872	-0.022847	0.008907	-0.0047782	0.05458	-0.041723	-0.0037598	-0.0159	-0.0159	0.11121	-0.0015292	-0.016711	0.015388	-0.028814	-0.019248	-0.0018385	0.043476	0.020148	-0.03237	0.023517	0.018832	-0.022725	0.01191	0.0041224	-0.069251	-0.043437	-0.02096	-0.031492	-0.020246	0.0059966	-0.019663	0.006779	0.045831	0.032928	0.0028754	0.04793	0.081486	-0.034718	-0.0037929	-0.00017469
8637	-0.02338	-0.018223	0.5927	-0.0066632	-0.027265	-0.039067	-0.018944	-0.0030321	0.028644	0.0037055	-0.026381	0.0024021	-0.010297	0.049715	-0.041494	-0.0052195	-0.015061	-0.015061	0.10615	-0.0059307	-0.022223	0.017632	-0.026775	-0.021643	-0.0051155	0.040202	0.01615	-0.039281	0.019873	0.02082	-0.027087	0.0088759	0.0016744	-0.077875	-0.050351	-0.027166	-0.040372	-0.024503	-0.0040204	-0.024086	0.0027585	0.040858	0.029326	0.00055815	0.048544	0.065649	-0.035062	-0.013655	-0.0013265
23401	-0.025567	-0.016328	0.65734	-0.022707	-0.026063	-0.051904	-0.013442	-0.02629	0.027716	0.0025118	-0.027353	-0.00075673	-0.0028543	0.03963	-0.04287	-0.015082	-0.012088	-0.012088	0.12396	-0.0066028	-0.024671	0.030699	-0.017798	-0.026484	-0.003944	0.04268	0.011482	-0.050768	-7.78e-05	0.018701	-0.036805	-0.0015238	-0.018397	-0.10131	-0.050513	-0.026384	-0.053203	-0.03121	-0.016516	-0.02331	-0.013954	0.03127	0.04343	0.016067	0.04484	0.037476	-0.03745	-0.022059	-0.021012
2554	0.0099469	-0.031029	0.16139	-0.0076786	-0.065643	-0.070604	-0.0099049	-0.10608	0.029644	-0.022938	-0.07068	-0.0165	-0.050116	-0.085402	-0.062302	0.023159	-0.029573	-0.029573	0.11266	-0.010053	-0.057489	0.014393	-0.039419	0.018642	-0.017416	0.049951	0.050772	-0.071631	-0.0079551	0.06114	-0.099383	-0.043549	-0.053587	-0.15251	-0.068866	-0.012696	-0.12573	-0.066133	-0.042685	-0.040567	-0.035932	-0.0039414	-0.029092	-0.0074035	0.11946	-0.082523	-0.030752	-0.0022721	0.041963
2550	-0.019405	-0.010845	0.54792	-0.0096536	-0.017208	-0.035423	-0.014989	0.0094341	0.022485	0.0044099	-0.015684	0.012938	-0.005935	0.047664	-0.040083	-0.014119	-0.017985	-0.017985	0.10119	0.0070698	-0.01649	0.019852	-0.020493	-0.025976	0.00096683	0.041476	0.01408	-0.036427	0.027269	0.012248	-0.017782	0.016801	0.001208	-0.077735	-0.038505	-0.025825	-0.023983	-0.012156	-0.012331	-0.0094222	-0.0043174	0.041588	0.048644	0.0036739	0.036929	0.059356	-0.034133	-0.02353	-0.014077
23766	0	0	0	0	0	0	0	0	0	0	0	0	0	0	0	0	0	0	0	0	0	0	0	0	0	0	0	0	0	0	0	0	0	0	0	0	0	0	0	0	0	0	0	0	0	0	0	0	0
10287	-0.023993	-0.020502	0.59123	-0.0057893	-0.027135	-0.038028	-0.01951	-0.0032961	0.026515	0.0026915	-0.027017	0.0037428	-0.010443	0.050179	-0.040879	-0.0047513	-0.01535	-0.01535	0.11329	-0.0071777	-0.021975	0.015914	-0.025772	-0.020454	-0.0044981	0.040301	0.016398	-0.037077	0.020634	0.020614	-0.02463	0.010362	0.001934	-0.074992	-0.049544	-0.02633	-0.039373	-0.023937	3.91e-05	-0.023802	0.0022896	0.041746	0.029062	0.00026282	0.058945	0.064855	-0.035035	-0.0026363	0.00090967
2773	-0.032924	-0.016836	0.50506	-0.0035902	-0.035179	-0.050981	0.011756	-0.017456	0.083287	0.014447	-0.043449	0.0074932	-0.013485	0.044292	-0.025544	-0.025533	-0.020358	-0.020358	0.11597	-0.004854	-0.0022463	0.029788	0.011476	-0.0019015	0.0061011	0.048431	0.023708	-0.042551	0.0028851	0.024044	-0.027267	0.0057204	-0.022171	-0.087064	-0.041226	0.00012909	-0.059382	-0.041453	0.0039399	-0.0086764	-0.015837	0.0061447	0.049696	0.050245	0.057808	0.036873	-0.016169	0.021788	-0.010098
2775	-0.032513	-0.015403	0.50051	-0.0038041	-0.035247	-0.051516	0.012823	-0.015723	0.085887	0.015472	-0.041687	0.0069105	-0.013287	0.044221	-0.026521	-0.025625	-0.018834	-0.018834	0.10087	-0.0027005	-0.0020713	0.031959	0.010945	-0.0023816	0.0055386	0.048482	0.023688	-0.042414	0.0021031	0.024314	-0.029667	0.0068773	-0.020294	-0.087842	-0.040558	0.00031946	-0.059335	-0.041949	0.0005238	-0.0076267	-0.013902	0.0067482	0.051235	0.049222	0.039477	0.038631	-0.016316	0.0015897	-0.011664
2781	-0.03233	-0.01707	0.50532	-0.0039585	-0.035571	-0.051437	0.011784	-0.018962	0.083964	0.014341	-0.044054	0.0068819	-0.013609	0.042924	-0.026552	-0.025203	-0.02006	-0.02006	0.11654	-0.0047237	-0.0032594	0.030068	0.01091	-0.0021093	0.0054424	0.048875	0.023834	-0.043065	0.0016769	0.024648	-0.028743	0.0044737	-0.02308	-0.088388	-0.042325	1.86e-05	-0.060732	-0.042295	0.0034731	-0.0089068	-0.016288	0.0056847	0.048701	0.050296	0.059495	0.036561	-0.016563	0.022474	-0.0098948
2596	-0.019405	-0.010845	0.54792	-0.0096536	-0.017208	-0.035423	-0.014989	0.0094341	0.022485	0.0044099	-0.015684	0.012938	-0.005935	0.047664	-0.040083	-0.014119	-0.017985	-0.017985	0.10119	0.0070698	-0.01649	0.019852	-0.020493	-0.025976	0.00096683	0.041476	0.01408	-0.036427	0.027269	0.012248	-0.017782	0.016801	0.001208	-0.077735	-0.038505	-0.025825	-0.023983	-0.012156	-0.012331	-0.0094222	-0.0043174	0.041588	0.048644	0.0036739	0.036929	0.059356	-0.034133	-0.02353	-0.014077
6507	-0.015969	-0.023637	0.45822	-0.029158	-0.057682	-0.077059	-0.027797	-0.091552	0.034465	-0.022129	-0.059822	-0.032302	-0.042957	-0.050791	-0.056418	-0.0044694	-0.030898	-0.030898	0.12588	-0.019475	-0.053781	0.015653	-0.038735	-0.0098912	-0.02415	0.035494	0.022202	-0.093729	-0.013294	0.036739	-0.074583	-0.041524	-0.052423	-0.16024	-0.077847	-0.026501	-0.10692	-0.050114	-0.061145	-0.054043	-0.050109	0.0040005	0.0087666	0.015566	0.075808	-0.054023	-0.038806	-0.054092	-0.0033988
10243	-0.030513	-0.017638	0.72015	-0.029033	-0.020704	-0.057732	-0.017152	-0.028745	0.02112	0.0083485	-0.024534	-0.0089981	0.0026749	0.047287	-0.038726	-0.024991	-0.00879	-0.00879	0.12306	-0.0073348	-0.025289	0.035236	-0.020462	-0.031925	-0.0079176	0.033997	0.0014255	-0.054158	-0.016526	0.012828	-0.029056	0.0011451	-0.013002	-0.095355	-0.052934	-0.029014	-0.05234	-0.035565	-0.012405	-0.025307	-0.0020833	0.02553	0.045724	0.0096675	0.01962	0.040048	-0.036757	-0.035375	-0.023195
3760	-0.021334	-0.020523	0.50192	-0.0066782	-0.047295	-0.058272	-0.019098	-0.04699	0.021339	-0.013335	-0.03982	-0.0059188	-0.030056	0.006841	-0.05893	-0.0045758	-0.01904	-0.01904	0.12337	-0.0053191	-0.046459	0.013655	-0.033606	-0.012629	-0.0099445	0.041946	0.021539	-0.057995	0.064078	0.042559	-0.053376	-0.0035797	-0.02809	-0.11898	-0.074772	-0.031336	-0.076533	-0.035898	-0.035144	-0.031671	-0.017361	0.026359	0.0070739	-0.011381	0.073941	0.030599	-0.027462	-0.028337	0.0085067
28964	-0.019405	-0.010845	0.54792	-0.0096536	-0.017208	-0.035423	-0.014989	0.0094341	0.022485	0.0044099	-0.015684	0.012938	-0.005935	0.047664	-0.040083	-0.014119	-0.017985	-0.017985	0.10119	0.0070698	-0.01649	0.019852	-0.020493	-0.025976	0.00096683	0.041476	0.01408	-0.036427	0.027269	0.012248	-0.017782	0.016801	0.001208	-0.077735	-0.038505	-0.025825	-0.023983	-0.012156	-0.012331	-0.0094222	-0.0043174	0.041588	0.048644	0.0036739	0.036929	0.059356	-0.034133	-0.02353	-0.014077
2741	-0.012441	-0.023459	0.47842	-0.0056278	-0.048023	-0.058056	-0.018206	-0.049858	0.033872	-0.0055514	-0.044141	0.00077219	-0.032624	0.00045372	-0.059266	0.0070509	-0.024634	-0.024634	0.12415	-0.005694	-0.037963	0.017954	-0.03662	-0.0073324	-0.010128	0.051855	0.036881	-0.058009	0.012368	0.044049	-0.060774	-0.0092947	-0.024375	-0.11889	-0.067515	-0.021273	-0.080924	-0.042393	-0.01654	-0.030967	-0.0099084	0.027828	0.010551	-0.0010362	0.090562	0.03034	-0.036904	-0.0026095	0.020618
6536	-0.01741	-0.022925	0.37041	-0.032489	-0.069507	-0.08135	-0.029093	-0.11008	0.030949	-0.034783	-0.066122	-0.043525	-0.055184	-0.073801	-0.058538	-0.011014	-0.028578	-0.028578	0.13444	-0.02095	-0.064488	0.0099152	-0.037217	0.0032848	-0.015155	0.026751	0.021069	-0.10156	0.021322	0.043927	-0.077073	-0.047278	-0.068207	-0.17739	-0.087993	-0.026188	-0.13055	-0.059387	-0.079784	-0.057041	-0.063672	-0.0088625	-0.0067288	0.0099307	0.087657	-0.08607	-0.03008	-0.06747	-0.0016551
2887	-0.023848	-0.017044	0.58179	-0.0054873	-0.02618	-0.037597	-0.018015	0.00015849	0.02735	0.0040579	-0.025684	0.0038037	-0.011181	0.049618	-0.040631	-0.0061084	-0.015973	-0.015973	0.10337	-0.0044305	-0.021055	0.016668	-0.026198	-0.02227	-0.0044247	0.039355	0.015863	-0.038251	0.024049	0.019626	-0.024213	0.010798	0.003517	-0.076155	-0.049178	-0.028468	-0.036721	-0.022173	-0.0050397	-0.022439	0.0027063	0.040216	0.031039	-0.00038783	0.046472	0.064959	-0.03506	-0.014619	-0.0020706
79571	-0.019405	-0.010845	0.54792	-0.0096536	-0.017208	-0.035423	-0.014989	0.0094341	0.022485	0.0044099	-0.015684	0.012938	-0.005935	0.047664	-0.040083	-0.014119	-0.017985	-0.017985	0.10119	0.0070698	-0.01649	0.019852	-0.020493	-0.025976	0.00096683	0.041476	0.01408	-0.036427	0.027269	0.012248	-0.017782	0.016801	0.001208	-0.077735	-0.038505	-0.025825	-0.023983	-0.012156	-0.012331	-0.0094222	-0.0043174	0.041588	0.048644	0.0036739	0.036929	0.059356	-0.034133	-0.02353	-0.014077
9743	-0.019405	-0.010845	0.54792	-0.0096536	-0.017208	-0.035423	-0.014989	0.0094341	0.022485	0.0044099	-0.015684	0.012938	-0.005935	0.047664	-0.040083	-0.014119	-0.017985	-0.017985	0.10119	0.0070698	-0.01649	0.019852	-0.020493	-0.025976	0.00096683	0.041476	0.01408	-0.036427	0.027269	0.012248	-0.017782	0.016801	0.001208	-0.077735	-0.038505	-0.025825	-0.023983	-0.012156	-0.012331	-0.0094222	-0.0043174	0.041588	0.048644	0.0036739	0.036929	0.059356	-0.034133	-0.02353	-0.014077
7184	-0.02488	-0.018054	0.58296	-0.0079566	-0.02582	-0.034181	-0.019742	0.0010465	0.027999	0.0050809	-0.02507	0.0046539	-0.010714	0.052953	-0.041989	-0.0071895	-0.016701	-0.016701	0.10554	-0.001793	-0.019444	0.016758	-0.026418	-0.019936	-0.0037617	0.040614	0.015545	-0.04036	0.019523	0.018724	-0.024938	0.011481	0.0015379	-0.076566	-0.047333	-0.024783	-0.036197	-0.021296	-0.0017888	-0.021027	0.0033129	0.040264	0.031311	0.0012888	0.046134	0.06851	-0.036694	-0.011384	-0.0026597
3055	-0.021684	-0.012209	0.57399	-0.0057652	-0.021584	-0.039	-0.02173	0.003928	0.025518	0.0070058	-0.025406	-0.0010322	-0.0072191	0.050641	-0.042168	-0.0072458	-0.016396	-0.016396	0.10435	0.006965	-0.024224	0.020566	-0.031029	-0.021377	-0.005996	0.036036	0.014384	-0.043273	0.015662	0.015629	-0.023212	0.01686	0.0074818	-0.077178	-0.048614	-0.027834	-0.032457	-0.01943	-0.0045328	-0.014092	0.0060136	0.043227	0.030882	-0.0026891	0.046114	0.073538	-0.036418	-0.0146	0.016443
3208	-0.02624	-0.017204	0.61652	-0.014253	-0.027673	-0.039839	-0.017062	-0.0093455	0.029598	0.0039272	-0.027263	0.0055345	-0.0090165	0.052587	-0.041773	-0.01085	-0.014569	-0.014569	0.11484	-0.0046073	-0.017567	0.023931	-0.020654	-0.021576	-0.0026367	0.041788	0.014226	-0.043551	0.011572	0.018378	-0.027629	0.0068783	-0.0056888	-0.086847	-0.045944	-0.022277	-0.042731	-0.024737	-0.0045493	-0.021317	-0.0017523	0.035958	0.035817	0.0094083	0.042791	0.054495	-0.03765	-0.014225	-0.011257
9455	0	0	0	0	0	0	0	0	0	0	0	0	0	0	0	0	0	0	0	0	0	0	0	0	0	0	0	0	0	0	0	0	0	0	0	0	0	0	0	0	0	0	0	0	0	0	0	0	0
5502	-0.022271	-0.019383	0.58732	-0.0048163	-0.0273	-0.039159	-0.019089	-0.0012016	0.028344	0.0046235	-0.025412	0.0039283	-0.010589	0.050153	-0.041344	-0.0043121	-0.015407	-0.015407	0.1045	-0.0054732	-0.02116	0.017048	-0.026616	-0.020328	-0.0053755	0.040047	0.017073	-0.037566	0.02063	0.021309	-0.026328	0.010803	0.0023363	-0.07515	-0.049227	-0.024569	-0.038702	-0.023823	-0.00096264	-0.02293	0.0050118	0.04182	0.028508	0.0010379	0.048467	0.068774	-0.034056	-0.0109	0.00089473
5798	-0.022139	-0.013825	0.54071	-0.005932	-0.027481	-0.041966	-0.01314	-0.00077169	0.040059	0.0065081	-0.026122	0.0064701	-0.01391	0.050759	-0.043969	-0.008188	-0.012985	-0.012985	0.10266	0.0023314	-0.016274	0.020229	-0.019289	-0.022498	0.0015094	0.044565	0.018799	-0.034787	0.013709	0.019243	-0.026294	0.0069603	-0.00234	-0.080061	-0.047246	-0.028308	-0.038335	-0.022739	-0.0038705	-0.014173	-0.0025271	0.037017	0.041209	0.015437	0.052921	0.062201	-0.032813	-0.0067567	-0.0081295
3611	-0.022663	-0.015303	0.56622	-0.0063049	-0.022868	-0.038834	-0.021428	0.0041032	0.02602	0.0073256	-0.023619	0.0016525	-0.0030468	0.051224	-0.039513	-0.0060709	-0.015922	-0.015922	0.10311	0.0047891	-0.022781	0.021053	-0.029314	-0.017527	-0.004286	0.037974	0.016937	-0.040679	0.018986	0.016999	-0.021761	0.020485	0.0042694	-0.076283	-0.048573	-0.0263	-0.034069	-0.02079	-0.00045822	-0.012771	0.0062768	0.044314	0.028555	-0.0015185	0.045239	0.074521	-0.03435	-0.01308	0.013192
5055	-0.015791	-0.022411	0.64816	-0.02523	-0.024127	-0.054012	-0.01717	-0.021336	0.021217	-7.31e-05	-0.02378	0.0025904	-0.0013719	0.034967	-0.044642	-0.01707	-0.011765	-0.011765	0.12543	-0.0017833	-0.0273	0.027263	-0.021557	-0.024166	-0.0082653	0.047177	0.010643	-0.047163	5.75e-05	0.018532	-0.037006	0.0015897	-0.01887	-0.091783	-0.049158	-0.022055	-0.046551	-0.030376	-0.013875	-0.021275	-0.0067798	0.036041	0.035617	0.01433	0.044634	0.039017	-0.033751	-0.013367	-0.018831
51447	0	0	0	0	0	0	0	0	0	0	0	0	0	0	0	0	0	0	0	0	0	0	0	0	0	0	0	0	0	0	0	0	0	0	0	0	0	0	0	0	0	0	0	0	0	0	0	0	0
8826	-0.022719	-0.0218	0.58962	-0.0052812	-0.027076	-0.038699	-0.020181	-0.0030907	0.026456	0.0037644	-0.026278	0.0048852	-0.010611	0.049435	-0.041442	-0.0041576	-0.015586	-0.015586	0.11337	-0.0053646	-0.021898	0.015923	-0.025704	-0.019128	-0.0049948	0.040232	0.017109	-0.036689	0.019121	0.021274	-0.025312	0.011734	-0.00053948	-0.07438	-0.048819	-0.022502	-0.03889	-0.023832	0.0024297	-0.022609	0.0039986	0.0425	0.028103	0.0016723	0.059755	0.067457	-0.034807	0.00030837	0.0025473
8660	-0.023099	-0.015902	0.58078	-0.0057002	-0.024176	-0.03875	-0.020633	0.0014394	0.026791	0.0057985	-0.025593	0.0011337	-0.007982	0.051362	-0.041968	-0.0063209	-0.016034	-0.016034	0.10491	0.0003916	-0.023063	0.018767	-0.029237	-0.020004	-0.005371	0.038053	0.016106	-0.040714	0.017551	0.01775	-0.024084	0.014559	0.0055866	-0.076296	-0.049266	-0.027003	-0.035679	-0.021884	-0.0025758	-0.018686	0.0054425	0.042902	0.029604	-0.0017035	0.046298	0.071558	-0.034409	-0.013052	0.0083618
9479	-0.022295	-0.018396	0.57842	-0.0050421	-0.026461	-0.038361	-0.018942	0.00096321	0.02767	0.0061251	-0.023804	0.0063905	-0.0099334	0.049621	-0.040828	-0.0052877	-0.015948	-0.015948	0.10329	-0.003662	-0.01963	0.016802	-0.026296	-0.020329	-0.0040896	0.040232	0.017267	-0.037629	0.021938	0.020297	-0.024763	0.013104	0.00096346	-0.075479	-0.047141	-0.023465	-0.036146	-0.021988	-0.0004983	-0.019766	0.0037949	0.042369	0.031403	0.0022552	0.047161	0.068731	-0.034164	-0.011456	-0.00033271
2897	-0.0043783	-0.010929	0.24632	-0.02128	-0.052603	-0.071764	-0.0097955	-0.072258	0.03261	-0.020788	-0.046652	-0.0060272	-0.04415	-0.031929	-0.078053	-0.008433	-0.019149	-0.019149	0.10924	0.029041	-0.049351	0.017195	-0.028286	-0.01745	-0.0054596	0.052961	0.029294	-0.060929	0.020314	0.042048	-0.078199	-0.044877	-0.052558	-0.15215	-0.073305	-0.035544	-0.092198	-0.038584	-0.055423	-0.018093	-0.043883	0.0049963	0.022436	0.022888	0.10158	-0.026772	-0.034501	-0.013033	-0.015494
3831	-0.02391	-0.019651	0.58971	-0.0049126	-0.027282	-0.03878	-0.017947	-0.0016753	0.029056	0.0045681	-0.024469	0.003732	-0.0090489	0.054041	-0.040623	-0.0048498	-0.016175	-0.016175	0.10505	-0.0066764	-0.020714	0.017828	-0.026201	-0.019329	-0.0044127	0.041328	0.016891	-0.038195	0.019416	0.021195	-0.026324	0.012221	0.0015356	-0.076193	-0.048237	-0.023792	-0.039564	-0.024521	-0.00036765	-0.021881	0.0029629	0.043132	0.029671	0.00050074	0.046405	0.070756	-0.03465	-0.012163	0.00057778
3761	-0.021444	-0.019198	0.50947	-0.0065677	-0.045085	-0.056947	-0.018682	-0.042121	0.020556	-0.011908	-0.03823	-0.004214	-0.028245	0.011077	-0.057704	-0.0047701	-0.020265	-0.020265	0.12207	-0.0046449	-0.044205	0.013694	-0.032634	-0.013881	-0.0091204	0.042986	0.021123	-0.056218	0.061308	0.040487	-0.050692	-0.001222	-0.025019	-0.11605	-0.072311	-0.03182	-0.072286	-0.033751	-0.032834	-0.030457	-0.015802	0.027217	0.011388	-0.01041	0.071685	0.032892	-0.02764	-0.028101	0.0068946
3766	-0.021412	-0.020533	0.50551	-0.0066692	-0.046684	-0.057671	-0.019117	-0.045614	0.021769	-0.012698	-0.039605	-0.0055875	-0.029554	0.0082044	-0.058354	-0.0045393	-0.019081	-0.019081	0.12329	-0.005375	-0.0456	0.013822	-0.033418	-0.012835	-0.009599	0.042059	0.021517	-0.057425	0.062538	0.041944	-0.052535	-0.0031443	-0.027141	-0.11773	-0.074053	-0.031066	-0.075422	-0.035578	-0.033931	-0.031493	-0.016732	0.026885	0.007698	-0.010917	0.073379	0.031833	-0.02774	-0.027781	0.0083666
4986	-0.019405	-0.010845	0.54792	-0.0096536	-0.017208	-0.035423	-0.014989	0.0094341	0.022485	0.0044099	-0.015684	0.012938	-0.005935	0.047664	-0.040083	-0.014119	-0.017985	-0.017985	0.10119	0.0070698	-0.01649	0.019852	-0.020493	-0.025976	0.00096683	0.041476	0.01408	-0.036427	0.027269	0.012248	-0.017782	0.016801	0.001208	-0.077735	-0.038505	-0.025825	-0.023983	-0.012156	-0.012331	-0.0094222	-0.0043174	0.041588	0.048644	0.0036739	0.036929	0.059356	-0.034133	-0.02353	-0.014077
10256	-0.023775	-0.016527	0.58205	-0.0062133	-0.026168	-0.037597	-0.018132	-8.85e-05	0.027268	0.0038261	-0.025764	0.0037843	-0.011167	0.049483	-0.040388	-0.0063821	-0.015788	-0.015788	0.10372	-0.0042638	-0.021162	0.016888	-0.026204	-0.022416	-0.0041642	0.039327	0.015512	-0.038738	0.024312	0.019217	-0.024186	0.010646	0.003197	-0.077086	-0.049252	-0.029099	-0.036896	-0.022201	-0.0061078	-0.022249	0.002126	0.039979	0.031429	-0.0002516	0.04578	0.063561	-0.035299	-0.015826	-0.0028306
3736	-0.0088705	-0.022879	0.28169	-0.017401	-0.071319	-0.078371	-0.014463	-0.11281	0.018375	-0.033556	-0.068131	-0.027789	-0.054342	-0.076429	-0.065125	0.00013133	-0.025027	-0.025027	0.14032	-0.013594	-0.069649	0.013473	-0.034464	0.0066933	-0.0074926	0.038108	0.031197	-0.086707	0.05104	0.06035	-0.093575	-0.039052	-0.069924	-0.17497	-0.083284	-0.022562	-0.13142	-0.061006	-0.071465	-0.043062	-0.052906	-0.0060131	-0.02738	-0.011256	0.10264	-0.079709	-0.017634	-0.041843	0.019025
3737	-0.0075779	-0.020416	0.21348	-0.014147	-0.072081	-0.077329	-0.013841	-0.11803	0.011949	-0.038788	-0.066319	-0.027689	-0.057327	-0.08559	-0.067458	-0.00024466	-0.021436	-0.021436	0.12871	-0.0093482	-0.073955	0.0076708	-0.035035	0.0087116	-0.013997	0.032017	0.028683	-0.085036	0.087188	0.065863	-0.09477	-0.038151	-0.072702	-0.17362	-0.085935	-0.025889	-0.1329	-0.058351	-0.078251	-0.041607	-0.05507	-0.0096897	-0.032174	-0.019535	0.1004	-0.086735	-0.012726	-0.044925	0.019809
3739	0	0	0	0	0	0	0	0	0	0	0	0	0	0	0	0	0	0	0	0	0	0	0	0	0	0	0	0	0	0	0	0	0	0	0	0	0	0	0	0	0	0	0	0	0	0	0	0	0
3750	-0.011276	-0.021541	0.21181	-0.018832	-0.070192	-0.075673	-0.016442	-0.1185	0.0081382	-0.044195	-0.061603	-0.030829	-0.056025	-0.088692	-0.069989	-0.0078476	-0.016417	-0.016417	0.12074	-0.0078017	-0.077305	0.0054886	-0.035852	0.0065193	-0.017987	0.022875	0.021308	-0.085237	0.11521	0.064149	-0.087989	-0.037841	-0.076315	-0.17527	-0.091627	-0.031681	-0.13263	-0.056022	-0.087028	-0.042442	-0.060129	-0.012031	-0.030428	-0.02243	0.095565	-0.08589	-0.015486	-0.05535	0.0090978
3751	-0.021519	-0.019687	0.49987	-0.0054492	-0.047198	-0.058146	-0.019384	-0.047064	0.021362	-0.013891	-0.041336	-0.0060121	-0.030216	0.0069741	-0.057205	-0.0044745	-0.019877	-0.019877	0.12544	-0.0048382	-0.045645	0.01255	-0.032597	-0.011615	-0.0090989	0.042623	0.022265	-0.057598	0.069056	0.043507	-0.052438	-0.0020013	-0.027779	-0.11853	-0.073409	-0.030598	-0.075725	-0.035024	-0.035668	-0.031325	-0.017643	0.027154	0.0080064	-0.011961	0.072774	0.028325	-0.02532	-0.030152	0.0094677
3897	0	0	0	0	0	0	0	0	0	0	0	0	0	0	0	0	0	0	0	0	0	0	0	0	0	0	0	0	0	0	0	0	0	0	0	0	0	0	0	0	0	0	0	0	0	0	0	0	0
23365	-0.018369	-0.011935	0.54354	-0.0071738	-0.014983	-0.033327	-0.012782	0.012359	0.021307	0.0053826	-0.013202	0.016011	-0.005666	0.048882	-0.038899	-0.013575	-0.01729	-0.01729	0.097731	0.0070857	-0.015912	0.019516	-0.019728	-0.027464	0.00032542	0.04017	0.013626	-0.033127	0.028767	0.012934	-0.016414	0.018783	0.0035783	-0.071259	-0.034389	-0.023088	-0.018817	-0.0075244	-0.011169	-0.0085806	-0.0017012	0.043541	0.048895	0.0028831	0.038007	0.062896	-0.033507	-0.021398	-0.013564
51176	-0.018518	-0.021376	0.55016	-0.0078087	-0.021665	-0.032343	-0.019076	0.0069059	0.030913	0.0060521	-0.021771	0.013026	-0.0074181	0.058082	-0.044672	-0.0059228	-0.014652	-0.014652	0.10936	0.0062928	-0.013259	0.017092	-0.022837	-0.02117	0.0045458	0.047622	0.022795	-0.027625	0.021792	0.015431	-0.020016	0.01035	0.001776	-0.068739	-0.039473	-0.023285	-0.025045	-0.015354	0.0064609	-0.011934	0.0031911	0.0464	0.042747	0.016239	0.05431	0.081808	-0.033034	0.0013858	-0.0069801
28992	-0.029876	-0.019584	0.63467	-0.0069706	-0.02773	-0.043886	-0.014862	-0.0085133	0.035156	0.0075028	-0.027637	0.0018653	-0.0083819	0.05978	-0.037351	-0.011249	-0.014506	-0.014506	0.10596	-0.010878	-0.020613	0.022726	-0.020294	-0.021026	-0.0063993	0.039277	0.012013	-0.041387	0.011581	0.02098	-0.028033	0.011182	-0.0013452	-0.079462	-0.050531	-0.019439	-0.04665	-0.030749	-0.0018321	-0.025235	0.0021163	0.033323	0.032999	0.0039413	0.034063	0.065495	-0.034407	-0.01811	-0.0058681
775	-0.022917	-0.022022	0.48935	-0.0033167	-0.046099	-0.057928	-0.021424	-0.050992	0.020519	-0.01434	-0.043884	-0.0044469	-0.033931	0.0042151	-0.060323	-0.0021312	-0.019821	-0.019821	0.12611	-0.0058619	-0.047629	0.0074465	-0.03535	-0.011025	-0.013754	0.039059	0.021424	-0.059339	0.078716	0.047058	-0.053619	-0.0058136	-0.025008	-0.11739	-0.075579	-0.033261	-0.072738	-0.032839	-0.038425	-0.035229	-0.018744	0.027218	0.0083227	-0.017452	0.070842	0.024861	-0.029549	-0.031197	0.010429
1128	-0.038585	-0.010665	0.45155	-0.0039337	-0.03755	-0.055454	0.024357	-0.022984	0.12719	0.015605	-0.034892	0.012269	-0.0068145	0.041504	-0.0056129	-0.050391	-0.015128	-0.015128	0.086229	-0.0083001	0.022624	0.048763	0.053791	0.014076	0.0058498	0.046256	0.024898	-0.04451	-0.0191	0.026905	-0.016253	0.0077115	-0.040023	-0.086358	-0.025686	0.033391	-0.070993	-0.056462	0.004818	-0.0037889	-0.010617	-0.012948	0.079963	0.0837	-0.0095334	0.0045801	-0.0027555	-0.010663	-0.025019
1129	0	0	0	0	0	0	0	0	0	0	0	0	0	0	0	0	0	0	0	0	0	0	0	0	0	0	0	0	0	0	0	0	0	0	0	0	0	0	0	0	0	0	0	0	0	0	0	0	0
1132	0	0	0	0	0	0	0	0	0	0	0	0	0	0	0	0	0	0	0	0	0	0	0	0	0	0	0	0	0	0	0	0	0	0	0	0	0	0	0	0	0	0	0	0	0	0	0	0	0
498000	0	0	0	0	0	0	0	0	0	0	0	0	0	0	0	0	0	0	0	0	0	0	0	0	0	0	0	0	0	0	0	0	0	0	0	0	0	0	0	0	0	0	0	0	0	0	0	0	0
4130	-0.023045	-0.01961	0.61451	-0.0089588	-0.027735	-0.042894	-0.017407	-0.0095959	0.028399	0.0035949	-0.027453	0.0013492	-0.0095997	0.047225	-0.042128	-0.0063763	-0.01447	-0.01447	0.11105	-0.0066994	-0.022793	0.019956	-0.024666	-0.022263	-0.0054218	0.040621	0.01531	-0.041775	0.015098	0.02109	-0.030374	0.0065333	-0.0018824	-0.0823	-0.051192	-0.027318	-0.044194	-0.027485	-0.0056256	-0.025316	-0.00031337	0.038006	0.031064	0.0035786	0.048406	0.05913	-0.035167	-0.014644	-0.0045756
4131	-0.023045	-0.01961	0.61451	-0.0089588	-0.027735	-0.042894	-0.017407	-0.0095959	0.028399	0.0035949	-0.027453	0.0013492	-0.0095997	0.047225	-0.042128	-0.0063763	-0.01447	-0.01447	0.11105	-0.0066994	-0.022793	0.019956	-0.024666	-0.022263	-0.0054218	0.040621	0.01531	-0.041775	0.015098	0.02109	-0.030374	0.0065333	-0.0018824	-0.0823	-0.051192	-0.027318	-0.044194	-0.027485	-0.0056256	-0.025316	-0.00031337	0.038006	0.031064	0.0035786	0.048406	0.05913	-0.035167	-0.014644	-0.0045756
4133	-0.022847	-0.019347	0.60916	-0.0082137	-0.027235	-0.042094	-0.01719	-0.0077926	0.028164	0.0042107	-0.026589	0.0027098	-0.0097684	0.0473	-0.041934	-0.006509	-0.014945	-0.014945	0.10949	-0.0058977	-0.021706	0.019653	-0.024262	-0.02194	-0.0049997	0.04094	0.01577	-0.041085	0.016286	0.020955	-0.029357	0.0083815	-0.0018679	-0.081318	-0.049766	-0.025913	-0.042507	-0.026527	-0.0045357	-0.02386	-0.00032947	0.038068	0.032224	0.0038529	0.048135	0.060235	-0.034881	-0.014078	-0.0043394
4155	0	0	0	0	0	0	0	0	0	0	0	0	0	0	0	0	0	0	0	0	0	0	0	0	0	0	0	0	0	0	0	0	0	0	0	0	0	0	0	0	0	0	0	0	0	0	0	0	0
4207	0	0	0	0	0	0	0	0	0	0	0	0	0	0	0	0	0	0	0	0	0	0	0	0	0	0	0	0	0	0	0	0	0	0	0	0	0	0	0	0	0	0	0	0	0	0	0	0	0
10746	-0.025831	-0.011622	0.61219	-0.010108	-0.019054	-0.041273	-0.023304	0.0037181	0.022731	0.012456	-0.023834	-0.0043948	0.0018463	0.053315	-0.038483	-0.01264	-0.014652	-0.014652	0.10663	0.0075545	-0.024307	0.024456	-0.032876	-0.023523	-0.0067508	0.032347	0.011045	-0.046478	0.0054962	0.010892	-0.019037	0.020739	0.0089615	-0.077187	-0.049026	-0.02931	-0.032153	-0.022393	-0.0029344	-0.012983	0.0095305	0.043006	0.030893	-0.0032539	0.032156	0.077923	-0.036492	-0.020346	0.014577
8491	-0.021506	-0.014704	0.57076	-0.0066367	-0.021143	-0.039656	-0.023	0.003937	0.025674	0.0076203	-0.024071	-0.0014368	-0.002378	0.051944	-0.040686	-0.0057938	-0.015416	-0.015416	0.10362	0.0075457	-0.025034	0.022902	-0.030906	-0.016586	-0.0059032	0.036423	0.016274	-0.04264	0.014512	0.016362	-0.022242	0.021405	0.0054737	-0.075994	-0.049571	-0.02553	-0.033989	-0.02106	0.00033241	-0.011971	0.0092463	0.044687	0.026533	-0.0032334	0.045785	0.078416	-0.034887	-0.012761	0.019045
50488	-0.021506	-0.014704	0.57076	-0.0066367	-0.021143	-0.039656	-0.023	0.003937	0.025674	0.0076203	-0.024071	-0.0014368	-0.002378	0.051944	-0.040686	-0.0057938	-0.015416	-0.015416	0.10362	0.0075457	-0.025034	0.022902	-0.030906	-0.016586	-0.0059032	0.036423	0.016274	-0.04264	0.014512	0.016362	-0.022242	0.021405	0.0054737	-0.075994	-0.049571	-0.02553	-0.033989	-0.02106	0.00033241	-0.011971	0.0092463	0.044687	0.026533	-0.0032334	0.045785	0.078416	-0.034887	-0.012761	0.019045
4215	-0.02218	-0.013196	0.57371	-0.0067245	-0.021814	-0.039054	-0.021599	0.0030346	0.025332	0.0066171	-0.025415	-0.0012717	-0.006245	0.05092	-0.041818	-0.0074771	-0.016098	-0.016098	0.10485	0.0058083	-0.024638	0.02084	-0.030823	-0.020492	-0.005931	0.035796	0.014993	-0.043424	0.015342	0.015598	-0.022164	0.016989	0.0074607	-0.077324	-0.049331	-0.02861	-0.033108	-0.020198	-0.0044711	-0.015206	0.0069686	0.043221	0.029596	-0.0031294	0.045412	0.07304	-0.035771	-0.015654	0.013991
4216	-0.02218	-0.013196	0.57371	-0.0067245	-0.021814	-0.039054	-0.021599	0.0030346	0.025332	0.0066171	-0.025415	-0.0012717	-0.006245	0.05092	-0.041818	-0.0074771	-0.016098	-0.016098	0.10485	0.0058083	-0.024638	0.02084	-0.030823	-0.020492	-0.005931	0.035796	0.014993	-0.043424	0.015342	0.015598	-0.022164	0.016989	0.0074607	-0.077324	-0.049331	-0.02861	-0.033108	-0.020198	-0.0044711	-0.015206	0.0069686	0.043221	0.029596	-0.0031294	0.045412	0.07304	-0.035771	-0.015654	0.013991
4771	-0.019405	-0.010845	0.54792	-0.0096536	-0.017208	-0.035423	-0.014989	0.0094341	0.022485	0.0044099	-0.015684	0.012938	-0.005935	0.047664	-0.040083	-0.014119	-0.017985	-0.017985	0.10119	0.0070698	-0.01649	0.019852	-0.020493	-0.025976	0.00096683	0.041476	0.01408	-0.036427	0.027269	0.012248	-0.017782	0.016801	0.001208	-0.077735	-0.038505	-0.025825	-0.023983	-0.012156	-0.012331	-0.0094222	-0.0043174	0.041588	0.048644	0.0036739	0.036929	0.059356	-0.034133	-0.02353	-0.014077
2917	-0.021382	-0.0077568	0.482	-0.016664	-0.026129	-0.03765	-0.013902	0.0050887	0.032421	0.0047776	-0.02154	0.011799	-0.017344	0.057872	-0.050857	-0.01375	-0.011072	-0.011072	0.10076	0.014829	-0.010284	0.019362	-0.014181	-0.029378	0.012789	0.045029	0.016646	-0.031212	0.0042521	0.0092777	-0.021661	0.002011	-0.0060266	-0.081401	-0.040544	-0.035678	-0.027851	-0.011391	-0.0031617	-0.00058374	-0.0085547	0.037088	0.055707	0.034841	0.064585	0.052918	-0.035591	0.0028921	-0.026263
320	-0.019405	-0.010845	0.54792	-0.0096536	-0.017208	-0.035423	-0.014989	0.0094341	0.022485	0.0044099	-0.015684	0.012938	-0.005935	0.047664	-0.040083	-0.014119	-0.017985	-0.017985	0.10119	0.0070698	-0.01649	0.019852	-0.020493	-0.025976	0.00096683	0.041476	0.01408	-0.036427	0.027269	0.012248	-0.017782	0.016801	0.001208	-0.077735	-0.038505	-0.025825	-0.023983	-0.012156	-0.012331	-0.0094222	-0.0043174	0.041588	0.048644	0.0036739	0.036929	0.059356	-0.034133	-0.02353	-0.014077
11221	-0.042823	-0.020915	0.68793	-0.015101	-0.032386	-0.063537	0.0022362	-0.038094	0.065216	0.013339	-0.037491	-0.0037551	-0.0026331	0.052914	-0.026398	-0.029454	-0.012389	-0.012389	0.11434	-0.021222	-0.014533	0.039894	0.0042751	-0.01175	-0.0068266	0.039495	0.0064942	-0.051294	-0.017704	0.022888	-0.037822	0.0044013	-0.028137	-0.095819	-0.05193	0.00070835	-0.071122	-0.053283	-0.005474	-0.028844	-0.010933	-0.00025584	0.047584	0.029245	0.0069905	0.034018	-0.026457	-0.02494	-0.023655
4294	-0.023139	-0.014214	0.58888	-0.0095121	-0.017005	-0.040606	-0.02243	0.0035089	0.023447	0.010457	-0.021797	-0.0027502	-0.00034419	0.053018	-0.042685	-0.011733	-0.014494	-0.014494	0.10392	0.0099171	-0.024482	0.024423	-0.031149	-0.022395	-0.005533	0.0348	0.01285	-0.043143	0.0045133	0.011444	-0.020753	0.016964	0.008099	-0.078557	-0.047002	-0.028882	-0.031885	-0.020787	-0.00093662	-0.010667	0.0053719	0.044392	0.034201	0.00023497	0.041036	0.076585	-0.035296	-0.016935	0.012944
79092	-0.018327	-0.010612	0.54369	-0.0096986	-0.016536	-0.034449	-0.015472	0.010865	0.021038	0.0039235	-0.014524	0.013224	-0.005101	0.048507	-0.040108	-0.014175	-0.017901	-0.017901	0.099852	0.0072509	-0.016449	0.019636	-0.020626	-0.026773	0.00063687	0.041975	0.01394	-0.03482	0.027234	0.011816	-0.017145	0.016594	0.0026245	-0.076154	-0.036983	-0.025611	-0.022173	-0.011428	-0.012196	-0.0088856	-0.0040082	0.042427	0.048747	0.0033781	0.035928	0.060944	-0.033683	-0.024	-0.014471
4988	-0.019421	-0.0074806	0.47711	-0.010702	-0.024066	-0.039217	-0.0097608	0.0061509	0.039126	0.0083946	-0.021334	0.01321	-0.01685	0.055487	-0.045473	-0.0088831	-0.009362	-0.009362	0.099121	0.013015	-0.007685	0.019672	-0.01259	-0.0299	0.014466	0.04642	0.021696	-0.027035	0.0093794	0.01447	-0.018916	0.0050542	-0.0036693	-0.078451	-0.036644	-0.033332	-0.027223	-0.012207	-0.0022037	-0.0011239	-0.0080297	0.03888	0.056915	0.032553	0.061895	0.056415	-0.031662	-0.00020476	-0.020215
8649	-0.019405	-0.010845	0.54792	-0.0096536	-0.017208	-0.035423	-0.014989	0.0094341	0.022485	0.0044099	-0.015684	0.012938	-0.005935	0.047664	-0.040083	-0.014119	-0.017985	-0.017985	0.10119	0.0070698	-0.01649	0.019852	-0.020493	-0.025976	0.00096683	0.041476	0.01408	-0.036427	0.027269	0.012248	-0.017782	0.016801	0.001208	-0.077735	-0.038505	-0.025825	-0.023983	-0.012156	-0.012331	-0.0094222	-0.0043174	0.041588	0.048644	0.0036739	0.036929	0.059356	-0.034133	-0.02353	-0.014077
8428	-0.021534	-0.013595	0.574	-0.0064157	-0.020978	-0.039322	-0.02275	0.0036568	0.025558	0.0080066	-0.024905	-0.0019066	-0.0045591	0.052124	-0.042195	-0.0068952	-0.015965	-0.015965	0.10541	0.0076277	-0.024893	0.021623	-0.031707	-0.018747	-0.0061086	0.035669	0.015554	-0.043954	0.011895	0.015637	-0.022586	0.018759	0.0074588	-0.076426	-0.048772	-0.026169	-0.032743	-0.020355	-0.0014754	-0.01377	0.0085811	0.044478	0.028637	-0.0032744	0.046253	0.077639	-0.035535	-0.013698	0.018136
10497	-0.021862	-0.013799	0.60926	-0.022001	-0.029827	-0.052486	-0.0099142	-0.029201	0.036692	0.0043542	-0.031281	0.0012476	-0.0089538	0.037784	-0.049264	-0.012315	-0.0079353	-0.0079353	0.12431	-0.00026385	-0.021942	0.030869	-0.01578	-0.028087	0.0021127	0.047614	0.016953	-0.04516	-0.0089613	0.019775	-0.040189	-0.0086733	-0.019974	-0.10439	-0.05013	-0.031143	-0.053171	-0.030737	-0.01465	-0.017951	-0.016348	0.029488	0.045883	0.028617	0.05958	0.033961	-0.037955	-0.0080777	-0.024039
282000	0	0	0	0	0	0	0	0	0	0	0	0	0	0	0	0	0	0	0	0	0	0	0	0	0	0	0	0	0	0	0	0	0	0	0	0	0	0	0	0	0	0	0	0	0	0	0	0	0
4593	-0.016253	0.012649	0.60454	-0.023327	-0.00074735	-0.050425	-0.026654	0.0033486	0.011345	0.016959	-0.018633	-0.01945	0.01256	0.038386	-0.04166	-0.028789	-0.013212	-0.013212	0.11278	0.056539	-0.034138	0.040763	-0.034588	-0.033661	-0.010918	0.016673	-0.0056636	-0.068424	-0.022492	-0.0056773	-0.024004	0.026218	0.0047134	-0.095892	-0.045488	-0.033771	-0.02239	-0.012275	-0.026653	0.021866	-0.0039404	0.03117	0.046469	-0.00069697	0.019448	0.056457	-0.044548	-0.035054	0.030964
9220	-0.025567	-0.016328	0.65734	-0.022707	-0.026063	-0.051904	-0.013442	-0.02629	0.027716	0.0025118	-0.027353	-0.00075673	-0.0028543	0.03963	-0.04287	-0.015082	-0.012088	-0.012088	0.12396	-0.0066028	-0.024671	0.030699	-0.017798	-0.026484	-0.003944	0.04268	0.011482	-0.050768	-7.78e-05	0.018701	-0.036805	-0.0015238	-0.018397	-0.10131	-0.050513	-0.026384	-0.053203	-0.03121	-0.016516	-0.02331	-0.013954	0.03127	0.04343	0.016067	0.04484	0.037476	-0.03745	-0.022059	-0.021012
25924	-0.026454	-0.017492	0.58688	-0.0069796	-0.028169	-0.032622	-0.021946	-9.81e-05	0.026847	0.0035561	-0.026845	0.0053489	-0.012786	0.051309	-0.042101	-0.0072213	-0.017358	-0.017358	0.10366	-0.0041613	-0.021558	0.01651	-0.028328	-0.017696	-0.0044601	0.037921	0.01457	-0.044223	0.019237	0.01775	-0.028027	0.013617	0.0040021	-0.078566	-0.048791	-0.025514	-0.037893	-0.021576	-0.0014376	-0.023269	0.0017286	0.038578	0.026609	-0.0015702	0.04671	0.06499	-0.039047	-0.011539	-0.0017069
2035	-0.022195	-0.019414	0.58841	-0.0063118	-0.025997	-0.038171	-0.018605	-0.0013464	0.028423	0.0038253	-0.024802	0.0040821	-0.0097678	0.05021	-0.041385	-0.0053348	-0.015232	-0.015232	0.10515	-0.0047327	-0.020399	0.017729	-0.025865	-0.019172	-0.0048966	0.040876	0.016826	-0.037685	0.019606	0.020376	-0.026265	0.010428	0.00088343	-0.075964	-0.048137	-0.025073	-0.038779	-0.023887	-0.0018397	-0.022556	0.0027595	0.041439	0.030803	0.0014016	0.048021	0.066791	-0.034431	-0.012356	-0.00094035
4671	-0.02334	-0.018408	0.5819	-0.0056715	-0.026489	-0.038782	-0.019167	0.000592	0.027782	0.0039092	-0.02492	0.003722	-0.0076643	0.050605	-0.039361	-0.0046426	-0.015212	-0.015212	0.10286	-0.0038149	-0.021405	0.018745	-0.026017	-0.018736	-0.0040652	0.040081	0.016609	-0.037134	0.025438	0.020228	-0.02416	0.014285	0.0019204	-0.075593	-0.050305	-0.027322	-0.038491	-0.023307	-0.0021701	-0.02044	0.0044988	0.041307	0.028124	-0.00015856	0.045819	0.067505	-0.03425	-0.012781	-0.00023797
85407	-0.019405	-0.010845	0.54792	-0.0096536	-0.017208	-0.035423	-0.014989	0.0094341	0.022485	0.0044099	-0.015684	0.012938	-0.005935	0.047664	-0.040083	-0.014119	-0.017985	-0.017985	0.10119	0.0070698	-0.01649	0.019852	-0.020493	-0.025976	0.00096683	0.041476	0.01408	-0.036427	0.027269	0.012248	-0.017782	0.016801	0.001208	-0.077735	-0.038505	-0.025825	-0.023983	-0.012156	-0.012331	-0.0094222	-0.0043174	0.041588	0.048644	0.0036739	0.036929	0.059356	-0.034133	-0.02353	-0.014077
1000	-0.023645	-0.014858	0.57784	-0.0075601	-0.024808	-0.037275	-0.017785	0.0018014	0.02616	0.0031825	-0.024928	0.0047394	-0.010676	0.048815	-0.040145	-0.0078201	-0.01609	-0.01609	0.10279	-0.0029914	-0.021129	0.016938	-0.026006	-0.023758	-0.0034827	0.039597	0.014739	-0.039015	0.026596	0.017721	-0.022899	0.010639	0.0031347	-0.077631	-0.048485	-0.030896	-0.034217	-0.020432	-0.0092247	-0.021299	0.00077882	0.039187	0.03384	-0.00073051	0.04378	0.060885	-0.035802	-0.018667	-0.0057331
4690	-0.022881	-0.016739	0.57691	-0.0054859	-0.024996	-0.036793	-0.017016	0.0016844	0.026881	0.0045103	-0.024364	0.0053256	-0.010859	0.049412	-0.040754	-0.0068491	-0.016286	-0.016286	0.10225	-0.003385	-0.020145	0.016904	-0.025486	-0.02217	-0.003922	0.039483	0.01576	-0.037917	0.024164	0.019305	-0.023312	0.011958	0.0032999	-0.075541	-0.047081	-0.027182	-0.034745	-0.020741	-0.0048789	-0.020825	0.0020509	0.04022	0.033083	0.00023547	0.046155	0.065464	-0.034802	-0.014822	-0.0019823
23413	-0.024932	-0.016755	0.58706	-0.0075425	-0.027998	-0.034858	-0.020032	-0.00071459	0.027247	0.0041947	-0.026663	0.0031903	-0.011539	0.054655	-0.041816	-0.0068706	-0.016521	-0.016521	0.10468	-0.0043658	-0.020934	0.016754	-0.026539	-0.020624	-0.0046157	0.039291	0.014465	-0.04194	0.020401	0.019327	-0.026193	0.010864	0.003328	-0.077238	-0.04954	-0.026331	-0.038731	-0.022616	-0.0031831	-0.022872	0.0030538	0.039061	0.027602	-0.00071217	0.044656	0.065028	-0.036457	-0.01347	-0.0018374
1991	-0.030195	-0.020398	0.6245	-0.0049506	-0.02767	-0.042348	-0.013025	-0.0086224	0.035549	0.0082295	-0.026918	0.0070389	-0.00914	0.055893	-0.037803	-0.011517	-0.015306	-0.015306	0.10454	-0.010626	-0.020108	0.022184	-0.019339	-0.020546	-0.006237	0.040945	0.012551	-0.040949	0.01164	0.022131	-0.028117	0.016851	-0.0045319	-0.079638	-0.046492	-0.01227	-0.045297	-0.029602	0.00011572	-0.022001	0.0004715	0.033157	0.03368	0.0046612	0.036226	0.06714	-0.034483	-0.016858	-0.0034558
55607	0	0	0	0	0	0	0	0	0	0	0	0	0	0	0	0	0	0	0	0	0	0	0	0	0	0	0	0	0	0	0	0	0	0	0	0	0	0	0	0	0	0	0	0	0	0	0	0	0
8506	-0.022491	-0.015384	0.58412	-0.010328	-0.027632	-0.042218	-0.015607	-0.0071217	0.03075	0.0051342	-0.027241	0.0041026	-0.011407	0.048022	-0.044159	-0.0080799	-0.013625	-0.013625	0.10965	-0.0010659	-0.020208	0.020928	-0.021779	-0.024001	-0.00027269	0.043006	0.017642	-0.039613	0.013828	0.019446	-0.028735	0.0067572	-0.0038983	-0.084515	-0.04842	-0.028946	-0.040635	-0.023863	-0.006015	-0.018445	-0.0040986	0.037997	0.038366	0.012088	0.053441	0.058421	-0.035135	-0.010587	-0.0088398
4763	-0.024017	-0.020773	0.59022	-0.0055778	-0.026881	-0.037688	-0.01941	-0.0026415	0.027148	0.0030568	-0.026777	0.0036733	-0.010492	0.050506	-0.041053	-0.0046624	-0.01523	-0.01523	0.11025	-0.0066463	-0.021191	0.016296	-0.025791	-0.020271	-0.0045025	0.040608	0.016928	-0.036355	0.020644	0.020755	-0.024176	0.010275	0.0026541	-0.074524	-0.049029	-0.02568	-0.03919	-0.023976	0.00047409	-0.023829	0.0029789	0.041879	0.029553	0.00027102	0.056025	0.066626	-0.034904	-0.0053572	0.00091889
22871	-0.024176	-0.013829	0.59021	-0.01197	-0.026705	-0.043661	-0.013818	-0.0084805	0.02805	0.0054	-0.026999	0.0043492	-0.010952	0.046404	-0.0439	-0.011499	-0.013798	-0.013798	0.11104	-9.83e-05	-0.019985	0.022164	-0.019915	-0.025662	0.0009005	0.041925	0.015764	-0.041328	0.013432	0.017492	-0.028109	0.0062416	-0.0050953	-0.088182	-0.048064	-0.031657	-0.040238	-0.023432	-0.010224	-0.016924	-0.0079738	0.035444	0.042778	0.013628	0.050071	0.050953	-0.035256	-0.014764	-0.01481
4744	-0.025567	-0.016328	0.65734	-0.022707	-0.026063	-0.051904	-0.013442	-0.02629	0.027716	0.0025118	-0.027353	-0.00075673	-0.0028543	0.03963	-0.04287	-0.015082	-0.012088	-0.012088	0.12396	-0.0066028	-0.024671	0.030699	-0.017798	-0.026484	-0.003944	0.04268	0.011482	-0.050768	-7.78e-05	0.018701	-0.036805	-0.0015238	-0.018397	-0.10131	-0.050513	-0.026384	-0.053203	-0.03121	-0.016516	-0.02331	-0.013954	0.03127	0.04343	0.016067	0.04484	0.037476	-0.03745	-0.022059	-0.021012
4741	-0.022105	-0.01927	0.59256	-0.0062693	-0.027012	-0.039241	-0.018706	-0.0031395	0.028451	0.0032764	-0.025831	0.0025763	-0.010236	0.049639	-0.041808	-0.0049406	-0.015035	-0.015035	0.10602	-0.0053568	-0.02176	0.017402	-0.026508	-0.021204	-0.005422	0.040223	0.015933	-0.038868	0.019523	0.020627	-0.027418	0.0089101	0.0019565	-0.076899	-0.04979	-0.027033	-0.040246	-0.024793	-0.0036122	-0.0241	0.0028275	0.041025	0.029766	0.00068588	0.048557	0.065144	-0.034713	-0.013621	-0.0013189
9368	-0.022893	-0.015675	0.5724	-0.0061467	-0.0239	-0.037304	-0.016079	0.0034668	0.025959	0.0047138	-0.023043	0.0069119	-0.0093965	0.048958	-0.041529	-0.0079627	-0.017477	-0.017477	0.10244	-0.0023756	-0.019447	0.016871	-0.024789	-0.022742	-0.0019344	0.040837	0.016094	-0.03741	0.0232	0.018349	-0.022898	0.013008	0.0024185	-0.076207	-0.044867	-0.026324	-0.033197	-0.019471	-0.004851	-0.019241	0.00060936	0.03965	0.036535	0.0011467	0.046245	0.065128	-0.033932	-0.01515	-0.0034348
2903	-0.026454	-0.017492	0.58688	-0.0069796	-0.028169	-0.032622	-0.021946	-9.81e-05	0.026847	0.0035561	-0.026845	0.0053489	-0.012786	0.051309	-0.042101	-0.0072213	-0.017358	-0.017358	0.10366	-0.0041613	-0.021558	0.01651	-0.028328	-0.017696	-0.0044601	0.037921	0.01457	-0.044223	0.019237	0.01775	-0.028027	0.013617	0.0040021	-0.078566	-0.048791	-0.025514	-0.037893	-0.021576	-0.0014376	-0.023269	0.0017286	0.038578	0.026609	-0.0015702	0.04671	0.06499	-0.039047	-0.011539	-0.0017069
4987	-0.0090121	0.0026144	0.32471	-0.02082	-0.016852	-0.045577	0.0087032	0.0056939	0.045607	0.0083724	-0.0097229	0.023138	-0.0092538	0.045477	-0.050203	-0.01958	-0.0034107	-0.0034107	0.093802	0.038923	0.0059726	0.026463	0.0022379	-0.041407	0.03095	0.053108	0.022264	-0.010814	-0.019287	0.0075841	-0.015686	-0.011439	-0.017159	-0.08625	-0.023061	-0.033757	-0.020884	-0.0037631	-0.0095621	0.019934	-0.022091	0.027453	0.089263	0.067042	0.063923	0.026911	-0.024676	0.0066405	-0.054569
4897	-0.018966	-0.010605	0.54474	-0.0096023	-0.016695	-0.034809	-0.015304	0.01076	0.021906	0.0042602	-0.014971	0.01344	-0.0054854	0.047982	-0.040052	-0.014023	-0.017905	-0.017905	0.099808	0.0071852	-0.016569	0.019345	-0.020767	-0.026505	0.0007895	0.041551	0.013831	-0.035529	0.027895	0.011863	-0.017265	0.016901	0.0018279	-0.076634	-0.038131	-0.025763	-0.022735	-0.011471	-0.012111	-0.0089483	-0.0039148	0.042279	0.048681	0.0029584	0.036455	0.060386	-0.034173	-0.023828	-0.014231
9518	0	0	0	0	0	0	0	0	0	0	0	0	0	0	0	0	0	0	0	0	0	0	0	0	0	0	0	0	0	0	0	0	0	0	0	0	0	0	0	0	0	0	0	0	0	0	0	0	0
774	-0.024055	-0.016155	0.58183	-0.0065283	-0.026258	-0.037643	-0.018054	-0.00019783	0.027051	0.0036418	-0.025564	0.0038443	-0.01098	0.049419	-0.040284	-0.0066508	-0.015796	-0.015796	0.10367	-0.003731	-0.021177	0.016886	-0.026228	-0.022855	-0.0041147	0.039272	0.015269	-0.039144	0.025767	0.019048	-0.023987	0.010741	0.0030512	-0.077779	-0.049558	-0.029851	-0.036772	-0.021948	-0.0072451	-0.021574	0.0014528	0.040186	0.031794	-0.00033192	0.045153	0.062653	-0.035529	-0.016775	-0.0036591
7533	-0.023183	-0.016166	0.57336	-0.0055662	-0.024906	-0.036786	-0.017917	0.0026676	0.026185	0.0051052	-0.024097	0.0059252	-0.010215	0.049171	-0.04069	-0.007285	-0.017234	-0.017234	0.10325	-0.0021867	-0.01956	0.016545	-0.025842	-0.022026	-0.0028046	0.040341	0.016449	-0.037736	0.024373	0.018353	-0.022746	0.012654	0.0025168	-0.075915	-0.046322	-0.027302	-0.033749	-0.020291	-0.0046544	-0.020091	0.0014459	0.040226	0.034667	0.00084752	0.044838	0.066011	-0.034667	-0.015099	-0.0030251
[truncated: 660 more rows]
[truncated: 916 more columns]
