# Supplementary material for: Drug repositioning by applying ‘expression profiles’ generated by integrating chemical structure similarity and gene semantic similarity
Source: Royal Society of Chemistry journal article supplement (doi:10.1039/c3mb70554d), 2014-02-13
Supplement: c3mb70554d7.xlsx [file c3mb70554d7.xlsx]

## Sheet: The result of module mining
The first level of the code indicates the anatomical main group
Code	Contents
A	Alimentary tract and metabolism
B	Blood and blood forming organs
C	Cardiovascular system
D	Dermatologicals
G	Genito-urinary system and sex hormones
H	Systemic hormonal preparations, excluding sex hormones and insulins
J	Antiinfectives for systemic use
L	Antineoplastic and immunomodulating agents
M	Musculo-skeletal system
N	Nervous system
P	Antiparasitic products, insecticides and repellents
R	Respiratory system
S	Sensory organs
V	Various
U	The ATC code is unknown
The first category:the clusters contain drugs with known ATC codes.				The proportins of every attribute to all attribute in a cluster
No of Cluster	Drugs within cluster	Code	Drug's indications
14	Aminosalicylic Acid	J04AA01	For the treatment of tuberculosis
	Bethanechol	N07AB02	For the treatment of acute postoperative and postpartum nonobstructive (functional) urinary retention and for neurogenic atony of the urinary bladder with retention.
	Sevoflurane	N01AB08	Used for induction and maintenance of general anesthesia in adult and pediatric patients for inpatient and outpatient surgery
	L-Aspartic Acid	B03AA09	There is no support for the claim that aspartates are exercise performance enhancers, i.e. ergogenic aids
	Propafenone	C01BC03	Used to prolong the time to recurrence of paroxysmal atrial fibrillation/flutter (PAF) associated with disabling symptoms in patients without structural heart disease. Also used for the treatment of life-threatening documented ventricular arrhythmias, such as sustained ventricular tachycardia
	Trospium	G04BD09	For the treatment of overactive bladder with symptoms of urge urinary incontinence, urgency, and urinary frequency, detrusor instability and frequency of micturition
	Pyridoxine	A11HA02	For the treatment of vitamin B6 deficiency and for the prophylaxis of isoniazid-induced peripheral neuropathy
	Quinidine	C01BA01	For the treatment of ventricular pre-excitation and cardiac dysrhythmias
	Menthol	M02AX10，R02AA20	Used to treat occasional minor irritation, pain, sore mouth, and sore throat as well as cough associated with a cold or inhaled irritants
	Lofexidine	N07BC04	Investigated for use/treatment in addictions and substance abuse
	Colchicine	M04AC01	For treatment and relief of pain in attacks of acute gouty arthritis
	Hydroxyurea	L01XX05	For management of melanoma, resistant chronic myelocytic leukemia, and recurrent, metastatic, or inoperable carcinoma of the ovary and Sickle-cell anemia
	Trimethadione	N03AC02	Used in the control of absence (petit mal) seizures that are refractory to treatment with other medications
	Allopurinol	M04AA01	For the treatment of hyperuricemia associated with primary or secondary gout. Also indicated for the treatment of primary or secondary uric acid nephropathy, with or without the symptoms of gout, as well as chemotherapy-induced hyperuricemia and recurrent renal calculi
17	Naloxone	V03AB15	For the complete or partial reversal of narcotic depression, including respiratory depression, induced by opioids including natural and synthetic narcotics, propoxyphene, methadone and the narcotic-antagonist analgesics: nalbuphine, pentazocine and butorphanol
	Ixabepilone	L01DC04	Investigated for use/treatment in breast cancer, head and neck cancer, melanoma, lung cancer, lymphoma (non-hodgkin's), prostate cancer, renal cell carcinoma, and cancer/tumors (unspecified)
	Isradipine	C08CA03	For the management of mild to moderate essential hypertension. It may be used alone or concurrently with thiazide-type diuretics
	Nisoldipine	C08CA07	For the treatment of hypertension. It may be used alone or in combination with other antihypertensive agents
	Felodipine	C08CA02	For the treatment of mild to moderate essential hypertension
19	Glycopyrrolate	A03AB02	For use as a preoperative antimuscarinic to reduce salivary, tracheobronchial, and pharyngeal secretions, to reduce the volume and free acidity of gastric secretions and to block cardiac vagal inhibitory reflexes during induction of anesthesia and intubation
	Nortriptyline	N06AA10	For the treatment of depression, chronic pain, irritable bowel syndrome, sleep disorders, diabetic neuropathy, agitation and insomnia, and migraine prophylaxis
	Perhexiline	C08EX02	For the management of severe angina pectoris
	Milnacipran	N06AX17	Milnacipran is used to treat moderate to severe clinical depression and chronic pain
22	Yohimbine	G04BE04	Indicated as a sympatholytic and mydriatic. Impotence has been successfully treated with yohimbine in male patients with vascular or diabetic origins and psychogenic origins
	Nandrolone phenpropionate	A14AB01，S01XA11	For the treatment of refractory deficient red cell production anemias, breast carcinoma, hereditary angioedema, antithrombin III deficiency, fibrinogen excess, growth failure and Turner's syndrome. It is also indicated in the prophylaxis of hereditary angioedema
	Moxifloxacin	J01MA14，S01AX22	For the treatment of sinus and lung infections such as sinusitis, pneumonia, and secondary infections in chronic bronchitis. Also for the treatment of bacterial conjunctivitis (pinkeye)
	Pipecuronium	M03AC06	Used as a muscle relaxant during anesthesia and surgical procedures
24	Aminocaproic Acid	B02AA01	For use in the treatment of excessive postoperative bleeding
	Fomepizole	V03AB34	Antizol is indicated as an antidote for ethylene glycol (such as antifreeze) or methanol poisoning, or for use in suspected ethylene glycol or methanol ingestion, either alone or in combination with hemodialysis
	Betazole	V04CG02	For use clinically to test gastric secretory function
	L-Lysine	B05XB03	Supplemental L-lysine has putative anti-herpes simplex virus activity. There is preliminary research suggesting that it may have some anti-osteoporotic activity
	Enflurane	N01AB04	Used for the induction and maintenance of general anaesthesia during surgery and cesarean section and also used for analgesia during vaginal delivery
27	Imipramine	N06AA02，N06AA03，N06AA06	For the relief of symptoms of depression and as temporary adjunctive therapy in reducing enuresis in children aged 6 years and older. May also be used to manage panic disorders, with or without agoraphobia, as a second line agent in ADHD, management of eating disorders, for short-term management of acute depressive episodes in bipolar disorder and schizophrenia, and for symptomatic treatment of p…
	Sertindole	N05AE03	Used in the treatment of schizophrenia
	Dibucaine	C05AD04，D04AB02，N01BB06，S02DA04，S01HA06	For production of local or regional anesthesia by infiltration techniques such as percutaneous injection and intravenous regional anesthesia by peripheral nerve block techniques such as brachial plexus and intercostal and by central neural techniques such as lumbar and caudal epidural blocks
	Propiomazine	N05CM06	Propiomazine is largely used for its antihistamininc sleep inducing effects in treating insomnia
28	Voglibose	A10BF03	For the treatment of diabetes. It is specifically used for lowering post-prandial blood glucose levels thereby reducing the risk of macrovascular complications
	Doxazosin	C02CA04	For treatment and management of mild to moderate hypertension and urinary obstruction symptoms caused by BPH
	Gemcitabine	L01BC05	For the first-line treatment of patients with metastatic breast cancer, locally advanced (Stage IIIA or IIIB), or metastatic (Stage IV) non-small cell lung cancer and as first-line treatment for patients with adenocarcinoma of the pancreas
	Zoledronate	M05BA08	For the treatment of hypercalcemia of malignancy. Also for the treatment of patients with multiple myeloma and patients with documented bone metastases from solid tumors, in conjunction with standard antineoplastic therapy. In May of 2007, the drug was approved for treatment of Paget’s Disease
	Haloperidol	N05AD01	For the management of psychotic disorders (eg. schizophrenia) and delirium, as well as to control tics and vocal utterances of Tourette's syndrome (Gilles de la Tourette's syndrome). Also used for the treatment of severe behavioural problems in children with disrubtive behaviour disorder or ADHD (attention-deficit hyperactivity disorder). Haloperidol has been used in the prevention and control of…
	Risperidone	N05AX08	For the treatment of schizophrenia in adults and in adolescents, ages 13 to 17, and for the short-term treatment of manic or mixed episodes of bipolar I disorder in children and adolescents ages 10 to 17. May also be used to manage symptoms of inappropriate behavior due to aggression and/or psychosis in patients with severe dementia
29	Bupropion	N07BA02	For the treatment of depression and as aid to smoking cessation
	Enalapril	C09AA02	For the treatment of essential or renovascular hypertension and symptomatic congestive heart failure. It may be used alone or in combination with thiazide diuretics
	Gamma Hydroxybutyric Acid	N01AX11, N07XX04	Used as a general anesthetic, to treat conditions such as insomnia, clinical depression, narcolepsy, and alcoholism, and to improve athletic performance
	Isoetharine	R03AC07，R03CC06	For the treatment of asthma, wheezing, and chronic asthmatic bronchitis
	Mecamylamine	C02BB01	For the treatment of moderately severe to severe essential hypertension and in uncomplicated cases of malignant hypertension
	Mercaptopurine	L01BB02	For remission induction and maintenance therapy of acute lymphatic leukemia
	Sumatriptan	N02CC01	For the treatment of migraine attacks with or without aura
30	Prednisolone	A07EA01，H02AB04，H02AB06，S01BA04，S01CB02，S02BA03，S03BA02，H02AB07，C05AA04，D07AA01，D07AA03，D07AC14，D07XA02，D10AA02，R01AD02，	For the treatment of primary or secondary adrenocortical insufficiency, such as congenital adrenal hyperplasia, thyroiditis. Also used to treat psoriatic arthritis, rheumatoid arthritis, ankylosing spondylitis, bursitis, acute gouty arthritis and epicondylitis. Also indicated for treatment of systemic lupus erythematosus, pemphigus and acute rhematic carditis. Can be used in the treatment of leuk…
	Fluticasone Propionate	D07AC17，R01AD08，R03BA05	For the maintenance treatment of asthma as prophylactic therapy and for patients requiring oral corticosteroid therapy for asthma
	Eplerenone	C03DA04	For improvement of survival of stable patients with left ventricular systolic dysfunction (ejection fraction <40%) and clinical evidence of congestive heart failure after an acute myocardial infarction
31	Pyrimethamine	P01BD01	For the treatment of toxoplasmosis and acute malaria; For the prevention of malaria in areas non-resistant to pyrimethamine
	Amrinone	C01CE01	Used in the treatment of congestive heart failure
	Pentostatin	L01XX08	For the treatment of hairy cell leukaemia refractory to alpha interferon
32	Phenacemide	N03AX07	Used to control certain seizures in the treatment of epilepsy
	Pyridostigmine	N07AA02	For the treatment of myasthenia gravis
	Diethylcarbamazine	P02CB02	Used for the treatment of individual patients with certain filarial diseases including tropical pulmonary eosinophilia, loiasis, and lymphatic filariasis caused by infection with Wuchereria bancrofti, Brugia malayi, or Brugia timori.
33	Lumiracoxib	M01AH06	For the acute and chronic treatment of the signs and symptoms of osteoarthritis of the knee in adults.
	Ketoprofen	M01AE03，M01AE17，M02AA10	For symptomatic treatment of acute and chronic rheumatoid arthritis, osteoarthritis, ankylosing spondylitis, primary dysmenorrhea and mild to moderate pain associated with musculotendinous trauma (sprains and strains), postoperative (including dental surgery) or postpartum pain.
	Mefenamic acid	M01AG01	For the treatment of rheumatoid arthritis, osteoarthritis, dysmenorrhea, and mild to moderate pain, inflammation, and fever
34	Dipivefrin	S01EA02	Dipivefrin is a prodrug which is used as initial therapy for the control of intraocular pressure in chronic open-angle glaucoma
	Eprosartan	C09CA02	For the management of hypertension alone or in combination with other classes of antihypertensive agents. Also used as a first-line agent in the treatment of diabetic nephropathy, as well as a second-line agent in the treatment of congestive heart failure (only in those intolerant of ACE inhibitors).
	Butorphanol	N02AF01	For the relief of moderate to severe pain
35	Theobromine	C03BD01，R03DA07	theobromine is used as a vasodilator, a diuretic, and heart stimulant. And similar to caffeine, it may be useful in management of fatigue and orthostatic hypotension
	Menadione	B02BA02	The primary known function of vitamin K is to assist in the normal clotting of blood, but it may also play a role in normal bone calcification
	Caffeine	N06BC01，N02BE01	For management of fatigue, orthostatic hypotension, and for the short term treatment of apnea of prematurity in infants
37	Ergonovine	G02AB03	Used to treat postpartum haemorrhage and postabortion haemorrhage in patients with uterine atony
	Nicergoline	C04AE02	For the treatment of senile dementia, migraines of vascular origin, transient ischemia, platelet hyper-aggregability, and macular degeneration
	Frovatriptan	N02CC07	For the acute treatment of migraine attacks with or without aura in adults
38	Disopyramide	C01BA03	For the treatment of documented ventricular arrhythmias, such as sustained ventricular tachycardia, ventricular pre-excitation and cardiac dysrhythmias. It is a Class Ia antiarrhythmic drug
	Fenoldopam	C01CA19	For the in-hospital, short-term (up to 48 hours) management of severe hypertension when rapid, but quickly reversible, emergency reduction of blood pressure is clinically indicated, including malignant hypertension with deteriorating end-organ function
	Mefloquine	P01BC02	For the treatment of mild to moderate acute malaria caused by Mefloquineuine-susceptible strains of Plasmodium falciparum (both chloroquine-susceptible and resistant strains) or by Plasmodium vivax. Also for the prophylaxis of Plasmodium falciparum and Plasmodium vivax malaria infections, including prophylaxis of chloroquine-resistant strains of Plasmodium falciparum
39	Propericiazine	N05AC01	For use as adjunctive medication in some psychotic patients. Propericiazine (Pericyazine)is used for the control of residual prevailing hostility, impulsiveness and aggressiveness
	Pipotiazine	N05AC04	For the maintenance treatment of chronic non-agitated schizophrenic patients
	Prochlorperazine	N05AB04	For the symptomatic management of psychotic disorders, short term management of nonpsychotic anxiety in patients with generalized anxiety disorder, and for the control of severe nausea and vomiting of various causes
40	Nicotine	N07BA01，A11HA01，C04AC01，C10AD02	For the relief of nicotine withdrawal symptoms and as an aid to smoking cessation.
	Alendronate	M05BA04	For the treatment and prevention of osteoporosis in women and Paget's disease of bone in both men and women.
	Captopril	C09AA01	For the treatment of essential or renovascular hypertension (usually administered with other drugs, particularly thiazide diuretics). May be used to treat congestive heart failure in combination with other drugs (e.g. cardiac glycosides, diuretics, β-adrenergic blockers). May improve survival in patients with left ventricular dysfunction following myocardial infarction. May be used to treat nephr…
41	Repaglinide	A10BX02	For the treatment of non-insulin dependent-diabetes mellitus in conjunction with diet and exercise.
	Pramipexole	N04BC05	For the treatment of signs and symptoms of idiopathic Parkinson's disease
	Bromocriptine	G02CB01，N04BC01	For the treatment of galactorrhea due to hyperprolactinemia, prolactin-dependent menstrual disorders and infertility, prolactin-secreting adenomas, prolactin-dependent male hypogonadism, as adjunct therapy to surgery or radiotherapy for acromegaly or as monotherapy is special cases, as monotherapy in early Parksinsonian Syndrome or as an adjunct with levodopa in advanced cases with motor complica…
The second category: the Clusters contain drugs with unknown ATC codes.					The proportins of every attribute to all attribute in a cluster
No of Cluster	Drugs without ATC codes in the cluster	Drugs with ATC codes in the cluster	Code	Drug's indications
3	Levomethadyl Acetate	Adinazolam	N05BA07	For the treatment of anxiety and status epilepticus
	Clotiazepam	Meperidine	N02AB02	Used to control moderate to severe pain
	Ridogrel	Fludiazepam	N05BA17	Used for the short-term treatment of anxiety disorders.
	Cilastatin	Bromazepam	N05BA08	For the short-term treatment of insomnia, short-term treatment of anxiety or panic attacks, if a benzodiazepine is required, and the alleviation of the symptoms of alcohol- and opiate-withdrawal
		Alprazolam	N05BA12	For the management of anxiety disorder or the short-term relief of symptoms of anxiety and for the treatment of panic disorder, with or without agoraphobia
		Midazolam	N05CD08	For use as a sedative perioperatively
		Nitrazepam	N05CD03, N05CD02	Used to treat short-term sleeping problems (insomnia), such as difficulty falling asleep, frequent awakenings during the night, and early-morning awakening
		Lorazepam	N05BA06	For the management of anxiety disorders, and for treatment of status epilepticus
		Temazepam	N05CD07	For the short-term treatment of insomnia (generally 7-10 days).
		Fosphenytoin	N03AB05	For the control of generalized convulsive status epilepticus and prevention and treatment of seizures occurring during neurosurgery. It can also be substituted, short-term, for oral phenytoin
		Diazepam	N05BA01, N05BA17	Used in the treatment of severe anxiety disorders, as a hypnotic in the short-term management of insomnia, as a sedative and premedicant, as an anticonvulsant, and in the management of alcohol withdrawal syndrome
		Oxazepam	N05BA04	For the treatment of anxiety disorders and alcohol withdrawal
		Flurazepam	N05CD01	For short-term and intermittent use in patients with recurring insomnia and poor sleeping habits
		Felbamate	N03AX10	For use only in those patients who respond inadequately to alternative treatments and whose epilepsy is so severe that a substantial risk of aplastic anemia and/or liver failure is deemed acceptable in light of the benefits conferred by its use
		Flunitrazepam	N05CD03	For short-term treatment of severe insomnias, that are not responsive to other hypnotics
		Methohexital	N01AF01, N05CA15	Methohexital is indicated for use as an intravenous anaesthetic. It has also been commonly used to induce deep sedation.
		Cinolazepam	N05CD13	For the management of anxiety disorders or for the short-term relief of the symptoms of anxiety or anxiety associated with depressive symptoms
		Clobazam	N05BA09	For treatment and management of epilepsy and anxiety disorder
		Methadone	N02AC52, N07BC02,,R05DA06	For the treatment of dry cough, drug withdrawal syndrome, opioid type drug dependence, and pain
		Ibudilast	R03DC04	For the treatment of multiple sclerosis, asthma, and cerebrovascular disease
		Doxylamine	R06AA09	Used alone as a short-term sleep aid, in combination with other drugs as a night-time cold and allergy relief drug. Also used in combination with Vitamin B6 (pyridoxine) to prevent morning sickness in pregnant women.
		Dextromethorphan	R05DA09	For treatment and relief of dry cough
		Azelaic Acid	D10AX03	For the topical treatment of mild-to-moderate inflammatory acne vulgaris
		Arformoterol	R03AC13	A bronchodilator used for the long term, symptomatic treatment of reversible bronchoconstriction in patients with chronic obstructive pulmonary disease (COPD), including chronic bronchitis and emphysema
		Tamoxifen	L02BA01	For the treatment of breast cancer
		Mycophenolate mofetil	L04AA06	For the prophylaxis of organ rejection in patients receiving allogeneic renal, cardiac or hepatic transplants. Mycophenolate mofetil should be used concomitantly with cyclosporine and corticosteroids
		Raltitrexed	L01BA03	For the treatment of malignant neoplasm of colon and rectum
		Masoprocol	L01XX10	Used for the treatment of actinic keratoses (precancerous skin growths that can become malignant if left untreated)
		Irinotecan	L01XX19	For the treatment of metastatic colorectal cancer (first-line therapy when administered with 5-fluorouracil and leucovorin). Also used in combination with cisplatin for the treatment of extensive small cell lung cancer. Irinotecan is currently under investigation for the treatment of metastatic or recurrent cervical cancer
		Phenylbutazone	M01AA01	For the treatment of backache and ankylosing spondylitis
		Fenoprofen	M01AE04	For relief of the signs and symptoms of rheumatoid arthritis and osteoarthritis. Also for the relief of mild to moderate pain.
		Propranolol	C07AA05	For the prophylaxis of migraine
		Hydroxychloroquine	P01BA02	For the suppressive treatment and treatment of acute attacks of malaria due to Plasmodium vivax, P. malariae, P. ovale, and susceptible strains of P. falciparum. It is also indicated for the treatment of discoid and systemic lupus erythematosus, and rheumatoid arthritis
		Amifostine	V03AF05	For reduction in the cumulative renal toxicity in patients with ovarian cancer (using cisplatin) and moderate to severe xerostomia in patients undergoing post-operative radiation treatment for head and neck cancer.
		Fenofibrate	C10AB05	For use as adjunctive therapy to diet to reduce elevated LDL-C, Total-C,Triglycerides and Apo B, and to increase HDL-C in adult patients with primary hypercholesterolemia or mixed dyslipidemia (Fredrickson Types IIa and IIb)
4	L-Asparagine	Gabapentin	N03AX12	For the management of postherpetic neuralgia in adults and as adjunctive therapy in the treatment of partial seizures with and without secondary generalization in patients over 12 years of age with epilepsy
	L-Proline	Pregabalin	N03AX16	For management of neuropathic pain associated with diabetic peripheral neuropathy and postherpetic neuralgia
	L-Valine	Methoxyflurane	N01AB03	For use in the induction and maintenance of general anesthesia
	Succinic acid	Vigabatrin	N03AG04	For use as an adjunctive treatment (with other drugs) in treatment resistant epilepsy, complex partial seizures, secondary generalized seizures, and for monotherapy use in infantile spasms in West syndrome
	Tetrahydrofolic acid	Salicyclic acid	D11AC30, N02BA04	Key additive in many skin-care products for the treatment of acne, psoriasis, callouses, corns, keratosis pilaris and warts
	Anisindione	Choline	N02BA03，N07AX02，R03DA02，V03AB29，S01EB09	For nutritional supplementation, also for treating dietary shortage or imbalance
		L-Glutamine	B05XB02	Used for nutritional supplementation, also for treating dietary shortage or imbalance
		Creatine	C01EB06	For nutritional supplementation, also for treating dietary shortage or imbalance
		Niacin	C04AC01, C10AD02	For the treatment of type IV and V hyperlipidemia. It is indicated as ajunctive therapy
		Clodronate	M05BA02	For the management of hypercalcemia of malignancy and as an adjunct in the management of osteolysis resulting from bone metastases of malignant tumors
		Etidronic acid	M05BA01，M05BB01	For the treatment of symptomatic Paget's disease of bone and in the prevention and treatment of heterotopic ossification following total hip replacement or due to spinal cord injury
		L-Methionine	V03AB26	Used for protein synthesis including the formation of SAMe, L-homocysteine, L-cysteine, taurine, and sulfate
		L-Cysteine	R05CB01，S01XA08，V03AB23	For the prevention of liver damage and kidney damage associated with overdoses of acetaminophen
		Rizatriptan	N02CC04	For treatment of acute migraine attacks with or without aura
		Dicumarol	B01AA01	For decreasing blood clotting. Often used along with heparin for treatment of deep vein thrombosis
		Neostigmine	N07AA01,S01EB06	Neostigmine is used for the symptomatic treatment of myasthenia gravis by improving muscle tone.
		Methsuximide	N03AD03	For the control of absence (petit mal) seizures that are refractory to other drugs
		Enoximone	C01CE03	For the treatment of congestive heart failure
		Malathion	P03AX03	For patients infected with Pediculus humanus capitis (head lice and their ova) of the scalp hair
		Tocainide	C01BB03	For the treatment of documented ventricular arrhythmias, such as sustained ventricular tachycardia, that, in the judgment of the physician, are life-threatening
		Pargyline	C02KC01, C02LL01	For the treatment of moderate to severe hypertension
		Tolbutamide	A10BB03，V04CA01	For treatment of NIDDM (non-insulin-dependent diabetes mellitus) in conjunction with diet and exercise
		Chlorpropamide	A10BB02	For treatment of NIDDM in conjunction with diet and exercise
		Dasatinib	L01XE06	For the treatment of adults with chronic, accelerated, or myeloid or lymphoid blast phase chronic myeloid leukemia with resistance or intolerance to prior therapy. Also indicated for the treatment of adults with Philadelphia chromosome-positive acute lymphoblastic leukemia with resistance or intolerance to prior therapy
		Nepafenac	S01BC10	For the treatment of pain and inflammation associated with cataract surgery.
5	Methadyl Acetate	Topiramate	N03AX11	Used for the treatment and control of partial seizures and severe tonic-clonic (grand mal) seizures and also for the prevention of migraine headaches. In children it is also used for treatment of Lennox-Gastaut syndrome
	Indecainide	Clorazepate	N05BA05	For the management of anxiety disorders or for the short-term relief of the symptoms of anxiety. Also used as adjunctive therapy in the management of partial seizures and for the symptomatic relief of acute alcohol withdrawal
	Levallorphan	Mianserin	N06AX03	For the treatment of depression
		Galantamine	N06DA04	For the treatment of mild to moderate dementia of the Alzheimer's type. Has also been investigated in patients with mild cognitive impairment who did not meet the diagnostic criteria for Alzheimer's disease
		Eszopiclone	N05CF04	For the treatment of insomnia
		Estazolam	N05CD04	For the short-term management of insomnia characterized by difficulty in falling asleep, frequent nocturnal awakenings, and/or early morning awakenings
		Chlordiazepoxide	N05BA02	For the management of anxiety disorders or for the short-term relief of symptoms of anxiety, withdrawal symptoms of acute alcoholism, and preoperative apprehension and anxiety
		Ketamine	N01AX03, N01AX14	For use as the sole anesthetic agent for diagnostic and surgical procedures that do not require skeletal muscle relaxation
		Quazepam	N05CD10	Used to treat insomnia
		Halazepam	N05BA13	Used to relieve anxiety, nervousness, and tension associated with anxiety disorders
		Triazolam	N05CD05	For the short-term treatment of insomnia
		Trimipramine	N06AA06	For the treatment of depression and depression accompanied by anxiety, agitation or sleep disturbance
		Prazepam	N05BA11	For the treatment of anxiety disorders
		Doxepin	N06AA12	Labeled indications: depression and insomnia. Unlabeled indications: chronic and neuropathic pain, anxiety, idiopathic urticaria
		Orphenadrine	M03BC01,N04AB02	Indicated for the treatment of Parkinson's disease
		Mifepristone	G03XB01	For the medical termination of intrauterine pregnancy through 49 days' pregnancy. Also indicated to control hyperglycemia secondary to hypercortisolism in adult patients with endogenous Cushing's syndrome who have type 2 diabetes mellitus or glucose intolerance
		Clotrimazole	A01AB18,D01AC01,G01AF02	For the local treatment of oropharyngeal candidiasis and vaginal yeast infections, also used in fungal infections of the skin such as ringworm, athlete's foot, and jock itch.
		Indomethacin	M01AB01,C01EB03	For moderate to severe rheumatoid arthritis including acute flares of chronic disease, ankylosing spondylitis, osteoarthritis, acute painful shoulder (bursitis and/or tendinitis) and acute gouty arthritis
		Nifedipine	C08CA05	For the management of vasospastic angina, chronic stable angina, hypertension, and Raynaud's phenomenon. May be used as a first line agent for left ventricular hypertrophy and isolated systolic hypertension (long-acting agents)
		Nitrendipine	C08CA08	For the treatment of mild to moderate hypertension
		Amlodipine	C08CA01	For the treatment of hypertension and chronic stable angina
		Alprenolol	C07AA01	For the treatment of hypertension, angina, and arrhythmia
		Carvedilol	C07AG02	For the treatment of mild or moderate (NYHA class II or III) heart failure of ischemic or cardiomyopathic origin
		Flunarizine	N07CA03	Used in the prophylaxis of migraine, occlusive peripheral vascular disease, vertigo of central and peripheral origin, and as an adjuvant in the therapy of epilepsy
		Riboflavin	A11HA04	For the treatment of ariboflavinosis (vitamin B2 deficiency)
6	Cerulenin	Thiopental	N01AF03, N05CA19	For use as the sole anesthetic agent for brief (15 minute) procedures, for induction of anesthesia prior to administration of other anesthetic agents, to supplement regional anesthesia, to provide hypnosis during balanced anesthesia with other agents for analgesia or muscle relaxation, for the control of convulsive states during or following inhalation anesthesia or local anesthesia, in neurosurg…
		Pentobarbital	N05CA01	For the short-term treatment of insomnia
		Etomidate	N01AX07	Used in the induction of general anesthesia
		Hexobarbital	N05CA16, N01AF02	For the induction of anesthesia prior to the use of other general anesthetic agents and for induction of anesthesia for short surgical, diagnostic, or therapeutic procedures associated with minimal painful stimuli.
		Aprobarbital	N05CA05
		Phenobarbital	N03AA01, N03AA02	For the treatment of all types of seizures except absence seizures
		Phenytoin	N03AB04	For the control of generalized tonic-clonic (grand mal) and complex partial (psychomotor, temporal lobe) seizures and prevention and treatment of seizures occurring during or following neurosurgery
		Diethylpropion	A08AA03	Used in the management of exogenous obesity as a short-term adjunct (a few weeks) in a regimen of weight reduction based on caloric restriction
		Doxapram	R07AB01	For use as a temporary measure in hospitalized patients with acute respiratory insufficiency superimposed on chronic obstructive pulmonary disease.
		Mirtazapine	N06AX11	For the treatment of major depressive disorder
		Promazine	N05AA03, N05AA02, N05AA01, N05AA04, N05AA05	Used as an adjunct for short term treatment of moderate and severe psychomotor agitation. Also used to treat agitation or restlessness in the elderly
		Anastrozole	L02BG03	For adjuvant treatment of hormone receptor positive breast cancer , as well as hormonal treatment of advanced breast cancer in post-menopausal women. Has also been used to treat pubertal gynecomastia and McCune-Albright syndrome; however, manufacturer states that efficacy for these indications have not been established
		Tioconazole	D01AC07,G01AF08	For the local treatment of vulvovaginal candidiasis (moniliasis)
		Oxybutynin	G04BD04	For the treatment of overactive bladder
		Maprotiline	N06AA21	For treatment of depression, including the depressed phase of bipolar depression, psychotic depression, and involutional melancholia, and may also be helpful in treating certain patients suffering severe depressive neurosis.
		Cyclobenzaprine	M03BX08	For use as an adjunct to rest and physical therapy for relief of muscle spasm associated with acute, painful musculoskeletal conditions
		Ketotifen	R06AX17,S01GX08	Indicated as an add-on or prophylactic oral medication in the chronic treatment of mild atopic asthmatic children. Also used as self-medication for the temporary relief of itching of the eye due to allergic conjunctivitis (ophthalmic)
		Reboxetine	N06AX18	For the treatment of clinical depression
		Promethazine	D04AA10, R06AD02, R06AD05	For the treatment of allergic disorders, and nausea/vomiting
		Phentolamine	C04AB01,V03AB36	Used as an aid for the diagnosis of pheochromocytoma, and may be administered immediately prior to or during pheochromocytomectomy to prevent or control paroxysmal hypertension resulting from anesthesia, stress, or operative manipulation of the tumor. Phentolamine has also been used to treat hypertensive crisis caused by sympathomimetic amines or catecholamine excess by certain foods or drugs in …
		Amitriptyline	N06AA09	For the treatment of depression, chronic pain, irritable bowel syndrome, sleep disorders, diabetic neuropathy, agitation and insomnia, and migraine prophylaxis.
		Toremifene	L02BA02	For the treatment of metastatic breast cancer in postmenopausal women with estrogen receptor-positive or receptor-unknown tumors. Toremifene is currently under investigation as a preventative agent for prostate cancer in men with high-grade prostatic intraepithelial neoplasia and no evidence of prostate cancer.
		Protriptyline	N06AA11	For the treatment of depression
		Oxaprozin	M01AE12	Used to relieve the inflammation, swelling, stiffness, and joint pain associated with rheumatoid arthritis and osteoarthritis
		Ethopropazine	N04AA05	For use in the treatment of Parkinson's disease and also used to control severe reactions to certain medicines such as reserpine
		Amoxapine	N06AA17	For the relief of symptoms of depression in patients with neurotic or reactive depressive disorders as well as endogenous and psychotic depressions. May also be used to treat depression accompanied by anxiety or agitation.
		Timolol	C07AA06，S01ED01	In its oral form it is used to treat high blood pressure and prevent heart attacks, and occasionally to prevent migraine headaches. In its opthalmic form it is used to treat open-angle and occasionally secondary glaucoma.
7	Lisdexamfetamine	Metixene	N04AA03	Used for the symptomatic treatment of parkinsonism
	Diphemanil	Atomoxetine	N06BA09	For the treatment of Attention-Deficit/Hyperactivity Disorder (ADHD) alone or in combination with behavioral treatment, as an adjunct to psychological, educational, social, and other remedial measures
	Clidinium	Progabide	N03AG05	Indicated for the treatment of epilepsy
		Procyclidine	N04AA04	For the treatment of all forms of Parkinson's Disease, as well as control of extrapyramidal reactions induced by antipsychotic agents.
		Modafinil	N06BA07	To improve wakefulness in patients with excessive daytime sleepiness (EDS) associated with narcolepsy
		Trihexyphenidyl	N04AA01	Indicated for the treatment of parkinson's disease and extrapyramidal reactions caused by drugs
		Rivastigmine	N06DA03	For the treatment of mild to moderate dementia associated with Parkinson's disease or of the Alzheimer's type
		Propoxyphene	N02AC04, N02AC54, N02AC74	For the relief of mild to moderate pain
		Mitiglinide	A10BX08	For the treatment of type 2 diabetes
		Methantheline	A03AB07	For the treatment of peptic ulcer disease, irritable bowel syndrome, pancreatitis, gastritis, biliary dyskinesia, pylorosplasm, and reflex neurogenic bladder in children
		Tridihexethyl	A03AB08	Used as an adjunct in the treatment of peptic ulcer disease and in Acquired nystagmus
		Propantheline	A03AB05	For the treatment of enuresis. It has also been used for hyperhidrosis, and cramps or spasms of the stomach, intestines or bladder
		Oxyphenonium	A03AB03	For the treatment of visceral spasms
		Mepenzolate	A03AB12	For use as adjunctive therapy in the treatment of peptic ulcer. It has not been shown to be effective in contributing to the healing of peptic ulcer, decreasing the rate of recurrence, or preventing complications
		Diphemanil Methylsulfate	A03AB15	Used in the treatment of peptic ulcer, gastric hyperacidity, and hypermotility in gastritis and pylorospasm, and in the treatment of hyperhidrosis (excessive perspiration)
		Tiotropium	R03BB04	Used in the management of chronic obstructive pulmonary disease (COPD)
		Brompheniramine	R06AB01，R06AB06	For the treatment of the symptoms of the common cold and allergic rhinitis, such as runny nose, itchy eyes, watery eyes, and sneezing
		Cyproheptadine	R06AX02	For treatment of perennial and seasonal allergic rhinitis, vasomotor rhinitis, allergic conjunctivitis due to inhalant allergens and foods, mild uncomplicated allergic skin manifestations of urticaria and angioedema, amelioration of allergic reactions to blood or plasma, cold urticaria, dermatographism, and as therapy for anaphylactic reactions adjunctive to epinephrine
		Podofilox	D06BB04	For treatment of external genital warts (Condyloma acuminatum)
		Chlorotrianisene	G03CA06	Used to treat symptoms of menopause, deficiencies in ovary function (including underdevelopment of female sexual characteristics and some types of infertility), and in rare cases, prostate cancer. Chlorotrianisene may also be used to prevent breast engorgement following childbirth.
		Cyclopentolate	S01FA04	Used mainly to produce mydriasis and cycloplegia for diagnostic purposes
		Tropicamide	S01FA06	Indicated to induce mydriasis (dilation of the pupil) and cycloplegia (paralysis of the ciliary muscle of the eye) in diagnostic procedures, such as measurement of refractive errors and examination of the fundus of the eye
		Alprostadil	C01EA01，G04BE01	For palliative, not definitive, therapy to temporarily maintain the patency of the ductus arteriosus until corrective or palliative surgery can be performed in neonates who have congenital heart defects and who depend upon the patent ductus for survival. Also for the treatment of erectile dysfunction due to neurogenic, vasculogenic, psychogenic, or mixed etiology
		Bepridil	C08EA02	For the treatment of chronic stable angina (classic effort-associated angina)
		Phenoxybenzamine	C04AX02	For the treatment of phaeochromocytoma (malignant), benign prostatic hypertrophy and malignant essential hypertension
9	Butethal	Talbutal	N05CA07	For use as a sedative and hypnotic
	Thiamylal	Secobarbital	N05CA06	For the Short-term treatment of intractable insomnia for patients habituated to barbiturates
	Butabarbital	Heptabarbital	N05CA11	Used mainly for sedation and hypnosis
		Amobarbital	N05CA02
		Methylphenobarbital	N03AA01	For the relief of anxiety, tension, and apprehension, also used as an anticonvulsant for the treatment of epilepsy.
		Clonazepam	N03AE01	Used as an anticonvulsant in the treatment of the Lennox-Gastaut syndrome (petit mal variant), akinetic and myoclonic seizures
		Mephenytoin	N03AB04	For the treatment of refractory partial epilepsy
		Tramadol	N02AX02	Indicated in the treatment of moderate to severe pain. Consider for those prone to constipation or respiratory depression. Tramadol is used to treat postoperative, dental, cancer, and acute musculosketetal pain and as an adjuvant to NSAID therapy in patients with osteoarthritis
		Glutethimide	N05CE01	For the treatment of insomnia
		Ethotoin	N03AB01	For the control of tonic-clonic (grand mal) and complex partial (psychomotor) seizures
		Oxprenolol	C07AA02	Used in the treatment of hypertension, angina pectoris, arrhythmias, and anxiety
		Dienestrol	G03CB01,G03CC02	For use in the treatment of atrophic vaginitis and kraurosis vulvae
		Aminoglutethimide	L02BG01	For the suppression of adrenal function in selected patients with Cushing's syndrome, malignant neoplasm of the female breast, and carcinoma in situ of the breast
		Clofibrate	C10AB01, C10AB03	For Primary Dysbetalipoproteinemia (Type III hyperlipidemia) that does not respond adequately to diet. This helps control high cholesterol and high triglyceride levels
		Miglustat	A16AX06	For the treatment of adult patients with mild to moderate type 1 (nonneuropathic) Gaucher's disease for whom enzyme replacement therapy is not a therapeutic option (e.g. due to constraints such as allergy, hypersensitivity, or poor venous access). Now approved in some countries for the treatment of progressive neurological symptoms in adult and pediatric patients with Niemann-Pick disease type C …
		Sparfloxacin	J01MA09	For the treatment of adults with the following infections caused by susceptible strains microorganisms: community-acquired pneumonia (caused by Chlamydia pneumoniae, Haemophilus influenzae, Haemophilus parainfluenzae, Moraxella catarrhalis, Mycoplasma pneumoniae, or Streptococcus pneumoniae) and acute bacterial exacerbations of chronic bronchitis (caused by Chlamydia pneumoniae, Enterobacter cloa…
		Chenodeoxycholic acid	A05AA01	Chenodiol is indicated for patients with radiolucent stones in well-opacifying gallbladders, in whom selective surgery would be undertaken except for the presence of increased surgical risk due to systemic disease or age. Chenodiol will not dissolve calcified (radiopaque) or radiolucent bile pigment stones
		Prazosin	C02CA01	For treatment of hypertension, symptomatic benign prostatic hyperplasia, and severe congestive heart failure. May also be used alone or in combination with β-blockers in the preoperative management of signs and symptoms of pheochromocytoma
		Calcipotriol	D05AX02	For the treatment of moderate plaque psoriasis in adults
		Levosimendan	C01CX08	For short term treatment of acutely decompensated severe chronic heart failure (CHF). Also being investigated for use/treatment in heart disease
		Methylergonovine	G02AB01	For the prevention and control of excessive bleeding following vaginal childbirth
		Ouabain	C01AC01	For the treatment of atrial fibrillation and flutter and heart failure
		Cefazolin	J01DB04	Mainly used to treat bacterial infections of the skin. It can also be used to treat moderately severe bacterial infections involving the lung, bone, joint, stomach, blood, heart valve, and urinary tract. It is clinically effective against infections caused by staphylococci and streptococci species of Gram positive bacteria. May be used for surgical prophylaxis; if required metronidazole may be ad…
		Rocuronium	M03AC09	For inpatients and outpatients as an adjunct to general anesthesia to facilitate both rapid sequence and routine tracheal intubation, and to provide skeletal muscle relaxation during surgery or mechanical ventilation.
		Nitroglycerin	C01DA02	For the prevention of angina
		Metyrapone	V04CD01	Used as a diagnostic drug for testing hypothalamic-pituitary ACTH function. Occasionally used in Cushing's syndrome
		Torasemide	C03CA01, C03CA04	For the treatment of edema associated with congestive heart failure, renal disease, or hepatic disease. Also for the treatment of hypertension alone or in combination with other antihypertensive agents
		Penbutolol	C07AA23	Used in the treatment of high blood pressure
		Paroxetine	N06AB05	Labeled indications include: major depressive disorder (MDD), panic disorder with or without agoraphobia, obsessive-compulsive disorder (OCD), social anxiety disorder (social phobia), generalized anxiety disorder (GAD), post-traumatic stress disorder (PTSD), and premenstrual dysphoric disorder (PMDD). Unlabeled indications include: eating disorders, impulse control disorders, vasomotor symptoms o…
		Biperiden	N04AA02	For use as an adjunct in the therapy of all forms of parkinsonism and control of extrapyramidal disorders secondary to neuroleptic drug therapy
		Fluoxetine	N06AB03	Labeled indication include: major depressive disorder (MDD), moderate to severe bulimia nervosa, obsessive-compulsive disorder (OCD), premenstrual dysphoric disorder (PMDD), panic disorder with or without agoraphobia, and combination treatment with olanzapine for treatment-resistant or bipolar I depression. Unlabeled indications include: selective mutism, mild dementia-associated agitation in non…
		Amsacrine	L01XX01	For treatment of acute myeloid leukaemia
		Dicyclomine	A03AA07	For the treatment of functional bowel/irritable bowel syndrome including Colicky abdominal pain; diverticulitis
		Isopropamide	A03AB09	For the treatment of a wide range of gastrointestinal disorders, including such conditions as peptic ulcer, gastritis, hyperchlorhydria, functional diarrhea, irritable or spastic colon, pyloroduodenal irritability, pylorospasm, acute nonspecific gastroenteritis, biliary dyskinesia and chronic cholelithiasis, duodenitis, gastrointestinal spasm; it may also be used to treat genitourinary spasm.
		Zopiclone	N05CF04	For the short-term treatment of insomnia
		Chlorprothixene	N05AF03	For treatment of psychotic disorders (e.g. schizophrenia) and of acute mania occuring as part of bipolar disorders
		Loxapine	N05AH01	For the management of the manifestations of psychotic disorders such as schizophrenia
		Diphenylpyraline	R06AA07,V01AA02,V01AA20	For use in the treatment of allergic rhinitis, hay fever, and allergic skin disorders
		Cyclizine	R06AA07,V01AA02,V01AA20	For prevention and treatment of nausea, vomiting, and dizziness associated with motion sickness, and vertigo (dizziness caused by other medical problems)
8	Dromostanolone	Terazosin	G04CA03	For the treatment of symptomatic BPH and mild to moderate hypertension
		Acitretin	D05BB02	For the treatment of severe psoriasis in adults
		Dapiprazole	S01EX02	Used in the treatment of iatrogenically induced mydriasis produced by adrenergic (phenylephrine) or parasympatholytic (tropicamide) agents used in certain eye examinations
		Alvimopan	A06AH02	Used to accelerate the time to upper and lower gastrointestinal recovery following partial large or small bowel resection surgery with primary anastomosis. Also investigated for use in the treatment of pain (acute or chronic)
		Paricalcitol	A11CC07	For treatment of secondary hyperparathyroidism associated with chronic kidney disease (CKD) Stage 3 and 4
		Vecuronium	M03AC03	Vecuronium is a muscle relaxing agent and is used as an ajunct in general anesthesia
		Cholecalciferol	A11CC05	For the treatment of vitamin D deficiency or insufficiency, refractory rickets (vitamin D resistant rickets), familial hypophosphatemia and hypoparathyroidism, and in the management of hypocalcemia and renal osteodystrophy in patients with chronic renal failure undergoing dialysis. Also used in conjunction with calcium in the management and prevention of primary or corticosteroid-induced osteopor…
		Tazarotene	D05AX05	Used to treat psoriasis, acne and sun damaged skin (photodamage)
		Erlotinib	L01XE03	For the treatment of patients with locally advanced or metastatic non-small cell lung cancer after failure of at least one prior chemotherapy regimen. Also for use, in combination with gemcitabine, as the first-line treatment of patients with locally advanced, unresectable or metastatic pancreatic cancer
		Fenoterol	R03CC04，R03AC04，G02CA03	Fenoterol is used for the treatment of asthma
		Levocabastine	R01AC02，S01GX02	As an ophthalmic for the temporary relief of the signs and symptoms of seasonal allergic conjunctivitis. Also used as a nasal spray for allergic rhinitis.
		Ergocalciferol	A11CC01	For use in the management of hypocalcemia and its clinical manifestations in patients with hypoparathyroidism, as well as for the treatment of familial hypophosphatemia (vitamin D resistant rickets). This drug has also been used in the treatment of nutritional rickets or osteomalacia, vitamin D dependent rickets, rickets or osteomalacia secondary to long-term high dose anticonvulsant therapy, ear…
10	Oxymorphone	Hydrocodone	R05DA03	For relief of moderate to moderately severe pain. Also used for the symptomatic relief of nonproductive cough, alone or in combination with other antitussives or expectorants
		Codeine	N02AA08, R05DA04, R05DA12	For treatment and management of pain (Systemic), also used as an Antidiarrheal and as a cough suppressant
		Morphine	G04BE07，N02AA01，N02AA04，N02AA09，N04BC07，R05DA01，R05DA05，S01XA06，D10AX30	For the relief and treatment of severe pain.
		Dyphylline	R03DA01	For relief of acute bronchial asthma and for reversible bronchospasm associated with chronic bronchitis and emphysema
		Naltrexone	N07BB04	Used as an adjunct to a medically supervised behaviour modification program in the maintenance of opiate cessation in individuals who were formerly physically dependent on opiates and who have successfully undergone detoxification. Also used for the management of alcohol dependence in conjunction with a behavioural modification program
		Hydromorphone	N02AA03	For the relief of moderate to severe pain such as that due to surgery, cancer, trauma/injury, or burns
		Oxycodone	N02AA05	For the treatment of diarrhoea, pulmonary oedema and for the relief of moderate to moderately severe pain
11	Adenine	Quetiapine	N05AH04	For the treatment of schizophrenia and related psychotic disorders.
	Tamibarotene	Droperidol	N01AX01, N05AD08	Droperidol is ssed to produce tranquilization and to reduce the incidence of nausea and vomiting in surgical and diagnostic procedures
	Cortisone acetate	Prilocaine	N01BB04	Used as a local anaesthetic and is often used in dentistry
		Duloxetine	N06AX21	For the acute and maintenance treatment of major depressive disorder (MDD), as well as acute management of generalized anxiety disorder. Also used for the management of neuropathic pain associated with diabetic peripheral neuropathy, and fibromyalgia. Has been used in the management of moderate to severe stress urinary incontinence (SUI) in women
		Glycine	B03AA01，B05CX03	Supplemental glycine may have antispastic activity. Very early findings suggest it may also have antipsychotic activity as well as antioxidant and anti-inflammatory activities
		Conivaptan	C03XA02	For the treatment of euvolemic or hypervolemic hyponatremia (e.g. the syndrome of inappropriate secretion of antidiuretic hormone, or in the setting of hypothyroidism, adrenal insufficiency, pulmonary disorders, etc.) in hospitalized patients
		Methyldopa	C02AB01, C02AB02	For use in the treatment of hypertension
		Ipratropium bromide	R01AX03，R03BB01	For maintenance treatment of bronchospasm associated with chronic obstructive pulmonary disease, including chronic bronchitis and emphysema
		Chlormezanone	M03BB02	Used in the management of anxiety and in the treatment of muscle spasm
		L-Glutamic Acid	A09AB01	Considered to be nature's "Brain food" by improving mental capacities; helps speed the healing of ulcers; gives a "lift" from fatigue; helps control alcoholism, schizophrenia and the craving for sugar
		Perindopril	C09AA04	For the treatment of mild to moderate essential hypertension, mild to moderate congestive heart failure, and to reduce the cardiovascular risk of individuals with hypertension or post-myocardial infarction and stable coronary disease
		Ritodrine	G02CA01	For the treatment and prophylaxis of premature labour
		Trimethoprim	J01EA01	For the treatment of urinary tract infections, uncomplicated pyelonephritis (with sulfamethoxazole) and mild acute prostatitis. May be used as pericoital (with sulfamethoxazole) or continuous prophylaxis in females with recurrent cystitis. May be used as an alternative to treat asymptomatic bacteriuria during pregnancy (only before the last 6 weeks of pregnancy). Other uses include: alternative a…
		Adenosine	C01EB10	Used as an initial treatment for the termination of paroxysmal supraventricular tachycardia (PVST), including that associated with accessory bypass tracts, and is a drug of choice for terminating stable, narrow-complex supraventricular tachycardias (SVT). Also used as an adjunct to thallous chloride TI 201 myocardial perfusion scintigraphy (thallium stress test) in patients who are unable to exer…
		Nelarabine	L01BB07	For the treatment of pediatric and adult patients with acute T-cell lymphoblastic leukemia and T-cell lymphoblastic lymphoma whose disease has not responded to or has relapsed following treatment with at least two chemotherapy regimens
		Methyprylon	N05CE02	For the treatment of insomnia
		Proparacaine	N01BA04	Used as a local (ophthalmic) anesthetic
		Donepezil	N06DA02	For the palliative treatment of mild to moderate dementia of the Alzheimer's type.
		Cinacalcet	H05BX01	For the treatment of secondary hyperparathyroidism in patients with Chronic Kidney Disease who are on hemodialysis or peritoneal dialysis. Also for the treatment of hypercalcemia in patients with parathyroid carcinoma
		Quinapril	C09AA06	For the treatment of hypertension and as adjunct therapy in the treatment of congestive heart failure. May also be used to slow the rate of progression of renal disease in hypertensive individuals with diabetes mellitus and microalbuminuria or overt nephropathy
		Atovaquone	P01AX06	For the treatment or prevention of Pneumocystis carinii pneumonia in patients who are intolerant to trimethoprim-sulfamethoxazole (TMP-SMX). Also indicated for the acute oral treatment of mild to moderate PCP in patients who are intolerant to TMP-SMX
		Baclofen	M03BX01	For the alleviation of signs and symptoms of spasticity resulting from multiple sclerosis, particularly for the relief of flexor spasms and concomitant pain, clonus, and muscular rigidity.
		Danazol	G03XA01	For the treatment of endometriosis and fibrocystic breast disease (in patients unresponsive to simple measures). Also used for the prophylactic treatment of all types of hereditary angioedema in males and females
		Norethindrone	G03AC01	For use as an oral contraceptive in the prevention of pregnancy
		Alclometasone	D07AB10，S01BA10	For the relief of the inflammatory and pruritic manifestations of corticosteroid-responsive dermatoses
		Ciprofloxacin	J01MA02,S03AA07,S02AA15,S01AE03	For the treatment of the following infections caused by susceptible organisms: urinary tract infections, acute uncomplicated cystitis, chronic bacterial prostatitis, lower respiratory tract infections, acute sinusitis, skin and skin structure infections, bone and joint infections, complicated intra-abdominal infections (used in combination with metronidazole), infectious diarrhea, typhoid fever (…
		Fluocinolone Acetonide	C05AA10,D07AC04，S01BA15	For the relief of the inflammatory and pruritic manifestations of corticosteroid-responsive dermatoses. Also for the treatment of chronic non-infectious uveitis affecting the posterior segment of the eye (Retisert)
		Progesterone	G03AC06，G03DA02，G03DA03，G03DA04，L02AB02	For progesterone supplementation or replacement as part of an Assisted Reproductive Technology (ART) treatment for infertile women with progesterone deficiency and for the treatment of secondary amenorrhea. Also used for the reduction of the incidence of endometrial hyperplasia and the attendant risk of endometrial carcinoma in postmenopausal women receiving estrogen replacement therapy, as well …
		Desonide	D07AC09，R03BA02，S01BA11，A07EA06，D07AB08，R01AD05	For the relief of the inflammatory and pruritic manifestations of corticosteroid responsive dermatose
		Ciclesonide	R03BA08	For the treatment of nasal symptoms associated with seasonal and perennial allergic rhinitis in adults and adolescents 12 years of age and older
		Amcinonide	D07AC11	For the relief of the inflammatory and pruritic manifestations of corticosteroid-responsive dermatoses
		Spironolactone	C03DA01	Used primarily to treat low-renin hypertension, hypokalemia, and Conn's syndrome
		Flutamide	L02BB01	For the management of locally confined Stage B2-C and Stage D2 metastatic carcinoma of the prostate
12	Estropipate	Finasteride	D11AX10，G04CB01	For the treatment of symptomatic benign prostatic hyperplasia (BPH) in men with an enlarged prostate to: Improve symptoms, reduce the risk of acute urinary retention, reduce the risk of the need for surgery including transurethral resection of the prostate. Also used for the stimulation of regrowth of hair in men with mild to moderate androgenetic alopecia (male pattern alopecia, hereditary alope…
	Drospirenone	Norgestimate	G03AA11	For the prevention of pregnancy
		Conjugated Estrogens	G03CA57	For the treatment of moderate to severe vasomotor symptoms associated with the menopause, atrophic vaginitis, osteoporosis, hypoestrogenism due to hypogonadism, castration, primary ovarian failure, breast cancer (for palliation only), and Advanced androgen-dependent carcinoma of the prostate (for palliation only)
		Levonorgestrel	G03AC03, G03AD01	For the treatment of menopausal and postmenopausal disorders and alone or in combination with other hormones as an oral contraceptive
		Testosterone Propionate	G03BA03	To be used as hormone replacement or substitution of diminished or absent endogenous testosterone. Use in males: For management of congenital or acquired hypogonadism, hypogonadism associated with HIV infection, and male climacteric (andopause). Use in females: For palliative treatment of androgen-responsive, advanced, inoperable, metastatis (skeletal) carcinoma of the breast in women who are 1-5…
		Difluprednate	D07AC19	For the treatment of inflammation and pain associated with ocular surgery
13	L-Isoleucine	Zolmitriptan	N02CC03	For the acute treatment of adult migraine with or without auras
	Methacholine	Fluorouracil	L01BC02	For the topical treatment of multiple actinic or solar keratoses. In the 5% strength it is also useful in the treatment of superficial basal cell carcinomas when conventional methods are impractical, such as with multiple lesions or difficult treatment sites. Fluorouracil injection is indicated in the palliative management of some types of cancer, including colon, esophageal, gastric, rectum, bre…
	L-Leucine	Aminolevulinic acid	L01XD04	Aminolevulinic acid plus blue light illumination using a blue light photodynamic therapy illuminator is indicated for the treatment of minimally to moderately thick actinic keratoses of the face or scalp
	Aspartame	L-Ornithine	A05BA06，D11AX16，P01CX03	Used for nutritional supplementation, also for treating dietary shortage or imbalance. It has been claimed that ornithine improves athletic performance, has anabolic effects, has wound-healing effects, and is immuno-enhancing
	Cycrimine	Raloxifene	G03XC01	For the prevention and treatment of osteoporosis in post-menopausal women, as well as prevention and treatment of corticosteroid-induced bone loss. Also for the reduction in the incidence of invasive breast cancer in postmenopausal women with osteoporosis or have a high risk for developing breast cancer
		Methimazole	H03BB02	For the treatment of hyperthyroidism, goiter, Graves disease and psoriasis
		Chlorpromazine	N05AA01	For the treatment of schizophrenia, control nausea and vomiting, For relief of restlessness and apprehension before surgery, adjunct in the treatment of tetanus, control the manifestations of the manic type of manic-depressive illness
		Labetalol	C07AG01	For the management of hypertension (alone or in combination with other classes of antihypertensive agents), as well as chronic stable angina pectoris and sympathetic overactivity syndrome associated with severe tetanus. Labetalol is used parenterally for immediate reduction in blood pressure in severe hypertension or in hypertensive crises when considered an emergency, for the control of blood pr…
		Trifluoperazine	N05AB06	For the treatment of anxiety disorders, depressive symptoms secondary to anxiety and agitation
		Tolterodine	G04BD07	For the treatment of overactive bladder (with symptoms of urinary frequency, urgency, or urge incontinence)
		Clopidogrel	B01AC04	For the reduction of atherosclerotic events (myocardial infarction, stroke, and vascular death) in patients with atherosclerosis documented by recent stroke, recent myocardial infarction, or established peripheral arterial disease
		Sulfinpyrazone	M04AB02	For the treatment of gout and gouty arthritis
		Pirenzepine	A02BX03	For the treatment of peptic ulcer, gastric ulcer, and duodenal ulcer
		Acetohydroxamic Acid	G04BX03	Used, in addition to antibiotics or medical procedures, to treat chronic urea-splitting urinary infections
		Letrozole	L02BG04	For the extended adjuvant treatment of early breast cancer in postmenopausal women who have received 5 years of adjuvant tamoxifen therapy. Also for first-line treatment of postmenopausal women with hormone receptor positive or hormone receptor unknown locally advanced or metastatic breast cancer. Also indicated for the treatment of advanced breast cancer in postmenopausal women with disease prog…
		Flucytosine	D01AE21，J02AX01	For the treatment (in combination with amphotericin B) of serious infections caused by susceptible strains of Candida (septicemia, endocarditis and urinary system infections) and/or Cryptococcus (meningitis and pulmonary infections)
		Bambuterol	R03CC12	For the prevention and reversal of bronchospasm in patients 12 years of age and older with asthma and reversible bronchospasm associated with bronchitis and emphysema
		Miconazole	A01AB09, A07AC01，D01AC02,G01AF04,J02AB01,S02AA13	For topical application in the treatment of tinea pedis (athlete’s foot), tinea cruris, and tinea corporis caused by Trichophyton rubrum, Trichophyton mentagrophytes, and Epidermophyton floccosum, in the treatment of cutaneous candidiasis (moniliasis), and in the treatment of tinea versicolor
		Mesalazine	A07EC02	For the treatment of active ulcerative proctitis
		Glycodiazine	A10BC01	Glycodiazine is used concomitantly with insulin for the treatment of noninsulin-dependent (type 2) diabetes mellitus
		Escitalopram	N06AB10	Labeled indications include major depressive disorder (MDD) and generalized anxiety disorder (GAD). Unlabeled indications include treatment of mild dementia-associated agitation in nonpsychotic patients.
		Citalopram	N06AB10	For the treatment of depression. Unlabeled indications include: treatment of mild dementia-associated agitation in nonpsychotic patients, smoking cessation, ethanol abuse, obsessive-compulsive disorder (OCD) in children, and diabetic neuropathy
		Epinastine	R06AX24，S01GX10	For the prevention of itching associated with allergic conjunctivitis
		Glucosamine	M01AX05	For the treatment and prevention of osteoarthritis, by itself or in combination with chondroitin sulfate
		Ondansetron	A04AA01	For the prevention of nausea and vomiting associated with emetogenic cancer chemotherapy, postoperation, and radiation. Also used for the treatment of postoperative nausea and vomiting
		Metformin	A10BA02	For use as an adjunct to diet and exercise in adult patients (18 years and older) with NIDDM. May also be used for the management of metabolic and reproductive abnormalities associated with polycystic ovary syndrome (PCOS)
		Tadalafil	G04BE08	Used for the treatment of erectile dysfunction
		Chlorpheniramine	R06AB02，R06AB04	For the treatment of rhinitis, urticaria, allergy, common cold, asthma and hay fever
		Oxyphencyclimine	A03AA01	For the treatment of peptic ulcer disease and the relief of smooth muscle spasms in gastrointestinal disorders
		Desflurane	N01AB07	For use as an inhalation agent for induction and/or maintenance of anesthesia for inpatient and outpatient surgery in adults
		Desipramine	N06AA01	For relief of symptoms in various depressive syndromes, especially endogenous depression. It has also been used to manage chronic peripheral neuropathic pain, as a second line agent for the management of anxiety disorders (e.g. panic disorder, generalized anxiety disorder), and as a second or third line agent in the ADHD management
15	L-Histidine	Benzocaine	C05AD03，D04AB04，N01BA05，R02AD01，A01AD11	For general use as a lubricant and topical anesthetic on esophagus, larynx, mouth, nasal cavity, rectum, respiratory tract or trachea, urinary tract, vagina. It is also used to suppress gag reflex
	L-Phenylalanine	Propylthiouracil	H03BA02	Used to manage hyperthyroidism which is due to an overactive thyroid gland (Grave's disease)
	L-Tyrosine	Amphetamine	N06BA01, N06BA02	For treatment of Attention Deficit Disorder with Hyperactivity (ADDH) and narcolepsy in children
		Pseudoephedrine	R01BA02	For the treatment of nasal congestion, sinus congestion, Eustachian tube congestion, and vasomotor rhinitis, and as an adjunct to other agents in the optimum treatment of allergic rhinitis, croup, sinusitis, otitis media, and tracheobronchitis. Also used as first-line therapy of priapism
		Isometheptene	A03AX10	Isometheptene is a sympathomimetic drug which causes vasoconstriction. It is used for treating migraines and tension headaches.
		Isosorbide Mononitrate	C01DA14	For the prevention of angina pectoris due to coronary artery disease and the treatment of acute and chronic angina pectoris, hypertension, and myocardial infarction
		Methamphetamine	N06BA03	For the treatment of Attention Deficit Disorder with Hyperactivity (ADHD) and exogenous obesity
		Pamidronate	M05BA03	For the treatment of moderate or severe hypercalcemia associated with malignancy
16	Phendimetrazine	Phenindione	B01AA02	For the treatment of pulmonary embolism, cardiomyopathy, atrial fibrillation and flutter, cerebral embolism, mural thrombosis, and thrombophili. Also used for anticoagulant prophylaxis
	Fospropofol	Dinoprostone	G02AD02	For the termination of pregnancy during the second trimester (from the 12th through the 20th gestational week as calculated from the first day of the last normal menstrual period), as well as for evacuation of the uterine contents in the management of missed abortion or intrauterine fetal death up to 28 weeks of gestational age as calculated from the first day of the last normal menstrual period.…
		Mazindol	A08AA05	Used in short-term (a few weeks) treatment of exogenous obesity in conjunction with a regimen of weight reduction based on caloric restriction, exercise, and behavior modification in patients with a body mass index of 30 kg of body weight per height in meters squared (kg/m2) or in patients with a body mass index of 27 kg/m2 in the presence of risk factors such as hypertension, diabetes, or hyperl…
		Venlafaxine	N06AX16, N06AX23	For the management of major depressive disorder (MDD), generalized anxiety disorder (GAD), social anxiety disorder (social phobia), panic disorder with or without agoraphobia, and vasomotor symptoms in women with breast cancer and in postmenopausal women
		Quinine	M09AA01，P01BC01	For the treatment of malaria and leg cramps
		Desvenlafaxine	N06AX23	Desvenlafaxine is indicated for the treatment of major depressive disorder in adults
		Mexiletine	C01BB02	For the treatment of ventricular tachycardia and symptomatic premature ventricular beats, and prevention of ventricular fibrillation
		Mitotane	L01XX23	For treatment of inoperable adrenocortical tumours; Cushing's syndrome
		Tolazoline	C04AB02,M02AX02	For the treatment of pulmonary artery anomalies
		Methylphenidate	N06BA04	For use as an integral part of a total treatment program which typically includes other remedial measures (psychological, educational, social) for a stabilizing effect in children with a behavioral syndrome characterized by the following group of developmentally inappropriate symptoms: moderate-to-severe distractibility, short attention span, hyperactivity, emotional lability, and impulsivity
18	L-Cystine	Etoposide	L01CB01	For use in combination with other chemotherapeutic agents in the treatment of refractory testicular tumors and as first line treatment in patients with small cell lung cancer. Also used to treat other malignancies such as lymphoma, non-lymphocytic leukemia, and glioblastoma multiforme
	Quinacrine	Zuclopenthixol	N05AF05	For the management of the manifestations of schizophrenia
		Methotrimeprazine	N05AA02	For the treatment of psychosis, particular those of schizophrenia, and manic phases of bipolar disorder
20	Enprofylline	Aminophylline	R03DA05	For the treatment of bronchospasm due to asthma, emphysema and chronic bronchitis
		Theophylline	R03DA04	For the treatment of the symptoms and reversible airflow obstruction associated with chronic asthma and other chronic lung diseases, such as emphysema and chronic bronchitis
		Pyridoxal	A11HA06，C10AX07	For nutritional supplementation and for treating dietary shortage or imbalance
21	Spermine	Imiquimod	D06BB10	For the topical treatment of clinically typical, nonhyperkeratotic, nonhypertrophic actinic keratoses on the face or scalp in immunocompetent adults. Also indicated for the treatment of external genital and perianal warts/condyloma acuminata in individuals 12 years old and above
		Thiethylperazine	R06AD03	For the treatment or relief of nausea and vomiting
		Fesoterodine	G04BD11	For the treatment of overactive bladder (with symptoms of urinary frequency, urgency, or urge incontinence)
		Epoprostenol	B01AC09	For the long-term intravenous treatment of primary pulmonary hypertension and pulmonary hypertension associated with the scleroderma spectrum of disease in NYHA Class III and Class IV patients who do not respond adequately to conventional therapy
		Remifentanil	N01AH06	For use during the induction and maintenance of general anesthesia
		Amiodarone	C01BD01	Intravenously, for initiation of treatment and prophylaxis of frequently recurring ventricular fibrillation and hemodynamically unstable ventricular tachycardia in patients refractory to other therapy. Orally, for the treatment of life-threatening recurrent ventricular arrhythmias such as recurrent ventricular fibrillation and recurrent hemodynamically unstable ventricular tachycardia
		Clomifene	G03GB02	Used mainly in female infertility due to anovulation (e.g. due to polycystic ovary syndrome) to induce ovulation
23	Floxuridine	Ribavirin	J05AB04	For the treatment of chronic hepatitis C and for respiratory syncytial virus (RSV)
	Azacitidine	Cytarabine	L01BC01	For the treatment of acute non-lymphocytic leukemia, acute lymphocytic leukemia and blast phase of chronic myelocytic leukemia
25	Carphenazine	Fluphenazine	N05AB02	For management of manifestations of psychotic disorders
		Thiothixene	N05AF04	For the management of schizophrenia
		Buclizine	R06AE01	For prevention and treatment of nausea, vomiting, and dizziness associated with motion sickness and vertigo (dizziness caused by other medical problems)
		Astemizole	R06AX11	Astemizole was indicated for use in the relieving allergy symptoms, particularly rhinitis and conjunctivitis. It has been withdrawn from the market however due to concerns of arrhythmias
		Mesoridazine	N05AC03	Used in the treatment of schizophrenia, organic brain disorders, alcoholism and psychoneuroses
26	Quinestrol	Lubiprostone	A06AX03	For the treatment of chronic idiopathic constipation in the adult population. Also used for the treatment of irritable bowel syndrome with constipation in women who are 18 years of age or older
		Methysergide	N02CA04	For the treatment of vascular headache
		Acebutolol	C07AB04	For the management of hypertension and ventricular premature beats in adults
36	Ethynodiol Diacetate	Polythiazide	C03AA05	Polythiazide is a thiazide diuretic used to decrease edema and decrease blood pressure
		Clocortolone	D07AB21	For short-term topical treatment of the inflammatory and pruritic manifestations of moderate to severe corticosteroid-responsive dermatoses of the scalp
42	Mimosine	Levetiracetam	N03AX14	Used as adjunctive therapy in the treatment of partial onset seizures in adults and children 4 years of age and older with epilepsy.
		Phenylephrine	C01CA06，R01AA04，R01AB01，R01BA03，S01FB01，S01GA05，C05AX03	Phenylephrine is mainly used to treat nasal congestion, but may also be useful in treating hypotension and shock, hypotension during spinal anaesthesia, prolongation of spinal anaesthesia, paroxysmal supraventricular tachycardia, symptomatic relief of external or internal hemorrhoids, and to increase blood pressure as an aid in the diagnosis of heart murmurs.
