# Supplementary material for: Drug repositioning by applying ‘expression profiles’ generated by integrating chemical structure similarity and gene semantic similarity
Source: Royal Society of Chemistry journal article supplement (doi:10.1039/c3mb70554d), 2014-02-13
Supplement: c3mb70554d8.xlsx [file c3mb70554d8.xlsx]

## Sheet: Sheet1
		The details of drugs' indications within clusetr 10.
Drug without ATC code	Drugs with ATC codes	ATC codes	Drug known indications	Predicted indications
Oxymorphone	Oxycodone	N	For the treatment of diarrhoea, pulmonary oedema and for the relief of moderate to moderately severe pain	as an possible opiate maybe play a role in analgesia such as chronic pain and respiratory depression
	Hydromorphone	N	For the relief of moderate to severe pain such as that due to surgery, cancer, trauma/injury, or burns
	Naltrexone	N	Used as an adjunct to a medically supervised behaviour modification program in the maintenance of opiate cessation in individuals who were formerly physically dependent on opiates and who have successfully undergone detoxification. Also used for the management of alcohol dependence in conjunction with a behavioural modification program	Oxymorphone would be used in the relief of kinds of moderate to severe pain caused by most of diseases such as chronic osteoarthritis,cancer and so on
	Codeine	N,R	For treatment and management of pain (Systemic), also used as an Antidiarrheal and as a cough suppressant
	Morphine	G,N,R,S,D	For the relief and treatment of severe pain.	Oxymorphone could be used as a cough suppressant like Codeine and Hydrocodone for its anaesthetic effect
	Dyphylline	R	For relief of acute bronchial asthma and for reversible bronchospasm associated with chronic bronchitis and emphysema
	Hydrocodone	R	For relief of moderate to moderately severe pain. Also used for the symptomatic relief of nonproductive cough, alone or in combination with other antitussives or expectorants
