# Supplementary material for: Drug repositioning by applying ‘expression profiles’ generated by integrating chemical structure similarity and gene semantic similarity
Source: Royal Society of Chemistry journal article supplement (doi:10.1039/c3mb70554d), 2014-02-13
Supplement: c3mb70554d9.xlsx [file c3mb70554d9.xlsx]

## Sheet: A
The signatures (Probe IDs) with 300 length about 28 drugs.
Gabapentin	Flunarizine	Amoxapine	Metixene	Ergocalciferol	Paroxetine	Naltrexone	Methyldopa	Levonorgestrel	Metformin	Bethanechol	Benzocaine	Felodipine	Zuclopenthixol	Nortriptyline	Aminophylline	Clomifene	Aminocaproic Acid	Fluphenazine	Haloperidol	Bupropion	Disopyramide	Captopril	Bromocriptine	Imipramine	Prednisolone	Ketoprofen	Prochlorperazine
200935_at	201481_s_at	200756_x_at	200756_x_at	179_at	201355_s_at	200595_s_at	200836_s_at	201195_s_at	1598_g_at	1494_f_at	200793_s_at	200808_s_at	200643_at	200755_s_at	200857_s_at	200742_s_at	201557_at	200672_x_at	200053_at	200824_at	200688_at	200861_at	200677_at	1316_at	200878_at	160020_at	200831_s_at
201187_s_at	201715_s_at	201055_s_at	200831_s_at	200070_at	201374_x_at	200603_at	201329_s_at	201269_s_at	179_at	200928_s_at	200795_at	201397_at	200831_s_at	201243_s_at	201355_s_at	201243_s_at	202030_at	200701_at	200598_s_at	201124_at	200835_s_at	201513_at	200748_s_at	200598_s_at	201110_s_at	200672_x_at	200864_s_at
201213_at	201763_s_at	201230_s_at	201169_s_at	200628_s_at	201627_s_at	200605_s_at	202208_s_at	201638_s_at	200759_x_at	201055_s_at	200935_at	201464_x_at	200935_at	201557_at	201766_at	201332_s_at	202103_at	201048_x_at	200604_s_at	201314_at	201059_at	201894_s_at	200885_at	201096_s_at	201367_s_at	201269_s_at	200897_s_at
201354_s_at	201806_s_at	201909_at	201404_x_at	200789_at	203170_at	200639_s_at	203129_s_at	201865_x_at	201087_at	201369_s_at	200974_at	201531_at	201167_x_at	201625_s_at	201818_at	201556_s_at	202205_at	201127_s_at	200628_s_at	201622_at	201155_s_at	202175_at	201057_s_at	201116_s_at	201481_s_at	201638_s_at	201133_s_at
201837_s_at	202008_s_at	202248_at	201473_at	200959_at	203398_s_at	200706_s_at	203285_s_at	201925_s_at	201158_at	201655_s_at	201168_x_at	201794_s_at	201275_at	201626_at	201879_at	201625_s_at	202476_s_at	201205_at	200724_at	201802_at	201206_s_at	202254_at	201468_s_at	201324_at	201510_at	201856_s_at	201329_s_at
201979_s_at	202064_s_at	202492_at	201627_s_at	201003_x_at	203416_at	200762_at	203307_at	202499_s_at	201389_at	201741_x_at	201294_s_at	202046_s_at	201283_s_at	201627_s_at	202339_at	202045_s_at	203407_at	201247_at	200779_at	201984_s_at	201329_s_at	202400_s_at	201531_at	201483_s_at	201747_s_at	201998_at	201464_x_at
202044_at	202220_at	202531_at	202073_at	201106_at	203626_s_at	200833_s_at	203495_at	202831_at	201776_s_at	201868_s_at	201401_s_at	202236_s_at	201329_s_at	201791_s_at	202452_at	202181_at	203464_s_at	201625_s_at	200831_s_at	202082_s_at	201369_s_at	202422_s_at	201590_x_at	201567_s_at	201777_s_at	202040_s_at	201540_at
202072_at	202342_s_at	202719_s_at	202335_s_at	201120_s_at	203887_s_at	200970_s_at	203932_at	202851_at	201790_s_at	201915_at	201755_at	202455_at	201465_s_at	201958_s_at	202994_s_at	202260_s_at	203638_s_at	202067_s_at	200905_x_at	202273_at	201715_s_at	202517_at	201785_at	201832_s_at	201850_at	202473_x_at	201560_at
202482_x_at	202627_s_at	203309_s_at	202539_s_at	201222_s_at	203949_at	201330_at	203937_s_at	202887_s_at	201819_at	202254_at	201797_s_at	202482_x_at	201474_s_at	202245_at	203419_at	202902_s_at	203866_at	202068_s_at	200924_s_at	202307_s_at	201731_s_at	202620_s_at	202439_s_at	201965_s_at	201869_s_at	202730_s_at	201625_s_at
202764_at	202716_at	203348_s_at	202662_s_at	201319_at	204077_x_at	201407_s_at	203965_at	203191_at	201932_at	202692_s_at	202145_at	202510_s_at	201506_at	202314_at	203666_at	203056_s_at	203952_at	202083_s_at	201048_x_at	202448_s_at	201783_s_at	202674_s_at	202686_s_at	202341_s_at	201903_at	202938_x_at	201780_s_at
202817_s_at	203106_s_at	204249_s_at	202928_s_at	201483_s_at	204265_s_at	201560_at	204182_s_at	203233_at	201961_s_at	203061_s_at	202210_x_at	202583_s_at	201626_at	202375_at	203891_s_at	203139_at	204129_at	202211_at	201275_at	202504_at	201902_s_at	202700_s_at	202769_at	202588_at	202208_s_at	203051_at	201790_s_at
202893_at	203127_s_at	204294_at	203389_at	201507_at	204416_x_at	201816_s_at	204281_at	204063_s_at	202045_s_at	203072_at	202247_s_at	202665_s_at	201791_s_at	202459_s_at	203958_s_at	203153_at	204195_s_at	202553_s_at	201364_s_at	202510_s_at	202072_at	202903_at	202795_x_at	202672_s_at	202263_at	203220_s_at	202129_s_at
202896_s_at	203368_at	204326_x_at	203676_at	202252_at	204621_s_at	201829_at	204415_at	204298_s_at	202049_s_at	203171_s_at	202249_s_at	202672_s_at	202074_s_at	202539_s_at	204060_s_at	203308_x_at	204691_x_at	202562_s_at	201365_at	202834_at	202123_s_at	202959_at	203050_at	202710_at	202366_at	203264_s_at	202195_s_at
202914_s_at	203373_at	204334_at	203731_s_at	202556_s_at	204626_s_at	201845_s_at	204693_at	204416_x_at	202104_s_at	203206_at	202426_s_at	202887_s_at	202150_s_at	202644_s_at	204144_s_at	203389_at	205014_at	202731_at	201399_s_at	203198_at	202187_s_at	203078_at	203097_s_at	202721_s_at	202367_at	203443_at	202211_at
203029_s_at	203419_at	204358_s_at	203811_s_at	202585_s_at	204660_at	201925_s_at	204856_at	204595_s_at	202226_s_at	203223_at	202519_at	202928_s_at	202245_at	202769_at	204337_at	203827_at	205059_s_at	202842_s_at	201471_s_at	203592_s_at	202208_s_at	203381_s_at	203140_at	202722_s_at	202417_at	203756_at	202334_s_at
203128_at	203451_at	204377_s_at	204272_at	202660_at	204815_s_at	201971_s_at	204991_s_at	204644_at	202368_s_at	203711_s_at	202769_at	203199_s_at	202310_s_at	202869_at	204637_at	203911_at	205073_at	203010_at	201476_s_at	203604_at	202328_s_at	203516_at	203252_at	202962_at	202580_x_at	203904_x_at	202375_at
203464_s_at	203657_s_at	204575_s_at	204334_at	202782_s_at	204960_at	201972_at	205002_at	204698_at	202369_s_at	203933_at	202771_at	203231_s_at	202342_s_at	202914_s_at	204696_s_at	203981_s_at	205121_at	203158_s_at	201626_at	203618_at	202624_s_at	203521_s_at	203278_s_at	203130_s_at	202588_at	204325_s_at	202459_s_at
203540_at	203737_s_at	204685_s_at	204426_at	202841_x_at	205305_at	202160_at	205088_at	204923_at	202407_s_at	204038_s_at	202801_at	203234_at	202344_at	203027_s_at	204777_s_at	204271_s_at	205141_at	203265_s_at	201637_s_at	204169_at	202860_at	203604_at	203335_at	203288_at	202590_s_at	204483_at	202539_s_at
203665_at	203768_s_at	204704_s_at	204532_x_at	202873_at	205438_at	202207_at	205333_s_at	205049_s_at	202835_at	204169_at	203047_at	203248_at	202455_at	203234_at	204785_x_at	204568_at	205182_s_at	203665_at	201791_s_at	204303_s_at	202894_at	203654_s_at	203430_at	203402_at	202668_at	204535_s_at	202540_s_at
203731_s_at	203977_at	204745_x_at	204569_at	202948_at	205508_at	202303_x_at	205424_at	205296_at	202991_at	204183_s_at	203118_at	203349_s_at	202540_s_at	203390_s_at	204864_s_at	204615_x_at	205271_s_at	203752_s_at	201871_s_at	204346_s_at	203386_at	203763_at	203450_at	203706_s_at	202795_x_at	204536_s_at	202558_s_at
204352_at	204099_at	204777_s_at	204657_s_at	203124_s_at	205685_at	202388_at	205434_s_at	205392_s_at	203055_s_at	204269_at	203183_s_at	203665_at	202718_at	203809_s_at	204893_s_at	204757_s_at	205279_s_at	204096_s_at	201940_at	204415_at	203479_s_at	203864_s_at	203640_at	203725_at	202991_at	205018_s_at	202565_s_at
204509_at	204123_at	204987_at	204866_at	203771_s_at	205791_x_at	202502_at	205448_s_at	205838_at	203127_s_at	204308_s_at	203402_at	203844_at	202734_at	203823_at	205100_at	205072_s_at	205333_s_at	204423_at	202067_s_at	204494_s_at	203718_at	203898_at	203695_s_at	203768_s_at	202993_at	205481_at	202721_s_at
204525_at	204253_s_at	205049_s_at	205018_s_at	203805_s_at	205829_at	202506_at	205471_s_at	205870_at	203149_at	204355_at	203419_at	204230_s_at	202842_s_at	203827_at	205188_s_at	205076_s_at	205432_at	204637_at	202068_s_at	204535_s_at	203737_s_at	204061_at	203853_s_at	203827_at	203140_at	205606_at	202722_s_at
204632_at	204285_s_at	205096_at	205141_at	204014_at	205908_s_at	202607_at	205737_at	206012_at	203205_at	204528_s_at	203668_at	204286_s_at	202928_s_at	203958_s_at	205211_s_at	205159_at	205780_at	204888_s_at	202083_s_at	204878_s_at	203836_s_at	204168_at	204090_at	203846_at	203268_s_at	205679_x_at	202731_at
204660_at	204294_at	205146_x_at	205239_at	204017_at	205953_at	202680_at	205784_x_at	206056_x_at	203210_s_at	204667_at	204081_at	204326_x_at	203058_s_at	203981_s_at	205440_s_at	205203_at	205931_s_at	204901_at	202316_x_at	205021_s_at	203943_at	204213_at	204159_at	204180_s_at	203379_at	205877_s_at	202733_at
205085_at	204337_at	205230_at	205396_at	204069_at	205967_at	202687_s_at	205976_at	206310_at	203226_s_at	204701_s_at	204360_s_at	204436_at	203128_at	204144_s_at	205586_x_at	205212_s_at	205950_s_at	204968_at	202501_at	205109_s_at	204016_at	204836_at	204198_s_at	204200_s_at	203437_at	206123_at	202770_s_at
205144_at	204501_at	205392_s_at	205617_at	204173_at	206171_at	202872_at	206004_at	206498_at	203273_s_at	204920_at	204382_at	204747_at	203220_s_at	204231_s_at	205700_at	205479_s_at	206239_s_at	205090_s_at	202539_s_at	205209_at	204077_x_at	205011_at	204351_at	204224_s_at	203542_s_at	206132_at	202890_at
205157_s_at	204577_s_at	205409_at	205822_s_at	204328_at	206183_s_at	202932_at	206117_at	206627_s_at	203528_at	204927_at	204383_at	204864_s_at	203313_s_at	204418_x_at	205742_at	205542_at	206495_s_at	205365_at	202821_s_at	205424_at	204155_s_at	205295_at	204417_at	204307_at	203638_s_at	206212_at	202971_s_at
205343_at	204590_x_at	205490_x_at	205920_at	204383_at	206463_s_at	203213_at	206160_at	206666_at	203701_s_at	204981_at	204494_s_at	205017_s_at	203330_s_at	204741_at	205873_at	205568_at	206538_at	205396_at	202842_s_at	205438_at	204169_at	205718_at	204601_at	204316_at	203776_at	206350_at	203101_s_at
205409_at	204747_at	205765_at	206411_s_at	204786_s_at	206477_s_at	203227_s_at	206275_s_at	206750_at	203959_s_at	205092_x_at	204512_at	205047_s_at	203526_s_at	204908_s_at	205986_at	205660_at	206669_at	205502_at	202887_s_at	205657_at	204316_at	205852_at	204645_at	204396_s_at	203867_s_at	206612_at	203165_s_at
205561_at	205218_at	206072_at	206412_at	204795_at	206539_s_at	203487_s_at	206336_at	206962_x_at	204011_at	205193_at	204790_at	205306_x_at	203640_at	205031_at	205990_s_at	205685_at	206679_at	205725_at	203100_s_at	205793_x_at	204384_at	206021_at	204701_s_at	204512_at	204231_s_at	206706_at	203208_s_at
205710_at	205248_at	206133_at	206745_at	204824_at	206594_at	203562_at	206339_at	207167_at	204147_s_at	205199_at	204799_at	205595_at	203853_s_at	205205_at	206132_at	205874_at	206708_at	205818_at	203207_s_at	205975_s_at	204505_s_at	206164_at	204745_x_at	204597_x_at	204247_s_at	206827_s_at	203227_s_at
205749_at	205280_at	206274_s_at	206907_at	205095_s_at	206612_at	203598_s_at	206512_at	207206_s_at	204209_at	205204_at	204994_at	205660_at	203950_s_at	205360_at	206182_at	206085_s_at	206783_at	205981_s_at	203217_s_at	205996_s_at	204757_s_at	206530_at	205494_at	204738_s_at	204251_s_at	206904_at	203232_s_at
206100_at	205330_at	206347_at	207001_x_at	205204_at	206666_at	203614_at	206593_s_at	207254_at	204308_s_at	205266_at	205022_s_at	205707_at	204015_s_at	205398_s_at	206361_at	206353_at	207065_at	206015_s_at	203262_s_at	206035_at	204837_at	206532_at	205639_at	204770_at	204308_s_at	206911_at	203279_at
206108_s_at	205435_s_at	206764_x_at	207061_at	205447_s_at	206670_s_at	203719_at	206665_s_at	207393_at	204325_s_at	205360_at	205119_s_at	205715_at	204217_s_at	205411_at	206397_x_at	206573_at	207158_at	206115_at	203271_s_at	206235_at	204840_s_at	206671_at	205809_s_at	204793_at	204346_s_at	207093_s_at	203479_s_at
206344_at	205569_at	206766_at	207115_x_at	205660_at	206780_at	203821_at	206718_at	207929_at	204441_s_at	205442_at	205271_s_at	205746_s_at	204413_at	205437_at	206521_s_at	206729_at	207263_x_at	206180_x_at	203364_s_at	206315_at	204866_at	206783_at	205988_at	205018_s_at	204504_s_at	207117_at	203725_at
206893_at	205575_at	206827_s_at	207130_at	205775_at	206862_at	203855_at	206956_at	208302_at	204691_x_at	205510_s_at	205446_s_at	205977_s_at	204420_at	205575_at	206607_at	207078_at	207408_at	206714_at	203437_at	206487_at	204909_at	206791_s_at	206342_x_at	205035_at	204560_at	207369_at	203827_at
207056_s_at	205585_at	206836_at	207283_at	205973_at	206943_at	203957_at	207008_at	208358_s_at	204989_s_at	205716_at	205661_s_at	206197_at	204564_at	205652_s_at	206615_s_at	207117_at	207665_at	206868_at	203598_s_at	206607_at	205079_s_at	207166_at	206461_x_at	205193_at	204678_s_at	207435_s_at	203855_at
207152_at	205662_at	207131_x_at	207439_s_at	206002_at	207189_s_at	204186_s_at	207038_at	208395_s_at	205070_at	205784_x_at	205907_s_at	206470_at	204615_x_at	205727_at	206697_s_at	207387_s_at	207712_at	207275_s_at	203640_at	206671_at	205197_s_at	207218_at	206661_at	205266_at	204856_at	207548_at	203911_at
207187_at	205777_at	207143_at	207549_x_at	206060_s_at	207270_x_at	204194_at	207241_at	208529_at	205076_s_at	205994_at	206036_s_at	206513_at	204637_at	205745_x_at	206747_at	207659_s_at	207919_at	207549_x_at	203771_s_at	206679_at	205210_at	207400_at	206781_at	205354_at	204991_s_at	207658_s_at	203950_s_at
207270_x_at	205817_at	207147_at	207782_s_at	206286_s_at	207491_at	204461_x_at	207564_x_at	208581_x_at	205198_s_at	206033_s_at	206529_x_at	206547_s_at	204667_at	205822_s_at	207082_at	207699_at	207976_at	207782_s_at	203964_at	206738_at	205411_at	207545_s_at	207100_s_at	205375_at	205160_at	207666_x_at	204334_at
207299_s_at	205856_at	207176_s_at	208055_s_at	206507_at	207712_at	204553_x_at	207617_at	208790_s_at	205614_x_at	206053_at	206833_s_at	206659_at	204717_s_at	205847_at	207175_at	208023_at	208104_s_at	207851_s_at	204129_at	207265_s_at	206076_at	207568_at	207184_at	205662_at	205251_at	207747_s_at	204568_at
207412_x_at	206027_at	207202_s_at	208188_at	206669_at	207798_s_at	204618_s_at	207680_x_at	209237_s_at	205676_at	206235_at	207084_at	206684_s_at	204925_at	205867_at	207263_x_at	208786_s_at	208182_x_at	208138_at	204216_s_at	207520_at	206276_at	207684_at	207462_at	205681_at	205293_x_at	207865_s_at	204615_x_at
207960_at	206048_at	207222_at	208280_at	206686_at	208015_at	204641_at	207694_at	209335_at	205707_at	206378_at	207239_s_at	206706_at	205002_at	206033_s_at	207269_at	209034_at	208278_s_at	208205_at	204344_s_at	207737_at	206467_x_at	207692_s_at	207861_at	205822_s_at	205598_at	207955_at	204918_s_at
208009_s_at	206190_at	207692_s_at	208297_s_at	206864_s_at	208031_s_at	205105_at	207735_at	209383_at	205797_s_at	206808_at	207291_at	206740_x_at	205017_s_at	206103_at	207315_at	209146_at	208280_at	208247_at	204426_at	208274_at	206723_s_at	207734_at	207873_x_at	206002_at	206106_at	207969_x_at	205032_at
208141_s_at	206521_s_at	207890_s_at	208325_s_at	206942_s_at	208128_x_at	205355_at	207800_at	209765_at	205873_at	206951_at	207365_x_at	207043_s_at	205018_s_at	206594_at	207400_at	209189_at	208519_x_at	208390_s_at	204448_s_at	208297_s_at	206838_at	207737_at	207890_s_at	206441_s_at	206744_s_at	207995_s_at	205060_at
208187_s_at	206543_at	207957_s_at	208385_at	207122_x_at	208301_at	205667_at	207866_at	209800_at	206103_at	207045_at	208149_x_at	207117_at	205032_at	206706_at	207445_s_at	209230_s_at	209427_at	208622_s_at	204555_s_at	208914_at	207247_s_at	207859_s_at	208439_s_at	206907_at	206961_s_at	207998_s_at	205479_s_at
208360_s_at	206673_at	207980_s_at	208568_at	207455_at	208347_at	205746_s_at	207917_at	209866_s_at	206147_x_at	207163_s_at	208536_s_at	207190_at	205050_s_at	206966_s_at	207452_s_at	209304_x_at	209544_at	208763_s_at	204572_s_at	209031_at	208199_s_at	208213_s_at	208451_s_at	207275_s_at	207124_s_at	208166_at	205657_at
208421_at	206683_at	208121_s_at	208763_s_at	208154_at	208483_x_at	206046_at	208047_s_at	209921_at	206472_s_at	207531_at	208831_x_at	207517_at	205141_at	207056_s_at	207511_s_at	209453_at	209589_s_at	208881_x_at	204925_at	209042_s_at	208322_s_at	208260_at	208581_x_at	207338_s_at	207877_s_at	208280_at	205822_s_at
208430_s_at	207006_s_at	208438_s_at	208925_at	208237_x_at	208506_at	206096_at	208195_at	210162_s_at	206764_x_at	207673_at	208973_at	207669_at	205155_s_at	207528_s_at	207518_at	209674_at	209646_x_at	208962_s_at	205520_at	209335_at	208633_s_at	208345_s_at	208664_s_at	207620_s_at	208200_at	208426_x_at	205905_s_at
208529_at	207098_s_at	208581_x_at	208926_at	208384_s_at	209170_s_at	206115_at	208366_at	210165_at	207319_s_at	207823_s_at	209221_s_at	207689_at	205446_s_at	207626_s_at	207711_at	209921_at	209726_at	208963_x_at	205822_s_at	209341_s_at	208710_s_at	208370_s_at	209002_s_at	207791_s_at	208433_s_at	208489_at	206507_at
208728_s_at	207099_s_at	209097_s_at	208960_s_at	208476_s_at	209269_s_at	206621_s_at	208414_s_at	210182_at	207559_s_at	207974_s_at	209298_s_at	207800_at	205494_at	207761_s_at	207890_s_at	209940_at	209913_x_at	209218_at	206918_s_at	209394_at	208728_s_at	208417_at	209102_s_at	207982_at	208719_s_at	208633_s_at	206607_at
208917_x_at	207379_at	209185_s_at	208961_s_at	208536_s_at	209713_s_at	207098_s_at	208573_s_at	210300_at	207776_s_at	208385_at	209381_x_at	207998_s_at	205660_at	207949_s_at	207921_x_at	210385_s_at	209926_at	209276_s_at	206966_s_at	209508_x_at	208914_at	208523_x_at	209118_s_at	208097_s_at	208923_at	208664_s_at	206613_s_at
209119_x_at	207755_at	209189_at	209052_s_at	208583_x_at	209719_x_at	207185_at	209244_s_at	210367_s_at	207936_x_at	208657_s_at	209698_at	208332_at	205822_s_at	208926_at	208138_at	210405_x_at	210268_at	209502_s_at	207206_s_at	209556_at	208931_s_at	209414_at	209216_at	208499_s_at	208930_s_at	209047_at	206875_s_at
209235_at	207937_x_at	209280_at	209230_s_at	208814_at	209775_x_at	207554_x_at	209446_s_at	210550_s_at	207950_s_at	208725_at	209761_s_at	208529_at	206019_at	209062_x_at	208518_s_at	210435_at	210615_at	209544_at	207239_s_at	209618_at	209119_x_at	209530_at	209328_x_at	208853_s_at	209005_at	209197_at	207115_x_at
209359_x_at	208003_s_at	209292_at	209419_at	209136_s_at	209857_s_at	208630_at	209469_at	210608_s_at	208316_s_at	208989_s_at	209963_s_at	208611_s_at	206248_at	209146_at	208735_s_at	210442_at	210651_s_at	209682_at	207424_at	210021_s_at	209128_s_at	210005_at	209333_at	209098_s_at	209038_s_at	209227_at	207549_x_at
209443_at	208255_s_at	209359_x_at	209508_x_at	209168_at	209881_s_at	208734_x_at	209561_at	211029_x_at	208324_at	209413_at	210130_s_at	208886_at	206411_s_at	209538_at	208741_at	210596_at	210765_at	209786_at	207549_x_at	210036_s_at	209166_s_at	210059_s_at	209416_s_at	209184_s_at	209052_s_at	209473_at	208044_s_at
209570_s_at	208296_x_at	209383_at	209635_at	209364_at	210102_at	208766_s_at	209830_s_at	211182_x_at	208515_at	209414_at	210627_s_at	209098_s_at	206498_at	209588_at	209335_at	210666_at	210822_at	209856_x_at	207630_s_at	210091_s_at	209244_s_at	210141_s_at	209522_s_at	209185_s_at	209083_at	209622_at	208118_x_at
209589_s_at	208518_s_at	209614_at	209958_s_at	209369_at	210158_at	208838_at	209857_s_at	211194_s_at	208760_at	209438_at	211329_x_at	209230_s_at	206574_s_at	209689_at	209410_s_at	210695_s_at	210961_s_at	209882_at	207916_at	210378_s_at	209525_at	210166_at	209650_s_at	209276_s_at	209196_at	209636_at	208621_s_at
209672_s_at	208747_s_at	209767_s_at	210337_s_at	209371_s_at	210479_s_at	208841_s_at	209973_at	211280_s_at	209011_at	209528_s_at	211456_x_at	209383_at	206724_at	209716_at	209416_s_at	210705_s_at	211001_at	209890_at	208144_s_at	210414_at	209675_s_at	210301_at	209738_x_at	209280_at	209297_at	209655_s_at	208623_s_at
209703_x_at	209195_s_at	210039_s_at	210436_at	209522_s_at	210539_at	208986_at	209992_at	211305_x_at	209275_s_at	209667_at	211538_s_at	209457_at	206818_s_at	209765_at	210062_s_at	210743_s_at	211012_s_at	209935_at	208456_s_at	210539_at	209898_x_at	210349_at	209858_x_at	209441_at	209490_s_at	209937_at	208657_s_at
209736_at	209205_s_at	210165_at	210513_s_at	209531_at	210610_at	209084_s_at	210015_s_at	211393_at	209689_at	209938_at	211721_s_at	209529_at	207001_x_at	209848_s_at	210109_at	210858_x_at	211059_s_at	209962_at	208510_s_at	210745_at	209910_at	210499_s_at	210176_at	209566_at	209650_s_at	210061_at	209014_at
210036_s_at	209345_s_at	210337_s_at	210703_at	209544_at	210707_x_at	209434_s_at	210021_s_at	211424_x_at	209760_at	210242_x_at	212069_s_at	210100_s_at	207018_s_at	210069_at	210132_at	211012_s_at	211085_s_at	209970_x_at	208647_at	211052_s_at	210047_at	210640_s_at	210230_at	209682_at	209975_at	210176_at	209034_at
210210_at	209457_at	210524_x_at	211017_s_at	209646_x_at	210714_at	209438_at	210158_at	211456_x_at	209762_x_at	210282_at	212431_at	210129_s_at	207232_s_at	210286_s_at	210214_s_at	211076_x_at	211613_s_at	210033_s_at	208693_s_at	211087_x_at	210088_x_at	210752_s_at	210249_s_at	209834_at	210026_s_at	210360_s_at	209230_s_at
210307_s_at	209589_s_at	210579_s_at	211019_s_at	209715_at	210734_x_at	209741_x_at	210263_at	211484_s_at	209938_at	210444_at	212518_at	210307_s_at	207263_x_at	210358_x_at	211235_s_at	211126_s_at	211616_s_at	210220_at	208926_at	211123_at	210251_s_at	210783_x_at	210401_at	209909_s_at	210182_at	210366_at	209238_at
210309_at	209622_at	210617_at	211027_s_at	209893_s_at	210760_x_at	209814_at	210360_s_at	211506_s_at	210281_s_at	210458_s_at	212525_s_at	210498_at	207334_s_at	210539_at	211276_at	211133_x_at	211892_s_at	210223_s_at	209034_at	211261_at	210358_x_at	210874_s_at	210499_s_at	210041_s_at	211087_x_at	210379_s_at	209451_at
210634_at	209682_at	210693_at	211092_s_at	210058_at	210841_s_at	209938_at	210704_at	211722_s_at	210425_x_at	210531_at	212674_s_at	210499_s_at	208194_s_at	210592_s_at	211305_x_at	211144_x_at	212025_s_at	210568_s_at	209146_at	211364_at	210714_at	211426_x_at	210524_x_at	210045_at	211474_s_at	210584_s_at	209501_at
210679_x_at	209691_s_at	210822_at	211218_at	210319_x_at	211006_s_at	209970_x_at	210933_s_at	211795_s_at	210630_s_at	210926_at	212772_s_at	210513_s_at	208226_x_at	210711_at	211348_s_at	211230_s_at	212127_at	210676_x_at	209160_at	211551_at	211947_s_at	212096_s_at	210644_s_at	210120_s_at	211719_x_at	210671_x_at	209508_x_at
210933_s_at	209874_x_at	211019_s_at	211261_at	210894_s_at	211116_at	210144_at	211179_at	211808_s_at	210760_x_at	211774_s_at	212879_x_at	210605_s_at	208297_s_at	210808_s_at	211527_x_at	211260_at	212392_s_at	210796_x_at	209217_s_at	211792_s_at	212000_at	212243_at	211040_x_at	210242_x_at	211852_s_at	210765_at	209786_at
211330_s_at	209947_at	211086_x_at	211299_s_at	210993_s_at	211143_x_at	210293_s_at	211340_s_at	211958_at	211019_s_at	212518_at	212966_at	210764_s_at	208536_s_at	210854_x_at	211886_s_at	211295_x_at	212495_at	210801_at	209218_at	211881_x_at	212030_at	212306_at	211316_x_at	210284_s_at	211886_s_at	210785_s_at	209884_s_at
211748_x_at	210102_at	211203_s_at	211467_s_at	211016_x_at	211230_s_at	210596_at	211432_s_at	212157_at	211060_x_at	212618_at	212969_x_at	210797_s_at	208964_s_at	210879_s_at	212026_s_at	211559_s_at	212567_s_at	210813_s_at	209234_at	211973_at	212113_at	212467_at	211366_x_at	210538_s_at	212312_at	211106_at	209921_at
211798_x_at	210105_s_at	211355_x_at	211559_s_at	211092_s_at	211427_s_at	210608_s_at	211526_s_at	212158_at	211529_x_at	212722_s_at	213069_at	210854_x_at	209383_at	210932_s_at	212092_at	212521_s_at	212662_at	210839_s_at	209238_at	212475_at	212189_s_at	212555_at	211374_x_at	210616_s_at	212722_s_at	211139_s_at	209939_x_at
211810_s_at	210319_x_at	211402_x_at	211599_x_at	211205_x_at	211453_s_at	210907_s_at	211996_s_at	212185_x_at	211852_s_at	212924_s_at	213075_at	210870_s_at	209591_s_at	211019_s_at	212134_at	212533_at	213130_at	210923_at	209383_at	212748_at	212285_s_at	212617_at	211386_at	210678_s_at	212766_s_at	211250_s_at	210233_at
211976_at	210817_s_at	211668_s_at	211660_at	211256_x_at	211540_s_at	211038_s_at	212252_at	212259_s_at	211864_s_at	212980_at	213244_at	210932_s_at	209920_at	211162_x_at	212188_at	212780_at	213201_s_at	210950_s_at	209759_s_at	212784_at	212338_at	212658_at	211652_s_at	210733_at	212918_at	211424_x_at	210256_s_at
212223_at	210943_s_at	211833_s_at	211807_x_at	211325_x_at	211616_s_at	211056_s_at	212457_at	212423_at	212053_at	213038_at	213530_at	211048_s_at	210417_s_at	211433_x_at	212772_s_at	212968_at	213481_at	211444_at	209882_at	212991_at	212632_at	212913_at	211795_s_at	210764_s_at	213139_at	211450_s_at	210596_at
212562_s_at	210950_s_at	211863_x_at	212095_s_at	211658_at	211643_x_at	211250_s_at	212803_at	212942_s_at	212171_x_at	213138_at	213626_at	211124_s_at	210641_at	211458_s_at	212827_at	212976_at	213490_s_at	211559_s_at	209921_at	213396_s_at	212711_at	212930_at	212051_at	210847_x_at	213260_at	211541_s_at	210705_s_at
212819_at	211038_s_at	211886_s_at	212162_at	211792_s_at	211807_x_at	211628_x_at	213210_at	213210_at	212177_at	213208_at	213668_s_at	211182_x_at	210714_at	211559_s_at	212957_s_at	213066_at	213553_x_at	211708_s_at	210107_at	213724_s_at	212738_at	213094_at	212119_at	211051_s_at	213531_s_at	211626_x_at	211061_s_at
213155_at	211085_s_at	212272_at	212272_at	211911_x_at	211826_s_at	211764_s_at	213520_at	213332_at	212267_at	213437_at	213856_at	211280_s_at	210749_x_at	212093_s_at	213030_s_at	213075_at	213660_s_at	211753_s_at	210156_s_at	213825_at	212765_at	213207_s_at	212185_x_at	211143_x_at	213833_x_at	211654_x_at	211162_x_at
213285_at	211094_s_at	212274_at	212445_s_at	212093_s_at	212478_at	212138_at	213569_at	213380_x_at	212395_s_at	213625_at	213908_at	211364_at	211019_s_at	212272_at	213085_s_at	213103_at	214000_s_at	211881_x_at	210337_s_at	213942_at	212881_at	213324_at	212314_at	211182_x_at	213848_at	211798_x_at	211302_s_at
213431_x_at	211130_x_at	212386_at	212478_at	212376_s_at	212679_at	212204_at	214020_x_at	213432_at	212409_s_at	213631_x_at	214326_x_at	211602_s_at	211141_s_at	212302_at	213209_at	213114_at	214072_x_at	212117_at	210448_s_at	214058_at	212886_at	213518_at	212345_s_at	211566_x_at	214062_x_at	212092_at	211404_s_at
213547_at	211202_s_at	212642_s_at	212777_at	212475_at	212831_at	212499_s_at	214307_at	213466_at	212436_at	213642_at	214748_at	211718_at	211567_at	212339_at	213249_at	213256_at	214225_at	212119_at	210734_x_at	214213_x_at	212916_at	213600_at	212457_at	211661_x_at	214076_at	212324_s_at	211527_x_at
213551_x_at	211254_x_at	212706_at	212879_x_at	212772_s_at	213177_at	212567_s_at	214486_x_at	213629_x_at	212443_at	213684_s_at	214755_at	211936_at	211740_at	212471_at	213778_x_at	213261_at	214588_s_at	212736_at	210864_x_at	214372_x_at	213040_s_at	213635_s_at	212467_at	211919_s_at	214196_s_at	212477_at	211559_s_at
213641_at	211487_x_at	212859_x_at	213112_s_at	212931_at	213591_at	212606_at	214802_at	214021_x_at	212495_at	213791_at	214877_at	212090_at	211782_at	212705_x_at	213829_x_at	213394_at	214745_at	212741_at	210950_s_at	214563_at	213221_s_at	213712_at	212509_s_at	211936_at	214333_x_at	212557_at	211708_s_at
213716_s_at	211943_x_at	213111_at	213474_at	213173_at	213675_at	212636_at	214814_at	214081_at	212525_s_at	213810_s_at	214895_s_at	212253_x_at	212338_at	212864_at	213988_s_at	213455_at	214828_s_at	212853_at	211403_x_at	214606_at	213280_at	213833_x_at	212623_at	212084_at	214550_s_at	212876_at	211862_x_at
213719_s_at	212000_at	213162_at	213562_s_at	213224_s_at	213731_s_at	212725_s_at	214857_at	214156_at	212691_at	213853_at	215399_s_at	212617_at	212404_s_at	212902_at	214001_x_at	213555_at	214836_x_at	213000_at	211423_s_at	214616_at	213350_at	213900_at	212735_at	212172_at	214758_at	213028_at	212095_s_at
213728_at	212014_x_at	213348_at	213819_s_at	213481_at	213771_at	212726_at	215284_at	214191_at	212730_at	213912_at	215455_at	212811_x_at	212444_at	213343_s_at	214041_x_at	213595_s_at	215058_at	213562_s_at	211536_x_at	214699_x_at	213402_at	213963_s_at	212858_at	212184_s_at	215304_at	213375_s_at	212112_s_at
214335_at	212057_at	213367_at	213981_at	213529_at	213827_at	212834_at	215387_x_at	214385_s_at	212796_s_at	214041_x_at	215483_at	213003_s_at	212668_at	213393_at	214196_s_at	213596_at	215137_at	213836_s_at	211653_x_at	214744_s_at	213489_at	213981_at	213269_at	212390_at	215412_x_at	213728_at	212184_s_at
214793_at	212110_at	213500_at	214108_at	213569_at	214158_s_at	212851_at	215398_at	214817_at	212844_at	214194_at	215525_at	213094_at	213228_at	213771_at	214213_x_at	213686_at	215198_s_at	214033_at	211668_s_at	214760_at	213499_at	214209_s_at	213348_at	212444_at	215568_x_at	213791_at	212186_at
214848_at	212310_at	213575_at	214336_s_at	213572_s_at	214402_s_at	212863_x_at	215508_at	214915_at	212947_at	214213_x_at	215591_at	213112_s_at	213268_at	213836_s_at	214506_at	213791_at	215443_at	214177_s_at	211986_at	214816_x_at	213577_at	214448_x_at	213441_x_at	212672_at	215623_x_at	214090_at	212272_at
214867_at	212327_at	213641_at	214476_at	213575_at	214458_at	212884_x_at	215513_at	214935_at	212963_at	214232_at	215607_x_at	213176_s_at	213512_at	213844_at	214543_x_at	213965_s_at	215519_x_at	214283_at	212102_s_at	214885_at	213681_at	214582_at	213502_x_at	212902_at	215989_at	214137_at	212305_s_at
215070_x_at	212365_at	213827_at	214552_s_at	213679_at	214518_at	212944_at	215585_at	214979_at	213351_s_at	214316_x_at	215694_at	213371_at	213577_at	214130_s_at	214606_at	213999_at	215587_x_at	214326_x_at	212120_at	214892_x_at	213957_s_at	214676_x_at	213503_x_at	213106_at	216202_s_at	214282_at	212418_at
215131_at	212811_x_at	213930_at	214638_s_at	213875_x_at	214609_at	213064_at	215968_at	215058_at	213435_at	214428_x_at	215825_at	213486_at	213591_at	214176_s_at	214634_at	214452_at	215699_x_at	214819_at	212392_s_at	214933_at	214481_at	214953_s_at	213572_s_at	213258_at	216283_s_at	214415_at	212470_at
215200_x_at	212823_s_at	213964_x_at	214713_at	213999_at	214634_at	213102_at	215986_at	215138_s_at	213718_at	214508_x_at	215909_x_at	213575_at	213836_s_at	214177_s_at	214759_at	214469_at	215725_at	215055_at	212505_s_at	215214_at	214592_s_at	215126_at	213629_x_at	213260_at	216442_x_at	214525_x_at	212623_at
215344_at	212834_at	213973_at	214972_at	214019_at	214863_at	213140_s_at	216067_at	215356_at	213804_at	214556_at	215978_x_at	213629_x_at	214066_x_at	214216_s_at	214828_s_at	214508_x_at	215785_s_at	215093_at	212564_at	215358_x_at	214626_s_at	215356_at	213742_at	213358_at	216794_at	214613_at	212745_s_at
215397_x_at	212992_at	214000_s_at	215046_at	214073_at	215019_x_at	213178_s_at	216123_x_at	215410_at	214022_s_at	214848_at	216006_at	213651_at	214076_at	214236_at	214844_s_at	214539_at	215886_x_at	215649_s_at	212647_at	215360_at	214707_x_at	215366_at	213930_at	213397_x_at	217576_x_at	214818_at	212887_at
215443_at	213045_at	214137_at	215050_x_at	214138_at	215152_at	213355_at	216247_at	215847_at	214190_x_at	214923_at	216025_x_at	213976_at	214487_s_at	214355_x_at	214879_x_at	214657_s_at	216113_at	216060_s_at	212812_at	215499_at	214723_x_at	215485_s_at	214108_at	213776_at	217585_at	214877_at	213017_at
215609_at	213142_x_at	214238_at	215437_x_at	214337_at	215201_at	213473_at	216310_at	215850_s_at	214377_s_at	215218_s_at	216105_x_at	214185_at	214627_at	214444_s_at	215082_at	214906_x_at	216114_at	216503_s_at	212817_at	215506_s_at	215204_at	215761_at	214211_at	213836_s_at	217665_at	215178_x_at	213111_at
215628_x_at	213238_at	214311_at	215458_s_at	214934_at	215308_at	213508_at	216352_x_at	216013_at	214780_s_at	215343_at	216188_at	214470_at	214796_at	214609_at	215304_at	214972_at	216131_at	216582_at	212853_at	215513_at	215209_at	215824_at	214749_s_at	214108_at	217684_at	215342_s_at	213401_s_at
215820_x_at	213284_at	214872_at	215673_at	215131_at	215377_at	213728_at	216519_s_at	216110_x_at	214806_at	215439_x_at	216385_at	214692_s_at	214857_at	214818_at	215366_at	215071_s_at	216549_s_at	216607_s_at	212969_x_at	215519_x_at	215269_at	215916_at	214989_x_at	214310_s_at	217704_x_at	215507_x_at	213562_s_at
215834_x_at	213289_at	214910_s_at	215687_x_at	215159_s_at	215501_s_at	213827_at	216784_at	216189_at	214828_s_at	215615_x_at	216553_x_at	214923_at	215135_at	214999_s_at	215383_x_at	215182_x_at	216551_x_at	216626_at	213030_s_at	215585_at	215343_at	216044_x_at	215009_s_at	214354_x_at	217719_at	215575_at	213624_at
215968_at	213347_x_at	215212_at	216034_at	215457_at	215701_at	214140_at	216788_at	216248_s_at	214953_s_at	215693_x_at	217040_x_at	215519_x_at	215148_s_at	215185_at	215526_at	215415_s_at	216668_at	216747_at	213222_at	215616_s_at	216645_at	216300_x_at	215012_at	214701_s_at	218041_x_at	215589_at	213792_s_at
216121_at	213575_at	215218_s_at	216080_s_at	215543_s_at	215756_at	214322_at	216856_s_at	216462_at	215032_at	215822_x_at	217045_x_at	215685_s_at	215253_s_at	215209_at	215583_at	215670_s_at	216730_at	217014_s_at	213490_s_at	215764_x_at	216740_at	216455_at	215203_at	215162_at	218070_s_at	215995_x_at	213836_s_at
216189_at	213672_at	215310_at	216100_s_at	215778_x_at	215892_at	214334_x_at	216905_s_at	216739_at	215040_at	215850_s_at	217223_s_at	215706_x_at	215372_x_at	215372_x_at	215591_at	216095_x_at	216739_at	217149_x_at	213577_at	215766_at	216803_at	216647_at	215246_at	215200_x_at	218177_at	216146_at	213861_s_at
216225_at	213758_at	215328_at	216147_at	215856_at	216022_at	214697_s_at	216940_x_at	216758_at	215260_s_at	215909_x_at	217257_at	215838_at	215519_x_at	215622_x_at	215757_at	216197_at	216749_at	217218_at	213729_at	215985_at	216941_s_at	216762_at	215583_at	215304_at	218257_s_at	216226_at	213988_s_at
216462_at	213854_at	215402_at	216159_s_at	215920_s_at	216256_at	214791_at	217038_at	216767_at	215484_at	215954_s_at	217602_at	216511_s_at	215551_at	215649_s_at	216175_at	216220_s_at	216750_at	217253_at	214022_s_at	216110_x_at	217016_x_at	216823_at	215637_at	215333_x_at	218264_at	216429_at	214130_s_at
216538_at	214337_at	215595_x_at	216607_s_at	216189_at	216488_s_at	215063_x_at	217066_s_at	216948_at	215497_s_at	215966_x_at	217653_x_at	216549_s_at	215595_x_at	215705_at	216188_at	216277_at	216900_s_at	217407_x_at	214355_x_at	216159_s_at	217027_x_at	217291_at	215756_at	215358_x_at	218476_at	216486_x_at	214250_at
216547_at	214338_at	215855_s_at	216683_at	216421_at	216614_at	215253_s_at	217246_s_at	217165_x_at	215706_x_at	216650_at	217713_x_at	216823_at	215641_at	215778_x_at	216410_at	216292_at	216940_x_at	217549_at	214544_s_at	216243_s_at	217152_at	217350_at	215856_at	215373_x_at	218532_s_at	216761_at	214428_x_at
216809_at	214537_at	215881_x_at	216882_s_at	216480_x_at	217042_at	215910_s_at	217273_at	217284_x_at	215773_x_at	216751_at	217729_s_at	216871_at	215670_s_at	215800_at	216628_at	216873_s_at	217054_at	217662_x_at	215306_at	216349_at	217612_at	217352_at	215888_at	215977_x_at	218559_s_at	216856_s_at	214446_at
216882_s_at	214607_at	215927_at	216976_s_at	216915_s_at	217121_at	216037_x_at	217844_at	217293_at	216052_x_at	216803_at	217937_s_at	216992_s_at	216062_at	215848_at	216705_s_at	216920_s_at	217204_at	217765_at	215509_s_at	216398_at	217631_at	217672_x_at	215938_s_at	216052_x_at	218562_s_at	216882_s_at	214486_x_at
217070_at	214614_at	215945_s_at	216985_s_at	216933_x_at	217207_s_at	216384_x_at	218029_at	217559_at	216064_s_at	216997_x_at	218086_at	217168_s_at	216147_at	216057_at	216788_at	216944_s_at	217257_at	217775_s_at	215711_s_at	216702_x_at	217796_s_at	217715_x_at	216699_s_at	216080_s_at	218578_at	216909_at	214688_at
217158_at	215066_at	216426_at	216993_s_at	216940_x_at	217453_at	216988_s_at	218608_at	217574_at	216387_x_at	217336_at	218206_x_at	217206_at	216177_at	216062_at	216903_s_at	216947_at	217272_s_at	217998_at	216119_s_at	216791_at	217891_at	217800_s_at	216703_at	216449_x_at	218822_s_at	216976_s_at	215023_s_at
217205_at	215544_s_at	216530_at	217173_s_at	216958_s_at	217503_at	217028_at	218765_at	217589_at	216945_x_at	217478_s_at	218222_x_at	217223_s_at	216189_at	216188_at	216981_x_at	217168_s_at	217340_at	218070_s_at	216377_x_at	217000_at	217951_s_at	218248_at	217047_s_at	216450_x_at	218855_at	217038_at	215152_at
217291_at	215828_at	216595_at	217208_s_at	216973_s_at	217662_x_at	217408_at	218900_at	217659_at	216985_s_at	217605_at	218417_s_at	217239_x_at	216349_at	216813_at	217054_at	217388_s_at	217507_at	218510_x_at	216449_x_at	217211_at	218650_at	218359_at	217128_s_at	217168_s_at	218888_s_at	217044_s_at	215555_at
217353_at	215834_x_at	216920_s_at	217309_s_at	217416_x_at	218264_at	217645_at	218938_at	217715_x_at	217099_s_at	218050_at	218509_at	217649_at	216407_at	217149_x_at	217475_s_at	217498_at	217891_at	218729_at	216526_x_at	217548_at	218727_at	218416_s_at	217165_x_at	217326_x_at	219010_at	217104_at	215921_at
217437_s_at	215931_s_at	217102_at	217416_x_at	217445_s_at	218414_s_at	218102_at	218944_at	218183_at	217149_x_at	218121_at	218674_at	217654_at	216607_s_at	217212_s_at	217690_at	217664_at	218030_at	218813_s_at	216883_x_at	217735_s_at	218742_at	218833_at	217168_s_at	217430_x_at	219027_s_at	217142_at	216035_x_at
217518_at	216094_at	217127_at	217430_x_at	217501_at	218416_s_at	218136_s_at	219054_at	218413_s_at	217347_at	218182_s_at	218682_s_at	217678_at	216675_at	217416_x_at	217701_x_at	218322_s_at	218087_s_at	218847_at	217039_x_at	218359_at	218810_at	218907_s_at	217324_at	217701_x_at	219081_at	217166_at	216121_at
217622_at	216100_s_at	217152_at	217464_at	217656_at	219095_at	218171_at	219094_at	218832_x_at	217456_x_at	218266_s_at	218860_at	217847_s_at	217189_s_at	217757_at	218121_at	218417_s_at	218720_x_at	218855_at	217168_s_at	218902_at	218855_at	219061_s_at	217554_at	217741_s_at	219170_at	217199_s_at	216125_s_at
217696_at	216705_s_at	217173_s_at	217576_x_at	217670_at	219153_s_at	218193_s_at	219248_at	218995_s_at	217555_at	218341_at	218954_s_at	218426_s_at	217333_at	218352_at	218429_s_at	218686_s_at	218813_s_at	218910_at	217188_s_at	219103_at	218903_s_at	219094_at	218030_at	217799_x_at	219328_at	217203_at	216310_at
218292_s_at	217039_x_at	217490_at	217584_at	217876_at	219225_at	218284_at	219278_at	219145_at	217588_at	218554_s_at	219040_at	218880_at	217432_s_at	218409_s_at	218725_at	218702_at	218985_at	219256_s_at	217436_x_at	219205_at	218907_s_at	219127_at	218312_s_at	217853_at	219349_s_at	217684_at	216450_x_at
218621_at	217516_x_at	217558_at	217847_s_at	218503_at	219542_at	218355_at	219381_at	219601_s_at	217726_at	218868_at	219111_s_at	218925_s_at	217518_at	218466_at	218753_at	218807_at	219227_at	219376_at	217511_at	219209_at	218921_at	219314_s_at	218332_at	218145_at	219369_s_at	217692_at	216607_s_at
218658_s_at	217731_s_at	217641_at	217859_s_at	219018_s_at	219601_s_at	218426_s_at	219468_s_at	219687_at	217994_x_at	218971_s_at	219235_s_at	219025_at	217534_at	218613_at	218944_at	218833_at	219486_at	219410_at	217775_s_at	219248_at	218965_s_at	219343_at	218414_s_at	218182_s_at	219375_at	217721_at	217094_s_at
218790_s_at	217963_s_at	217783_s_at	217999_s_at	219247_s_at	219720_s_at	218516_s_at	219500_at	219847_at	218013_x_at	219012_s_at	219453_at	219256_s_at	218000_s_at	218627_at	218963_s_at	218943_s_at	219500_at	219551_at	218041_x_at	219282_s_at	219013_at	219353_at	218532_s_at	218208_at	219486_at	217799_x_at	217100_s_at
219049_at	218023_s_at	218015_s_at	218113_at	219259_at	219769_at	218647_s_at	219663_s_at	219912_s_at	218030_at	219165_at	219618_at	219270_at	218727_at	218696_at	218978_s_at	218954_s_at	219503_s_at	219680_at	218093_s_at	219411_at	219257_s_at	219805_at	218584_at	218696_at	219532_at	218183_at	217731_s_at
219235_s_at	218047_at	218145_at	218245_at	219337_at	219891_at	218772_x_at	219749_at	219944_at	218311_at	219477_s_at	219688_at	219601_s_at	218731_s_at	218815_s_at	219331_s_at	219103_at	219674_s_at	220081_x_at	218145_at	219811_at	219261_at	219814_at	219448_at	218706_s_at	219576_at	218433_at	218043_s_at
219287_at	218262_at	218234_at	218457_s_at	219376_at	219999_at	218879_s_at	219766_at	220077_at	218366_x_at	219556_at	219760_at	219732_at	218918_at	218927_s_at	219435_at	219377_at	219708_at	220518_at	218207_s_at	219884_at	219328_at	219875_s_at	219506_at	218964_at	219657_s_at	218874_s_at	218241_at
219379_x_at	218453_s_at	218376_s_at	218466_at	219447_s_at	220131_at	219003_s_at	219875_s_at	220268_at	218494_s_at	219617_at	219891_at	219738_s_at	219513_s_at	219020_at	219847_at	219496_at	219882_at	220606_s_at	218222_x_at	219892_at	219377_at	219963_at	219680_at	219054_at	219769_at	219488_at	218420_s_at
219441_s_at	218589_at	219437_s_at	219371_s_at	219742_at	220207_at	219020_at	219905_at	220427_at	218537_at	219657_s_at	220039_s_at	219899_x_at	219532_at	219075_at	219852_s_at	219515_at	219886_at	220869_at	218304_s_at	219919_s_at	219451_at	220087_at	219690_at	219077_s_at	219797_at	219700_at	218562_s_at
219577_s_at	219103_at	219556_at	219390_at	219751_at	220208_at	219033_at	219983_at	220486_x_at	218719_s_at	219676_at	220151_at	219934_s_at	219566_at	219222_at	220035_at	219600_s_at	219982_s_at	221164_x_at	218310_at	219925_at	219635_at	220208_at	219752_at	219093_at	219862_s_at	219707_at	218769_s_at
219609_at	219211_at	219784_at	219496_at	219892_at	220215_at	219055_at	220029_at	220490_at	218848_at	219740_at	220572_at	219964_at	219608_s_at	219223_at	220084_at	219738_s_at	220086_at	221167_s_at	218361_at	220017_x_at	220411_x_at	220357_s_at	219848_s_at	219218_at	219934_s_at	219735_s_at	218806_s_at
219844_at	219284_at	220050_at	219604_s_at	219905_at	220252_x_at	219065_s_at	220076_at	220529_at	218954_s_at	219749_at	220734_s_at	220029_at	219611_s_at	219358_s_at	220177_s_at	219749_at	220111_s_at	221195_at	218698_at	220035_at	220557_s_at	220463_at	220042_x_at	219379_x_at	220079_s_at	220154_at	218976_at
219900_s_at	219560_at	220174_at	219657_s_at	219998_at	220308_at	219157_at	220134_x_at	220574_at	219027_s_at	220021_at	220855_at	220114_s_at	219613_s_at	219629_at	220805_at	219966_x_at	220154_at	221221_s_at	218780_at	220219_s_at	220671_at	220560_at	220128_s_at	219474_at	220175_s_at	220210_at	219322_s_at
219943_s_at	219708_at	220388_at	219858_s_at	220033_at	220350_at	219166_at	220333_at	220854_at	219111_s_at	220537_at	220944_at	220266_s_at	220091_at	219847_at	220894_x_at	220012_at	220833_at	221266_s_at	218781_at	220344_at	220757_s_at	220566_at	220330_s_at	219657_s_at	220229_s_at	220268_at	219342_at
219977_at	219846_at	220516_at	220076_at	220219_s_at	220354_at	219318_x_at	220341_s_at	221035_s_at	219235_s_at	220549_at	221045_s_at	220283_at	220186_s_at	220012_at	220906_at	220119_at	220835_s_at	221318_at	218852_at	220560_at	220892_s_at	220653_at	220349_s_at	219716_at	220410_s_at	220453_at	219880_at
220084_at	219858_s_at	220740_s_at	220267_at	220411_x_at	220434_at	219469_at	220369_at	221146_at	219339_s_at	220797_at	221528_s_at	220366_at	220296_at	220157_x_at	221010_s_at	220126_at	220844_at	221473_x_at	219329_s_at	220609_at	221135_s_at	220665_at	220904_at	219817_at	220651_s_at	220584_at	219892_at
220128_s_at	219880_at	220830_at	220434_at	220526_s_at	220514_at	219752_at	220424_at	221281_at	219755_at	220941_s_at	221567_at	220557_s_at	220395_at	220306_at	221016_s_at	220128_s_at	220870_at	221485_at	219339_s_at	220712_at	221610_s_at	220672_at	221378_at	220041_at	220924_s_at	220824_at	220254_at
220277_at	220250_at	220954_s_at	220650_s_at	220898_at	220533_at	220048_at	220469_at	221375_at	220633_s_at	220962_s_at	221572_s_at	220738_s_at	220411_x_at	220743_at	221039_s_at	220157_x_at	220872_at	221530_s_at	219676_at	220744_s_at	221764_at	220819_at	221631_at	220254_at	220963_s_at	220859_at	221060_s_at
220716_at	220374_at	220985_s_at	220721_at	221015_s_at	220666_at	220199_s_at	220777_at	221529_s_at	220661_s_at	220973_s_at	221590_s_at	220776_at	220914_at	221010_s_at	221412_at	220219_s_at	220981_x_at	221601_s_at	219781_s_at	221063_x_at	221877_at	221045_s_at	221660_at	220258_s_at	221261_x_at	220877_at	221194_s_at
221060_s_at	220685_at	221107_at	220911_s_at	221094_s_at	220844_at	220397_at	220905_at	221658_s_at	220773_s_at	220992_s_at	221625_at	221489_s_at	221049_s_at	221435_x_at	221432_s_at	220537_at	221010_s_at	221765_at	219801_at	221077_at	222024_s_at	221058_s_at	221689_s_at	220692_at	221496_s_at	220938_s_at	221205_at
221165_s_at	220720_x_at	221134_at	221195_at	221229_s_at	220899_at	220606_s_at	221294_at	221714_s_at	221077_at	221005_s_at	221686_s_at	221682_s_at	221577_x_at	221577_x_at	221701_s_at	220562_at	221031_s_at	221808_at	220128_s_at	221192_x_at	222252_x_at	221458_at	221788_at	220725_x_at	221541_at	221043_at	221511_x_at
221170_at	220999_s_at	221188_s_at	221308_at	221601_s_at	221145_at	220730_at	221525_at	221857_s_at	221287_at	221192_x_at	221704_s_at	221789_x_at	221664_s_at	221611_s_at	221716_s_at	220641_at	221172_at	221851_at	220261_s_at	221308_at	222327_x_at	221627_at	221871_s_at	220738_s_at	221572_s_at	221120_at	221559_s_at
221375_at	221050_s_at	221750_at	221615_at	221772_s_at	221406_s_at	221230_s_at	221640_s_at	222112_at	221567_at	221770_at	221783_at	221797_at	221750_at	221750_at	221745_at	220987_s_at	221290_s_at	221888_at	220454_s_at	221823_at	222341_x_at	221727_at	221953_s_at	221734_at	221604_s_at	221154_at	221561_at
221556_at	221214_s_at	221757_at	221754_s_at	221893_s_at	221413_at	221248_s_at	221724_s_at	222238_s_at	221590_s_at	221912_s_at	222111_at	221838_at	221755_at	221778_at	222031_at	221131_at	221629_x_at	221939_at	220924_s_at	222041_at	32137_at	221747_at	221985_at	222043_at	221641_s_at	221164_x_at	221824_s_at
221660_at	221522_at	221792_at	221778_at	221947_at	222009_at	221524_s_at	221800_s_at	222290_at	221617_at	222026_at	222200_s_at	221947_at	221864_at	221867_at	222057_at	221471_at	221862_at	222160_at	221473_x_at	222048_at	34187_at	221874_at	222207_x_at	222061_at	221753_at	221315_s_at	221857_s_at
221757_at	221797_at	221973_at	221985_at	222208_s_at	222121_at	221568_s_at	222041_at	222349_x_at	222026_at	222137_at	222252_x_at	222082_at	221868_at	221985_at	222061_at	221546_at	221867_at	222301_at	221880_s_at	222284_at	45288_at	222006_at	222218_s_at	222195_s_at	221876_at	221646_s_at	221892_at
222057_at	221909_at	221986_s_at	221986_s_at	222304_x_at	222283_at	221596_s_at	222117_s_at	33304_at	222156_x_at	222179_at	222335_at	222114_x_at	221964_at	222108_at	222245_s_at	222094_at	221888_at	222303_at	221881_s_at	222324_at	49329_at	222159_at	222339_x_at	222237_s_at	222024_s_at	221866_at	221985_at
222265_at	222090_at	222111_at	222177_s_at	222380_s_at	222302_at	221749_at	222184_at	35147_at	35820_at	222191_s_at	222347_at	222218_s_at	35617_at	222300_at	222263_at	222120_at	221894_at	35436_at	221903_s_at	222381_at	64474_g_at	222185_at	47773_at	222270_at	222062_at	221997_s_at	221986_s_at
222272_x_at	222162_s_at	222185_at	222249_at	35179_at	222361_at	221918_at	222188_at	35846_at	38691_s_at	222270_at	34697_at	222268_x_at	36907_at	36499_at	222315_at	222137_at	222114_x_at	36829_at	222112_at	32137_at	AFFX-BioC-3_at	32540_at	49452_at	222293_at	222348_at	222061_at	222057_at
222350_at	222269_at	222334_at	222264_at	35776_at	32699_s_at	222256_s_at	37004_at	37831_at	52005_at	49485_at	47083_at	222350_at	37028_at	49049_at	32029_at	222145_at	36554_at	37005_at	44783_s_at	35150_at	AFFX-BioC-5_at	38398_at	51228_at	222349_x_at	32259_at	222136_x_at	222376_at
50965_at	222327_x_at	32540_at	222337_at	50400_at	38447_at	32540_at	51226_at	38241_at	56821_at	635_s_at	61297_at	37028_at	57715_at	56919_at	33768_at	35160_at	37005_at	38069_at	63825_at	39650_s_at	AFFX-r2-Ec-bioB-M_at	52651_at	56256_at	36711_at	32502_at	45288_at	32811_at
52741_at	35626_at	35617_at	34449_at	64900_at	39313_at	52285_f_at	61734_at	48031_r_at	64440_at	64488_at	78383_at	52651_at	64432_at	64064_at	34449_at	40273_at	38671_at	44669_at	AFFX-HUMISGF3A/M97935_MA_at	49111_at	AFFX-r2-Ec-bioC-5_at	64488_at	635_s_at	635_s_at	57588_at	45297_at	37943_at
201228_s_at	179_at	200690_at	200644_at	200724_at	200961_at	200648_s_at	201294_s_at	200835_s_at	200655_s_at	202152_x_at	177_at	200056_s_at	1598_g_at	201027_s_at	1316_at	179_at	160020_at	200049_at	200098_s_at	201087_at	201048_x_at	1598_g_at	1487_at	201299_s_at	201315_x_at	200601_at	200808_s_at
201319_at	200769_s_at	200874_s_at	201038_s_at	201069_at	201205_at	200766_at	201328_at	201008_s_at	200809_x_at	202331_at	200012_x_at	200979_at	201018_at	201420_s_at	201442_s_at	200707_at	200070_at	200676_s_at	200734_s_at	201234_at	201156_s_at	200835_s_at	200020_at	201556_s_at	201341_at	200857_s_at	201281_at
201538_s_at	200959_at	201069_at	201140_s_at	201419_at	201526_at	200959_at	202073_at	201009_s_at	200891_s_at	202445_s_at	200026_at	201026_at	201129_at	201673_s_at	201604_s_at	201017_at	200646_s_at	200913_at	200808_s_at	201450_s_at	201235_s_at	200906_s_at	200658_s_at	201733_at	201360_at	200979_at	201396_s_at
201556_s_at	201010_s_at	201122_x_at	201205_at	202249_s_at	201657_at	201040_at	202290_at	201010_s_at	201143_s_at	202531_at	200725_x_at	201038_s_at	201528_at	201728_s_at	201945_at	201083_s_at	201041_s_at	200955_at	201110_s_at	201461_s_at	201538_s_at	201039_s_at	200690_at	202152_x_at	201439_at	201360_at	201822_at
201888_s_at	201038_s_at	201181_at	201370_s_at	202281_at	201679_at	201221_s_at	202450_s_at	201055_s_at	201242_s_at	202962_at	202661_at	201060_x_at	201565_s_at	201759_at	202150_s_at	201182_s_at	201073_s_at	200988_s_at	201129_at	201611_s_at	201551_s_at	201158_at	200769_s_at	202183_s_at	201848_s_at	201473_at	202025_x_at
201904_s_at	201469_s_at	201282_at	201565_s_at	202672_s_at	201692_at	201401_s_at	202876_s_at	201340_s_at	201702_s_at	203003_at	202701_at	201498_at	201667_at	201834_at	202426_s_at	201291_s_at	201447_at	201111_at	201356_at	202172_at	201843_s_at	201167_x_at	200828_s_at	202216_x_at	202132_at	201625_s_at	202373_s_at
202459_s_at	201531_at	201370_s_at	201890_at	202793_at	201835_s_at	201613_s_at	203308_x_at	201702_s_at	201849_at	203019_x_at	202828_s_at	201566_x_at	201680_x_at	202115_s_at	202455_at	201312_s_at	201473_at	201114_x_at	201436_at	202883_s_at	201972_at	201222_s_at	200894_s_at	202249_s_at	202436_s_at	201925_s_at	202463_s_at
202518_at	201566_x_at	201604_s_at	202281_at	202849_x_at	202140_s_at	201804_x_at	203311_s_at	201719_s_at	202124_s_at	203096_s_at	203736_s_at	201625_s_at	201759_at	202132_at	202472_at	201555_at	201678_s_at	201143_s_at	201513_at	203020_at	202247_s_at	201465_s_at	200895_s_at	202430_s_at	202566_s_at	202103_at	202482_x_at
202692_s_at	201627_s_at	201767_s_at	202482_x_at	203130_s_at	202204_s_at	201945_at	203421_at	201879_at	202257_s_at	203555_at	203980_at	201627_s_at	201838_s_at	202255_s_at	202684_s_at	201566_x_at	201745_at	201155_s_at	201667_at	203090_at	202873_at	201856_s_at	201017_at	202450_s_at	202616_s_at	202131_s_at	202532_s_at
202756_s_at	201647_s_at	201797_s_at	202528_at	203249_at	202426_s_at	202049_s_at	203503_s_at	201942_s_at	202476_s_at	203644_s_at	204221_x_at	201662_s_at	201936_s_at	202316_x_at	202723_s_at	201813_s_at	202278_s_at	201195_s_at	201712_s_at	203094_at	203174_s_at	202023_at	201018_at	202513_s_at	202626_s_at	202145_at	202613_at
202782_s_at	201677_at	201979_s_at	202650_s_at	203263_s_at	202681_at	202161_at	203566_s_at	202049_s_at	202769_at	203823_at	204253_s_at	201750_s_at	202144_s_at	202415_s_at	202770_s_at	202065_s_at	202315_s_at	201274_at	201890_at	203227_s_at	203522_at	202067_s_at	201075_s_at	202532_s_at	203051_at	202253_s_at	202774_s_at
202904_s_at	202264_s_at	202115_s_at	202706_s_at	203363_s_at	202715_at	202204_s_at	203720_s_at	202248_at	203141_s_at	203932_at	204268_at	201906_s_at	202302_s_at	202668_at	202967_at	202115_s_at	202639_s_at	201421_s_at	201999_s_at	203253_s_at	203615_x_at	202255_s_at	201196_s_at	202639_s_at	203388_at	202260_s_at	202945_at
203337_x_at	202430_s_at	202182_at	202840_at	203388_at	202751_at	202367_at	203731_s_at	202354_s_at	203162_s_at	204136_at	204298_s_at	202034_x_at	202435_s_at	202692_s_at	203165_s_at	202203_s_at	202650_s_at	201478_s_at	202056_at	203410_at	203911_at	202781_s_at	201414_s_at	202791_s_at	203672_x_at	202308_at	202991_at
203450_at	202480_s_at	202331_at	202876_s_at	203419_at	202997_s_at	202384_s_at	203767_s_at	202436_s_at	203307_at	204287_at	204445_s_at	202308_at	202436_s_at	202801_at	203379_at	202248_at	202764_at	201487_at	202136_at	203457_at	204132_s_at	202821_s_at	201435_s_at	202924_s_at	203758_at	202381_at	203119_at
203514_at	202528_at	202430_s_at	203022_at	203420_at	203027_s_at	202518_at	203901_at	202474_s_at	203665_at	204333_s_at	204501_at	202314_at	202482_x_at	202839_s_at	203457_at	202532_s_at	203015_s_at	201586_s_at	202175_at	203500_at	204671_s_at	203059_s_at	201473_at	203206_at	204080_at	202389_s_at	203122_at
203927_at	202532_s_at	202577_s_at	203188_at	203490_at	203081_at	202556_s_at	204019_s_at	202549_at	203848_at	204413_at	204673_at	202389_s_at	202668_at	202979_s_at	203505_at	202534_x_at	203141_s_at	201611_s_at	202217_at	203593_at	204689_at	203096_s_at	201478_s_at	203233_at	204269_at	202470_s_at	203158_s_at
204117_at	202545_at	202742_s_at	203368_at	203528_at	203208_s_at	202643_s_at	204025_s_at	202970_at	203928_x_at	204668_at	204688_at	202807_s_at	202753_at	203056_s_at	203620_s_at	202556_s_at	203154_s_at	201674_s_at	202221_s_at	203598_s_at	204751_x_at	203231_s_at	201551_s_at	203268_s_at	204284_at	202534_x_at	203242_s_at
204160_s_at	203085_s_at	202763_at	203500_at	203592_s_at	203249_at	202667_s_at	204120_s_at	203186_s_at	203973_s_at	204756_at	204747_at	203162_s_at	202865_at	203442_x_at	203787_at	202562_s_at	203525_s_at	201795_at	202254_at	203718_at	204780_s_at	203242_s_at	201614_s_at	203495_at	204383_at	202749_at	203871_at
204261_s_at	203235_at	202830_s_at	203609_s_at	203623_at	203299_s_at	202831_at	204132_s_at	203276_at	204032_at	204925_at	204815_s_at	203225_s_at	202910_s_at	203486_s_at	203826_s_at	202600_s_at	203624_at	201797_s_at	202615_at	203933_at	204781_s_at	203249_at	201801_s_at	203500_at	204507_s_at	202806_at	204068_at
204313_s_at	203452_at	202864_s_at	203806_s_at	203727_at	203412_at	203186_s_at	204137_at	203369_x_at	204329_s_at	204950_at	204909_at	203255_at	202987_at	203608_at	204032_at	202619_s_at	203830_at	201834_at	202818_s_at	204108_at	204993_at	203479_s_at	201873_s_at	203589_s_at	204651_at	202970_at	204218_at
204384_at	203763_at	202925_s_at	203860_at	203806_s_at	203602_s_at	203189_s_at	204200_s_at	203444_s_at	204455_at	205023_at	205054_at	203310_at	203225_s_at	203754_s_at	204689_at	202840_at	203907_s_at	202051_s_at	203054_s_at	204449_at	205166_at	203532_x_at	201912_s_at	203625_x_at	204659_s_at	203055_s_at	204254_s_at
204619_s_at	203975_s_at	203176_s_at	203926_x_at	203884_s_at	203815_at	203416_at	204217_s_at	203451_at	204478_s_at	205172_x_at	205211_s_at	203644_s_at	203255_at	203920_at	204698_at	202868_s_at	203987_at	202056_at	203095_at	204527_at	205215_at	203533_s_at	201970_s_at	203696_s_at	204691_x_at	203275_at	204265_s_at
204634_at	204056_s_at	203196_at	204008_at	203904_x_at	203942_s_at	203546_at	204436_at	203479_s_at	204819_at	205425_at	205365_at	203650_at	203419_at	203976_s_at	204859_s_at	203171_s_at	204062_s_at	202107_s_at	203180_at	204666_s_at	205252_at	203959_s_at	202069_s_at	203723_at	204741_at	203598_s_at	204381_at
204841_s_at	204101_at	203235_at	204083_s_at	204081_at	203977_at	203577_at	204479_at	203504_s_at	204902_s_at	205726_at	205525_at	203865_s_at	203682_s_at	204008_at	204936_at	203255_at	204068_at	202115_s_at	203202_at	204728_s_at	205360_at	204015_s_at	202126_at	203845_at	204877_s_at	203646_at	204383_at
204877_s_at	204104_at	203522_at	204133_at	204204_at	204080_at	203592_s_at	204507_s_at	203665_at	204917_s_at	206019_at	205542_at	203911_at	203708_at	204033_at	204947_at	203276_at	204079_at	202256_at	203414_at	204886_at	205408_at	204077_x_at	202149_at	203899_s_at	205048_s_at	203822_s_at	204741_at
205060_at	204433_s_at	203782_s_at	204267_x_at	204329_s_at	204146_at	203602_s_at	204639_at	203823_at	204985_s_at	206088_at	205569_at	204003_s_at	203769_s_at	204133_at	205071_x_at	203277_at	204123_at	202440_s_at	203608_at	205060_at	205698_s_at	204191_at	202234_s_at	204080_at	205145_s_at	203840_at	204742_s_at
205139_s_at	204569_at	203805_s_at	204292_x_at	204421_s_at	204158_s_at	204029_at	204689_at	204296_at	205187_at	206412_at	205579_at	204120_s_at	204016_at	204282_s_at	205096_at	203289_s_at	204423_at	202449_s_at	204003_s_at	205197_s_at	205793_x_at	204193_at	202330_s_at	204101_at	205198_s_at	203926_x_at	204826_at
205164_at	204902_s_at	203943_at	204316_at	204451_at	204193_at	204065_at	204790_at	204867_at	205211_s_at	206483_at	205626_s_at	204159_at	204263_s_at	204284_at	205129_at	203370_s_at	204447_at	202483_s_at	204142_at	205362_s_at	206140_at	204257_at	202444_s_at	204300_at	205203_at	203935_at	204927_at
205250_s_at	204927_at	203958_s_at	204441_s_at	204464_s_at	204227_s_at	204140_at	204886_at	204929_s_at	205218_at	206590_x_at	205679_x_at	204176_at	204405_x_at	204403_x_at	205446_s_at	203437_at	204464_s_at	202690_s_at	204264_at	205583_s_at	206473_at	204294_at	202613_at	204550_x_at	205313_at	203956_at	204936_at
205281_s_at	205061_s_at	204171_at	204567_s_at	204729_s_at	204296_at	204147_s_at	204971_at	205187_at	205230_at	206594_at	205749_at	204183_s_at	204748_at	204458_at	205458_at	203505_at	204632_at	202725_at	204386_s_at	205618_at	206527_at	204335_at	202635_s_at	204578_at	205323_s_at	204106_at	205005_s_at
205313_at	205698_s_at	204241_at	204650_s_at	204906_at	204639_at	204275_at	205063_at	205195_at	205310_at	206687_s_at	205818_at	204244_s_at	204759_at	204573_at	205618_at	203646_at	204761_at	202753_at	204495_s_at	205760_s_at	206862_at	204552_at	202706_s_at	204698_at	205486_at	204172_at	205035_at
205327_s_at	205717_x_at	204275_at	204994_at	204925_at	204682_at	204276_at	205184_at	205316_at	205380_at	206838_at	205838_at	204263_s_at	204808_s_at	204632_at	205709_s_at	204306_s_at	204893_s_at	202791_s_at	205235_s_at	206003_at	206916_x_at	205121_at	202934_at	204727_at	205710_at	204193_at	205131_x_at
205379_at	205739_x_at	204300_at	205003_at	205146_x_at	205170_at	204383_at	205548_s_at	205398_s_at	205411_at	206962_x_at	205872_x_at	204314_s_at	204824_at	204659_s_at	205746_s_at	204355_at	205005_s_at	202814_s_at	205796_at	206461_x_at	207098_s_at	205248_at	203023_at	204986_s_at	205896_at	204306_s_at	205210_at
205494_at	205793_x_at	204447_at	205054_at	205309_at	205435_s_at	204473_s_at	205647_at	205457_at	205430_at	207117_at	205910_s_at	204316_at	204871_at	204695_at	205756_s_at	204374_s_at	205193_at	202870_s_at	205877_s_at	206544_x_at	207223_s_at	205323_s_at	203082_at	205010_at	206006_s_at	204401_at	205469_s_at
205499_at	206096_at	204492_at	205129_at	205502_at	205500_at	204555_s_at	205822_s_at	205574_x_at	205617_at	207133_x_at	205942_s_at	204407_at	204884_s_at	204899_s_at	205799_s_at	204572_s_at	205255_x_at	202911_at	205909_at	206613_s_at	207734_at	205731_s_at	203119_at	205264_at	206303_s_at	204402_at	205688_at
205574_x_at	207605_x_at	204703_at	205146_x_at	206374_at	205640_at	204756_at	205879_x_at	205727_at	205780_at	207352_s_at	205950_s_at	204461_x_at	205136_s_at	204968_at	205955_at	204603_at	205354_at	202953_at	205926_at	206874_s_at	207904_s_at	206357_at	203199_s_at	205296_at	206586_at	204555_s_at	205698_s_at
205645_at	207621_s_at	204947_at	205156_s_at	206448_at	205689_at	204769_s_at	206019_at	205731_s_at	206283_s_at	207492_at	206097_at	204555_s_at	205231_s_at	205060_at	206036_s_at	204650_s_at	205355_at	203134_at	206261_at	207069_s_at	208101_s_at	206499_s_at	203201_at	205362_s_at	207105_s_at	204610_s_at	205775_at
205709_s_at	207855_s_at	205333_s_at	205160_at	206516_at	205896_at	204799_at	206132_at	205749_at	206572_x_at	207518_at	206104_at	204615_x_at	205264_at	205061_s_at	206147_x_at	204695_at	205398_s_at	203293_s_at	207707_s_at	207115_x_at	208174_x_at	206848_at	203235_at	205457_at	207505_at	204639_at	205868_s_at
205808_at	207891_s_at	205771_s_at	205211_s_at	206649_s_at	206019_at	205333_s_at	206335_at	205787_x_at	206746_at	208054_at	206214_at	204781_s_at	205317_s_at	205131_x_at	206288_at	204696_s_at	205423_at	203608_at	208094_s_at	207239_s_at	208310_s_at	207824_s_at	203322_at	205762_s_at	207595_s_at	204675_at	206267_s_at
205975_s_at	208067_x_at	205975_s_at	205283_at	206962_x_at	206032_at	205707_at	207425_s_at	206021_at	206858_s_at	208091_s_at	206438_x_at	204825_at	205527_s_at	205284_at	206507_at	204873_at	205676_at	203612_at	208112_x_at	207937_x_at	208430_s_at	208425_s_at	203339_at	205887_x_at	207686_s_at	204805_s_at	206722_s_at
206081_at	208368_s_at	206055_s_at	205284_at	207183_at	206090_s_at	205748_s_at	207495_at	206053_at	206907_at	208216_at	206538_at	205073_at	205771_s_at	205511_at	206590_x_at	204936_at	205706_s_at	203625_x_at	208540_x_at	208158_s_at	208588_at	208541_x_at	203462_x_at	205967_at	207734_at	204824_at	207001_x_at
206429_at	208583_x_at	206180_x_at	205362_s_at	207591_s_at	206132_at	205750_at	207540_s_at	206114_at	207013_s_at	208255_s_at	206645_s_at	205296_at	205910_s_at	205842_s_at	206686_at	204949_at	205775_at	203626_s_at	208651_x_at	208940_at	208879_x_at	208869_s_at	203931_s_at	206044_s_at	207904_s_at	205059_s_at	208114_s_at
206526_at	208762_at	206263_at	205411_at	208588_at	206747_at	205822_s_at	207655_s_at	206182_at	207264_at	208268_at	206708_at	205370_x_at	206101_at	205855_at	206900_x_at	205003_at	205966_at	203821_at	208999_at	208945_s_at	208917_x_at	209262_s_at	203933_at	206169_x_at	208076_at	205223_at	208373_s_at
206667_s_at	208830_s_at	206583_at	205513_at	208860_s_at	206782_s_at	206053_at	207749_s_at	206521_s_at	207540_s_at	208553_at	206807_s_at	205440_s_at	207490_at	206092_x_at	207133_x_at	205004_at	206288_at	203923_s_at	209013_x_at	209005_at	208980_s_at	209534_x_at	204003_s_at	206351_s_at	208478_s_at	205641_s_at	208823_s_at
206847_s_at	208860_s_at	206752_s_at	205685_at	208947_s_at	207020_at	206723_s_at	207871_s_at	207012_at	207727_s_at	208935_s_at	207205_at	205774_at	207594_s_at	206565_x_at	207219_at	205527_s_at	206351_s_at	204089_x_at	209065_at	209117_at	208997_s_at	209611_s_at	204133_at	206565_x_at	208989_s_at	205748_s_at	208906_at
206936_x_at	209110_s_at	206967_at	205756_s_at	209211_at	207159_x_at	206855_s_at	208031_s_at	208478_s_at	208119_s_at	209133_s_at	207273_at	205775_at	207734_at	207088_s_at	207247_s_at	205760_s_at	206662_at	204241_at	209068_at	209149_s_at	209021_x_at	209716_at	204147_s_at	206572_x_at	209158_s_at	205791_x_at	208914_at
207014_at	209131_s_at	207057_at	205774_at	209262_s_at	207309_at	206900_x_at	208063_s_at	208719_s_at	208859_s_at	209235_at	207366_at	205904_at	207746_at	208067_x_at	207283_at	205865_at	207031_at	204379_s_at	209075_s_at	209412_at	209093_s_at	209730_at	204266_s_at	206929_s_at	209171_at	206492_at	208954_s_at
207394_at	209328_x_at	207233_s_at	206081_at	209532_at	208381_s_at	207239_s_at	208119_s_at	208793_x_at	209193_at	209311_at	207426_s_at	205968_at	207759_s_at	208141_s_at	207347_at	206087_x_at	207180_s_at	204998_s_at	209161_at	209534_x_at	209294_x_at	209736_at	204305_at	207608_x_at	209379_s_at	206507_at	209057_x_at
207808_s_at	209512_at	208101_s_at	206095_s_at	209536_s_at	208466_at	207309_at	208306_x_at	208940_at	209204_at	209508_x_at	207591_s_at	206114_at	207919_at	208430_s_at	207439_s_at	207188_at	207495_at	205004_at	209250_at	209648_x_at	209391_at	209878_s_at	204347_at	207730_x_at	209455_at	207601_at	209176_at
208576_s_at	209533_s_at	208151_x_at	206097_at	209561_at	208748_s_at	207400_at	208310_s_at	208960_s_at	209205_s_at	209599_s_at	207665_at	206140_at	208047_s_at	208541_x_at	207559_s_at	207986_x_at	207821_s_at	205034_at	209317_at	209698_at	209407_s_at	209946_at	204383_at	208003_s_at	209518_at	208042_at	209263_x_at
208588_at	209547_s_at	208315_x_at	206288_at	209747_at	208806_at	207782_s_at	208384_s_at	209136_s_at	209501_at	209822_s_at	207803_s_at	206247_at	208701_at	208917_x_at	207761_s_at	208159_x_at	208076_at	205436_s_at	209398_at	209704_at	209424_s_at	210109_at	204426_at	208511_at	209674_at	208328_s_at	209370_s_at
208844_at	209625_at	208373_s_at	206548_at	209782_s_at	209016_s_at	207929_at	208430_s_at	209547_s_at	209518_at	209913_x_at	208216_at	206949_s_at	208935_s_at	209099_x_at	208276_at	208595_s_at	208229_at	205527_s_at	209547_s_at	209898_x_at	209751_s_at	210306_at	204427_s_at	208583_x_at	209726_at	209037_s_at	209381_x_at
209082_s_at	209936_at	208384_s_at	206650_at	210109_at	209571_at	208118_x_at	208844_at	209676_at	209530_at	210158_at	208439_s_at	207267_s_at	209812_x_at	209175_at	208466_at	208712_at	208862_s_at	205744_at	209770_at	210105_s_at	209837_at	210544_s_at	204506_at	208762_at	209733_at	209135_at	209439_s_at
209170_s_at	209941_at	208390_s_at	207183_at	210278_s_at	209651_at	208371_s_at	208987_s_at	209682_at	209538_at	210230_at	208850_s_at	207761_s_at	209892_at	209328_x_at	208831_x_at	208810_at	209321_s_at	206466_at	209773_s_at	210223_s_at	209838_at	210665_at	205136_s_at	209215_at	209751_s_at	209267_s_at	209622_at
209294_x_at	210160_at	208807_s_at	207390_s_at	210457_x_at	209676_at	208490_x_at	209030_s_at	209746_s_at	209563_x_at	210524_x_at	208868_s_at	208050_s_at	210822_at	209478_at	208926_at	208973_at	209378_s_at	206499_s_at	209777_s_at	210361_s_at	209925_at	210693_at	205543_at	209494_s_at	209833_at	209271_at	209665_at
209505_at	210405_x_at	208920_at	208068_x_at	210527_x_at	210021_s_at	208751_at	209157_at	210189_at	209590_at	210611_s_at	209278_s_at	208137_x_at	210985_s_at	209512_at	209152_s_at	209135_at	209425_at	206845_s_at	209808_x_at	210916_s_at	209947_at	210762_s_at	205748_s_at	209527_at	210457_x_at	209827_s_at	209777_s_at
209543_s_at	210567_s_at	209003_at	208373_s_at	210666_at	210694_s_at	208823_s_at	209185_s_at	210220_at	209631_s_at	210693_at	209405_s_at	208647_at	211235_s_at	209595_at	209227_at	209137_s_at	209561_at	207243_s_at	210826_x_at	211168_s_at	209989_at	211573_x_at	205763_s_at	209544_at	210531_at	209832_s_at	210050_at
209818_s_at	210582_s_at	209005_at	208676_s_at	210910_s_at	210845_s_at	209129_at	209204_at	210384_at	209837_at	210791_s_at	209942_x_at	208955_at	211572_s_at	209622_at	209381_x_at	209273_s_at	209625_at	207941_s_at	210871_x_at	211317_s_at	210130_s_at	211599_x_at	205895_s_at	209551_at	210912_x_at	210175_at	210417_s_at
210002_at	210678_s_at	209041_s_at	208804_s_at	210961_s_at	210870_s_at	209275_s_at	209462_at	210612_s_at	210465_s_at	211086_x_at	210174_at	209146_at	211576_s_at	209625_at	209438_at	209321_s_at	209701_at	208006_at	211168_s_at	211370_s_at	210253_at	211668_s_at	205926_at	209910_at	210947_s_at	210220_at	211160_x_at
210186_s_at	210734_x_at	209712_at	209527_at	211012_s_at	210874_s_at	209464_at	210120_s_at	210778_s_at	210476_s_at	211088_s_at	210247_at	209153_s_at	212134_at	209711_at	209463_s_at	209511_at	209826_at	208313_s_at	211535_s_at	211387_x_at	210410_s_at	211809_x_at	206050_s_at	210062_s_at	211233_x_at	210269_s_at	211250_s_at
210469_at	210800_at	209811_at	209532_at	211014_s_at	210935_s_at	209466_x_at	210556_at	210807_s_at	210517_s_at	211105_s_at	210538_s_at	209515_s_at	212157_at	210175_at	209533_s_at	210415_s_at	209833_at	208369_s_at	211584_s_at	211493_x_at	210418_s_at	211862_x_at	206055_s_at	210829_s_at	211444_at	210552_s_at	211982_x_at
210496_at	210916_s_at	209910_at	209567_at	211042_x_at	211097_s_at	209878_s_at	210776_x_at	210808_s_at	211113_s_at	211159_s_at	210600_s_at	209519_at	212182_at	210233_at	209551_at	210625_s_at	209967_s_at	208776_at	211921_x_at	211515_s_at	210633_x_at	211930_at	206067_s_at	211454_x_at	211657_at	210622_x_at	212023_s_at
210612_s_at	211432_s_at	209929_s_at	209667_at	211433_x_at	211139_s_at	210120_s_at	210819_x_at	210822_at	211514_at	211218_at	210812_at	209695_at	212362_at	210415_s_at	209607_x_at	211622_s_at	209996_x_at	208814_at	212382_at	212060_at	210788_s_at	212036_s_at	206092_x_at	211698_at	211781_x_at	210946_at	212087_s_at
210695_s_at	211528_x_at	210005_at	209729_at	211504_x_at	211348_s_at	210276_s_at	211004_s_at	210943_s_at	211596_s_at	211424_x_at	210894_s_at	209726_at	212425_at	210622_x_at	209646_x_at	211713_x_at	210175_at	208885_at	212383_at	212090_at	210807_s_at	212173_at	206499_s_at	212005_at	211833_s_at	212025_s_at	212104_s_at
210778_s_at	212027_at	210320_s_at	210047_at	211538_s_at	211552_s_at	210620_s_at	211426_x_at	211495_x_at	211782_at	211468_s_at	211193_at	209935_at	212649_at	210739_x_at	209920_at	211774_s_at	210358_x_at	208939_at	212424_at	212127_at	210816_s_at	212266_s_at	206936_x_at	212027_at	212103_at	212045_at	212256_at
210940_s_at	212366_at	210582_s_at	210212_x_at	212064_x_at	211573_x_at	210644_s_at	211433_x_at	211580_s_at	212113_at	211732_x_at	211282_x_at	210130_s_at	213007_at	210791_s_at	210249_s_at	212025_s_at	210407_at	208974_x_at	212434_at	212150_at	211019_s_at	212393_at	207391_s_at	212045_at	212286_at	212090_at	212280_x_at
210954_s_at	212450_at	211250_s_at	210499_s_at	212256_at	211673_s_at	210651_s_at	211792_s_at	211668_s_at	212132_at	211781_x_at	211487_x_at	210233_at	213087_s_at	210866_s_at	210299_s_at	212060_at	210539_at	209017_s_at	212608_s_at	212179_at	211073_x_at	212482_at	207515_s_at	212316_at	212303_x_at	212104_s_at	212303_x_at
211456_x_at	212556_at	211444_at	210539_at	212260_at	212077_at	210706_s_at	211907_s_at	211833_s_at	212336_at	211914_x_at	211551_at	210686_x_at	213156_at	210947_s_at	210568_s_at	212088_at	210733_at	209127_s_at	212646_at	212311_at	211088_s_at	212684_at	207622_s_at	212319_at	212452_x_at	212490_at	212332_at
211465_x_at	212858_at	211774_s_at	210793_s_at	212302_at	212170_at	210720_s_at	212047_s_at	212127_at	212338_at	212001_at	211567_at	211200_s_at	213213_at	211235_s_at	210630_s_at	212297_at	210775_x_at	209235_at	212675_s_at	212418_at	211392_s_at	212717_at	207740_s_at	212437_at	212528_at	212497_at	212364_at
212097_at	212924_s_at	212023_s_at	210986_s_at	212390_at	212172_at	211037_s_at	212179_at	212249_at	212533_at	212102_s_at	211865_s_at	211708_s_at	213249_at	211374_x_at	210760_x_at	212318_at	210866_s_at	209321_s_at	212753_at	212431_at	211580_s_at	213221_s_at	208152_s_at	212583_at	212565_at	212778_at	212365_at
212104_s_at	212963_at	212046_x_at	211051_s_at	212450_at	212325_at	211252_x_at	212241_at	212299_at	212570_at	212404_s_at	212157_at	211713_x_at	213250_at	212242_at	210778_s_at	212423_at	211143_x_at	209478_at	212766_s_at	212733_at	212233_at	213280_at	208447_s_at	212739_s_at	212567_s_at	212812_at	212563_at
212241_at	212964_at	212078_s_at	211235_s_at	212494_at	212381_at	211299_s_at	212257_s_at	212443_at	212823_s_at	212948_at	212327_at	211959_at	213409_s_at	212570_at	210849_s_at	212518_at	212134_at	209635_at	212801_at	212772_s_at	212311_at	213426_s_at	208810_at	212786_at	212594_at	213045_at	212627_s_at
212256_at	213180_s_at	212170_at	211576_s_at	212608_s_at	212484_at	211386_at	212509_s_at	212477_at	212942_s_at	212957_s_at	212466_at	212095_s_at	213427_at	212608_s_at	210994_x_at	213206_at	212198_s_at	209916_at	212885_at	212777_at	212431_at	213520_at	208828_at	212808_at	212710_at	213062_at	213052_at
212767_at	213420_at	212236_x_at	212559_at	212780_at	212717_at	211515_s_at	212559_at	212683_at	212984_at	213057_at	212806_at	212142_at	213657_s_at	212645_x_at	211213_at	213244_at	212349_at	209932_s_at	212888_at	212918_at	213057_at	213523_at	208897_s_at	213248_at	212811_x_at	213140_s_at	213055_at
212969_x_at	213470_s_at	212302_at	212674_s_at	212908_at	212759_s_at	211681_s_at	212678_at	212744_at	213233_s_at	213141_at	212923_s_at	212272_at	213720_s_at	213196_at	212000_at	213336_at	212443_at	210054_at	212981_s_at	212934_at	213364_s_at	213577_at	208938_at	213264_at	212849_at	213230_at	213178_s_at
212981_s_at	213552_at	212394_at	212882_at	212913_at	212839_s_at	211793_s_at	212736_at	212760_at	213248_at	213359_at	213004_at	212374_at	213813_x_at	213889_at	212373_at	213578_at	212494_at	210567_s_at	212996_s_at	213118_at	213689_x_at	213672_at	209120_at	213272_s_at	212968_at	213402_at	213303_x_at
213103_at	213629_x_at	212530_at	213075_at	213270_at	212914_at	211799_x_at	212901_s_at	212834_at	213298_at	213552_at	213033_s_at	212523_s_at	213819_s_at	213944_x_at	212642_s_at	213610_s_at	212497_at	210692_s_at	213124_at	213242_x_at	213986_s_at	213724_s_at	209233_at	213297_at	213002_at	213452_at	213615_at
213153_at	213659_at	212638_s_at	213076_at	213341_at	212968_at	212025_s_at	213045_at	213272_s_at	213412_at	213650_at	213048_s_at	212622_at	213877_x_at	214036_at	212930_at	213632_at	212525_s_at	210793_s_at	213188_s_at	213281_at	214190_x_at	213807_x_at	209567_at	213336_at	213115_at	213481_at	213634_s_at
213286_at	213710_s_at	212660_at	213234_at	213473_at	213002_at	212049_at	213069_at	213575_at	213532_at	213728_at	213066_at	212633_at	213891_s_at	214037_s_at	212960_at	213838_at	212598_at	211014_s_at	213331_s_at	213457_at	214266_s_at	213937_s_at	209669_s_at	213344_s_at	213234_at	213587_s_at	213858_at
213323_s_at	213786_at	212751_at	213374_x_at	213669_at	213130_at	212172_at	213475_s_at	213582_at	213658_at	214066_x_at	213106_at	212848_s_at	213893_x_at	214114_x_at	212968_at	213912_at	212705_x_at	211085_s_at	213372_at	213653_at	214310_s_at	214041_x_at	210005_at	213367_at	213236_at	213626_at	214080_x_at
213501_at	214041_x_at	212895_s_at	213460_x_at	213724_s_at	213426_s_at	212438_at	213585_s_at	213585_s_at	213928_s_at	214121_x_at	213252_at	212879_x_at	213907_at	214202_at	213022_s_at	213956_at	212717_at	211136_s_at	213483_at	213761_at	214732_at	214045_at	210008_s_at	213753_x_at	213299_at	213650_at	214322_at
213542_at	214057_at	213119_at	213542_at	213854_at	213433_at	212505_s_at	213804_at	213593_s_at	213954_at	214166_at	213350_at	212927_at	213971_s_at	214733_s_at	213045_at	213989_x_at	212744_at	212037_at	213506_at	213795_s_at	214802_at	214104_at	210338_s_at	214080_x_at	213551_x_at	213739_at	214372_x_at
213913_s_at	214444_s_at	213134_x_at	213553_x_at	214037_s_at	213492_at	212574_x_at	213840_s_at	214116_at	213963_s_at	214251_s_at	213356_x_at	213269_at	213982_s_at	214757_at	213054_at	214080_x_at	212812_at	212139_at	213523_at	213879_at	214813_at	214210_at	210983_s_at	214148_at	213587_s_at	214398_s_at	214760_at
214019_at	214483_s_at	213229_at	213582_at	214230_at	213615_at	212596_s_at	213853_at	214322_at	214229_at	214375_at	213495_s_at	213306_at	214230_at	214791_at	213178_s_at	214202_at	212864_at	212285_s_at	213600_at	213918_s_at	214931_s_at	214298_x_at	211016_x_at	214739_at	213600_at	214707_x_at	214986_x_at
214525_x_at	214590_s_at	213236_at	213632_at	214484_s_at	213649_at	212658_at	213872_at	214481_at	214440_at	214473_x_at	213537_at	213365_at	214592_s_at	214989_x_at	213258_at	214332_s_at	212900_at	212329_at	213720_s_at	214449_s_at	215044_s_at	214340_at	211090_s_at	214742_at	213665_at	214757_at	215043_s_at
214713_at	214943_s_at	213237_at	214230_at	214525_x_at	213686_at	212786_at	214009_at	214537_at	214674_at	214682_at	213588_x_at	213577_at	214651_s_at	215068_s_at	213403_at	214711_at	212902_at	212424_at	213902_at	214726_x_at	215073_s_at	214374_s_at	211681_s_at	214744_s_at	214116_at	214934_at	215383_x_at
214734_at	214975_s_at	213288_at	214241_at	214542_x_at	213728_at	212879_x_at	214152_at	214596_at	214706_at	214791_at	213731_s_at	213610_s_at	214780_s_at	215084_s_at	213444_at	214742_at	212968_at	212430_at	213929_at	214855_s_at	215329_s_at	214537_at	211864_s_at	214753_at	214428_x_at	214960_at	215568_x_at
214763_at	215195_at	213327_s_at	214256_at	214587_at	213935_at	212969_x_at	214176_s_at	214802_at	214792_x_at	214816_x_at	213816_s_at	213786_at	214930_at	215113_s_at	213502_x_at	214780_s_at	213242_x_at	212434_at	214124_x_at	215050_x_at	215507_x_at	214542_x_at	212009_s_at	214802_at	214440_at	215040_at	215684_s_at
214782_at	215600_x_at	213445_at	214260_at	214679_x_at	214000_s_at	213132_s_at	214333_x_at	214807_at	214798_at	215083_at	213826_s_at	213833_x_at	214933_at	215474_at	213527_s_at	214953_s_at	213463_s_at	212489_at	214202_at	215083_at	215581_s_at	214659_x_at	212168_at	215095_at	214790_at	215201_at	215747_s_at
215130_s_at	215855_s_at	213598_at	214375_at	214721_x_at	214008_at	213223_at	214474_at	214965_at	214843_s_at	215159_s_at	213863_s_at	213926_s_at	214982_at	215599_at	213659_at	215084_s_at	213521_at	212656_at	214220_s_at	215545_at	215786_at	214664_at	212446_s_at	215190_at	214807_at	215392_at	216051_x_at
215187_at	215888_at	213657_s_at	214695_at	214726_x_at	214306_at	213295_at	214552_s_at	214986_x_at	214967_at	215206_at	213956_at	213936_x_at	215187_at	215980_s_at	213691_at	215128_at	213542_at	212808_at	214246_x_at	215728_s_at	215954_s_at	214666_x_at	212714_at	215191_at	214843_s_at	215439_x_at	216262_s_at
215231_at	215954_s_at	213685_at	214892_x_at	214731_at	214353_at	213326_at	214684_at	215134_at	214976_at	215310_at	213992_at	213956_at	215218_s_at	216008_s_at	214277_at	215224_at	213793_s_at	212894_at	215096_s_at	216377_x_at	216205_s_at	214874_at	212910_at	215435_at	215024_at	215635_at	216299_s_at
215253_s_at	215992_s_at	213705_at	214934_at	214739_at	214875_x_at	213448_at	214719_at	215175_at	215114_at	215318_at	214001_x_at	214101_s_at	215691_x_at	216282_x_at	214542_x_at	215470_at	213804_at	212948_at	216037_x_at	216383_at	216248_s_at	214878_at	212973_at	215600_x_at	215191_at	215791_at	216323_x_at
215405_at	216038_x_at	213710_s_at	215156_at	214742_at	214902_x_at	213716_s_at	214785_at	215200_x_at	215148_s_at	215336_at	214327_x_at	214117_s_at	215854_at	216305_s_at	214638_s_at	215587_x_at	213844_at	212969_x_at	216615_s_at	217127_at	216348_at	214881_s_at	213262_at	215825_at	215204_at	215836_s_at	216348_at
215595_x_at	216123_x_at	213760_s_at	215213_at	214753_at	215076_s_at	213789_at	214923_at	215412_x_at	215155_at	215374_at	214384_s_at	214220_s_at	216322_at	216702_x_at	214676_x_at	215623_x_at	214666_x_at	213090_s_at	216682_s_at	217436_x_at	216360_x_at	214918_at	213573_at	216153_x_at	215262_at	216054_x_at	216745_x_at
215623_x_at	216399_s_at	213945_s_at	215218_s_at	215031_x_at	215114_at	213833_x_at	215053_at	215505_s_at	215246_at	215385_at	214649_s_at	214221_at	216388_s_at	216823_at	214733_s_at	215631_s_at	214791_at	213229_at	217727_x_at	217796_s_at	216442_x_at	214958_s_at	214314_s_at	216397_s_at	215589_at	216349_at	216822_x_at
215673_at	216422_at	214317_x_at	215519_x_at	215163_at	215116_s_at	213876_x_at	215131_at	215537_x_at	215526_at	215592_at	214694_at	214251_s_at	216531_at	217598_at	214826_at	215907_at	214909_s_at	213264_at	217809_at	218028_at	216459_x_at	214968_at	214355_x_at	216806_at	215608_at	216556_x_at	216971_s_at
215745_at	216933_x_at	214794_at	215597_x_at	215218_s_at	215243_s_at	214148_at	215423_at	215599_at	215825_at	215595_x_at	214893_x_at	214871_x_at	216645_at	217690_at	214895_s_at	215908_at	215483_at	213507_s_at	217905_at	218040_at	216556_x_at	214972_at	214794_at	216971_s_at	215641_at	217226_s_at	217052_x_at
216244_at	216969_s_at	214838_at	215605_at	215224_at	215358_x_at	214383_x_at	215479_at	215640_at	215834_x_at	215670_s_at	214953_s_at	214962_s_at	216698_x_at	217859_s_at	214980_at	215984_s_at	215909_x_at	213523_at	218030_at	218114_at	216823_at	215170_s_at	214882_s_at	217040_x_at	215739_s_at	217353_at	217210_at
216290_x_at	217173_s_at	215333_x_at	216490_x_at	215260_s_at	215373_x_at	214526_x_at	215719_x_at	215757_at	215895_x_at	215764_x_at	215169_at	215093_at	216962_at	217884_at	215057_at	216323_x_at	216153_x_at	213642_at	218147_s_at	218204_s_at	216855_s_at	215206_at	215178_x_at	217329_x_at	215825_at	217645_at	217364_x_at
216377_x_at	217299_s_at	215907_at	216588_at	215484_at	215764_x_at	214549_x_at	215720_s_at	215991_s_at	215983_s_at	215903_s_at	215342_s_at	215204_at	217118_s_at	217920_at	215058_at	216555_at	216511_s_at	213913_s_at	218194_at	218236_s_at	217465_at	215220_s_at	215714_s_at	217541_x_at	215856_at	217737_x_at	217598_at
216479_at	217336_at	216384_x_at	216620_s_at	215589_at	215836_s_at	214733_s_at	216054_x_at	216264_s_at	216604_s_at	216036_x_at	215406_at	215504_x_at	217246_s_at	217921_at	215130_s_at	216804_s_at	216556_x_at	214785_at	218308_at	218352_at	217622_at	215253_s_at	215747_s_at	217667_at	215891_s_at	217991_x_at	217618_x_at
216553_x_at	217604_at	216531_at	216757_at	215775_at	215907_at	214873_at	216381_x_at	216532_x_at	217125_at	216300_x_at	215904_at	215532_x_at	217331_at	217991_x_at	215253_s_at	217141_at	216885_s_at	215030_at	218447_at	218375_at	217731_s_at	215429_s_at	216392_s_at	217673_x_at	216054_x_at	218006_s_at	217662_x_at
217363_x_at	217644_s_at	216593_s_at	216880_at	216071_x_at	215908_at	214953_s_at	216627_s_at	217427_s_at	217393_x_at	216349_at	215999_at	215629_s_at	217426_at	218156_s_at	215287_at	217266_at	216971_s_at	215031_x_at	218568_at	218414_s_at	217732_s_at	215467_x_at	216397_s_at	217693_x_at	216197_at	218010_x_at	217771_at
217600_at	217793_at	217363_x_at	216945_x_at	216222_s_at	215927_at	215032_at	216713_at	217448_s_at	217432_s_at	216389_s_at	216031_x_at	215645_at	217640_x_at	218192_at	215439_x_at	217344_at	217427_s_at	215097_at	218574_s_at	218425_at	217824_at	215481_s_at	216532_x_at	218006_s_at	216300_x_at	218095_s_at	218064_s_at
217776_at	217876_at	217806_s_at	217070_at	216239_at	216061_x_at	215235_at	216883_x_at	217465_at	217878_s_at	216423_at	216090_x_at	215649_s_at	218408_at	218248_at	215544_s_at	217547_x_at	217606_at	215137_at	218580_x_at	218504_at	218120_s_at	215599_at	216952_s_at	218114_at	216349_at	218181_s_at	218110_at
218176_at	218028_at	217887_s_at	217326_x_at	216306_x_at	216101_at	215528_at	216902_s_at	217631_at	217972_at	217456_x_at	216453_at	215765_at	218585_s_at	218278_at	215779_s_at	217598_at	217793_at	215284_at	218633_x_at	218559_s_at	218124_at	215720_s_at	216996_s_at	218147_s_at	216532_x_at	218381_s_at	218112_at
218202_x_at	218128_at	218006_s_at	217469_at	216589_at	216230_x_at	215545_at	216915_s_at	217656_at	217976_s_at	217538_at	216490_x_at	215898_at	218600_at	218393_s_at	215785_s_at	217618_x_at	217924_at	215735_s_at	218703_at	218562_s_at	218128_at	215834_x_at	217027_x_at	218161_s_at	216873_s_at	218398_at	218219_s_at
218225_at	218130_at	218064_s_at	217662_x_at	216606_x_at	216263_s_at	215600_x_at	217379_at	217713_x_at	218228_s_at	217580_x_at	216582_at	216580_at	218808_at	218529_at	215881_x_at	217754_at	218144_s_at	216309_x_at	218735_s_at	218604_at	218178_s_at	215891_s_at	217185_s_at	218174_s_at	217045_x_at	218500_at	218275_at
218656_s_at	218411_s_at	218121_at	218199_s_at	216680_s_at	216284_at	215747_s_at	217508_s_at	217853_at	218267_at	217656_at	216702_x_at	216713_at	218939_at	218579_s_at	215910_s_at	217787_s_at	218240_at	217650_x_at	218750_at	218748_s_at	218282_at	216246_at	217725_x_at	218272_at	217100_s_at	218550_s_at	218453_s_at
218847_at	218476_at	218128_at	218356_at	217368_at	216300_x_at	216205_s_at	217862_at	217929_s_at	218327_s_at	217693_x_at	216847_at	216745_x_at	218962_s_at	218610_s_at	215997_s_at	217808_s_at	218246_at	217724_at	218808_at	218765_at	218302_at	216859_x_at	217754_at	218328_at	217467_at	218572_at	218500_at
219047_s_at	218676_s_at	218425_at	218544_s_at	217393_x_at	217129_at	216239_at	218072_at	217974_at	218410_s_at	218075_at	217056_at	217598_at	218982_s_at	218666_s_at	216115_at	217831_s_at	218276_s_at	217817_at	218988_at	218772_x_at	218516_s_at	216993_s_at	217777_s_at	218441_s_at	217618_x_at	218810_at	218511_s_at
219340_s_at	218685_s_at	218533_s_at	218560_s_at	217585_at	217467_at	216282_x_at	218270_at	218125_s_at	218517_at	218679_s_at	217061_s_at	217662_x_at	218994_s_at	218695_at	216147_at	217866_at	218301_at	217856_at	219002_at	218783_at	218537_at	217205_at	217832_at	218540_at	217838_s_at	218854_at	218695_at
219343_at	218798_at	218658_s_at	218565_at	218199_s_at	217541_x_at	216383_at	218275_at	218210_at	218869_at	218752_at	217230_at	217862_at	219078_at	218710_at	216882_s_at	217916_s_at	218494_s_at	217857_s_at	219076_s_at	218812_s_at	218759_at	217309_s_at	217850_at	218590_at	217891_at	218894_s_at	218702_at
219453_at	218808_at	218875_s_at	218939_at	218255_s_at	217542_at	216387_x_at	218378_s_at	218228_s_at	219050_s_at	218964_at	217247_at	218128_at	219114_at	218896_s_at	217205_at	218064_s_at	218578_at	217987_at	219145_at	218877_s_at	218854_at	217427_s_at	217851_s_at	218639_s_at	218389_s_at	218968_s_at	218756_s_at
219473_at	218958_at	218904_s_at	219068_x_at	218632_at	217556_at	216806_at	218489_s_at	218234_at	219186_at	219026_s_at	217392_at	218450_at	219233_s_at	218944_at	217253_at	218308_at	218579_s_at	218077_s_at	219161_s_at	218916_at	218911_at	217502_at	217884_at	218783_at	218619_s_at	219018_s_at	218762_at
219512_at	219021_at	218977_s_at	219071_x_at	218793_s_at	217632_at	216971_s_at	218510_x_at	218284_at	219223_at	219063_at	217507_at	218510_x_at	219252_s_at	219066_at	217461_x_at	218393_s_at	218613_at	218131_s_at	219166_at	218923_at	218977_s_at	217534_at	218096_at	219028_at	218665_at	219094_at	218861_at
219637_at	219024_at	219016_at	219208_at	218833_at	217767_at	217619_x_at	218532_s_at	218402_s_at	219291_at	219241_x_at	217630_at	218785_s_at	219428_s_at	219071_x_at	217547_x_at	218475_at	218688_at	218153_at	219192_at	219295_s_at	219326_s_at	217543_s_at	218153_at	219086_at	218674_at	219289_at	218869_at
219661_at	219177_at	219063_at	219238_at	218895_at	217880_at	217891_at	218812_s_at	218430_s_at	219297_at	219252_s_at	219026_s_at	218994_s_at	219497_s_at	219149_x_at	217602_at	218605_at	218935_at	218161_s_at	219228_at	219446_at	219376_at	217608_at	218156_s_at	219169_s_at	218951_s_at	219510_at	218897_at
219674_s_at	219202_at	219177_at	219328_at	219131_at	218012_at	218051_s_at	219012_s_at	218588_s_at	219395_at	219261_at	219222_at	219056_at	219828_at	219151_s_at	217644_s_at	218609_s_at	219021_at	218187_s_at	219286_s_at	219583_s_at	219399_at	217681_at	218199_s_at	219174_at	219024_at	219513_s_at	219019_at
219749_at	219317_at	219224_x_at	219510_at	219262_at	218647_s_at	218225_at	219377_at	218787_x_at	219489_s_at	219294_at	219579_at	219138_at	220016_at	219156_at	217703_x_at	218670_at	219084_at	218266_s_at	219406_at	219631_at	219418_at	217690_at	218238_at	219209_at	219051_x_at	219968_at	219088_s_at
219838_at	219340_s_at	219226_at	219650_at	219690_at	218810_at	218441_s_at	219398_at	219163_at	219753_at	219624_at	219642_s_at	219208_at	220088_at	219333_s_at	217735_s_at	218724_s_at	219211_at	218275_at	219513_s_at	219696_at	219435_at	217862_at	218239_s_at	219482_at	219056_at	219982_s_at	219120_at
219874_at	219451_at	219237_s_at	219713_at	219760_at	218879_s_at	218504_at	219419_at	219341_at	219978_s_at	219753_at	219842_at	219216_at	220165_at	219486_at	218024_at	218776_s_at	219368_at	218447_at	219678_x_at	219917_at	219444_at	218400_at	218284_at	219486_at	219180_s_at	219986_s_at	219328_at
219951_s_at	219917_at	219258_at	220042_x_at	219792_at	219098_at	218601_at	219608_s_at	219484_at	220097_s_at	219968_at	219977_at	219244_s_at	220210_at	219590_x_at	218264_at	218861_at	219409_at	218568_at	219931_s_at	220171_x_at	219469_at	218800_at	218340_s_at	219664_s_at	219289_at	220288_at	219398_at
220232_at	219953_s_at	219320_at	220494_s_at	219805_at	219154_at	218743_at	219886_at	219504_s_at	220128_s_at	219980_at	220032_at	219294_at	220243_at	219661_at	218279_s_at	219000_s_at	219472_at	218572_at	220007_at	220212_s_at	219538_at	219141_s_at	218427_at	219688_at	219320_at	220391_at	219486_at
220703_at	220018_at	219361_s_at	220500_s_at	219831_at	219182_at	218774_at	219904_at	219625_s_at	220198_s_at	220335_x_at	220197_at	219401_at	220319_s_at	219713_at	218453_s_at	219143_s_at	219583_s_at	218590_at	220078_at	220305_at	219590_x_at	219165_at	218481_at	219951_s_at	219760_at	220855_at	219627_at
220771_at	220033_at	219378_at	220762_s_at	219915_s_at	219208_at	218869_at	220137_at	219663_s_at	220338_at	220349_s_at	220210_at	219448_at	220346_at	219842_at	218490_s_at	219448_at	219683_at	218664_at	220121_at	220926_s_at	219758_at	219608_s_at	218544_s_at	219953_s_at	219886_at	220943_s_at	219673_at
220797_at	220215_at	219419_at	220870_at	220050_at	219261_at	219070_s_at	220223_at	219674_s_at	220352_x_at	220696_at	220275_at	219990_at	220608_s_at	219881_s_at	218524_at	219486_at	219753_at	218710_at	220264_s_at	220988_s_at	219774_at	219708_at	218605_at	220007_at	220048_at	220945_x_at	219680_at
220828_s_at	220242_x_at	219627_at	221005_s_at	220150_s_at	219427_at	219111_s_at	220374_at	219951_s_at	220671_at	220712_at	220468_at	220171_x_at	220890_s_at	219913_s_at	218808_at	219861_at	219838_at	218735_s_at	220352_x_at	220992_s_at	219784_at	220091_at	218767_at	220954_s_at	220250_at	221098_x_at	219690_at
220945_x_at	220255_at	219774_at	221044_s_at	220221_at	219906_at	219165_at	220452_x_at	220033_at	220905_at	220728_at	220592_at	220255_at	220951_s_at	220073_s_at	218985_at	219980_at	219986_s_at	218743_at	220647_s_at	221135_s_at	219797_at	220092_s_at	218798_at	221079_s_at	220668_s_at	221482_s_at	219846_at
220955_x_at	220760_x_at	219951_s_at	221135_s_at	220618_s_at	220042_x_at	219207_at	220482_s_at	220091_at	220915_s_at	220729_at	220623_s_at	220945_x_at	221139_s_at	220155_s_at	219164_s_at	220028_at	220173_at	218889_at	220795_s_at	221686_s_at	219868_s_at	220341_s_at	218859_s_at	221219_s_at	220947_s_at	221540_x_at	220078_at
221043_at	220855_at	219956_at	221188_s_at	220632_s_at	220201_at	219551_at	220558_x_at	220103_s_at	220977_x_at	220753_s_at	220826_at	221014_s_at	221308_at	220176_at	219705_at	220063_at	220238_s_at	218926_at	221274_s_at	221834_at	219874_at	220658_s_at	218866_s_at	221498_at	220987_s_at	221564_at	220181_x_at
221224_s_at	220986_s_at	220007_at	221332_at	220659_s_at	220589_s_at	219838_at	220774_at	220395_at	221049_s_at	221050_s_at	220877_at	221045_s_at	221521_s_at	220241_at	219846_at	220160_s_at	220241_at	219050_s_at	221481_x_at	221883_at	220195_at	220760_x_at	218877_s_at	221560_at	221043_at	221594_at	220466_at
221244_s_at	221036_s_at	220458_at	221629_x_at	221071_at	220998_s_at	220236_at	220874_at	220572_at	221247_s_at	221224_s_at	220907_at	221244_s_at	221747_at	220386_s_at	220143_x_at	220417_s_at	220387_s_at	219152_at	221536_s_at	221919_at	220240_s_at	220973_s_at	218886_at	221616_s_at	221561_at	221683_s_at	220587_s_at
221260_s_at	221048_x_at	220671_at	221653_x_at	221592_at	221044_s_at	220840_s_at	221012_s_at	220969_s_at	221810_at	221523_s_at	221057_at	221649_s_at	221904_at	220526_s_at	220181_x_at	220855_at	220576_at	219200_at	221538_s_at	221940_at	220610_s_at	221043_at	219006_at	221740_x_at	221582_at	221879_at	220874_at
221268_s_at	221176_x_at	220856_x_at	221785_at	221594_at	221065_s_at	221563_at	221079_s_at	220988_s_at	221838_at	221551_x_at	221077_at	221750_at	221925_s_at	220688_s_at	220408_x_at	221056_x_at	220659_s_at	219226_at	221540_x_at	221941_at	220720_x_at	221063_x_at	219110_at	221794_at	221629_x_at	221972_s_at	221187_s_at
221564_at	221222_s_at	220998_s_at	221879_at	221656_s_at	221217_s_at	221647_s_at	221332_at	221155_x_at	221892_at	221617_at	221221_s_at	221869_at	222047_s_at	220800_s_at	220844_at	221155_x_at	220682_s_at	219408_at	221645_s_at	221953_s_at	220987_s_at	221560_at	219158_s_at	221812_at	221710_x_at	222037_at	221222_s_at
221679_s_at	221251_x_at	221561_at	221941_at	221707_s_at	221272_s_at	221701_s_at	221350_at	221556_at	222024_s_at	221707_s_at	221332_at	221922_at	222052_at	221079_s_at	221748_s_at	221549_at	220773_s_at	220085_at	221732_at	222165_x_at	221036_s_at	221565_s_at	219198_at	221846_s_at	221744_at	222228_s_at	221247_s_at
221785_at	221265_s_at	221940_at	222032_s_at	221840_at	221508_at	221706_s_at	221511_x_at	221616_s_at	222164_at	221840_at	221334_s_at	221997_s_at	222056_s_at	221187_s_at	221794_at	221601_s_at	220788_s_at	220087_at	221767_x_at	222273_at	221039_s_at	221583_s_at	219819_s_at	221888_at	221849_s_at	32069_at	221549_at
221790_s_at	221600_s_at	221972_s_at	222044_at	221880_s_at	221679_s_at	221737_at	221551_x_at	221673_s_at	222228_s_at	221856_s_at	221633_at	222006_at	222113_s_at	221270_s_at	221928_at	221764_at	220962_s_at	220097_s_at	221825_at	222371_at	221222_s_at	221917_s_at	219988_s_at	221925_s_at	222121_at	33736_at	221587_s_at
221868_at	221656_s_at	222120_at	222113_s_at	222105_s_at	221883_at	221759_at	221656_s_at	221769_at	33323_r_at	221897_at	221691_x_at	222027_at	222248_s_at	221727_at	221953_s_at	222041_at	221703_at	221247_s_at	221845_s_at	243_g_at	221306_at	221939_at	220175_s_at	221987_s_at	222175_s_at	36019_at	222109_at
221883_at	221772_s_at	31637_s_at	32032_at	222109_at	222014_x_at	221920_s_at	221881_s_at	221784_at	35179_at	221961_at	221856_s_at	222269_at	222270_at	221819_at	222030_at	222109_at	221964_at	221536_s_at	221970_s_at	32259_at	221785_at	222013_x_at	220178_at	222294_s_at	222252_x_at	37793_r_at	222147_s_at
221960_s_at	221920_s_at	37424_at	32062_at	222245_s_at	222062_at	221953_s_at	222032_s_at	221838_at	37831_at	222094_at	221867_at	222312_s_at	222310_at	221987_s_at	222149_x_at	222113_s_at	221982_x_at	221727_at	222305_at	36545_s_at	222093_s_at	222130_s_at	220547_s_at	32088_at	222273_at	39891_at	222151_s_at
222129_at	222164_at	37577_at	33736_at	222320_at	222155_s_at	222175_s_at	222214_at	222027_at	40524_at	222254_at	222041_at	32062_at	34764_at	222037_at	222224_at	222131_x_at	221988_at	221845_s_at	31874_at	37254_at	222099_s_at	222152_at	220688_s_at	35666_at	222304_x_at	47083_at	222221_x_at
222279_at	222309_at	41512_at	37384_at	222343_at	222222_s_at	31637_s_at	222339_x_at	222094_at	40612_at	222317_at	222096_x_at	32723_at	36030_at	222104_x_at	222254_at	222163_s_at	222011_s_at	221856_s_at	35160_at	37424_at	222192_s_at	222204_s_at	220789_s_at	36865_at	36564_at	48825_at	222222_s_at
32091_at	34689_at	41657_at	44120_at	37425_g_at	222236_s_at	37028_at	37079_at	222180_at	56919_at	222376_at	222101_s_at	34726_at	41512_at	222132_s_at	36612_at	222310_at	222245_s_at	222006_at	35666_at	39835_at	222304_x_at	222311_s_at	221510_s_at	38447_at	36907_at	53071_s_at	37408_at
42361_g_at	34726_at	48117_at	44702_at	39854_r_at	222290_at	41858_at	41856_at	222214_at	59705_at	34726_at	222112_at	36612_at	44120_at	34260_at	39854_r_at	222366_at	222309_at	35179_at	35685_at	46665_at	40640_at	37254_at	221693_s_at	47069_at	396_f_at	55081_at	48030_i_at
48030_i_at	41657_at	48659_at	45653_at	53987_at	49329_at	55616_at	43934_at	222252_x_at	61874_at	37424_at	222187_x_at	37590_g_at	58780_s_at	36830_at	52731_at	32091_at	31637_s_at	35666_at	36475_at	55065_at	48612_at	48030_i_at	221861_at	48659_at	59705_at	64064_at	54051_at
55081_at	564_at	63825_at	47105_at	632_at	49452_at	57539_at	57739_at	34858_at	64418_at	55616_at	222277_at	52285_f_at	60471_at	39854_r_at	58900_at	64408_s_at	36888_at	47083_at	40420_at	55093_at	58900_at	71933_at	221970_s_at	55662_at	64064_at	65630_at	91703_at
59644_at	90610_at	78383_at	91826_at	64440_at	635_s_at	59433_at	60794_f_at	66053_at	AFFX-BioDn-3_at	60471_at	32029_at	59644_at	65718_at	53202_at	78383_at	91684_g_at	91816_f_at	52078_at	57540_at	57516_at	91682_at	AFFX-HUMISGF3A/M97935_5_at	221987_s_at	60815_at	65635_at	78495_at	AFFX-r2-Ec-bioB-5_at

## Sheet: B
The signatures (Probe IDs) with 500 length about 28 drugs.
Gabapentin	Flunarizine	Amoxapine	Metixene	Ergocalciferol	Paroxetine	Naltrexone	Methyldopa	Levonorgestrel	Metformin	Bethanechol	Benzocaine	Felodipine	Zuclopenthixol	Nortriptyline	Aminophylline	Clomifene	Aminocaproic Acid	Fluphenazine	Haloperidol	Bupropion	Disopyramide	Captopril	Bromocriptine	Imipramine	Prednisolone	Ketoprofen	Prochlorperazine
200935_at	200933_x_at	200756_x_at	200066_at	179_at	200930_s_at	200071_at	200836_s_at	1294_at	1598_g_at	1431_at	200035_at	200628_s_at	200643_at	200755_s_at	200857_s_at	1007_s_at	177_at	200672_x_at	200053_at	200649_at	200054_at	200704_at	200677_at	1316_at	200648_s_at	160020_at	200701_at
201187_s_at	201090_x_at	200831_s_at	200756_x_at	200070_at	201211_s_at	200595_s_at	201329_s_at	200670_at	179_at	1494_f_at	200737_at	200707_at	200831_s_at	200835_s_at	201109_s_at	200742_s_at	201421_s_at	200701_at	200598_s_at	200824_at	200688_at	200861_at	200700_s_at	200598_s_at	200878_at	200672_x_at	200731_s_at
201213_at	201117_s_at	201055_s_at	200831_s_at	200628_s_at	201355_s_at	200603_at	201428_at	201195_s_at	200687_s_at	200852_x_at	200793_s_at	200779_at	200907_s_at	200999_s_at	201355_s_at	200870_at	201442_s_at	200832_s_at	200604_s_at	200861_at	200835_s_at	201513_at	200748_s_at	200757_s_at	200905_x_at	201269_s_at	200831_s_at
201354_s_at	201218_at	201230_s_at	200898_s_at	200789_at	201374_x_at	200605_s_at	201655_s_at	201269_s_at	200759_x_at	200928_s_at	200795_at	200808_s_at	200935_at	201243_s_at	201367_s_at	201228_s_at	201557_at	200890_s_at	200628_s_at	201117_s_at	201059_at	201641_at	200885_at	200950_at	201024_x_at	201638_s_at	200864_s_at
201519_at	201256_at	201790_s_at	200985_s_at	200959_at	201627_s_at	200639_s_at	202208_s_at	201638_s_at	201073_s_at	200959_at	200831_s_at	200920_s_at	200998_s_at	201557_at	201388_at	201243_s_at	202005_at	201048_x_at	200724_at	201124_at	201075_s_at	201642_at	201057_s_at	200999_s_at	201041_s_at	201856_s_at	200897_s_at
201836_s_at	201308_s_at	201909_at	201127_s_at	201003_x_at	201785_at	200706_s_at	202287_s_at	201865_x_at	201087_at	201055_s_at	200935_at	200921_s_at	201167_x_at	201601_x_at	201766_at	201266_at	202030_at	201127_s_at	200742_s_at	201314_at	201155_s_at	201843_s_at	201141_at	201096_s_at	201087_at	201929_s_at	200900_s_at
201837_s_at	201446_s_at	202037_s_at	201169_s_at	201053_s_at	202287_s_at	200762_at	202952_s_at	201925_s_at	201158_at	201139_s_at	200974_at	201044_x_at	201275_at	201625_s_at	201818_at	201332_s_at	202103_at	201170_s_at	200779_at	201372_s_at	201206_s_at	201894_s_at	201358_s_at	201116_s_at	201110_s_at	201998_at	200969_at
201979_s_at	201460_at	202248_at	201193_at	201106_at	202517_at	200821_at	203089_s_at	202499_s_at	201341_at	201204_s_at	201168_x_at	201397_at	201283_s_at	201626_at	201826_s_at	201464_x_at	202205_at	201205_at	200794_x_at	201622_at	201329_s_at	201916_s_at	201425_at	201176_s_at	201159_s_at	202040_s_at	200989_at
202044_at	201481_s_at	202287_s_at	201354_s_at	201120_s_at	202563_at	200833_s_at	203114_at	202665_s_at	201388_at	201332_s_at	201169_s_at	201464_x_at	201329_s_at	201627_s_at	201879_at	201556_s_at	202476_s_at	201247_at	200831_s_at	201802_at	201369_s_at	202175_at	201468_s_at	201240_s_at	201175_at	202106_at	201133_s_at
202072_at	201622_at	202368_s_at	201404_x_at	201192_s_at	203170_at	200961_at	203129_s_at	202831_at	201389_at	201369_s_at	201282_at	201531_at	201465_s_at	201790_s_at	202339_at	201625_s_at	202674_s_at	201301_s_at	200905_x_at	201826_s_at	201715_s_at	202254_at	201531_at	201324_at	201230_s_at	202248_at	201193_at
202367_at	201715_s_at	202492_at	201473_at	201222_s_at	203368_at	200970_s_at	203285_s_at	202842_s_at	201475_x_at	201624_at	201284_s_at	201794_s_at	201474_s_at	201791_s_at	202452_at	201926_s_at	2028_s_at	201403_s_at	200924_s_at	201984_s_at	201731_s_at	202400_s_at	201590_x_at	201399_s_at	201367_s_at	202473_x_at	201313_at
202445_s_at	201763_s_at	202531_at	201627_s_at	201239_s_at	203398_s_at	201092_at	203307_at	202851_at	201484_at	201644_at	201294_s_at	202046_s_at	201506_at	201798_s_at	202517_at	202045_s_at	203407_at	201625_s_at	201048_x_at	202082_s_at	201783_s_at	202422_s_at	201785_at	201483_s_at	201481_s_at	202488_s_at	201329_s_at
202478_at	201806_s_at	202604_x_at	201790_s_at	201295_s_at	203416_at	201121_s_at	203495_at	202887_s_at	201776_s_at	201655_s_at	201315_x_at	202236_s_at	201626_at	201958_s_at	202586_at	202181_at	203464_s_at	201626_at	201104_x_at	202083_s_at	201793_x_at	202490_at	201868_s_at	201560_at	201510_at	202516_s_at	201444_s_at
202482_x_at	202008_s_at	202672_s_at	201971_s_at	201300_s_at	203471_s_at	201304_at	203570_at	202888_s_at	201790_s_at	201741_x_at	201401_s_at	202402_s_at	201766_at	202067_s_at	202994_s_at	202260_s_at	203503_s_at	201627_s_at	201118_at	202273_at	201902_s_at	202505_at	201885_s_at	201567_s_at	201747_s_at	202730_s_at	201464_x_at
202528_at	202064_s_at	202719_s_at	202033_s_at	201319_at	203626_s_at	201330_at	203932_at	202928_s_at	201800_s_at	201868_s_at	201531_at	202455_at	201791_s_at	202068_s_at	203009_at	202307_s_at	203638_s_at	201734_at	201216_at	202307_s_at	201957_at	202517_at	202083_s_at	201759_at	201777_s_at	202840_at	201540_at
202637_s_at	202103_at	203309_s_at	202073_at	201483_s_at	203887_s_at	201375_s_at	203937_s_at	203144_s_at	201804_x_at	201915_at	201613_s_at	202482_x_at	201975_at	202245_at	203244_at	202865_at	203796_s_at	202067_s_at	201275_at	202358_s_at	202072_at	202620_s_at	202439_s_at	201832_s_at	201850_at	202938_x_at	201560_at
202764_at	202217_at	203348_s_at	202218_s_at	201507_at	203949_at	201407_s_at	203965_at	203191_at	201819_at	202032_s_at	201618_x_at	202510_s_at	202039_at	202314_at	203268_s_at	202902_s_at	203866_at	202068_s_at	201364_s_at	202431_s_at	202123_s_at	202674_s_at	202509_s_at	201965_s_at	201869_s_at	202991_at	201625_s_at
202817_s_at	202220_at	203492_x_at	202335_s_at	201677_at	204077_x_at	201560_at	204182_s_at	203233_at	201848_s_at	202183_s_at	201640_x_at	202583_s_at	202074_s_at	202375_at	203419_at	202931_x_at	203952_at	202083_s_at	201365_at	202448_s_at	202187_s_at	202700_s_at	202686_s_at	201984_s_at	201903_at	203051_at	201681_s_at
202893_at	202342_s_at	203518_at	202539_s_at	201683_x_at	204265_s_at	201706_s_at	204281_at	203308_x_at	201932_at	202254_at	201755_at	202665_s_at	202150_s_at	202459_s_at	203666_at	203056_s_at	204073_s_at	202162_s_at	201399_s_at	202504_at	202208_s_at	202903_at	202769_at	202006_at	202208_s_at	203220_s_at	201780_s_at
202896_s_at	202584_at	203794_at	202547_s_at	201691_s_at	204271_s_at	201733_at	204415_at	203527_s_at	201961_s_at	202332_at	201790_s_at	202672_s_at	202245_at	202490_at	203757_s_at	203097_s_at	204129_at	202172_at	201471_s_at	202510_s_at	202328_s_at	202907_s_at	202795_x_at	202103_at	202263_at	203264_s_at	201790_s_at
202914_s_at	202627_s_at	204249_s_at	202558_s_at	201695_s_at	204358_s_at	201811_x_at	204560_at	203638_s_at	202045_s_at	202455_at	201797_s_at	202887_s_at	202310_s_at	202517_at	203891_s_at	203139_at	204195_s_at	202211_at	201476_s_at	202662_s_at	202486_at	202959_at	203047_at	202211_at	202334_s_at	203410_at	201963_at
203029_s_at	202716_at	204294_at	202604_x_at	201925_s_at	204378_at	201816_s_at	204600_at	204041_at	202049_s_at	202675_at	202145_at	202889_x_at	202342_s_at	202539_s_at	203958_s_at	203153_at	204374_s_at	202314_at	201626_at	202750_s_at	202545_at	203078_at	203050_at	202341_s_at	202366_at	203419_at	202034_x_at
203043_at	203102_s_at	204326_x_at	202662_s_at	201977_s_at	204416_x_at	201829_at	204661_at	204063_s_at	202063_s_at	202692_s_at	202210_x_at	202928_s_at	202344_at	202540_s_at	204060_s_at	203308_x_at	204379_s_at	202375_at	201631_s_at	202834_at	202624_s_at	203295_s_at	203097_s_at	202375_at	202367_at	203443_at	202072_at
203128_at	203106_s_at	204334_at	202730_s_at	202252_at	204621_s_at	201845_s_at	204680_s_at	204298_s_at	202104_s_at	202937_x_at	202247_s_at	203003_at	202398_at	202644_s_at	204144_s_at	203368_at	204691_x_at	202419_at	201637_s_at	203198_at	202630_at	203381_s_at	203140_at	202562_s_at	202417_at	203456_at	202129_s_at
203243_s_at	203127_s_at	204358_s_at	202793_at	202257_s_at	204626_s_at	201889_at	204682_at	204357_s_at	202226_s_at	203061_s_at	202249_s_at	203199_s_at	202455_at	202667_s_at	204189_at	203389_at	204799_at	202479_s_at	201688_s_at	203205_at	202660_at	203447_at	203252_at	202588_at	202471_s_at	203756_at	202131_s_at
203248_at	203155_at	204377_s_at	202816_s_at	202275_at	204660_at	201921_at	204693_at	204416_x_at	202313_at	203072_at	202308_at	203231_s_at	202479_s_at	202679_at	204308_s_at	203602_s_at	204974_at	202488_s_at	201790_s_at	203592_s_at	202808_at	203516_at	203278_s_at	202672_s_at	202525_at	203904_x_at	202164_s_at
203464_s_at	203368_at	204564_at	202928_s_at	202546_at	204681_s_at	201925_s_at	204856_at	204564_at	202368_s_at	203115_at	202315_s_at	203234_at	202510_s_at	202769_at	204337_at	203827_at	204993_at	202553_s_at	201791_s_at	203604_at	202860_at	203521_s_at	203335_at	202710_at	202549_at	204138_s_at	202172_at
203540_at	203373_at	204575_s_at	203369_x_at	202556_s_at	204815_s_at	201971_s_at	204991_s_at	204595_s_at	202369_s_at	203171_s_at	202426_s_at	203248_at	202540_s_at	202770_s_at	204637_at	203882_at	205014_at	202562_s_at	201871_s_at	203618_at	202894_at	203528_at	203430_at	202721_s_at	202580_x_at	204325_s_at	202174_s_at
203665_at	203407_at	204615_x_at	203389_at	202585_s_at	204960_at	201972_at	205002_at	204644_at	202407_s_at	203206_at	202452_at	203349_s_at	202718_at	202842_s_at	204665_at	203901_at	205021_s_at	202644_s_at	201897_s_at	203981_s_at	202956_at	203604_at	203450_at	202722_s_at	202588_at	204483_at	202195_s_at
203731_s_at	203419_at	204685_s_at	203676_at	202660_at	205228_at	202052_s_at	205065_at	204698_at	202494_at	203223_at	202463_s_at	203665_at	202734_at	202869_at	204696_s_at	203911_at	205059_s_at	202731_at	201940_at	204081_at	203239_s_at	203654_s_at	203473_at	202837_at	202590_s_at	204535_s_at	202211_at
203831_at	203451_at	204704_s_at	203706_s_at	202782_s_at	205305_at	202120_x_at	205088_at	204834_at	202835_at	203377_s_at	202519_at	203770_s_at	202842_s_at	202914_s_at	204734_at	203981_s_at	205073_at	202764_at	202067_s_at	204151_x_at	203299_s_at	203661_s_at	203507_at	202962_at	202668_at	204536_s_at	202245_at
204132_s_at	203657_s_at	204745_x_at	203731_s_at	202814_s_at	205402_x_at	202160_at	205093_at	204923_at	202891_at	203584_at	202769_at	203827_at	202843_at	202996_at	204777_s_at	204271_s_at	205121_at	202842_s_at	202068_s_at	204169_at	203370_s_at	203763_at	203514_at	202995_s_at	202795_x_at	204684_at	202304_at
204150_at	203737_s_at	204777_s_at	203811_s_at	202841_x_at	205425_at	202197_at	205104_at	204991_s_at	202991_at	203711_s_at	202771_at	203844_at	202928_s_at	203027_s_at	204785_x_at	204326_x_at	205141_at	203010_at	202083_s_at	204303_s_at	203386_at	203782_s_at	203522_at	203108_at	202798_at	204776_at	202334_s_at
204352_at	203768_s_at	204879_at	204014_at	202869_at	205438_at	202207_at	205333_s_at	205049_s_at	203055_s_at	203793_x_at	202801_at	203872_at	203058_s_at	203234_at	204864_s_at	204381_at	205144_at	203158_s_at	202316_x_at	204327_s_at	203464_s_at	203864_s_at	203640_at	203115_at	202991_at	205018_s_at	202375_at
204415_at	203828_s_at	204987_at	204272_at	202873_at	205472_s_at	202265_at	205424_at	205249_at	203127_s_at	203933_at	202807_s_at	203932_at	203128_at	203369_x_at	204893_s_at	204568_at	205182_s_at	203242_s_at	202348_s_at	204346_s_at	203479_s_at	203898_at	203695_s_at	203130_s_at	202993_at	205265_s_at	202459_s_at
204509_at	203860_at	205049_s_at	204334_at	202917_s_at	205508_at	202303_x_at	205434_s_at	205250_s_at	203149_at	204038_s_at	202993_at	204081_at	203141_s_at	203389_at	204929_s_at	204615_x_at	205183_at	203265_s_at	202501_at	204415_at	203718_at	204061_at	203708_at	203288_at	203108_at	205458_at	202539_s_at
204525_at	203910_at	205096_at	204410_at	202918_s_at	205657_at	202349_at	205448_s_at	205296_at	203205_at	204042_at	203047_at	204230_s_at	203143_s_at	203390_s_at	204967_at	204757_s_at	205271_s_at	203343_at	202539_s_at	204463_s_at	203737_s_at	204168_at	203796_s_at	203402_at	203140_at	205481_at	202540_s_at
204567_s_at	203977_at	205146_x_at	204426_at	202948_at	205685_at	202388_at	205471_s_at	205392_s_at	203210_s_at	204080_at	203118_at	204286_s_at	203198_at	203445_s_at	205100_at	204893_s_at	205279_s_at	203346_s_at	202562_s_at	204494_s_at	203759_at	204208_at	203853_s_at	203706_s_at	203194_s_at	205580_s_at	202558_s_at
204632_at	204099_at	205150_s_at	204532_x_at	202949_s_at	205791_x_at	202451_at	205640_at	205473_at	203226_s_at	204169_at	203183_s_at	204326_x_at	203220_s_at	203751_x_at	205188_s_at	204979_s_at	205307_s_at	203665_at	202595_s_at	204535_s_at	203806_s_at	204213_at	203865_s_at	203725_at	203201_at	205606_at	202565_s_at
204660_at	204123_at	205156_s_at	204569_at	203124_s_at	205829_at	202502_at	205737_at	205654_at	203273_s_at	204183_s_at	203402_at	204436_at	203288_at	203752_s_at	205211_s_at	204986_s_at	205333_s_at	203752_s_at	202727_s_at	204549_at	203836_s_at	204498_s_at	204034_at	203768_s_at	203268_s_at	205616_at	202603_at
204777_s_at	204253_s_at	205167_s_at	204657_s_at	203228_at	205908_s_at	202506_at	205784_x_at	205679_x_at	203402_at	204248_at	203419_at	204495_s_at	203313_s_at	203809_s_at	205277_at	205072_s_at	205432_at	204096_s_at	202821_s_at	204702_s_at	203943_at	204519_s_at	204090_at	203827_at	203294_s_at	205679_x_at	202667_s_at
204842_x_at	204285_s_at	205230_at	204866_at	203643_at	205930_at	202535_at	205926_at	205681_at	203528_at	204269_at	203628_at	204546_at	203330_s_at	203823_at	205440_s_at	205076_s_at	205780_at	204221_x_at	202842_s_at	204878_s_at	203976_s_at	204522_at	204159_at	203846_at	203379_at	205783_at	202719_s_at
205085_at	204294_at	205392_s_at	205018_s_at	203746_s_at	205953_at	202600_s_at	205976_at	205688_at	203701_s_at	204308_s_at	203668_at	204747_at	203526_s_at	203827_at	205586_x_at	205103_at	205931_s_at	204237_at	202867_s_at	205021_s_at	204009_s_at	204550_x_at	204198_s_at	204180_s_at	203437_at	205877_s_at	202721_s_at
205144_at	204337_at	205409_at	205107_s_at	203771_s_at	205967_at	202607_at	206004_at	205713_s_at	203907_s_at	204355_at	203751_x_at	204864_s_at	203640_at	203958_s_at	205700_at	205159_at	205950_s_at	204272_at	202887_s_at	205109_s_at	204016_at	204568_at	204239_s_at	204200_s_at	203542_s_at	205900_at	202722_s_at
205157_s_at	204501_at	205490_x_at	205141_at	203805_s_at	206002_at	202631_s_at	206117_at	205724_at	203953_s_at	204421_s_at	204047_s_at	204919_at	203853_s_at	203981_s_at	205707_at	205203_at	206160_at	204317_at	202929_s_at	205201_at	204077_x_at	204781_s_at	204253_s_at	204224_s_at	203556_at	205950_s_at	202731_at
205223_at	204577_s_at	205765_at	205233_s_at	203810_at	206060_s_at	202680_at	206160_at	205838_at	203959_s_at	204518_s_at	204081_at	204979_s_at	203950_s_at	204132_s_at	205736_at	205212_s_at	206239_s_at	204423_at	203100_s_at	205209_at	204155_s_at	204836_at	204351_at	204269_at	203638_s_at	206123_at	202733_at
205343_at	204590_x_at	205838_at	205239_at	204014_at	206155_at	202687_s_at	206216_at	205842_s_at	204011_at	204528_s_at	204360_s_at	205001_s_at	204015_s_at	204144_s_at	205742_at	205298_s_at	206281_at	204637_at	203207_s_at	205228_at	204169_at	204856_at	204417_at	204307_at	203776_at	206132_at	202770_s_at
205409_at	204661_at	205937_at	205396_at	204017_at	206164_at	202872_at	206275_s_at	205846_at	204097_s_at	204667_at	204382_at	205017_s_at	204148_s_at	204231_s_at	205777_at	205448_s_at	206488_s_at	204732_s_at	203217_s_at	205424_at	204266_s_at	204907_s_at	204576_s_at	204316_at	203867_s_at	206212_at	202874_s_at
205547_s_at	204747_at	206072_at	205446_s_at	204044_at	206171_at	202930_s_at	206310_at	205870_at	204112_s_at	204678_s_at	204383_at	205047_s_at	204179_at	204235_s_at	205873_at	205479_s_at	206495_s_at	204856_at	203262_s_at	205430_at	204316_at	204934_s_at	204601_at	204396_s_at	203918_at	206239_s_at	202890_at
205561_at	204823_at	206133_at	205617_at	204069_at	206183_s_at	202932_at	206336_at	205876_at	204147_s_at	204701_s_at	204494_s_at	205149_s_at	204201_s_at	204371_s_at	205986_at	205542_at	206538_at	204888_s_at	203271_s_at	205435_s_at	204384_at	205011_at	204621_s_at	204512_at	203961_at	206350_at	202971_s_at
205710_at	205218_at	206274_s_at	205787_x_at	204173_at	206227_at	202939_at	206339_at	206012_at	204209_at	204920_at	204512_at	205306_x_at	204217_s_at	204418_x_at	205990_s_at	205558_at	206669_at	204901_at	203330_s_at	205438_at	204505_s_at	205106_at	204645_at	204597_x_at	204073_s_at	206452_x_at	203101_s_at
205749_at	205248_at	206347_at	205822_s_at	204328_at	206463_s_at	202968_s_at	206467_x_at	206056_x_at	204268_at	204927_at	204635_at	205595_at	204250_s_at	204615_x_at	206048_at	205568_at	206679_at	204968_at	203364_s_at	205503_at	204663_at	205295_at	204701_s_at	204738_s_at	204231_s_at	206612_at	203165_s_at
206100_at	205280_at	206415_at	205881_at	204383_at	206477_s_at	202969_at	206512_at	206111_at	204308_s_at	204981_at	204790_at	205660_at	204286_s_at	204741_at	206132_at	205621_at	206708_at	205090_s_at	203437_at	205657_at	204757_s_at	205708_s_at	204745_x_at	204770_at	204247_s_at	206706_at	203208_s_at
206108_s_at	205305_at	206461_x_at	205920_at	204555_s_at	206539_s_at	203049_s_at	206593_s_at	206220_s_at	204325_s_at	205092_x_at	204799_at	205707_at	204413_at	204788_s_at	206182_at	205660_at	206765_at	205365_at	203538_at	205712_at	204837_at	205718_at	204820_s_at	204793_at	204251_s_at	206781_at	203227_s_at
206220_s_at	205330_at	206611_at	206088_at	204786_s_at	206594_at	203102_s_at	206665_s_at	206251_s_at	204331_s_at	205121_at	204826_at	205715_at	204420_at	204816_s_at	206196_s_at	205685_at	206783_at	205396_at	203598_s_at	205723_at	204840_s_at	205852_at	204912_at	204950_at	204257_at	206827_s_at	203232_s_at
206344_at	205435_s_at	206704_at	206184_at	204795_at	206612_at	203213_at	206718_at	206275_s_at	204441_s_at	205136_s_at	204994_at	205718_at	204564_at	204908_s_at	206361_at	205874_at	207006_s_at	205502_at	203640_at	205793_x_at	204866_at	206021_at	205011_at	204958_at	204308_s_at	206904_at	203279_at
206410_at	205569_at	206764_x_at	206383_s_at	204824_at	206666_at	203218_at	206747_at	206286_s_at	204684_at	205193_at	205010_at	205746_s_at	204615_x_at	204925_at	206397_x_at	206085_s_at	207039_at	205681_at	203771_s_at	205975_s_at	204909_at	206094_x_at	205119_s_at	204983_s_at	204346_s_at	206911_at	203310_at
206411_s_at	205575_at	206766_at	206411_s_at	204987_at	206670_s_at	203227_s_at	206956_at	206310_at	204691_x_at	205199_at	205022_s_at	205759_s_at	204637_at	204974_at	206521_s_at	206353_at	207065_at	205725_at	203787_at	205996_s_at	204982_at	206164_at	205313_at	205018_s_at	204504_s_at	207093_s_at	203420_at
206416_at	205585_at	206791_s_at	206412_at	205095_s_at	206780_at	203284_s_at	206959_s_at	206438_x_at	204720_s_at	205204_at	205119_s_at	205873_at	204667_at	205031_at	206526_at	206573_at	207158_at	205818_at	203822_s_at	206035_at	204998_s_at	206530_at	205327_s_at	205035_at	204560_at	207117_at	203479_s_at
206418_at	205660_at	206822_s_at	206607_at	205204_at	206862_at	203404_at	207008_at	206498_at	204769_s_at	205266_at	205145_s_at	205977_s_at	204717_s_at	205195_at	206607_at	206729_at	207172_s_at	205981_s_at	203869_at	206039_at	205002_at	206532_at	205436_s_at	205069_s_at	204678_s_at	207303_at	203538_at
206514_s_at	205662_at	206827_s_at	206745_at	205406_s_at	206943_at	203487_s_at	207038_at	206627_s_at	204989_s_at	205360_at	205169_at	206197_at	204925_at	205205_at	206615_s_at	207001_x_at	207263_x_at	206006_s_at	203901_at	206169_x_at	205035_at	206671_at	205494_at	205193_at	204735_at	207369_at	203689_s_at
206893_at	205777_at	206836_at	206748_s_at	205447_s_at	207189_s_at	203562_at	207241_at	206648_at	205070_at	205442_at	205233_s_at	206361_at	204934_s_at	205226_at	206651_s_at	207078_at	207388_s_at	206015_s_at	203964_at	206177_s_at	205079_s_at	206783_at	205608_s_at	205228_at	204745_x_at	207435_s_at	203725_at
207056_s_at	205817_at	206996_x_at	206780_at	205660_at	207270_x_at	203598_s_at	207283_at	206666_at	205076_s_at	205485_at	205271_s_at	206470_at	205002_at	205360_at	206697_s_at	207105_s_at	207408_at	206046_at	204129_at	206235_at	205197_s_at	206791_s_at	205639_at	205266_at	204806_x_at	207548_at	203827_at
207152_at	205856_at	207056_s_at	206907_at	205707_at	207359_at	203614_at	207292_s_at	206750_at	205198_s_at	205510_s_at	205446_s_at	206513_at	205017_s_at	205398_s_at	206747_at	207117_at	207440_at	206113_s_at	204147_s_at	206315_at	205210_at	207131_x_at	205643_s_at	205354_at	204826_at	207624_s_at	203855_at
207187_at	205986_at	207131_x_at	207000_s_at	205775_at	207408_at	203719_at	207296_at	206962_x_at	205273_s_at	205716_at	205661_s_at	206547_s_at	205018_s_at	205411_at	206994_at	207147_at	207665_at	206115_at	204216_s_at	206323_x_at	205411_at	207166_at	205809_s_at	205375_at	204856_at	207658_s_at	203897_at
207270_x_at	205990_s_at	207143_at	207001_x_at	205973_at	207491_at	203821_at	207351_s_at	207116_s_at	205566_at	205784_x_at	205716_at	206659_at	205032_at	205437_at	206999_at	207387_s_at	207712_at	206155_at	204296_at	206397_x_at	205930_at	207218_at	205988_at	205407_at	204991_s_at	207666_x_at	203911_at
207299_s_at	206027_at	207147_at	207061_at	206002_at	207691_x_at	203855_at	207554_x_at	207167_at	205614_x_at	205994_at	205907_s_at	206684_s_at	205050_s_at	205575_at	207082_at	207659_s_at	207737_at	206180_x_at	204313_s_at	206487_at	206076_at	207351_s_at	206105_at	205523_at	205160_at	207747_s_at	203925_at
207412_x_at	206048_at	207176_s_at	207115_x_at	206060_s_at	207712_at	203957_at	207564_x_at	207206_s_at	205676_at	206033_s_at	206036_s_at	206706_at	205081_at	205652_s_at	207093_s_at	207670_at	207917_at	206385_s_at	204344_s_at	206607_at	206276_at	207400_at	206118_at	205637_s_at	205192_at	207865_s_at	203935_at
207459_x_at	206190_at	207202_s_at	207130_at	206257_at	207798_s_at	204058_at	207617_at	207254_at	205707_at	206053_at	206088_at	206740_x_at	205102_at	205717_x_at	207175_at	207699_at	207919_at	206424_at	204426_at	206671_at	206467_x_at	207545_s_at	206218_at	205662_at	205251_at	207955_at	203950_s_at
207867_at	206521_s_at	207222_at	207263_x_at	206286_s_at	207868_at	204117_at	207680_x_at	207393_at	205797_s_at	206235_at	206183_s_at	206866_at	205141_at	205727_at	207263_x_at	207823_s_at	207976_at	206461_x_at	204448_s_at	206679_at	206495_s_at	207568_at	206342_x_at	205681_at	205293_x_at	207969_x_at	204058_at
207960_at	206543_at	207404_s_at	207283_at	206507_at	207926_at	204186_s_at	207694_at	207410_s_at	205873_at	206289_at	206529_x_at	207043_s_at	205155_s_at	205745_x_at	207269_at	208023_at	208104_s_at	206576_s_at	204555_s_at	206738_at	206723_s_at	207684_at	206453_s_at	205778_at	205340_at	207995_s_at	204176_at
207964_x_at	206673_at	207692_s_at	207425_s_at	206532_at	207976_at	204194_at	207735_at	207582_at	206103_at	206378_at	206833_s_at	207095_at	205165_at	205822_s_at	207315_at	208077_at	208182_x_at	206586_at	204572_s_at	206773_at	206838_at	207692_s_at	206461_x_at	205780_at	205598_at	207998_s_at	204285_s_at
208009_s_at	206683_at	207840_at	207439_s_at	206669_at	208015_at	204286_s_at	207800_at	207929_at	206147_x_at	206550_s_at	206845_s_at	207117_at	205167_s_at	205847_at	207400_at	208471_at	208278_s_at	206591_at	204780_s_at	206795_at	206967_at	207734_at	206661_at	205791_x_at	205877_s_at	208153_s_at	204286_s_at
208141_s_at	206832_s_at	207890_s_at	207549_x_at	206686_at	208031_s_at	204332_s_at	207836_s_at	208302_at	206472_s_at	206554_x_at	206933_s_at	207190_at	205446_s_at	205867_at	207445_s_at	208786_s_at	208280_at	206712_at	204899_s_at	207037_at	207247_s_at	207737_at	206781_at	205822_s_at	206076_at	208166_at	204333_s_at
208187_s_at	206907_at	207957_s_at	207782_s_at	206864_s_at	208037_s_at	204391_x_at	207866_at	208358_s_at	206734_at	206648_at	207046_at	207239_s_at	205490_x_at	205920_at	207452_s_at	208926_at	208301_at	206714_at	204925_at	207090_x_at	208199_s_at	207859_s_at	206825_at	206002_at	206106_at	208280_at	204334_at
208250_s_at	207006_s_at	207980_s_at	207897_at	206942_s_at	208090_s_at	204434_at	207917_at	208395_s_at	206764_x_at	206808_at	207084_at	207517_at	205494_at	205921_s_at	207511_s_at	209034_at	208422_at	206868_at	204946_s_at	207133_x_at	208322_s_at	207938_at	207100_s_at	206005_s_at	206401_s_at	208426_x_at	204384_at
208360_s_at	207098_s_at	208115_x_at	207931_s_at	207122_x_at	208128_x_at	204461_x_at	207969_x_at	208529_at	207105_s_at	206951_at	207239_s_at	207612_at	205660_at	205934_at	207518_at	209146_at	208519_x_at	206911_at	205224_at	207213_s_at	208633_s_at	208110_x_at	207176_s_at	206336_at	206544_x_at	208443_x_at	204453_at
208421_at	207099_s_at	208121_s_at	208055_s_at	207455_at	208272_at	204463_s_at	208047_s_at	208581_x_at	207132_x_at	207020_at	207291_at	207667_s_at	205822_s_at	206033_s_at	207578_s_at	209189_at	209097_s_at	207275_s_at	205349_at	207265_s_at	208710_s_at	208213_s_at	207184_at	206441_s_at	206744_s_at	208489_at	204568_at
208430_s_at	207379_at	208177_at	208188_at	207937_x_at	208301_at	204496_at	208195_at	208790_s_at	207319_s_at	207045_at	207331_at	207669_at	205847_at	206103_at	207596_at	209230_s_at	209158_s_at	207387_s_at	205520_at	207412_x_at	208728_s_at	208260_at	207238_s_at	206756_at	206961_s_at	208633_s_at	204601_at
208452_x_at	207746_at	208438_s_at	208280_at	207955_at	208347_at	204553_x_at	208366_at	209237_s_at	207423_s_at	207060_at	207365_x_at	207689_at	205905_s_at	206157_at	207686_s_at	209234_at	209427_at	207549_x_at	205723_at	207520_at	208814_at	208345_s_at	207462_at	206788_s_at	207124_s_at	208664_s_at	204615_x_at
208527_x_at	207754_at	208581_x_at	208297_s_at	207971_s_at	208379_x_at	204600_at	208414_s_at	209335_at	207435_s_at	207163_s_at	207387_s_at	207766_at	206019_at	206212_at	207711_at	209304_x_at	209544_at	207596_at	205822_s_at	207531_at	208914_at	208370_s_at	207691_x_at	206805_at	207206_s_at	208734_x_at	204784_s_at
208529_at	207755_at	208725_at	208325_s_at	208154_at	208483_x_at	204618_s_at	208416_s_at	209339_at	207559_s_at	207215_at	207986_x_at	207800_at	206248_at	206222_at	207890_s_at	209333_at	209589_s_at	207727_s_at	205888_s_at	207737_at	208931_s_at	208417_at	207734_at	206907_at	207499_x_at	208769_at	204918_s_at
208728_s_at	207937_x_at	209014_at	208385_at	208237_x_at	208506_at	204641_at	208573_s_at	209383_at	207776_s_at	207254_at	208119_s_at	207998_s_at	206411_s_at	206303_s_at	207921_x_at	209453_at	209646_x_at	207761_s_at	206060_s_at	208151_x_at	209119_x_at	208523_x_at	207861_at	207275_s_at	207877_s_at	209047_at	205027_s_at
208869_s_at	208003_s_at	209097_s_at	208568_at	208384_s_at	208850_s_at	205105_at	208760_at	209758_s_at	207936_x_at	207416_s_at	208149_x_at	208332_at	206498_at	206385_s_at	207939_x_at	209674_at	209726_at	207782_s_at	206063_x_at	208210_at	209128_s_at	208623_s_at	207873_x_at	207338_s_at	207971_s_at	209197_at	205032_at
208917_x_at	208025_s_at	209185_s_at	208591_s_at	208476_s_at	209170_s_at	205355_at	208982_at	209765_at	207945_s_at	207483_s_at	208536_s_at	208390_s_at	206574_s_at	206439_at	207950_s_at	209921_at	209791_at	207851_s_at	206098_at	208237_x_at	209166_s_at	208964_s_at	207890_s_at	207620_s_at	208200_at	209227_at	205060_at
209119_x_at	208255_s_at	209189_at	208763_s_at	208536_s_at	209253_at	205541_s_at	208989_s_at	209789_at	207950_s_at	207531_at	208831_x_at	208529_at	206724_at	206586_at	207953_at	209940_at	209913_x_at	208138_at	206113_s_at	208274_at	209179_s_at	209312_x_at	207953_at	207749_s_at	208433_s_at	209473_at	205479_s_at
209222_s_at	208296_x_at	209204_at	208925_at	208583_x_at	209269_s_at	205667_at	209244_s_at	209800_at	208182_x_at	207673_at	208860_s_at	208611_s_at	206818_s_at	206594_at	207980_s_at	210102_at	209926_at	208205_at	206323_x_at	208291_s_at	209244_s_at	209414_at	208439_s_at	207791_s_at	208659_at	209610_s_at	205657_at
209235_at	208518_s_at	209280_at	208926_at	208612_at	209436_at	205746_s_at	209245_s_at	209866_s_at	208316_s_at	207705_s_at	208973_at	208763_s_at	207001_x_at	206706_at	208138_at	210185_at	209957_s_at	208247_at	206383_s_at	208297_s_at	209403_at	209530_at	208451_s_at	207982_at	208719_s_at	209622_at	205780_at
209348_s_at	208599_at	209292_at	208960_s_at	208806_at	209713_s_at	205799_s_at	209446_s_at	209893_s_at	208324_at	207823_s_at	209221_s_at	208862_s_at	207017_at	206846_s_at	208149_x_at	210269_s_at	210107_at	208373_s_at	206491_s_at	208415_x_at	209525_at	209590_at	208581_x_at	208097_s_at	208923_at	209636_at	205822_s_at
209359_x_at	208711_s_at	209339_at	208961_s_at	208814_at	209719_x_at	205887_x_at	209469_at	209921_at	208369_s_at	207827_x_at	209298_s_at	208886_at	207018_s_at	206906_at	208178_x_at	210385_s_at	210268_at	208390_s_at	206918_s_at	208477_at	209675_s_at	209657_s_at	208587_s_at	208157_at	208930_s_at	209655_s_at	205905_s_at
209443_at	208719_s_at	209359_x_at	209018_s_at	209136_s_at	209775_x_at	206034_at	209561_at	210001_s_at	208515_at	207974_s_at	209381_x_at	209011_at	207232_s_at	206927_s_at	208332_at	210405_x_at	210286_s_at	208596_s_at	206966_s_at	208670_s_at	209779_at	209732_at	208664_s_at	208318_s_at	208937_s_at	209744_x_at	206034_at
209561_at	208747_s_at	209383_at	209052_s_at	209168_at	209857_s_at	206046_at	209689_at	210083_at	208619_at	208264_s_at	209420_s_at	209071_s_at	207263_x_at	206966_s_at	208488_s_at	210435_at	210305_at	208622_s_at	207172_s_at	208914_at	209898_x_at	209760_at	208816_x_at	208394_x_at	209005_at	209920_at	206247_at
209570_s_at	208833_s_at	209485_s_at	209230_s_at	209364_at	209881_s_at	206096_at	209830_s_at	210162_s_at	208760_at	208385_at	209575_at	209098_s_at	207334_s_at	207056_s_at	208518_s_at	210442_at	210330_at	208647_at	207206_s_at	209031_at	209910_at	209833_at	209002_s_at	208499_s_at	209038_s_at	209923_s_at	206507_at
209584_x_at	209002_s_at	209614_at	209270_at	209369_at	210102_at	206115_at	209857_s_at	210165_at	208816_x_at	208657_s_at	209696_at	209230_s_at	207425_s_at	207137_at	208610_s_at	210596_at	210433_at	208763_s_at	207239_s_at	209042_s_at	210047_at	210005_at	209065_at	208701_at	209052_s_at	209937_at	206607_at
209589_s_at	209062_x_at	209767_s_at	209415_at	209371_s_at	210127_at	206621_s_at	209973_at	210182_at	209011_at	208713_at	209698_at	209383_at	207608_x_at	207452_s_at	208735_s_at	210666_at	210615_at	208772_at	207424_at	209070_s_at	210088_x_at	210059_s_at	209102_s_at	208853_s_at	209083_at	210061_at	206613_s_at
209672_s_at	209079_x_at	209875_s_at	209419_at	209426_s_at	210146_x_at	207001_x_at	209992_at	210300_at	209195_s_at	208725_at	209761_s_at	209427_at	207620_s_at	207528_s_at	208741_at	210695_s_at	210651_s_at	208785_s_at	207549_x_at	209297_at	210251_s_at	210108_at	209118_s_at	209038_s_at	209196_at	210176_at	206766_at
209703_x_at	209144_s_at	209921_at	209508_x_at	209486_at	210158_at	207098_s_at	210015_s_at	210367_s_at	209196_at	208810_at	209963_s_at	209435_s_at	207953_at	207626_s_at	208811_s_at	210705_s_at	210711_at	208881_x_at	207630_s_at	209335_at	210358_x_at	210141_s_at	209123_at	209098_s_at	209297_at	210360_s_at	206875_s_at
209736_at	209150_s_at	209962_at	209635_at	209522_s_at	210409_at	207185_at	210021_s_at	210550_s_at	209275_s_at	208971_at	210002_at	209457_at	208194_s_at	207761_s_at	208869_s_at	210743_s_at	210765_at	208935_s_at	207916_at	209341_s_at	210714_at	210166_at	209204_at	209101_at	209490_s_at	210366_at	207002_s_at
210036_s_at	209195_s_at	210039_s_at	209882_at	209531_at	210479_s_at	207458_at	210089_s_at	210608_s_at	209365_s_at	208989_s_at	210130_s_at	209529_at	208226_x_at	207934_at	209335_at	210775_x_at	210822_at	208962_s_at	207983_s_at	209394_at	211598_x_at	210223_s_at	209216_at	209150_s_at	209527_at	210379_s_at	207115_x_at
210210_at	209205_s_at	210062_s_at	209958_s_at	209535_s_at	210539_at	207554_x_at	210107_at	210662_at	209473_at	209361_s_at	210226_at	209578_s_at	208297_s_at	207949_s_at	209410_s_at	210858_x_at	210875_s_at	208963_x_at	208129_x_at	209508_x_at	211947_s_at	210239_at	209328_x_at	209184_s_at	209650_s_at	210437_at	207549_x_at
210307_s_at	209230_s_at	210165_at	209994_s_at	209544_at	210585_s_at	207719_x_at	210127_at	210940_s_at	209490_s_at	209413_at	210230_at	209668_x_at	208536_s_at	207990_x_at	209416_s_at	210865_at	210961_s_at	208964_s_at	208144_s_at	209556_at	212000_at	210263_at	209333_at	209185_s_at	209975_at	210555_s_at	207976_at
210309_at	209345_s_at	210337_s_at	210012_s_at	209646_x_at	210610_at	207956_x_at	210158_at	211029_x_at	209689_at	209414_at	210262_at	209808_x_at	208763_s_at	208383_s_at	209441_at	211012_s_at	211001_at	209118_s_at	208182_x_at	209561_at	212030_at	210301_at	209408_at	209276_s_at	210026_s_at	210575_at	208044_s_at
210368_at	209457_at	210524_x_at	210041_s_at	209714_s_at	210640_s_at	208070_s_at	210263_at	211095_at	209760_at	209438_at	210627_s_at	209964_s_at	208853_s_at	208881_x_at	209570_s_at	211076_x_at	211012_s_at	209218_at	208314_at	209618_at	212044_s_at	210349_at	209416_s_at	209280_at	210182_at	210584_s_at	208118_x_at
210583_at	209485_s_at	210579_s_at	210062_s_at	209715_at	210662_at	208630_at	210360_s_at	211182_x_at	209762_x_at	209528_s_at	210816_s_at	210100_s_at	208964_s_at	208926_at	209645_s_at	211126_s_at	211059_s_at	209242_at	208456_s_at	209619_at	212057_at	210499_s_at	209522_s_at	209357_at	210257_x_at	210671_x_at	208591_s_at
210619_s_at	209589_s_at	210616_s_at	210095_s_at	209776_s_at	210707_x_at	208679_s_at	210404_x_at	211194_s_at	209938_at	209530_at	210891_s_at	210120_s_at	209010_s_at	208962_s_at	209725_at	211133_x_at	211085_s_at	209276_s_at	208510_s_at	210021_s_at	212113_at	210640_s_at	209650_s_at	209441_at	210367_s_at	210707_x_at	208621_s_at
210634_at	209622_at	210617_at	210337_s_at	209813_x_at	210714_at	208734_x_at	210511_s_at	211213_at	210042_s_at	209667_at	210910_s_at	210129_s_at	209373_at	208963_x_at	210062_s_at	211144_x_at	211110_s_at	209502_s_at	208613_s_at	210036_s_at	212127_at	210752_s_at	209738_x_at	209447_at	210555_s_at	210765_at	208623_s_at
210679_x_at	209682_at	210693_at	210436_at	209893_s_at	210734_x_at	208766_s_at	210690_at	211280_s_at	210158_at	209881_s_at	210926_at	210132_at	209383_at	209062_x_at	210109_at	211230_s_at	211551_at	209544_at	208633_s_at	210091_s_at	212164_at	210783_x_at	209824_s_at	209559_at	210627_s_at	210785_s_at	208657_s_at
210829_s_at	209691_s_at	210799_at	210513_s_at	209898_x_at	210736_x_at	208838_at	210704_at	211305_x_at	210243_s_at	209938_at	211093_at	210159_s_at	209591_s_at	209146_at	210132_at	211260_at	211613_s_at	209611_s_at	208647_at	210378_s_at	212189_s_at	210874_s_at	209858_x_at	209566_at	210974_s_at	211042_x_at	208671_at
210933_s_at	209744_x_at	210822_at	210703_at	209938_at	210739_x_at	208841_s_at	210818_s_at	211393_at	210281_s_at	210020_x_at	211329_x_at	210300_at	209608_s_at	209453_at	210214_s_at	211295_x_at	211616_s_at	209682_at	208693_s_at	210414_at	212285_s_at	210878_s_at	210176_at	209682_at	211087_x_at	211105_s_at	208763_s_at
211013_x_at	209760_at	210917_at	210704_at	210058_at	210760_x_at	208873_s_at	210858_x_at	211424_x_at	210425_x_at	210242_x_at	211456_x_at	210307_s_at	209808_x_at	209479_at	210226_at	211305_x_at	211892_s_at	209786_at	208734_x_at	210538_s_at	212300_at	210936_at	210230_at	209834_at	211172_x_at	211106_at	208783_s_at
211113_s_at	209874_x_at	211019_s_at	210807_s_at	210282_at	210797_s_at	208986_at	210925_at	211456_x_at	210449_x_at	210282_at	211538_s_at	210462_at	209920_at	209538_at	210809_s_at	211559_s_at	212025_s_at	209856_x_at	208850_s_at	210539_at	212338_at	211426_x_at	210249_s_at	209897_s_at	211474_s_at	211139_s_at	208785_s_at
211330_s_at	209947_at	211022_s_at	210808_s_at	210290_at	210800_at	209004_s_at	210933_s_at	211484_s_at	210477_x_at	210366_at	211721_s_at	210480_s_at	210001_s_at	209543_s_at	211235_s_at	212153_at	212045_at	209882_at	208926_at	210641_at	212393_at	211444_at	210384_at	209909_s_at	211679_x_at	211250_s_at	208979_at
211748_x_at	210102_at	211027_s_at	211017_s_at	210319_x_at	210828_s_at	209084_s_at	211179_at	211506_s_at	210499_s_at	210444_at	212069_s_at	210498_at	210234_at	209588_at	211276_at	212276_at	212059_s_at	209890_at	209034_at	210647_x_at	212424_at	211553_x_at	210401_at	209946_at	211719_x_at	211424_x_at	209014_at
211798_x_at	210105_s_at	211059_s_at	211019_s_at	210792_x_at	210841_s_at	209434_s_at	211182_x_at	211540_s_at	210531_at	210458_s_at	212291_at	210499_s_at	210417_s_at	209608_s_at	211305_x_at	212286_at	212127_at	209935_at	209066_x_at	210745_at	212632_at	211621_at	210499_s_at	210041_s_at	211852_s_at	211450_s_at	209034_at
211810_s_at	210319_x_at	211086_x_at	211027_s_at	210894_s_at	210865_at	209438_at	211253_x_at	211722_s_at	210630_s_at	210531_at	212431_at	210513_s_at	210641_at	209689_at	211327_x_at	212469_at	212392_s_at	209939_x_at	209146_at	211052_s_at	212648_at	211925_s_at	210524_x_at	210045_at	211855_s_at	211462_s_at	209112_at
211976_at	210817_s_at	211203_s_at	211092_s_at	210993_s_at	210991_s_at	209741_x_at	211340_s_at	211795_s_at	210760_x_at	210631_at	212518_at	210605_s_at	210666_at	209716_at	211348_s_at	212521_s_at	212495_at	209962_at	209160_at	211087_x_at	212677_s_at	212096_s_at	210644_s_at	210120_s_at	211886_s_at	211541_s_at	209230_s_at
212223_at	210943_s_at	211355_x_at	211218_at	211016_x_at	211006_s_at	209814_at	211432_s_at	211799_x_at	210988_s_at	210681_s_at	212525_s_at	210764_s_at	210714_at	209765_at	211349_at	212533_at	212562_s_at	209970_x_at	209217_s_at	211123_at	212711_at	212157_at	210778_s_at	210242_x_at	212194_s_at	211626_x_at	209238_at
212255_s_at	210950_s_at	211402_x_at	211261_at	211091_s_at	211029_x_at	209938_at	211526_s_at	211808_s_at	211019_s_at	210687_at	212674_s_at	210797_s_at	210732_s_at	209848_s_at	211515_s_at	212636_at	212567_s_at	210033_s_at	209218_at	211181_x_at	212738_at	212243_at	210829_s_at	210284_s_at	212312_at	211654_x_at	209352_s_at
212260_at	211038_s_at	211668_s_at	211299_s_at	211092_s_at	211116_at	209970_x_at	211602_s_at	211923_s_at	211060_x_at	210926_at	212772_s_at	210854_x_at	210749_x_at	210007_s_at	211527_x_at	212659_s_at	212662_at	210182_at	209230_s_at	211225_at	212753_at	212306_at	210858_x_at	210538_s_at	212403_at	211798_x_at	209451_at
212347_x_at	211085_s_at	211704_s_at	211316_x_at	211205_x_at	211143_x_at	210144_at	211979_at	211958_at	211252_x_at	211774_s_at	212786_at	210870_s_at	210950_s_at	210069_at	211620_x_at	212778_at	213043_s_at	210220_at	209234_at	211261_at	212765_at	212366_at	210925_at	210598_at	212496_s_at	212092_at	209501_at
212416_at	211094_s_at	211708_s_at	211467_s_at	211256_x_at	211230_s_at	210293_s_at	211996_s_at	212157_at	211391_s_at	212139_at	212879_x_at	210906_x_at	211019_s_at	210130_s_at	211886_s_at	212780_at	213130_at	210223_s_at	209238_at	211287_x_at	212876_at	212467_at	210986_s_at	210616_s_at	212540_at	212136_at	209508_x_at
212419_at	211130_x_at	211811_s_at	211559_s_at	211325_x_at	211325_x_at	210596_at	212252_at	212158_at	211528_x_at	212323_s_at	212966_at	210932_s_at	211093_at	210132_at	212026_s_at	212798_s_at	213193_x_at	210299_s_at	209383_at	211364_at	212881_at	212488_at	211040_x_at	210678_s_at	212660_at	212324_s_at	209510_at
212516_at	211202_s_at	211833_s_at	211599_x_at	211330_s_at	211332_x_at	210608_s_at	212457_at	212185_x_at	211529_x_at	212339_at	212969_x_at	210944_s_at	211141_s_at	210242_x_at	212044_s_at	212845_at	213201_s_at	210357_s_at	209759_s_at	211551_at	212886_at	212555_at	211316_x_at	210733_at	212722_s_at	212477_at	209704_at
212562_s_at	211254_x_at	211863_x_at	211660_at	211628_x_at	211427_s_at	210907_s_at	212516_at	212259_s_at	211852_s_at	212344_at	213069_at	211012_s_at	211237_s_at	210286_s_at	212092_at	212914_at	213481_at	210568_s_at	209882_at	211575_s_at	212916_at	212617_at	211366_x_at	210764_s_at	212766_s_at	212557_at	209786_at
212703_at	211363_s_at	211886_s_at	211807_x_at	211658_at	211453_s_at	211038_s_at	212520_s_at	212423_at	211864_s_at	212346_s_at	213075_at	211048_s_at	211456_x_at	210300_at	212134_at	212968_at	213490_s_at	210592_s_at	209921_at	211647_x_at	212973_at	212658_at	211374_x_at	210847_x_at	212791_at	212658_at	209884_s_at
212744_at	211447_s_at	212185_x_at	212095_s_at	211792_s_at	211540_s_at	211056_s_at	212803_at	212608_s_at	211886_s_at	212518_at	213204_at	211124_s_at	211567_at	210358_x_at	212188_at	212976_at	213553_x_at	210676_x_at	210107_at	211792_s_at	212994_at	212887_at	211386_at	211051_s_at	212915_at	212827_at	209921_at
212819_at	211487_x_at	212272_at	212156_at	211810_s_at	211616_s_at	211113_s_at	213210_at	212907_at	211934_x_at	212567_s_at	213242_x_at	211182_x_at	211570_s_at	210539_at	212262_at	213066_at	213584_s_at	210796_x_at	210156_s_at	211881_x_at	213040_s_at	212913_at	211652_s_at	211092_s_at	212918_at	212876_at	209939_x_at
212940_at	211513_s_at	212274_at	212157_at	211911_x_at	211643_x_at	211250_s_at	213236_at	212942_s_at	212025_s_at	212618_at	213244_at	211280_s_at	211598_x_at	210592_s_at	212559_at	213075_at	213635_s_at	210801_at	210337_s_at	211973_at	213141_at	212930_at	211795_s_at	211143_x_at	213130_at	212931_at	210041_s_at
212950_at	211692_s_at	212386_at	212162_at	211973_at	211807_x_at	211348_s_at	213351_s_at	213210_at	212053_at	212722_s_at	213312_at	211364_at	211740_at	210618_at	212772_s_at	213103_at	213660_s_at	210813_s_at	210372_s_at	212475_at	213216_at	213094_at	212051_at	211182_x_at	213139_at	213028_at	210233_at
213073_at	211763_s_at	212642_s_at	212272_at	212093_s_at	211826_s_at	211628_x_at	213432_at	213332_at	212100_s_at	212924_s_at	213530_at	211435_at	211782_at	210711_at	212827_at	213114_at	213944_x_at	210839_s_at	210448_s_at	212748_at	213221_s_at	213207_s_at	212119_at	211297_s_at	213260_at	213114_at	210240_s_at
213155_at	211943_x_at	212706_at	212291_at	212272_at	212478_at	211684_s_at	213520_at	213380_x_at	212171_x_at	212980_at	213626_at	211439_at	211936_at	210808_s_at	212957_s_at	213256_at	214000_s_at	210879_s_at	210534_s_at	212784_at	213280_at	213313_at	212169_at	211518_s_at	213352_at	213286_at	210256_s_at
213285_at	211979_at	212755_at	212445_s_at	212376_s_at	212679_at	211733_x_at	213539_at	213432_at	212177_at	213038_at	213668_s_at	211602_s_at	212338_at	210854_x_at	213001_at	213261_at	214012_at	210923_at	210734_x_at	212964_at	213350_at	213324_at	212185_x_at	211566_x_at	213531_s_at	213375_s_at	210596_at
213431_x_at	212000_at	212819_at	212471_at	212475_at	212743_at	211764_s_at	213569_at	213466_at	212238_at	213130_at	213856_at	211654_x_at	212345_s_at	210879_s_at	213030_s_at	213281_at	214072_x_at	210950_s_at	210801_at	212991_at	213402_at	213518_at	212314_at	211661_x_at	213624_at	213380_x_at	210705_s_at
213547_at	212010_s_at	212859_x_at	212478_at	212772_s_at	212831_at	211992_at	213816_s_at	213629_x_at	212267_at	213138_at	213908_at	211718_at	212404_s_at	210932_s_at	213085_s_at	213392_at	214076_at	211423_s_at	210864_x_at	213363_at	213435_at	213600_at	212317_at	211919_s_at	213792_s_at	213537_at	210999_s_at
213551_x_at	212014_x_at	212965_at	212598_at	212816_s_at	213177_at	212043_at	213825_at	214021_x_at	212323_s_at	213208_at	214048_at	211924_s_at	212418_at	210950_s_at	213209_at	213394_at	214148_at	211444_at	210950_s_at	213396_s_at	213489_at	213635_s_at	212345_s_at	211936_at	213833_x_at	213728_at	211061_s_at
213615_at	212057_at	213111_at	212777_at	212848_s_at	213228_at	212129_at	214020_x_at	214023_x_at	212395_s_at	213292_s_at	214326_x_at	211936_at	212444_at	211019_s_at	213249_at	213401_s_at	214225_at	211559_s_at	211061_s_at	213575_at	213499_at	213712_at	212457_at	212026_s_at	213848_at	213791_at	211162_x_at
213641_at	212110_at	213162_at	212879_x_at	212926_at	213591_at	212138_at	214099_s_at	214081_at	212409_s_at	213379_at	214402_s_at	212090_at	212567_s_at	211162_x_at	213345_at	213455_at	214340_at	211708_s_at	211090_s_at	213724_s_at	213514_s_at	213804_at	212467_at	212084_at	214062_x_at	213847_at	211302_s_at
213716_s_at	212310_at	213173_at	213060_s_at	212931_at	213675_at	212176_at	214104_at	214149_s_at	212436_at	213437_at	214692_s_at	212253_x_at	212668_at	211433_x_at	213450_s_at	213474_at	214588_s_at	211753_s_at	211162_x_at	213825_at	213577_at	213833_x_at	212504_at	212147_at	214076_at	214090_at	211404_s_at
213719_s_at	212327_at	213348_at	213112_s_at	213127_s_at	213731_s_at	212204_at	214307_at	214156_at	212439_at	213625_at	214748_at	212501_at	212686_at	211458_s_at	213778_x_at	213555_at	214745_at	211881_x_at	211403_x_at	213942_at	213668_s_at	213861_s_at	212509_s_at	212162_at	214196_s_at	214137_at	211506_s_at
213728_at	212365_at	213367_at	213242_x_at	213173_at	213771_at	212207_at	214486_x_at	214191_at	212443_at	213631_x_at	214755_at	212561_at	212778_at	211559_s_at	213785_at	213595_s_at	214781_at	212117_at	211423_s_at	214058_at	213681_at	213900_at	212623_at	212172_at	214209_s_at	214282_at	211527_x_at
213988_s_at	212397_at	213500_at	213455_at	213224_s_at	213819_s_at	212262_at	214707_x_at	214249_at	212495_at	213642_at	214877_at	212617_at	212935_at	212000_at	213829_x_at	213596_at	214828_s_at	212119_at	211464_x_at	214213_x_at	213743_at	213963_s_at	212634_at	212184_s_at	214333_x_at	214345_at	211559_s_at
214013_s_at	212416_at	213575_at	213469_at	213282_at	213827_at	212294_at	214713_at	214286_at	212525_s_at	213665_at	214881_s_at	212811_x_at	212942_s_at	212093_s_at	213988_s_at	213601_at	214836_x_at	212268_at	211536_x_at	214232_at	213918_s_at	213981_at	212735_at	212222_at	214550_s_at	214415_at	211708_s_at
214278_s_at	212811_x_at	213639_s_at	213474_at	213352_at	213900_at	212499_s_at	214802_at	214365_at	212691_at	213684_s_at	214895_s_at	213003_s_at	212957_s_at	212095_s_at	214001_x_at	213686_at	215058_at	212390_at	211653_x_at	214252_s_at	213935_at	214169_at	212737_at	212294_at	214617_at	214428_x_at	211760_s_at
214310_s_at	212823_s_at	213641_at	213562_s_at	213469_at	214158_s_at	212536_at	214814_at	214385_s_at	212730_at	213791_at	215190_at	213038_at	212998_x_at	212272_at	214041_x_at	213791_at	215137_at	212620_at	211668_s_at	214372_x_at	213957_s_at	214209_s_at	212745_s_at	212360_at	214753_at	214525_x_at	211862_x_at
214335_at	212834_at	213659_at	213658_at	213481_at	214402_s_at	212567_s_at	214822_at	214679_x_at	212791_at	213810_s_at	215208_x_at	213076_at	213178_s_at	212302_at	214196_s_at	213965_s_at	215198_s_at	212623_at	211986_at	214563_at	214313_s_at	214334_x_at	212858_at	212390_at	214758_at	214613_at	212095_s_at
214674_at	212956_at	213768_s_at	213819_s_at	213504_at	214458_at	212606_at	214857_at	214817_at	212796_s_at	213853_at	215354_s_at	213094_at	213228_at	212339_at	214213_x_at	213999_at	215439_x_at	212736_at	212102_s_at	214606_at	214481_at	214448_x_at	213269_at	212444_at	215105_at	214778_at	212112_s_at
214788_x_at	212985_at	213799_s_at	213875_x_at	213529_at	214518_at	212636_at	215263_at	214915_at	212818_s_at	213907_at	215372_x_at	213112_s_at	213268_at	212392_s_at	214506_at	214289_at	215443_at	212741_at	212120_at	214616_at	214592_s_at	214582_at	213348_at	212657_s_at	215190_at	214818_at	212120_at
214793_at	212992_at	213827_at	213963_s_at	213569_at	214546_s_at	212725_s_at	215284_at	214935_at	212844_at	213912_at	215399_s_at	213176_s_at	213343_s_at	212471_at	214543_x_at	214365_at	215519_x_at	212853_at	212220_at	214634_at	214626_s_at	214676_x_at	213441_x_at	212672_at	215221_at	214877_at	212127_at
214848_at	213045_at	213930_at	213981_at	213572_s_at	214609_at	212726_at	215387_x_at	214953_s_at	212902_at	214041_x_at	215455_at	213177_at	213512_at	212651_at	214606_at	214452_at	215522_at	212882_at	212274_at	214699_x_at	214659_x_at	214953_s_at	213502_x_at	212724_at	215304_at	214963_at	212163_at
214867_at	213142_x_at	213964_x_at	213999_at	213575_at	214634_at	212834_at	215398_at	214979_at	212947_at	214194_at	215483_at	213277_at	213577_at	212705_x_at	214634_at	214469_at	215526_at	213000_at	212286_at	214744_s_at	214707_x_at	215073_s_at	213503_x_at	212803_at	215364_s_at	215178_x_at	212184_s_at
215070_x_at	213238_at	213973_at	214108_at	213624_at	214642_x_at	212851_at	215508_at	215002_at	212963_at	214213_x_at	215525_at	213371_at	213591_at	212864_at	214759_at	214508_x_at	215587_x_at	213158_at	212379_at	214760_at	214723_x_at	215126_at	213572_s_at	212902_at	215412_x_at	215342_s_at	212186_at
215131_at	213284_at	214000_s_at	214336_s_at	213679_at	214863_at	212863_x_at	215513_at	215058_at	213067_at	214232_at	215535_s_at	213419_at	213836_s_at	212902_at	214828_s_at	214539_at	215589_at	213562_s_at	212392_s_at	214816_x_at	214746_s_at	215356_at	213629_x_at	212916_at	215504_x_at	215376_at	212272_at
215200_x_at	213289_at	214137_at	214476_at	213868_s_at	215019_x_at	212884_x_at	215550_at	215138_s_at	213341_at	214257_s_at	215591_at	213484_at	214066_x_at	213174_at	214844_s_at	214657_s_at	215698_at	213836_s_at	212505_s_at	214818_at	214881_s_at	215366_at	213742_at	213106_at	215568_x_at	215480_at	212293_at
215233_at	213347_x_at	214238_at	214513_s_at	213875_x_at	215152_at	212927_at	215585_at	215356_at	213351_s_at	214316_x_at	215607_x_at	213486_at	214076_at	213343_s_at	214879_x_at	214732_at	215699_x_at	214033_at	212564_at	214885_at	215038_s_at	215485_s_at	213930_at	213202_at	215623_x_at	215507_x_at	212305_s_at
215344_at	213388_at	214311_at	214544_s_at	213999_at	215197_at	212944_at	215685_s_at	215410_at	213370_s_at	214428_x_at	215694_at	213575_at	214436_at	213393_at	214969_at	214788_x_at	215725_at	214166_at	212595_s_at	214892_x_at	215092_s_at	215607_x_at	214085_x_at	213258_at	215989_at	215527_at	212390_at
215378_at	213524_s_at	214412_at	214552_s_at	214019_at	215201_at	213064_at	215718_s_at	215516_at	213435_at	214508_x_at	215825_at	213609_s_at	214449_s_at	213448_at	215032_at	214861_at	215785_s_at	214177_s_at	212647_at	214933_at	215204_at	215761_at	214108_at	213260_at	216202_s_at	215575_at	212418_at
215397_x_at	213544_at	214872_at	214638_s_at	214073_at	215308_at	213092_x_at	215874_at	215564_at	213718_at	214556_at	215909_x_at	213629_x_at	214487_s_at	213627_at	215080_s_at	214906_x_at	215886_x_at	214196_s_at	212658_at	215044_s_at	215209_at	215824_at	214211_at	213358_at	216265_x_at	215589_at	212470_at
215443_at	213575_at	214910_s_at	214657_s_at	214101_s_at	215322_at	213102_at	215968_at	215847_at	213804_at	214848_at	215978_x_at	213651_at	214627_at	213771_at	215082_at	214930_at	215925_s_at	214233_at	212780_at	215214_at	215269_at	215916_at	214232_at	213389_at	216283_s_at	215710_at	212623_at
215609_at	213664_at	214980_at	214713_at	214138_at	215377_at	213140_s_at	215986_at	215850_s_at	213840_s_at	214923_at	216006_at	213756_s_at	214796_at	213836_s_at	215250_at	214972_at	216057_at	214283_at	212800_at	215358_x_at	215343_at	216012_at	214657_s_at	213397_x_at	216442_x_at	215810_x_at	212672_at
215610_at	213672_at	215032_at	214972_at	214337_at	215479_at	213178_s_at	216067_at	216013_at	214022_s_at	214936_at	216025_x_at	213829_x_at	214816_x_at	213844_at	215304_at	214989_x_at	216077_s_at	214321_at	212812_at	215360_at	215423_at	216044_x_at	214749_s_at	213776_at	216628_at	215845_x_at	212745_s_at
215626_at	213758_at	215212_at	215046_at	214800_x_at	215501_s_at	213244_at	216121_at	216092_s_at	214190_x_at	214958_s_at	216105_x_at	213963_s_at	214857_at	214130_s_at	215366_at	215016_x_at	216113_at	214326_x_at	212817_at	215440_s_at	215474_at	216105_x_at	214989_x_at	213836_s_at	216794_at	215935_at	212777_at
215628_x_at	213854_at	215218_s_at	215050_x_at	214801_at	215512_at	213355_at	216123_x_at	216110_x_at	214260_at	215013_s_at	216188_at	213972_at	214871_x_at	214175_x_at	215383_x_at	215071_s_at	216114_at	214435_x_at	212838_at	215499_at	215714_s_at	216150_at	215009_s_at	214108_at	217270_s_at	215995_x_at	212812_at
215820_x_at	214008_at	215298_at	215357_s_at	214934_at	215575_at	213391_at	216187_x_at	216189_at	214377_s_at	215073_s_at	216385_at	213976_at	214950_at	214176_s_at	215491_at	215182_x_at	216131_at	214542_x_at	212853_at	215506_s_at	216211_at	216300_x_at	215012_at	214176_s_at	217576_x_at	216012_at	212887_at
215834_x_at	214039_s_at	215310_at	215377_at	215131_at	215641_at	213473_at	216247_at	216226_at	214686_at	215218_s_at	216508_x_at	214135_at	215135_at	214177_s_at	215506_s_at	215274_at	216152_at	214819_at	212886_at	215513_at	216555_at	216366_x_at	215013_s_at	214310_s_at	217585_at	216146_at	212989_at
215866_at	214213_x_at	215328_at	215437_x_at	215159_s_at	215701_at	213508_at	216310_at	216248_s_at	214727_at	215343_at	216525_x_at	214185_at	215148_s_at	214196_s_at	215526_at	215370_at	216172_at	214852_x_at	212969_x_at	215519_x_at	216645_at	216455_at	215203_at	214354_x_at	217665_at	216226_at	213017_at
215968_at	214313_s_at	215390_at	215458_s_at	215160_x_at	215725_at	213544_at	216352_x_at	216254_at	214780_s_at	215439_x_at	216553_x_at	214347_s_at	215253_s_at	214216_s_at	215557_at	215415_s_at	216297_at	215055_at	212986_s_at	215585_at	216740_at	216638_s_at	215246_at	214586_at	217684_at	216320_x_at	213070_at
215987_at	214337_at	215402_at	215570_s_at	215401_at	215756_at	213701_at	216519_s_at	216462_at	214806_at	215615_x_at	216806_at	214470_at	215329_s_at	214236_at	215583_at	215493_x_at	216412_x_at	215093_at	213030_s_at	215616_s_at	216803_at	216647_at	215485_s_at	214701_s_at	217704_x_at	216374_at	213111_at
216005_at	214338_at	215516_at	215673_at	215451_s_at	215892_at	213728_at	216715_at	216527_at	214828_s_at	215693_x_at	216858_x_at	214516_at	215357_s_at	214336_s_at	215591_at	215659_at	216499_at	215434_x_at	213058_at	215618_at	216822_x_at	216730_at	215583_at	214803_at	217719_at	216417_x_at	213401_s_at
216036_x_at	214537_at	215595_x_at	215687_x_at	215457_at	216017_s_at	213827_at	216776_at	216549_s_at	214833_at	215822_x_at	217040_x_at	214531_s_at	215372_x_at	214355_x_at	215600_x_at	215670_s_at	216546_s_at	215551_at	213222_at	215660_s_at	216882_s_at	216762_at	215637_at	215029_at	217739_s_at	216429_at	213406_at
216121_at	214607_at	215687_x_at	215891_s_at	215516_at	216022_at	213945_s_at	216784_at	216650_at	214953_s_at	215850_s_at	217045_x_at	214655_at	215467_x_at	214444_s_at	215626_at	216095_x_at	216549_s_at	215649_s_at	213490_s_at	215695_s_at	216941_s_at	216823_at	215645_at	215159_s_at	218041_x_at	216486_x_at	213562_s_at
216144_at	214614_at	215824_at	215995_x_at	215543_s_at	216139_s_at	214140_at	216788_at	216739_at	215032_at	215852_x_at	217165_x_at	214692_s_at	215519_x_at	214554_at	215645_at	216183_at	216551_x_at	215758_x_at	213562_s_at	215764_x_at	217016_x_at	216841_s_at	215756_at	215162_at	218070_s_at	216507_at	213624_at
216189_at	214769_at	215855_s_at	216012_at	215778_x_at	216177_at	214281_s_at	216856_s_at	216740_at	215040_at	215881_x_at	217223_s_at	214923_at	215551_at	214609_at	215662_at	216184_s_at	216668_at	216060_s_at	213577_at	215766_at	217027_x_at	217014_s_at	215836_s_at	215200_x_at	218177_at	216761_at	213703_at
216196_at	214783_s_at	215881_x_at	216034_at	215852_x_at	216256_at	214322_at	216905_s_at	216758_at	215260_s_at	215909_x_at	217257_at	215410_at	215595_x_at	214818_at	215757_at	216197_at	216730_at	216111_x_at	213659_at	215985_at	217152_at	217129_at	215856_at	215304_at	218211_s_at	216856_s_at	213792_s_at
216225_at	214857_at	215927_at	216080_s_at	215856_at	216282_x_at	214334_x_at	216934_at	216767_at	215484_at	215954_s_at	217591_at	215519_x_at	215641_at	214999_s_at	215931_s_at	216220_s_at	216739_at	216336_x_at	213729_at	216110_x_at	217612_at	217291_at	215888_at	215333_x_at	218236_s_at	216882_s_at	213836_s_at
216278_at	214906_x_at	215945_s_at	216100_s_at	215920_s_at	216422_at	214371_at	216940_x_at	216839_at	215497_s_at	215966_x_at	217602_at	215535_s_at	215670_s_at	215185_at	216055_at	216277_at	216749_at	216503_s_at	213971_s_at	216159_s_at	217631_at	217348_x_at	215938_s_at	215358_x_at	218257_s_at	216909_at	213861_s_at
216367_at	215066_at	216133_at	216147_at	216054_x_at	216488_s_at	214415_at	217038_at	216889_s_at	215706_x_at	216125_s_at	217610_at	215679_at	215673_at	215209_at	216133_at	216282_x_at	216750_at	216582_at	213988_s_at	216188_at	217650_x_at	217350_at	216336_x_at	215373_x_at	218264_at	216976_s_at	213988_s_at
216453_at	215544_s_at	216144_at	216159_s_at	216189_at	216566_at	214592_s_at	217066_s_at	216926_s_at	215773_x_at	216609_at	217653_x_at	215685_s_at	215874_at	215248_at	216175_at	216292_at	216752_at	216607_s_at	214022_s_at	216225_at	217796_s_at	217352_at	216492_at	215977_x_at	218317_x_at	217038_at	214099_s_at
216462_at	215828_at	216161_at	216197_at	216421_at	216614_at	214697_s_at	217206_at	216938_x_at	215881_x_at	216650_at	217713_x_at	215706_x_at	216062_at	215289_at	216188_at	216873_s_at	216859_x_at	216626_at	214355_x_at	216243_s_at	217891_at	217529_at	216509_x_at	215992_s_at	218330_s_at	217044_s_at	214130_s_at
216538_at	215834_x_at	216426_at	216389_s_at	216480_x_at	216645_at	214791_at	217246_s_at	216948_at	216052_x_at	216751_at	217729_s_at	215838_at	216147_at	215372_x_at	216410_at	216920_s_at	216880_at	216747_at	214527_s_at	216349_at	217928_s_at	217574_at	216699_s_at	216052_x_at	218412_s_at	217104_at	214151_s_at
216547_at	215847_at	216530_at	216426_at	216521_s_at	216657_at	214941_s_at	217273_at	217080_s_at	216064_s_at	216803_at	217937_s_at	215990_s_at	216177_at	215622_x_at	216628_at	216944_s_at	216900_s_at	217014_s_at	214544_s_at	216398_at	217951_s_at	217627_at	216703_at	216080_s_at	218476_at	217142_at	214250_at
216809_at	215931_s_at	216563_at	216503_s_at	216915_s_at	216736_at	215063_x_at	217844_at	217165_x_at	216074_x_at	216941_s_at	217998_at	216017_s_at	216189_at	215649_s_at	216705_s_at	216947_at	216940_x_at	217042_at	214759_at	216422_at	218006_s_at	217672_x_at	216735_x_at	216449_x_at	218532_s_at	217166_at	214428_x_at
216814_at	216094_at	216595_at	216538_at	216933_x_at	217042_at	215253_s_at	218029_at	217233_at	216202_s_at	216993_s_at	218086_at	216296_at	216349_at	215705_at	216788_at	216953_s_at	217054_at	217104_at	215193_x_at	216702_x_at	218031_s_at	217715_x_at	217047_s_at	216450_x_at	218559_s_at	217177_s_at	214446_at
216882_s_at	216100_s_at	216915_s_at	216547_at	216940_x_at	217044_s_at	215605_at	218141_at	217247_at	216226_at	216997_x_at	218177_at	216511_s_at	216407_at	215778_x_at	216903_s_at	217110_s_at	217077_s_at	217136_at	215306_at	216791_at	218131_s_at	217800_s_at	217128_s_at	216867_s_at	218562_s_at	217199_s_at	214486_x_at
216924_s_at	216176_at	216920_s_at	216586_at	216958_s_at	217121_at	215910_s_at	218255_s_at	217284_x_at	216387_x_at	217212_s_at	218206_x_at	216549_s_at	216439_at	215800_at	216940_x_at	217168_s_at	217204_at	217149_x_at	215509_s_at	217000_at	218383_at	217916_s_at	217165_x_at	217168_s_at	218578_at	217203_at	214688_at
217070_at	216222_s_at	217102_at	216607_s_at	216973_s_at	217207_s_at	216014_s_at	218282_at	217293_at	216766_at	217336_at	218222_x_at	216683_at	216556_x_at	215848_at	216981_x_at	217388_s_at	217257_at	217218_at	215711_s_at	217042_at	218394_at	218248_at	217168_s_at	217312_s_at	218822_s_at	217263_x_at	214819_at
217111_at	216278_at	217127_at	216683_at	217416_x_at	217253_at	216037_x_at	218498_s_at	217304_at	216945_x_at	217353_at	218359_at	216823_at	216607_s_at	216057_at	217054_at	217498_at	217272_s_at	217253_at	215915_at	217211_at	218409_s_at	218359_at	217269_s_at	217326_x_at	218844_at	217269_s_at	214888_at
217158_at	216382_s_at	217152_at	216822_x_at	217445_s_at	217375_at	216384_x_at	218608_at	217474_at	216985_s_at	217478_s_at	218417_s_at	216871_at	216675_at	216062_at	217226_s_at	217664_at	217340_at	217274_x_at	216090_x_at	217349_s_at	218564_at	218416_s_at	217324_at	217430_x_at	218847_at	217291_at	215023_s_at
217205_at	216563_at	217165_x_at	216882_s_at	217501_at	217392_at	216791_at	218651_s_at	217559_at	217099_s_at	217605_at	218441_s_at	216919_at	217016_x_at	216188_at	217475_s_at	217730_at	217507_at	217286_s_at	216119_s_at	217548_at	218650_at	218491_s_at	217506_at	217509_x_at	218855_at	217407_x_at	215152_at
217269_s_at	216705_s_at	217173_s_at	216976_s_at	217656_at	217453_at	216988_s_at	218765_at	217574_at	217149_x_at	217847_s_at	218480_at	216992_s_at	217189_s_at	216236_s_at	217484_at	217783_s_at	217603_at	217407_x_at	216316_x_at	217653_x_at	218727_at	218833_at	217554_at	217701_x_at	218868_at	217423_at	215187_at
217291_at	216768_x_at	217284_x_at	216985_s_at	217670_at	217500_at	217028_at	218900_at	217589_at	217347_at	217987_at	218509_at	217168_s_at	217333_at	216580_at	217690_at	218194_at	217891_at	217549_at	216377_x_at	217735_s_at	218742_at	218907_s_at	217977_at	217741_s_at	218888_s_at	217433_at	215212_at
217353_at	217039_x_at	217351_at	216993_s_at	217876_at	217503_at	217200_x_at	218938_at	217659_at	217348_x_at	218050_at	218657_at	217206_at	217400_at	216813_at	217701_x_at	218322_s_at	218030_at	217662_x_at	216449_x_at	217821_s_at	218810_at	219061_s_at	218022_at	217799_x_at	218900_at	217649_at	215555_at
217437_s_at	217127_at	217490_at	217173_s_at	217935_s_at	217549_at	217291_at	218944_at	217715_x_at	217456_x_at	218116_at	218674_at	217223_s_at	217432_s_at	216814_at	218121_at	218417_s_at	218087_s_at	217765_at	216526_x_at	217991_x_at	218855_at	219092_s_at	218030_at	217825_s_at	219010_at	217684_at	215649_s_at
217481_x_at	217516_x_at	217558_at	217208_s_at	218102_at	217554_at	217408_at	219054_at	218183_at	217555_at	218121_at	218682_s_at	217239_x_at	217518_at	216985_s_at	218293_x_at	218686_s_at	218353_at	217775_s_at	216735_x_at	218359_at	218903_s_at	219094_at	218031_s_at	217853_at	219027_s_at	217692_at	215921_at
217518_at	217731_s_at	217588_at	217309_s_at	218134_s_at	217662_x_at	217548_at	219094_at	218413_s_at	217588_at	218156_s_at	218703_at	217633_at	217534_at	217028_at	218359_at	218702_at	218720_x_at	217971_at	216883_x_at	218402_s_at	218904_s_at	219127_at	218255_s_at	218018_at	219081_at	217721_at	216035_x_at
217622_at	217762_s_at	217641_at	217416_x_at	218148_at	218264_at	217622_at	219180_s_at	218674_at	217726_at	218182_s_at	218752_at	217649_at	218000_s_at	217149_x_at	218429_s_at	218807_at	218813_s_at	217998_at	216985_s_at	218413_s_at	218907_s_at	219188_s_at	218312_s_at	218041_x_at	219170_at	217799_x_at	216109_at
217696_at	217877_s_at	217643_x_at	217430_x_at	218257_s_at	218414_s_at	217645_at	219248_at	218832_x_at	217808_s_at	218266_s_at	218860_at	217654_at	218284_at	217188_s_at	218725_at	218833_at	218985_at	218070_s_at	217039_x_at	218421_at	218912_at	219298_at	218332_at	218145_at	219207_at	218183_at	216121_at
218162_at	217887_s_at	217646_at	217464_at	218302_at	218416_s_at	217677_at	219278_at	218880_at	217817_at	218341_at	218903_s_at	217678_at	218414_s_at	217212_s_at	218753_at	218943_s_at	219054_at	218510_x_at	217168_s_at	218509_at	218921_at	219314_s_at	218361_at	218178_s_at	219257_s_at	218433_at	216125_s_at
218228_s_at	217963_s_at	217783_s_at	217576_x_at	218503_at	218752_at	217783_s_at	219310_at	218995_s_at	217875_s_at	218483_s_at	218954_s_at	217793_at	218454_at	217304_at	218844_at	218954_s_at	219098_at	218673_s_at	217188_s_at	218902_at	218965_s_at	219343_at	218414_s_at	218182_s_at	219314_s_at	218504_at	216310_at
218292_s_at	218023_s_at	217878_s_at	217584_at	218572_at	219095_at	218055_s_at	219381_at	219145_at	217994_x_at	218554_s_at	219028_at	217847_s_at	218550_s_at	217403_s_at	218944_at	218976_at	219225_at	218729_at	217436_x_at	218908_at	219013_at	219353_at	218532_s_at	218208_at	219328_at	218751_s_at	216450_x_at
218326_s_at	218031_s_at	218015_s_at	217610_at	218593_at	219153_s_at	218096_at	219468_s_at	219223_at	218013_x_at	218868_at	219040_at	218145_at	218615_s_at	217416_x_at	218963_s_at	219103_at	219227_at	218813_s_at	217511_at	218927_s_at	219257_s_at	219367_s_at	218584_at	218222_x_at	219349_s_at	218808_at	216607_s_at
218621_at	218047_at	218145_at	217678_at	218763_at	219225_at	218102_at	219500_at	219503_s_at	218030_at	218971_s_at	219047_s_at	218426_s_at	218727_at	217579_x_at	218978_s_at	219190_s_at	219339_s_at	218847_at	217543_s_at	219093_at	219261_at	219513_s_at	218669_at	218405_at	219369_s_at	218814_s_at	216983_s_at
218658_s_at	218071_s_at	218234_at	217847_s_at	218978_s_at	219407_s_at	218136_s_at	219663_s_at	219550_at	218153_at	219012_s_at	219111_s_at	218615_s_at	218731_s_at	217672_x_at	219255_x_at	219270_at	219486_at	218855_at	217555_at	219103_at	219328_at	219743_at	218763_at	218429_s_at	219375_at	218874_s_at	217047_s_at
218758_s_at	218142_s_at	218325_s_at	217859_s_at	219018_s_at	219542_at	218171_at	219667_s_at	219591_at	218218_at	219111_s_at	219235_s_at	218810_at	218918_at	217681_at	219331_s_at	219377_at	219497_s_at	218910_at	217732_s_at	219205_at	219344_at	219805_at	218961_s_at	218696_at	219486_at	219438_at	217094_s_at
218790_s_at	218262_at	218376_s_at	217996_at	219043_s_at	219551_at	218193_s_at	219702_at	219601_s_at	218246_at	219116_s_at	219435_at	218880_at	219232_s_at	217757_at	219339_s_at	219496_at	219500_at	218924_s_at	217775_s_at	219209_at	219377_at	219814_at	219150_s_at	218706_s_at	219532_at	219488_at	217100_s_at
218822_s_at	218276_s_at	218778_x_at	217999_s_at	219247_s_at	219601_s_at	218284_at	219749_at	219619_at	218306_s_at	219165_at	219453_at	218925_s_at	219382_at	217776_at	219435_at	219499_at	219503_s_at	219147_s_at	217890_s_at	219248_at	219431_at	219875_s_at	219203_at	218731_s_at	219576_at	219687_at	217544_at
219015_s_at	218453_s_at	218849_s_at	218113_at	219259_at	219708_at	218355_at	219766_at	219687_at	218311_at	219178_at	219618_at	219025_at	219499_at	218352_at	219473_at	219515_at	219542_at	219172_at	218041_x_at	219282_s_at	219451_at	219949_at	219266_at	218964_at	219657_s_at	219700_at	217731_s_at
219049_at	218589_at	218858_at	218169_at	219337_at	219720_s_at	218391_at	219846_at	219708_at	218366_x_at	219477_s_at	219688_at	219256_s_at	219513_s_at	218409_s_at	219578_s_at	219578_s_at	219590_x_at	219256_s_at	218093_s_at	219411_at	219635_at	219963_at	219317_at	219054_at	219663_s_at	219707_at	217738_at
219154_at	218919_at	219434_at	218178_s_at	219376_at	219766_at	218426_s_at	219875_s_at	219817_at	218441_s_at	219488_at	219730_at	219270_at	219532_at	218434_s_at	219692_at	219600_s_at	219646_at	219376_at	218145_at	219774_at	219681_s_at	220087_at	219448_at	219077_s_at	219769_at	219735_s_at	217858_s_at
219235_s_at	219026_s_at	219437_s_at	218231_at	219447_s_at	219769_at	218516_s_at	219905_at	219847_at	218494_s_at	219556_at	219760_at	219381_at	219566_at	218466_at	219745_at	219603_s_at	219674_s_at	219410_at	218207_s_at	219811_at	219688_at	220144_s_at	219506_at	219093_at	219797_at	219769_at	217877_s_at
219287_at	219103_at	219556_at	218245_at	219475_at	219891_at	218534_s_at	219983_at	219912_s_at	218537_at	219617_at	219779_at	219601_s_at	219608_s_at	218613_at	219847_at	219640_at	219708_at	219551_at	218222_x_at	219884_at	219925_at	220208_at	219555_s_at	219218_at	219862_s_at	220154_at	218043_s_at
219379_x_at	219211_at	219637_at	218379_at	219510_at	219999_at	218647_s_at	220029_at	219944_at	218570_at	219657_s_at	219891_at	219732_at	219611_s_at	218627_at	219852_s_at	219738_s_at	219825_at	219563_at	218223_s_at	219892_at	220089_at	220212_s_at	219680_at	219271_at	219934_s_at	220210_at	218241_at
219441_s_at	219218_at	219784_at	218457_s_at	219608_s_at	220067_at	218772_x_at	220076_at	219983_at	218675_at	219676_at	220039_s_at	219738_s_at	219613_s_at	218696_at	219934_s_at	219749_at	219882_at	219680_at	218304_s_at	219919_s_at	220411_x_at	220357_s_at	219690_at	219379_x_at	220079_s_at	220227_at	218247_s_at
219577_s_at	219269_at	219807_x_at	218466_at	219742_at	220131_at	218879_s_at	220134_x_at	220077_at	218719_s_at	219680_at	220050_at	219761_at	219765_at	218760_at	220035_at	219966_x_at	219886_at	220081_x_at	218310_at	219925_at	220557_s_at	220395_at	219752_at	219474_at	220175_s_at	220268_at	218420_s_at
219609_at	219284_at	220024_s_at	218613_at	219749_at	220207_at	218924_s_at	220163_s_at	220268_at	218848_at	219708_at	220151_at	219899_x_at	219810_at	218815_s_at	220080_at	219986_s_at	219943_s_at	220207_at	218344_s_at	220012_at	220671_at	220463_at	219848_s_at	219656_at	220229_s_at	220270_at	218562_s_at
219669_at	219497_s_at	220027_s_at	218751_s_at	219751_at	220208_at	218940_at	220258_s_at	220350_at	218954_s_at	219740_at	220363_s_at	219934_s_at	219922_s_at	218927_s_at	220084_at	220012_at	219982_s_at	220354_at	218361_at	220017_x_at	220757_s_at	220560_at	219916_s_at	219657_s_at	220292_at	220325_at	218769_s_at
219844_at	219560_at	220050_at	219371_s_at	219892_at	220215_at	218978_s_at	220333_at	220427_at	219027_s_at	219749_at	220509_at	219964_at	220084_at	219020_at	220168_at	220119_at	220007_at	220476_s_at	218681_s_at	220035_at	220892_s_at	220566_at	220042_x_at	219716_at	220410_s_at	220374_at	218806_s_at
219870_at	219708_at	220116_at	219390_at	219900_s_at	220252_x_at	219003_s_at	220341_s_at	220486_x_at	219111_s_at	220021_at	220572_at	220029_at	220091_at	219075_at	220177_s_at	220126_at	220086_at	220518_at	218692_at	220165_at	220954_s_at	220653_at	220128_s_at	219759_at	220486_x_at	220453_at	218916_at
219900_s_at	219846_at	220174_at	219496_at	219905_at	220308_at	219020_at	220369_at	220490_at	219113_x_at	220091_at	220734_s_at	220031_at	220186_s_at	219222_at	220674_at	220128_s_at	220111_s_at	220606_s_at	218698_at	220219_s_at	221135_s_at	220665_at	220219_s_at	219817_at	220651_s_at	220500_s_at	218976_at
219943_s_at	219858_s_at	220256_s_at	219604_s_at	219982_s_at	220317_at	219033_at	220424_at	220529_at	219162_s_at	220097_s_at	220855_at	220054_at	220296_at	219223_at	220715_at	220157_x_at	220154_at	220869_at	218780_at	220251_at	221527_s_at	220672_at	220261_s_at	219831_at	220924_s_at	220584_at	219322_s_at
219977_at	219880_at	220388_at	219613_s_at	219998_at	220350_at	219055_at	220469_at	220542_s_at	219235_s_at	220174_at	220944_at	220114_s_at	220353_at	219358_s_at	220805_at	220219_s_at	220509_at	221164_x_at	218781_at	220344_at	221610_s_at	220774_at	220330_s_at	220041_at	220963_s_at	220824_at	219342_at
220084_at	219901_at	220448_at	219657_s_at	220004_at	220354_at	219065_s_at	220546_at	220574_at	219339_s_at	220537_at	221045_s_at	220227_at	220395_at	219629_at	220851_at	220411_x_at	220557_s_at	221167_s_at	218852_at	220374_at	221657_s_at	220795_s_at	220349_s_at	220054_at	221135_s_at	220859_at	219410_at
220128_s_at	220096_at	220512_at	219858_s_at	220033_at	220361_at	219147_s_at	220717_at	220662_s_at	219447_s_at	220549_at	221123_x_at	220266_s_at	220411_x_at	219847_at	220894_x_at	220537_at	220570_at	221195_at	219329_s_at	220560_at	221764_at	220819_at	220904_at	220086_at	221189_s_at	220877_at	219805_at
220277_at	220250_at	220516_at	220076_at	220072_at	220390_at	219157_at	220777_at	220714_at	219473_at	220797_at	221192_x_at	220283_at	220476_s_at	219891_at	220906_at	220562_at	220832_at	221221_s_at	219339_s_at	220574_at	221864_at	221045_s_at	220918_at	220254_at	221261_x_at	220908_at	219880_at
220622_at	220374_at	220517_at	220267_at	220219_s_at	220434_at	219166_at	220835_s_at	220837_at	219482_at	220823_at	221528_s_at	220366_at	220544_at	220012_at	221010_s_at	220618_s_at	220833_at	221266_s_at	219515_at	220609_at	221877_at	221058_s_at	220954_s_at	220258_s_at	221496_s_at	220938_s_at	219892_at
220716_at	220398_at	220592_at	220434_at	220411_x_at	220442_at	219318_x_at	220843_s_at	220854_at	219581_at	220941_s_at	221534_at	220374_at	220914_at	220081_x_at	221016_s_at	220641_at	220835_s_at	221318_at	219676_at	220712_at	222024_s_at	221147_x_at	221043_at	220692_at	221524_s_at	220972_s_at	220254_at
220765_s_at	220685_at	220740_s_at	220650_s_at	220453_at	220514_at	219469_at	220905_at	221035_s_at	219755_at	220962_s_at	221567_at	220388_at	220915_s_at	220157_x_at	221039_s_at	220690_s_at	220844_at	221473_x_at	219698_s_at	220744_s_at	222183_x_at	221458_at	221378_at	220725_x_at	221528_s_at	221043_at	220570_at
220915_s_at	220720_x_at	220830_at	220721_at	220526_s_at	220533_at	219752_at	221000_s_at	221146_at	219969_at	220973_s_at	221572_s_at	220512_at	221049_s_at	220306_at	221171_at	220729_at	220870_at	221485_at	219716_at	220767_at	222217_s_at	221585_at	221407_at	220738_s_at	221541_at	221120_at	220768_s_at
221060_s_at	220755_s_at	220838_at	220911_s_at	220743_at	220666_at	220048_at	221096_s_at	221240_s_at	220633_s_at	220992_s_at	221590_s_at	220557_s_at	221065_s_at	220398_at	221231_s_at	220765_s_at	220872_at	221530_s_at	219766_at	220839_at	222252_x_at	221589_s_at	221427_s_at	220843_s_at	221572_s_at	221154_at	220990_s_at
221115_s_at	220999_s_at	220954_s_at	221041_s_at	220898_at	220774_at	220122_at	221118_at	221281_at	220661_s_at	221005_s_at	221625_at	220738_s_at	221118_at	220399_at	221320_at	220841_s_at	220981_x_at	221601_s_at	219781_s_at	221063_x_at	222327_x_at	221603_at	221495_s_at	221120_at	221589_s_at	221164_x_at	221010_s_at
221165_s_at	221050_s_at	220985_s_at	221120_at	220941_s_at	220844_at	220123_at	221242_at	221296_at	220730_at	221022_s_at	221686_s_at	220776_at	221382_at	220606_s_at	221334_s_at	220987_s_at	221010_s_at	221615_at	219801_at	221077_at	222341_x_at	221627_at	221598_s_at	221249_s_at	221598_s_at	221186_at	221060_s_at
221170_at	221214_s_at	221107_at	221195_at	221015_s_at	220899_at	220199_s_at	221294_at	221375_at	220773_s_at	221115_s_at	221704_s_at	220877_at	221450_x_at	220743_at	221409_at	220993_s_at	221015_s_at	221698_s_at	219817_at	221192_x_at	222358_x_at	221727_at	221631_at	221273_s_at	221604_s_at	221236_s_at	221194_s_at
221188_s_at	221291_at	221131_at	221291_at	221094_s_at	221145_at	220397_at	221525_at	221529_s_at	221077_at	221192_x_at	221768_at	221489_s_at	221577_x_at	220835_s_at	221412_at	221131_at	221031_s_at	221765_at	219868_s_at	221308_at	32137_at	221747_at	221660_at	221602_s_at	221641_s_at	221315_s_at	221205_at
221307_at	221384_at	221134_at	221308_at	221229_s_at	221236_s_at	220489_s_at	221640_s_at	221658_s_at	221188_s_at	221236_s_at	221783_at	221682_s_at	221664_s_at	221010_s_at	221432_s_at	221274_s_at	221036_s_at	221808_at	220128_s_at	221344_at	34187_at	221865_at	221689_s_at	221730_at	221753_at	221412_at	221245_s_at
221375_at	221522_at	221188_s_at	221423_s_at	221440_s_at	221406_s_at	220606_s_at	221724_s_at	221681_s_at	221238_at	221276_s_at	221890_at	221789_x_at	221750_at	221435_x_at	221701_s_at	221471_at	221113_s_at	221851_at	220182_at	221362_at	40465_at	221874_at	221788_at	221734_at	221765_at	221646_s_at	221511_x_at
221435_x_at	221571_at	221643_s_at	221428_s_at	221601_s_at	221413_at	220730_at	221730_at	221714_s_at	221287_at	221437_s_at	222111_at	221797_at	221755_at	221577_x_at	221716_s_at	221546_at	221141_x_at	221888_at	220261_s_at	221823_at	40829_at	221889_at	221871_s_at	221830_at	221876_at	221687_s_at	221559_s_at
221556_at	221714_s_at	221750_at	221546_at	221615_at	221466_at	221230_s_at	221800_s_at	221857_s_at	221326_s_at	221513_s_at	222138_s_at	221838_at	221862_at	221611_s_at	221745_at	221686_s_at	221172_at	221939_at	220304_s_at	222041_at	41113_at	222006_at	221953_s_at	221889_at	221998_s_at	221866_at	221561_at
221575_at	221797_at	221757_at	221615_at	221637_s_at	221656_s_at	221248_s_at	221892_at	221936_x_at	221495_s_at	221770_at	222175_s_at	221841_s_at	221864_at	221750_at	221947_at	221992_at	221290_s_at	221959_at	220334_at	222048_at	43511_s_at	222159_at	221985_at	222043_at	222024_s_at	221960_s_at	221778_at
221660_at	221871_s_at	221792_at	221754_s_at	221772_s_at	221716_s_at	221524_s_at	221894_at	222062_at	221567_at	221808_at	222200_s_at	221849_s_at	221868_at	221778_at	222031_at	221997_s_at	221384_at	222068_s_at	220454_s_at	222202_at	45288_at	222185_at	222052_at	222061_at	222062_at	221997_s_at	221782_at
221665_s_at	221877_at	221920_s_at	221778_at	221893_s_at	221756_at	221568_s_at	221953_s_at	222068_s_at	221590_s_at	221815_at	222252_x_at	221947_at	221964_at	221867_at	222057_at	222094_at	221629_x_at	222160_at	220924_s_at	222240_s_at	45714_at	222360_at	222070_at	222195_s_at	222348_at	222006_at	221824_s_at
221757_at	221909_at	221973_at	221985_at	221947_at	221862_at	221596_s_at	222041_at	222112_at	221617_at	221912_s_at	222335_at	222009_at	222102_at	221897_at	222061_at	222120_at	221862_at	222295_x_at	221473_x_at	222241_at	47069_at	32540_at	222207_x_at	222237_s_at	222350_at	222061_at	221857_s_at
222057_at	222090_at	221986_s_at	221986_s_at	222208_s_at	222009_at	221749_at	222117_s_at	222238_s_at	222026_at	222026_at	222347_at	222082_at	222234_s_at	221985_at	222241_at	222137_at	221867_at	222301_at	221539_at	222284_at	48531_at	33197_at	222218_s_at	222270_at	222352_at	222096_x_at	221892_at
222060_at	222162_s_at	221988_at	222177_s_at	222304_x_at	222121_at	221763_at	222184_at	222290_at	222156_x_at	222137_at	222366_at	222114_x_at	222348_at	222108_at	222245_s_at	222145_at	221888_at	222303_at	221880_s_at	222303_at	49329_at	33579_i_at	222295_x_at	222293_at	32259_at	222136_x_at	221985_at
222265_at	222167_at	222110_at	222249_at	222380_s_at	222142_at	221802_s_at	222188_at	222300_at	222264_at	222179_at	34697_at	222218_s_at	31861_at	222193_at	222263_at	222208_s_at	221894_at	35436_at	221881_s_at	222324_at	64474_g_at	37028_at	222339_x_at	222311_s_at	32502_at	222245_s_at	221986_s_at
222272_x_at	222170_at	222111_at	222264_at	35179_at	222151_s_at	221840_at	32042_at	222349_x_at	35820_at	222191_s_at	38043_at	222268_x_at	35617_at	222300_at	222264_at	31637_s_at	222041_at	36829_at	221903_s_at	222381_at	AFFX-BioB-3_at	37831_at	36552_at	222349_x_at	34858_at	33197_at	222057_at
222295_x_at	222269_at	222150_s_at	222306_at	35776_at	222283_at	221918_at	37004_at	33304_at	38691_s_at	222270_at	38340_at	222284_at	36907_at	222304_x_at	222315_at	33322_i_at	222114_x_at	37005_at	221964_at	32137_at	AFFX-BioB-5_at	38398_at	39729_at	32094_at	36129_at	37022_at	222058_at
222350_at	222327_x_at	222185_at	222337_at	50400_at	222302_at	222256_s_at	37953_s_at	35147_at	52005_at	222290_at	41660_at	222295_x_at	37028_at	33323_r_at	31846_at	33323_r_at	222360_at	38069_at	222112_at	35150_at	AFFX-BioC-3_at	48612_at	47773_at	36545_s_at	38918_at	44040_at	222209_s_at
37152_at	35626_at	222334_at	33646_g_at	54051_at	222361_at	32540_at	51226_at	35846_at	56821_at	38340_at	47083_at	222350_at	38918_at	36499_at	32029_at	35160_at	36554_at	39854_r_at	44783_s_at	39650_s_at	AFFX-BioC-5_at	52651_at	49452_at	36711_at	46142_at	45288_at	222376_at
41469_at	39549_at	32540_at	34449_at	55065_at	32699_s_at	35147_at	53720_at	37831_at	64440_at	49485_at	55583_at	36564_at	57715_at	49049_at	33768_at	38340_at	37005_at	40148_at	63825_at	49111_at	AFFX-r2-Ec-bioB-M_at	632_at	51228_at	39548_at	47105_at	45297_at	32811_at
50965_at	65438_at	35617_at	38340_at	64900_at	38447_at	37004_at	61734_at	38241_at	65591_at	635_s_at	61297_at	37028_at	58994_at	56919_at	34063_at	40273_at	38340_at	43511_s_at	AFFX-HUMISGF3A/M97935_MA_at	49329_at	AFFX-r2-Ec-bioC-3_at	64488_at	56256_at	635_s_at	57588_at	58308_at	37943_at
52741_at	81811_at	37590_g_at	43511_s_at	81737_at	39313_at	52285_f_at	AFFX-HUMRGE/M10098_M_at	48031_r_at	79005_at	64488_at	78383_at	52651_at	64432_at	64064_at	34449_at	40640_at	38671_at	44669_at	AFFX-M27830_5_at	49679_s_at	AFFX-r2-Ec-bioC-5_at	AFFX-r2-Bs-thr-5_s_at	635_s_at	76897_s_at	81811_at	65718_at	46256_at
200612_s_at	179_at	200096_s_at	200644_at	200724_at	200961_at	1598_g_at	201222_s_at	200835_s_at	200027_at	1316_at	177_at	200056_s_at	1598_g_at	201027_s_at	1316_at	179_at	160020_at	200049_at	200017_at	200856_x_at	200677_at	1598_g_at	1487_at	179_at	200731_s_at	200601_at	200808_s_at
201228_s_at	200769_s_at	200690_at	201038_s_at	201069_at	200990_at	200648_s_at	201294_s_at	200911_s_at	200061_s_at	200742_s_at	200012_x_at	200686_s_at	201018_at	201072_s_at	201151_s_at	200646_s_at	200070_at	200623_s_at	200098_s_at	200857_s_at	200974_at	200789_at	200020_at	201080_at	200898_s_at	200675_at	201027_s_at
201236_s_at	200959_at	200874_s_at	201140_s_at	201075_s_at	201205_at	200766_at	201328_at	201008_s_at	200655_s_at	200905_x_at	200026_at	200726_at	201063_at	201085_s_at	201283_s_at	200707_at	200646_s_at	200676_s_at	200601_at	201075_s_at	201048_x_at	200835_s_at	200050_at	201299_s_at	201315_x_at	200857_s_at	201053_s_at
201319_at	201010_s_at	200964_at	201205_at	201087_at	201427_s_at	200884_at	201980_s_at	201009_s_at	200717_x_at	200917_s_at	200725_x_at	200783_s_at	201129_at	201093_x_at	201321_s_at	201017_at	201026_at	200772_x_at	200623_s_at	201087_at	201156_s_at	200906_s_at	200593_s_at	201437_s_at	201341_at	200923_at	201143_s_at
201396_s_at	201038_s_at	201069_at	201349_at	201419_at	201437_s_at	200959_at	202073_at	201010_s_at	200809_x_at	201320_at	202191_s_at	200979_at	201190_s_at	201420_s_at	201442_s_at	201083_s_at	201041_s_at	200808_s_at	200734_s_at	201234_at	201235_s_at	201039_s_at	200610_s_at	201556_s_at	201360_at	200979_at	201281_at
201465_s_at	201179_s_at	201122_x_at	201370_s_at	201455_s_at	201526_at	201040_at	202290_at	201055_s_at	200891_s_at	201759_at	202273_at	201026_at	201295_s_at	201673_s_at	201604_s_at	201143_s_at	201073_s_at	200875_s_at	200808_s_at	201447_at	201289_at	201115_at	200658_s_at	201692_at	201382_at	201276_at	201396_s_at
201507_at	201469_s_at	201168_x_at	201562_s_at	201724_s_at	201587_s_at	201073_s_at	202362_at	201101_s_at	201143_s_at	201797_s_at	202661_at	201038_s_at	201306_s_at	201728_s_at	201936_s_at	201182_s_at	201247_at	200913_at	201110_s_at	201450_s_at	201461_s_at	201158_at	200690_at	201733_at	201439_at	201360_at	201822_at
201538_s_at	201531_at	201174_s_at	201565_s_at	202067_s_at	201638_s_at	201167_x_at	202450_s_at	201340_s_at	201208_s_at	202152_x_at	202701_at	201060_x_at	201528_at	201759_at	201945_at	201202_at	201440_at	200955_at	201129_at	201461_s_at	201538_s_at	201167_x_at	200769_s_at	202115_s_at	201848_s_at	201473_at	202025_x_at
201556_s_at	201566_x_at	201181_at	201566_x_at	202249_s_at	201657_at	201221_s_at	202502_at	201702_s_at	201242_s_at	202284_s_at	202828_s_at	201177_s_at	201565_s_at	201834_at	202100_at	201223_s_at	201447_at	200956_s_at	201144_s_at	201509_at	201551_s_at	201222_s_at	200828_s_at	202152_x_at	202132_at	201625_s_at	202248_at
201888_s_at	201627_s_at	201210_at	201607_at	202281_at	201679_at	201233_at	202876_s_at	201719_s_at	201428_at	202331_at	202997_s_at	201498_at	201667_at	202115_s_at	202150_s_at	201291_s_at	201473_at	200957_s_at	201326_at	201582_at	201676_x_at	201353_s_at	200875_s_at	202183_s_at	202374_s_at	201697_s_at	202344_at
201904_s_at	201647_s_at	201282_at	201890_at	202551_s_at	201692_at	201328_at	203246_s_at	201727_s_at	201702_s_at	202439_s_at	203329_at	201566_x_at	201680_x_at	202132_at	202383_at	201312_s_at	201678_s_at	200988_s_at	201356_at	201611_s_at	201706_s_at	201396_s_at	200894_s_at	202216_x_at	202436_s_at	201811_x_at	202373_s_at
201934_at	201677_at	201370_s_at	202219_at	202629_at	201766_at	201401_s_at	203308_x_at	201879_at	201849_at	202445_s_at	203697_at	201625_s_at	201759_at	202154_x_at	202426_s_at	201314_at	201691_s_at	201017_at	201371_s_at	201651_s_at	201843_s_at	201401_s_at	200895_s_at	202249_s_at	202488_s_at	201925_s_at	202389_s_at
202103_at	201679_at	201460_at	202281_at	202672_s_at	201835_s_at	201613_s_at	203311_s_at	201942_s_at	202124_s_at	202531_at	203736_s_at	201627_s_at	201838_s_at	202255_s_at	202430_s_at	201319_at	201745_at	201050_at	201436_at	201713_s_at	201972_at	201404_x_at	201017_at	202310_s_at	202494_at	201949_x_at	202463_s_at
202118_s_at	201880_at	201572_x_at	202297_s_at	202793_at	202140_s_at	201639_s_at	203421_at	201996_s_at	202219_at	202607_at	203770_s_at	201662_s_at	201885_s_at	202316_x_at	202455_at	201326_at	201753_s_at	201111_at	201513_at	201752_s_at	202023_at	201425_at	201018_at	202326_at	202566_s_at	202026_at	202476_s_at
202459_s_at	202104_s_at	201573_s_at	202464_s_at	202849_x_at	202204_s_at	201804_x_at	203487_s_at	202049_s_at	202257_s_at	2028_s_at	203892_at	201750_s_at	201936_s_at	202338_at	202472_at	201498_at	201874_at	201114_x_at	201565_s_at	201760_s_at	202247_s_at	201465_s_at	201075_s_at	202385_s_at	202616_s_at	202103_at	202482_x_at
202518_at	202131_s_at	201604_s_at	202482_x_at	202934_at	202426_s_at	201895_at	203503_s_at	202248_at	202476_s_at	202912_at	203980_at	201791_s_at	202040_s_at	202415_s_at	202533_s_at	201555_at	201975_at	201143_s_at	201566_x_at	201990_s_at	202865_at	201856_s_at	201139_s_at	202430_s_at	202626_s_at	202131_s_at	202532_s_at
202692_s_at	202152_x_at	201755_at	202528_at	203072_at	202492_at	201945_at	203528_at	202301_s_at	202655_at	202962_at	204221_x_at	201836_s_at	202094_at	202528_at	202684_s_at	201566_x_at	202027_at	201155_s_at	201667_at	202172_at	202873_at	202007_at	201196_s_at	202450_s_at	202667_s_at	202145_at	202613_at
202756_s_at	202264_s_at	201767_s_at	202650_s_at	203130_s_at	202513_s_at	202049_s_at	203566_s_at	202307_s_at	202673_at	202996_at	204253_s_at	201906_s_at	202126_at	202586_at	202723_s_at	201687_s_at	202122_s_at	201195_s_at	201674_s_at	202345_s_at	202931_x_at	202023_at	201342_at	202513_s_at	202702_at	202253_s_at	202774_s_at
202782_s_at	202430_s_at	201797_s_at	202706_s_at	203249_at	202681_at	202161_at	203625_x_at	202354_s_at	202693_s_at	203003_at	204268_at	202034_x_at	202144_s_at	202668_at	202769_at	201813_s_at	202278_s_at	201274_at	201712_s_at	202415_s_at	202948_at	202067_s_at	201386_s_at	202532_s_at	202703_at	202260_s_at	202781_s_at
202904_s_at	202480_s_at	201979_s_at	202840_at	203263_s_at	202715_at	202204_s_at	203720_s_at	202405_at	202719_s_at	203019_x_at	204288_s_at	202159_at	202191_s_at	202692_s_at	202770_s_at	201913_s_at	202315_s_at	201316_at	201876_at	202534_x_at	203174_s_at	202075_s_at	201414_s_at	202639_s_at	202913_at	202308_at	202822_at
202951_at	202528_at	202043_s_at	202876_s_at	203285_s_at	202751_at	202347_s_at	203731_s_at	202436_s_at	202731_at	203045_at	204298_s_at	202308_at	202302_s_at	202763_at	202845_s_at	202065_s_at	202368_s_at	201421_s_at	201890_at	202557_at	203304_at	202131_s_at	201420_s_at	202653_s_at	203051_at	202364_at	202867_s_at
203056_s_at	202532_s_at	202115_s_at	203022_at	203363_s_at	202806_at	202367_at	203746_s_at	202459_s_at	202769_at	203096_s_at	204445_s_at	202314_at	202435_s_at	202801_at	202880_s_at	202115_s_at	202617_s_at	201478_s_at	201999_s_at	202774_s_at	203377_s_at	202180_s_at	201435_s_at	202791_s_at	203320_at	202381_at	202938_x_at
203188_at	202545_at	202161_at	203188_at	203388_at	202903_at	202384_s_at	203767_s_at	202463_s_at	202845_s_at	203226_s_at	204501_at	202389_s_at	202436_s_at	202839_s_at	202967_at	202203_s_at	202639_s_at	201487_at	202056_at	202779_s_at	203410_at	202210_x_at	201436_at	202805_s_at	203388_at	202389_s_at	202945_at
203337_x_at	202547_s_at	202182_at	203368_at	203419_at	202997_s_at	202518_at	203837_at	202474_s_at	203009_at	203312_x_at	204673_at	202437_s_at	202482_x_at	202852_s_at	203072_at	202248_at	202650_s_at	201489_at	202136_at	202793_at	203444_s_at	202255_s_at	201473_at	202849_x_at	203611_at	202422_s_at	202948_at
203450_at	203085_s_at	202213_s_at	203500_at	203420_at	203005_at	202556_s_at	203901_at	202549_at	203141_s_at	203402_at	204677_at	202534_x_at	202668_at	2028_s_at	203078_at	202264_s_at	202764_at	201586_s_at	202175_at	202839_s_at	203522_at	202305_s_at	201478_s_at	202876_s_at	203672_x_at	202470_s_at	202991_at
203514_at	203203_s_at	202331_at	203535_at	203490_at	203027_s_at	202621_at	204019_s_at	202730_s_at	203143_s_at	203411_s_at	204682_at	202540_s_at	202687_s_at	202979_s_at	203165_s_at	202482_x_at	202971_s_at	201604_s_at	202217_at	202883_s_at	203544_s_at	202332_at	201487_at	202924_s_at	203677_s_at	202534_x_at	203119_at
203728_at	203235_at	202395_at	203608_at	203528_at	203081_at	202643_s_at	204025_s_at	202763_at	203162_s_at	203482_at	204688_at	202773_s_at	202753_at	203056_s_at	203273_s_at	202532_s_at	203015_s_at	201611_s_at	202221_s_at	203020_at	203615_x_at	202384_s_at	201489_at	203023_at	203758_at	202749_at	203122_at
203927_at	203346_s_at	202430_s_at	203609_s_at	203592_s_at	203208_s_at	202667_s_at	204053_x_at	202970_at	203307_at	203555_at	204747_at	202807_s_at	202865_at	203183_s_at	203352_at	202534_x_at	203141_s_at	201664_at	202254_at	203090_at	203680_at	202601_s_at	201499_s_at	203085_s_at	203892_at	202801_at	203158_s_at
203962_s_at	203452_at	202577_s_at	203774_at	203623_at	203249_at	202831_at	204120_s_at	203123_s_at	203352_at	203644_s_at	204815_s_at	202830_s_at	202910_s_at	203272_s_at	203379_at	202556_s_at	203154_s_at	201674_s_at	202615_at	203094_at	203911_at	202765_s_at	201516_at	203154_s_at	203984_s_at	202806_at	203171_s_at
203989_x_at	203578_s_at	202600_s_at	203806_s_at	203652_at	203299_s_at	202924_s_at	204132_s_at	203186_s_at	203376_at	203823_at	204818_at	202872_at	202939_at	203280_at	203451_at	202562_s_at	203465_at	201795_at	202668_at	203227_s_at	203953_s_at	202781_s_at	201545_s_at	203196_at	204080_at	202970_at	203242_s_at
204090_at	203763_at	202613_at	203860_at	203709_at	203412_at	202991_at	204137_at	203276_at	203451_at	203932_at	204821_at	203162_s_at	202943_s_at	203323_at	203457_at	202600_s_at	203505_at	201797_s_at	202797_at	203253_s_at	204132_s_at	202821_s_at	201551_s_at	203206_at	204269_at	203055_s_at	203339_at
204117_at	203911_at	202650_s_at	203926_x_at	203727_at	203602_s_at	203186_s_at	204200_s_at	203299_s_at	203665_at	203942_s_at	204909_at	203188_at	202987_at	203432_at	203502_at	202619_s_at	203525_s_at	201834_at	202818_s_at	203273_s_at	204233_s_at	202864_s_at	201614_s_at	203233_at	204271_s_at	203089_s_at	203730_s_at
204160_s_at	203975_s_at	202742_s_at	203932_at	203806_s_at	203815_at	203189_s_at	204217_s_at	203369_x_at	203848_at	204136_at	205054_at	203224_at	203184_at	203442_x_at	203505_at	202840_at	203624_at	201859_at	202897_at	203330_s_at	204292_x_at	202910_s_at	201727_s_at	203268_s_at	204284_at	203207_s_at	203870_at
204261_s_at	204056_s_at	202763_at	204008_at	203884_s_at	203942_s_at	203308_x_at	204316_at	203442_x_at	203928_x_at	204270_at	205138_s_at	203225_s_at	203212_s_at	203486_s_at	203620_s_at	202848_s_at	203651_at	202008_s_at	203054_s_at	203410_at	204567_s_at	203059_s_at	201801_s_at	203271_s_at	204330_s_at	203275_at	203871_at
204298_s_at	204101_at	202830_s_at	204083_s_at	203904_x_at	203977_at	203416_at	204324_s_at	203444_s_at	203971_at	204287_at	205211_s_at	203235_at	203225_s_at	203535_at	203741_s_at	202868_s_at	203830_at	202051_s_at	203095_at	203457_at	204671_s_at	203096_s_at	201872_s_at	203317_at	204383_at	203350_at	203939_at
204313_s_at	204104_at	202850_at	204133_at	203963_at	203981_s_at	203521_s_at	204436_at	203451_at	203973_s_at	204333_s_at	205365_at	203255_at	203255_at	203589_s_at	203759_at	202971_s_at	203907_s_at	202056_at	203180_at	203500_at	204689_at	203231_s_at	201873_s_at	203495_at	204433_s_at	203366_at	204068_at
204384_at	204433_s_at	202864_s_at	204175_at	203989_x_at	204080_at	203546_at	204479_at	203467_at	204032_at	204396_s_at	205387_s_at	203310_at	203361_s_at	203608_at	203787_at	203171_s_at	203987_at	202107_s_at	203188_at	203593_at	204751_x_at	203242_s_at	201912_s_at	203500_at	204507_s_at	203392_s_at	204081_at
204435_at	204569_at	202925_s_at	204267_x_at	204063_s_at	204146_at	203577_at	204507_s_at	203479_s_at	204141_at	204413_at	205468_s_at	203505_at	203419_at	203701_s_at	203816_at	203255_at	204062_s_at	202115_s_at	203202_at	203598_s_at	204780_s_at	203249_at	201970_s_at	203589_s_at	204651_at	203581_at	204218_at
204552_at	204899_s_at	202938_x_at	204292_x_at	204081_at	204158_s_at	203592_s_at	204639_at	203504_s_at	204181_s_at	204668_at	205525_at	203544_s_at	203501_at	203754_s_at	203826_s_at	203276_at	204068_at	202256_at	203238_s_at	203718_at	204781_s_at	203300_x_at	202069_s_at	203625_x_at	204659_s_at	203598_s_at	204241_at
204619_s_at	204902_s_at	203073_at	204316_at	204108_at	204193_at	203602_s_at	204689_at	203665_at	204329_s_at	204756_at	205542_at	203586_s_at	203567_s_at	203818_s_at	203977_at	203277_at	204079_at	202369_s_at	203320_at	203933_at	204991_s_at	203374_s_at	202126_at	203696_s_at	204691_x_at	203646_at	204254_s_at
204634_at	204927_at	203176_s_at	204364_s_at	204204_at	204198_s_at	203937_s_at	204692_at	203823_at	204455_at	204781_s_at	205569_at	203644_s_at	203682_s_at	203832_at	204014_at	203289_s_at	204123_at	202372_at	203414_at	204009_s_at	204993_at	203479_s_at	202149_at	203723_at	204741_at	203773_x_at	204265_s_at
204759_at	205045_at	203183_s_at	204415_at	204230_s_at	204227_s_at	203990_s_at	204790_at	203866_at	204478_s_at	204795_at	205579_at	203650_at	203708_at	203920_at	204032_at	203362_s_at	204221_x_at	202440_s_at	203422_at	204016_at	205162_at	203499_at	202234_s_at	203845_at	204804_at	203822_s_at	204381_at
204841_s_at	205061_s_at	203196_at	204441_s_at	204329_s_at	204287_at	204029_at	204819_at	204065_at	204490_s_at	204817_at	205626_s_at	203773_x_at	203769_s_at	203976_s_at	204049_s_at	203370_s_at	204423_at	202449_s_at	203608_at	204056_s_at	205166_at	203532_x_at	202235_at	203899_s_at	204877_s_at	203840_at	204383_at
204845_s_at	205072_s_at	203202_at	204567_s_at	204421_s_at	204296_at	204065_at	204873_at	204296_at	204693_at	204925_at	205679_x_at	203840_at	203858_s_at	203994_s_at	204079_at	203379_at	204447_at	202483_s_at	203836_s_at	204084_s_at	205215_at	203533_s_at	202236_s_at	204080_at	205048_s_at	203855_at	204550_x_at
204866_at	205145_s_at	203233_at	204650_s_at	204451_at	204342_at	204081_at	204886_at	204696_s_at	204732_s_at	204950_at	205743_at	203865_s_at	204016_at	204008_at	204641_at	203396_at	204464_s_at	202566_s_at	204003_s_at	204108_at	205252_at	203683_s_at	202330_s_at	204097_s_at	205145_s_at	203926_x_at	204741_at
204877_s_at	205323_s_at	203235_at	204652_s_at	204464_s_at	204494_s_at	204140_at	204971_at	204716_at	204819_at	205023_at	205749_at	203911_at	204228_at	204033_at	204689_at	203437_at	204632_at	202645_s_at	204039_at	204181_s_at	205360_at	203959_s_at	202345_s_at	204101_at	205198_s_at	203935_at	204742_s_at
204955_at	205345_at	203243_s_at	204994_at	204635_at	204630_s_at	204147_s_at	205017_s_at	204867_at	204822_at	205035_at	205818_at	204003_s_at	204263_s_at	204133_at	204698_at	203505_at	204668_at	202690_s_at	204142_at	204272_at	205408_at	204015_s_at	202444_s_at	204148_s_at	205203_at	203956_at	204781_s_at
205060_at	205647_at	203337_x_at	205003_at	204727_at	204639_at	204180_s_at	205063_at	204929_s_at	204862_s_at	205052_at	205838_at	204010_s_at	204405_x_at	204178_s_at	204859_s_at	203646_at	204761_at	202725_at	204264_at	204449_at	205530_at	204077_x_at	202502_at	204178_s_at	205215_at	204106_at	204826_at
205066_s_at	205698_s_at	203339_at	205054_at	204729_s_at	204651_at	204275_at	205184_at	205187_at	204902_s_at	205172_x_at	205848_at	204120_s_at	204421_s_at	204282_s_at	204936_at	203956_at	204893_s_at	202753_at	204349_at	204527_at	205586_x_at	204131_s_at	202613_at	204202_at	205313_at	204120_s_at	204842_x_at
205096_at	205717_x_at	203375_s_at	205129_at	204906_at	204682_at	204276_at	205215_at	205188_s_at	204917_s_at	205425_at	205872_x_at	204159_at	204556_s_at	204284_at	204947_at	204306_s_at	205005_s_at	202779_s_at	204386_s_at	204666_s_at	205698_s_at	204191_at	202635_s_at	204241_at	205323_s_at	204129_at	204880_at
205139_s_at	205731_s_at	203422_at	205146_x_at	204919_at	204861_s_at	204306_s_at	205548_s_at	205195_at	204985_s_at	205726_at	205894_at	204172_at	204572_s_at	204403_x_at	205071_x_at	204331_s_at	205162_at	202791_s_at	204474_at	204728_s_at	205793_x_at	204193_at	202706_s_at	204300_at	205486_at	204172_at	204927_at
205164_at	205739_x_at	203427_at	205156_s_at	204925_at	204911_s_at	204383_at	205603_s_at	205316_at	205187_at	206005_s_at	205910_s_at	204176_at	204748_at	204458_at	205096_at	204355_at	205193_at	202814_s_at	204495_s_at	204729_s_at	205797_s_at	204243_at	202715_at	204415_at	205688_at	204193_at	204936_at
205250_s_at	205776_at	203451_at	205160_at	204978_at	205093_at	204473_s_at	205621_at	205398_s_at	205195_at	206019_at	205942_s_at	204183_s_at	204759_at	204573_at	205129_at	204374_s_at	205255_x_at	202870_s_at	204871_at	204886_at	205882_x_at	204257_at	202774_s_at	204441_s_at	205705_at	204281_at	205005_s_at
205260_s_at	205793_x_at	203522_at	205211_s_at	205032_at	205122_at	204555_s_at	205647_at	205457_at	205211_s_at	206088_at	205950_s_at	204244_s_at	204808_s_at	204632_at	205294_at	204558_at	205298_s_at	202911_at	205100_at	205060_at	206139_at	204294_at	202900_s_at	204494_s_at	205710_at	204303_s_at	205035_at
205281_s_at	206096_at	203682_s_at	205283_at	205062_x_at	205158_at	204559_s_at	205741_s_at	205505_at	205218_at	206308_at	205987_at	204263_s_at	204824_at	204659_s_at	205362_s_at	204572_s_at	205354_at	202953_at	205235_s_at	205197_s_at	206140_at	204335_at	202934_at	204550_x_at	205896_at	204306_s_at	205045_at
205313_at	206654_s_at	203782_s_at	205284_at	205100_at	205170_at	204756_at	205822_s_at	205555_s_at	205230_at	206405_x_at	206097_at	204314_s_at	204871_at	204695_at	205446_s_at	204603_at	205355_at	203134_at	205558_at	205362_s_at	206473_at	204463_s_at	202961_s_at	204578_at	205937_at	204401_at	205131_x_at
205315_s_at	206993_at	203805_s_at	205362_s_at	205146_x_at	205197_s_at	204768_s_at	205879_x_at	205574_x_at	205310_at	206412_at	206104_at	204316_at	204884_s_at	204738_s_at	205458_at	204650_s_at	205398_s_at	203293_s_at	205584_at	205583_s_at	206527_at	204552_at	203023_at	204698_at	205955_at	204402_at	205210_at
205327_s_at	207239_s_at	203869_at	205411_at	205222_at	205301_s_at	204769_s_at	206019_at	205727_at	205380_at	206473_at	206214_at	204405_x_at	205119_s_at	204899_s_at	205618_at	204695_at	205423_at	203392_s_at	205771_s_at	205618_at	206566_at	204702_s_at	203082_at	204727_at	206006_s_at	204544_at	205224_at
205379_at	207605_x_at	203943_at	205436_s_at	205298_s_at	205424_at	204799_at	206132_at	205731_s_at	205411_at	206483_at	206222_at	204407_at	205136_s_at	204968_at	205709_s_at	204696_s_at	205427_at	203608_at	205796_at	205716_at	206862_at	204864_s_at	203119_at	204843_s_at	206141_at	204555_s_at	205469_s_at
205466_s_at	207621_s_at	203958_s_at	205513_at	205309_at	205426_s_at	204947_at	206335_at	205749_at	205430_at	206590_x_at	206420_at	204461_x_at	205231_s_at	204977_at	205746_s_at	204770_at	205569_at	203612_at	205877_s_at	205760_s_at	206916_x_at	205032_at	203199_s_at	204972_at	206176_at	204610_s_at	205688_at
205494_at	207855_s_at	204128_s_at	205685_at	205502_at	205435_s_at	205012_s_at	206438_x_at	205787_x_at	205569_at	206594_at	206438_x_at	204555_s_at	205264_at	205060_at	205756_s_at	204873_at	205584_at	203625_x_at	205879_x_at	206003_at	206962_x_at	205121_at	203201_at	204986_s_at	206303_s_at	204635_at	205698_s_at
205499_at	207891_s_at	204146_at	205706_s_at	205706_s_at	205500_at	205078_at	206537_at	205967_at	205617_at	206687_s_at	206486_at	204573_at	205317_s_at	205061_s_at	205799_s_at	204936_at	205676_at	203626_s_at	205909_at	206461_x_at	207078_at	205197_s_at	203235_at	205010_at	206416_at	204639_at	205775_at
205574_x_at	208067_x_at	204171_at	205756_s_at	205797_s_at	205561_at	205333_s_at	207112_s_at	206021_at	205780_at	206838_at	206538_at	204614_at	205527_s_at	205131_x_at	205923_at	204949_at	205706_s_at	203696_s_at	205926_at	206544_x_at	207098_s_at	205248_at	203322_at	205250_s_at	206586_at	204675_at	205868_s_at
205645_at	208368_s_at	204211_x_at	205774_at	206090_s_at	205579_at	205382_s_at	207328_at	206053_at	205802_at	206962_x_at	206597_at	204615_x_at	205698_s_at	205284_at	205955_at	204998_s_at	205775_at	203821_at	206102_at	206613_s_at	207214_at	205266_at	203339_at	205264_at	207090_x_at	204805_s_at	206180_x_at
205709_s_at	208459_s_at	204241_at	205775_at	206186_at	205640_at	205704_s_at	207347_at	206100_at	206268_at	207117_at	206645_s_at	204781_s_at	205771_s_at	205511_at	206036_s_at	205003_at	205966_at	203856_at	206123_at	206829_x_at	207223_s_at	205323_s_at	203462_x_at	205296_at	207105_s_at	204824_at	206267_s_at
205762_s_at	208583_x_at	204275_at	205963_s_at	206374_at	205689_at	205707_at	207425_s_at	206114_at	206283_s_at	207133_x_at	206708_at	204796_at	205910_s_at	205521_at	206106_at	205004_at	206288_at	203920_at	206261_at	206874_s_at	207521_s_at	205435_s_at	203552_at	205339_at	207233_s_at	204838_s_at	206574_s_at
205808_at	208762_at	204300_at	206081_at	206448_at	205799_s_at	205748_s_at	207438_s_at	206182_at	206572_x_at	207352_s_at	206807_s_at	204825_at	205975_s_at	205536_at	206147_x_at	205224_at	206351_s_at	203923_s_at	207030_s_at	206989_s_at	207563_s_at	205437_at	203701_s_at	205362_s_at	207440_at	205059_s_at	206722_s_at
205975_s_at	208830_s_at	204423_at	206095_s_at	206516_at	205896_at	205750_at	207490_at	206520_x_at	206746_at	207425_s_at	206893_at	205073_at	206101_at	205842_s_at	206233_at	205527_s_at	206429_at	204089_x_at	207335_x_at	207069_s_at	207676_at	205455_at	203745_at	205457_at	207505_at	205203_at	207001_x_at
206039_at	208860_s_at	204447_at	206097_at	206649_s_at	206019_at	205822_s_at	207495_at	206521_s_at	206858_s_at	207492_at	206908_s_at	205225_at	206594_at	205855_at	206288_at	205760_s_at	206662_at	204241_at	207417_s_at	207115_x_at	207734_at	205575_at	203832_at	205462_s_at	207595_s_at	205223_at	207088_s_at
206081_at	208920_at	204492_at	206147_x_at	206962_x_at	206032_at	205854_at	207540_s_at	207012_at	206907_at	207518_at	207205_at	205296_at	207143_at	206092_x_at	206378_at	205769_at	206855_s_at	204379_s_at	207707_s_at	207239_s_at	207904_s_at	205625_s_at	203852_s_at	205661_s_at	207684_at	205420_at	208056_s_at
206429_at	209110_s_at	204498_s_at	206288_at	207183_at	206090_s_at	206053_at	207655_s_at	207435_s_at	207013_s_at	208054_at	207273_at	205370_x_at	207490_at	206565_x_at	206507_at	205865_at	206998_x_at	204507_s_at	207760_s_at	207937_x_at	208101_s_at	205689_at	203931_s_at	205762_s_at	207686_s_at	205641_s_at	208114_s_at
206526_at	209131_s_at	204703_at	206480_at	207239_s_at	206092_x_at	206483_at	207712_at	207740_s_at	207231_at	208091_s_at	207326_at	205425_at	207518_at	206788_s_at	206590_x_at	205967_at	207002_s_at	204514_at	208094_s_at	208158_s_at	208174_x_at	205731_s_at	203933_at	205887_x_at	207734_at	205748_s_at	208373_s_at
206542_s_at	209328_x_at	204842_x_at	206519_x_at	207266_x_at	206132_at	206686_at	207737_at	208328_s_at	207264_at	208121_s_at	207366_at	205440_s_at	207594_s_at	207088_s_at	206632_s_at	206087_x_at	207031_at	204603_at	208112_x_at	208393_s_at	208229_at	205924_at	203941_at	205967_at	207904_s_at	205791_x_at	208712_at
206667_s_at	209370_s_at	204947_at	206548_at	207591_s_at	206277_at	206723_s_at	207749_s_at	208424_s_at	207357_s_at	208200_at	207426_s_at	205774_at	207734_at	207513_s_at	206668_s_at	206100_at	207180_s_at	204835_at	208154_at	208844_at	208249_s_at	206194_at	204003_s_at	206044_s_at	208076_at	206472_s_at	208730_x_at
206722_s_at	209512_at	205004_at	206650_at	208588_at	206546_at	206777_s_at	207871_s_at	208478_s_at	207518_at	208216_at	207446_at	205775_at	207746_at	207891_s_at	206686_at	206500_s_at	207357_s_at	204990_s_at	208296_x_at	208940_at	208310_s_at	206357_at	204029_at	206139_at	208248_x_at	206492_at	208823_s_at
206756_at	209532_at	205091_x_at	206855_s_at	208860_s_at	206613_s_at	206855_s_at	208031_s_at	208621_s_at	207540_s_at	208255_s_at	207521_s_at	205904_at	207759_s_at	208067_x_at	206900_x_at	206900_x_at	207495_at	204998_s_at	208390_s_at	208945_s_at	208407_s_at	206499_s_at	204128_s_at	206169_x_at	208390_s_at	206507_at	208906_at
206847_s_at	209533_s_at	205333_s_at	207033_at	208947_s_at	206747_at	206900_x_at	208055_s_at	208719_s_at	207712_at	208268_at	207554_x_at	205968_at	207919_at	208114_s_at	206951_at	207115_x_at	207688_s_at	205004_at	208540_x_at	209005_at	208430_s_at	206521_s_at	204133_at	206176_at	208478_s_at	207061_at	208914_at
206936_x_at	209547_s_at	205508_at	207045_at	209152_s_at	206782_s_at	207239_s_at	208063_s_at	208735_s_at	207727_s_at	208553_at	207591_s_at	206020_at	208047_s_at	208141_s_at	207133_x_at	207188_at	207821_s_at	205034_at	208651_x_at	209020_at	208588_at	206848_at	204147_s_at	206351_s_at	208730_x_at	207391_s_at	208954_s_at
207014_at	209575_at	205771_s_at	207183_at	209175_at	207020_at	207309_at	208119_s_at	208793_x_at	207835_at	208769_at	207665_at	206114_at	208107_s_at	208328_s_at	207219_at	207291_at	208076_at	205119_s_at	208814_at	209041_s_at	208879_x_at	206902_s_at	204266_s_at	206565_x_at	208806_at	207440_at	208971_at
207037_at	209625_at	205873_at	207194_s_at	209211_at	207159_x_at	207400_at	208306_x_at	208930_s_at	208033_s_at	208935_s_at	207803_s_at	206140_at	208109_s_at	208420_x_at	207247_s_at	207986_x_at	208137_x_at	205364_at	208873_s_at	209057_x_at	208917_x_at	206965_at	204305_at	206572_x_at	208989_s_at	207556_s_at	209057_x_at
207394_at	209657_s_at	205975_s_at	207390_s_at	209262_s_at	207309_at	207782_s_at	208310_s_at	208940_at	208103_s_at	209105_at	207879_at	206247_at	208580_x_at	208430_s_at	207283_at	208159_x_at	208229_at	205436_s_at	208900_s_at	209117_at	208980_s_at	207296_at	204347_at	206929_s_at	209158_s_at	207601_at	209093_s_at
207808_s_at	209838_at	206055_s_at	207494_s_at	209352_s_at	207334_s_at	207831_x_at	208368_s_at	208960_s_at	208119_s_at	209111_at	207981_s_at	206469_x_at	208701_at	208541_x_at	207347_at	208595_s_at	208368_s_at	205527_s_at	208939_at	209149_s_at	208997_s_at	207345_at	204383_at	206949_s_at	209171_at	208042_at	209135_at
208576_s_at	209936_at	206180_x_at	207746_at	209375_at	207355_at	207929_at	208384_s_at	209041_s_at	208616_s_at	209133_s_at	208216_at	206942_s_at	208935_s_at	208624_s_at	207439_s_at	208712_at	208862_s_at	205744_at	208999_at	209281_s_at	209021_x_at	207824_s_at	204426_at	207608_x_at	209341_s_at	208118_x_at	209176_at
208588_at	209941_at	206263_at	208068_x_at	209413_at	207824_s_at	207999_s_at	208430_s_at	209102_s_at	208679_s_at	209235_at	208331_at	206949_s_at	209147_s_at	208712_at	207559_s_at	208741_at	209321_s_at	206086_x_at	209013_x_at	209412_at	209034_at	208322_s_at	204427_s_at	207730_x_at	209354_at	208328_s_at	209246_at
208707_at	210005_at	206364_at	208159_x_at	209499_x_at	208291_s_at	208118_x_at	208466_at	209136_s_at	208732_at	209311_at	208439_s_at	206994_at	209310_s_at	208730_x_at	207761_s_at	208810_at	209354_at	206347_at	209065_at	209534_x_at	209093_s_at	208425_s_at	204506_at	208003_s_at	209379_s_at	208430_s_at	209263_x_at
208844_at	210160_at	206583_at	208373_s_at	209517_s_at	208381_s_at	208371_s_at	208612_at	209282_at	208850_s_at	209508_x_at	208493_at	207165_at	209702_at	208814_at	207827_x_at	208815_x_at	209378_s_at	206466_at	209067_s_at	209648_x_at	209279_s_at	208478_s_at	204647_at	208099_x_at	209455_at	209037_s_at	209370_s_at
209082_s_at	210180_s_at	206752_s_at	208676_s_at	209532_at	208466_at	208490_x_at	208715_at	209547_s_at	208859_s_at	209599_s_at	208524_at	207267_s_at	209725_at	208903_at	207836_s_at	208817_at	209425_at	206499_s_at	209068_at	209698_at	209294_x_at	208541_x_at	205136_s_at	208101_s_at	209518_at	209135_at	209381_x_at
209170_s_at	210405_x_at	206848_at	208804_s_at	209536_s_at	208748_s_at	208541_x_at	208844_at	209592_s_at	209155_s_at	209822_s_at	208692_at	207414_s_at	209729_at	208917_x_at	208276_at	208938_at	209451_at	206688_s_at	209075_s_at	209704_at	209326_at	208741_at	205543_at	208490_x_at	209532_at	209267_s_at	209439_s_at
209294_x_at	210443_x_at	206967_at	208912_s_at	209561_at	208806_at	208751_at	208980_s_at	209676_at	209193_at	209913_x_at	208844_at	207761_s_at	209745_at	208953_at	208390_s_at	208973_at	209461_x_at	206845_s_at	209161_at	209832_s_at	209339_at	208869_s_at	205748_s_at	208511_at	209635_at	209271_at	209622_at
209505_at	210567_s_at	207057_at	209077_at	209747_at	209016_s_at	208765_s_at	208987_s_at	209682_at	209204_at	209994_s_at	208850_s_at	207813_s_at	209812_x_at	209099_x_at	208466_at	209067_s_at	209497_s_at	207153_s_at	209250_at	209865_at	209391_at	209040_s_at	205763_s_at	208583_x_at	209674_at	209358_at	209665_at
209525_at	210582_s_at	207233_s_at	209123_at	209782_s_at	209067_s_at	208786_s_at	209030_s_at	209746_s_at	209205_s_at	210034_s_at	208868_s_at	208050_s_at	209892_at	209175_at	208511_at	209135_at	209561_at	207243_s_at	209311_at	209898_x_at	209407_s_at	209055_s_at	205873_at	208762_at	209726_at	209662_at	209685_s_at
209543_s_at	210678_s_at	207291_at	209447_at	209923_s_at	209195_s_at	208823_s_at	209135_at	209805_at	209501_at	210136_at	209070_s_at	208137_x_at	209948_at	209252_at	208810_at	209137_s_at	209624_s_at	207941_s_at	209317_at	210105_s_at	209424_s_at	209262_s_at	205895_s_at	208817_at	209733_at	209827_s_at	209741_x_at
209818_s_at	210734_x_at	208101_s_at	209516_at	209945_s_at	209291_at	208874_x_at	209157_at	209837_at	209518_at	210139_s_at	209167_at	208647_at	210145_at	209284_s_at	208831_x_at	209273_s_at	209625_at	207950_s_at	209381_x_at	210114_at	209487_at	209534_x_at	205926_at	209041_s_at	209751_s_at	209832_s_at	209777_s_at
209894_at	210800_at	208151_x_at	209527_at	210059_s_at	209334_s_at	208977_x_at	209185_s_at	209839_at	209530_at	210158_at	209278_s_at	208859_s_at	210384_at	209328_x_at	208926_at	209321_s_at	209701_at	208006_at	209398_at	210132_at	209602_s_at	209611_s_at	206050_s_at	209215_at	209791_at	209935_at	209899_s_at
210002_at	210892_s_at	208289_s_at	209532_at	210109_at	209361_s_at	209056_s_at	209204_at	210189_at	209538_at	210230_at	209335_at	208955_at	210434_x_at	209478_at	209061_at	209511_at	209826_at	208313_s_at	209547_s_at	210223_s_at	209751_s_at	209716_at	206055_s_at	209282_at	209811_at	210040_at	210050_at
210020_x_at	210916_s_at	208315_x_at	209543_s_at	210214_s_at	209425_at	209078_s_at	209322_s_at	210220_at	209563_x_at	210524_x_at	209405_s_at	209146_at	210822_at	209512_at	209152_s_at	209622_at	209833_at	208369_s_at	209643_s_at	210361_s_at	209773_s_at	209730_at	206067_s_at	209494_s_at	209833_at	210175_at	210120_s_at
210186_s_at	211432_s_at	208373_s_at	209567_at	210278_s_at	209487_at	209090_s_at	209363_s_at	210384_at	209590_at	210528_at	209830_s_at	209153_s_at	210985_s_at	209595_at	209227_at	209777_s_at	209967_s_at	208776_at	209684_at	210734_x_at	209806_at	209736_at	206092_x_at	209527_at	209921_at	210220_at	210417_s_at
210269_s_at	211528_x_at	208384_s_at	209623_at	210457_x_at	209571_at	209107_x_at	209462_at	210612_s_at	209631_s_at	210584_s_at	209866_s_at	209484_s_at	211235_s_at	209622_at	209380_s_at	210054_at	209996_x_at	208814_at	209770_at	210916_s_at	209837_at	209770_at	206499_s_at	209544_at	210233_at	210269_s_at	210758_at
210469_at	211774_s_at	208390_s_at	209667_at	210527_x_at	209651_at	209129_at	209568_s_at	210778_s_at	209633_at	210587_at	209942_x_at	209515_s_at	211262_at	209625_at	209381_x_at	210415_s_at	210175_at	208885_at	209773_s_at	211081_s_at	209838_at	209878_s_at	206747_at	209551_at	210251_s_at	210552_s_at	211042_x_at
210496_at	212027_at	208433_s_at	209729_at	210531_at	209676_at	209239_at	209651_at	210807_s_at	209837_at	210611_s_at	209957_s_at	209519_at	211435_at	209711_at	209438_at	210544_s_at	210191_s_at	208892_s_at	209777_s_at	211168_s_at	209872_s_at	209946_at	206936_x_at	209910_at	210314_x_at	210622_x_at	211160_x_at
210612_s_at	212147_at	208619_at	210001_s_at	210651_s_at	209730_at	209275_s_at	209892_at	210808_s_at	210465_s_at	210693_at	210119_at	209695_at	211572_s_at	209788_s_at	209451_at	210625_s_at	210358_x_at	208939_at	209808_x_at	211252_x_at	209925_at	210093_s_at	207391_s_at	209922_at	210457_x_at	210946_at	211250_s_at
210695_s_at	212366_at	208676_s_at	210047_at	210666_at	210021_s_at	209464_at	209972_s_at	210822_at	210476_s_at	210734_x_at	210174_at	209717_at	211576_s_at	209790_s_at	209463_s_at	210734_x_at	210387_at	208940_at	209919_x_at	211317_s_at	209947_at	210109_at	207515_s_at	210011_s_at	210529_s_at	211033_s_at	211280_s_at
210778_s_at	212450_at	208807_s_at	210212_x_at	210910_s_at	210237_at	209466_x_at	210120_s_at	210943_s_at	210493_s_at	210791_s_at	210247_at	209726_at	211973_at	209916_at	209533_s_at	210811_s_at	210407_at	208954_s_at	209972_s_at	211370_s_at	209989_at	210180_s_at	207622_s_at	210062_s_at	210531_at	211172_x_at	211982_x_at
210940_s_at	212556_at	208920_at	210499_s_at	210961_s_at	210346_s_at	209607_x_at	210288_at	211074_at	210517_s_at	210844_x_at	210538_s_at	209935_at	212111_at	210059_s_at	209551_at	211584_s_at	210443_x_at	208974_x_at	210266_s_at	211387_x_at	210001_s_at	210201_x_at	207740_s_at	210417_s_at	210613_s_at	211600_at	212023_s_at
210954_s_at	212593_s_at	208938_at	210539_at	211012_s_at	210694_s_at	209731_at	210300_at	211085_s_at	210534_s_at	211086_x_at	210600_s_at	210112_at	212118_at	210175_at	209607_x_at	211622_s_at	210539_at	209017_s_at	210826_x_at	211493_x_at	210130_s_at	210210_at	208152_s_at	210458_s_at	210688_s_at	211721_s_at	212087_s_at
211019_s_at	212616_at	209003_at	210793_s_at	211014_s_at	210845_s_at	209878_s_at	210556_at	211495_x_at	210568_s_at	211088_s_at	210659_at	210130_s_at	212134_at	210180_s_at	209624_s_at	211713_x_at	210627_s_at	209127_s_at	210871_x_at	211515_s_at	210253_at	210304_at	208447_s_at	210667_s_at	210796_x_at	211762_s_at	212104_s_at
211313_s_at	212649_at	209005_at	210986_s_at	211017_s_at	210870_s_at	210120_s_at	210633_x_at	211575_s_at	211012_s_at	211105_s_at	210812_at	210157_at	212157_at	210233_at	209646_x_at	211752_s_at	210733_at	209235_at	211042_x_at	211566_x_at	210300_at	210306_at	208644_at	210829_s_at	210826_x_at	212014_x_at	212256_at
211421_s_at	212858_at	209041_s_at	211042_x_at	211034_s_at	210874_s_at	210247_at	210776_x_at	211580_s_at	211113_s_at	211143_x_at	210894_s_at	210233_at	212182_at	210415_s_at	209684_at	211774_s_at	210775_x_at	209321_s_at	211168_s_at	211713_x_at	210361_s_at	210514_x_at	208740_at	211454_x_at	210912_x_at	212025_s_at	212280_x_at
211456_x_at	212924_s_at	209255_at	211051_s_at	211042_x_at	210935_s_at	210276_s_at	210796_x_at	211668_s_at	211429_s_at	211159_s_at	210945_at	210237_at	212362_at	210473_s_at	209920_at	211993_at	210866_s_at	209427_at	211535_s_at	211952_at	210410_s_at	210544_s_at	208799_at	211698_at	210947_s_at	212045_at	212303_x_at
211465_x_at	212927_at	209712_at	211235_s_at	211059_s_at	211097_s_at	210567_s_at	210819_x_at	211833_s_at	211514_at	211218_at	211095_at	210358_x_at	212382_at	210544_s_at	210180_s_at	212015_x_at	211028_s_at	209478_at	211584_s_at	212060_at	210418_s_at	210658_s_at	208810_at	211715_s_at	210999_s_at	212090_at	212317_at
211586_s_at	212963_at	209799_at	211576_s_at	211200_s_at	211139_s_at	210620_s_at	211004_s_at	211918_x_at	211596_s_at	211424_x_at	211171_s_at	210633_x_at	212424_at	210622_x_at	210188_at	212025_s_at	211033_s_at	209635_at	211921_x_at	212090_at	210480_s_at	210665_at	208811_s_at	211851_x_at	211004_s_at	212104_s_at	212318_at
212097_at	212964_at	209811_at	211754_s_at	211433_x_at	211348_s_at	210644_s_at	211140_s_at	211930_at	211782_at	211468_s_at	211193_at	210686_x_at	212425_at	210739_x_at	210249_s_at	212060_at	211143_x_at	209916_at	212037_at	212127_at	210633_x_at	210689_at	208814_at	212005_at	211014_s_at	212212_s_at	212332_at
212104_s_at	213019_at	209852_x_at	211774_s_at	211504_x_at	211552_s_at	210651_s_at	211237_s_at	211944_at	212113_at	211732_x_at	211254_x_at	210694_s_at	212533_at	210791_s_at	210299_s_at	212088_at	211168_s_at	209932_s_at	212064_x_at	212150_at	210635_s_at	210693_at	208828_at	212027_at	211022_s_at	212490_at	212364_at
212241_at	213046_at	209910_at	212098_at	211538_s_at	211573_x_at	210686_x_at	211366_x_at	212127_at	212132_at	211781_x_at	211282_x_at	211022_s_at	212548_s_at	210866_s_at	210415_s_at	212198_s_at	211764_s_at	209965_s_at	212087_s_at	212179_at	210788_s_at	210714_at	208863_s_at	212045_at	211233_x_at	212497_at	212365_at
212256_at	213180_s_at	209929_s_at	212170_at	212045_at	211673_s_at	210706_s_at	211426_x_at	212249_at	212336_at	211914_x_at	211487_x_at	211200_s_at	212608_s_at	210947_s_at	210568_s_at	212200_at	212004_at	210054_at	212382_at	212186_at	210807_s_at	210762_s_at	208897_s_at	212220_at	211260_at	212507_at	212490_at
212382_at	213244_at	209964_s_at	212299_at	212064_x_at	211783_s_at	210720_s_at	211433_x_at	212299_at	212338_at	212001_at	211551_at	211208_s_at	212649_at	211235_s_at	210630_s_at	212201_at	212074_at	210492_at	212383_at	212311_at	210816_s_at	210800_at	208915_s_at	212316_at	211444_at	212603_at	212563_at
212423_at	213364_s_at	210005_at	212380_at	212193_s_at	212026_s_at	210933_s_at	211792_s_at	212390_at	212340_at	212102_s_at	211567_at	211392_s_at	212760_at	211374_x_at	210760_x_at	212297_at	212134_at	210567_s_at	212424_at	212384_at	211019_s_at	211126_s_at	208938_at	212319_at	211657_at	212637_s_at	212567_s_at
212497_at	213420_at	210320_s_at	212404_s_at	212256_at	212077_at	211037_s_at	211907_s_at	212439_at	212533_at	212404_s_at	211809_x_at	211708_s_at	212770_at	211450_s_at	210778_s_at	212318_at	212198_s_at	210625_s_at	212434_at	212418_at	211073_x_at	211323_s_at	209120_at	212326_at	211781_x_at	212778_at	212627_s_at
212649_at	213470_s_at	210514_x_at	212456_at	212260_at	212170_at	211105_s_at	212047_s_at	212443_at	212570_at	212630_at	211865_s_at	211713_x_at	213007_at	211985_s_at	210812_at	212384_at	212301_at	210692_s_at	212480_at	212431_at	211088_s_at	211454_x_at	209157_at	212424_at	211833_s_at	212812_at	212674_s_at
212650_at	213520_at	210582_s_at	212559_at	212286_at	212172_at	211252_x_at	212179_at	212477_at	212823_s_at	212844_at	212157_at	211959_at	213087_s_at	212061_at	210849_s_at	212423_at	212349_at	210793_s_at	212490_at	212467_at	211162_x_at	211573_x_at	209181_s_at	212437_at	212103_at	212818_s_at	212744_at
212717_at	213552_at	210811_s_at	212674_s_at	212302_at	212325_at	211299_s_at	212241_at	212683_at	212942_s_at	212879_x_at	212182_at	212095_s_at	213156_at	212214_at	210954_s_at	212518_at	212443_at	211014_s_at	212520_s_at	212615_at	211235_s_at	211599_x_at	209233_at	212520_s_at	212286_at	212920_at	212787_at
212733_at	213629_x_at	211250_s_at	212846_at	212383_at	212381_at	211313_s_at	212255_s_at	212743_at	212968_at	212948_at	212327_at	212142_at	213167_s_at	212242_at	210994_x_at	212739_s_at	212494_at	211085_s_at	212569_at	212678_at	211280_s_at	211668_s_at	209511_at	212553_at	212303_x_at	212989_at	213028_at
212767_at	213659_at	211444_at	212872_s_at	212390_at	212484_at	211366_x_at	212257_s_at	212744_at	212984_at	212957_s_at	212466_at	212172_at	213184_at	212452_x_at	211213_at	212767_at	212497_at	211117_x_at	212598_at	212733_at	211392_s_at	211797_s_at	209518_at	212583_at	212452_x_at	213007_at	213052_at
212921_at	213710_s_at	211774_s_at	212882_at	212450_at	212589_at	211386_at	212406_s_at	212760_at	213233_s_at	213057_at	212707_s_at	212272_at	213213_at	212570_at	211692_s_at	212969_x_at	212525_s_at	211136_s_at	212608_s_at	212772_s_at	211580_s_at	211809_x_at	209567_at	212669_at	212528_at	213045_at	213055_at
212969_x_at	213786_at	211779_x_at	213075_at	212494_at	212651_at	211515_s_at	212509_s_at	212777_at	213248_at	213141_at	212806_at	212274_at	213249_at	212574_x_at	212000_at	212996_s_at	212598_at	211168_s_at	212646_at	212777_at	212012_at	211862_x_at	209669_s_at	212706_at	212565_at	213062_at	213178_s_at
212981_s_at	213842_x_at	212023_s_at	213076_at	212516_at	212717_at	211543_s_at	212559_at	212834_at	213281_at	213216_at	212819_at	212374_at	213250_at	212608_s_at	212086_x_at	213206_at	212705_x_at	211271_x_at	212675_s_at	212918_at	212233_at	211930_at	209717_at	212739_s_at	212567_s_at	213063_at	213201_s_at
213103_at	213879_at	212046_x_at	213234_at	212533_at	212759_s_at	211561_x_at	212574_x_at	212886_at	213298_at	213359_at	212923_s_at	212523_s_at	213409_s_at	212645_x_at	212102_s_at	213216_at	212717_at	211660_at	212753_at	212934_at	212255_s_at	212003_at	210005_at	212786_at	212594_at	213092_x_at	213303_x_at
213153_at	214041_x_at	212060_at	213302_at	212608_s_at	212774_at	211572_s_at	212608_s_at	213213_at	213412_at	213552_at	213004_at	212622_at	213413_at	212649_at	212299_at	213244_at	212744_at	211714_x_at	212766_s_at	213007_at	212311_at	212036_s_at	210008_s_at	212804_s_at	212710_at	213140_s_at	213523_at
213286_at	214057_at	212075_s_at	213374_x_at	212780_at	212839_s_at	211681_s_at	212678_at	213272_s_at	213428_s_at	213650_at	213033_s_at	212633_at	213427_at	212653_s_at	212364_at	213336_at	212779_at	211784_s_at	212801_at	213028_at	212431_at	212086_x_at	210042_s_at	212808_at	212811_x_at	213230_at	213615_at
213323_s_at	214100_x_at	212078_s_at	213459_at	212908_at	212914_at	211781_x_at	212736_at	213329_at	213532_at	213728_at	213048_s_at	212848_s_at	213434_at	212745_s_at	212373_at	213578_at	212812_at	211917_s_at	212885_at	213073_at	212594_at	212173_at	210175_at	213248_at	212849_at	213372_at	213634_s_at
213363_at	214291_at	212159_x_at	213460_x_at	212913_at	212968_at	211793_s_at	212818_s_at	213470_s_at	213600_at	214066_x_at	213060_s_at	212879_x_at	213507_s_at	212940_at	212642_s_at	213610_s_at	212864_at	211984_at	212888_at	213118_at	212845_at	212266_s_at	210338_s_at	213264_at	212968_at	213402_at	213646_x_at
213501_at	214383_x_at	212170_at	213542_at	213018_at	213002_at	211799_x_at	212901_s_at	213575_at	213658_at	214121_x_at	213066_at	212917_x_at	213523_at	213079_at	212930_at	213632_at	212900_at	212037_at	212981_s_at	213242_x_at	213057_at	212393_at	210691_s_at	213272_s_at	213002_at	213452_at	213858_at
213542_at	214444_s_at	212236_x_at	213553_x_at	213034_at	213130_at	212025_s_at	212942_s_at	213582_at	213686_at	214166_at	213080_x_at	212927_at	213657_s_at	213159_at	212960_at	213838_at	212902_at	212054_x_at	212996_s_at	213281_at	213081_at	212482_at	210983_s_at	213297_at	213115_at	213469_at	214080_x_at
213584_s_at	214463_x_at	212302_at	213582_at	213057_at	213191_at	212049_at	213025_at	213585_s_at	213928_s_at	214197_s_at	213106_at	212928_at	213666_at	213196_at	212968_at	213906_at	212936_at	212139_at	213124_at	213457_at	213118_at	212486_s_at	211016_x_at	213336_at	213234_at	213481_at	214170_x_at
213698_at	214483_s_at	212394_at	213593_s_at	213066_at	213270_at	212171_x_at	213045_at	213593_s_at	213954_at	214251_s_at	213252_at	212981_s_at	213720_s_at	213291_s_at	212981_s_at	213912_at	212968_at	212280_x_at	213188_s_at	213526_s_at	213172_at	212684_at	211090_s_at	213344_s_at	213236_at	213560_at	214201_x_at
213883_s_at	214590_s_at	212491_s_at	213632_at	213083_at	213278_at	212172_at	213069_at	213998_s_at	213963_s_at	214375_at	213277_at	213251_at	213757_at	213333_at	213022_s_at	213926_s_at	212989_at	212285_s_at	213331_s_at	213561_at	213208_at	212717_at	211337_s_at	213367_at	213287_s_at	213587_s_at	214322_at
213913_s_at	214717_at	212530_at	213639_s_at	213270_at	213280_at	212303_x_at	213307_at	214008_at	214229_at	214459_x_at	213350_at	213269_at	213804_at	213449_at	213045_at	213956_at	213092_x_at	212329_at	213372_at	213648_at	213364_s_at	213109_at	211392_s_at	213505_s_at	213299_at	213626_at	214372_x_at
213944_x_at	214943_s_at	212638_s_at	213742_at	213325_at	213403_at	212347_x_at	213404_s_at	214116_at	214335_at	214473_x_at	213356_x_at	213275_x_at	213813_x_at	213523_at	213054_at	213989_x_at	213159_at	212424_at	213483_at	213653_at	213568_at	213221_s_at	211599_x_at	213509_x_at	213333_at	213650_at	214588_s_at
213978_at	214975_s_at	212646_at	213822_s_at	213341_at	213426_s_at	212431_at	213475_s_at	214212_x_at	214440_at	214526_x_at	213436_at	213306_at	213819_s_at	213527_s_at	213178_s_at	214080_x_at	213212_x_at	212430_at	213506_at	213761_at	213618_at	213280_at	211681_s_at	213521_at	213551_x_at	213681_at	214752_x_at
213996_at	215159_s_at	212660_at	214120_at	213370_s_at	213428_s_at	212438_at	213585_s_at	214322_at	214474_at	214682_at	213439_x_at	213336_at	213833_x_at	213889_at	213258_at	214202_at	213227_at	212434_at	213523_at	213788_s_at	213657_s_at	213426_s_at	211686_s_at	213753_x_at	213587_s_at	213739_at	214760_at
214019_at	215195_at	212738_at	214224_s_at	213413_at	213433_at	212491_s_at	213733_at	214481_at	214519_s_at	214686_at	213495_s_at	213365_at	213877_x_at	213929_at	213389_at	214332_s_at	213242_x_at	212489_at	213600_at	213795_s_at	213689_x_at	213520_at	211864_s_at	213851_at	213600_at	213844_at	214879_x_at
214398_s_at	215404_x_at	212751_at	214230_at	213473_at	213471_at	212505_s_at	213804_at	214499_s_at	214566_at	214753_at	213537_at	213571_s_at	213891_s_at	213944_x_at	213403_at	214427_at	213243_at	212579_at	213720_s_at	213878_at	213986_s_at	213523_at	211949_s_at	214016_s_at	213665_at	214041_x_at	214986_x_at
214473_x_at	215600_x_at	212895_s_at	214231_s_at	213622_at	213492_at	212574_x_at	213840_s_at	214537_at	214614_at	214791_at	213588_x_at	213572_s_at	213893_x_at	214011_s_at	213444_at	214474_at	213341_at	212656_at	213902_at	213879_at	214008_at	213577_at	212009_s_at	214041_x_at	214019_at	214193_s_at	214991_s_at
214500_at	215825_at	213092_x_at	214241_at	213660_s_at	213615_at	212596_s_at	213853_at	214596_at	214633_at	214816_x_at	213596_at	213577_at	213907_at	214036_at	213502_x_at	214484_s_at	213389_at	212767_at	213929_at	213918_s_at	214190_x_at	213672_at	212018_s_at	214080_x_at	214116_at	214398_s_at	215043_s_at
214525_x_at	215855_s_at	213119_at	214256_at	213669_at	213649_at	212658_at	213872_at	214802_at	214674_at	215083_at	213731_s_at	213610_s_at	213971_s_at	214037_s_at	213527_s_at	214682_at	213393_at	212808_at	214113_s_at	214002_at	214266_s_at	213724_s_at	212168_at	214148_at	214263_x_at	214707_x_at	215068_s_at
214679_x_at	215888_at	213134_x_at	214260_at	213724_s_at	213686_at	212786_at	213988_s_at	214807_at	214706_at	215159_s_at	213816_s_at	213660_s_at	213982_s_at	214114_x_at	213539_at	214711_at	213463_s_at	212894_at	214124_x_at	214009_at	214300_s_at	213807_x_at	212211_at	214196_s_at	214428_x_at	214757_at	215114_at
214713_at	215954_s_at	213229_at	214335_at	213843_x_at	213728_at	212809_at	214009_at	214965_at	214790_at	215206_at	213819_s_at	213743_at	214005_at	214202_at	213659_at	214742_at	213471_at	212915_at	214202_at	214449_s_at	214310_s_at	213819_s_at	212422_at	214198_s_at	214440_at	214934_at	215195_at
214734_at	215992_s_at	213236_at	214375_at	213854_at	213785_at	212879_x_at	214048_at	214986_x_at	214792_x_at	215281_x_at	213826_s_at	213786_at	214008_at	214463_x_at	213691_at	214780_s_at	213521_at	212948_at	214220_s_at	214553_s_at	214554_at	213937_s_at	212424_at	214440_at	214487_s_at	214960_at	215383_x_at
214763_at	216038_x_at	213237_at	214440_at	214037_s_at	213935_at	212969_x_at	214123_s_at	215053_at	214798_at	215286_s_at	213863_s_at	213833_x_at	214030_at	214588_s_at	213896_x_at	214794_at	213542_at	212969_x_at	214246_x_at	214700_x_at	214732_at	214000_s_at	212434_at	214739_at	214553_s_at	215012_at	215568_x_at
214782_at	216123_x_at	213288_at	214695_at	214230_at	213982_s_at	213078_x_at	214152_at	215071_s_at	214819_at	215310_at	213956_at	213859_x_at	214057_at	214662_at	213940_s_at	214892_x_at	213558_at	212973_at	214723_x_at	214726_x_at	214756_x_at	214041_x_at	212442_s_at	214742_at	214790_at	215040_at	215684_s_at
215130_s_at	216174_at	213327_s_at	214771_x_at	214295_at	214000_s_at	213082_s_at	214176_s_at	215073_s_at	214843_s_at	215318_at	213968_at	213926_s_at	214060_at	214716_at	214140_at	214953_s_at	213570_at	213090_s_at	214751_at	214745_at	214802_at	214045_at	212446_s_at	214744_s_at	214807_at	215163_at	215747_s_at
215187_at	216290_x_at	213384_x_at	214867_at	214310_s_at	214008_at	213132_s_at	214333_x_at	215083_at	214967_at	215336_at	213992_at	213936_x_at	214075_at	214733_s_at	214277_at	214991_s_at	213793_s_at	213229_at	215000_s_at	214765_s_at	214813_at	214104_at	212674_s_at	214753_at	214843_s_at	215201_at	215954_s_at
215231_at	216348_at	213445_at	214892_x_at	214484_s_at	214014_at	213223_at	214474_at	215134_at	214976_at	215374_at	214001_x_at	213956_at	214230_at	214757_at	214542_x_at	215084_s_at	213799_s_at	213262_at	215063_x_at	214848_at	214819_at	214108_at	212709_at	214801_at	215024_at	215385_at	216051_x_at
215253_s_at	216399_s_at	213598_at	214901_at	214525_x_at	214021_x_at	213269_at	214552_s_at	215175_at	215114_at	215385_at	214125_s_at	214020_x_at	214293_at	214791_at	214638_s_at	215128_at	213804_at	213264_at	215096_s_at	214855_s_at	214874_at	214210_at	212714_at	214802_at	215037_s_at	215392_at	216176_at
215405_at	216422_at	213608_s_at	214930_at	214542_x_at	214141_x_at	213295_at	214684_at	215200_x_at	215148_s_at	215401_at	214215_s_at	214101_s_at	214592_s_at	214802_at	214676_x_at	215224_at	213844_at	213507_s_at	215157_x_at	215050_x_at	214931_s_at	214298_x_at	212720_at	214857_at	215073_s_at	215401_at	216262_s_at
215595_x_at	216521_s_at	213657_s_at	214934_at	214587_at	214216_s_at	213326_at	214719_at	215220_s_at	215155_at	215458_s_at	214297_at	214117_s_at	214651_s_at	214881_s_at	214733_s_at	215260_s_at	213854_at	213523_at	215764_x_at	215083_at	214992_s_at	214340_at	212739_s_at	215095_at	215191_at	215439_x_at	216299_s_at
215608_at	216565_x_at	213685_at	215013_s_at	214670_at	214306_at	213368_x_at	214758_at	215412_x_at	215246_at	215553_x_at	214327_x_at	214198_s_at	214780_s_at	214989_x_at	214734_at	215470_at	213986_s_at	213642_at	216037_x_at	215089_s_at	215044_s_at	214351_x_at	212910_at	215170_s_at	215204_at	215604_x_at	216302_at
215623_x_at	216583_x_at	213705_at	215030_at	214679_x_at	214353_at	213448_at	214775_at	215505_s_at	215342_s_at	215592_at	214342_at	214220_s_at	214831_at	215068_s_at	214813_at	215587_x_at	214005_at	213761_at	216309_x_at	215338_s_at	215073_s_at	214374_s_at	212973_at	215190_at	215262_at	215635_at	216323_x_at
215673_at	216606_x_at	213710_s_at	215156_at	214683_s_at	214476_at	213680_at	214785_at	215537_x_at	215526_at	215595_x_at	214384_s_at	214221_at	214930_at	215084_s_at	214814_at	215623_x_at	214449_s_at	213778_x_at	216524_x_at	215545_at	215329_s_at	214422_at	213262_at	215191_at	215458_s_at	215696_s_at	216348_at
215745_at	216933_x_at	213760_s_at	215213_at	214721_x_at	214649_s_at	213716_s_at	214923_at	215544_s_at	215650_at	215648_at	214409_at	214251_s_at	214933_at	215113_s_at	214826_at	215629_s_at	214666_x_at	213913_s_at	216606_x_at	215728_s_at	215471_s_at	214537_at	213459_at	215268_at	215483_at	215726_s_at	216745_x_at
215852_x_at	216942_s_at	213793_s_at	215218_s_at	214726_x_at	214688_at	213789_at	215053_at	215599_at	215825_at	215670_s_at	214649_s_at	214352_s_at	214982_at	215474_at	214895_s_at	215631_s_at	214785_at	213944_x_at	216615_s_at	215983_s_at	215507_x_at	214542_x_at	213573_at	215354_s_at	215589_at	215791_at	216822_x_at
216051_x_at	216969_s_at	213812_s_at	215268_at	214731_at	214875_x_at	213833_x_at	215131_at	215640_at	215834_x_at	215764_x_at	214694_at	214440_at	215087_at	215599_at	214980_at	215718_s_at	214791_at	214019_at	216682_s_at	216315_x_at	215552_s_at	214659_x_at	213701_at	215435_at	215608_at	215836_s_at	216971_s_at
216244_at	217141_at	213853_at	215420_at	214739_at	214902_x_at	213876_x_at	215423_at	215720_s_at	215895_x_at	215810_x_at	214893_x_at	214801_at	215187_at	215623_x_at	214989_x_at	215907_at	214909_s_at	214198_s_at	217619_x_at	216377_x_at	215581_s_at	214664_at	214314_s_at	215600_x_at	215641_at	216054_x_at	217027_x_at
216290_x_at	217144_at	213945_s_at	215499_at	214742_at	215076_s_at	213909_at	215479_at	215757_at	215907_at	215856_at	214953_s_at	214871_x_at	215218_s_at	215980_s_at	214999_s_at	215908_at	214929_s_at	214745_at	217727_x_at	216383_at	215607_x_at	214666_x_at	214355_x_at	215825_at	215739_s_at	216177_at	217052_x_at
216291_at	217173_s_at	214317_x_at	215519_x_at	214751_at	215087_at	213957_s_at	215505_s_at	215985_at	215983_s_at	215903_s_at	215157_x_at	214962_s_at	215321_at	216008_s_at	215057_at	215984_s_at	215114_at	214785_at	217807_s_at	216511_s_at	215608_at	214874_at	214359_s_at	216088_s_at	215825_at	216349_at	217210_at
216326_s_at	217185_s_at	214357_at	215583_at	214753_at	215114_at	214100_x_at	215719_x_at	215991_s_at	216028_at	216036_x_at	215169_at	215093_at	215433_at	216121_at	215058_at	216323_x_at	215483_at	215030_at	217809_at	217127_at	215719_x_at	214878_at	214794_at	216153_x_at	215856_at	216457_s_at	217216_x_at
216377_x_at	217299_s_at	214746_s_at	215591_at	215031_x_at	215116_s_at	214148_at	215720_s_at	216112_at	216217_at	216300_x_at	215342_s_at	215204_at	215691_x_at	216282_x_at	215130_s_at	216392_s_at	215909_x_at	215031_x_at	217848_s_at	217436_x_at	215786_at	214881_s_at	214882_s_at	216397_s_at	215887_at	216556_x_at	217223_s_at
216479_at	217336_at	214794_at	215597_x_at	215148_s_at	215230_x_at	214383_x_at	216031_x_at	216199_s_at	216604_s_at	216349_at	215406_at	215504_x_at	215854_at	216305_s_at	215178_x_at	216508_x_at	216153_x_at	215097_at	217880_at	217499_x_at	215954_s_at	214918_at	215178_x_at	216713_at	215891_s_at	216957_at	217364_x_at
216516_at	217598_at	214838_at	215605_at	215163_at	215243_s_at	214526_x_at	216054_x_at	216264_s_at	216682_s_at	216389_s_at	215476_at	215532_x_at	215919_s_at	216702_x_at	215253_s_at	216555_at	216178_x_at	215137_at	217905_at	217796_s_at	215963_x_at	214958_s_at	215424_s_at	216779_at	216054_x_at	217226_s_at	217393_x_at
216526_x_at	217604_at	215333_x_at	216310_at	215214_at	215252_at	214549_x_at	216071_x_at	216532_x_at	216779_at	216423_at	215575_at	215629_s_at	216322_at	216745_x_at	215287_at	216570_x_at	216284_at	215230_x_at	217932_at	217823_s_at	216177_at	214968_at	215714_s_at	216806_at	216197_at	217353_at	217501_at
216553_x_at	217624_at	215907_at	216490_x_at	215218_s_at	215358_x_at	214733_s_at	216170_at	217234_s_at	217125_at	216524_x_at	215595_x_at	215645_at	216388_s_at	216823_at	215299_x_at	216804_s_at	216511_s_at	215284_at	218030_at	218028_at	216205_s_at	214972_at	215747_s_at	216971_s_at	216300_x_at	217571_at	217598_at
216556_x_at	217644_s_at	216262_s_at	216588_at	215224_at	215373_x_at	214873_at	216277_at	217322_x_at	217135_x_at	216588_at	215657_at	215649_s_at	216531_at	216863_s_at	215439_x_at	217019_at	216556_x_at	215438_x_at	218126_at	218040_at	216248_s_at	215170_s_at	216392_s_at	217040_x_at	216349_at	217608_at	217618_x_at
216563_at	217653_x_at	216384_x_at	216620_s_at	215260_s_at	215528_at	214953_s_at	216381_x_at	217427_s_at	217393_x_at	217456_x_at	215701_at	215731_s_at	216645_at	216905_s_at	215544_s_at	217027_x_at	216885_s_at	215735_s_at	218147_s_at	218114_at	216252_x_at	215206_at	216397_s_at	217124_at	216383_at	217645_at	217662_x_at
217320_at	217793_at	216531_at	216757_at	215429_s_at	215750_at	215032_at	216627_s_at	217448_s_at	217416_x_at	217467_at	215904_at	215765_at	216682_s_at	216971_s_at	215708_s_at	217099_s_at	216947_at	215764_x_at	218194_at	218158_s_at	216348_at	215210_s_at	216532_x_at	217211_at	216532_x_at	217656_at	217760_at
217363_x_at	217876_at	216593_s_at	216880_at	215484_at	215764_x_at	215130_s_at	216713_at	217465_at	217432_s_at	217508_s_at	215999_at	215898_at	216698_x_at	217598_at	215779_s_at	217141_at	216971_s_at	216211_at	218239_s_at	218204_s_at	216360_x_at	215220_s_at	216952_s_at	217329_x_at	216873_s_at	217737_x_at	217771_at
217379_at	218028_at	216859_x_at	216945_x_at	215535_s_at	215836_s_at	215235_at	216883_x_at	217609_at	217878_s_at	217538_at	216031_x_at	216095_x_at	216962_at	217690_at	215785_s_at	217211_at	217427_s_at	216309_x_at	218308_at	218236_s_at	216442_x_at	215253_s_at	216996_s_at	217541_x_at	217027_x_at	217773_s_at	218064_s_at
217467_at	218128_at	216958_s_at	217070_at	215589_at	215907_at	215479_at	216902_s_at	217631_at	217941_s_at	217580_x_at	216090_x_at	216580_at	217118_s_at	217754_at	215881_x_at	217266_at	217501_at	216870_x_at	218398_at	218352_at	216459_x_at	215429_s_at	217027_x_at	217665_at	217045_x_at	217991_x_at	218110_at
217564_s_at	218130_at	217363_x_at	217295_at	215649_s_at	215908_at	215528_at	216915_s_at	217656_at	217972_at	217656_at	216166_at	216682_s_at	217246_s_at	217859_s_at	215910_s_at	217344_at	217606_at	217039_x_at	218447_at	218375_at	216556_x_at	215467_x_at	217185_s_at	217667_at	217100_s_at	218006_s_at	218112_at
217600_at	218195_at	217806_s_at	217326_x_at	215775_at	215927_at	215545_at	217144_at	217713_x_at	217976_s_at	217692_at	216195_at	216713_at	217295_at	217884_at	215997_s_at	217349_s_at	217793_at	217650_x_at	218568_at	218414_s_at	216823_at	215481_s_at	217645_at	217673_x_at	217127_at	218010_x_at	218169_at
217640_x_at	218301_at	217808_s_at	217469_at	215903_s_at	216061_x_at	215600_x_at	217269_s_at	217853_at	218228_s_at	217693_x_at	216313_at	216745_x_at	217331_at	217920_at	216061_x_at	217547_x_at	217899_at	217724_at	218574_s_at	218425_at	216855_s_at	215508_at	217725_x_at	217693_x_at	217166_at	218075_at	218219_s_at
217776_at	218411_s_at	217887_s_at	217598_at	216071_x_at	216101_at	215615_x_at	217379_at	217862_at	218251_at	217782_s_at	216402_at	217135_x_at	217426_at	217921_at	216115_at	217598_at	217924_at	217817_at	218580_x_at	218455_at	216915_s_at	215599_at	217754_at	217734_s_at	217419_x_at	218095_s_at	218275_at
218028_at	218474_s_at	218006_s_at	217645_at	216222_s_at	216230_x_at	215667_x_at	217508_s_at	217929_s_at	218267_at	218034_at	216444_at	217173_s_at	217446_x_at	217991_x_at	216147_at	217618_x_at	217948_at	217856_at	218633_x_at	218500_at	216993_s_at	215720_s_at	217777_s_at	217864_s_at	217467_at	218105_s_at	218278_at
218083_at	218476_at	218017_s_at	217662_x_at	216239_at	216263_s_at	215747_s_at	217707_x_at	217974_at	218327_s_at	218075_at	216453_at	217208_s_at	217482_at	218156_s_at	216267_s_at	217745_s_at	217979_at	217857_s_at	218636_s_at	218504_at	217465_at	215834_x_at	217832_at	217980_s_at	217595_at	218170_at	218385_at
218176_at	218676_s_at	218018_at	218105_s_at	216306_x_at	216284_at	215764_x_at	217772_s_at	218125_s_at	218410_s_at	218173_s_at	216490_x_at	217344_at	217640_x_at	218192_at	216806_at	217754_at	218144_s_at	217884_at	218703_at	218559_s_at	217622_at	215891_s_at	217833_at	218006_s_at	217608_at	218181_s_at	218414_s_at
218202_x_at	218685_s_at	218030_at	218199_s_at	216589_at	216300_x_at	215909_x_at	217837_s_at	218192_at	218517_at	218322_s_at	216520_s_at	217598_at	217645_at	218222_x_at	216882_s_at	217787_s_at	218218_at	217987_at	218717_s_at	218562_s_at	217671_at	215895_x_at	217850_at	218114_at	217618_x_at	218239_s_at	218424_s_at
218225_at	218753_at	218064_s_at	218238_at	216606_x_at	216399_s_at	216178_x_at	217862_at	218204_s_at	218584_at	218378_s_at	216582_at	217662_x_at	217649_at	218248_at	217057_s_at	217808_s_at	218240_at	218077_s_at	218735_s_at	218604_at	217731_s_at	216017_s_at	217851_s_at	218147_s_at	217651_at	218381_s_at	218453_s_at
218255_s_at	218779_x_at	218096_at	218356_at	216680_s_at	216788_at	216205_s_at	218072_at	218210_at	218724_s_at	218526_s_at	216702_x_at	217731_s_at	217980_s_at	218267_at	217205_at	217831_s_at	218246_at	218131_s_at	218750_at	218748_s_at	217732_s_at	216212_s_at	217884_at	218161_s_at	217838_s_at	218398_at	218500_at
218330_s_at	218798_at	218121_at	218447_at	217368_at	216856_s_at	216239_at	218270_at	218228_s_at	218777_at	218674_at	216847_at	217862_at	218408_at	218278_at	217253_at	217866_at	218276_s_at	218153_at	218808_at	218765_at	217824_at	216246_at	217908_s_at	218174_s_at	217891_at	218438_s_at	218511_s_at
218432_at	218808_at	218128_at	218476_at	217393_x_at	217129_at	216282_x_at	218275_at	218234_at	218833_at	218679_s_at	217056_at	217895_at	218442_at	218393_s_at	217446_x_at	217916_s_at	218301_at	218161_s_at	218884_s_at	218772_x_at	218113_at	216493_s_at	217925_s_at	218272_at	217892_s_at	218466_at	218670_at
218525_s_at	218958_at	218225_at	218544_s_at	217585_at	217235_x_at	216383_at	218377_s_at	218266_s_at	218869_at	218752_at	217061_s_at	218128_at	218585_s_at	218529_at	217461_x_at	217974_at	218415_at	218187_s_at	218988_at	218776_s_at	218120_s_at	216641_s_at	217945_at	218328_at	218364_at	218475_at	218695_at
218656_s_at	218968_s_at	218415_at	218560_s_at	217782_s_at	217467_at	216387_x_at	218378_s_at	218284_at	219050_s_at	218780_at	217146_at	218351_at	218595_s_at	218579_s_at	217547_x_at	217987_at	218494_s_at	218206_x_at	219002_at	218783_at	218124_at	216859_x_at	218096_at	218419_s_at	218389_s_at	218500_at	218702_at
218847_at	219021_at	218425_at	218565_at	217796_s_at	217506_at	216745_x_at	218489_s_at	218402_s_at	219100_at	218964_at	217214_s_at	218450_at	218600_at	218610_s_at	217602_at	218064_s_at	218543_s_at	218266_s_at	219028_at	218812_s_at	218128_at	216905_s_at	218153_at	218441_s_at	218420_s_at	218550_s_at	218756_s_at
219047_s_at	219024_at	218533_s_at	218568_at	217849_s_at	217541_x_at	216806_at	218510_x_at	218410_s_at	219186_at	219026_s_at	217230_at	218510_x_at	218768_at	218619_s_at	217619_x_at	218118_s_at	218578_at	218275_at	219076_s_at	218833_at	218178_s_at	216993_s_at	218156_s_at	218513_at	218590_at	218572_at	218762_at
219136_s_at	219177_at	218565_at	218646_at	218199_s_at	217542_at	216849_at	218532_s_at	218430_s_at	219223_at	219063_at	217247_at	218513_at	218808_at	218666_s_at	217644_s_at	218301_at	218579_s_at	218447_at	219092_s_at	218854_at	218282_at	217205_at	218199_s_at	218540_at	218619_s_at	218630_at	218861_at
219340_s_at	219202_at	218595_s_at	218773_s_at	218255_s_at	217556_at	216971_s_at	218701_at	218470_at	219262_at	219241_x_at	217392_at	218545_at	218837_s_at	218685_s_at	217703_x_at	218308_at	218613_at	218470_at	219098_at	218875_s_at	218302_at	217234_s_at	218238_at	218590_at	218647_s_at	218668_s_at	218869_at
219343_at	219317_at	218633_x_at	218939_at	218324_s_at	217632_at	217619_x_at	218812_s_at	218588_s_at	219291_at	219252_s_at	217404_s_at	218549_s_at	218872_at	218695_at	217735_s_at	218381_s_at	218688_at	218568_at	219145_at	218877_s_at	218325_s_at	217309_s_at	218239_s_at	218639_s_at	218665_at	218767_at	218897_at
219445_at	219320_at	218658_s_at	218953_s_at	218632_at	217767_at	217891_at	219012_s_at	218602_s_at	219297_at	219261_at	217502_at	218602_s_at	218939_at	218710_at	218024_at	218393_s_at	218759_at	218572_at	219161_s_at	218916_at	218516_s_at	217427_s_at	218284_at	218642_s_at	218674_at	218810_at	218939_at
219453_at	219328_at	218798_at	219068_x_at	218793_s_at	217880_at	217990_at	219056_at	218727_at	219395_at	219294_at	217507_at	218785_s_at	218962_s_at	218879_s_at	218252_at	218439_s_at	218772_x_at	218590_at	219166_at	218923_at	218537_at	217502_at	218295_s_at	218783_at	218874_s_at	218854_at	219019_at
219473_at	219340_s_at	218801_at	219071_x_at	218833_at	217941_s_at	218018_at	219210_s_at	218787_x_at	219489_s_at	219624_at	217630_at	218897_at	218982_s_at	218896_s_at	218264_at	218475_at	218875_s_at	218607_s_at	219192_at	219019_at	218694_at	217534_at	218331_s_at	218914_at	218951_s_at	218880_at	219088_s_at
219502_at	219451_at	218875_s_at	219078_at	218837_s_at	218012_at	218020_s_at	219377_at	218836_at	219570_at	219635_at	218687_s_at	218994_s_at	218994_s_at	218944_at	218279_s_at	218536_at	218935_at	218633_x_at	219228_at	219056_at	218759_at	217543_s_at	218340_s_at	218953_s_at	219024_at	218894_s_at	219098_at
219512_at	219868_s_at	218904_s_at	219177_at	218895_at	218105_s_at	218051_s_at	219398_at	219163_at	219717_at	219718_at	219026_s_at	219047_s_at	219016_at	219066_at	218301_at	218564_at	219021_at	218653_at	219286_s_at	219084_at	218854_at	217550_at	218354_at	219028_at	219051_x_at	218968_s_at	219120_at
219637_at	219917_at	218949_s_at	219208_at	219131_at	218547_at	218225_at	219402_s_at	219219_at	219753_at	219753_at	219222_at	219056_at	219078_at	219071_x_at	218453_s_at	218569_s_at	219084_at	218664_at	219377_at	219145_at	218911_at	217584_at	218427_at	219086_at	219056_at	219003_s_at	219150_s_at
219661_at	219920_s_at	218977_s_at	219238_at	219223_at	218573_at	218441_s_at	219419_at	219246_s_at	219814_at	219861_at	219252_s_at	219127_at	219114_at	219143_s_at	218466_at	218605_at	219104_at	218710_at	219406_at	219295_s_at	218931_at	217608_at	218481_at	219154_at	219068_x_at	219018_s_at	219154_at
219674_s_at	219925_at	219016_at	219299_at	219262_at	218636_s_at	218504_at	219542_at	219341_at	219978_s_at	219891_at	219579_at	219138_at	219183_s_at	219149_x_at	218490_s_at	218609_s_at	219211_at	218735_s_at	219439_at	219335_at	218977_s_at	217653_x_at	218488_at	219169_s_at	219180_s_at	219094_at	219328_at
219749_at	219952_s_at	219050_s_at	219328_at	219395_at	218647_s_at	218601_at	219608_s_at	219484_at	220097_s_at	219968_at	219601_s_at	219208_at	219218_at	219151_s_at	218524_at	218663_at	219341_at	218743_at	219458_s_at	219337_at	219326_s_at	217681_at	218513_at	219174_at	219289_at	219137_s_at	219398_at
219793_at	219953_s_at	219063_at	219510_at	219405_at	218810_at	218673_s_at	219886_at	219504_s_at	220128_s_at	219980_at	219642_s_at	219216_at	219233_s_at	219156_at	218537_at	218670_at	219349_s_at	218782_s_at	219487_at	219340_s_at	219376_at	217690_at	218536_at	219209_at	219320_at	219166_at	219486_at
219838_at	220018_at	219130_at	219541_at	219491_at	218879_s_at	218743_at	219904_at	219621_at	220182_at	220116_at	219672_at	219238_at	219252_s_at	219250_s_at	218655_s_at	218695_at	219368_at	218882_s_at	219500_at	219446_at	219399_at	217778_at	218544_s_at	219354_at	219382_at	219289_at	219627_at
219859_at	220033_at	219177_at	219650_at	219541_at	218902_at	218774_at	219979_s_at	219625_s_at	220198_s_at	220198_s_at	219842_at	219244_s_at	219265_at	219253_at	218808_at	218724_s_at	219408_at	218885_s_at	219513_s_at	219583_s_at	219418_at	217862_at	218598_at	219360_s_at	219507_at	219448_at	219665_at
219874_at	220215_at	219224_x_at	219713_at	219690_at	219086_at	218836_at	220116_at	219663_s_at	220207_at	220335_x_at	219977_at	219294_at	219428_s_at	219254_at	218985_at	218776_s_at	219409_at	218887_at	219517_at	219631_at	219435_at	217863_at	218605_at	219380_x_at	219541_at	219510_at	219673_at
219951_s_at	220242_x_at	219226_at	219745_at	219707_at	219098_at	218869_at	220137_at	219674_s_at	220210_at	220349_s_at	219995_s_at	219401_at	219497_s_at	219333_s_at	219048_at	218860_at	219472_at	218889_at	219678_x_at	219696_at	219444_at	217974_at	218767_at	219482_at	219613_s_at	219513_s_at	219680_at
219972_s_at	220255_at	219237_s_at	219860_at	219760_at	219110_at	219070_s_at	220195_at	219679_s_at	220227_at	220451_s_at	220032_at	219448_at	219707_at	219486_at	219164_s_at	218861_at	219583_s_at	218926_at	219770_at	219831_at	219469_at	218328_at	218797_s_at	219486_at	219713_at	219968_at	219690_at
220054_at	220391_at	219258_at	219990_at	219774_at	219154_at	219088_s_at	220223_at	219951_s_at	220233_at	220696_at	220197_at	219897_at	219828_at	219590_x_at	219211_at	218938_at	219683_at	219043_s_at	219931_s_at	219880_at	219490_s_at	218400_at	218798_at	219664_s_at	219760_at	219982_s_at	219731_at
220232_at	220500_s_at	219320_at	220042_x_at	219792_at	219182_at	219111_s_at	220277_at	220033_at	220242_x_at	220712_at	220210_at	219925_at	220016_at	219632_s_at	219228_at	219000_s_at	219753_at	219048_at	219933_at	219917_at	219538_at	218522_s_at	218859_s_at	219688_at	219861_at	219986_s_at	219846_at
220357_s_at	220608_s_at	219344_at	220221_at	219805_at	219208_at	219165_at	220292_at	220091_at	220338_at	220728_at	220225_at	219990_at	220085_at	219661_at	219312_s_at	219123_at	219838_at	219050_s_at	220007_at	219959_at	219590_x_at	218800_at	218866_s_at	219951_s_at	219886_at	220089_at	220078_at
220491_at	220760_x_at	219361_s_at	220397_at	219831_at	219261_at	219207_at	220342_x_at	220103_s_at	220352_x_at	220729_at	220234_at	220171_x_at	220088_at	219713_at	219401_at	219143_s_at	219905_at	219103_at	220078_at	220171_x_at	219616_at	218837_s_at	218877_s_at	219953_s_at	219953_s_at	220288_at	220176_at
220703_at	220796_x_at	219378_at	220494_s_at	219915_s_at	219279_at	219228_at	220374_at	220370_s_at	220671_at	220753_s_at	220275_at	220255_at	220165_at	219842_at	219409_at	219219_at	219986_s_at	219152_at	220121_at	220212_s_at	219683_at	219028_at	218886_at	220007_at	219972_s_at	220391_at	220181_x_at
220725_x_at	220855_at	219419_at	220500_s_at	220050_at	219408_at	219551_at	220438_at	220395_at	220690_s_at	221050_s_at	220354_at	220391_at	220210_at	219868_s_at	219472_at	219226_at	220173_at	219170_at	220264_s_at	220305_at	219758_at	219141_s_at	218936_s_at	220296_at	220048_at	220855_at	220195_at
220771_at	220986_s_at	219531_at	220762_s_at	220128_s_at	219427_at	219706_at	220452_x_at	220549_at	220703_at	221065_s_at	220364_at	220572_at	220243_at	219881_s_at	219705_at	219448_at	220238_s_at	219200_at	220311_at	220354_at	219774_at	219165_at	218984_at	220305_at	220115_s_at	220943_s_at	220466_at
220797_at	221036_s_at	219560_at	220870_at	220150_s_at	219435_at	219723_x_at	220482_s_at	220572_at	220905_at	221210_s_at	220468_at	220729_at	220251_at	219913_s_at	219741_x_at	219486_at	220241_at	219202_at	220352_x_at	220525_s_at	219784_at	219341_at	219006_at	220954_s_at	220122_at	220945_x_at	220587_s_at
220828_s_at	221048_x_at	219627_at	221005_s_at	220221_at	219883_at	219838_at	220558_x_at	220720_x_at	220915_s_at	221224_s_at	220592_at	220855_at	220319_s_at	219980_at	219846_at	219861_at	220387_s_at	219226_at	220647_s_at	220606_s_at	219797_at	219608_s_at	219056_at	221079_s_at	220250_at	221098_x_at	220734_s_at
220945_x_at	221176_x_at	219774_at	221044_s_at	220618_s_at	219906_at	220223_at	220774_at	220946_s_at	220977_x_at	221523_s_at	220606_s_at	220945_x_at	220326_s_at	220073_s_at	219996_at	219980_at	220576_at	219408_at	220725_x_at	220926_s_at	219805_at	219708_at	219083_at	221135_s_at	220668_s_at	221103_s_at	220874_at
220955_x_at	221206_at	219951_s_at	221135_s_at	220632_s_at	220042_x_at	220236_at	220874_at	220954_s_at	221049_s_at	221551_x_at	220623_s_at	221014_s_at	220346_at	220089_at	220018_at	220028_at	220590_at	219449_s_at	220795_s_at	220988_s_at	219868_s_at	220063_at	219110_at	221219_s_at	220947_s_at	221196_x_at	220998_s_at
221043_at	221222_s_at	219956_at	221188_s_at	220659_s_at	220201_at	220840_s_at	220926_s_at	220956_s_at	221247_s_at	221616_s_at	220826_at	221045_s_at	220608_s_at	220155_s_at	220086_at	220063_at	220659_s_at	220085_at	220839_at	220992_s_at	219874_at	220091_at	219158_s_at	221498_at	220987_s_at	221482_s_at	221025_x_at
221044_s_at	221251_x_at	220007_at	221196_x_at	220757_s_at	220589_s_at	221265_s_at	221012_s_at	220969_s_at	221339_at	221617_at	220877_at	221244_s_at	220890_s_at	220176_at	220103_s_at	220160_s_at	220682_s_at	220087_at	220915_s_at	221007_s_at	220150_s_at	220092_s_at	219166_at	221560_at	221043_at	221493_at	221073_s_at
221119_at	221265_s_at	220089_at	221251_x_at	221071_at	220998_s_at	221306_at	221079_s_at	220988_s_at	221436_s_at	221707_s_at	220907_at	221593_s_at	220951_s_at	220241_at	220143_x_at	220417_s_at	220764_at	220089_at	220945_x_at	221135_s_at	220195_at	220174_at	219198_at	221616_s_at	221251_x_at	221540_x_at	221187_s_at
221224_s_at	221600_s_at	220452_x_at	221332_at	221569_at	221010_s_at	221332_at	221248_s_at	220999_s_at	221650_s_at	221710_x_at	221057_at	221649_s_at	221069_s_at	220386_s_at	220181_x_at	220855_at	220773_s_at	220097_s_at	221027_s_at	221540_x_at	220240_s_at	220341_s_at	219275_at	221636_s_at	221527_s_at	221564_at	221222_s_at
221244_s_at	221634_at	220458_at	221543_s_at	221592_at	221044_s_at	221464_at	221332_at	221155_x_at	221810_at	221840_at	221077_at	221656_s_at	221139_s_at	220526_s_at	220311_at	220864_s_at	220788_s_at	220143_x_at	221274_s_at	221548_s_at	220242_x_at	220483_s_at	219283_at	221740_x_at	221561_at	221568_s_at	221224_s_at
221260_s_at	221636_s_at	220671_at	221629_x_at	221594_at	221050_s_at	221563_at	221350_at	221418_s_at	221838_at	221845_s_at	221131_at	221745_at	221146_at	220647_s_at	220408_x_at	221056_x_at	220962_s_at	220730_at	221481_x_at	221559_s_at	220610_s_at	220658_s_at	219354_at	221759_at	221582_at	221594_at	221247_s_at
221268_s_at	221656_s_at	220796_x_at	221653_x_at	221656_s_at	221065_s_at	221647_s_at	221511_x_at	221428_s_at	221892_at	221856_s_at	221170_at	221750_at	221308_at	220688_s_at	220692_at	221155_x_at	220985_s_at	220949_s_at	221536_s_at	221686_s_at	220720_x_at	220760_x_at	219378_at	221762_s_at	221629_x_at	221683_s_at	221549_at
221381_s_at	221772_s_at	220856_x_at	221785_at	221707_s_at	221217_s_at	221701_s_at	221534_at	221555_x_at	222024_s_at	221890_at	221205_at	221751_at	221406_s_at	220800_s_at	220844_at	221277_s_at	221223_x_at	221247_s_at	221538_s_at	221834_at	220987_s_at	220914_at	219819_s_at	221794_at	221681_s_at	221879_at	221587_s_at
221564_at	221920_s_at	220998_s_at	221879_at	221840_at	221272_s_at	221706_s_at	221551_x_at	221556_at	222048_at	221897_at	221221_s_at	221869_at	221521_s_at	221079_s_at	221207_s_at	221549_at	221703_at	221536_s_at	221540_x_at	221883_at	221036_s_at	220973_s_at	219940_s_at	221812_at	221710_x_at	221972_s_at	221590_s_at
221679_s_at	222109_at	221135_s_at	221940_at	221880_s_at	221418_s_at	221737_at	221656_s_at	221616_s_at	222164_at	221961_at	221332_at	221922_at	221747_at	221187_s_at	221428_s_at	221601_s_at	221803_s_at	221607_x_at	221645_s_at	221919_at	221039_s_at	221043_at	219988_s_at	221813_at	221733_s_at	222037_at	221634_at
221785_at	222120_at	221508_at	221941_at	221964_at	221508_at	221759_at	221881_s_at	221673_s_at	222224_at	221986_s_at	221334_s_at	221997_s_at	221904_at	221270_s_at	221549_at	221727_at	221823_at	221727_at	221732_at	221940_at	221147_x_at	221063_x_at	220007_at	221846_s_at	221744_at	222228_s_at	221708_s_at
221790_s_at	222164_at	221561_at	222032_s_at	222067_x_at	221541_at	221861_at	221934_s_at	221769_at	222228_s_at	222094_at	221552_at	222006_at	221925_s_at	221274_s_at	221664_s_at	221764_at	221919_at	221768_at	221767_x_at	221941_at	221222_s_at	221418_s_at	220175_s_at	221887_s_at	221776_s_at	222375_at	221822_at
221868_at	222309_at	221634_at	222044_at	222094_at	221592_at	221920_s_at	221960_s_at	221784_at	222339_x_at	222105_s_at	221633_at	222015_at	222047_s_at	221506_s_at	221695_s_at	222019_at	221954_at	221845_s_at	221825_at	221953_s_at	221232_s_at	221560_at	220178_at	221888_at	221849_s_at	32069_at	222048_at
221883_at	222351_at	221940_at	222113_s_at	222105_s_at	221679_s_at	221953_s_at	222032_s_at	221838_at	33323_r_at	222254_at	221691_x_at	222027_at	222052_at	221548_s_at	221748_s_at	222041_at	221964_at	221856_s_at	221831_at	222087_at	221306_at	221565_s_at	220547_s_at	221925_s_at	222121_at	33736_at	222109_at
221917_s_at	222380_s_at	221972_s_at	222214_at	222109_at	221748_s_at	221971_x_at	222129_at	221894_at	34726_at	222256_s_at	221856_s_at	222269_at	222056_s_at	221727_at	221794_at	222109_at	221967_at	221940_at	221845_s_at	222165_x_at	221412_at	221583_s_at	220688_s_at	221987_s_at	222175_s_at	33760_at	222147_s_at
221960_s_at	32541_at	222065_s_at	222305_at	222245_s_at	221883_at	222175_s_at	222145_at	221917_s_at	35179_at	222317_at	221867_at	222312_s_at	222113_s_at	221819_at	221813_at	222113_s_at	221982_x_at	221990_at	221970_s_at	222273_at	221628_s_at	221917_s_at	220789_s_at	222104_x_at	222228_s_at	35148_at	222151_s_at
222129_at	34689_at	222120_at	222375_at	222320_at	222014_x_at	31637_s_at	222214_at	221925_s_at	36612_at	222376_at	222041_at	32062_at	222150_s_at	221890_at	221928_at	222131_x_at	221988_at	222006_at	222006_at	222371_at	221785_at	221939_at	221094_s_at	222191_s_at	222252_x_at	36019_at	222152_at
222138_s_at	34726_at	222269_at	32032_at	222343_at	222062_at	32062_at	222316_at	222027_at	37424_at	34726_at	222096_x_at	32723_at	222248_s_at	221987_s_at	221953_s_at	222163_s_at	222011_s_at	222302_at	222305_at	243_g_at	222048_at	222013_x_at	221247_s_at	222294_s_at	222273_at	37793_r_at	222175_s_at
222163_s_at	37433_at	31637_s_at	32062_at	36564_at	222155_s_at	36907_at	222339_x_at	222057_at	37831_at	36907_at	222101_s_at	33778_at	222270_at	222029_x_at	222030_at	222309_at	222200_s_at	33767_at	31874_at	31637_s_at	222093_s_at	222130_s_at	221497_x_at	32088_at	222304_x_at	39891_at	222221_x_at
222279_at	39854_r_at	32259_at	33736_at	36865_at	222222_s_at	37028_at	36920_at	222065_s_at	39249_at	37424_at	222112_at	34449_at	222310_at	222037_at	222149_x_at	222310_at	222245_s_at	34764_at	35160_at	32259_at	222099_s_at	222145_at	221510_s_at	35666_at	222368_at	46323_at	222222_s_at
32091_at	40612_at	37424_at	34764_at	37254_at	222236_s_at	37424_at	37079_at	222094_at	40489_at	39817_s_at	222187_x_at	34726_at	34764_at	222104_x_at	222224_at	222335_at	222270_at	35179_at	35666_at	36545_s_at	222192_s_at	222152_at	221514_at	36865_at	36564_at	47083_at	31874_at
35148_at	41657_at	37577_at	37384_at	37425_g_at	222290_at	40359_at	41856_at	222180_at	40524_at	43934_at	222259_s_at	36612_at	36030_at	222132_s_at	222254_at	222366_at	222309_at	35666_at	35685_at	37254_at	222304_x_at	222204_s_at	221571_at	38447_at	36907_at	48106_at	37408_at
38892_at	49679_s_at	41512_at	44120_at	39854_r_at	32029_at	41858_at	43934_at	222214_at	40612_at	48580_at	222277_at	36907_at	41512_at	222276_at	35617_at	32091_at	31637_s_at	47083_at	36475_at	37424_at	40640_at	222311_s_at	221688_s_at	39854_r_at	396_f_at	48825_at	41856_at
41329_at	564_at	41657_at	44702_at	40149_at	43934_at	44617_at	53071_s_at	222252_x_at	56919_at	55616_at	222363_at	37590_g_at	44120_at	34260_at	36612_at	48808_at	36888_at	47105_at	40420_at	39835_at	48612_at	37254_at	221693_s_at	47069_at	47530_at	53071_s_at	48030_i_at
42361_g_at	60528_at	48117_at	45653_at	45653_at	49329_at	55616_at	57739_at	34858_at	59705_at	60471_at	31835_at	47105_at	58780_s_at	36830_at	39854_r_at	63825_at	37802_r_at	52005_at	56256_at	46665_at	56197_at	48030_i_at	221861_at	48659_at	59705_at	55081_at	54051_at
48030_i_at	76897_s_at	48659_at	47105_at	53987_at	49452_at	57539_at	60794_f_at	40569_at	61874_at	65630_at	32029_at	50965_at	58900_at	39854_r_at	52731_at	64408_s_at	49485_at	52078_at	57082_at	55065_at	58900_at	60815_at	221970_s_at	55662_at	64064_at	64064_at	89476_r_at
55081_at	78047_s_at	63825_at	54970_at	632_at	635_s_at	59433_at	64432_at	64440_at	64418_at	78047_s_at	33323_r_at	52285_f_at	60471_at	53202_at	58900_at	65585_at	52741_at	58994_at	57540_at	55093_at	77508_r_at	71933_at	221987_s_at	60815_at	64371_at	65630_at	91703_at
59644_at	90610_at	78383_at	91826_at	64440_at	74694_s_at	65630_at	71933_at	66053_at	AFFX-BioDn-3_at	78383_at	53991_at	59644_at	65718_at	91826_at	78383_at	91684_g_at	91816_f_at	AFFX-HSAC07/X00351_3_at	91682_at	57516_at	91682_at	AFFX-HUMISGF3A/M97935_5_at	222064_s_at	74694_s_at	65635_at	78495_at	AFFX-r2-Ec-bioB-5_at
