# Supplementary material for: Drug repositioning by applying ‘expression profiles’ generated by integrating chemical structure similarity and gene semantic similarity
Source: Royal Society of Chemistry journal article supplement (doi:10.1039/c3mb70554d), 2014-02-13
Supplement: c3mb70554d10.xlsx [file c3mb70554d10.xlsx]

## Sheet: A
The similarity drugs obtained from cMap online tool with 28 drugs whose signature length was 300.
Aminocaproic Acid-300
rank	cmap name	enrichment	p
1	aminocaproic acid	1	0
2	alfadolone	0.945	0.00022
3	rimexolone	0.869	0.0004
4	amiodarone	0.819	0.00042
5	medrysone	0.762	0.00046
7	Prestwick-972	0.923	0.00094
9	meticrane	0.77	0.0014
12	8-azaguanine	0.822	0.00173
13	atropine methonitrate	0.904	0.0018
16	chrysin	0.896	0.00216
18	proxymetacaine	0.797	0.00322
19	idazoxan	0.796	0.00332
21	nipecotic acid	0.785	0.0041
22	N-acetyl-L-leucine	0.783	0.00414
23	levonorgestrel	0.662	0.00429
24	sanguinarine	0.951	0.00439
25	thioguanosine	0.76	0.00627
28	nicotinic acid	0.753	0.00718
29	morantel	0.688	0.00735
31	cinoxacin	0.746	0.00792
32	articaine	0.84	0.00809
35	proxyphylline	0.727	0.0111
36	talampicillin	0.724	0.01156
37	aminohippuric acid	0.72	0.01233
38	omeprazole	0.715	0.01333
39	econazole	0.706	0.01544
41	deptropine	0.705	0.01574
43	tolfenamic acid	0.7	0.01677
44	gliquidone	0.697	0.01733
45	enilconazole	0.694	0.01824
46	5230742	0.904	0.01877
47	remoxipride	0.691	0.01898
48	natamycin	0.69	0.01932
52	denatonium benzoate	0.68	0.02262
54	norcyclobenzaprine	0.676	0.02417
58	guaifenesin	0.559	0.02777
59	alsterpaullone	0.759	0.02778
62	neomycin	0.604	0.02952
63	furaltadone	0.552	0.03035
64	meropenem	0.66	0.03046
65	daunorubicin	0.658	0.03165
66	acetylsalicylic acid	0.381	0.03188
67	lomefloxacin	0.548	0.03232
68	ifenprodil	0.656	0.03256
69	tracazolate	0.655	0.03268
70	moracizine	0.654	0.03322
72	tiabendazole	0.654	0.03364
73	lorglumide	0.591	0.03523
74	vidarabine	0.65	0.03535
75	scopoletin	0.867	0.03616
78	bupivacaine	0.643	0.03949
79	clioquinol	0.581	0.04015
81	flunixin	0.576	0.0431
82	harmine	0.635	0.04351
83	thiostrepton	0.635	0.04365
84	amoxicillin	0.632	0.04544
86	clindamycin	0.569	0.04724
88	diltiazem	0.569	0.04758
90	cyproterone	0.629	0.04768
91	bisacodyl	0.627	0.0485
Aminophylline-300
rank	cmap name	enrichment	p
1	aminophylline	1	0
2	ganciclovir	0.966	0
3	esculin	0.952	0
4	protoveratrine A	0.856	0.00056
6	nizatidine	0.85	0.00074
8	sulfaquinoxaline	0.921	0.00112
9	medrysone	0.693	0.00217
10	sulconazole	0.81	0.00243
11	tracazolate	0.81	0.00247
12	betahistine	0.809	0.00247
13	acetylsalicylic acid	0.485	0.00273
14	dextromethorphan	0.801	0.00296
15	apramycin	0.8	0.00302
16	estriol	0.793	0.00362
18	pyrazinamide	0.788	0.00394
19	etamsylate	0.784	0.00412
20	bergenin	0.783	0.00412
21	guanadrel	0.707	0.00513
22	mephenesin	0.704	0.00537
23	bromopride	0.648	0.00548
26	talampicillin	0.762	0.00605
28	naftopidil	0.85	0.00641
29	progesterone	0.752	0.00724
30	pentolonium	0.688	0.00729
32	simvastatin	0.749	0.0076
33	testosterone	0.684	0.00797
34	hydralazine	0.63	0.00797
36	vidarabine	0.732	0.01017
37	cefalexin	0.67	0.01037
38	paracetamol	0.731	0.01038
39	ioversol	0.726	0.01138
40	dimethadione	0.724	0.0116
41	crotamiton	0.724	0.01162
42	nitrendipine	0.662	0.01182
43	orciprenaline	0.717	0.01313
44	rolitetracycline	0.716	0.01325
45	Prestwick-674	0.599	0.01337
46	prasterone	0.711	0.01412
47	methocarbamol	0.807	0.01434
48	pridinol	0.709	0.01472
49	torasemide	0.708	0.01488
50	fursultiamine	0.707	0.01518
51	mebendazole	0.648	0.01534
53	tiabendazole	0.699	0.01695
54	eucatropine	0.585	0.01746
56	lorglumide	0.638	0.01768
57	trimethadione	0.695	0.0181
58	bezafibrate	0.692	0.01866
59	hexestrol	0.69	0.01932
60	cinoxacin	0.689	0.01963
62	fluvoxamine	0.686	0.02075
64	ginkgolide A	0.681	0.02216
65	colistin	0.681	0.02226
67	thioperamide	0.622	0.02253
68	clopamide	0.68	0.02272
69	capsaicin	0.679	0.02298
70	clebopride	0.678	0.02331
72	canavanine	0.763	0.02638
73	sulfamethoxypyridazine	0.612	0.02645
74	norethisterone	0.669	0.02654
75	phthalylsulfathiazole	0.607	0.02842
76	pentetic acid	0.606	0.02888
77	alpha-estradiol	0.35	0.02952
79	8-azaguanine	0.657	0.03197
81	cetirizine	0.656	0.03223
82	tobramycin	0.655	0.03298
83	sulfachlorpyridazine	0.596	0.03338
84	dequalinium chloride	0.654	0.03364
85	zoxazolamine	0.652	0.03445
86	flunarizine	0.65	0.03535
88	bemegride	0.648	0.0364
89	halcinonide	0.588	0.03663
91	enoxacin	0.645	0.03815
92	milrinone	0.729	0.03914
93	clenbuterol	0.582	0.03969
94	pancuronium bromide	0.642	0.0403
95	ethosuximide	0.641	0.04042
97	ampicillin	0.635	0.04351
98	trichlormethiazide	0.633	0.04496
99	ascorbic acid	0.632	0.04579
100	harmine	0.631	0.04625
102	imipenem	0.627	0.04828
103	ketorolac	0.626	0.0487
104	cycloserine	0.625	0.04957
Amoxapine-300
rank	cmap name	enrichment	p
1	amoxapine	1	0
2	phenoxybenzamine	0.945	0
3	cloperastine	0.89	0
4	prochlorperazine	0.655	0
5	thioridazine	0.563	0
6	trichostatin A	0.407	0
7	LY-294002	0.341	0
8	tanespimycin	0.292	0
9	trifluoperazine	0.581	4e-05
10	cyproheptadine	0.853	0.00016
11	astemizole	0.851	0.00018
12	vorinostat	0.58	0.00022
14	methylbenzethonium chloride	0.785	0.00026
16	dequalinium chloride	0.855	0.00058
17	pyrvinium	0.739	0.00085
18	mefloquine	0.787	0.00096
19	8-azaguanine	0.842	0.00101
21	loperamide	0.725	0.00113
22	medrysone	0.716	0.00149
23	levonorgestrel	0.706	0.00173
24	syrosingopine	0.82	0.00183
26	niclosamide	0.744	0.0025
27	norcyclobenzaprine	0.799	0.00306
28	sirolimus	0.265	0.00333
30	perphenazine	0.716	0.00423
32	chlorpromazine	0.389	0.00437
33	promazine	0.66	0.00457
34	Prestwick-685	0.711	0.00471
35	quinisocaine	0.772	0.00515
39	pimozide	0.761	0.00623
40	diltiazem	0.693	0.00685
44	clomipramine	0.739	0.00889
45	nortriptyline	0.739	0.00897
46	suloctidil	0.738	0.00909
47	luteolin	0.736	0.00939
48	wortmannin	0.371	0.00974
49	prenylamine	0.734	0.00979
50	piperlongumine	0.928	0.00992
53	trazodone	0.824	0.01094
54	terfenadine	0.821	0.01144
55	dosulepin	0.723	0.01166
56	alexidine	0.722	0.01188
58	perhexiline	0.718	0.01281
60	metergoline	0.714	0.01349
61	blebbistatin	0.914	0.01481
62	camptothecin	0.803	0.01568
65	clemizole	0.641	0.01698
67	tonzonium bromide	0.695	0.01818
68	geldanamycin	0.38	0.01878
69	verteporfin	0.789	0.01921
70	fluspirilene	0.69	0.01932
72	antimycin A	0.628	0.02051
75	oxetacaine	0.627	0.02095
76	naloxone	0.575	0.02153
78	spiperone	0.896	0.02229
81	alsterpaullone	0.774	0.02334
83	beta-escin	0.567	0.02433
85	acepromazine	0.675	0.02453
87	liothyronine	0.672	0.0252
88	amiodarone	0.613	0.02601
90	0175029-0000	0.562	0.02624
91	clioquinol	0.612	0.02645
92	repaglinide	0.669	0.02674
93	0297417-0002B	0.762	0.02684
94	triflusal	0.761	0.02708
95	5224221	0.884	0.02756
96	gossypol	0.557	0.02854
97	tyloxapol	0.661	0.03
100	ebselen	0.749	0.03123
103	quinostatin	0.867	0.03616
104	fluphenazine	0.32	0.03779
108	bepridil	0.641	0.04056
109	famotidine	0.58	0.04089
110	rottlerin	0.724	0.04132
111	famprofazone	0.532	0.0416
112	CP-645525-01	0.722	0.04252
113	dacarbazine	0.635	0.04372
114	phenindione	0.633	0.04464
115	doxazosin	0.633	0.04474
119	bisacodyl	0.631	0.04625
124	apigenin	0.626	0.04896
125	labetalol	0.625	0.04933
126	imipramine	0.624	0.04983
Benzocaine-300
rank	cmap name	enrichment	p
1	benzocaine	1	0
3	amantadine	0.952	0
5	nadolol	0.923	4e-05
6	adiphenine	0.897	4e-05
7	thioperamide	0.893	6e-05
8	biperiden	0.889	6e-05
9	levopropoxyphene	0.899	0.0001
10	nystatin	0.942	0.00024
11	thiamphenicol	0.841	0.00024
13	gentamicin	0.849	0.00074
14	sulfadimethoxine	0.798	0.00084
16	monensin	0.73	0.00103
17	canadine	0.828	0.00133
18	finasteride	0.718	0.00137
19	haloperidol	0.315	0.00221
21	chlorogenic acid	0.809	0.00247
22	CP-320650-01	0.599	0.00271
26	lasalocid	0.792	0.00366
27	viomycin	0.791	0.00368
30	meclocycline	0.783	0.00412
31	disopyramide	0.781	0.00434
32	nomegestrol	0.866	0.00451
34	iodixanol	0.86	0.00521
36	pirenperone	0.701	0.00569
38	CP-944629	0.76	0.00631
40	diphenylpyraline	0.636	0.00703
41	alprostadil	0.59	0.00725
42	iohexol	0.75	0.0075
44	betulinic acid	0.747	0.00782
46	iopromide	0.743	0.0082
47	CP-863187	0.74	0.00875
48	etiocholanolone	0.62	0.00922
49	meteneprost	0.737	0.00939
50	Gly-His-Lys	0.832	0.00951
51	midodrine	0.674	0.00959
53	thiamazole	0.613	0.01047
55	Prestwick-682	0.725	0.0115
60	PHA-00745360	0.526	0.01384
62	quipazine	0.708	0.01498
66	streptozocin	0.704	0.01593
67	5194442	0.704	0.01597
68	arecoline	0.702	0.01625
69	homatropine	0.642	0.0167
71	naringenin	0.699	0.01701
74	leflunomide	0.691	0.019
75	fluticasone	0.689	0.01963
83	benzathine benzylpenicillin	0.685	0.02093
89	trimethobenzamide	0.615	0.02489
90	methyldopate	0.671	0.02602
93	hycanthone	0.666	0.02779
94	zuclopenthixol	0.666	0.02787
97	lisuride	0.606	0.02862
99	Prestwick-692	0.663	0.02906
104	metampicillin	0.603	0.03014
105	felbinac	0.661	0.03032
106	merbromin	0.601	0.03076
108	gelsemine	0.658	0.03141
115	yohimbic acid	0.738	0.03527
116	meclofenamic acid	0.59	0.03535
117	guanabenz	0.59	0.03549
120	tolmetin	0.647	0.0373
123	rilmenidine	0.644	0.03867
130	nicardipine	0.638	0.04193
131	pyrithyldione	0.638	0.04221
133	tranexamic acid	0.577	0.04274
137	vigabatrin	0.719	0.04397
138	dihydroergocristine	0.633	0.04464
142	etoposide	0.63	0.04677
145	ondansetron	0.628	0.04816
Bethanechol-300
rank	cmap name	enrichment	p
1	bethanechol	1	0
2	phensuximide	0.963	0
4	prednicarbate	0.987	2e-05
6	tribenoside	0.876	0.00034
7	talampicillin	0.855	0.00058
8	penbutolol	0.924	0.00088
9	ritodrine	0.843	0.00099
10	androsterone	0.838	0.00107
11	scopoletin	0.961	0.00264
12	S-propranolol	0.803	0.00286
13	nitrofural	0.785	0.0041
14	suramin sodium	0.77	0.00539
15	biotin	0.848	0.00663
16	gentamicin	0.756	0.00674
21	viomycin	0.742	0.00847
22	torasemide	0.742	0.00849
23	anisomycin	0.74	0.00873
24	ambroxol	0.736	0.00943
26	nilutamide	0.731	0.01038
27	roxarsone	0.729	0.01064
28	chlortalidone	0.727	0.01098
29	rilmenidine	0.727	0.01112
30	loracarbef	0.721	0.01213
31	iopanoic acid	0.719	0.01253
33	telenzepine	0.713	0.01377
35	Prestwick-1083	0.803	0.01562
36	rimexolone	0.701	0.01643
37	deptropine	0.697	0.01757
38	harmol	0.696	0.01784
39	procarbazine	0.794	0.01801
40	metampicillin	0.629	0.02011
41	dropropizine	0.687	0.02035
42	niflumic acid	0.686	0.02085
43	pentoxifylline	0.626	0.02111
44	benzylpenicillin	0.684	0.02129
47	enilconazole	0.681	0.02226
48	risperidone	0.773	0.02344
49	STOCK1N-28457	0.77	0.02418
50	erythromycin	0.61	0.02722
52	quinpirole	0.662	0.02988
53	bumetanide	0.659	0.03105
54	proguanil	0.748	0.03167
55	alpha-yohimbine	0.745	0.03227
58	tetraethylenepentamine	0.546	0.03367
59	vancomycin	0.653	0.0338
60	etomidate	0.734	0.03668
61	mesalazine	0.586	0.03761
62	tinidazole	0.537	0.03814
63	15(S)-15-methylprostaglandin E2	0.644	0.03867
64	coralyne	0.642	0.03995
66	sulfacetamide	0.64	0.0411
67	etamivan	0.637	0.04245
72	betulin	0.714	0.04577
74	pivmecillinam	0.631	0.04621
75	ioxaglic acid	0.713	0.04631
Bromocriptine-300
rank	cmap name	enrichment	p
1	bromocriptine	0.999	0
2	thioridazine	0.767	0
3	prochlorperazine	0.682	0
4	trifluoperazine	0.681	0
5	sirolimus	0.656	0
6	LY-294002	0.606	0
7	trichostatin A	0.593	0
8	wortmannin	0.554	0
9	tanespimycin	0.436	0
10	vorinostat	0.671	2e-05
11	pimozide	0.928	4e-05
12	resveratrol	0.714	4e-05
13	fluphenazine	0.537	4e-05
14	latamoxef	0.942	0.00024
15	syrosingopine	0.878	0.0003
16	mefloquine	0.826	0.00032
18	bepridil	0.867	0.0004
21	quinostatin	0.981	0.00064
22	propafenone	0.85	0.00072
23	pyrvinium	0.745	0.00072
24	astemizole	0.8	0.00074
25	geldanamycin	0.487	0.0008
26	terfenadine	0.92	0.00112
27	nortriptyline	0.834	0.00115
28	cloperastine	0.723	0.00121
29	amoxapine	0.766	0.00158
30	naloxone	0.699	0.00201
31	loperamide	0.699	0.00203
32	dipyridamole	0.698	0.00203
33	valproic acid	0.242	0.00216
34	tamoxifen	0.636	0.00253
35	fulvestrant	0.279	0.00278
36	fluspirilene	0.799	0.00306
37	deptropine	0.799	0.00306
38	phenoxybenzamine	0.785	0.0041
40	doxylamine	0.716	0.00421
41	hesperetin	0.712	0.00463
42	methotrexate	0.574	0.00499
43	ivermectin	0.704	0.00537
44	clorgiline	0.768	0.00561
45	methylbenzethonium chloride	0.646	0.00562
47	oxymetazoline	0.765	0.00579
48	tonzonium bromide	0.763	0.00599
50	glafenine	0.759	0.00637
51	zimeldine	0.695	0.00643
52	AG-013608	0.56	0.0067
53	withaferin A	0.754	0.00702
54	amiodarone	0.69	0.00715
56	benzethonium chloride	0.834	0.00919
58	oxybutynin	0.735	0.00971
61	chlorphenesin	0.726	0.0112
65	rottlerin	0.804	0.01516
67	perphenazine	0.647	0.01534
68	tribenoside	0.706	0.01556
70	puromycin	0.698	0.01721
71	oleandomycin	0.639	0.01758
74	ebselen	0.792	0.01839
75	clomifene	0.693	0.01852
78	dipivefrine	0.687	0.02035
80	rifabutin	0.781	0.02135
81	0297417-0002B	0.78	0.02139
83	perhexiline	0.683	0.02174
85	raubasine	0.677	0.02381
87	nitrofurantoin	0.618	0.02385
88	MS-275	0.892	0.02398
89	amprolium	0.618	0.02401
91	simvastatin	0.675	0.02447
93	paclitaxel	0.564	0.02525
94	piperacetazine	0.672	0.02554
96	etacrynic acid	0.752	0.03001
99	hexestrol	0.659	0.03135
100	clotrimazole	0.599	0.03146
101	alvespimycin	0.396	0.03161
102	niclosamide	0.599	0.03182
105	ethambutol	0.597	0.03276
106	5224221	0.872	0.03336
108	cinchocaine	0.593	0.0345
116	cortisone	0.725	0.04054
120	5707885	0.637	0.04245
121	clioquinol	0.577	0.04258
122	azaperone	0.635	0.04365
123	phenazopyridine	0.634	0.04416
124	tetrandrine	0.633	0.04464
125	cyproheptadine	0.572	0.0458
126	sulconazole	0.631	0.04625
127	monorden	0.282	0.04865
128	1,4-chrysenequinone	0.844	0.04911
129	lynestrenol	0.565	0.0496
Bupropion-300
rank	cmap name	enrichment	p
1	bupropion	1	0
2	8-azaguanine	0.925	4e-05
3	rimexolone	0.902	0.0001
4	hexestrol	0.894	0.0001
8	praziquantel	0.838	0.00107
11	procaine	0.746	0.00242
13	atropine	0.786	0.0041
15	fipexide	0.86	0.00527
16	camptothecin	0.858	0.00549
18	etamsylate	0.751	0.00734
19	cotinine	0.633	0.00737
22	pimethixene	0.839	0.00821
24	tremorine	0.74	0.00875
25	clobetasol	0.835	0.00901
27	chlorpromazine	0.364	0.00975
28	pimozide	0.734	0.00979
29	DL-thiorphan	0.926	0.01046
31	sitosterol	0.729	0.01076
33	ebselen	0.82	0.01166
35	amoxapine	0.658	0.0124
36	cyclopentolate	0.719	0.01267
37	nimesulide	0.715	0.01333
38	tolfenamic acid	0.711	0.01416
39	irinotecan	0.807	0.01434
40	ethaverine	0.71	0.01456
42	oxprenolol	0.709	0.01478
43	torasemide	0.704	0.01583
46	azaperone	0.696	0.01794
47	alfaxalone	0.792	0.01839
49	estriol	0.688	0.02001
51	nabumetone	0.683	0.02174
55	amiodarone	0.621	0.02291
57	cinnarizine	0.678	0.02349
59	quinidine	0.772	0.02374
60	ioversol	0.676	0.02417
62	phthalylsulfathiazole	0.617	0.02433
63	medrysone	0.566	0.02449
64	corbadrine	0.669	0.02654
65	scopolamine N-oxide	0.611	0.02679
66	etomidate	0.761	0.02722
67	repaglinide	0.665	0.02839
69	diltiazem	0.605	0.02942
70	levamisole	0.662	0.02974
71	aminocaproic acid	0.753	0.02995
72	fluphenazine	0.328	0.0318
75	parbendazole	0.651	0.03475
80	flavoxate	0.648	0.0365
81	cinoxacin	0.648	0.0368
82	sertaconazole	0.647	0.03702
83	dacarbazine	0.646	0.03776
84	Prestwick-967	0.646	0.03804
85	ioxaglic acid	0.731	0.03844
88	ellipticine	0.643	0.03943
90	etacrynic acid	0.728	0.03968
91	ipratropium bromide	0.725	0.04072
92	pargyline	0.638	0.04178
94	budesonide	0.634	0.0445
96	harmine	0.627	0.04828
98	carbachol	0.625	0.04933
99	oxymetazoline	0.625	0.04933
Captopril-300
rank	cmap name	enrichment	p
1	captopril	1	0
2	benzylpenicillin	0.846	0.0008
5	trichostatin A	0.14	0.00178
6	meticrane	0.762	0.00182
7	dirithromycin	0.899	0.002
9	tanespimycin	0.222	0.00328
10	Prestwick-1084	0.792	0.00364
13	pyrimethamine	0.699	0.00595
14	alvespimycin	0.472	0.00621
15	morantel	0.694	0.00663
17	ciprofibrate	0.749	0.0076
18	verteporfin	0.831	0.00957
19	oxolinic acid	0.674	0.00959
21	meglumine	0.727	0.0111
22	sulpiride	0.663	0.01145
23	octopamine	0.725	0.0115
24	3-acetylcoumarin	0.66	0.0122
25	pancuronium bromide	0.721	0.01221
26	piperidolate	0.816	0.01232
27	proxymetacaine	0.716	0.01325
29	oxantel	0.714	0.01349
30	dicycloverine	0.651	0.01442
31	retrorsine	0.709	0.01466
32	etifenin	0.709	0.01472
33	hydrocortisone	0.805	0.015
36	2,6-dimethylpiperidine	0.645	0.0158
39	atropine oxide	0.641	0.01714
40	norfloxacin	0.638	0.01762
41	tranylcypromine	0.63	0.01971
43	bacitracin	0.784	0.02049
44	alsterpaullone	0.783	0.02087
48	miconazole	0.622	0.02251
49	fenoprofen	0.572	0.02288
50	hyoscyamine	0.619	0.02359
52	dipivefrine	0.676	0.02401
53	amprolium	0.616	0.02463
54	phenazopyridine	0.673	0.02514
55	idoxuridine	0.614	0.02535
57	ifenprodil	0.67	0.02642
58	butacaine	0.666	0.02803
59	omeprazole	0.666	0.02813
60	sparteine	0.665	0.02823
62	fenoterol	0.756	0.02854
64	sulfadoxine	0.752	0.02999
65	pentamidine	0.599	0.03192
68	adrenosterone	0.655	0.0329
69	flupentixol	0.651	0.03499
70	mitoxantrone	0.737	0.03549
72	mevalolactone	0.736	0.03611
73	ranitidine	0.589	0.03611
74	ketorolac	0.642	0.04018
76	ketanserin	0.641	0.04056
78	lisinopril	0.723	0.04184
79	levodopa	0.576	0.0431
80	MS-275	0.85	0.04551
81	cefixime	0.63	0.04645
83	dexpropranolol	0.712	0.04675
84	difenidol	0.71	0.04751
85	citiolone	0.522	0.04785
86	remoxipride	0.628	0.04816
87	ronidazole	0.707	0.04938
88	karakoline	0.519	0.04944
Clomifene-300
rank	cmap name	enrichment	p
1	clomifene	1	0
2	pyrvinium	0.918	0
3	prochlorperazine	0.773	0
4	thioridazine	0.63	0
5	trifluoperazine	0.628	0
6	geldanamycin	0.605	0
7	tanespimycin	0.478	0
8	trichostatin A	0.422	0
9	LY-294002	0.397	0
10	fluspirilene	0.936	2e-05
11	suloctidil	0.933	4e-05
12	fluphenazine	0.521	4e-05
13	bepridil	0.912	6e-05
14	antimycin A	0.893	6e-05
16	puromycin	0.885	0.00018
17	thioguanosine	0.885	0.00018
18	phenoxybenzamine	0.881	0.00028
22	bisacodyl	0.843	0.00099
23	rottlerin	0.905	0.00174
26	mefloquine	0.756	0.00208
27	vorinostat	0.51	0.0021
30	medrysone	0.688	0.00238
31	sirolimus	0.272	0.00245
32	nortriptyline	0.807	0.00257
33	fulvestrant	0.281	0.00262
34	butoconazole	0.805	0.00269
35	protriptyline	0.793	0.00362
36	dequalinium chloride	0.788	0.00394
37	astemizole	0.719	0.00395
38	5707885	0.784	0.00412
40	cefalexin	0.713	0.00457
41	cloperastine	0.656	0.00495
43	corbadrine	0.768	0.00565
44	meptazinol	0.765	0.00581
46	carbamazepine	0.563	0.0063
47	8-azaguanine	0.754	0.00698
49	clemizole	0.688	0.00729
51	ivermectin	0.686	0.00767
53	metixene	0.746	0.0079
56	quinisocaine	0.743	0.00828
57	bezafibrate	0.742	0.00849
59	methylbenzethonium chloride	0.621	0.00914
60	progesterone	0.736	0.00939
61	clotrimazole	0.673	0.00979
63	metrifonate	0.669	0.01047
64	thiostrepton	0.73	0.01054
67	chlorprothixene	0.725	0.0115
68	oxantel	0.717	0.01309
70	econazole	0.714	0.01353
71	pimozide	0.713	0.01377
74	profenamine	0.708	0.01482
76	pentoxyverine	0.706	0.01538
77	alvespimycin	0.427	0.01577
78	sulconazole	0.701	0.01645
81	nimesulide	0.698	0.01719
83	prenylamine	0.697	0.01757
84	terfenadine	0.794	0.01773
85	tonzonium bromide	0.696	0.01776
87	withaferin A	0.694	0.0182
88	ouabain	0.693	0.0186
89	flupentixol	0.689	0.0195
91	rescinnamine	0.787	0.01955
92	chlorpromazine	0.339	0.01969
93	helveticoside	0.578	0.02004
94	resveratrol	0.478	0.0201
96	phenazopyridine	0.685	0.02117
97	perhexiline	0.683	0.0218
98	salbutamol	0.623	0.02221
100	norcyclobenzaprine	0.678	0.02322
102	alexidine	0.675	0.02461
106	proadifen	0.671	0.02564
107	labetalol	0.671	0.0258
109	anisomycin	0.671	0.02602
113	0297417-0002B	0.761	0.02708
114	sulfametoxydiazine	0.668	0.02711
115	(-)-isoprenaline	0.667	0.02729
117	desipramine	0.663	0.0292
118	CP-645525-01	0.753	0.02965
120	ebselen	0.751	0.03025
122	syrosingopine	0.66	0.03077
126	tiapride	0.597	0.03262
127	15-delta prostaglandin J2	0.357	0.03304
128	emetine	0.653	0.03372
129	doxepin	0.738	0.03537
132	propafenone	0.647	0.03686
133	dipyridamole	0.538	0.03734
135	levamisole	0.643	0.03949
137	cefsulodin	0.637	0.04245
138	amoxapine	0.577	0.04266
140	rifabutin	0.717	0.04455
141	latamoxef	0.717	0.04473
143	dextromethorphan	0.631	0.04585
145	nipecotic acid	0.63	0.04637
150	procaine	0.566	0.0494
151	niclosamide	0.565	0.0496
152	parthenolide	0.625	0.04965
Disopyramide-300
rank	cmap name	enrichment	p
1	disopyramide	1	0
2	glafenine	0.952	0
3	pergolide	0.908	8e-05
6	niflumic acid	0.874	0.00034
7	prednisolone	0.806	0.00062
8	finasteride	0.728	0.00107
9	gemfibrozil	0.775	0.00124
10	etiocholanolone	0.717	0.00147
12	bupivacaine	0.819	0.00193
16	dinoprostone	0.788	0.00394
17	enalapril	0.782	0.0042
20	fludrocortisone	0.576	0.00469
22	acemetacin	0.77	0.00539
24	sulfapyridine	0.767	0.00567
25	dyclonine	0.765	0.00579
26	6-bromoindirubin-3'-oxime	0.595	0.00653
27	nocodazole	0.637	0.00695
29	arecoline	0.749	0.00764
30	CAY-10397	0.843	0.00765
31	lobelanidine	0.748	0.00774
32	ribavirin	0.744	0.00802
33	pheniramine	0.681	0.00841
35	gabexate	0.736	0.00939
36	betulinic acid	0.732	0.01009
37	lidoflazine	0.828	0.01032
38	AR-A014418	0.827	0.01042
39	metolazone	0.669	0.01047
40	methoxamine	0.729	0.01064
43	pyrithyldione	0.719	0.01263
44	benzocaine	0.719	0.01267
46	5182598	0.915	0.01435
48	16-phenyltetranorprostaglandin E2	0.709	0.01472
50	indometacin	0.517	0.01607
51	diltiazem	0.644	0.01626
52	viomycin	0.702	0.01635
54	iopromide	0.696	0.01776
55	pentoxifylline	0.633	0.01902
56	pioglitazone	0.439	0.01921
58	perhexiline	0.689	0.01953
59	neostigmine bromide	0.689	0.01965
60	enilconazole	0.685	0.02117
61	rilmenidine	0.682	0.0218
62	amantadine	0.682	0.02184
63	benfluorex	0.682	0.0219
64	vinblastine	0.771	0.02398
67	ketotifen	0.675	0.02441
71	Y-27632	0.884	0.02746
74	chlorphenesin	0.657	0.03197
76	vinburnine	0.655	0.03298
78	raubasine	0.652	0.03432
79	harmol	0.649	0.03617
80	triprolidine	0.648	0.03634
81	nystatin	0.734	0.03668
83	sulfachlorpyridazine	0.587	0.03687
84	fenspiride	0.582	0.03949
88	PHA-00816795	0.856	0.04179
89	STOCK1N-35696	0.855	0.04243
93	adiphenine	0.577	0.04302
94	tolazoline	0.576	0.0431
95	PHA-00767505E	0.635	0.04372
99	adenosine phosphate	0.63	0.04677
100	mefexamide	0.625	0.04933
Ergocalciferol-300
rank	cmap name	enrichment	p
1	ergocalciferol	1	0
2	ceforanide	0.973	0
3	fluoxetine	0.956	0
5	cyclopentolate	0.875	0.00034
10	sulfaquinoxaline	0.883	0.00322
11	finasteride	0.665	0.00401
12	cefotiam	0.767	0.00567
13	bumetanide	0.76	0.00631
14	cisapride	0.757	0.00666
18	pilocarpine	0.734	0.00979
21	etynodiol	0.731	0.0104
22	pheneticillin	0.73	0.01046
23	nitrofural	0.728	0.01088
24	Prestwick-682	0.722	0.01204
26	letrozole	0.715	0.01329
27	propidium iodide	0.715	0.01335
28	mianserin	0.653	0.01374
29	atractyloside	0.647	0.01534
33	chlormezanone	0.7	0.01667
38	naproxen	0.479	0.01944
39	neostigmine bromide	0.688	0.02001
40	amikacin	0.684	0.02129
41	hesperidin	0.684	0.02154
42	melatonin	0.683	0.02174
43	Prestwick-967	0.682	0.02184
44	iloprost	0.776	0.02285
47	pivmecillinam	0.674	0.02471
49	dinoprost	0.671	0.02564
54	clemastine	0.753	0.02958
55	3-acetamidocoumarin	0.661	0.03
57	propranolol	0.66	0.03069
58	vancomycin	0.659	0.03105
62	canadine	0.652	0.03438
63	harmaline	0.651	0.03465
64	iohexol	0.651	0.03499
65	nicergoline	0.591	0.03515
67	5707885	0.645	0.03823
70	isotretinoin	0.64	0.0411
74	lynestrenol	0.575	0.04376
75	prednisone	0.575	0.04426
76	pimozide	0.632	0.04552
77	tridihexethyl	0.63	0.04645
79	triamcinolone	0.57	0.04682
Felodipine-300
rank	cmap name	enrichment	p
1	felodipine	0.984	0
2	8-azaguanine	0.914	4e-05
4	verteporfin	0.96	0.0001
5	phenoxybenzamine	0.887	0.00016
7	5224221	0.987	0.00032
9	hydrocortisone	0.936	0.00044
11	blebbistatin	0.98	0.0007
12	pyrvinium	0.742	0.00077
14	azacitidine	0.912	0.00142
15	0173570-0000	0.714	0.00153
16	tanespimycin	0.233	0.00176
18	rottlerin	0.893	0.00236
21	camptothecin	0.884	0.00318
25	clioquinol	0.705	0.00537
26	0175029-0000	0.644	0.00606
27	apigenin	0.762	0.00611
29	astemizole	0.697	0.00623
30	ketoprofen	0.641	0.00624
31	medrysone	0.641	0.00642
35	natamycin	0.746	0.00788
36	isoconazole	0.684	0.00807
39	rimexolone	0.739	0.00903
41	prochlorperazine	0.392	0.01013
43	flunarizine	0.727	0.01112
44	5248896	0.924	0.01127
45	thioridazine	0.349	0.01153
46	sulconazole	0.724	0.0116
48	5182598	0.918	0.01324
50	menadione	0.916	0.01392
51	repaglinide	0.709	0.01476
52	clorgiline	0.708	0.01482
53	levonorgestrel	0.593	0.01486
54	15-delta prostaglandin J2	0.385	0.0162
55	helveticoside	0.589	0.01625
57	digoxin	0.701	0.01651
59	mefloquine	0.642	0.01682
62	suloctidil	0.698	0.01711
64	dipyridamole	0.585	0.0176
65	alexidine	0.696	0.01776
66	securinine	0.695	0.01818
67	sulfamethoxypyridazine	0.635	0.01832
69	dioxybenzone	0.69	0.01928
70	lymecycline	0.686	0.02043
71	profenamine	0.686	0.02089
73	abamectin	0.68	0.02262
76	ioxaglic acid	0.771	0.02396
77	proscillaridin	0.771	0.02404
78	propylthiouracil	0.675	0.02453
79	procaine	0.615	0.02489
80	5252917	0.888	0.0261
81	bisacodyl	0.67	0.02642
83	lanatoside C	0.56	0.02733
85	trimipramine	0.664	0.02879
86	DL-thiorphan	0.879	0.02915
87	beta-escin	0.556	0.02926
88	azathioprine	0.514	0.02956
89	clemizole	0.604	0.0296
90	prenylamine	0.66	0.03069
91	ethaverine	0.659	0.03093
93	imipramine	0.648	0.03658
94	mebendazole	0.588	0.03663
97	harmine	0.645	0.03841
98	monobenzone	0.644	0.03873
102	methylbenzethonium chloride	0.533	0.04046
105	thioguanosine	0.637	0.04265
106	0297417-0002B	0.721	0.0427
107	chlorpromazine	0.307	0.04358
109	sanguinarine	0.85	0.04515
110	deptropine	0.631	0.04607
112	(-)-atenolol	0.628	0.04812
114	flunixin	0.568	0.04842
116	tracazolate	0.625	0.04955
Flunarizine-300
rank	cmap name	enrichment	p
1	flunarizine	1	0
3	talampicillin	0.908	8e-05
4	vorinostat	0.57	0.00032
5	pyrvinium	0.764	0.00046
6	disopyramide	0.841	0.00101
7	roxarsone	0.839	0.00105
9	trifluoperazine	0.459	0.00112
10	aceclofenac	0.825	0.00147
11	cortisone	0.904	0.00182
12	nipecotic acid	0.819	0.00189
13	trazodone	0.899	0.002
14	prochlorperazine	0.44	0.00239
15	felodipine	0.637	0.00246
16	antimycin A	0.718	0.00409
17	loperamide	0.661	0.00439
18	dequalinium chloride	0.775	0.00477
19	thioridazine	0.377	0.00492
20	furaltadone	0.651	0.00534
21	nitrofurantoin	0.688	0.00729
22	flupentixol	0.747	0.00782
23	cloperastine	0.63	0.00789
24	5248896	0.931	0.00893
28	ciclosporin	0.61	0.01091
29	glafenine	0.728	0.01092
30	canavanine	0.821	0.01146
32	clomifene	0.717	0.01309
33	morantel	0.653	0.01388
34	chlorprothixene	0.708	0.01488
37	kawain	0.648	0.01522
38	proadifen	0.706	0.01536
39	clioquinol	0.647	0.01536
40	methyldopa	0.643	0.01652
42	amiodarone	0.642	0.01694
43	doxepin	0.798	0.01699
44	risperidone	0.797	0.01721
46	bepridil	0.697	0.01763
47	bufexamac	0.691	0.01886
49	clemizole	0.631	0.01943
50	pentolonium	0.63	0.01979
51	pentoxyverine	0.687	0.02037
53	hydroflumethiazide	0.628	0.02061
54	aminoglutethimide	0.78	0.02139
56	tolazamide	0.774	0.02316
57	drofenine	0.678	0.02331
59	ursodeoxycholic acid	0.767	0.02534
60	pergolide	0.672	0.02538
62	florfenicol	0.67	0.0264
63	lincomycin	0.76	0.0274
65	5224221	0.88	0.02887
66	perhexiline	0.663	0.02934
69	dyclonine	0.657	0.03183
72	etamivan	0.655	0.03284
73	sulindac	0.507	0.03309
74	rolitetracycline	0.655	0.03312
75	trimethylcolchicinic acid	0.654	0.03358
76	pizotifen	0.653	0.03408
77	azathioprine	0.505	0.03419
78	quinostatin	0.87	0.03422
80	benzamil	0.542	0.03546
82	prenylamine	0.648	0.0364
83	syrosingopine	0.648	0.0365
84	methocarbamol	0.726	0.04032
85	artemisinin	0.725	0.04072
86	tonzonium bromide	0.639	0.0412
87	imipramine	0.639	0.04142
88	dl-alpha tocopherol	0.639	0.04152
90	atropine methonitrate	0.722	0.0421
91	protriptyline	0.637	0.04241
92	acetylsalicylsalicylic acid	0.636	0.04283
93	homochlorcyclizine	0.635	0.04365
94	cefotetan	0.719	0.04397
95	ethoxyquin	0.574	0.04454
96	pridinol	0.628	0.04776
97	pyridoxine	0.628	0.04808
98	carbamazepine	0.454	0.04906
99	betahistine	0.625	0.04933
101	5707885	0.624	0.04991
Fluphenazine-300
rank	cmap name	enrichment	p
1	fluphenazine	0.974	0
2	trifluoperazine	0.932	0
3	thioridazine	0.802	0
4	prochlorperazine	0.771	0
5	wortmannin	0.668	0
6	geldanamycin	0.653	0
7	trichostatin A	0.619	0
8	tanespimycin	0.449	0
9	LY-294002	0.362	0
10	astemizole	0.922	2e-05
11	loperamide	0.842	2e-05
12	vorinostat	0.686	2e-05
13	terfenadine	0.979	4e-05
14	pimozide	0.933	4e-05
15	piperacetazine	0.92	4e-05
16	mefloquine	0.91	4e-05
17	niclosamide	0.908	4e-05
18	perphenazine	0.895	4e-05
19	fluspirilene	0.908	8e-05
20	nortriptyline	0.896	0.0001
21	clomipramine	0.894	0.0001
22	15-delta prostaglandin J2	0.541	0.0002
23	sirolimus	0.318	0.00022
24	valproic acid	0.278	0.00024
25	suloctidil	0.88	0.0003
26	methylbenzethonium chloride	0.777	0.0003
27	resveratrol	0.65	0.0003
28	haloperidol	0.365	0.00032
29	withaferin A	0.873	0.00036
31	chlorprothixene	0.868	0.0004
32	alimemazine	0.86	0.00052
33	clozapine	0.475	0.00058
34	alvespimycin	0.54	0.00068
38	tetrandrine	0.831	0.00121
39	clomifene	0.831	0.00125
40	5707885	0.829	0.00131
41	metergoline	0.824	0.00151
43	cyproheptadine	0.763	0.00174
44	prenylamine	0.816	0.00213
46	quinisocaine	0.813	0.00237
47	metixene	0.809	0.00247
48	CP-645525-01	0.891	0.00248
49	clotrimazole	0.744	0.0025
51	amoxapine	0.74	0.0027
52	noretynodrel	0.802	0.0029
53	bepridil	0.8	0.003
56	rottlerin	0.88	0.00339
57	rifabutin	0.876	0.00357
58	pimethixene	0.874	0.00365
60	0297417-0002B	0.863	0.00477
61	trazodone	0.863	0.00481
62	albendazole	0.859	0.00531
65	benzethonium chloride	0.855	0.00585
67	phenoxybenzamine	0.762	0.00605
68	troglitazone	0.409	0.00618
69	tonzonium bromide	0.759	0.00631
71	thioproperazine	0.695	0.00649
72	methylprednisolone	0.757	0.00664
74	oxetacaine	0.691	0.00707
75	puromycin	0.753	0.00718
76	ciclopirox	0.749	0.00766
77	spiperone	0.937	0.00771
78	bufexamac	0.747	0.00786
79	mianserin	0.685	0.00789
80	nicergoline	0.684	0.00807
81	monensin	0.627	0.00826
83	gossypol	0.627	0.00832
84	pyrvinium	0.623	0.0088
85	mepacrine	0.931	0.00909
87	ciclosporin	0.617	0.00961
88	nordihydroguaiaretic acid	0.405	0.00983
89	blebbistatin	0.927	0.01022
90	propafenone	0.731	0.01034
92	perhexiline	0.727	0.01102
93	norcyclobenzaprine	0.726	0.01134
94	thiostrepton	0.716	0.01323
95	fendiline	0.813	0.01328
96	syrosingopine	0.714	0.01339
98	homochlorcyclizine	0.714	0.01349
99	disulfiram	0.651	0.01442
102	desipramine	0.707	0.01522
103	parthenolide	0.707	0.01528
105	quinostatin	0.911	0.01594
110	flupentixol	0.698	0.01731
111	deptropine	0.693	0.01852
112	labetalol	0.687	0.02035
113	miconazole	0.628	0.02055
115	fulvestrant	0.234	0.02147
116	diperodon	0.779	0.02177
117	metitepine	0.682	0.0219
118	mepyramine	0.681	0.02238
119	5224221	0.896	0.02249
120	pizotifen	0.679	0.02308
121	pirlindole	0.774	0.02314
122	ivermectin	0.619	0.02377
123	protriptyline	0.673	0.0251
124	ouabain	0.672	0.02524
126	semustine	0.668	0.02692
127	cloperastine	0.557	0.02876
129	epiandrosterone	0.661	0.03016
130	chlorcyclizine	0.551	0.03075
131	thapsigargin	0.749	0.03129
134	benzydamine	0.653	0.0339
135	Prestwick-981	0.741	0.03401
136	oxymetazoline	0.652	0.03445
137	azacyclonol	0.59	0.03579
138	tribenoside	0.648	0.03654
140	thiamazole	0.538	0.0374
141	rescinnamine	0.729	0.03908
142	butoconazole	0.643	0.03943
143	mometasone	0.641	0.04044
146	1,4-chrysenequinone	0.858	0.0411
147	nifenazone	0.579	0.04175
148	digitoxigenin	0.637	0.04245
149	acepromazine	0.637	0.04265
152	propranolol	0.633	0.04474
154	terconazole	0.633	0.04508
155	trimipramine	0.63	0.04663
156	quinidine	0.712	0.04665
157	lasalocid	0.63	0.04669
158	dosulepin	0.629	0.04709
159	dihydroergotamine	0.569	0.04724
160	MG-262	0.709	0.04831
161	ursolic acid	0.627	0.0485
162	hexetidine	0.626	0.04896
163	beta-escin	0.52	0.04897
164	amitriptyline	0.52	0.04918
166	BAS-012416453	0.706	0.04968
167	thiethylperazine	0.625	0.04971
Gabapentin-300
rank	cmap name	enrichment	p
1	gabapentin	1	0
2	corbadrine	0.939	2e-05
4	azlocillin	0.923	4e-05
5	amrinone	0.916	4e-05
6	propylthiouracil	0.907	8e-05
7	ebselen	0.955	0.0001
8	cetirizine	0.873	0.00036
11	lomefloxacin	0.745	0.00072
15	doxazosin	0.843	0.00099
16	quinidine	0.922	0.00104
17	natamycin	0.824	0.00151
18	theobromine	0.821	0.00179
20	rilmenidine	0.805	0.00271
21	abamectin	0.798	0.00314
24	aminocaproic acid	0.86	0.00527
25	tracazolate	0.762	0.00605
27	isoetarine	0.75	0.0075
33	Prestwick-685	0.674	0.00951
34	pridinol	0.733	0.00991
35	zomepirac	0.723	0.0117
37	ioversol	0.714	0.01359
38	meropenem	0.712	0.01396
39	praziquantel	0.711	0.01412
40	vidarabine	0.71	0.01444
44	sisomicin	0.7	0.01667
46	pipenzolate bromide	0.698	0.01731
47	Prestwick-860	0.697	0.01737
49	promethazine	0.697	0.01743
50	proxyphylline	0.695	0.01796
51	trazodone	0.791	0.01841
53	estriol	0.69	0.01928
54	isoconazole	0.63	0.02005
55	oleandomycin	0.629	0.02037
57	flunarizine	0.686	0.02089
59	betahistine	0.684	0.02148
60	milrinone	0.77	0.0244
61	bergenin	0.674	0.02471
64	ursodeoxycholic acid	0.757	0.0283
65	GW-8510	0.665	0.02861
66	digoxin	0.663	0.02906
68	amiodarone	0.603	0.0302
71	ramifenazone	0.657	0.03201
73	bemegride	0.656	0.03227
76	oxprenolol	0.653	0.03408
79	gliclazide	0.648	0.03654
82	pseudopelletierine	0.646	0.0374
83	riboflavin	0.646	0.03804
84	trimethadione	0.644	0.03873
87	flucytosine	0.642	0.04018
88	cefalotin	0.641	0.04044
89	phenylpropanolamine	0.641	0.04056
90	cyclizine	0.641	0.0406
94	methapyrilene	0.638	0.04193
96	levamisole	0.634	0.04416
97	eucatropine	0.527	0.04428
98	nomifensine	0.574	0.04454
99	N-acetyl-L-leucine	0.633	0.04482
100	sanguinarine	0.851	0.04499
101	famprofazone	0.526	0.04505
104	tolfenamic acid	0.629	0.04697
106	ginkgolide A	0.625	0.04957
Haloperidol-300
rank	cmap name	enrichment	p
1	astemizole	0.931	0
2	thioridazine	0.784	0
3	trifluoperazine	0.776	0
4	fluphenazine	0.69	0
5	prochlorperazine	0.671	0
6	geldanamycin	0.668	0
7	15-delta prostaglandin J2	0.605	0
8	haloperidol	0.553	0
9	trichostatin A	0.483	0
10	tanespimycin	0.453	0
11	loperamide	0.87	2e-05
12	vorinostat	0.677	2e-05
13	CP-645525-01	0.974	4e-05
14	metixene	0.929	4e-05
15	tetrandrine	0.925	4e-05
16	bepridil	0.92	4e-05
17	prenylamine	0.917	4e-05
19	nordihydroguaiaretic acid	0.574	4e-05
20	LY-294002	0.283	4e-05
21	niclosamide	0.853	0.00014
22	terfenadine	0.949	0.00016
23	pyrvinium	0.792	0.00018
24	withaferin A	0.883	0.00024
25	wortmannin	0.48	0.00024
26	clomipramine	0.866	0.00044
27	noretynodrel	0.863	0.00046
31	parthenolide	0.83	0.00127
32	mometasone	0.829	0.00129
33	mefloquine	0.774	0.0013
34	piperacetazine	0.828	0.00133
35	phenoxybenzamine	0.82	0.00185
37	suloctidil	0.814	0.00227
39	resveratrol	0.575	0.00238
40	perphenazine	0.74	0.00276
41	securinine	0.778	0.00458
43	helveticoside	0.659	0.00467
44	ciclopirox	0.775	0.00477
45	metergoline	0.773	0.00507
46	alvespimycin	0.475	0.00567
47	azathioprine	0.601	0.00573
48	doxepin	0.851	0.00627
51	metitepine	0.755	0.00688
52	sulindac	0.589	0.00733
53	thiostrepton	0.745	0.00796
55	tonzonium bromide	0.737	0.00937
57	buspirone	0.731	0.01034
58	butoconazole	0.726	0.01142
59	norcyclobenzaprine	0.722	0.01202
62	homochlorcyclizine	0.719	0.01263
63	5224221	0.918	0.01328
66	perhexiline	0.707	0.01528
67	MG-262	0.802	0.01584
68	hydroxyzine	0.638	0.01778
69	nortriptyline	0.693	0.01846
71	levomepromazine	0.689	0.01932
72	phenazopyridine	0.689	0.01965
75	fluspirilene	0.688	0.02001
77	rescinnamine	0.777	0.02245
78	chlorprothixene	0.679	0.02318
79	imipramine	0.671	0.02572
80	disulfiram	0.61	0.02716
81	nicergoline	0.609	0.02752
82	thioproperazine	0.607	0.02844
85	desipramine	0.66	0.0304
88	cyproheptadine	0.598	0.03214
89	glycopyrronium bromide	0.596	0.03324
90	calmidazolium	0.871	0.03374
91	oxyphenbutazone	0.653	0.0338
92	pergolide	0.653	0.03402
94	ivermectin	0.593	0.03473
95	pizotifen	0.651	0.03481
97	methylbenzethonium chloride	0.539	0.03671
99	benzethonium chloride	0.73	0.0387
100	fenbendazole	0.643	0.03911
102	profenamine	0.642	0.04018
103	protriptyline	0.637	0.04251
105	pirlindole	0.718	0.04425
107	hexetidine	0.634	0.0445
108	5707885	0.633	0.04474
110	josamycin	0.569	0.04738
112	pirenzepine	0.569	0.04748
113	Prestwick-981	0.709	0.04809
114	spiramycin	0.521	0.04861
Imipramine-300
rank	cmap name	enrichment	p
1	imipramine	1	0
2	cloperastine	0.893	0
3	thioridazine	0.597	0
4	tanespimycin	0.512	0
5	trichostatin A	0.465	0
6	prochlorperazine	0.591	2e-05
7	trifluoperazine	0.582	2e-05
8	thiostrepton	0.92	4e-05
9	geldanamycin	0.565	6e-05
10	vorinostat	0.615	8e-05
11	fluphenazine	0.493	0.00016
12	clozapine	0.499	0.0002
13	methylbenzethonium chloride	0.786	0.00022
15	amitriptyline	0.772	0.00034
17	helveticoside	0.764	0.00046
18	phenoxybenzamine	0.85	0.00072
20	chlorcyclizine	0.706	0.00173
21	clomifene	0.817	0.00199
22	astemizole	0.748	0.00236
23	nordihydroguaiaretic acid	0.446	0.00282
24	moxisylyte	0.728	0.00346
25	quinisocaine	0.782	0.00422
26	niclosamide	0.715	0.00435
27	norcyclobenzaprine	0.771	0.00539
29	resveratrol	0.536	0.00556
30	mefloquine	0.699	0.00587
31	valproic acid	0.221	0.00663
32	bepridil	0.752	0.0072
33	ivermectin	0.688	0.00729
34	noretynodrel	0.749	0.00764
35	tonzonium bromide	0.743	0.0082
36	mebendazole	0.682	0.00823
38	alvespimycin	0.458	0.00842
39	withaferin A	0.74	0.00871
41	oxetacaine	0.677	0.00897
42	flupentixol	0.739	0.00903
43	MS-275	0.93	0.0093
44	beta-escin	0.619	0.0094
45	clotrimazole	0.671	0.01013
46	terconazole	0.732	0.01034
47	8-azaguanine	0.726	0.01132
48	flunarizine	0.726	0.01132
49	perphenazine	0.663	0.0116
50	felodipine	0.563	0.0121
51	chlorprothixene	0.719	0.01259
52	strophanthidin	0.718	0.01299
54	desipramine	0.715	0.01335
55	nortriptyline	0.711	0.01428
56	15-delta prostaglandin J2	0.39	0.0143
57	glycopyrronium bromide	0.65	0.01452
58	dosulepin	0.709	0.01466
59	digoxin	0.706	0.01536
60	N-acetylmuramic acid	0.706	0.01544
61	alimemazine	0.705	0.01583
63	ciclosporin	0.589	0.01593
64	prenylamine	0.702	0.01637
66	loperamide	0.588	0.01659
68	protriptyline	0.688	0.01993
69	pimozide	0.687	0.02007
70	benzonatate	0.629	0.02011
71	suloctidil	0.687	0.02017
72	fluspirilene	0.686	0.02085
73	tetrandrine	0.683	0.02166
75	metergoline	0.679	0.02318
76	bisacodyl	0.678	0.02349
80	nicergoline	0.613	0.02611
83	trioxysalen	0.67	0.0264
84	econazole	0.666	0.02779
86	proadifen	0.664	0.02875
87	pyrvinium	0.556	0.02912
88	chlorpromazine	0.323	0.0293
89	promazine	0.555	0.02948
90	piperacetazine	0.661	0.02994
92	acetazolamide	0.658	0.03139
93	clomipramine	0.658	0.03157
95	clofazimine	0.592	0.03495
96	diethylstilbestrol	0.543	0.03496
97	doxepin	0.734	0.03688
98	mometasone	0.647	0.03702
99	pipenzolate bromide	0.647	0.0373
100	syrosingopine	0.646	0.0374
101	alexidine	0.645	0.03853
102	disulfiram	0.582	0.03979
103	promethazine	0.64	0.04076
104	5224221	0.856	0.04219
105	levomepromazine	0.635	0.04351
106	parthenolide	0.634	0.0445
108	atropine methonitrate	0.714	0.04599
109	nisoxetine	0.63	0.04637
110	CP-645525-01	0.712	0.04641
111	fenbendazole	0.63	0.04677
113	metixene	0.627	0.04828
Ketoprofen-300
rank	cmap name	enrichment	p
1	ketoprofen	1	0
3	medrysone	0.878	0
4	morantel	0.879	6e-05
5	meticrane	0.853	0.00014
6	carbachol	0.877	0.0003
8	clemizole	0.809	0.0006
9	8-azaguanine	0.835	0.00113
11	bromopride	0.721	0.00131
14	fosfosal	0.82	0.00183
17	apigenin	0.818	0.00195
20	cloperastine	0.678	0.003
21	flunarizine	0.797	0.00328
22	flucytosine	0.793	0.00364
25	trioxysalen	0.786	0.00402
27	cycloserine	0.781	0.0043
29	6-benzylaminopurine	0.712	0.00463
30	sulconazole	0.774	0.00497
31	fenbufen	0.645	0.00584
35	repaglinide	0.755	0.00688
36	ioversol	0.75	0.0075
37	aminohippuric acid	0.749	0.00766
38	fenoprofen	0.628	0.00822
39	flunixin	0.682	0.00823
40	sulfamethoxypyridazine	0.676	0.00933
41	cefalotin	0.732	0.01017
42	sanguinarine	0.925	0.01099
43	ethaverine	0.726	0.01126
45	luteolin	0.722	0.01204
46	bisacodyl	0.721	0.01227
49	demeclocycline	0.598	0.01375
51	meclofenoxate	0.588	0.01661
53	chrysin	0.792	0.01827
55	cetirizine	0.688	0.01969
57	heliotrine	0.579	0.01984
58	ethotoin	0.578	0.02004
59	etamsylate	0.687	0.02027
60	0179445-0000	0.506	0.02036
61	fenoterol	0.782	0.02109
63	gliclazide	0.682	0.0218
64	procaine	0.623	0.02221
67	lorglumide	0.618	0.02393
68	PNU-0230031	0.497	0.02403
69	lomefloxacin	0.566	0.02449
71	levamisole	0.674	0.02475
72	rolitetracycline	0.672	0.02538
73	zomepirac	0.67	0.02612
75	Prestwick-1084	0.666	0.02773
78	chlorzoxazone	0.663	0.02912
80	chlorpromazine	0.323	0.03002
84	profenamine	0.657	0.03201
85	pempidine	0.595	0.03386
87	gallamine triethiodide	0.59	0.03559
88	labetalol	0.649	0.03607
90	rimexolone	0.646	0.0374
91	aminocaproic acid	0.732	0.0377
93	propafenone	0.642	0.04018
97	eucatropine	0.531	0.04211
98	proxyphylline	0.638	0.04213
99	clomipramine	0.637	0.04265
102	doxazosin	0.632	0.04559
104	phenformin	0.486	0.04778
105	azlocillin	0.628	0.04812
109	ronidazole	0.707	0.04911
112	Prestwick-664	0.519	0.0496
113	N-acetyl-L-leucine	0.625	0.04971
Levonorgestrel-300
rank	cmap name	enrichment	p
1	levonorgestrel	0.998	0
3	fenoprofen	0.894	0
4	medrysone	0.879	0
5	GW-8510	0.916	4e-05
6	flunixin	0.891	6e-05
8	demeclocycline	0.821	8e-05
9	meclofenoxate	0.81	8e-05
10	tanespimycin	0.268	8e-05
11	apigenin	0.899	0.0001
12	8-azaguanine	0.886	0.00016
15	trichostatin A	0.152	0.00044
16	thioguanosine	0.864	0.00046
17	cloperastine	0.754	0.0005
18	equilin	0.814	0.00054
19	tropicamide	0.751	0.00058
20	rimexolone	0.85	0.00072
21	flumetasone	0.725	0.00113
23	camptothecin	0.906	0.00174
24	meticrane	0.752	0.00226
25	sulfamethoxypyridazine	0.747	0.0024
28	tracazolate	0.798	0.00314
29	lymecycline	0.797	0.00332
30	mitoxantrone	0.88	0.00337
33	phthalylsulfathiazole	0.723	0.00372
34	labetalol	0.788	0.00394
35	sulconazole	0.781	0.00428
36	etamsylate	0.78	0.00442
38	sulfametoxydiazine	0.766	0.00575
42	H-7	0.744	0.00806
43	chlorpromazine	0.369	0.00822
46	Prestwick-674	0.621	0.00916
47	flupentixol	0.737	0.00933
49	amoxicillin	0.736	0.00941
51	lorglumide	0.667	0.01073
53	eucatropine	0.608	0.01128
56	acetylsalicylic acid	0.422	0.0121
57	aminohippuric acid	0.719	0.01253
58	omeprazole	0.718	0.01281
59	cycloserine	0.718	0.01299
60	gliclazide	0.714	0.01359
61	butyl hydroxybenzoate	0.653	0.01382
62	sanguinarine	0.915	0.01435
65	methazolamide	0.707	0.01526
66	chrysin	0.804	0.01538
68	astemizole	0.642	0.01672
69	pancuronium bromide	0.699	0.01689
70	papaverine	0.699	0.01703
72	nitrendipine	0.636	0.0181
73	3-acetylcoumarin	0.636	0.01822
74	roxithromycin	0.693	0.01862
76	phenoxybenzamine	0.692	0.0188
77	norfloxacin	0.633	0.01894
80	eldeline	0.574	0.02209
81	pivampicillin	0.681	0.0221
83	0175029-0000	0.572	0.02286
84	doxorubicin	0.77	0.02414
85	ellipticine	0.675	0.02441
87	fludroxycortide	0.615	0.02519
89	famprofazone	0.563	0.02606
90	cyproterone	0.669	0.0266
92	pramocaine	0.606	0.02876
93	enilconazole	0.662	0.02974
95	metamizole sodium	0.553	0.03001
96	verteporfin	0.751	0.03067
98	STOCK1N-35215	0.749	0.03129
99	hexestrol	0.658	0.03171
100	mefloquine	0.599	0.03182
101	milrinone	0.746	0.03201
102	denatonium benzoate	0.656	0.03227
104	alsterpaullone	0.74	0.03457
106	piperidolate	0.736	0.03589
108	difenidol	0.734	0.03664
110	alpha-estradiol	0.338	0.03915
113	fluocinonide	0.582	0.03935
114	picrotoxinin	0.641	0.0406
115	bepridil	0.638	0.04205
116	budesonide	0.637	0.04227
119	alvespimycin	0.378	0.04568
122	Prestwick-1084	0.63	0.04637
123	phenindione	0.628	0.0479
124	fluvoxamine	0.626	0.0489
126	benfluorex	0.626	0.04916
127	sulfaphenazole	0.625	0.04943
Metformin-300
rank	cmap name	enrichment	p
1	metformin	0.982	0
2	Chicago Sky Blue 6B	0.867	0.0004
3	colistin	0.866	0.00044
4	Y-27632	0.969	0.00171
5	kaempferol	0.819	0.00193
8	SC-19220	0.792	0.00364
9	benzocaine	0.784	0.00412
10	diphenhydramine	0.709	0.00491
12	mephenytoin	0.758	0.00652
16	quercetin	0.612	0.01069
17	diprophylline	0.665	0.01119
18	3-acetamidocoumarin	0.723	0.01178
19	allantoin	0.661	0.01196
20	thioperamide	0.659	0.0123
23	flucloxacillin	0.719	0.01259
24	tinidazole	0.598	0.01369
26	isoetarine	0.698	0.01707
30	betamethasone	0.794	0.01801
32	ampicillin	0.692	0.01884
33	isoflupredone	0.784	0.02057
34	rolipram	0.681	0.0221
35	sulfadimethoxine	0.621	0.02273
36	nifedipine	0.527	0.02321
37	5224221	0.893	0.02372
39	iocetamic acid	0.675	0.02461
43	MG-262	0.755	0.02888
44	sisomicin	0.664	0.02888
46	amantadine	0.66	0.03058
47	mebhydrolin	0.657	0.03209
49	dapsone	0.598	0.03238
50	pentetic acid	0.597	0.03262
51	tacrine	0.655	0.03312
53	homatropine	0.592	0.03475
59	pregnenolone	0.643	0.03943
60	nefopam	0.582	0.03973
62	mestranol	0.642	0.03995
63	STOCK1N-35874	0.857	0.04123
65	meclocycline	0.633	0.04496
68	pilocarpine	0.628	0.04798
70	piperacillin	0.566	0.0494
71	sulindac	0.483	0.04994
Methyldopa-300
rank	cmap name	enrichment	p
1	methyldopa	1	0
2	sulfafurazole	0.934	0
3	clenbuterol	0.91	4e-05
4	rolitetracycline	0.875	0.00034
5	cefalexin	0.818	0.00044
6	metamizole sodium	0.757	0.0005
7	kinetin	0.85	0.00072
8	harmalol	0.925	0.00082
10	amiodarone	0.771	0.00138
11	testosterone	0.761	0.00184
12	aminophylline	0.805	0.00273
13	probucol	0.681	0.00276
14	clioquinol	0.727	0.00346
16	sulfinpyrazone	0.788	0.00394
17	imipenem	0.783	0.00414
18	trimetazidine	0.78	0.00438
20	sanguinarine	0.948	0.00495
23	apomorphine	0.706	0.00523
24	aminohippuric acid	0.767	0.00567
25	medrysone	0.64	0.00644
27	roxarsone	0.753	0.00718
28	xylazine	0.749	0.0076
29	aminophenazone	0.686	0.00775
33	octopamine	0.719	0.01253
35	pentoxyverine	0.713	0.01381
37	loperamide	0.594	0.01468
38	chloroquine	0.708	0.01492
39	luteolin	0.708	0.01498
40	bendroflumethiazide	0.591	0.01559
41	eucatropine	0.589	0.01593
42	pyridoxine	0.704	0.01603
43	methapyrilene	0.701	0.01645
45	sulfadimidine	0.585	0.01764
47	riboflavin	0.693	0.01862
48	probenecid	0.69	0.01928
49	alpha-estradiol	0.366	0.01979
50	thiocolchicoside	0.686	0.02063
51	serotonin	0.626	0.02111
52	enoxacin	0.683	0.02174
55	3-hydroxy-DL-kynurenine	0.568	0.02419
57	pancuronium bromide	0.674	0.02471
58	levamisole	0.674	0.02475
59	tobramycin	0.674	0.02479
60	dobutamine	0.673	0.02499
62	antimycin A	0.612	0.02639
63	oxolinic acid	0.61	0.02722
65	epivincamine	0.665	0.02823
66	dextromethorphan	0.659	0.03093
67	tetroquinone	0.659	0.03113
68	scopoletin	0.875	0.03135
69	tetryzoline	0.748	0.03157
70	tiratricol	0.657	0.03183
71	thioguanosine	0.657	0.03201
72	tremorine	0.656	0.03227
75	nisoxetine	0.652	0.03434
76	dipyridamole	0.543	0.03466
77	verteporfin	0.737	0.03573
78	cefsulodin	0.649	0.03591
79	proadifen	0.649	0.03628
81	bephenium hydroxynaphthoate	0.585	0.03801
82	levodopa	0.585	0.03801
83	phenoxybenzamine	0.645	0.03815
84	ginkgolide A	0.645	0.03823
85	galantamine	0.645	0.03847
88	fipexide	0.726	0.04032
89	flucytosine	0.641	0.04044
92	tolazamide	0.72	0.04355
94	rimexolone	0.63	0.04669
95	lorglumide	0.57	0.04702
96	protoveratrine A	0.629	0.04737
97	dacarbazine	0.628	0.04776
98	flavoxate	0.628	0.04816
Metixene-300
rank	cmap name	enrichment	p
1	metixene	1	0
2	helveticoside	0.887	0
3	trifluoperazine	0.76	0
4	prochlorperazine	0.672	0
5	thioridazine	0.641	0
6	trichostatin A	0.392	0
7	LY-294002	0.326	0
8	tanespimycin	0.289	0
9	chlorcyclizine	0.872	2e-05
10	methylbenzethonium chloride	0.871	2e-05
11	gossypol	0.837	2e-05
12	tetrandrine	0.918	4e-05
13	15-delta prostaglandin J2	0.58	4e-05
14	digoxin	0.901	0.0001
15	terconazole	0.898	0.0001
16	fluphenazine	0.504	0.0001
17	ciclopirox	0.885	0.00018
18	geldanamycin	0.545	0.0002
19	withaferin A	0.864	0.00046
21	protriptyline	0.856	0.00056
23	bisacodyl	0.849	0.00074
24	niclosamide	0.793	0.00086
25	rescinnamine	0.922	0.001
26	fluspirilene	0.836	0.00113
27	tonzonium bromide	0.831	0.00123
28	progesterone	0.828	0.00133
29	biotin	0.897	0.00214
30	colecalciferol	0.814	0.00231
32	chlorprothixene	0.812	0.00237
33	trimipramine	0.807	0.00257
35	5707885	0.798	0.00318
36	glycopyrronium bromide	0.73	0.00336
37	vorinostat	0.492	0.00357
40	epiandrosterone	0.787	0.00402
41	benzethonium chloride	0.862	0.00483
42	lanatoside C	0.657	0.00489
43	guanadrel	0.705	0.00525
44	pyrvinium	0.65	0.00542
45	dicloxacillin	0.767	0.00567
46	nortriptyline	0.761	0.00623
49	levomepromazine	0.755	0.00694
52	bepridil	0.749	0.0076
54	quinisocaine	0.747	0.00786
56	homochlorcyclizine	0.744	0.00804
58	dequalinium chloride	0.742	0.00849
59	perphenazine	0.676	0.00911
60	nordihydroguaiaretic acid	0.405	0.00971
62	profenamine	0.729	0.01068
63	cloperastine	0.608	0.01134
64	beta-escin	0.607	0.01142
66	strophanthidin	0.724	0.01158
67	clofilium tosylate	0.82	0.01168
68	CP-645525-01	0.819	0.01174
69	amiodarone	0.662	0.01182
70	(-)-MK-801	0.721	0.01213
71	piperacetazine	0.718	0.01307
73	thiostrepton	0.715	0.01333
74	digoxigenin	0.654	0.01354
75	fluoxetine	0.707	0.01518
77	metergoline	0.707	0.01526
80	zuclopenthixol	0.699	0.01701
81	prenylamine	0.698	0.01721
83	mefloquine	0.64	0.01734
85	5224221	0.906	0.01817
86	sirolimus	0.225	0.01885
87	terfenadine	0.788	0.01949
88	loperamide	0.579	0.01959
89	clofazimine	0.631	0.01967
90	trimethadione	0.687	0.02037
92	azlocillin	0.686	0.02085
93	methoxsalen	0.783	0.02091
94	wortmannin	0.344	0.02121
96	maprotiline	0.683	0.02174
98	perhexiline	0.676	0.02417
99	5155877	0.673	0.0251
105	naftifine	0.667	0.02737
106	clomipramine	0.666	0.02773
108	pirenperone	0.607	0.0285
111	orphenadrine	0.552	0.03035
114	pimethixene	0.744	0.03285
118	MG-262	0.741	0.03381
119	hexetidine	0.653	0.0339
121	desipramine	0.652	0.03445
122	astemizole	0.592	0.03483
123	phenoxybenzamine	0.649	0.03589
127	ouabain	0.644	0.03867
128	doxepin	0.729	0.03908
129	securinine	0.643	0.03923
130	parthenolide	0.642	0.03981
131	isoconazole	0.581	0.04029
132	pizotifen	0.641	0.04062
135	tiabendazole	0.639	0.04152
138	Prestwick-981	0.72	0.04351
140	chlorpromazine	0.307	0.04428
142	pimozide	0.63	0.04645
143	digitoxigenin	0.628	0.0479
145	suloctidil	0.626	0.04904
Naltrexone-300
rank	cmap name	enrichment	p
1	naltrexone	1	0
2	tanespimycin	0.346	0
3	trichostatin A	0.297	0
4	diazoxide	0.915	4e-05
5	doxylamine	0.867	8e-05
6	disulfiram	0.858	0.00012
9	isoniazid	0.736	0.00294
10	pindolol	0.734	0.00306
11	Prestwick-1080	0.794	0.00348
13	oxybenzone	0.789	0.00394
15	metitepine	0.783	0.00412
17	pralidoxime	0.771	0.00529
20	strophanthidin	0.761	0.00621
21	proadifen	0.751	0.00734
24	rifabutin	0.835	0.00895
25	bacitracin	0.832	0.00945
26	Prestwick-984	0.732	0.01009
28	iopamidol	0.729	0.01076
32	phenazone	0.818	0.01192
35	anisomycin	0.699	0.01683
36	cinchonine	0.695	0.0181
38	geldanamycin	0.379	0.01924
39	lycorine	0.628	0.02055
41	mafenide	0.622	0.02267
44	pronetalol	0.671	0.0258
46	zidovudine	0.67	0.0264
48	MS-275	0.883	0.02821
49	isoxicam	0.606	0.02862
50	meptazinol	0.664	0.02888
52	scriptaid	0.753	0.02965
54	hexetidine	0.659	0.03117
55	16,16-dimethylprostaglandin E2	0.748	0.03163
56	dicycloverine	0.596	0.03308
58	naringenin	0.648	0.0368
59	molindone	0.647	0.03692
60	proguanil	0.727	0.04002
61	ofloxacin	0.581	0.04027
62	alvespimycin	0.383	0.04099
63	melatonin	0.636	0.04275
65	monorden	0.284	0.04601
66	homosalate	0.625	0.04957
68	prednisone	0.565	0.04976
Nortriptyline-300
rank	cmap name	enrichment	p
1	nortriptyline	1	0
2	homochlorcyclizine	0.986	0
4	trifluoperazine	0.902	0
5	prochlorperazine	0.862	0
6	thioridazine	0.764	0
7	trichostatin A	0.573	0
8	fluphenazine	0.556	0
9	LY-294002	0.414	0
10	tanespimycin	0.39	0
11	pyrvinium	0.851	2e-05
12	cloperastine	0.851	2e-05
13	pimethixene	0.975	4e-05
14	fluspirilene	0.924	4e-05
16	vorinostat	0.611	8e-05
17	CP-645525-01	0.957	0.0001
18	trazodone	0.951	0.0001
19	phenoxybenzamine	0.903	0.0001
20	protriptyline	0.903	0.0001
21	sirolimus	0.325	0.00012
22	methylbenzethonium chloride	0.771	0.00034
23	15-delta prostaglandin J2	0.508	0.00042
24	orphenadrine	0.758	0.00048
25	bepridil	0.86	0.0005
28	proscillaridin	0.929	0.00064
29	econazole	0.853	0.0007
30	bufexamac	0.847	0.0008
31	astemizole	0.798	0.00082
33	phenazopyridine	0.841	0.00101
35	clemastine	0.92	0.00112
36	rottlerin	0.918	0.00114
38	piperacetazine	0.827	0.00143
40	withaferin A	0.822	0.00167
41	rifabutin	0.897	0.00216
42	mefloquine	0.754	0.00216
43	niclosamide	0.736	0.00294
44	geldanamycin	0.442	0.00318
45	norcyclobenzaprine	0.793	0.00354
46	valproic acid	0.231	0.00389
47	tetrandrine	0.787	0.00402
48	perphenazine	0.717	0.00417
50	kawain	0.712	0.00467
51	cortisone	0.86	0.00521
52	quinostatin	0.946	0.00557
54	ionomycin	0.85	0.00641
56	alvespimycin	0.469	0.00661
57	tretinoin	0.346	0.00708
58	fenbendazole	0.75	0.0075
59	perhexiline	0.747	0.00782
60	nordihydroguaiaretic acid	0.411	0.00807
61	0297417-0002B	0.84	0.00809
63	tonzonium bromide	0.743	0.0082
64	doxepin	0.836	0.00889
65	chlorprothixene	0.739	0.00889
66	quinisocaine	0.738	0.00907
67	promazine	0.615	0.01015
68	antimycin A	0.67	0.01029
69	thiostrepton	0.73	0.01046
71	dyclonine	0.727	0.01096
72	amitriptyline	0.61	0.011
74	desipramine	0.719	0.01253
76	flupentixol	0.717	0.01307
78	suloctidil	0.713	0.01365
79	dosulepin	0.713	0.01377
80	amiodarone	0.653	0.01382
81	loperamide	0.596	0.01422
83	hexestrol	0.699	0.01703
84	noretynodrel	0.698	0.01707
86	haloperidol	0.265	0.01789
87	pimozide	0.695	0.0181
88	clomipramine	0.694	0.01842
90	rescinnamine	0.791	0.01851
91	imipramine	0.691	0.01886
92	adrenosterone	0.688	0.01993
93	eucatropine	0.578	0.02032
94	puromycin	0.685	0.02109
95	ebselen	0.78	0.02157
96	guanfacine	0.624	0.02207
97	fluoxetine	0.681	0.02216
98	chlorcyclizine	0.573	0.02235
99	pirlindole	0.776	0.02269
100	propafenone	0.68	0.0228
101	menadione	0.895	0.02302
102	reserpine	0.771	0.02392
103	resveratrol	0.468	0.0244
105	carbamazepine	0.495	0.02473
106	progesterone	0.672	0.0252
107	MG-262	0.766	0.02564
110	deptropine	0.669	0.02656
111	proadifen	0.668	0.02688
112	5248896	0.884	0.02752
113	oxetacaine	0.609	0.02762
114	chlorpromazine	0.325	0.0283
116	monensin	0.555	0.0294
117	promethazine	0.662	0.02962
118	alexidine	0.662	0.02974
119	gossypol	0.554	0.02986
120	syrosingopine	0.661	0.03
121	prenylamine	0.661	0.03028
125	enilconazole	0.655	0.0329
126	verapamil	0.545	0.03397
127	meropenem	0.652	0.03432
128	clotrimazole	0.594	0.03434
129	terfenadine	0.739	0.03473
130	ifenprodil	0.65	0.03535
131	blebbistatin	0.868	0.03539
132	digitoxigenin	0.649	0.03628
133	nicergoline	0.586	0.03777
134	beta-escin	0.538	0.0379
135	cisapride	0.644	0.03863
136	fenofibrate	0.728	0.03958
137	chloropyramine	0.641	0.04062
140	lomustine	0.636	0.04291
141	aminoglutethimide	0.72	0.04335
142	carbachol	0.633	0.04496
144	isoconazole	0.572	0.04552
147	halcinonide	0.568	0.04806
148	amoxapine	0.567	0.04896
149	sulfasalazine	0.566	0.04928
150	alimemazine	0.625	0.04957
151	5253409	0.843	0.04958
Paroxetine-300
rank	cmap name	enrichment	p
1	paroxetine	1	0
2	nialamide	0.95	0
3	citalopram	0.943	0
5	CP-690334-01	0.877	0
6	trichostatin A	0.277	0
8	Prestwick-1100	0.885	0.00018
10	spiradoline	0.88	0.0003
11	quinethazone	0.873	0.00036
12	chlorambucil	0.85	0.00072
13	withaferin A	0.83	0.00127
14	santonin	0.827	0.00139
16	chlorcyclizine	0.698	0.00205
17	flutamide	0.743	0.00254
18	meticrane	0.727	0.00348
19	0175029-0000	0.669	0.00371
20	phenelzine	0.668	0.00371
21	ethotoin	0.667	0.00383
22	vorinostat	0.489	0.00385
24	solasodine	0.656	0.00495
26	PNU-0230031	0.566	0.00578
27	tinidazole	0.639	0.00661
28	apigenin	0.757	0.0067
30	0179445-0000	0.555	0.00742
31	guaifenesin	0.628	0.00816
34	levcycloserine	0.736	0.00939
35	alvespimycin	0.451	0.00946
36	camptothecin	0.824	0.01088
37	tanespimycin	0.201	0.0111
38	beta-escin	0.609	0.01122
39	fludroxycortide	0.664	0.01137
40	parbendazole	0.721	0.01229
41	CP-320650-01	0.53	0.01282
42	orphenadrine	0.601	0.01289
44	nordihydroguaiaretic acid	0.393	0.01344
45	0317956-0000	0.527	0.01352
48	sulconazole	0.711	0.01412
49	delsoline	0.71	0.01444
51	meclofenoxate	0.585	0.01754
52	idazoxan	0.697	0.01763
54	sanguinarine	0.906	0.01831
56	rifabutin	0.79	0.01867
57	Prestwick-1080	0.69	0.01922
58	benzylpenicillin	0.689	0.01932
59	milrinone	0.788	0.01937
61	methylbenzethonium chloride	0.571	0.0231
62	flunixin	0.619	0.02359
63	tolbutamide	0.526	0.02373
65	phthalylsulfathiazole	0.615	0.02493
67	liothyronine	0.671	0.02572
68	metacycline	0.668	0.02688
72	diethylstilbestrol	0.548	0.03242
74	tranylcypromine	0.591	0.03519
76	2,6-dimethylpiperidine	0.591	0.03533
77	bephenium hydroxynaphthoate	0.59	0.03549
79	alexidine	0.646	0.03752
80	heliotrine	0.537	0.03792
81	securinine	0.644	0.03879
83	sulfadoxine	0.721	0.04291
86	digoxin	0.635	0.04365
88	Prestwick-664	0.524	0.04652
89	alfuzosin	0.569	0.04724
90	mexiletine	0.522	0.04771
91	rolipram	0.628	0.04798
Prednisolone-300
rank	cmap name	enrichment	p
1	prednisolone	1	0
2	lisinopril	0.971	4e-05
3	bufexamac	0.918	4e-05
4	telenzepine	0.916	4e-05
5	bupivacaine	0.902	0.0001
6	econazole	0.893	0.00012
8	etynodiol	0.831	0.00121
9	alclometasone	0.823	0.00161
10	cephaeline	0.764	0.00168
11	alprostadil	0.641	0.00232
12	sulfacetamide	0.801	0.003
14	triflupromazine	0.78	0.00438
15	ethionamide	0.84	0.00803
16	meteneprost	0.742	0.00851
17	dropropizine	0.739	0.00903
18	hexetidine	0.738	0.00913
20	bumetanide	0.735	0.00963
21	risperidone	0.83	0.00988
22	15(S)-15-methylprostaglandin E2	0.733	0.01001
23	fludroxycortide	0.665	0.01127
26	lincomycin	0.807	0.01432
27	norethisterone	0.706	0.01556
29	nisoxetine	0.693	0.0186
30	streptozocin	0.684	0.02148
31	flavoxate	0.683	0.0218
32	mephenytoin	0.68	0.02246
33	clemastine	0.774	0.02316
35	disopyramide	0.673	0.02514
36	pinacidil	0.673	0.02514
39	lynestrenol	0.604	0.0296
40	vinblastine	0.753	0.02995
41	pilocarpine	0.657	0.03183
42	phensuximide	0.655	0.03284
43	aminophylline	0.654	0.03322
44	fluticasone	0.653	0.03402
45	megestrol	0.651	0.03489
49	pindolol	0.584	0.03881
50	tolazoline	0.581	0.04027
52	emetine	0.638	0.04213
53	kaempferol	0.636	0.04283
55	simvastatin	0.635	0.04337
57	ikarugamycin	0.714	0.04599
58	acemetacin	0.629	0.04752
Prochlorperazine-300
rank	cmap name	enrichment	p
1	homochlorcyclizine	0.958	0
2	prochlorperazine	0.857	0
3	geldanamycin	0.796	0
4	vorinostat	0.791	0
5	trifluoperazine	0.78	0
6	thioridazine	0.726	0
7	tanespimycin	0.623	0
8	fluphenazine	0.584	0
9	trichostatin A	0.502	0
10	LY-294002	0.398	0
11	15-delta prostaglandin J2	0.574	4e-05
12	astemizole	0.877	6e-05
13	mefloquine	0.867	8e-05
14	metixene	0.89	0.00014
15	tetrandrine	0.887	0.00016
16	ivermectin	0.831	0.00028
17	desipramine	0.875	0.00034
18	suloctidil	0.849	0.00074
19	amitriptyline	0.738	0.00085
20	disulfiram	0.785	0.00104
21	methylbenzethonium chloride	0.727	0.00109
22	perphenazine	0.775	0.0013
23	alvespimycin	0.518	0.00152
25	withaferin A	0.806	0.00263
26	terfenadine	0.883	0.0032
27	phenoxybenzamine	0.794	0.00348
28	niclosamide	0.724	0.00366
29	wortmannin	0.404	0.0037
30	doxylamine	0.724	0.00372
31	tonzonium bromide	0.775	0.00483
32	chlorprothixene	0.775	0.00487
33	gossypol	0.65	0.00544
34	strophanthidin	0.764	0.00585
35	clozapine	0.398	0.00613
36	rifabutin	0.85	0.00631
37	nordihydroguaiaretic acid	0.419	0.00675
38	rescinnamine	0.846	0.00711
39	5707885	0.749	0.00762
40	5224221	0.937	0.00763
41	nortriptyline	0.749	0.00764
42	troglitazone	0.398	0.00822
43	bepridil	0.743	0.00828
44	loperamide	0.627	0.00828
[truncated: 142 more rows]

## Sheet: B
The similarity drugs obtained from cMap online tool with 28 drugs whose signature length was 500.
Aminocaproic Acid-500	cmap name	enrichment	p
rank	aminocaproic acid	1	0
1	alfadolone	0.959	0.0001
3	apigenin	0.897	0.0001
4	rimexolone	0.895	0.0001
5	atropine methonitrate	0.95	0.00012
6	GW-8510	0.88	0.0003
7	medrysone	0.762	0.00046
8	meticrane	0.811	0.0006
10	chrysin	0.922	0.00104
12	amiodarone	0.774	0.0013
13	enilconazole	0.802	0.00294
16	estriol	0.795	0.00346
18	proxymetacaine	0.792	0.00366
19	nipecotic acid	0.791	0.00372
20	N-acetyl-L-leucine	0.789	0.00392
22	lorglumide	0.708	0.00503
23	ursodeoxycholic acid	0.856	0.00563
25	sanguinarine	0.945	0.00573
26	omeprazole	0.764	0.00587
27	alpha-estradiol	0.408	0.0062
28	thioguanosine	0.752	0.0072
29	luteolin	0.747	0.00786
30	scopoletin	0.935	0.00803
31	8-azaguanine	0.735	0.00965
33	liothyronine	0.728	0.01086
35	hexestrol	0.723	0.01164
36	ketorolac	0.714	0.01339
39	sulfamethoxypyridazine	0.655	0.0134
40	aminohippuric acid	0.714	0.01359
41	harmine	0.713	0.01377
42	natamycin	0.712	0.01385
43	repaglinide	0.712	0.01396
44	alsterpaullone	0.804	0.0153
48	proxyphylline	0.706	0.01544
49	bisacodyl	0.704	0.01583
50	ipratropium bromide	0.801	0.016
51	remoxipride	0.701	0.01651
52	talampicillin	0.698	0.01707
53	morantel	0.64	0.01726
54	ethaverine	0.697	0.01757
55	denatonium benzoate	0.693	0.01852
56	Prestwick-685	0.634	0.01874
57	pirlindole	0.784	0.02067
58	levonorgestrel	0.577	0.02072
59	camptothecin	0.78	0.02157
60	ginkgolide A	0.68	0.02246
62	milrinone	0.771	0.02398
63	Prestwick-1084	0.676	0.02433
64	oxprenolol	0.674	0.02471
65	Prestwick-920	0.672	0.02554
67	roxarsone	0.669	0.02654
70	methocarbamol	0.76	0.02742
71	tiabendazole	0.666	0.02813
72	acetylsalicylic acid	0.386	0.02841
73	deptropine	0.662	0.02952
76	articaine	0.751	0.03031
78	piribedil	0.658	0.03171
80	phthalylsulfathiazole	0.594	0.0343
81	Prestwick-981	0.739	0.03497
82	verteporfin	0.737	0.03573
84	gliquidone	0.649	0.03599
85	mephenesin	0.589	0.03617
86	tyloxapol	0.648	0.03654
87	dioxybenzone	0.647	0.03702
88	octopamine	0.645	0.03847
89	chlorpromazine	0.313	0.03877
90	apramycin	0.644	0.03893
91	eucatropine	0.536	0.03899
92	cycloserine	0.636	0.04269
97	bufexamac	0.635	0.04365
98	pentolonium	0.574	0.04432
99	clioquinol	0.572	0.04564
100	berberine	0.631	0.04625
101	cinoxacin	0.626	0.04916
106	phenoxybenzamine	0.625	0.04957
108
Aminophylline-500	cmap name	enrichment	p
rank	aminophylline	1	0
1	ganciclovir	0.964	0
2	sulconazole	0.924	4e-05
3	pyrazinamide	0.924	4e-05
4	esculin	0.898	0.0001
5	luteolin	0.876	0.00034
6	nisoxetine	0.82	0.00183
10	ginkgolide A	0.82	0.00185
11	betahistine	0.817	0.00199
12	nizatidine	0.816	0.00217
13	mephenesin	0.753	0.00226
14	tracazolate	0.806	0.00265
15	testosterone	0.737	0.0029
16	epiandrosterone	0.802	0.00294
17	cefalexin	0.726	0.00352
18	hydralazine	0.67	0.00356
19	sulfachlorpyridazine	0.719	0.00397
20	vidarabine	0.784	0.00412
21	metamizole sodium	0.662	0.00433
22	pentoxyverine	0.78	0.0044
24	lorglumide	0.713	0.00459
25	fluorocurarine	0.778	0.00464
26	cloperastine	0.656	0.00493
28	acetylsalicylic acid	0.446	0.00649
30	simvastatin	0.758	0.00654
31	atovaquone	0.847	0.00693
32	halcinonide	0.691	0.00707
33	drofenine	0.747	0.00786
35	pridinol	0.744	0.00806
36	amphotericin B	0.74	0.00873
37	phthalylsulfathiazole	0.665	0.01111
41	harmalol	0.823	0.01112
42	crotamiton	0.724	0.01162
43	alpha-estradiol	0.386	0.01177
44	8-azaguanine	0.721	0.01221
46	ketorolac	0.721	0.01229
47	piromidic acid	0.72	0.01247
48	dimethadione	0.719	0.01267
49	apigenin	0.71	0.01436
52	talampicillin	0.709	0.01466
53	paracetamol	0.709	0.01476
54	cinoxacin	0.708	0.01492
55	milrinone	0.804	0.01524
56	remoxipride	0.702	0.01625
57	dextromethorphan	0.702	0.01637
58	estriol	0.7	0.01677
59	morantel	0.636	0.01816
60	capsaicin	0.695	0.01818
61	progesterone	0.692	0.01876
62	flurbiprofen	0.629	0.02041
63	bezafibrate	0.685	0.02103
66	mexiletine	0.576	0.02121
67	megestrol	0.68	0.02246
68	riluzole	0.622	0.02251
69	roxarsone	0.68	0.0226
70	trichlormethiazide	0.677	0.02373
72	rimexolone	0.675	0.02451
74	acacetin	0.566	0.02459
75	hexestrol	0.671	0.0258
78	chrysin	0.764	0.02622
79	torasemide	0.67	0.02626
80	sulfamethoxypyridazine	0.611	0.02679
81	urapidil	0.668	0.02682
82	fludroxycortide	0.61	0.02687
83	nitrendipine	0.61	0.02704
84	heliotrine	0.56	0.02713
85	clebopride	0.667	0.02741
86	(-)-MK-801	0.664	0.02879
87	xylazine	0.664	0.02896
88	famprofazone	0.55	0.03133
90	cefuroxime	0.659	0.03135
91	Prestwick-920	0.657	0.03201
92	prasterone	0.656	0.03227
93	nifurtimox	0.651	0.03465
94	(-)-atenolol	0.649	0.03591
95	tobramycin	0.646	0.03752
98	imidurea	0.732	0.0377
99	apramycin	0.645	0.03841
100	mebendazole	0.583	0.03893
101	enoxacin	0.643	0.03899
102	terguride	0.466	0.04
103	tranylcypromine	0.581	0.04015
104	colistin	0.641	0.04062
105	tiabendazole	0.635	0.04337
107	sulfaquinoxaline	0.719	0.04367
109	metaraminol	0.633	0.04474
111	aminohippuric acid	0.633	0.04496
112	pirenzepine	0.573	0.04518
113	flunarizine	0.632	0.04552
114	norethisterone	0.631	0.04625
115	dequalinium chloride	0.63	0.04677
116	florfenicol	0.629	0.04737
117	pentolonium	0.569	0.04794
118	ursodeoxycholic acid	0.708	0.04861
119
Amoxapine-500.xls	cmap name	enrichment	p
rank	amoxapine	1	0
1	cloperastine	0.905	0
2	prochlorperazine	0.631	0
3	thioridazine	0.559	0
4	trichostatin A	0.343	0
5	LY-294002	0.33	0
6	tanespimycin	0.308	0
7	trifluoperazine	0.575	4e-05
9	astemizole	0.864	8e-05
11	methylbenzethonium chloride	0.8	0.00012
12	phenoxybenzamine	0.865	0.00046
14	apigenin	0.864	0.00046
15	8-azaguanine	0.851	0.00072
17	dequalinium chloride	0.846	0.0008
18	pyrvinium	0.734	0.00097
19	sirolimus	0.285	0.00114
20	chlorpromazine	0.431	0.0012
21	mefloquine	0.771	0.00138
23	vorinostat	0.517	0.00166
25	0297417-0002B	0.906	0.00174
26	fluphenazine	0.419	0.00215
27	syrosingopine	0.814	0.00231
28	wortmannin	0.405	0.00352
32	cyproheptadine	0.725	0.0036
33	norcyclobenzaprine	0.792	0.00368
35	luteolin	0.78	0.00436
37	levonorgestrel	0.659	0.00467
39	nortriptyline	0.769	0.00549
40	niclosamide	0.693	0.00679
44	quinisocaine	0.751	0.00742
45	bepridil	0.747	0.00786
47	oxetacaine	0.68	0.00849
50	repaglinide	0.738	0.00907
53	alexidine	0.738	0.00923
54	dilazep	0.674	0.00951
55	loperamide	0.618	0.00953
57	alvespimycin	0.446	0.0106
58	prenylamine	0.729	0.01082
59	bisacodyl	0.722	0.01204
61	perphenazine	0.658	0.01246
64	diltiazem	0.658	0.01254
65	ebselen	0.815	0.01256
66	perhexiline	0.718	0.01281
67	Prestwick-685	0.657	0.01298
68	imipramine	0.716	0.01325
69	suloctidil	0.715	0.01333
70	heliotrine	0.598	0.01353
71	promazine	0.597	0.01398
72	terfenadine	0.805	0.015
75	CP-645525-01	0.802	0.01578
77	trioxysalen	0.705	0.01578
78	rottlerin	0.795	0.01749
80	amiodarone	0.636	0.01806
82	piperlongumine	0.905	0.01853
83	clomipramine	0.688	0.01993
84	skimmianine	0.682	0.0218
90	quinostatin	0.895	0.02272
94	fluspirilene	0.678	0.02331
95	trazodone	0.769	0.02468
96	protriptyline	0.67	0.02612
98	doxazosin	0.67	0.02632
99	budesonide	0.668	0.02715
100	camptothecin	0.76	0.02742
101	verteporfin	0.757	0.0285
105	pimozide	0.664	0.02871
106	spiperone	0.881	0.02875
107	0175029-0000	0.554	0.02984
108	0179445-0000	0.484	0.02991
109	hexestrol	0.66	0.03046
110	chlorcyclizine	0.552	0.03051
111	propafenone	0.654	0.03364
114	thioguanosine	0.652	0.03426
115	acepromazine	0.651	0.03481
116	disulfiram	0.59	0.03565
117	halcinonide	0.589	0.03607
118	tonzonium bromide	0.648	0.03658
120	cinchocaine	0.584	0.03867
122	clomifene	0.635	0.04345
127	clioquinol	0.573	0.04486
128	mebendazole	0.572	0.0454
130	antimycin A	0.57	0.04682
132
Benzocaine-500	cmap name	enrichment	p
rank	benzocaine	1	0
1	amantadine	0.944	0
3	adiphenine	0.931	0
4	viomycin	0.924	4e-05
6	felbinac	0.923	4e-05
7	biperiden	0.912	4e-05
8	thiamphenicol	0.87	8e-05
9	nadolol	0.873	0.00036
11	nystatin	0.935	0.00044
12	vancomycin	0.853	0.0007
13	gentamicin	0.85	0.00072
14	PHA-00745360	0.657	0.00076
15	monensin	0.741	0.00077
16	Prestwick-692	0.847	0.0008
17	sulfadimethoxine	0.79	0.0009
18	canadine	0.831	0.00123
19	iodixanol	0.905	0.00174
21	Prestwick-691	0.904	0.0018
22	thioperamide	0.755	0.00208
23	CP-320650-01	0.611	0.00217
24	finasteride	0.684	0.00246
25	diphenhydramine	0.733	0.00312
29	chlorogenic acid	0.798	0.00318
30	arecoline	0.795	0.00346
33	meclocycline	0.793	0.00358
35	fludrocortisone	0.586	0.00365
36	levopropoxyphene	0.787	0.004
37	iohexol	0.784	0.00412
39	disopyramide	0.783	0.00414
40	isoflupredone	0.865	0.00461
43	lasalocid	0.774	0.00491
46	Gly-His-Lys	0.86	0.00527
47	midodrine	0.7	0.00581
48	meteneprost	0.76	0.00627
50	diphenylpyraline	0.641	0.00636
52	CP-863187	0.757	0.00662
54	isocorydine	0.754	0.00706
58	etiocholanolone	0.636	0.00709
59	thiethylperazine	0.751	0.00734
60	thapsigargin	0.843	0.00753
61	Prestwick-682	0.729	0.01076
65	iopromide	0.724	0.01158
66	metampicillin	0.652	0.01416
77	rilmenidine	0.705	0.01583
81	naringenin	0.704	0.01597
82	mebhydrolin	0.703	0.01615
83	leflunomide	0.701	0.01641
84	nomegestrol	0.798	0.01691
86	merbromin	0.641	0.01698
88	hycanthone	0.691	0.019
91	guanabenz	0.631	0.01967
92	Prestwick-983	0.786	0.01995
93	lisuride	0.62	0.02307
96	meclofenamic acid	0.616	0.02471
98	methyldopate	0.672	0.0252
99	trimethobenzamide	0.611	0.02667
101	aciclovir	0.56	0.02713
103	CP-944629	0.667	0.02729
104	benzathine benzylpenicillin	0.667	0.02751
105	vigabatrin	0.758	0.02798
106	lovastatin	0.664	0.02879
107	ribavirin	0.663	0.02934
110	dihydroergocristine	0.662	0.02958
111	oxyphenbutazone	0.66	0.03077
113	colistin	0.659	0.03093
114	fluoxetine	0.659	0.03117
115	chlorhexidine	0.597	0.03258
118	betulinic acid	0.655	0.03268
119	pyrithyldione	0.652	0.03434
121	streptozocin	0.651	0.03465
122	iproniazid	0.582	0.03949
130	Chicago Sky Blue 6B	0.642	0.0401
132	yohimbic acid	0.726	0.04028
133	josamycin	0.581	0.04029
134	tolmetin	0.64	0.0411
136	5194442	0.638	0.04221
137	penbutolol	0.716	0.04489
144
Bethanechol-500	cmap name	enrichment	p
rank	bethanechol	1	0
1	phensuximide	0.982	0
2	cyclic adenosine monophosphate	0.951	0
3	niflumic acid	0.936	2e-05
7	prednicarbate	0.982	4e-05
8	ritodrine	0.85	0.00072
11	(+)-chelidonine	0.83	0.00127
12	alpha-yohimbine	0.913	0.00138
13	vincamine	0.683	0.00258
16	PNU-0230031	0.595	0.00293
17	anisomycin	0.796	0.00338
18	pioglitazone	0.509	0.00346
19	risperidone	0.87	0.00403
20	S-propranolol	0.771	0.00525
22	biotin	0.857	0.00551
23	dropropizine	0.766	0.00577
24	enilconazole	0.759	0.00631
25	coralyne	0.751	0.00734
28	rilmenidine	0.731	0.01038
32	nilutamide	0.731	0.0104
33	cobalt chloride	0.825	0.01078
34	ambroxol	0.728	0.01094
35	androsterone	0.727	0.01102
36	Prestwick-1083	0.815	0.01244
37	carteolol	0.713	0.01373
38	flucloxacillin	0.713	0.01377
39	timolol	0.707	0.01526
40	ioxaglic acid	0.798	0.01691
42	nomegestrol	0.796	0.01733
43	deptropine	0.695	0.01796
44	quinpirole	0.688	0.01975
46	nimesulide	0.688	0.01981
47	naftifine	0.683	0.02166
48	metampicillin	0.622	0.02253
49	mesalazine	0.621	0.02273
50	foliosidine	0.572	0.02288
51	zaprinast	0.677	0.02381
52	tribenoside	0.672	0.02554
54	betulin	0.761	0.02722
55	thioperamide	0.606	0.02862
57	bumetanide	0.654	0.03322
60	STOCK1N-35874	0.871	0.03386
61	PF-00539745-00	0.737	0.03547
62	AG-012559	0.737	0.03561
63	0198306-0000	0.646	0.03776
65	5255229	0.853	0.0434
70	ceftazidime	0.714	0.04571
72	tiratricol	0.632	0.04579
73	etamivan	0.63	0.04677
75	etomidate	0.711	0.04697
76	clomipramine	0.628	0.0479
77
Bromocriptine-500	cmap name	enrichment	p
rank	bromocriptine	0.998	0
1	thioridazine	0.712	0
2	trifluoperazine	0.683	0
3	sirolimus	0.638	0
4	prochlorperazine	0.632	0
5	trichostatin A	0.624	0
6	LY-294002	0.608	0
7	wortmannin	0.547	0
8	tanespimycin	0.471	0
9	resveratrol	0.727	2e-05
10	vorinostat	0.668	2e-05
11	fluphenazine	0.521	4e-05
12	pimozide	0.894	0.0001
13	nortriptyline	0.888	0.00016
14	astemizole	0.845	0.0002
15	mefloquine	0.833	0.00028
18	quinostatin	0.983	0.00054
19	latamoxef	0.928	0.00066
21	cloperastine	0.731	0.00101
22	propafenone	0.838	0.00107
23	terfenadine	0.915	0.00124
24	pyrvinium	0.718	0.00139
26	bepridil	0.825	0.00147
27	fulvestrant	0.289	0.00186
30	loperamide	0.695	0.00209
31	fluspirilene	0.814	0.00231
32	geldanamycin	0.452	0.00234
33	tonzonium bromide	0.813	0.00237
34	antimycin A	0.746	0.0024
35	methylbenzethonium chloride	0.685	0.00246
37	syrosingopine	0.805	0.00273
38	deptropine	0.799	0.00312
39	zimeldine	0.731	0.00318
40	hesperetin	0.726	0.00352
41	methotrexate	0.585	0.00377
42	amoxapine	0.722	0.00382
43	oxetacaine	0.708	0.00501
46	phenoxybenzamine	0.772	0.00515
48	naloxone	0.653	0.00522
49	clorgiline	0.765	0.00581
50	AG-013608	0.563	0.0063
51	puromycin	0.753	0.00718
52	amiodarone	0.69	0.00719
53	dipyridamole	0.634	0.00727
54	glafenine	0.745	0.00798
55	benzethonium chloride	0.84	0.00801
56	withaferin A	0.74	0.00875
58	ebselen	0.827	0.01052
62	cyproheptadine	0.668	0.01067
63	ivermectin	0.666	0.01099
64	oleandomycin	0.658	0.0124
68	paclitaxel	0.591	0.01553
73	rottlerin	0.8	0.01638
75	etacrynic acid	0.796	0.01733
76	clomipramine	0.694	0.0183
81	simvastatin	0.688	0.02001
82	cyproterone	0.685	0.02109
84	perphenazine	0.624	0.02195
85	cortisone	0.777	0.02231
86	alvespimycin	0.407	0.02455
90	0297417-0002B	0.768	0.0249
92	perhexiline	0.669	0.02656
95	monastrol	0.487	0.02864
96	valproic acid	0.19	0.02886
97	chlorphenesin	0.663	0.02912
99	clomifene	0.662	0.02988
102	phenazopyridine	0.66	0.03046
103	tribenoside	0.659	0.03129
105	tolfenamic acid	0.656	0.03256
107	5224221	0.873	0.03257
108	rifabutin	0.744	0.03277
109	raubasine	0.651	0.03475
110	ciclosporin	0.543	0.03476
111	tetrandrine	0.648	0.0364
113	dipivefrine	0.646	0.0378
114	suloctidil	0.645	0.03815
115	ethambutol	0.581	0.03991
116	practolol	0.642	0.0401
117	nabumetone	0.642	0.04018
118	semustine	0.641	0.04062
119	lynestrenol	0.578	0.04211
121	isoconazole	0.578	0.04246
122	amprolium	0.574	0.04464
123	5707885	0.632	0.04559
125	alexidine	0.631	0.04621
127	prenylamine	0.631	0.04625
128	azacyclonol	0.57	0.04704
130	1,4-chrysenequinone	0.847	0.04732
131	monorden	0.282	0.04787
134	dydrogesterone	0.624	0.04983
137
Bupropion-500	cmap name	enrichment	p
rank	bupropion	1	0
1	trichostatin A	0.293	0
2	8-azaguanine	0.912	6e-05
3	rimexolone	0.894	0.0001
5	DL-thiorphan	0.985	0.0004
7	hexestrol	0.853	0.0007
10	fipexide	0.926	0.00076
11	carbachol	0.816	0.00211
13	phthalylsulfathiazole	0.753	0.00226
14	triflusal	0.894	0.00234
15	fluphenazine	0.416	0.00241
16	clomipramine	0.808	0.00253
17	camptothecin	0.888	0.0028
18	sirolimus	0.266	0.00323
20	vinpocetine	0.781	0.00434
21	estriol	0.777	0.00471
22	praziquantel	0.773	0.00501
23	quinidine	0.854	0.00597
27	etamsylate	0.756	0.00682
29	medrysone	0.636	0.00713
31	chlorpromazine	0.374	0.00722
32	LY-294002	0.211	0.00725
33	amodiaquine	0.752	0.00726
34	imipenem	0.749	0.00764
35	atropine	0.746	0.00792
38	etamivan	0.743	0.00841
40	azlocillin	0.742	0.00847
41	Prestwick-1084	0.736	0.00949
43	etomidate	0.829	0.0101
45	azaperone	0.731	0.0104
46	phenoxybenzamine	0.722	0.01188
49	cyclopentolate	0.719	0.01247
52	luteolin	0.713	0.01363
54	ginkgolide A	0.713	0.01373
55	fosfosal	0.708	0.01488
57	guanethidine	0.803	0.01562
58	procaine	0.646	0.01562
59	tolfenamic acid	0.704	0.01599
61	bisacodyl	0.701	0.01639
62	dacarbazine	0.694	0.01842
66	ethaverine	0.692	0.01876
68	chrysin	0.775	0.02303
74	methazolamide	0.678	0.02322
75	hydrocotarnine	0.678	0.02331
76	irinotecan	0.77	0.0244
77	cinoxacin	0.674	0.02471
78	sulfamethoxypyridazine	0.607	0.0282
81	sertaconazole	0.66	0.03046
84	tomatidine	0.66	0.03069
86	methylprednisolone	0.657	0.03209
88	alpha-estradiol	0.347	0.03211
89	propafenone	0.656	0.03223
90	tremorine	0.654	0.03322
91	pimozide	0.649	0.03599
92	oxymetazoline	0.647	0.03686
93	sanguinarine	0.865	0.0369
94	diltiazem	0.586	0.03739
95	thioguanosine	0.646	0.03798
97	ebselen	0.732	0.03802
98	trazodone	0.731	0.03846
99	pimethixene	0.725	0.04054
104	ioxaglic acid	0.723	0.04184
105	tretinoin	0.287	0.04263
106	bepridil	0.636	0.04283
107	methacholine chloride	0.709	0.04819
111	ioversol	0.627	0.04828
112
Captopril-500	cmap name	enrichment	p
rank	captopril	1	0
1	Prestwick-1084	0.868	0.0004
2	tanespimycin	0.231	0.00192
4	fenoprofen	0.689	0.0023
6	fursultiamine	0.808	0.00253
7	verteporfin	0.876	0.00357
8	flunixin	0.724	0.00372
9	azaperone	0.786	0.00406
11	pyrimethamine	0.702	0.00557
15	sulpiride	0.7	0.00585
16	dirithromycin	0.853	0.00601
17	procainamide	0.754	0.00706
19	ronidazole	0.845	0.00725
20	alvespimycin	0.455	0.00874
22	ciprofibrate	0.738	0.00909
24	metoprolol	0.738	0.00917
25	dicycloverine	0.671	0.01015
29	ranitidine	0.669	0.01053
30	diflunisal	0.66	0.01204
32	ifenprodil	0.721	0.01231
33	sparteine	0.718	0.01281
34	benzylpenicillin	0.718	0.01297
35	meglumine	0.714	0.01349
36	protriptyline	0.706	0.0153
37	pancuronium bromide	0.704	0.01597
40	fenoterol	0.799	0.01669
41	prednisone	0.642	0.01672
42	pentamidine	0.64	0.01724
43	chloropyrazine	0.698	0.01725
44	piribedil	0.696	0.01776
47	bacitracin	0.794	0.01801
48	tranylcypromine	0.634	0.01864
49	butacaine	0.689	0.01932
50	mitoxantrone	0.786	0.01987
51	hydrochlorothiazide	0.629	0.02037
52	piperidolate	0.779	0.02183
54	etodolac	0.623	0.02219
55	cyanocobalamin	0.68	0.02246
56	cefixime	0.678	0.02335
57	oxantel	0.673	0.02503
60	dexpropranolol	0.764	0.02608
62	bacampicillin	0.67	0.02612
63	cortisone	0.763	0.0267
65	sulfamonomethoxine	0.667	0.02725
68	alsterpaullone	0.76	0.02748
69	AG-013608	0.488	0.02786
70	naringenin	0.666	0.02813
71	N-acetylmuramic acid	0.665	0.02839
73	solanine	0.665	0.02863
75	hydrocortisone	0.756	0.02866
76	sulfadoxine	0.754	0.02942
77	budesonide	0.662	0.02982
78	monobenzone	0.661	0.03
79	metamizole sodium	0.552	0.03031
80	troleandomycin	0.66	0.0304
81	hyoscyamine	0.602	0.0305
82	levodopa	0.597	0.0329
84	ketotifen	0.654	0.03364
86	alfaxalone	0.741	0.03379
88	difenidol	0.738	0.03519
90	karakoline	0.541	0.03564
91	isoxsuprine	0.588	0.03625
92	syrosingopine	0.647	0.03712
93	nialamide	0.642	0.0403
94	remoxipride	0.636	0.04275
96	octopamine	0.634	0.04434
97	proxymetacaine	0.627	0.04828
98	rimexolone	0.627	0.04828
99	tiratricol	0.625	0.04957
101
Clomifene-500	cmap name	enrichment	p
rank	clomifene	1	0
1	pyrvinium	0.92	0
2	prochlorperazine	0.797	0
3	trifluoperazine	0.646	0
4	thioridazine	0.64	0
5	fluphenazine	0.602	0
6	trichostatin A	0.442	0
7	tanespimycin	0.416	0
8	LY-294002	0.394	0
9	suloctidil	0.934	2e-05
10	vorinostat	0.659	2e-05
11	fluspirilene	0.93	4e-05
13	sirolimus	0.345	4e-05
15	puromycin	0.911	6e-05
16	antimycin A	0.892	6e-05
17	rottlerin	0.952	0.0001
18	nortriptyline	0.903	0.0001
21	bepridil	0.901	0.0001
22	valproic acid	0.29	0.00016
23	protriptyline	0.875	0.00034
25	geldanamycin	0.504	0.0005
26	imipramine	0.856	0.00056
27	mefloquine	0.78	0.0011
29	lysergol	0.833	0.00117
30	thioguanosine	0.832	0.00119
32	phenoxybenzamine	0.829	0.00129
33	cloperastine	0.711	0.00167
36	astemizole	0.743	0.00254
39	terfenadine	0.874	0.00365
40	carbamazepine	0.581	0.00413
41	pentoxyverine	0.769	0.00553
44	bezafibrate	0.759	0.00631
46	ivermectin	0.692	0.00691
48	procaine	0.692	0.00691
49	methylbenzethonium chloride	0.633	0.00739
50	corbadrine	0.751	0.00746
51	flupentixol	0.748	0.00774
52	fulvestrant	0.257	0.00822
54	pimozide	0.74	0.00875
56	quinisocaine	0.739	0.00897
57	0297417-0002B	0.832	0.00951
58	cefalexin	0.674	0.00959
59	withaferin A	0.73	0.01048
60	thiostrepton	0.729	0.01056
61	ebselen	0.825	0.01074
62	perhexiline	0.724	0.0116
63	sulconazole	0.714	0.01353
66	amiodarone	0.652	0.01398
68	syrosingopine	0.71	0.01436
69	alvespimycin	0.429	0.01513
70	acepromazine	0.705	0.01574
72	clemizole	0.645	0.01596
73	methylergometrine	0.7	0.01677
75	wortmannin	0.351	0.01731
76	tonzonium bromide	0.697	0.01733
77	prenylamine	0.697	0.01737
78	alexidine	0.697	0.01743
79	nimesulide	0.696	0.0177
81	quinostatin	0.907	0.01801
82	clotrimazole	0.635	0.0184
84	econazole	0.688	0.02001
85	norcyclobenzaprine	0.686	0.02043
86	piperacetazine	0.681	0.02216
87	15-delta prostaglandin J2	0.373	0.02233
88	5707885	0.68	0.0228
90	trazodone	0.775	0.02293
91	clorgiline	0.676	0.02421
94	aminophenazone	0.612	0.02627
98	CP-645525-01	0.76	0.02738
100	clioquinol	0.6	0.03138
104	amoxapine	0.598	0.03238
105	5224221	0.873	0.03245
106	nipecotic acid	0.655	0.03298
107	pimethixene	0.743	0.03313
108	dextromethorphan	0.653	0.0338
110	proadifen	0.652	0.03434
111	helveticoside	0.544	0.03444
112	tyloxapol	0.65	0.03583
116	chlorpromazine	0.315	0.03646
119	cetirizine	0.648	0.0365
120	dipyridamole	0.538	0.03734
121	niclosamide	0.583	0.03903
124	chlorcyclizine	0.533	0.04034
125	doxylamine	0.58	0.04071
126	latamoxef	0.724	0.04132
127	digoxin	0.639	0.0416
128	cephaeline	0.576	0.04348
131	bufexamac	0.633	0.04474
133	clomipramine	0.633	0.04496
134	resveratrol	0.435	0.04532
136	fenoterol	0.714	0.04567
138	blebbistatin	0.849	0.04585
139	haloperidol	0.237	0.04673
141	propafenone	0.629	0.04737
142	disulfiram	0.567	0.04886
144	loperamide	0.52	0.04889
145	emetine	0.626	0.04896
146	chlorprothixene	0.626	0.04904
147	cortisone	0.706	0.04968
148
Disopyramide-500	cmap name	enrichment	p
rank	disopyramide	1	0
1	pergolide	0.919	4e-05
3	fludrocortisone	0.704	0.00018
4	pioglitazone	0.553	0.00102
6	etiocholanolone	0.721	0.00131
7	oxymetazoline	0.827	0.00139
8	finasteride	0.711	0.00165
10	sulfachlorpyridazine	0.734	0.00306
15	dinoprostone	0.795	0.00344
16	acemetacin	0.795	0.00348
17	benzocaine	0.79	0.0039
21	sulfamonomethoxine	0.788	0.00398
22	viomycin	0.785	0.0041
23	midodrine	0.717	0.00413
25	iohexol	0.777	0.00471
27	tocainide	0.771	0.00539
28	streptozocin	0.768	0.00565
29	pyrithyldione	0.765	0.00579
30	methoxamine	0.757	0.0066
32	ribavirin	0.754	0.00698
34	sulfapyridine	0.747	0.00786
36	gabexate	0.746	0.00792
37	rilmenidine	0.745	0.00794
38	6-bromoindirubin-3'-oxime	0.583	0.00846
39	iopromide	0.742	0.00851
40	betulinic acid	0.741	0.00859
41	naftifine	0.738	0.00913
42	glafenine	0.731	0.01038
45	gelsemine	0.728	0.01092
46	5194442	0.725	0.01156
47	arecoline	0.721	0.01229
49	indometacin	0.53	0.01282
50	dehydrocholic acid	0.656	0.0131
52	amantadine	0.716	0.01325
53	etamivan	0.707	0.01522
56	diltiazem	0.646	0.01554
57	lobelanidine	0.705	0.0157
58	vancomycin	0.705	0.01583
59	fluoxetine	0.703	0.01615
60	aceclofenac	0.693	0.01862
65	Prestwick-682	0.689	0.01963
67	tolazoline	0.625	0.02169
69	gemfibrozil	0.622	0.02267
72	pentoxifylline	0.619	0.02377
73	sulmazole	0.771	0.0239
74	vinblastine	0.771	0.02404
75	isocorydine	0.675	0.02447
76	dyclonine	0.67	0.02612
78	mebhydrolin	0.668	0.02682
79	STOCK1N-35696	0.885	0.0272
80	PHA-00816795	0.882	0.02837
81	prednisolone	0.605	0.02942
83	myosmine	0.554	0.02984
86	vinburnine	0.661	0.03028
88	nystatin	0.749	0.03123
90	raubasine	0.659	0.03129
91	chlortetracycline	0.595	0.0337
94	adenosine phosphate	0.65	0.03565
95	metolazone	0.584	0.03855
99	bupivacaine	0.643	0.03949
100	cloxacillin	0.638	0.04172
103	mephenytoin	0.635	0.04327
104	niflumic acid	0.632	0.04552
105	PHA-00767505E	0.631	0.04615
106	tolnaftate	0.571	0.04618
107	nilutamide	0.629	0.04709
108	carbenoxolone	0.628	0.04808
110	AR-A014418	0.707	0.04911
112	azapropazone	0.706	0.04992
113
Ergocalciferol-500	cmap name	enrichment	p
rank	ergocalciferol	1	0
1	ceforanide	0.993	0
2	troglitazone	0.546	0.0001
4	pilocarpine	0.883	0.00024
5	cinchonine	0.832	0.00117
6	dinoprost	0.829	0.00129
7	pivmecillinam	0.819	0.00193
8	fluoxetine	0.775	0.00487
9	cefotiam	0.768	0.00559
12	lovastatin	0.766	0.00573
13	cisapride	0.766	0.00575
14	imidurea	0.855	0.00585
15	cefotetan	0.83	0.00981
20	etynodiol	0.733	0.01001
21	Prestwick-1082	0.828	0.01032
22	quinidine	0.827	0.01038
23	naproxen	0.504	0.01151
24	triamcinolone	0.661	0.01192
25	atractyloside	0.659	0.0123
26	ciclopirox	0.721	0.01231
27	nitrofural	0.716	0.01325
29	letrozole	0.71	0.01444
30	heptaminol	0.65	0.01452
31	melatonin	0.695	0.01796
35	7-aminocephalosporanic acid	0.694	0.01824
36	3-acetamidocoumarin	0.691	0.019
38	diethylstilbestrol	0.58	0.01935
39	neostigmine bromide	0.684	0.02129
42	tranexamic acid	0.624	0.02205
43	cefotaxime	0.619	0.02373
45	vancomycin	0.676	0.02401
46	oxolamine	0.666	0.02779
52	Chicago Sky Blue 6B	0.665	0.02851
53	doxepin	0.756	0.02854
54	metrizamide	0.665	0.02861
55	propidium iodide	0.664	0.02871
56	naftifine	0.663	0.02934
57	cefamandole	0.658	0.03165
59	lansoprazole	0.653	0.03408
61	sulmazole	0.736	0.03609
62	pergolide	0.648	0.03658
63	vanoxerine	0.643	0.03949
66	podophyllotoxin	0.642	0.04018
67	5707885	0.64	0.04088
68	triflupromazine	0.64	0.04088
69	homatropine	0.574	0.0444
72	niflumic acid	0.63	0.04637
73
Felodipine-500	cmap name	enrichment	p
rank	felodipine	0.992	0
1	trichostatin A	0.194	0
2	5224221	0.993	4e-05
3	8-azaguanine	0.929	4e-05
4	medrysone	0.811	8e-05
6	verteporfin	0.95	0.00012
7	rottlerin	0.94	0.00028
8	pyrvinium	0.745	0.00072
10	blebbistatin	0.979	0.00076
12	meticrane	0.784	0.00104
15	hydrocortisone	0.921	0.00106
16	0173570-0000	0.72	0.00133
17	5248896	0.965	0.00207
20	azacitidine	0.897	0.00214
21	clioquinol	0.75	0.00234
22	phenoxybenzamine	0.808	0.00255
23	camptothecin	0.882	0.00324
24	propylthiouracil	0.794	0.00354
25	ketoprofen	0.654	0.00518
28	astemizole	0.706	0.00519
29	bisacodyl	0.756	0.00676
34	sulconazole	0.755	0.00694
35	dioxybenzone	0.743	0.00824
40	chlorpromazine	0.368	0.00854
41	levonorgestrel	0.614	0.01021
45	cloperastine	0.612	0.01079
47	lanatoside C	0.605	0.01196
49	thioridazine	0.348	0.01205
50	dipyridamole	0.602	0.01247
52	mebendazole	0.655	0.01326
53	rimexolone	0.713	0.01377
56	natamycin	0.711	0.01428
57	thioguanosine	0.709	0.0148
58	flunarizine	0.702	0.01635
62	clorgiline	0.699	0.01701
66	withaferin A	0.695	0.0181
67	Prestwick-674	0.583	0.0181
68	clemizole	0.633	0.01896
69	securinine	0.69	0.01932
70	N-acetyl-L-leucine	0.689	0.01936
71	alexidine	0.688	0.01969
72	prochlorperazine	0.366	0.01979
74	digoxin	0.688	0.01981
75	isoconazole	0.629	0.02011
76	fluocinonide	0.626	0.02145
77	trioxysalen	0.684	0.02148
78	(-)-atenolol	0.683	0.0217
79	mefloquine	0.619	0.02359
81	digitoxigenin	0.677	0.02367
82	suloctidil	0.677	0.02373
83	15-delta prostaglandin J2	0.368	0.02483
84	rolitetracycline	0.674	0.02485
85	abamectin	0.671	0.02586
87	luteolin	0.671	0.02588
88	0175029-0000	0.563	0.02604
89	niclosamide	0.612	0.02643
90	5252917	0.885	0.02732
91	MG-262	0.761	0.02732
92	menadione	0.884	0.02773
93	helveticoside	0.557	0.02839
94	imipramine	0.664	0.02871
95	daunorubicin	0.662	0.02988
97	5182598	0.878	0.03002
98	trimipramine	0.661	0.03016
99	napelline	0.657	0.03201
100	ethotoin	0.548	0.03258
101	bephenium hydroxynaphthoate	0.594	0.03404
102	monobenzone	0.649	0.03599
105	dequalinium chloride	0.647	0.03686
107	oxaprozin	0.539	0.03713
108	sanguinarine	0.86	0.03941
110	procaine	0.582	0.03961
112	Y-27632	0.858	0.0407
115	ouabain	0.639	0.04152
116	methylbenzethonium chloride	0.532	0.04166
117	tanespimycin	0.173	0.04166
118	lymecycline	0.636	0.04291
120	pempidine	0.577	0.04302
121	5253409	0.854	0.04308
122	famprofazone	0.529	0.04309
123	proscillaridin	0.716	0.04523
124	roxithromycin	0.632	0.04559
125	pimethixene	0.71	0.04797
127	ellipticine	0.627	0.04858
129	STOCK1N-35215	0.708	0.04865
130
Flunarizine-500	cmap name	enrichment	p
rank	flunarizine	1	0
1	trichostatin A	0.433	0
5	drofenine	0.938	2e-05
6	pyrvinium	0.855	2e-05
7	prochlorperazine	0.588	2e-05
8	vorinostat	0.609	8e-05
9	valproic acid	0.297	0.0001
10	LY-294002	0.261	0.0002
11	thioridazine	0.458	0.00022
12	trifluoperazine	0.496	0.0003
13	disopyramide	0.875	0.00034
14	imipramine	0.851	0.00072
17	guanfacine	0.783	0.00104
18	clomifene	0.837	0.00109
19	antimycin A	0.763	0.00178
21	cortisone	0.899	0.00204
24	glafenine	0.806	0.00265
25	trazodone	0.887	0.00284
26	hydroflumethiazide	0.716	0.00433
27	econazole	0.775	0.00477
28	dyclonine	0.769	0.00555
30	nortriptyline	0.759	0.00631
31	pimethixene	0.846	0.00711
33	dequalinium chloride	0.749	0.0076
34	flupentixol	0.746	0.0079
35	triprolidine	0.744	0.00806
36	astemizole	0.682	0.00827
37	tiabendazole	0.743	0.00834
38	profenamine	0.74	0.00871
39	homochlorcyclizine	0.74	0.00875
40	pilocarpine	0.735	0.00979
42	octopamine	0.731	0.0104
43	sulfadimidine	0.606	0.01162
45	pentoxyverine	0.718	0.01299
46	cloperastine	0.598	0.01357
47	ciclosporin	0.597	0.01379
48	promethazine	0.712	0.01385
49	aceclofenac	0.712	0.01412
50	amiodarone	0.651	0.01442
51	aminoglutethimide	0.806	0.01462
52	epiandrosterone	0.701	0.01643
54	enalapril	0.698	0.01707
55	gossypol	0.586	0.01708
56	sulfanilamide	0.696	0.01776
58	ursodeoxycholic acid	0.793	0.01807
59	sulfafurazole	0.632	0.01916
60	dosulepin	0.69	0.0192
61	pergolide	0.69	0.01932
62	niclosamide	0.63	0.01971
64	benzamil	0.573	0.02257
66	sulfadoxine	0.773	0.02356
67	chloroquine	0.677	0.02357
68	N-acetylmuramic acid	0.677	0.02373
69	metitepine	0.669	0.02678
72	felodipine	0.516	0.02836
73	imipenem	0.664	0.02879
74	metrifonate	0.604	0.0296
75	clebopride	0.658	0.03157
76	nisoxetine	0.657	0.03183
77	etamivan	0.656	0.03235
78	risperidone	0.741	0.03383
79	syrosingopine	0.652	0.03434
80	sirolimus	0.209	0.03642
82	betazole	0.587	0.03693
83	ivermectin	0.584	0.03839
84	cefotetan	0.723	0.04152
85	prenylamine	0.637	0.04245
86	salsolidin	0.635	0.04372
87	triamterene	0.572	0.0456
88	methylbenzethonium chloride	0.524	0.0468
89	monensin	0.522	0.04779
90	protriptyline	0.626	0.04896
91	loperamide	0.52	0.049
92	atropine methonitrate	0.707	0.04938
93	lincomycin	0.705	0.04996
94
Fluphenazine-500	cmap name	enrichment	p
rank	fluphenazine	0.989	0
1	astemizole	0.944	0
2	mefloquine	0.941	0
3	trifluoperazine	0.937	0
4	thioridazine	0.826	0
5	prochlorperazine	0.792	0
6	vorinostat	0.716	0
7	geldanamycin	0.716	0
8	trichostatin A	0.663	0
9	wortmannin	0.653	0
10	15-delta prostaglandin J2	0.595	0
11	clozapine	0.583	0
12	sirolimus	0.514	0
13	LY-294002	0.476	0
14	tanespimycin	0.436	0
15	valproic acid	0.326	0
16	niclosamide	0.926	2e-05
17	perphenazine	0.922	2e-05
18	terfenadine	0.979	4e-05
19	fluspirilene	0.928	4e-05
20	nortriptyline	0.919	4e-05
21	pimozide	0.914	4e-05
22	haloperidol	0.385	8e-05
23	suloctidil	0.904	0.0001
24	bepridil	0.896	0.0001
25	methylbenzethonium chloride	0.8	0.00012
26	alimemazine	0.892	0.00014
27	piperacetazine	0.878	0.0003
28	ivermectin	0.829	0.00032
29	metergoline	0.871	0.00038
30	puromycin	0.847	0.00076
31	loperamide	0.744	0.00077
32	withaferin A	0.846	0.0008
34	clomipramine	0.84	0.00103
35	fulvestrant	0.301	0.00104
36	metixene	0.831	0.00121
41	clomifene	0.827	0.00139
42	chlorprothixene	0.821	0.00179
43	nicergoline	0.761	0.00188
44	CP-645525-01	0.902	0.0019
45	prenylamine	0.818	0.00195
46	gossypol	0.696	0.00209
47	nordihydroguaiaretic acid	0.454	0.00224
48	rifabutin	0.892	0.00238
49	5707885	0.809	0.00247
50	amoxapine	0.737	0.00294
52	pimethixene	0.883	0.00322
53	albendazole	0.882	0.00324
54	quinisocaine	0.793	0.00358
55	noretynodrel	0.789	0.0039
57	0297417-0002B	0.869	0.00411
58	tetrandrine	0.783	0.00412
59	parthenolide	0.78	0.00444
61	cyproheptadine	0.713	0.00459
62	ciclopirox	0.777	0.00464
64	troglitazone	0.418	0.00465
65	phenoxybenzamine	0.771	0.00539
68	bromocriptine	0.7	0.00585
69	thiostrepton	0.759	0.00631
70	spiperone	0.94	0.0068
71	bufexamac	0.754	0.00702
74	pyrvinium	0.634	0.00725
75	rottlerin	0.843	0.00759
76	methylprednisolone	0.745	0.00794
77	oxetacaine	0.684	0.00803
78	trazodone	0.837	0.00863
80	clotrimazole	0.677	0.00893
81	disulfiram	0.675	0.00937
82	fendiline	0.832	0.00953
83	ionomycin	0.831	0.00965
84	ciclosporin	0.617	0.00971
85	mianserin	0.668	0.01055
86	tonzonium bromide	0.729	0.01064
87	benzethonium chloride	0.824	0.01094
89	monensin	0.61	0.011
90	perhexiline	0.726	0.01132
91	norcyclobenzaprine	0.721	0.01231
92	desipramine	0.716	0.01325
93	quinostatin	0.918	0.01336
94	mepacrine	0.915	0.01433
95	miconazole	0.648	0.01526
96	ursolic acid	0.702	0.01627
98	homochlorcyclizine	0.7	0.01669
100	mebendazole	0.642	0.01686
101	diperodon	0.792	0.01827
104	flupentixol	0.693	0.01856
105	droperidol	0.692	0.01876
106	ouabain	0.691	0.01886
107	protriptyline	0.689	0.01963
108	metitepine	0.689	0.01965
109	mometasone	0.688	0.01991
110	pirlindole	0.786	0.02009
112	syrosingopine	0.68	0.0228
113	cloperastine	0.572	0.02286
114	labetalol	0.679	0.02316
115	butoconazole	0.679	0.02318
116	anisomycin	0.677	0.02357
117	benzydamine	0.676	0.02409
118	deptropine	0.676	0.02409
119	thioproperazine	0.616	0.02453
121	azacyclonol	0.613	0.02577
122	epiandrosterone	0.671	0.02602
123	resveratrol	0.465	0.02602
124	alvespimycin	0.404	0.02646
125	quinidine	0.761	0.02732
128	5224221	0.878	0.03002
130	Prestwick-981	0.75	0.03095
132	MG-262	0.748	0.03149
133	econazole	0.656	0.03223
134	tribenoside	0.654	0.03342
135	trifluridine	0.652	0.03416
136	proadifen	0.652	0.03434
137	CP-690334-01	0.47	0.03747
139	scriptaid	0.731	0.0383
140	terconazole	0.643	0.03923
141	verapamil	0.534	0.03989
142	sodium phenylbutyrate	0.496	0.03996
143	lasalocid	0.64	0.04078
144	propranolol	0.638	0.04178
145	lynestrenol	0.578	0.04197
146	MS-275	0.855	0.04251
147	clenbuterol	0.577	0.04296
148	levomepromazine	0.636	0.04313
149	fluoxetine	0.633	0.04474
152	maprotiline	0.633	0.04482
153	zuclopenthixol	0.632	0.04573
154	co-dergocrine mesilate	0.627	0.04844
156	dosulepin	0.627	0.0485
157
Gabapentin-500	cmap name	enrichment	p
rank	gabapentin	1	0
1	propylthiouracil	0.947	0
3	azlocillin	0.938	2e-05
4	amrinone	0.915	4e-05
5	ebselen	0.962	8e-05
6	corbadrine	0.905	8e-05
7	doxazosin	0.896	0.0001
8	cetirizine	0.885	0.00018
10	trimipramine	0.863	0.00048
14	tanespimycin	0.253	0.00048
15	rilmenidine	0.855	0.00056
16	bergenin	0.849	0.00074
17	lomefloxacin	0.729	0.00103
21	repaglinide	0.828	0.00133
22	quinidine	0.9	0.00198
23	salbutamol	0.752	0.00228
25	theobromine	0.802	0.00288
27	milrinone	0.875	0.00365
28	pridinol	0.77	0.00545
33	vidarabine	0.749	0.00762
34	altizide	0.744	0.00804
36	luteolin	0.739	0.00887
37	Prestwick-685	0.665	0.01119
41	natamycin	0.724	0.01162
42	bacitracin	0.818	0.01196
43	ioversol	0.721	0.01213
44	zomepirac	0.716	0.01327
46	ursodeoxycholic acid	0.806	0.01472
48	sulfamethoxypyridazine	0.649	0.01492
49	dropropizine	0.707	0.01514
50	thiostrepton	0.704	0.01597
52	piperidolate	0.796	0.01741
54	meropenem	0.695	0.01818
55	flucytosine	0.692	0.01874
56	estriol	0.692	0.0188
57	abamectin	0.685	0.02097
60	carbachol	0.683	0.0217
62	isoetarine	0.675	0.02451
67	oxprenolol	0.674	0.02475
68	flunarizine	0.673	0.02499
69	fosfosal	0.673	0.02514
71	propidium iodide	0.665	0.02863
73	sisomicin	0.663	0.0292
75	rimexolone	0.663	0.02926
76	mepyramine	0.661	0.03016
78	canavanine	0.748	0.03163
80	canrenoic acid	0.655	0.0329
82	ramifenazone	0.654	0.0333
83	piperacetazine	0.651	0.03513
85	norcyclobenzaprine	0.649	0.03599
86	GW-8510	0.648	0.03634
88	chlorpromazine	0.313	0.03835
93	famprofazone	0.535	0.03919
95	AG-028671	0.728	0.03958
96	praziquantel	0.639	0.04122
100	gliclazide	0.638	0.04172
101	pyridoxine	0.636	0.04283
102	atropine methonitrate	0.72	0.04351
103	mebendazole	0.576	0.04356
104	sulfamethizole	0.634	0.04404
106	nabumetone	0.631	0.04615
109	apigenin	0.63	0.04645
110	chlorphenesin	0.628	0.04798
111	tiratricol	0.626	0.04882
112	isoconazole	0.567	0.04886
113
Haloperidol-500	cmap name	enrichment	p
rank	astemizole	0.956	0
1	loperamide	0.939	0
2	trifluoperazine	0.77	0
3	thioridazine	0.753	0
4	geldanamycin	0.687	0
5	prochlorperazine	0.677	0
6	fluphenazine	0.641	0
7	15-delta prostaglandin J2	0.587	0
8	wortmannin	0.559	0
9	haloperidol	0.514	0
10	trichostatin A	0.484	0
11	tanespimycin	0.338	0
12	CP-645525-01	0.97	4e-05
13	tetrandrine	0.924	4e-05
14	niclosamide	0.889	6e-05
15	perphenazine	0.885	6e-05
16	prenylamine	0.909	8e-05
17	vorinostat	0.624	8e-05
18	noretynodrel	0.893	0.00012
19	nordihydroguaiaretic acid	0.543	0.0002
20	terfenadine	0.943	0.00022
21	pyrvinium	0.78	0.00028
22	metixene	0.875	0.00034
23	withaferin A	0.869	0.0004
24	tonzonium bromide	0.856	0.00056
26	mefloquine	0.789	0.00092
27	suloctidil	0.824	0.00161
29	mometasone	0.814	0.00231
32	5707885	0.81	0.00243
33	parthenolide	0.808	0.00253
34	metitepine	0.793	0.00362
37	troglitazone	0.42	0.00429
41	resveratrol	0.547	0.0043
42	helveticoside	0.662	0.00431
43	sulindac	0.613	0.00439
44	metergoline	0.775	0.00477
45	10-methoxyharmalan	0.756	0.00684
49	butoconazole	0.75	0.00758
50	securinine	0.748	0.0077
51	thiamazole	0.625	0.0085
52	doxepin	0.835	0.00905
53	buspirone	0.735	0.00965
54	nortriptyline	0.734	0.00979
55	ciclopirox	0.73	0.01054
56	thiostrepton	0.729	0.01056
57	homochlorcyclizine	0.722	0.01188
60	desipramine	0.719	0.01253
62	ciclosporin	0.596	0.01408
65	5224221	0.912	0.01559
66	bepridil	0.7	0.01655
68	levomepromazine	0.699	0.01701
69	norcyclobenzaprine	0.699	0.01701
70	ivermectin	0.632	0.01916
72	strophanthidin	0.682	0.02184
76	glycopyrronium bromide	0.624	0.02207
77	thioproperazine	0.62	0.02337
79	piperacetazine	0.678	0.02349
80	MG-262	0.771	0.02392
81	calmidazolium	0.891	0.02487
82	pirenzepine	0.613	0.02581
83	pergolide	0.671	0.02586
84	fluspirilene	0.669	0.0266
85	oxyphenbutazone	0.669	0.02678
86	pirlindole	0.761	0.02732
87	perhexiline	0.663	0.02926
89	disulfiram	0.604	0.02952
90	rescinnamine	0.752	0.02999
91	benzethonium chloride	0.747	0.03183
93	amoxapine	0.599	0.03192
94	spiperone	0.866	0.03678
97	pizotifen	0.647	0.03686
98	methylbenzethonium chloride	0.539	0.03717
100	protriptyline	0.64	0.04074
103	cyproheptadine	0.578	0.04211
104	monensin	0.53	0.04289
105	azathioprine	0.491	0.04417
107	flecainide	0.527	0.04469
109	josamycin	0.571	0.04638
110	deptropine	0.627	0.04868
111	hexetidine	0.625	0.04971
112	Prestwick-981	0.705	0.04996
113
Imipramine-500	cmap name	enrichment	p
rank	imipramine	1	0
1	trifluoperazine	0.668	0
2	thioridazine	0.585	0
4	tanespimycin	0.536	0
5	trichostatin A	0.474	0
6	cloperastine	0.842	2e-05
7	prochlorperazine	0.582	2e-05
8	vorinostat	0.633	8e-05
9	phenoxybenzamine	0.901	0.0001
10	geldanamycin	0.544	0.0002
11	fluphenazine	0.489	0.0002
12	LY-294002	0.259	0.00024
13	thiostrepton	0.88	0.00028
15	amitriptyline	0.769	0.00042
18	methylbenzethonium chloride	0.758	0.0005
19	moxisylyte	0.813	0.00058
20	withaferin A	0.851	0.00072
21	pyrvinium	0.733	0.00099
23	resveratrol	0.603	0.00106
24	bepridil	0.833	0.00117
25	quinisocaine	0.831	0.00125
26	clomifene	0.825	0.00147
27	helveticoside	0.714	0.00153
28	15-delta prostaglandin J2	0.463	0.00162
29	astemizole	0.748	0.00236
30	bufexamac	0.799	0.00312
32	digoxin	0.792	0.00368
33	canrenoic acid	0.788	0.00396
34	tonzonium bromide	0.781	0.00434
35	chlorpromazine	0.387	0.00475
36	chlorcyclizine	0.657	0.00481
37	mebendazole	0.701	0.00569
38	valproic acid	0.223	0.00613
39	niclosamide	0.693	0.00679
40	dyclonine	0.746	0.00788
41	clozapine	0.386	0.00873
42	chlorprothixene	0.737	0.00937
43	perphenazine	0.672	0.00989
44	suloctidil	0.733	0.00991
45	mefloquine	0.667	0.01089
46	benzonatate	0.663	0.01156
48	alimemazine	0.722	0.01202
49	protriptyline	0.718	0.01281
50	desipramine	0.717	0.01311
51	pimozide	0.716	0.01323
52	nortriptyline	0.714	0.01343
53	ouabain	0.709	0.01466
56	orciprenaline	0.709	0.01476
57	rottlerin	0.806	0.01484
58	bisacodyl	0.707	0.01522
59	prenylamine	0.705	0.0157
61	8-azaguanine	0.704	0.01583
63	tetrandrine	0.698	0.01721
64	metergoline	0.695	0.01808
65	alvespimycin	0.42	0.01852
66	MS-275	0.905	0.01861
67	dosulepin	0.692	0.01876
68	disulfiram	0.633	0.0189
69	flupentixol	0.689	0.01965
70	oxetacaine	0.63	0.01985
71	trioxysalen	0.688	0.01993
72	clomipramine	0.688	0.02005
73	nisoxetine	0.687	0.02017
74	homochlorcyclizine	0.681	0.02216
77	ciclosporin	0.572	0.02265
79	nordihydroguaiaretic acid	0.373	0.02265
80	Prestwick-920	0.679	0.02318
82	orphenadrine	0.569	0.02368
83	beta-escin	0.562	0.0265
85	idoxuridine	0.611	0.02679
86	noretynodrel	0.668	0.02711
88	acetazolamide	0.664	0.02865
90	metrifonate	0.605	0.0292
91	cefalotin	0.661	0.03
92	clotrimazole	0.603	0.03008
93	pipenzolate bromide	0.66	0.03069
94	levomepromazine	0.656	0.03223
95	ivermectin	0.598	0.03232
96	spironolactone	0.596	0.03324
97	metixene	0.654	0.03352
98	nicergoline	0.588	0.03621
99	perhexiline	0.647	0.03724
100	fluspirilene	0.646	0.0374
101	promazine	0.536	0.03895
102	CP-645525-01	0.729	0.03914
103	norcyclobenzaprine	0.641	0.04044
104	strophanthidin	0.64	0.04078
106	sulfacetamide	0.639	0.04152
107	doxepin	0.721	0.04293
109	dicycloverine	0.574	0.04464
111	clofazimine	0.573	0.04494
112	dipivefrine	0.633	0.04518
113	syrosingopine	0.633	0.04518
114	parthenolide	0.632	0.04534
115	abamectin	0.631	0.04607
116	fenoterol	0.712	0.04655
117	isoconazole	0.569	0.04794
118	felodipine	0.485	0.04796
119	dienestrol	0.708	0.04861
120	S-propranolol	0.626	0.04882
121
Ketoprofen-500	cmap name	enrichment	p
rank	ketoprofen	1	0
1	medrysone	0.904	0
2	apigenin	0.893	0.00012
4	meticrane	0.817	0.00046
8	carbachol	0.847	0.00078
10	bromopride	0.736	0.00085
11	morantel	0.792	0.00086
12	cycloserine	0.829	0.00131
14	flunarizine	0.826	0.00143
15	repaglinide	0.815	0.00219
18	lorglumide	0.751	0.00232
20	8-azaguanine	0.782	0.00428
23	sulconazole	0.779	0.00448
26	zomepirac	0.767	0.00567
28	procaine	0.695	0.00643
30	hexestrol	0.746	0.0079
33	luteolin	0.745	0.00796
34	cloperastine	0.619	0.00938
37	ethaverine	0.737	0.00939
38	etamsylate	0.734	0.00983
40	sanguinarine	0.928	0.01002
41	chrysin	0.824	0.01088
42	flucytosine	0.727	0.01096
43	demeclocycline	0.608	0.01128
44	N-acetyl-L-leucine	0.725	0.0115
45	lomefloxacin	0.601	0.01277
46	sulfamethoxypyridazine	0.647	0.01538
47	nipecotic acid	0.703	0.01607
48	clemizole	0.643	0.01652
50	rimexolone	0.699	0.01703
51	cetirizine	0.697	0.01763
53	6-benzylaminopurine	0.633	0.01902
59	pempidine	0.631	0.01967
60	norethisterone	0.687	0.02035
62	gliclazide	0.686	0.02043
63	Prestwick-1084	0.682	0.02184
65	oxaprozin	0.569	0.02368
67	cefalotin	0.675	0.02445
69	flunixin	0.616	0.02453
70	0179445-0000	0.492	0.02581
72	aminocaproic acid	0.763	0.02638
73	chlorzoxazone	0.667	0.02725
76	vorinostat	0.402	0.02746
77	bisacodyl	0.663	0.02912
81	acetylsalicylic acid	0.385	0.02915
82	fenbufen	0.55	0.03125
83	amiodarone	0.6	0.03128
84	fenoprofen	0.55	0.03152
85	phthalylsulfathiazole	0.586	0.03739
93	levamisole	0.646	0.0378
94	tyloxapol	0.646	0.03804
95	meclofenoxate	0.537	0.03832
96	alpha-estradiol	0.339	0.03856
97	sitosterol	0.644	0.03867
98	spiperone	0.86	0.0395
99	digoxin	0.634	0.04404
103	fipexide	0.718	0.04413
104	(-)-atenolol	0.631	0.04595
108	labetalol	0.631	0.04607
110	triflusal	0.712	0.04641
111	omeprazole	0.63	0.04663
113	ronidazole	0.71	0.04751
116	GW-8510	0.628	0.04812
117	oxprenolol	0.628	0.04812
118
Levonorgestrel-500	cmap name	enrichment	p
rank	levonorgestrel	0.997	0
1	GW-8510	0.947	0
2	medrysone	0.891	0
4	fenoprofen	0.89	0
5	trichostatin A	0.195	0
6	tanespimycin	0.284	2e-05
8	meticrane	0.863	8e-05
11	meclofenoxate	0.806	8e-05
12	8-azaguanine	0.873	0.00036
14	demeclocycline	0.747	0.0007
17	acetylsalicylic acid	0.528	0.00078
18	camptothecin	0.925	0.00082
19	phthalylsulfathiazole	0.794	0.00086
20	flunixin	0.793	0.00086
21	equilin	0.791	0.00088
22	thioguanosine	0.84	0.00103
23	sulconazole	0.831	0.00127
25	apigenin	0.827	0.00139
28	flumetasone	0.716	0.00151
29	metamizole sodium	0.714	0.00153
30	astemizole	0.765	0.00162
31	mitoxantrone	0.907	0.0017
32	sulfamethoxypyridazine	0.757	0.002
34	rimexolone	0.811	0.00241
35	cloperastine	0.683	0.00256
37	H-7	0.79	0.00388
39	pancuronium bromide	0.78	0.0044
40	labetalol	0.777	0.00471
41	sanguinarine	0.948	0.00487
42	chlorpromazine	0.383	0.00556
43	alvespimycin	0.475	0.00561
44	omeprazole	0.762	0.00605
46	chrysin	0.847	0.00693
49	flupentixol	0.753	0.00718
50	thiostrepton	0.743	0.00828
53	isoconazole	0.676	0.00913
56	etamsylate	0.735	0.00965
59	papaverine	0.731	0.01044
61	alpha-estradiol	0.39	0.01085
63	roxithromycin	0.727	0.01096
64	eucatropine	0.609	0.01118
65	tropicamide	0.597	0.01383
66	butyl hydroxybenzoate	0.65	0.01482
68	lymecycline	0.705	0.0157
71	hydralazine	0.589	0.01615
72	gliclazide	0.702	0.01635
73	hexestrol	0.701	0.01651
74	fluvoxamine	0.7	0.01677
77	eldeline	0.586	0.01724
79	norfloxacin	0.64	0.01734
80	sulfametoxydiazine	0.697	0.01763
81	deferoxamine	0.511	0.01801
82	famprofazone	0.583	0.01822
83	verteporfin	0.792	0.01827
84	6-azathymine	0.69	0.01908
87	norcyclobenzaprine	0.69	0.0192
88	mefloquine	0.63	0.01997
89	thioridazine	0.329	0.02024
90	oxaprozin	0.577	0.02036
91	dextromethorphan	0.683	0.02166
93	DL-thiorphan	0.898	0.02171
94	alexidine	0.681	0.0222
95	doxazosin	0.679	0.02316
97	estropipate	0.679	0.02316
98	Prestwick-1084	0.677	0.02379
99	tracazolate	0.676	0.02401
101	ellipticine	0.674	0.02485
104	aminohippuric acid	0.673	0.02512
106	MS-275	0.89	0.02525
107	amoxicillin	0.669	0.02674
108	cetirizine	0.668	0.02688
109	alsterpaullone	0.762	0.0269
110	clonidine	0.667	0.02729
111	0297417-0002B	0.756	0.02882
112	Prestwick-674	0.552	0.03029
113	sulfaphenazole	0.66	0.0304
114	3-acetylcoumarin	0.602	0.0307
115	phenoxybenzamine	0.66	0.03077
116	triflusal	0.746	0.03197
117	cycloserine	0.654	0.0333
118	selegiline	0.649	0.03599
124	STOCK1N-35215	0.735	0.03617
125	ifenprodil	0.648	0.03654
126	pivampicillin	0.646	0.0378
128	heliotrine	0.537	0.038
129	doxorubicin	0.73	0.03854
130	picrotoxinin	0.642	0.0403
133	pramocaine	0.578	0.0425
135	nabumetone	0.636	0.04269
136	phenindione	0.635	0.04372
137	hydrocortisone	0.713	0.04637
139	galantamine	0.629	0.04729
140	clemizole	0.568	0.04854
141	meptazinol	0.627	0.04868
142	fluorometholone	0.625	0.04933
144	salsolinol	0.706	0.04974
146	difenidol	0.706	0.04992
148
Metformin-500	cmap name	enrichment	p
rank	metformin	0.987	0
1	pilocarpine	0.85	0.00072
5	quercetin	0.74	0.00083
6	kaempferol	0.832	0.00119
7	diprophylline	0.739	0.0028
9	pirenperone	0.738	0.00288
10	ampicillin	0.8	0.003
11	diphenhydramine	0.727	0.00348
13	SC-19220	0.792	0.00364
14	benzocaine	0.789	0.00392
15	heptaminol	0.717	0.00419
17	Y-27632	0.95	0.00449
18	thioperamide	0.702	0.00557
19	3-acetamidocoumarin	0.762	0.00611
20	homatropine	0.691	0.00707
21	viomycin	0.751	0.00742
22	josamycin	0.675	0.00935
23	citalopram	0.711	0.0142
28	mefenamic acid	0.641	0.01706
30	gabexate	0.693	0.01846
32	colistin	0.672	0.02524
39	pentetic acid	0.613	0.02611
40	0173570-0000	0.56	0.02741
42	flucloxacillin	0.665	0.02861
44	pivmecillinam	0.661	0.03
45	pizotifen	0.657	0.03183
46	naftifine	0.655	0.03304
48	quinpirole	0.653	0.03372
49	guanabenz	0.594	0.03434
51	khellin	0.591	0.03513
52	nefopam	0.585	0.03801
55	sulfadimidine	0.537	0.03806
56	netilmicin	0.643	0.03923
57	nifedipine	0.497	0.03964
58	spaglumic acid	0.859	0.04014
59	indoprofen	0.639	0.0412
60	moracizine	0.636	0.04269
62	amantadine	0.636	0.04307
63	piperacillin	0.576	0.04324
64	meclocycline	0.632	0.04544
66	halofantrine	0.709	0.04803
68	mexiletine	0.52	0.04877
69	5155877	0.624	0.04983
71
Methyldopa-500	cmap name	enrichment	p
rank	methyldopa	1	0
1	sulfafurazole	0.949	0
2	rolitetracycline	0.909	6e-05
3	clenbuterol	0.855	0.00014
4	amiodarone	0.793	0.00086
8	epivincamine	0.843	0.00097
10	medrysone	0.727	0.00109
12	sanguinarine	0.965	0.00211
13	trimetazidine	0.813	0.00235
14	roxarsone	0.807	0.00257
16	torasemide	0.793	0.00362
17	probucol	0.666	0.00397
18	nabumetone	0.785	0.0041
19	clioquinol	0.714	0.00447
21	serotonin	0.71	0.00477
22	sulfamethoxypyridazine	0.694	0.00655
25	clofazimine	0.694	0.00663
26	testosterone	0.682	0.00823
28	apomorphine	0.679	0.00879
29	metamizole sodium	0.62	0.00924
31	zomepirac	0.732	0.01009
32	gliclazide	0.729	0.01056
33	aminohippuric acid	0.729	0.01064
34	flurbiprofen	0.666	0.01099
35	harmalol	0.822	0.0112
37	lymecycline	0.723	0.01166
38	famprofazone	0.602	0.01253
39	roxithromycin	0.716	0.01325
40	meclozine	0.655	0.01334
41	thioguanosine	0.71	0.01444
42	verteporfin	0.804	0.0153
44	kinetin	0.7	0.01667
45	2,6-dimethylpiperidine	0.642	0.0167
46	aminophenazone	0.642	0.01672
47	rimexolone	0.697	0.01757
50	tolfenamic acid	0.695	0.0181
52	bephenium hydroxynaphthoate	0.629	0.02041
54	pentoxyverine	0.685	0.02109
56	lorglumide	0.625	0.02155
57	octopamine	0.682	0.022
58	xylazine	0.681	0.02238
60	loperamide	0.561	0.02684
64	mebendazole	0.61	0.02704
65	dacarbazine	0.663	0.02906
69	riboflavin	0.663	0.0292
70	florfenicol	0.66	0.03058
71	trazodone	0.75	0.03099
72	enoxacin	0.659	0.03129
73	luteolin	0.654	0.0333
76	dipyridamole	0.543	0.035
77	pyridoxine	0.649	0.03628
78	norethisterone	0.645	0.03815
80	tobramycin	0.645	0.03853
81	cefalexin	0.584	0.03867
82	alpha-estradiol	0.338	0.03882
83	citiolone	0.535	0.03965
84	eucatropine	0.533	0.0407
85	chrysin	0.725	0.04072
86	dobutamine	0.64	0.04076
87	epiandrosterone	0.638	0.04193
88	pirenperone	0.577	0.04296
90	zoxazolamine	0.63	0.04683
91	selegiline	0.629	0.04697
92	nisoxetine	0.629	0.04729
93	proadifen	0.628	0.04808
94	propylthiouracil	0.626	0.04882
95	propantheline bromide	0.625	0.04965
96
Metixene-500	cmap name	enrichment	p
rank	metixene	1	0
1	digoxin	0.95	0
2	helveticoside	0.914	0
3	chlorcyclizine	0.874	0
4	trifluoperazine	0.82	0
5	thioridazine	0.649	0
6	prochlorperazine	0.641	0
7	fluphenazine	0.565	0
8	trichostatin A	0.433	0
9	LY-294002	0.396	0
10	tanespimycin	0.389	0
11	sirolimus	0.36	0
12	methylbenzethonium chloride	0.863	2e-05
13	tetrandrine	0.908	8e-05
14	15-delta prostaglandin J2	0.554	8e-05
15	ciclopirox	0.894	0.0001
16	terconazole	0.89	0.00014
17	fluspirilene	0.884	0.00018
18	gossypol	0.788	0.00022
19	geldanamycin	0.534	0.00022
20	tonzonium bromide	0.877	0.0003
21	bisacodyl	0.866	0.00044
23	biotin	0.934	0.00046
24	piperacetazine	0.849	0.00074
26	protriptyline	0.847	0.0008
27	progesterone	0.846	0.0008
28	dicloxacillin	0.845	0.00088
29	benzethonium chloride	0.923	0.00094
30	niclosamide	0.787	0.00096
31	withaferin A	0.833	0.00117
33	nordihydroguaiaretic acid	0.472	0.00134
34	vorinostat	0.52	0.00142
35	lanatoside C	0.708	0.00171
36	chlorprothixene	0.811	0.00237
37	trimipramine	0.809	0.00247
38	colecalciferol	0.802	0.0029
40	CP-645525-01	0.881	0.00333
42	digoxigenin	0.724	0.00366
43	nortriptyline	0.791	0.00372
44	5707885	0.767	0.00569
47	ouabain	0.765	0.00581
49	prenylamine	0.754	0.00704
53	profenamine	0.747	0.00786
57	cloperastine	0.628	0.00818
58	digitoxigenin	0.743	0.00834
59	clofilium tosylate	0.835	0.00901
61	perphenazine	0.671	0.01015
62	doxepin	0.825	0.01076
63	glycopyrronium bromide	0.664	0.01137
65	MG-262	0.817	0.01208
66	homochlorcyclizine	0.721	0.01213
67	terguride	0.531	0.0127
69	rescinnamine	0.813	0.01302
70	perhexiline	0.716	0.01323
71	azlocillin	0.712	0.014
72	epiandrosterone	0.711	0.01436
73	pyrvinium	0.593	0.01478
74	clemastine	0.805	0.01496
75	dequalinium chloride	0.705	0.01562
77	zuclopenthixol	0.7	0.01671
80	clozapine	0.361	0.0173
81	fluoxetine	0.696	0.01774
82	clemizole	0.635	0.01832
84	loperamide	0.581	0.01877
85	nefopam	0.629	0.02011
88	astemizole	0.626	0.02127
91	pimethixene	0.775	0.02293
95	parthenolide	0.678	0.02335
96	delsoline	0.676	0.02421
97	norcyclobenzaprine	0.675	0.02445
98	hexetidine	0.668	0.02711
100	terfenadine	0.761	0.02722
101	clofazimine	0.609	0.02734
102	beta-escin	0.557	0.02837
104	desipramine	0.665	0.02839
105	phenelzine	0.553	0.03001
107	butoconazole	0.66	0.03058
108	oxyphenbutazone	0.656	0.03256
109	amiodarone	0.597	0.0329
112	wortmannin	0.326	0.03316
113	securinine	0.654	0.03342
115	pizotifen	0.653	0.03372
116	0175029-0000	0.543	0.03488
119	Prestwick-981	0.737	0.03557
120	ebselen	0.733	0.0373
122	5224221	0.863	0.03797
123	mefloquine	0.584	0.03855
125	mianserin	0.579	0.04127
126	clomifene	0.637	0.04265
128	suloctidil	0.635	0.04337
129	phenazopyridine	0.635	0.04372
131	clomipramine	0.634	0.04404
132	ivermectin	0.57	0.04682
137	rifampicin	0.629	0.04709
138	alvespimycin	0.374	0.04943
141
Naltrexone-500	cmap name	enrichment	p
rank	naltrexone	1	0
1	diazoxide	0.875	6e-05
2	tanespimycin	0.271	6e-05
3	disulfiram	0.828	0.00032
4	pindolol	0.775	0.00128
7	pralidoxime	0.806	0.00265
8	isoniazid	0.737	0.0029
9	oxybenzone	0.787	0.00402
13	prednisone	0.715	0.00439
14	chenodeoxycholic acid	0.78	0.00444
15	alvespimycin	0.47	0.00641
17	Prestwick-1082	0.848	0.00663
19	esculetin	0.842	0.00771
20	corticosterone	0.742	0.00849
23	iopamidol	0.739	0.00881
24	doxylamine	0.673	0.00975
26	phenazone	0.83	0.00979
27	bacitracin	0.819	0.01172
28	Prestwick-984	0.713	0.01365
30	tetrahydroalstonine	0.693	0.0186
34	molindone	0.692	0.01876
36	cinchonine	0.692	0.01884
37	ofloxacin	0.625	0.02169
39	anisomycin	0.68	0.0226
41	iloprost	0.773	0.02338
43	geldanamycin	0.368	0.02487
45	pronetalol	0.673	0.02512
46	meptazinol	0.673	0.02514
47	SC-560	0.753	0.02946
51	lycorine	0.602	0.0307
52	naringenin	0.657	0.03209
53	atropine oxide	0.598	0.03244
54	hexetidine	0.649	0.03628
55	moroxydine	0.587	0.03701
58	proguanil	0.73	0.03862
60	zidovudine	0.643	0.03899
61	ursolic acid	0.641	0.0406
63	zardaverine	0.634	0.04416
65	dicycloverine	0.574	0.0445
66	tiapride	0.568	0.04854
69	homosalate	0.626	0.0487
70	amprolium	0.565	0.0496
72
Nortriptyline-500	cmap name	enrichment	p
rank	nortriptyline	1	0
1	homochlorcyclizine	0.971	0
2	fluspirilene	0.945	0
3	trifluoperazine	0.881	0
4	prochlorperazine	0.874	0
5	thioridazine	0.81	0
6	trichostatin A	0.612	0
7	fluphenazine	0.563	0
8	LY-294002	0.477	0
9	sirolimus	0.386	0
10	tanespimycin	0.33	0
11	pyrvinium	0.869	2e-05
12	cloperastine	0.826	4e-05
13	trazodone	0.965	6e-05
14	vorinostat	0.61	8e-05
15	econazole	0.903	0.0001
16	bepridil	0.901	0.0001
17	phenoxybenzamine	0.896	0.0001
18	bufexamac	0.894	0.0001
19	norcyclobenzaprine	0.89	0.00014
20	pimethixene	0.947	0.00018
21	protriptyline	0.885	0.00018
22	geldanamycin	0.544	0.0002
23	methylbenzethonium chloride	0.772	0.00032
25	CP-645525-01	0.938	0.00038
26	phenazopyridine	0.861	0.0005
28	astemizole	0.815	0.00052
29	haloperidol	0.353	0.00056
30	tetrandrine	0.853	0.0007
33	0297417-0002B	0.925	0.00086
36	piperacetazine	0.843	0.00097
37	thiostrepton	0.835	0.00115
39	mefloquine	0.776	0.00122
41	15-delta prostaglandin J2	0.476	0.00126
42	niclosamide	0.767	0.0015
43	tonzonium bromide	0.824	0.00151
44	rottlerin	0.908	0.00166
45	nordihydroguaiaretic acid	0.453	0.00226
46	rifabutin	0.891	0.00246
47	resveratrol	0.571	0.00256
48	quinostatin	0.959	0.00294
49	valproic acid	0.236	0.00314
51	mebendazole	0.728	0.00346
52	suloctidil	0.794	0.00348
53	ionomycin	0.878	0.00351
54	chlorpromazine	0.396	0.00361
55	withaferin A	0.787	0.004
57	perphenazine	0.71	0.00475
59	quinisocaine	0.771	0.00533
60	amiodarone	0.692	0.00687
61	antimycin A	0.688	0.00731
63	amitriptyline	0.628	0.0082
64	chlorprothixene	0.743	0.00828
65	proadifen	0.739	0.00897
66	promazine	0.62	0.00924
67	perhexiline	0.737	0.00937
69	rescinnamine	0.828	0.01026
71	promethazine	0.725	0.01148
73	terfenadine	0.817	0.01206
75	ebselen	0.816	0.01232
76	procaine	0.655	0.01348
77	oxetacaine	0.652	0.01392
78	ifenprodil	0.712	0.01406
79	ursolic acid	0.712	0.01412
80	fenbendazole	0.711	0.01412
81	noretynodrel	0.711	0.0142
82	loperamide	0.594	0.01458
83	doxepin	0.805	0.01506
84	flupentixol	0.704	0.01593
85	alfaxalone	0.799	0.01669
86	adrenosterone	0.7	0.01669
87	wortmannin	0.352	0.01674
88	desipramine	0.698	0.01707
89	syrosingopine	0.693	0.01852
92	MG-262	0.79	0.01857
93	clomipramine	0.692	0.01884
95	prenylamine	0.689	0.01963
97	puromycin	0.684	0.02133
99	pimozide	0.683	0.0217
101	fluoxetine	0.678	0.02322
103	alexidine	0.677	0.02367
104	clotrimazole	0.617	0.02433
105	metergoline	0.675	0.02445
106	scriptaid	0.768	0.0248
107	chenodeoxycholic acid	0.673	0.02499
108	cortisone	0.765	0.0259
111	disulfiram	0.612	0.02627
113	monensin	0.561	0.0267
114	reserpine	0.761	0.02708
116	imipramine	0.666	0.02803
117	deptropine	0.665	0.02839
118	enilconazole	0.665	0.02851
119	gossypol	0.557	0.02856
120	dosulepin	0.662	0.02974
123	lysergol	0.662	0.02974
124	nicergoline	0.604	0.02978
125	fenofibrate	0.752	0.03021
126	milrinone	0.749	0.03123
127	metixene	0.657	0.03197
128	acepromazine	0.657	0.03209
129	menadione	0.873	0.03292
130	chlorcyclizine	0.546	0.03339
132	cyproheptadine	0.593	0.03473
133	clobetasol	0.738	0.03519
134	cisapride	0.649	0.03599
135	propafenone	0.649	0.03607
136	digoxin	0.649	0.03628
137	alimemazine	0.648	0.0365
138	amoxapine	0.588	0.03663
139	orphenadrine	0.536	0.03881
140	dilazep	0.583	0.03915
141	miconazole	0.583	0.03915
142	hexestrol	0.639	0.0412
143	ciclosporin	0.53	0.04263
145	telenzepine	0.636	0.04283
146	blebbistatin	0.853	0.0438
147	pinacidil	0.634	0.04404
148	pirlindole	0.714	0.04571
149	digitoxigenin	0.628	0.04808
151	lisinopril	0.709	0.04845
152	Prestwick-981	0.706	0.04992
153
Paroxetine-500	cmap name	enrichment	p
rank	paroxetine	1	0
1	citalopram	0.967	0
2	trichostatin A	0.277	0
4	CP-690334-01	0.746	2e-05
5	levcycloserine	0.931	4e-05
6	quinethazone	0.909	6e-05
7	spiradoline	0.898	0.0001
8	nialamide	0.895	0.0001
9	0175029-0000	0.764	0.00046
11	chlorambucil	0.858	0.00054
12	Prestwick-1080	0.853	0.0007
14	Prestwick-1100	0.849	0.00074
15	oxaprozin	0.723	0.00125
17	ethotoin	0.705	0.00175
18	PHA-00745360	0.62	0.00179
20	flutamide	0.754	0.00216
21	0179445-0000	0.607	0.00233
22	homosalate	0.802	0.0029
24	citiolone	0.668	0.00371
25	withaferin A	0.788	0.00394
26	santonin	0.764	0.00587
29	guaifenesin	0.644	0.00606
30	phenelzine	0.641	0.00636
31	vorinostat	0.462	0.00766
32	solasodine	0.622	0.00896
34	fludroxycortide	0.677	0.00897
35	tanespimycin	0.202	0.01013
37	tinidazole	0.613	0.01061
38	ciclacillin	0.728	0.01088
39	chlorcyclizine	0.606	0.01164
41	benzylpenicillin	0.722	0.01202
43	beta-escin	0.602	0.01253
44	apigenin	0.712	0.01406
49	parbendazole	0.709	0.01458
50	sulconazole	0.706	0.01538
51	meticrane	0.646	0.01554
52	alexidine	0.703	0.01613
53	camptothecin	0.799	0.01669
54	methylbenzethonium chloride	0.577	0.0204
57	flunixin	0.623	0.02219
59	digoxin	0.68	0.0226
60	Prestwick-664	0.572	0.0229
61	H-7	0.679	0.02308
62	milrinone	0.774	0.02332
63	rifabutin	0.759	0.02788
68	diethylstilbestrol	0.555	0.02938
70	delsoline	0.655	0.03284
73	liothyronine	0.655	0.03298
74	2,6-dimethylpiperidine	0.591	0.03519
78	tranylcypromine	0.588	0.03625
79	doxazosin	0.647	0.03712
80	apramycin	0.645	0.03835
82	lymecycline	0.642	0.0401
83	amrinone	0.637	0.04265
85	urapidil	0.635	0.04345
87	nipecotic acid	0.633	0.04482
88	alpha-ergocryptine	0.524	0.04632
89	sanguinarine	0.848	0.04682
90	progesterone	0.628	0.04816
91	suloctidil	0.624	0.04983
92
Prednisolone-500	cmap name	enrichment	p
rank	prednisolone	1	0
1	telenzepine	0.942	0
2	lisinopril	0.968	4e-05
3	bufexamac	0.933	4e-05
4	fludroxycortide	0.875	6e-05
5	dropropizine	0.895	0.0001
6	alclometasone	0.883	0.00024
[truncated: 231 more rows]
