# Supplementary figures and images for: Drug repositioning by applying ‘expression profiles’ generated by integrating chemical structure similarity and gene semantic similarity
Source: Royal Society of Chemistry journal article supplement (doi:10.1039/c3mb70554d), 2014-02-13

Ketoprofen

Mefenamic acid

Lumiracoxib

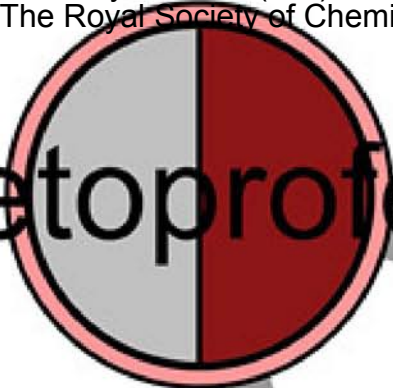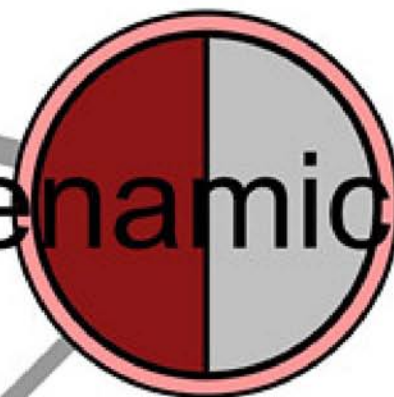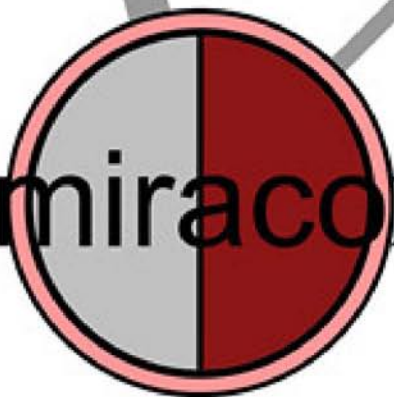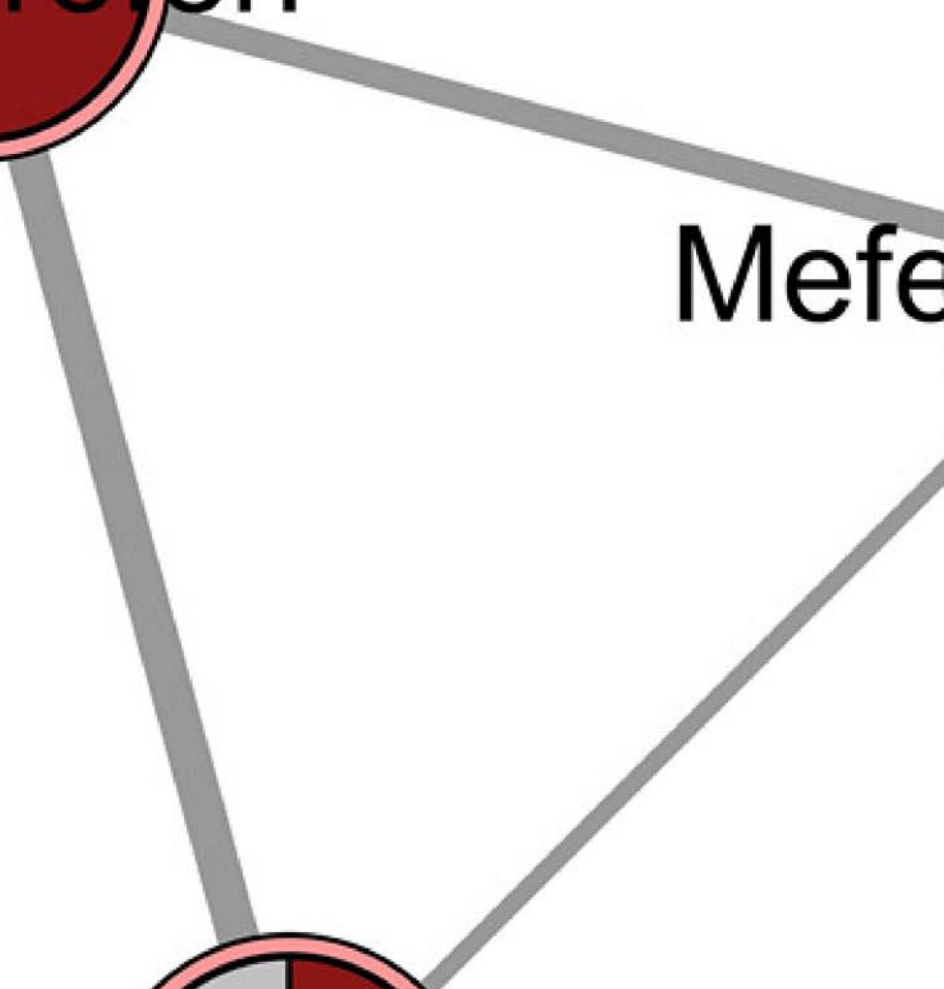

Supplement: c3mb70554d3.pdf [file c3mb70554d3.pdf]
